# Supplementary material
Source: HighWire-hosted journal article supplement (https://www.jrheum.org/highwire/filestream/38460/field_highwire_adjunct_files/0/191012DataSuppl.pdf)
Supplement: 191012DataSuppl.pdf [file 191012DataSuppl.pdf]

## **Supplementary Data 1.**

### *RNA isolation and sequencing*

300 µl serum aliquots were thawed in two batches and RNA was isolated using the Plasma/Serum Circulating and Exosomal RNA Purification Mini Slurry Kit (Norgen) and on-column DNase digestion performed in accordance with manufacturer's instructions. Eluted RNA was concentrated with a centrifugal evaporator (Labconco), and its quality assessed with an Agilent 2100 Bioanalyser using Small RNA chips (Agilent). cDNA libraries were prepared and uniquely barcoded using the NEB Next Multiplex Small RNA Library Prep Sets 1 and 2 for Illumina (NEB). The first batch of RNA isolated from 20 serum samples was subject to 3' SR adapter ligation incubation conditions of 1 hour at 25°C. For the second set of 22 serum samples, the 3' SR adapter ligation incubation conditions were modified to 18 hours at 16°C in order to increase library size. The remaining library preparation was performed in accordance with the manufacturer's protocol and specific reagents diluted for low RNA input as instructed. To deplete adapter dimers and excess primers, size selection was performed using Agencourt AMPure XP Beads (Beckman Coulter) according to the NEB supplementary protocol, but with cDNA captured at a bead concentration of 1.3X. cDNA libraries with unique barcodes were then pooled and sequenced across two lanes using a NextSeq 500 (Illumina), using the v2 75 cycle High Output kit (Illumina) to generate single end 75 base reads.

### *Differential expression and bioinformatic analysis*

Analysis of the RNAseq data was performed using R Statistical software v3.4.2. Prior to analysis, Illumina adaptor sequences were removed with Trimmomatic (1). All reads were aligned to the human genome hg19 using the Rsubread aligner version 1.22.2 (2), then mapped to annotations within the Database of small human noncoding RNAs (DASHR) (3). Read counts were summarised using featureCounts (4) and differential expression analyses

performed using the edgeR (5) and limma (6) software packages. Any RNA which did not achieve a count per million mapped reads greater than 1 in at least 12 samples was filtered out from the data. A total of 1487 sncRNAs remained. Compositional differences between libraries were normalized using the trimmed mean of log expression ratios method (7). Differential expression was assessed using negative binomial generalized log-linear models and likelihood ratio tests with corrections for batch effects caused by ligation time and sequencing lane incorporated (8). For correlation analysis, a new statistical design matrix was created that incorporated DAS28-ESR scores. Correlations between RNA expression and DAS28-ESR values were calculated using edgeR's likelihood ratio test. For multiple test correction, P-values were adjusted using the Benjamini and Hochberg method.

## References

1. Bolger AM, Lohse M, Usadel B. Trimmomatic: a flexible trimmer for Illumina sequence data. *Bioinformatics*. 2014;**30**:2114-20.
2. Liao Y, Smyth GK, Shi W. The R package Rsubread is easier, faster, cheaper and better for alignment and quantification of RNA sequencing reads. *Nucleic Acids Res*. 2019;**47**:e47.
3. Leung YY, Kuksa PP, Amlie-Wolf A, Valladares O, Ungar LH, Kannan S, et al. DASHR: database of small human noncoding RNAs. *Nucleic Acids Res*. 2016;**44**:D216-D22.
4. Liao Y, Smyth GK, Shi W. featureCounts: an efficient general purpose program for assigning sequence reads to genomic features. *Bioinformatics*. 2014;**30**:923-30.
5. Robinson MD, McCarthy DJ, Smyth GK. edgeR: a Bioconductor package for differential expression analysis of digital gene expression data. *Bioinformatics*. 2010;**26**:139-40.
6. Ritchie ME, Phipson B, Wu D, Hu Y, Law CW, Shi W, et al. limma powers differential expression analyses for RNA-sequencing and microarray studies. *Nucleic Acids Res*. 2015;**43**:e47.
7. Robinson MD, Oshlack A. A scaling normalization method for differential expression analysis of RNA-seq data. *Genome Biol*. 2010;**11**:R25.
8. McCarthy DJ, Chen Y, Smyth GK. Differential expression analysis of multifactor RNA-Seq experiments with respect to biological variation. *Nucleic Acids Res*. 2012;**40**:4288-97.



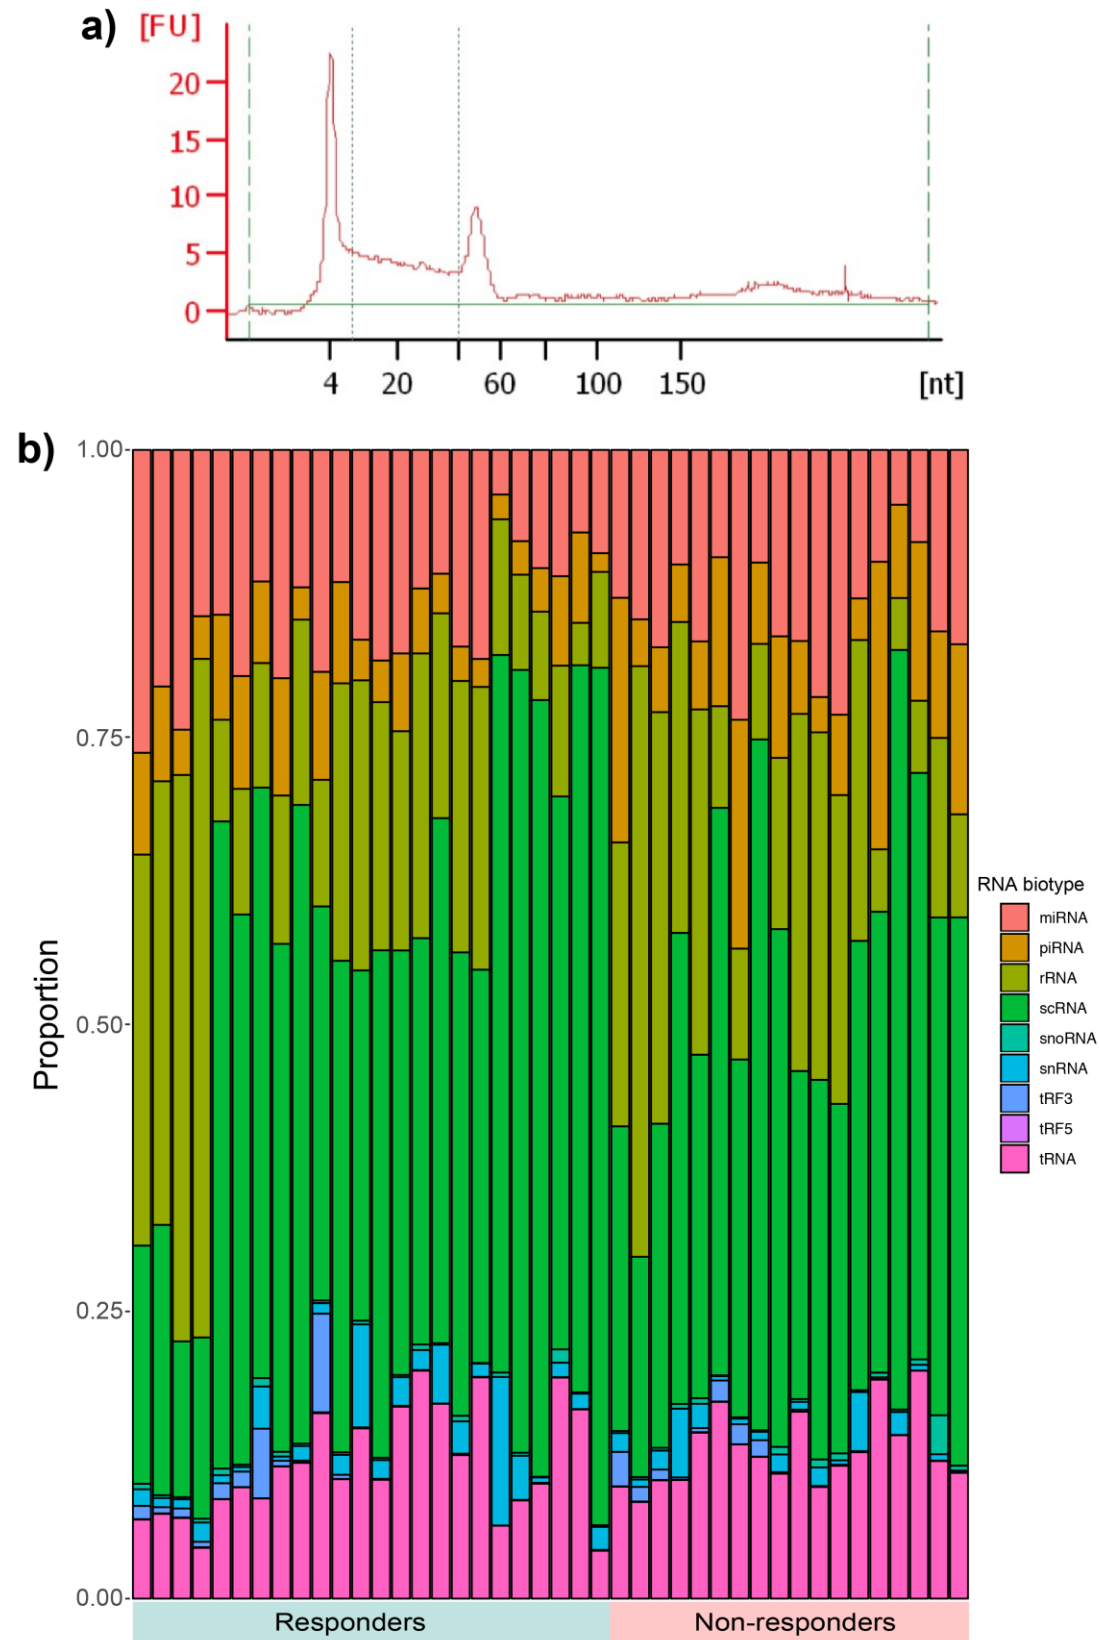

**Supplementary Figure 2**

a) Representative Bioanalyser trace of serum RNA isolation. b) Distribution of small RNA biotypes.

1. Ritchie ME, Phipson B, Wu D, Hu Y, Law CW, Shi W, et al. Limma powers differential expression analyses for rna-sequencing and microarray studies. *Nucleic Acids Res* 2015;43:e47.

**Supplementary Table 1: Sample read counts and normalisation factors**

| <b>Attribute</b> | <b>Total number of reads</b> | <b>Number of reads mapping to <i>sncRNA</i> annotations</b> | <b>Normalisation factor</b> |
|------------------|------------------------------|-------------------------------------------------------------|-----------------------------|
| Responder        | 7,770,281                    | 914,325                                                     | 1.36                        |
| Responder        | 5,668,774                    | 686,738                                                     | 0.96                        |
| Responder        | 2,931,641                    | 480,885                                                     | 1.02                        |
| Responder        | 1,773,196                    | 425,971                                                     | 0.95                        |
| Responder        | 24,356,210                   | 3,288,646                                                   | 0.85                        |
| Responder        | 20,655,934                   | 1,224,610                                                   | 0.98                        |
| Responder        | 4,305,354                    | 247,623                                                     | 1.31                        |
| Responder        | 7,247,784                    | 1,383,925                                                   | 0.83                        |
| Responder        | 4,297,386                    | 136,383                                                     | 1.38                        |
| Responder        | 7,859,261                    | 1,807,975                                                   | 0.85                        |
| Responder        | 5,203,402                    | 1,701,491                                                   | 0.51                        |
| Responder        | 3,746,660                    | 632,088                                                     | 0.66                        |
| Responder        | 319,144                      | 57,964                                                      | 2.25                        |
| Responder        | 19,534,124                   | 1,870,766                                                   | 1.49                        |
| Responder        | 16,383,732                   | 635,379                                                     | 1.75                        |
| Responder        | 5,644,829                    | 1,042,673                                                   | 0.95                        |
| Responder        | 3,874,415                    | 338,155                                                     | 1.01                        |
| Responder        | 22,613,419                   | 587,744                                                     | 0.84                        |
| Responder        | 9,584,454                    | 505,241                                                     | 1.22                        |
| Responder        | 5,456,239                    | 589,231                                                     | 0.96                        |
| Responder        | 3,284,524                    | 108,615                                                     | 1.37                        |
| Responder        | 7,522,751                    | 4,059,470                                                   | 0.51                        |
| Responder        | 4,209,955                    | 866,720                                                     | 0.73                        |
| Responder        | 3,849,347                    | 503,325                                                     | 0.87                        |
| Non-responder    | 1,807,509                    | 454,091                                                     | 1.31                        |
| Non-responder    | 15,832,955                   | 1,083,585                                                   | 1.10                        |
| Non-responder    | 10,720,031                   | 665,508                                                     | 1.31                        |
| Non-responder    | 9,550,399                    | 863,989                                                     | 1.03                        |
| Non-responder    | 4,305,272                    | 759,787                                                     | 1.63                        |
| Non-responder    | 1,438,980                    | 357,130                                                     | 0.82                        |
| Non-responder    | 6,672,021                    | 635,319                                                     | 0.88                        |
| Non-responder    | 2,988,656                    | 992,049                                                     | 0.80                        |
| Non-responder    | 793,373                      | 281,656                                                     | 1.18                        |
| Non-responder    | 6,422,380                    | 377,837                                                     | 1.48                        |
| Non-responder    | 2,918,559                    | 83,041                                                      | 1.58                        |
| Non-responder    | 4,610,791                    | 244,751                                                     | 1.59                        |
| Non-responder    | 12,579,222                   | 785,493                                                     | 1.08                        |
| Non-responder    | 9,312,396                    | 3,755,488                                                   | 0.47                        |

|               |            |           |      |
|---------------|------------|-----------|------|
| Non-responder | 11,197,251 | 5,178,844 | 0.42 |
| Non-responder | 30,981,399 | 9,812,944 | 0.64 |
| Non-responder | 17,003,536 | 4,856,830 | 1.01 |
| Non-responder | 13,543,304 | 3,776,649 | 0.78 |

**Supplementary Table 2: Results of differential expression analysis (responders vs non-responders)**

| <i>RNA type</i> | <i>ID</i>                | <i>Log2 fold change (Responders vs. Non-responders)</i> | <i>Average read count (log2 CPM)</i> | <i>Likelihood ratio</i> | <i>Unadjusted P-value</i> | <i>Adjusted P-value</i> |
|-----------------|--------------------------|---------------------------------------------------------|--------------------------------------|-------------------------|---------------------------|-------------------------|
| tRNA            | chr1.tRNA131-GlyCCC      | -2.02                                                   | 7.00                                 | 19.53                   | 9.91E-06                  | 0.01                    |
| rRNA            | 5S-L612                  | 1.72                                                    | 2.86                                 | 18.36                   | 1.83E-05                  | 0.01                    |
| tRNA            | chr2.tRNA13-AlaCGC       | -1.14                                                   | 6.52                                 | 17.16                   | 3.43E-05                  | 0.02                    |
| snRNA           | U2-L166                  | -2.72                                                   | 3.45                                 | 15.92                   | 6.60E-05                  | 0.02                    |
| piRNA           | piR-35982                | -1.29                                                   | 15.63                                | 15.34                   | 8.97E-05                  | 0.03                    |
| piRNA           | piR-35284                | -1.15                                                   | 8.07                                 | 12.67                   | 3.71E-04                  | 0.09                    |
| piRNA           | piR-60565-L12            | -0.89                                                   | 10.99                                | 11.69                   | 6.29E-04                  | 0.13                    |
| piRNA           | piR-60565-L4             | -0.82                                                   | 12.26                                | 11.55                   | 6.79E-04                  | 0.13                    |
| tRNA            | chr1.tRNA96-PseudoCCT    | -0.90                                                   | 8.20                                 | 9.94                    | 1.62E-03                  | 0.20                    |
| tRNA            | chr6.tRNA82-GlyGCC       | -1.07                                                   | 5.27                                 | 9.83                    | 1.72E-03                  | 0.20                    |
| rRNA            | LSU-rRNA_Hsa-L409        | 0.90                                                    | 4.71                                 | 9.77                    | 1.77E-03                  | 0.20                    |
| tRNA            | chr13.tRNA3-GluTTC       | -0.68                                                   | 10.17                                | 9.47                    | 2.09E-03                  | 0.20                    |
| tRNA            | chr6.tRNA37-ValAAC       | -0.89                                                   | 9.05                                 | 9.19                    | 2.43E-03                  | 0.20                    |
| rRNA            | LSU-rRNA_Hsa-L185        | -1.49                                                   | 2.41                                 | 9.15                    | 2.49E-03                  | 0.20                    |
| tRF3            | chr6.tRNA153-IleAAT-tRF3 | 1.73                                                    | 2.68                                 | 9.13                    | 2.52E-03                  | 0.20                    |
| mir-3p          | hsa-miR-324-3p           | -1.50                                                   | 1.81                                 | 9.09                    | 2.58E-03                  | 0.20                    |
| tRNA            | chr2.tRNA17-PseudoTTC    | -0.82                                                   | 7.07                                 | 8.81                    | 2.99E-03                  | 0.20                    |
| tRNA            | chr8.tRNA5-TyrGTA        | 2.33                                                    | 1.91                                 | 8.78                    | 3.05E-03                  | 0.20                    |
| tRNA            | chr1.tRNA99-ValCAC       | -0.81                                                   | 8.58                                 | 8.66                    | 3.25E-03                  | 0.20                    |
| snoRNA          | U37                      | -2.42                                                   | 1.76                                 | 8.66                    | 3.25E-03                  | 0.20                    |
| rRNA            | 5S-L558                  | -0.70                                                   | 7.28                                 | 8.64                    | 3.29E-03                  | 0.20                    |
| rRNA            | LSU-rRNA_Hsa-L339        | -1.83                                                   | 2.35                                 | 8.63                    | 3.30E-03                  | 0.20                    |
| tRNA            | chr7.tRNA7-CysGCA        | 1.11                                                    | 7.06                                 | 8.55                    | 3.46E-03                  | 0.20                    |
| tRF3            | chr17.tRNA13-GlyCCC-tRF3 | 0.94                                                    | 5.22                                 | 8.53                    | 3.49E-03                  | 0.20                    |
| snRNA           | U1-L138                  | -1.41                                                   | 3.38                                 | 8.43                    | 3.70E-03                  | 0.20                    |
| tRNA            | chr6.tRNA147-SerAGA      | -0.97                                                   | 8.22                                 | 8.43                    | 3.70E-03                  | 0.20                    |
| piRNA           | piR-31925                | -0.77                                                   | 11.30                                | 8.43                    | 3.70E-03                  | 0.20                    |
| mir-3p          | hsa-miR-125b-2-3p        | -1.74                                                   | 1.53                                 | 8.39                    | 3.76E-03                  | 0.20                    |
| piRNA           | piR-51810-L2             | -0.79                                                   | 8.21                                 | 8.27                    | 4.03E-03                  | 0.20                    |
| tRNA            | chr1.tRNA88-PseudoCCT    | -0.82                                                   | 6.19                                 | 8.23                    | 4.12E-03                  | 0.20                    |
| snRNA           | U17-L2                   | -1.64                                                   | 2.12                                 | 8.12                    | 4.39E-03                  | 0.21                    |
| rRNA            | LSU-rRNA_Hsa-L389        | 0.86                                                    | 10.71                                | 7.82                    | 5.17E-03                  | 0.24                    |
| tRNA            | chr1.tRNA2-GlyCCC        | -0.86                                                   | 5.38                                 | 7.75                    | 5.37E-03                  | 0.24                    |
| tRNA            | chr2.tRNA3-AlaAGC        | -1.31                                                   | 3.59                                 | 7.71                    | 5.49E-03                  | 0.24                    |
| rRNA            | 5S-L530                  | -1.44                                                   | 5.17                                 | 7.59                    | 5.87E-03                  | 0.25                    |
| rRNA            | LSU-rRNA_Hsa-L84         | -1.43                                                   | 2.85                                 | 7.53                    | 6.07E-03                  | 0.25                    |
| scRNA           | BC200-L28                | 1.35                                                    | 2.06                                 | 7.40                    | 6.52E-03                  | 0.26                    |
| snoRNA          | HBI-100                  | -0.73                                                   | 4.44                                 | 7.24                    | 7.14E-03                  | 0.27                    |



|            |                           |       |       |      |          |      |
|------------|---------------------------|-------|-------|------|----------|------|
| tRF5       | chr18.tRNA3-PseudoTCC-tRF | 2.09  | 1.35  | 7.23 | 7.16E-03 | 0.27 |
| tRNA       | chr1.tRNA43-GlyGCC        | -0.79 | 6.87  | 7.22 | 7.21E-03 | 0.27 |
| mir-3p     | hsa-miR-223-3p            | -0.90 | 7.30  | 7.12 | 7.60E-03 | 0.28 |
| piRNA      | piR-31925-L9              | -0.69 | 13.82 | 6.90 | 8.64E-03 | 0.31 |
| snoRNA     | U51                       | -1.53 | 2.71  | 6.75 | 9.37E-03 | 0.32 |
| tRNA       | chr6.tRNA122-PseudoTGC    | -1.55 | 2.61  | 6.66 | 9.84E-03 | 0.33 |
| piRNA      | piR-34535                 | -0.98 | 5.56  | 6.65 | 9.91E-03 | 0.33 |
| scRNA      | BC200-L32                 | 1.50  | 2.06  | 6.57 | 0.01     | 0.33 |
| tRNA       | chr17.tRNA13-GlyCCC       | -0.83 | 5.82  | 6.53 | 0.01     | 0.33 |
| mir-5p3pno | hsa-miR-1244-L2           | 1.51  | 1.66  | 6.44 | 0.01     | 0.35 |
| tRNA       | chr1.tRNA5-GluTTC         | 1.01  | 5.89  | 6.35 | 0.01     | 0.35 |
| tRNA       | chr1.tRNA137-Pseudo???    | -0.97 | 6.02  | 6.34 | 0.01     | 0.35 |
| piRNA      | piR-43325-L7              | 1.11  | 3.82  | 6.30 | 0.01     | 0.35 |
| mir-5p     | hsa-miR-200c-5p           | -1.84 | 2.02  | 6.26 | 0.01     | 0.35 |
| piRNA      | piR-33382-L2              | -1.84 | 2.24  | 6.23 | 0.01     | 0.35 |
| snoRNA     | U30                       | -1.21 | 6.13  | 6.07 | 0.01     | 0.38 |
| snoRNA     | ACA47                     | -1.07 | 3.23  | 5.93 | 0.01     | 0.39 |
| mir-5p     | hsa-miR-144-5p            | 0.84  | 5.62  | 5.92 | 0.02     | 0.39 |
| tRNA       | chr17.tRNA5-GlyGCC        | -0.59 | 7.52  | 5.89 | 0.02     | 0.39 |
| piRNA      | piR-60576-L6              | -0.66 | 8.04  | 5.89 | 0.02     | 0.39 |
| snRNA      | U2-L205                   | -1.57 | 1.72  | 5.87 | 0.02     | 0.39 |
| scRNA      | BC200-L149                | -1.47 | 1.76  | 5.81 | 0.02     | 0.39 |
| tRF3       | chr6.tRNA36-ArgACG-tRF3   | 1.06  | 4.47  | 5.78 | 0.02     | 0.39 |
| mir-3p     | hsa-miR-625-3p            | -0.74 | 4.68  | 5.72 | 0.02     | 0.40 |
| scRNA      | BC200-L139                | 0.82  | 3.27  | 5.68 | 0.02     | 0.40 |
| snRNA      | U3-L78                    | -1.03 | 4.40  | 5.55 | 0.02     | 0.42 |
| tRNA       | chr14.tRNA23-ProAGG       | -1.15 | 2.14  | 5.55 | 0.02     | 0.42 |
| snoRNA     | mgh28S-2409               | -1.34 | 3.15  | 5.35 | 0.02     | 0.46 |
| snoRNA     | U49A                      | -0.84 | 7.52  | 5.34 | 0.02     | 0.46 |
| scRNA      | HY5                       | 1.18  | 1.57  | 5.32 | 0.02     | 0.46 |
| snoRNA     | U49B                      | -1.72 | 1.62  | 5.29 | 0.02     | 0.46 |
| tRNA       | chr12.tRNA11-PheGAA       | 1.60  | 1.77  | 5.27 | 0.02     | 0.46 |
| tRNA       | chr1.tRNA85-ValCAC        | 0.85  | 3.44  | 5.22 | 0.02     | 0.46 |
| snRNA      | U1-L45                    | -0.78 | 6.78  | 5.21 | 0.02     | 0.46 |
| piRNA      | piR-53129                 | 1.35  | 1.55  | 5.18 | 0.02     | 0.46 |
| tRNA       | chr6.tRNA85-PseudoTTC     | -0.81 | 4.59  | 5.16 | 0.02     | 0.46 |
| scRNA      | BC200-L100                | 1.93  | 1.69  | 5.15 | 0.02     | 0.46 |
| scRNA      | HY3-L524                  | 1.33  | 1.56  | 5.10 | 0.02     | 0.47 |
| rRNA       | LSU-rRNA_Hsa-L257         | -0.95 | 4.58  | 5.06 | 0.02     | 0.47 |
| mir-3p     | hsa-miR-582-3p            | -0.89 | 4.81  | 4.97 | 0.03     | 0.48 |
| snRNA      | U2-L1058                  | 1.00  | 6.70  | 4.93 | 0.03     | 0.48 |
| tRNA       | chr6.tRNA31-SerGCT        | 1.51  | 3.19  | 4.92 | 0.03     | 0.48 |
| scRNA      | BC200-L117                | 1.38  | 1.83  | 4.91 | 0.03     | 0.48 |

|            |                         |       |       |      |      |      |
|------------|-------------------------|-------|-------|------|------|------|
| rRNA       | LSU-rRNA_Hsa-L163       | -0.91 | 9.10  | 4.91 | 0.03 | 0.48 |
| piRNA      | piR-35952-L5            | -1.14 | 2.44  | 4.85 | 0.03 | 0.49 |
| tRNA       | chr13.tRNA5-GluTTC      | -0.50 | 8.98  | 4.81 | 0.03 | 0.50 |
| piRNA      | piR-57824               | 1.37  | 1.45  | 4.77 | 0.03 | 0.50 |
| rRNA       | LSU-rRNA_Hsa-L166       | -1.60 | 5.43  | 4.76 | 0.03 | 0.50 |
| tRNA       | chr6.tRNA63-IleTAT      | 1.23  | 1.53  | 4.75 | 0.03 | 0.50 |
| rRNA       | 5S-L78                  | -0.82 | 2.70  | 4.71 | 0.03 | 0.51 |
| snRNA      | U6-L1561                | 1.49  | 2.12  | 4.63 | 0.03 | 0.52 |
| mir-3p     | hsa-miR-143-3p          | -0.57 | 9.70  | 4.62 | 0.03 | 0.52 |
| snoRNA     | U59B                    | -0.90 | 7.06  | 4.61 | 0.03 | 0.52 |
| mir-5p     | hsa-miR-1234-5p         | 0.65  | 14.77 | 4.58 | 0.03 | 0.52 |
| mir-5p3pno | hsa-miR-320c            | 0.55  | 4.43  | 4.54 | 0.03 | 0.53 |
| snoRNA     | U21                     | -0.99 | 4.60  | 4.51 | 0.03 | 0.53 |
| mir-3p     | hsa-miR-4732-3p         | 1.23  | 2.44  | 4.48 | 0.03 | 0.53 |
| scRNA      | HY1-L178                | 0.67  | 4.26  | 4.47 | 0.03 | 0.53 |
| mir-5p3pno | hsa-miR-1246            | 1.13  | 5.82  | 4.46 | 0.03 | 0.53 |
| tRNA       | chr2.tRNA22-PseudoTTG   | -0.89 | 3.03  | 4.41 | 0.04 | 0.54 |
| mir-5p3pno | hsa-miR-3928            | -1.31 | 1.51  | 4.36 | 0.04 | 0.55 |
| rRNA       | LSU-rRNA_Hsa-L67        | -1.12 | 3.16  | 4.35 | 0.04 | 0.55 |
| scRNA      | HY1-L3                  | 0.73  | 3.10  | 4.29 | 0.04 | 0.55 |
| rRNA       | 5S-L1196                | 1.32  | 2.22  | 4.29 | 0.04 | 0.55 |
| snoRNA     | U16                     | -1.14 | 2.75  | 4.27 | 0.04 | 0.55 |
| rRNA       | LSU-rRNA_Hsa-L381       | 1.05  | 2.74  | 4.25 | 0.04 | 0.55 |
| mir-5p     | hsa-miR-27a-5p          | -0.64 | 4.98  | 4.25 | 0.04 | 0.55 |
| piRNA      | piR-32377               | -0.55 | 6.91  | 4.25 | 0.04 | 0.55 |
| snRNA      | U2-L479                 | 1.44  | 1.54  | 4.23 | 0.04 | 0.55 |
| mir-3p     | hsa-miR-148b-3p         | -0.45 | 8.62  | 4.19 | 0.04 | 0.55 |
| scRNA      | BC200-L67               | -0.80 | 4.19  | 4.18 | 0.04 | 0.55 |
| scRNA      | BC200-L110              | 1.26  | 1.47  | 4.14 | 0.04 | 0.55 |
| piRNA      | piR-33468               | 1.14  | 1.61  | 4.11 | 0.04 | 0.55 |
| mir-5p3pno | hsa-miR-203a            | -1.83 | 2.28  | 4.10 | 0.04 | 0.55 |
| rRNA       | 5S-L99                  | -0.52 | 8.58  | 4.08 | 0.04 | 0.55 |
| piRNA      | piR-31935               | 0.65  | 4.57  | 4.08 | 0.04 | 0.55 |
| rRNA       | 5S-L61                  | -0.79 | 2.67  | 3.99 | 0.05 | 0.55 |
| tRF3       | chr6.tRNA61-MetCAT-tRF3 | 1.40  | 2.22  | 3.99 | 0.05 | 0.55 |
| snoRNA     | U26                     | -0.73 | 8.56  | 3.98 | 0.05 | 0.55 |
| tRNA       | chr17.tRNA10-GlyTCC     | -1.08 | 1.81  | 3.97 | 0.05 | 0.55 |
| snRNA      | U2-L1074                | 1.18  | 3.33  | 3.97 | 0.05 | 0.55 |
| snoRNA     | U81                     | -0.88 | 6.27  | 3.97 | 0.05 | 0.55 |
| rRNA       | 5S-L790                 | 0.76  | 4.09  | 3.95 | 0.05 | 0.55 |
| mir-3p     | hsa-miR-576-3p          | -0.54 | 4.04  | 3.95 | 0.05 | 0.55 |
| mir-5p     | hsa-let-7e-5p           | 0.54  | 5.52  | 3.95 | 0.05 | 0.55 |
| tRNA       | chr11.tRNA16-ValTAC     | -0.59 | 4.20  | 3.94 | 0.05 | 0.55 |

|            |                          |       |       |      |      |      |
|------------|--------------------------|-------|-------|------|------|------|
| mir-5p     | hsa-miR-199b-5p          | -0.92 | 2.97  | 3.93 | 0.05 | 0.55 |
| piRNA      | piR-43771-L6             | -0.88 | 2.90  | 3.91 | 0.05 | 0.55 |
| rRNA       | 5S-L233                  | 0.83  | 2.20  | 3.90 | 0.05 | 0.55 |
| scRNA      | HY3-L479                 | -1.19 | 2.10  | 3.90 | 0.05 | 0.55 |
| snoRNA     | mgU6-77                  | -0.90 | 4.50  | 3.89 | 0.05 | 0.55 |
| tRNA       | chr6.tRNA11-IleAAT       | 0.90  | 8.31  | 3.89 | 0.05 | 0.55 |
| scRNA      | HY3-L190                 | 0.81  | 2.20  | 3.87 | 0.05 | 0.55 |
| scRNA      | HY1-L191                 | 0.62  | 3.51  | 3.87 | 0.05 | 0.55 |
| mir-3p     | hsa-miR-140-3p           | -0.47 | 9.02  | 3.81 | 0.05 | 0.56 |
| tRNA       | chr6.tRNA36-ArgACG       | -1.26 | 1.39  | 3.79 | 0.05 | 0.56 |
| snoRNA     | U61                      | -0.79 | 5.55  | 3.79 | 0.05 | 0.56 |
| scRNA      | HY4-L47                  | 0.78  | 2.67  | 3.77 | 0.05 | 0.56 |
| rRNA       | 5S-L254                  | -0.77 | 2.29  | 3.76 | 0.05 | 0.56 |
| snRNA      | U2-L342                  | 0.96  | 5.41  | 3.75 | 0.05 | 0.56 |
| snRNA      | U2-L63                   | -0.88 | 2.16  | 3.74 | 0.05 | 0.56 |
| rRNA       | 5S-L112                  | -0.48 | 10.83 | 3.72 | 0.05 | 0.56 |
| mir-3p     | hsa-let-7f-2-3p          | 1.09  | 1.55  | 3.71 | 0.05 | 0.56 |
| mir-5p3pno | hsa-miR-942              | 0.77  | 3.31  | 3.69 | 0.05 | 0.56 |
| scRNA      | BC200-L90                | 0.84  | 2.60  | 3.69 | 0.05 | 0.56 |
| piRNA      | piR-33065                | -0.62 | 4.52  | 3.69 | 0.05 | 0.56 |
| tRNA       | chr16.tRNA24-GlyGCC      | -0.50 | 15.82 | 3.68 | 0.05 | 0.56 |
| piRNA      | piR-36041                | -0.49 | 7.32  | 3.67 | 0.06 | 0.56 |
| mir-5p3pno | hsa-miR-134              | 0.71  | 6.74  | 3.63 | 0.06 | 0.57 |
| rRNA       | 5S-L303                  | -1.13 | 2.33  | 3.62 | 0.06 | 0.57 |
| mir-5p     | hsa-miR-769-5p           | -0.77 | 3.02  | 3.62 | 0.06 | 0.57 |
| scRNA      | BC200-L116               | 1.02  | 2.42  | 3.60 | 0.06 | 0.57 |
| tRNA       | chr14.tRNA16-TyrGTA      | 0.96  | 3.58  | 3.59 | 0.06 | 0.57 |
| snoRNA     | U15B                     | -1.04 | 2.19  | 3.59 | 0.06 | 0.57 |
| scRNA      | HY4-L110                 | 1.25  | 1.99  | 3.57 | 0.06 | 0.57 |
| rRNA       | 5S-L97                   | -0.47 | 10.24 | 3.56 | 0.06 | 0.57 |
| mir-5p3pno | hsa-miR-941              | -0.46 | 6.39  | 3.53 | 0.06 | 0.58 |
| mir-5p3pno | hsa-miR-4473             | 1.14  | 1.40  | 3.51 | 0.06 | 0.58 |
| scRNA      | HY3-L478                 | 0.48  | 8.12  | 3.50 | 0.06 | 0.58 |
| piRNA      | piR-31638-L3             | -0.65 | 7.00  | 3.50 | 0.06 | 0.58 |
| snRNA      | U1-L63                   | -0.86 | 2.53  | 3.50 | 0.06 | 0.58 |
| tRNA       | chr6.tRNA78-LeuAAG       | -1.22 | 2.00  | 3.48 | 0.06 | 0.58 |
| tRNA       | chr11.tRNA8-SerGCT       | -0.68 | 4.09  | 3.45 | 0.06 | 0.58 |
| rRNA       | 5S-L1091                 | -0.97 | 1.37  | 3.44 | 0.06 | 0.58 |
| rRNA       | 5S-L583                  | -1.25 | 2.69  | 3.43 | 0.06 | 0.58 |
| rRNA       | LSU-rRNA_Hsa-L19         | 0.83  | 2.10  | 3.43 | 0.06 | 0.58 |
| snoRNA     | HBII-180C                | -0.82 | 4.12  | 3.42 | 0.06 | 0.58 |
| tRF5       | chr17.tRNA31-AsnGTT-tRF5 | 0.90  | 2.92  | 3.40 | 0.07 | 0.58 |
| tRNA       | chr1.tRNA116-GluCTC      | 0.57  | 3.79  | 3.39 | 0.07 | 0.58 |

|            |                          |       |       |      |      |      |
|------------|--------------------------|-------|-------|------|------|------|
| piRNA      | piR-47305                | -0.52 | 9.66  | 3.39 | 0.07 | 0.58 |
| snRNA      | U1-L142                  | -0.85 | 4.24  | 3.37 | 0.07 | 0.59 |
| piRNA      | piR-49145                | 0.83  | 2.41  | 3.34 | 0.07 | 0.59 |
| rRNA       | 5S-L255                  | -0.61 | 2.65  | 3.31 | 0.07 | 0.60 |
| snRNA      | U1-L78                   | -1.04 | 1.40  | 3.29 | 0.07 | 0.60 |
| mir-3p     | hsa-miR-382-3p           | -0.98 | 2.29  | 3.28 | 0.07 | 0.60 |
| rRNA       | 5S-L104                  | -0.44 | 10.61 | 3.24 | 0.07 | 0.60 |
| snRNA      | U2-L782                  | 0.94  | 2.99  | 3.24 | 0.07 | 0.60 |
| mir-3p     | hsa-miR-125a-3p          | -0.86 | 3.83  | 3.24 | 0.07 | 0.60 |
| scRNA      | HY1-L409                 | 0.66  | 2.73  | 3.23 | 0.07 | 0.60 |
| rRNA       | LSU-rRNA_Hsa-L378        | -1.02 | 2.46  | 3.22 | 0.07 | 0.60 |
| tRNA       | chr19.tRNA8-SeCTCA       | 0.46  | 5.87  | 3.22 | 0.07 | 0.60 |
| scRNA      | HY3-L203                 | 0.84  | 1.78  | 3.22 | 0.07 | 0.60 |
| snoRNA     | HBII-180A                | -1.23 | 2.03  | 3.21 | 0.07 | 0.60 |
| rRNA       | 5S-L1178                 | -0.83 | 1.51  | 3.20 | 0.07 | 0.60 |
| scRNA      | HY1-L304                 | 0.62  | 3.88  | 3.19 | 0.07 | 0.60 |
| tRNA       | chr1.tRNA79-GlyTCC       | -1.11 | 1.87  | 3.17 | 0.08 | 0.61 |
| scRNA      | HY1-L279                 | 0.52  | 4.02  | 3.15 | 0.08 | 0.61 |
| snoRNA     | U100                     | -1.12 | 1.54  | 3.12 | 0.08 | 0.62 |
| snRNA      | U2-L250                  | 0.98  | 12.48 | 3.11 | 0.08 | 0.62 |
| rRNA       | LSU-rRNA_Hsa-L266        | -0.90 | 3.17  | 3.10 | 0.08 | 0.62 |
| tRF5       | chr6.tRNA114-ArgCCG-tRF5 | 0.98  | 1.61  | 3.08 | 0.08 | 0.62 |
| tRNA       | chr2.tRNA11-PseudoTTG    | -0.66 | 6.71  | 3.08 | 0.08 | 0.62 |
| scRNA      | HY1-L374                 | 0.46  | 8.15  | 3.06 | 0.08 | 0.62 |
| snRNA      | U1-L71                   | -0.54 | 5.05  | 3.04 | 0.08 | 0.63 |
| rRNA       | 5S-L109                  | -0.41 | 9.56  | 3.03 | 0.08 | 0.63 |
| tRNA       | chr6.tRNA88-PseudoGAA    | 0.58  | 8.20  | 3.02 | 0.08 | 0.63 |
| tRNA       | chr14.tRNA8-CysGCA       | 1.36  | 4.27  | 3.00 | 0.08 | 0.63 |
| piRNA      | piR-52416-L2             | -0.88 | 2.28  | 3.00 | 0.08 | 0.63 |
| scRNA      | HY4-L96                  | -0.50 | 3.68  | 2.99 | 0.08 | 0.63 |
| piRNA      | piR-34536                | -0.59 | 5.56  | 2.99 | 0.08 | 0.63 |
| mir-5p3pno | hsa-miR-4472-L2          | 0.88  | 1.83  | 2.96 | 0.09 | 0.64 |
| scRNA      | HY1-L280                 | 0.69  | 2.44  | 2.94 | 0.09 | 0.64 |
| tRNA       | chr6.tRNA148-SerTGA      | 0.99  | 3.56  | 2.93 | 0.09 | 0.64 |
| snoRNA     | U80                      | -0.89 | 3.36  | 2.93 | 0.09 | 0.64 |
| tRNA       | chrX.tRNA4-ValTAC        | -0.60 | 5.20  | 2.93 | 0.09 | 0.64 |
| tRNA       | chr12.tRNA10-AspGTC      | 0.70  | 4.59  | 2.92 | 0.09 | 0.64 |
| mir-3p     | hsa-miR-148a-3p          | -0.43 | 13.46 | 2.90 | 0.09 | 0.64 |
| piRNA      | piR-36741                | -0.55 | 6.41  | 2.89 | 0.09 | 0.64 |
| tRF5       | chr1.tRNA90-ValCAC-tRF5  | -0.99 | 2.14  | 2.88 | 0.09 | 0.65 |
| tRNA       | chr17.tRNA20-MetCAT      | 1.16  | 1.87  | 2.87 | 0.09 | 0.65 |
| snRNA      | U2-L1061                 | 0.86  | 11.07 | 2.84 | 0.09 | 0.65 |
| piRNA      | piR-62011                | 0.48  | 8.25  | 2.84 | 0.09 | 0.65 |

|            |                        |       |       |      |      |      |
|------------|------------------------|-------|-------|------|------|------|
| snRNA      | U7-L207                | 1.44  | 2.19  | 2.84 | 0.09 | 0.65 |
| mir-3p     | hsa-miR-27b-3p         | -0.36 | 8.94  | 2.83 | 0.09 | 0.65 |
| rRNA       | 5S-L102                | -0.42 | 7.36  | 2.83 | 0.09 | 0.65 |
| tRNA       | chr6.tRNA152-ValCAC    | -0.44 | 8.52  | 2.81 | 0.09 | 0.65 |
| rRNA       | LSU-rRNA_Hsa-L300      | -0.86 | 7.63  | 2.80 | 0.09 | 0.65 |
| mir-5p     | hsa-let-7a-5p          | 1.06  | 2.02  | 2.79 | 0.10 | 0.65 |
| mir-3p     | hsa-miR-374a-3p        | -0.48 | 3.84  | 2.78 | 0.10 | 0.65 |
| rRNA       | 5S-L627                | -0.94 | 1.59  | 2.78 | 0.10 | 0.65 |
| piRNA      | piR-33382              | 0.52  | 8.69  | 2.75 | 0.10 | 0.66 |
| mir-3p     | hsa-miR-1306-3p        | -0.92 | 2.00  | 2.73 | 0.10 | 0.67 |
| rRNA       | 5S-L113                | -0.39 | 10.34 | 2.72 | 0.10 | 0.67 |
| tRNA       | chr14.tRNA12-PseudoTTT | 1.06  | 1.55  | 2.70 | 0.10 | 0.67 |
| snRNA      | U1-L174                | 0.81  | 1.76  | 2.68 | 0.10 | 0.67 |
| mir-5p     | hsa-miR-223-5p         | -0.45 | 8.71  | 2.68 | 0.10 | 0.67 |
| tRNA       | chr16.tRNA2-ArgCCT     | 0.67  | 3.09  | 2.68 | 0.10 | 0.67 |
| mir-3p     | hsa-miR-23a-3p         | -0.49 | 6.59  | 2.67 | 0.10 | 0.67 |
| mir-5p     | hsa-miR-145-5p         | 1.00  | 1.79  | 2.67 | 0.10 | 0.67 |
| scRNA      | HY1-L260               | 0.46  | 4.88  | 2.66 | 0.10 | 0.67 |
| piRNA      | piR-31068-L3           | -0.72 | 3.12  | 2.66 | 0.10 | 0.67 |
| mir-5p     | hsa-miR-301a-5p        | -0.91 | 1.39  | 2.64 | 0.10 | 0.67 |
| snoRNA     | snR39B                 | -0.63 | 5.72  | 2.64 | 0.10 | 0.67 |
| mir-5p     | hsa-miR-100-5p         | -0.48 | 6.59  | 2.62 | 0.11 | 0.67 |
| snoRNA     | SNORD127               | -0.90 | 4.77  | 2.62 | 0.11 | 0.67 |
| mir-5p     | hsa-miR-3606-5p        | 1.05  | 2.63  | 2.61 | 0.11 | 0.67 |
| piRNA      | piR-36742              | -0.47 | 5.16  | 2.61 | 0.11 | 0.67 |
| rRNA       | SSU-rRNA_Hsa-L16       | -0.53 | 6.78  | 2.60 | 0.11 | 0.67 |
| snRNA      | U2-L481                | -1.15 | 1.44  | 2.60 | 0.11 | 0.67 |
| mir-5p     | hsa-miR-221-5p         | -0.58 | 3.85  | 2.56 | 0.11 | 0.68 |
| tRF3       | chr3.tRNA6-CysGCA-trf3 | 0.99  | 2.19  | 2.56 | 0.11 | 0.68 |
| scRNA      | BC200-L166             | 0.72  | 2.95  | 2.55 | 0.11 | 0.68 |
| mir-5p3pno | hsa-miR-103b-L2        | -0.58 | 3.90  | 2.54 | 0.11 | 0.68 |
| tRNA       | chr5.tRNA8-AlaTGC      | -0.77 | 3.15  | 2.54 | 0.11 | 0.68 |
| scRNA      | BC200-L8               | 0.75  | 2.74  | 2.53 | 0.11 | 0.68 |
| tRNA       | chr6.tRNA105-AlaAGC    | 1.25  | 1.66  | 2.52 | 0.11 | 0.68 |
| mir-5p     | hsa-miR-4787-5p        | 1.04  | 1.33  | 2.51 | 0.11 | 0.68 |
| rRNA       | LSU-rRNA_Hsa-L41       | 1.06  | 1.50  | 2.51 | 0.11 | 0.68 |
| piRNA      | piR-33151-L4           | -0.52 | 4.06  | 2.50 | 0.11 | 0.68 |
| tRNA       | chr6.tRNA14-TyrGTA     | -0.93 | 1.90  | 2.50 | 0.11 | 0.68 |
| snoRNA     | U58B                   | -0.70 | 4.91  | 2.48 | 0.12 | 0.69 |
| mir-5p3pno | hsa-miR-328            | 0.59  | 4.07  | 2.48 | 0.12 | 0.69 |
| piRNA      | piR-31115-L4           | 0.43  | 7.28  | 2.46 | 0.12 | 0.69 |
| rRNA       | 5S-L829                | 0.71  | 2.65  | 2.45 | 0.12 | 0.69 |
| scRNA      | HY1-L192               | 0.40  | 5.99  | 2.44 | 0.12 | 0.69 |

|            |                         |       |      |      |      |      |
|------------|-------------------------|-------|------|------|------|------|
| rRNA       | 5S-L997                 | -1.08 | 1.97 | 2.44 | 0.12 | 0.69 |
| mir-5p3pno | hsa-miR-95              | -0.56 | 2.72 | 2.42 | 0.12 | 0.70 |
| mir-3p     | hsa-miR-629-3p          | 0.93  | 1.42 | 2.41 | 0.12 | 0.70 |
| snoRNA     | U46                     | -0.77 | 4.48 | 2.40 | 0.12 | 0.70 |
| rRNA       | LSU-rRNA_Hsa-L150       | 0.49  | 3.40 | 2.40 | 0.12 | 0.70 |
| mir-3p     | hsa-miR-197-3p          | -0.78 | 2.69 | 2.39 | 0.12 | 0.70 |
| tRNA       | chr7.tRNA8-CysGCA       | 0.93  | 1.87 | 2.39 | 0.12 | 0.70 |
| rRNA       | LSU-rRNA_Hsa-L174       | 0.75  | 1.61 | 2.37 | 0.12 | 0.70 |
| piRNA      | piR-57516               | 0.49  | 5.25 | 2.37 | 0.12 | 0.70 |
| scRNA      | BC200-L96               | -0.60 | 5.30 | 2.36 | 0.12 | 0.70 |
| snoRNA     | HBII-85-15              | -1.20 | 1.65 | 2.35 | 0.13 | 0.70 |
| scRNA      | HY1-L269                | -0.68 | 1.87 | 2.35 | 0.13 | 0.70 |
| snRNA      | U1-L39                  | -0.97 | 1.74 | 2.34 | 0.13 | 0.70 |
| rRNA       | LSU-rRNA_Hsa-L298       | -0.71 | 3.46 | 2.30 | 0.13 | 0.71 |
| mir-3p     | hsa-miR-574-3p          | -0.83 | 1.66 | 2.30 | 0.13 | 0.71 |
| snRNA      | U2-L981                 | 0.92  | 4.06 | 2.30 | 0.13 | 0.71 |
| mir-5p     | hsa-miR-99b-5p          | 0.41  | 6.89 | 2.30 | 0.13 | 0.71 |
| mir-5p     | hsa-miR-185-5p          | -0.45 | 8.24 | 2.29 | 0.13 | 0.71 |
| tRNA       | chr6.tRNA166-AlaAGC     | -0.97 | 1.77 | 2.29 | 0.13 | 0.71 |
| mir-5p     | hsa-miR-99a-5p          | -0.55 | 7.41 | 2.29 | 0.13 | 0.71 |
| tRF3       | chr18.tRNA1-GluCTC-tRF3 | 1.14  | 2.27 | 2.29 | 0.13 | 0.71 |
| snoRNA     | U104                    | -0.60 | 7.46 | 2.29 | 0.13 | 0.71 |
| scRNA      | BC200-L165              | 0.90  | 1.54 | 2.28 | 0.13 | 0.71 |
| rRNA       | LSU-rRNA_Hsa-L31        | -0.54 | 7.70 | 2.26 | 0.13 | 0.71 |
| tRNA       | chr12.tRNA2-SerCGA      | 1.49  | 1.52 | 2.26 | 0.13 | 0.71 |
| piRNA      | piR-38354               | 0.68  | 2.15 | 2.26 | 0.13 | 0.71 |
| scRNA      | HY1-L300                | 0.66  | 2.19 | 2.25 | 0.13 | 0.71 |
| snoRNA     | U50                     | -0.57 | 5.82 | 2.25 | 0.13 | 0.71 |
| rRNA       | LSU-rRNA_Hsa-L63        | -1.45 | 4.97 | 2.24 | 0.13 | 0.71 |
| tRNA       | chr6.tRNA15-TyrGTA      | 0.62  | 5.52 | 2.23 | 0.14 | 0.71 |
| tRNA       | chr6.tRNA153-IleAAT     | -1.06 | 1.68 | 2.23 | 0.14 | 0.71 |
| snoRNA     | U48                     | -0.58 | 5.72 | 2.21 | 0.14 | 0.71 |
| piRNA      | piR-51119               | -1.12 | 2.10 | 2.20 | 0.14 | 0.71 |
| rRNA       | 5S-L877                 | 0.61  | 2.33 | 2.20 | 0.14 | 0.71 |
| snoRNA     | U85                     | -0.66 | 3.06 | 2.20 | 0.14 | 0.71 |
| snoRNA     | U31                     | -0.54 | 7.96 | 2.20 | 0.14 | 0.71 |
| rRNA       | 5S-L136                 | -0.76 | 1.53 | 2.17 | 0.14 | 0.72 |
| rRNA       | LSU-rRNA_Hsa-L34        | -0.88 | 1.35 | 2.17 | 0.14 | 0.72 |
| snoRNA     | U58A                    | -0.65 | 5.02 | 2.16 | 0.14 | 0.72 |
| snoRNA     | U53                     | -0.89 | 2.70 | 2.16 | 0.14 | 0.72 |
| snRNA      | U6-L1308                | -0.73 | 2.67 | 2.15 | 0.14 | 0.72 |
| scRNA      | HY4-L116                | -0.46 | 3.88 | 2.13 | 0.14 | 0.72 |
| piRNA      | piR-34804               | 0.52  | 4.98 | 2.13 | 0.14 | 0.72 |

|            |                          |       |       |      |      |      |
|------------|--------------------------|-------|-------|------|------|------|
| scRNA      | BC200-L13                | 0.78  | 2.84  | 2.13 | 0.14 | 0.72 |
| mir-5p     | hsa-miR-642b-5p          | 0.91  | 1.56  | 2.12 | 0.15 | 0.73 |
| tRF3       | chr16.tRNA11-ProAGG-tRF3 | -0.80 | 1.79  | 2.11 | 0.15 | 0.73 |
| rRNA       | LSU-rRNA_Hsa-L360        | -0.60 | 1.84  | 2.10 | 0.15 | 0.73 |
| rRNA       | 5S-L946                  | -0.30 | 9.07  | 2.05 | 0.15 | 0.75 |
| tRNA       | chr16.tRNA33-PseudoAGG   | -0.64 | 3.64  | 2.04 | 0.15 | 0.75 |
| snoRNA     | U94                      | -0.79 | 3.12  | 2.04 | 0.15 | 0.75 |
| mir-3p     | hsa-miR-374b-3p          | 0.71  | 2.49  | 2.03 | 0.15 | 0.75 |
| tRNA       | chr5.tRNA22-AspGTC       | 1.00  | 1.97  | 2.02 | 0.15 | 0.75 |
| scRNA      | BC200-L122               | 0.54  | 3.31  | 2.02 | 0.16 | 0.75 |
| tRNA       | chr9.tRNA4-ArgTCT        | -0.88 | 1.63  | 2.01 | 0.16 | 0.75 |
| scRNA      | BC200-L101               | 0.99  | 1.85  | 2.01 | 0.16 | 0.75 |
| mir-5p3pno | hsa-miR-4488             | 0.82  | 1.35  | 1.99 | 0.16 | 0.75 |
| tRNA       | chr5.tRNA6-ValCAC        | -0.38 | 10.69 | 1.99 | 0.16 | 0.75 |
| mir-5p     | hsa-miR-148a-5p          | 0.44  | 4.17  | 1.99 | 0.16 | 0.75 |
| tRNA       | chr6.tRNA100-LeuCAA      | 0.52  | 3.49  | 1.99 | 0.16 | 0.75 |
| mir-3p     | hsa-miR-200a-3p          | -0.75 | 2.22  | 1.98 | 0.16 | 0.75 |
| snoRNA     | U102                     | -0.50 | 7.38  | 1.98 | 0.16 | 0.75 |
| snoRNA     | U47                      | -0.76 | 3.87  | 1.98 | 0.16 | 0.75 |
| mir-5p     | hsa-miR-183-5p           | 0.40  | 7.53  | 1.98 | 0.16 | 0.75 |
| mir-3p     | hsa-miR-363-3p           | 0.37  | 7.85  | 1.98 | 0.16 | 0.75 |
| scRNA      | HY1-L292                 | 0.39  | 5.48  | 1.97 | 0.16 | 0.75 |
| snRNA      | U2-L75                   | 0.89  | 4.87  | 1.97 | 0.16 | 0.75 |
| snRNA      | U4-L40                   | -0.61 | 2.99  | 1.96 | 0.16 | 0.75 |
| snoRNA     | U66                      | -0.85 | 1.79  | 1.95 | 0.16 | 0.75 |
| scRNA      | HY1-L26                  | 0.46  | 2.97  | 1.94 | 0.16 | 0.76 |
| tRNA       | chr1.tRNA39-GlyGCC       | -0.34 | 11.35 | 1.92 | 0.17 | 0.76 |
| snoRNA     | U74                      | -0.64 | 5.78  | 1.92 | 0.17 | 0.76 |
| snRNA      | U7-L212                  | 0.90  | 2.30  | 1.91 | 0.17 | 0.76 |
| mir-3p     | hsa-let-7d-3p            | 0.40  | 6.61  | 1.89 | 0.17 | 0.77 |
| piRNA      | piR-35952-L4             | -0.75 | 3.22  | 1.88 | 0.17 | 0.77 |
| scRNA      | HY4-L41                  | 0.53  | 1.86  | 1.88 | 0.17 | 0.77 |
| piRNA      | piR-31925-L8             | -0.42 | 7.36  | 1.87 | 0.17 | 0.77 |
| rRNA       | LSU-rRNA_Hsa-L305        | -0.48 | 5.25  | 1.87 | 0.17 | 0.77 |
| tRF5       | chr17.tRNA21-ArgCCT-tRF5 | -0.85 | 1.46  | 1.87 | 0.17 | 0.77 |
| scRNA      | HY1-L155                 | 0.53  | 2.69  | 1.87 | 0.17 | 0.77 |
| mir-5p     | hsa-miR-339-5p           | -0.90 | 1.85  | 1.86 | 0.17 | 0.77 |
| snRNA      | U3-L75                   | -0.70 | 3.12  | 1.85 | 0.17 | 0.77 |
| scRNA      | HY1-L114                 | 0.48  | 3.94  | 1.85 | 0.17 | 0.77 |
| snoRNA     | U3-3                     | -0.96 | 2.21  | 1.83 | 0.18 | 0.77 |
| rRNA       | 5S-L526                  | 0.89  | 1.32  | 1.83 | 0.18 | 0.77 |
| rRNA       | 5S-L103                  | 0.56  | 3.03  | 1.83 | 0.18 | 0.77 |
| mir-3p     | hsa-miR-199b-3p          | -0.36 | 7.58  | 1.83 | 0.18 | 0.77 |

|            |                           |       |       |      |      |      |
|------------|---------------------------|-------|-------|------|------|------|
| piRNA      | piR-44984-L3              | -0.52 | 2.62  | 1.83 | 0.18 | 0.77 |
| mir-5p     | hsa-miR-574-5p            | 0.46  | 4.85  | 1.83 | 0.18 | 0.77 |
| scRNA      | BC200-L151                | 0.63  | 2.08  | 1.82 | 0.18 | 0.77 |
| mir-5p     | hsa-miR-1307-5p           | 0.79  | 1.42  | 1.82 | 0.18 | 0.77 |
| scRNA      | HY4-L83                   | -0.43 | 4.19  | 1.81 | 0.18 | 0.77 |
| tRNA       | chr6.tRNA136-ValAAC       | 0.69  | 2.04  | 1.78 | 0.18 | 0.77 |
| snoRNA     | ACA34                     | -0.59 | 4.14  | 1.77 | 0.18 | 0.77 |
| snoRNA     | ACA9                      | -0.94 | 1.70  | 1.77 | 0.18 | 0.77 |
| scRNA      | BC200-L135                | 0.70  | 2.24  | 1.76 | 0.18 | 0.77 |
| snoRNA     | U41                       | -0.80 | 2.48  | 1.76 | 0.18 | 0.77 |
| snRNA      | U5-L3                     | -0.66 | 2.02  | 1.75 | 0.19 | 0.77 |
| snoRNA     | U84                       | -0.77 | 2.10  | 1.75 | 0.19 | 0.77 |
| snoRNA     | ACA53                     | -0.84 | 3.01  | 1.75 | 0.19 | 0.77 |
| tRF5       | chr16.tRNA8-ProTGG-tRF5   | -0.84 | 2.11  | 1.75 | 0.19 | 0.77 |
| scRNA      | HY3-L35                   | -0.78 | 2.20  | 1.74 | 0.19 | 0.77 |
| rRNA       | SSU-rRNA_Hsa-L65          | 0.41  | 4.28  | 1.74 | 0.19 | 0.77 |
| rRNA       | 5S-L602                   | 0.46  | 5.12  | 1.74 | 0.19 | 0.77 |
| snoRNA     | U82                       | -0.60 | 5.05  | 1.74 | 0.19 | 0.77 |
| snRNA      | U1-L17                    | -1.17 | 1.83  | 1.73 | 0.19 | 0.77 |
| scRNA      | HY1-L159                  | 0.44  | 4.34  | 1.73 | 0.19 | 0.77 |
| rRNA       | LSU-rRNA_Hsa-L385         | 0.38  | 8.75  | 1.72 | 0.19 | 0.77 |
| snoRNA     | U83B                      | -0.65 | 2.68  | 1.72 | 0.19 | 0.77 |
| mir-5p3pno | hsa-miR-375               | -0.47 | 6.00  | 1.72 | 0.19 | 0.77 |
| snRNA      | U2-L603                   | 0.72  | 6.16  | 1.72 | 0.19 | 0.77 |
| scRNA      | HY1-L443                  | 0.32  | 7.16  | 1.72 | 0.19 | 0.77 |
| mir-3p     | hsa-miR-361-3p            | -0.33 | 7.04  | 1.71 | 0.19 | 0.77 |
| tRF3       | chr3.tRNA2-ValAAC-tRF3    | 0.50  | 4.15  | 1.71 | 0.19 | 0.77 |
| mir-3p     | hsa-miR-101-3p            | -0.35 | 10.61 | 1.71 | 0.19 | 0.78 |
| rRNA       | 5S-L98                    | -0.30 | 9.83  | 1.69 | 0.19 | 0.78 |
| scRNA      | HY1-L57                   | 0.52  | 2.78  | 1.68 | 0.19 | 0.78 |
| tRNA       | chr16.tRNA27-LeuTAG       | -0.71 | 2.12  | 1.67 | 0.20 | 0.78 |
| tRNA       | chr16.tRNA31-PseudoTGG    | 0.84  | 3.01  | 1.67 | 0.20 | 0.78 |
| tRNA       | chr6.tRNA28-IleAAT        | 0.72  | 3.35  | 1.67 | 0.20 | 0.78 |
| mir-5p3pno | hsa-miR-3909              | -0.74 | 1.71  | 1.66 | 0.20 | 0.78 |
| tRF3       | chr14.tRNA14-GluTTC-tRF3  | -1.14 | 2.02  | 1.66 | 0.20 | 0.78 |
| piRNA      | piR-31447                 | -0.86 | 1.47  | 1.66 | 0.20 | 0.78 |
| snRNA      | U2-L405                   | 0.82  | 3.55  | 1.66 | 0.20 | 0.78 |
| mir-5p     | hsa-miR-150-5p            | -0.50 | 5.10  | 1.66 | 0.20 | 0.78 |
| scRNA      | HY1-L435                  | 0.39  | 3.49  | 1.66 | 0.20 | 0.78 |
| scRNA      | HY3-L159                  | 0.66  | 3.19  | 1.65 | 0.20 | 0.78 |
| scRNA      | HY3-L196                  | 0.58  | 1.85  | 1.65 | 0.20 | 0.78 |
| snoRNA     | U92                       | -0.53 | 2.16  | 1.65 | 0.20 | 0.78 |
| tRF3       | chr18.tRNA2-PseudoTCC-tRF | 0.63  | 3.09  | 1.64 | 0.20 | 0.78 |



|            |                     |       |       |      |      |      |
|------------|---------------------|-------|-------|------|------|------|
| piRNA      | piR-31068-L10       | -0.83 | 2.13  | 1.64 | 0.20 | 0.78 |
| mir-3p     | hsa-let-7i-3p       | -0.69 | 1.50  | 1.64 | 0.20 | 0.78 |
| snoRNA     | U106                | -0.80 | 1.86  | 1.64 | 0.20 | 0.78 |
| mir-5p     | hsa-miR-744-5p      | -0.33 | 6.54  | 1.63 | 0.20 | 0.78 |
| mir-3p     | hsa-miR-30c-2-3p    | 0.94  | 1.38  | 1.61 | 0.20 | 0.78 |
| mir-5p     | hsa-miR-196b-5p     | 0.62  | 2.79  | 1.61 | 0.20 | 0.78 |
| mir-5p     | hsa-miR-340-5p      | -0.36 | 6.42  | 1.61 | 0.20 | 0.78 |
| snRNA      | U5-L108             | 0.84  | 2.23  | 1.60 | 0.21 | 0.78 |
| piRNA      | piR-30890           | -0.60 | 3.30  | 1.60 | 0.21 | 0.78 |
| scRNA      | BC200-L147          | 0.78  | 2.25  | 1.59 | 0.21 | 0.79 |
| snoRNA     | U96a                | -0.63 | 3.47  | 1.58 | 0.21 | 0.79 |
| mir-3p     | hsa-miR-28-3p       | -0.27 | 7.13  | 1.57 | 0.21 | 0.80 |
| rRNA       | 5S-L573             | 0.49  | 3.03  | 1.56 | 0.21 | 0.80 |
| rRNA       | LSU-rRNA_Hsa-L211   | 0.64  | 1.63  | 1.55 | 0.21 | 0.80 |
| tRNA       | chr6.tRNA138-ArgACG | 0.77  | 1.66  | 1.55 | 0.21 | 0.80 |
| snoRNA     | U38B                | -0.63 | 2.95  | 1.55 | 0.21 | 0.80 |
| scRNA      | BC200-L16           | 1.05  | 1.59  | 1.54 | 0.21 | 0.80 |
| scRNA      | BC200-L156          | 0.45  | 2.60  | 1.53 | 0.22 | 0.80 |
| mir-3p     | hsa-miR-378a-3p     | -0.26 | 8.57  | 1.53 | 0.22 | 0.80 |
| scRNA      | HY1-L100            | 0.30  | 8.91  | 1.53 | 0.22 | 0.80 |
| tRNA       | chr11.tRNA12-ProTGG | -0.37 | 8.16  | 1.53 | 0.22 | 0.80 |
| scRNA      | HY5-L7              | 0.64  | 2.29  | 1.52 | 0.22 | 0.80 |
| snoRNA     | U32A                | -0.71 | 4.08  | 1.51 | 0.22 | 0.80 |
| mir-5p3pno | hsa-miR-378g        | 0.56  | 2.04  | 1.51 | 0.22 | 0.80 |
| scRNA      | BC200-L93           | 0.86  | 1.59  | 1.50 | 0.22 | 0.80 |
| mir-5p     | hsa-miR-15b-5p      | -0.44 | 2.72  | 1.50 | 0.22 | 0.80 |
| mir-3p     | hsa-miR-144-3p      | 0.38  | 5.77  | 1.50 | 0.22 | 0.80 |
| piRNA      | piR-31038           | -0.33 | 9.22  | 1.50 | 0.22 | 0.80 |
| mir-5p3pno | hsa-miR-1-L2        | -0.46 | 4.82  | 1.49 | 0.22 | 0.80 |
| tRNA       | chr17.tRNA2-LysTTT  | 0.56  | 3.04  | 1.49 | 0.22 | 0.80 |
| scRNA      | HY1-L143            | 0.54  | 2.32  | 1.49 | 0.22 | 0.80 |
| piRNA      | piR-61174           | -0.84 | 1.23  | 1.48 | 0.22 | 0.80 |
| rRNA       | LSU-rRNA_Hsa-L304   | -0.69 | 2.50  | 1.48 | 0.22 | 0.80 |
| scRNA      | HY3-L279            | 0.37  | 5.21  | 1.48 | 0.22 | 0.80 |
| mir-3p     | hsa-miR-3184-3p     | 0.25  | 11.60 | 1.47 | 0.23 | 0.80 |
| mir-5p3pno | hsa-miR-320a        | 0.22  | 11.48 | 1.47 | 0.23 | 0.80 |
| snoRNA     | U35A                | -0.74 | 1.80  | 1.46 | 0.23 | 0.80 |
| mir-5p     | hsa-miR-25-5p       | -0.70 | 2.07  | 1.45 | 0.23 | 0.80 |
| scRNA      | HY1-L223            | 0.30  | 6.19  | 1.45 | 0.23 | 0.80 |
| snoRNA     | ACA20               | -0.69 | 2.31  | 1.45 | 0.23 | 0.80 |
| scRNA      | BC200-L167          | 0.65  | 1.58  | 1.45 | 0.23 | 0.80 |
| mir-3p     | hsa-miR-3187-3p     | 0.74  | 1.63  | 1.45 | 0.23 | 0.80 |
| piRNA      | piR-36716           | -0.63 | 2.87  | 1.44 | 0.23 | 0.80 |

|            |                          |       |       |      |      |      |
|------------|--------------------------|-------|-------|------|------|------|
| snRNA      | U1-L11                   | -0.56 | 3.91  | 1.44 | 0.23 | 0.80 |
| snoRNA     | ACA11                    | -0.68 | 2.12  | 1.44 | 0.23 | 0.80 |
| rRNA       | SSU-rRNA_Hsa-L33         | 0.30  | 12.79 | 1.43 | 0.23 | 0.80 |
| scRNA      | HY1-L391                 | 0.28  | 14.88 | 1.43 | 0.23 | 0.80 |
| rRNA       | LSU-rRNA_Hsa-L4          | 0.34  | 8.09  | 1.42 | 0.23 | 0.80 |
| tRNA       | chr19.tRNA2-GlyTCC       | -0.42 | 4.14  | 1.41 | 0.23 | 0.80 |
| snoRNA     | U25                      | -0.59 | 5.20  | 1.41 | 0.24 | 0.80 |
| scRNA      | BC200-L128               | 0.50  | 2.65  | 1.39 | 0.24 | 0.80 |
| tRF5       | chr8.tRNA12-TyrGTA-tRF5  | -0.77 | 2.21  | 1.39 | 0.24 | 0.80 |
| mir-5p3pno | hsa-miR-511-L2           | -0.54 | 3.90  | 1.38 | 0.24 | 0.80 |
| snoRNA     | U18A                     | -0.56 | 6.81  | 1.38 | 0.24 | 0.80 |
| snoRNA     | mgh28S-2411              | -0.48 | 6.56  | 1.37 | 0.24 | 0.80 |
| piRNA      | piR-36494                | 0.88  | 2.00  | 1.37 | 0.24 | 0.80 |
| rRNA       | LSU-rRNA_Hsa-L355        | -0.46 | 3.31  | 1.36 | 0.24 | 0.80 |
| rRNA       | 5S-L550                  | -0.44 | 2.32  | 1.36 | 0.24 | 0.80 |
| tRNA       | chr11.tRNA13-PheGAA      | 0.59  | 3.60  | 1.36 | 0.24 | 0.80 |
| rRNA       | 5S-L194                  | 0.39  | 2.89  | 1.36 | 0.24 | 0.80 |
| mir-5p3pno | hsa-miR-152              | -0.35 | 5.59  | 1.36 | 0.24 | 0.80 |
| piRNA      | piR-33151-L8             | -0.35 | 4.43  | 1.36 | 0.24 | 0.80 |
| snoRNA     | U57                      | -0.52 | 4.69  | 1.36 | 0.24 | 0.80 |
| rRNA       | LSU-rRNA_Hsa-L367        | 0.26  | 7.90  | 1.36 | 0.24 | 0.80 |
| snoRNA     | HBII-85-10               | -0.62 | 1.77  | 1.36 | 0.24 | 0.80 |
| snRNA      | U13_-L44                 | 0.73  | 1.56  | 1.35 | 0.25 | 0.80 |
| mir-3p     | hsa-miR-22-3p            | 0.24  | 10.18 | 1.34 | 0.25 | 0.80 |
| rRNA       | 5S-L106                  | 0.33  | 12.29 | 1.34 | 0.25 | 0.80 |
| snRNA      | U1-L38                   | 0.68  | 1.64  | 1.34 | 0.25 | 0.80 |
| tRF3       | chr16.tRNA28-ProTGG-tRF3 | 0.72  | 1.99  | 1.33 | 0.25 | 0.80 |
| scRNA      | HY3-L359                 | 0.73  | 1.92  | 1.33 | 0.25 | 0.80 |
| mir-3p     | hsa-miR-25-3p            | -0.28 | 12.18 | 1.32 | 0.25 | 0.80 |
| tRNA       | chr6.tRNA175-SerGCT      | 1.02  | 2.06  | 1.32 | 0.25 | 0.80 |
| piRNA      | piR-33151-L9             | -0.40 | 3.44  | 1.32 | 0.25 | 0.80 |
| piRNA      | piR-36444                | -0.59 | 2.53  | 1.32 | 0.25 | 0.80 |
| scRNA      | BC200-L20                | 0.76  | 1.94  | 1.31 | 0.25 | 0.80 |
| snoRNA     | U45A                     | -0.51 | 4.15  | 1.31 | 0.25 | 0.80 |
| mir-5p     | hsa-miR-4665-5p          | -0.72 | 1.60  | 1.30 | 0.25 | 0.80 |
| mir-3p     | hsa-miR-369-3p           | 0.71  | 1.38  | 1.30 | 0.25 | 0.80 |
| rRNA       | LSU-rRNA_Hsa-L251        | -0.31 | 7.46  | 1.30 | 0.25 | 0.80 |
| rRNA       | LSU-rRNA_Hsa-L93         | 0.30  | 7.67  | 1.30 | 0.25 | 0.80 |
| tRNA       | chr22.tRNA1-SeCTCA       | 0.48  | 2.22  | 1.29 | 0.26 | 0.80 |
| scRNA      | HY1-L243                 | 0.29  | 6.54  | 1.29 | 0.26 | 0.80 |
| tRNA       | chr6.tRNA40-ValTAC       | -0.43 | 2.73  | 1.29 | 0.26 | 0.80 |
| tRF5       | chr11.tRNA16-ValTAC-tRF5 | -0.72 | 1.57  | 1.29 | 0.26 | 0.80 |
| mir-5p     | hsa-let-7a-5p-L3         | 0.23  | 12.09 | 1.28 | 0.26 | 0.80 |

|            |                           |       |      |      |      |      |
|------------|---------------------------|-------|------|------|------|------|
| snoRNA     | HBII-210                  | -0.46 | 5.47 | 1.28 | 0.26 | 0.80 |
| snoRNA     | U38A                      | -0.58 | 4.23 | 1.28 | 0.26 | 0.80 |
| snoRNA     | ACA51                     | 0.54  | 2.14 | 1.28 | 0.26 | 0.80 |
| snRNA      | U5-L133                   | -0.57 | 2.24 | 1.28 | 0.26 | 0.80 |
| scRNA      | HY3-L84                   | 0.31  | 6.39 | 1.27 | 0.26 | 0.80 |
| scRNA      | HY3-L492                  | 0.61  | 1.45 | 1.27 | 0.26 | 0.80 |
| mir-5p     | hsa-miR-146b-5p           | -0.27 | 7.71 | 1.27 | 0.26 | 0.80 |
| scRNA      | BC200-L164                | 0.54  | 2.30 | 1.26 | 0.26 | 0.80 |
| snoRNA     | HBII-295                  | -0.68 | 3.05 | 1.26 | 0.26 | 0.80 |
| tRF3       | chr3.tRNA10-PseudoCTC-tRF | 0.99  | 1.55 | 1.26 | 0.26 | 0.80 |
| snoRNA     | U36B                      | -0.85 | 1.73 | 1.26 | 0.26 | 0.80 |
| scRNA      | HY1-L239                  | 0.33  | 4.37 | 1.26 | 0.26 | 0.80 |
| mir-5p     | hsa-miR-330-5p            | 0.58  | 1.63 | 1.26 | 0.26 | 0.80 |
| snoRNA     | HBII-276                  | -0.58 | 3.49 | 1.25 | 0.26 | 0.80 |
| piRNA      | piR-60565-L9              | -0.61 | 1.88 | 1.25 | 0.26 | 0.80 |
| mir-3p     | hsa-miR-3613-3p           | 0.73  | 1.73 | 1.25 | 0.26 | 0.80 |
| tRNA       | chr2.tRNA27-GlyCCC        | -0.38 | 8.80 | 1.25 | 0.26 | 0.80 |
| snoRNA     | HBII-382                  | 0.79  | 2.17 | 1.24 | 0.26 | 0.80 |
| scRNA      | HY1-L226                  | 0.37  | 3.29 | 1.24 | 0.26 | 0.80 |
| tRNA       | chr1.tRNA117-GlyTCC       | 0.36  | 2.71 | 1.24 | 0.26 | 0.80 |
| scRNA      | BC200-L154                | 0.66  | 1.41 | 1.24 | 0.26 | 0.80 |
| rRNA       | LSU-rRNA_Hsa-L39          | 0.33  | 7.57 | 1.24 | 0.27 | 0.80 |
| rRNA       | 5S-L1014                  | -0.66 | 1.63 | 1.24 | 0.27 | 0.80 |
| scRNA      | HY3-L512                  | 0.83  | 2.06 | 1.23 | 0.27 | 0.80 |
| mir-5p     | hsa-miR-181b-5p-L2        | -0.26 | 6.05 | 1.23 | 0.27 | 0.80 |
| scRNA      | HY4-L136                  | -0.54 | 2.51 | 1.23 | 0.27 | 0.80 |
| rRNA       | LSU-rRNA_Hsa-L2           | 0.51  | 9.24 | 1.22 | 0.27 | 0.80 |
| scRNA      | HY4-L42                   | 0.60  | 1.44 | 1.22 | 0.27 | 0.80 |
| piRNA      | piR-33160                 | 0.55  | 1.68 | 1.22 | 0.27 | 0.80 |
| snRNA      | U2-L550                   | 0.78  | 2.12 | 1.21 | 0.27 | 0.80 |
| scRNA      | HY1-L149                  | 0.34  | 3.78 | 1.21 | 0.27 | 0.80 |
| mir-3p     | hsa-miR-181c-3p           | 0.59  | 1.57 | 1.21 | 0.27 | 0.80 |
| tRF5       | chr1.tRNA130-ValCAC-tRF5  | 0.51  | 2.38 | 1.21 | 0.27 | 0.80 |
| tRNA       | chr1.tRNA60-PseudoTAA     | -0.42 | 3.73 | 1.21 | 0.27 | 0.80 |
| tRNA       | chr16.tRNA7-LysCTT        | -0.61 | 2.24 | 1.21 | 0.27 | 0.80 |
| tRNA       | chr11.tRNA11-LysTTT       | 0.43  | 7.37 | 1.20 | 0.27 | 0.81 |
| scRNA      | BC200-L18                 | 0.49  | 3.08 | 1.20 | 0.27 | 0.81 |
| mir-5p3pno | hsa-miR-378f              | 0.44  | 1.69 | 1.17 | 0.28 | 0.82 |
| mir-3p     | hsa-miR-127-3p            | -0.45 | 5.07 | 1.16 | 0.28 | 0.82 |
| scRNA      | HY1-L174                  | 0.58  | 1.36 | 1.16 | 0.28 | 0.82 |
| mir-5p     | hsa-miR-503-5p            | -0.41 | 3.20 | 1.16 | 0.28 | 0.82 |
| mir-3p     | hsa-miR-4433-3p           | 0.47  | 2.78 | 1.15 | 0.28 | 0.82 |
| scRNA      | BC200-L129                | 0.63  | 2.19 | 1.15 | 0.28 | 0.82 |

|            |                             |       |       |      |      |      |
|------------|-----------------------------|-------|-------|------|------|------|
| snRNA      | U6-L1696                    | 0.72  | 1.91  | 1.15 | 0.28 | 0.82 |
| scRNA      | HY4-L109                    | 0.43  | 2.11  | 1.15 | 0.28 | 0.82 |
| tRNA       | chr14.tRNA7-ArgACG          | 0.54  | 1.75  | 1.15 | 0.28 | 0.82 |
| mir-5p     | hsa-let-7i-5p               | -0.21 | 12.19 | 1.14 | 0.29 | 0.82 |
| mir-5p3pno | hsa-miR-1294                | -0.71 | 1.62  | 1.14 | 0.29 | 0.82 |
| rRNA       | LSU-rRNA_Hsa-L144           | -0.62 | 1.61  | 1.14 | 0.29 | 0.82 |
| tRF5       | chr14.tRNA4-ThrTGT-tRF5     | 0.48  | 2.23  | 1.14 | 0.29 | 0.82 |
| mir-5p3pno | hsa-miR-5096                | -0.77 | 2.21  | 1.13 | 0.29 | 0.82 |
| piRNA      | piR-36743                   | -0.38 | 3.67  | 1.13 | 0.29 | 0.82 |
| snoRNA     | U55                         | -0.51 | 5.84  | 1.13 | 0.29 | 0.82 |
| snRNA      | U2-L532                     | 0.79  | 3.08  | 1.13 | 0.29 | 0.82 |
| snRNA      | U1-L33                      | -0.46 | 2.56  | 1.13 | 0.29 | 0.82 |
| scRNA      | BC200-L60                   | 0.54  | 2.38  | 1.12 | 0.29 | 0.82 |
| mir-3p     | hsa-miR-495-3p              | 0.54  | 2.88  | 1.12 | 0.29 | 0.82 |
| mir-3p     | hsa-let-7a-3p-L2            | 0.44  | 3.02  | 1.12 | 0.29 | 0.82 |
| tRNA       | chr6.tRNA4-ArgTCG           | -0.65 | 2.79  | 1.11 | 0.29 | 0.82 |
| scRNA      | HY4-L127                    | -0.25 | 11.00 | 1.11 | 0.29 | 0.82 |
| scRNA      | HY1-L277                    | 0.41  | 3.60  | 1.11 | 0.29 | 0.82 |
| scRNA      | BC200-L140                  | 0.24  | 7.01  | 1.10 | 0.29 | 0.82 |
| tRF5       | chr17.tRNA25-SeCTCA-tRF5    | -0.49 | 2.25  | 1.10 | 0.29 | 0.82 |
| scRNA      | BC200-L37                   | 0.27  | 6.33  | 1.10 | 0.29 | 0.82 |
| scRNA      | HY1-L133                    | 0.34  | 2.77  | 1.09 | 0.30 | 0.82 |
| scRNA      | BC200-L27                   | -0.51 | 2.97  | 1.09 | 0.30 | 0.82 |
| mir-5p     | hsa-miR-483-5p              | 0.45  | 4.02  | 1.09 | 0.30 | 0.82 |
| scRNA      | BC200-L23                   | 0.50  | 3.06  | 1.09 | 0.30 | 0.82 |
| rRNA       | LSU-rRNA_Hsa-L60            | -0.29 | 12.44 | 1.09 | 0.30 | 0.82 |
| mir-5p3pno | hsa-miR-378c                | -0.29 | 5.35  | 1.09 | 0.30 | 0.82 |
| scRNA      | BC200-L12                   | 0.78  | 1.72  | 1.09 | 0.30 | 0.82 |
| piRNA      | piR-36707                   | 0.37  | 5.03  | 1.08 | 0.30 | 0.82 |
| mir-3p     | hsa-miR-10a-3p              | 0.55  | 1.82  | 1.08 | 0.30 | 0.82 |
| tRF5       | chr1.tRNA104-PseudoGTT-tRF5 | 0.50  | 2.69  | 1.07 | 0.30 | 0.83 |
| mir-5p3pno | hsa-miR-206                 | -0.71 | 2.36  | 1.06 | 0.30 | 0.83 |
| snoRNA     | HBII-239                    | -0.38 | 4.71  | 1.06 | 0.30 | 0.83 |
| mir-5p3pno | hsa-miR-4485                | 0.44  | 4.29  | 1.06 | 0.30 | 0.83 |
| mir-5p     | hsa-let-7b-5p               | 0.18  | 12.45 | 1.06 | 0.30 | 0.83 |
| scRNA      | HY1-L121                    | 0.47  | 2.71  | 1.06 | 0.30 | 0.83 |
| snoRNA     | U20                         | -0.48 | 6.66  | 1.05 | 0.31 | 0.83 |
| scRNA      | HY1-L247                    | 0.57  | 1.49  | 1.05 | 0.31 | 0.83 |
| tRF5       | chr16.tRNA23-LysTTT-tRF5    | 0.49  | 3.56  | 1.05 | 0.31 | 0.83 |
| scRNA      | BC200-L62                   | 0.38  | 2.72  | 1.04 | 0.31 | 0.83 |
| snoRNA     | HBII-202                    | -0.51 | 6.44  | 1.04 | 0.31 | 0.83 |
| snRNA      | U5-L66                      | -0.32 | 6.99  | 1.04 | 0.31 | 0.83 |
| piRNA      | piR-36376                   | -0.39 | 2.64  | 1.03 | 0.31 | 0.83 |

|            |                          |       |       |      |      |      |
|------------|--------------------------|-------|-------|------|------|------|
| mir-5p     | hsa-miR-130b-5p          | 0.43  | 4.40  | 1.03 | 0.31 | 0.83 |
| rRNA       | SSU-rRNA_Hsa-L74         | -0.33 | 6.51  | 1.03 | 0.31 | 0.83 |
| mir-5p3pno | hsa-miR-548j             | -0.57 | 1.80  | 1.03 | 0.31 | 0.83 |
| snRNA      | U2-L288                  | -0.45 | 2.57  | 1.03 | 0.31 | 0.83 |
| piRNA      | piR-35548-L4             | 0.33  | 7.22  | 1.02 | 0.31 | 0.83 |
| rRNA       | LSU-rRNA_Hsa-L346        | -0.45 | 1.67  | 1.02 | 0.31 | 0.83 |
| rRNA       | 5S-L815                  | -0.40 | 2.57  | 1.02 | 0.31 | 0.83 |
| mir-5p     | hsa-miR-3184-5p          | 0.22  | 7.99  | 1.02 | 0.31 | 0.83 |
| snoRNA     | mgh18S-121               | -0.82 | 1.93  | 1.02 | 0.31 | 0.83 |
| mir-5p3pno | hsa-miR-4447             | 0.62  | 1.30  | 1.01 | 0.31 | 0.83 |
| snoRNA     | snR38C                   | -0.70 | 2.03  | 1.01 | 0.31 | 0.83 |
| rRNA       | LSU-rRNA_Hsa-L230        | -0.34 | 3.37  | 1.01 | 0.32 | 0.83 |
| snoRNA     | U52                      | -0.50 | 2.73  | 1.00 | 0.32 | 0.83 |
| mir-3p     | hsa-miR-23b-3p           | -0.39 | 3.56  | 1.00 | 0.32 | 0.83 |
| scRNA      | BC200-L38                | 0.82  | 1.58  | 0.99 | 0.32 | 0.83 |
| rRNA       | LSU-rRNA_Hsa-L188        | -0.55 | 1.82  | 0.99 | 0.32 | 0.83 |
| snoRNA     | U42B                     | -0.62 | 4.22  | 0.99 | 0.32 | 0.83 |
| rRNA       | SSU-rRNA_Hsa-L67         | -0.51 | 3.08  | 0.99 | 0.32 | 0.83 |
| scRNA      | BC200-L95                | 0.44  | 3.20  | 0.99 | 0.32 | 0.83 |
| scRNA      | BC200-L24                | -0.48 | 2.86  | 0.99 | 0.32 | 0.83 |
| tRF3       | chr2.tRNA21-SerTGA-tRF3  | 0.55  | 2.33  | 0.98 | 0.32 | 0.83 |
| scRNA      | HY1-L111                 | 0.50  | 1.94  | 0.98 | 0.32 | 0.83 |
| piRNA      | piR-33151-L12            | -0.33 | 2.94  | 0.97 | 0.32 | 0.83 |
| tRF3       | chr14.tRNA10-IleAAT-tRF3 | 0.58  | 2.47  | 0.97 | 0.32 | 0.83 |
| scRNA      | HY4-L34                  | 0.48  | 1.71  | 0.97 | 0.32 | 0.83 |
| mir-3p     | hsa-miR-1307-3p          | -0.25 | 7.96  | 0.97 | 0.33 | 0.83 |
| mir-3p     | hsa-miR-99b-3p           | -0.36 | 3.53  | 0.96 | 0.33 | 0.84 |
| tRNA       | chr6.tRNA66-AlaTGC       | 0.50  | 1.95  | 0.95 | 0.33 | 0.84 |
| snoRNA     | U36A                     | -0.79 | 1.72  | 0.95 | 0.33 | 0.84 |
| piRNA      | piR-30112                | -0.55 | 2.68  | 0.93 | 0.33 | 0.85 |
| mir-5p     | hsa-let-7d-5p            | 0.23  | 8.11  | 0.93 | 0.33 | 0.85 |
| piRNA      | piR-37213                | 0.70  | 1.60  | 0.93 | 0.33 | 0.85 |
| rRNA       | LSU-rRNA_Hsa-L109        | 0.55  | 1.47  | 0.93 | 0.34 | 0.85 |
| snoRNA     | U97                      | 0.69  | 1.93  | 0.92 | 0.34 | 0.85 |
| snoRNA     | U101                     | -0.46 | 5.22  | 0.92 | 0.34 | 0.85 |
| mir-3p     | hsa-miR-92b-3p           | 0.26  | 4.74  | 0.92 | 0.34 | 0.85 |
| snRNA      | U3-L205                  | -0.28 | 4.79  | 0.92 | 0.34 | 0.85 |
| scRNA      | HY1-L67                  | 0.27  | 6.00  | 0.91 | 0.34 | 0.85 |
| snoRNA     | U44                      | -0.39 | 6.36  | 0.89 | 0.34 | 0.86 |
| rRNA       | LSU-rRNA_Hsa-L350        | 0.22  | 10.47 | 0.89 | 0.35 | 0.86 |
| rRNA       | 5S-L688                  | 0.35  | 4.43  | 0.89 | 0.35 | 0.86 |
| rRNA       | SSU-rRNA_Hsa-L3          | 0.52  | 1.28  | 0.89 | 0.35 | 0.86 |
| snoRNA     | U73a                     | -0.69 | 1.79  | 0.89 | 0.35 | 0.86 |

|            |                          |       |       |      |      |      |
|------------|--------------------------|-------|-------|------|------|------|
| tRNA       | chr1.tRNA4-GlyCCC        | -0.30 | 5.56  | 0.89 | 0.35 | 0.86 |
| rRNA       | SSU-rRNA_Hsa-L73         | 0.20  | 14.22 | 0.88 | 0.35 | 0.86 |
| mir-5p3pno | hsa-miR-320d-L2          | 0.32  | 3.63  | 0.88 | 0.35 | 0.86 |
| tRNA       | chr2.tRNA25-PseudoCTC    | -0.21 | 8.69  | 0.88 | 0.35 | 0.86 |
| snoRNA     | HBII-99                  | -0.45 | 4.91  | 0.87 | 0.35 | 0.86 |
| mir-5p     | hsa-miR-125a-5p          | 0.33  | 4.98  | 0.87 | 0.35 | 0.87 |
| mir-5p     | hsa-miR-28-5p            | -0.27 | 5.11  | 0.87 | 0.35 | 0.87 |
| piRNA      | piR-52416                | 0.83  | 1.72  | 0.86 | 0.35 | 0.87 |
| piRNA      | piR-36170                | 0.55  | 2.57  | 0.86 | 0.35 | 0.87 |
| snRNA      | U5-L22                   | 0.68  | 1.98  | 0.86 | 0.35 | 0.87 |
| scRNA      | HY4-L11                  | -0.66 | 1.48  | 0.85 | 0.36 | 0.87 |
| tRF5       | chr17.tRNA26-CysGCA-tRF5 | 0.28  | 5.39  | 0.85 | 0.36 | 0.87 |
| rRNA       | 5S-L356                  | 0.26  | 5.32  | 0.85 | 0.36 | 0.87 |
| mir-3p     | hsa-miR-191-3p           | -0.47 | 1.89  | 0.84 | 0.36 | 0.87 |
| tRNA       | chr16.tRNA4-ProAGG       | 0.37  | 2.50  | 0.84 | 0.36 | 0.87 |
| rRNA       | SSU-rRNA_Hsa-L80         | -0.29 | 6.73  | 0.84 | 0.36 | 0.87 |
| scRNA      | HY5-L8                   | 0.35  | 3.89  | 0.84 | 0.36 | 0.87 |
| snRNA      | U2-L386                  | 0.60  | 2.89  | 0.84 | 0.36 | 0.87 |
| rRNA       | LSU-rRNA_Hsa-L384        | 0.20  | 14.09 | 0.84 | 0.36 | 0.87 |
| tRNA       | chr14.tRNA2-LeuTAG       | 0.54  | 2.26  | 0.84 | 0.36 | 0.87 |
| tRNA       | chr1.tRNA64-GluTTC       | -0.20 | 7.89  | 0.83 | 0.36 | 0.87 |
| scRNA      | BC200-L120               | 0.47  | 1.92  | 0.83 | 0.36 | 0.87 |
| mir-3p     | hsa-miR-29a-3p           | -0.24 | 5.96  | 0.83 | 0.36 | 0.87 |
| scRNA      | HY3-L518                 | 0.19  | 8.30  | 0.83 | 0.36 | 0.87 |
| tRNA       | chr6.tRNA77-GluCTC       | 0.33  | 4.25  | 0.82 | 0.36 | 0.87 |
| mir-3p     | hsa-miR-151a-3p          | -0.25 | 11.62 | 0.82 | 0.36 | 0.87 |
| scRNA      | HY4-L152                 | 0.27  | 7.32  | 0.82 | 0.36 | 0.87 |
| snRNA      | U4-L41                   | -0.51 | 2.29  | 0.82 | 0.37 | 0.87 |
| mir-3p     | hsa-miR-671-3p           | 0.31  | 4.05  | 0.82 | 0.37 | 0.87 |
| scRNA      | HY3-L272                 | 0.49  | 1.38  | 0.81 | 0.37 | 0.87 |
| mir-5p     | hsa-miR-411-5p           | 0.48  | 2.70  | 0.81 | 0.37 | 0.87 |
| mir-5p3pno | hsa-miR-326              | -0.41 | 1.98  | 0.81 | 0.37 | 0.87 |
| mir-3p     | hsa-miR-4742-3p          | 0.70  | 1.43  | 0.80 | 0.37 | 0.87 |
| scRNA      | HY1-L45                  | -0.47 | 1.90  | 0.80 | 0.37 | 0.87 |
| tRNA       | chr19.tRNA13-ValCAC      | -0.29 | 4.33  | 0.80 | 0.37 | 0.87 |
| rRNA       | LSU-rRNA_Hsa-L43         | 0.43  | 1.53  | 0.80 | 0.37 | 0.87 |
| rRNA       | LSU-rRNA_Hsa-L200        | 0.36  | 2.74  | 0.80 | 0.37 | 0.87 |
| scRNA      | HY1-L183                 | 0.32  | 2.44  | 0.80 | 0.37 | 0.87 |
| mir-3p     | hsa-miR-652-3p           | -0.27 | 3.92  | 0.80 | 0.37 | 0.87 |
| snRNA      | U3-L74                   | -0.55 | 2.45  | 0.79 | 0.37 | 0.87 |
| snoRNA     | HBII-82B                 | 0.62  | 2.38  | 0.79 | 0.37 | 0.87 |
| tRNA       | chr6.tRNA84-GlnTTG       | 0.58  | 1.52  | 0.78 | 0.38 | 0.87 |
| snoRNA     | U90                      | -0.60 | 2.75  | 0.78 | 0.38 | 0.87 |

|            |                         |       |       |      |      |      |
|------------|-------------------------|-------|-------|------|------|------|
| mir-5p     | hsa-miR-10a-5p          | -0.23 | 8.93  | 0.78 | 0.38 | 0.87 |
| snoRNA     | U29                     | -0.43 | 5.29  | 0.77 | 0.38 | 0.87 |
| snRNA      | U2-L887                 | 0.35  | 6.33  | 0.77 | 0.38 | 0.87 |
| rRNA       | LSU-rRNA_Hsa-L102       | 0.37  | 3.17  | 0.77 | 0.38 | 0.87 |
| tRF3       | chr22.tRNA1-SeCTCA-tRF3 | 0.44  | 4.56  | 0.77 | 0.38 | 0.87 |
| mir-3p     | hsa-miR-3605-3p         | 0.51  | 2.12  | 0.77 | 0.38 | 0.87 |
| rRNA       | 5S-L472                 | 0.39  | 2.70  | 0.77 | 0.38 | 0.87 |
| scRNA      | HY3-L432                | 0.42  | 1.48  | 0.77 | 0.38 | 0.87 |
| rRNA       | LSU-rRNA_Hsa-L275       | 0.33  | 5.54  | 0.76 | 0.38 | 0.88 |
| scRNA      | BC200-L69               | 0.53  | 1.43  | 0.76 | 0.38 | 0.88 |
| snoRNA     | U15A                    | -0.57 | 2.09  | 0.75 | 0.39 | 0.88 |
| snoRNA     | HBII-316                | -0.68 | 2.03  | 0.75 | 0.39 | 0.88 |
| tRNA       | chr6.tRNA6-ArgACG       | 0.42  | 2.65  | 0.74 | 0.39 | 0.88 |
| snRNA      | U17                     | 0.56  | 1.81  | 0.74 | 0.39 | 0.88 |
| rRNA       | LSU-rRNA_Hsa-L58        | -0.24 | 7.02  | 0.74 | 0.39 | 0.88 |
| mir-5p     | hsa-miR-877-5p          | 0.41  | 2.35  | 0.74 | 0.39 | 0.88 |
| rRNA       | 5S-L1009                | 0.45  | 2.50  | 0.74 | 0.39 | 0.88 |
| rRNA       | LSU-rRNA_Hsa-L198       | -0.21 | 7.74  | 0.74 | 0.39 | 0.88 |
| scRNA      | HY4-L114                | -0.39 | 2.44  | 0.74 | 0.39 | 0.88 |
| rRNA       | LSU-rRNA_Hsa-L48        | 0.52  | 1.64  | 0.73 | 0.39 | 0.88 |
| scRNA      | HY4-L92                 | 0.47  | 1.42  | 0.73 | 0.39 | 0.88 |
| snRNA      | U2-L615                 | 0.57  | 13.00 | 0.73 | 0.39 | 0.88 |
| tRNA       | chr17.tRNA3-GlnCTG      | 0.21  | 6.70  | 0.73 | 0.39 | 0.88 |
| scRNA      | HY4-L130                | 0.18  | 14.43 | 0.73 | 0.39 | 0.88 |
| snoRNA     | U8-L17                  | -0.46 | 2.67  | 0.73 | 0.39 | 0.88 |
| scRNA      | HY4-L93                 | 0.24  | 3.97  | 0.72 | 0.39 | 0.88 |
| scRNA      | HY1-L442                | -0.50 | 1.33  | 0.72 | 0.40 | 0.88 |
| snRNA      | U2-L302                 | 0.35  | 4.05  | 0.72 | 0.40 | 0.88 |
| mir-5p     | hsa-miR-96-5p           | 0.50  | 2.19  | 0.71 | 0.40 | 0.88 |
| tRNA       | chr1.tRNA119-LysCTT     | -0.22 | 7.12  | 0.71 | 0.40 | 0.88 |
| rRNA       | 5S-L1129                | -0.41 | 1.90  | 0.71 | 0.40 | 0.88 |
| piRNA      | piR-49144               | -0.19 | 7.05  | 0.71 | 0.40 | 0.88 |
| snoRNA     | HBI-61                  | 0.64  | 3.49  | 0.71 | 0.40 | 0.88 |
| mir-3p     | hsa-miR-708-3p          | -0.62 | 1.52  | 0.70 | 0.40 | 0.88 |
| piRNA      | piR-43325-L2            | -0.47 | 2.34  | 0.70 | 0.40 | 0.88 |
| rRNA       | LSU-rRNA_Hsa-L161       | 0.40  | 1.84  | 0.70 | 0.40 | 0.88 |
| scRNA      | BC200-L19               | -0.59 | 1.37  | 0.70 | 0.40 | 0.88 |
| piRNA      | piR-61298               | 0.71  | 1.91  | 0.70 | 0.40 | 0.88 |
| tRF5       | chr20.tRNA6-LeuAAG-tRF5 | -0.33 | 3.01  | 0.70 | 0.40 | 0.88 |
| rRNA       | 5S-L1071                | -0.39 | 1.54  | 0.70 | 0.40 | 0.88 |
| scRNA      | HY1-L302                | -0.30 | 2.49  | 0.69 | 0.41 | 0.88 |
| mir-5p3pno | hsa-miR-107             | 0.43  | 1.72  | 0.69 | 0.41 | 0.88 |
| rRNA       | 5S-L758                 | -0.36 | 2.59  | 0.69 | 0.41 | 0.88 |

|            |                           |       |      |      |      |      |
|------------|---------------------------|-------|------|------|------|------|
| rRNA       | LSU-rRNA_Hsa-L73          | -0.39 | 2.19 | 0.69 | 0.41 | 0.88 |
| snoRNA     | U103B                     | -0.48 | 3.29 | 0.69 | 0.41 | 0.88 |
| rRNA       | LSU-rRNA_Hsa-L341         | 0.45  | 1.93 | 0.69 | 0.41 | 0.88 |
| mir-5p     | hsa-miR-454-5p            | -0.33 | 2.36 | 0.69 | 0.41 | 0.88 |
| mir-3p     | hsa-miR-323b-3p           | 0.39  | 3.62 | 0.68 | 0.41 | 0.88 |
| rRNA       | LSU-rRNA_Hsa-L308         | -0.52 | 1.76 | 0.68 | 0.41 | 0.88 |
| tRNA       | chr1.tRNA54-LysTTT        | -0.23 | 8.24 | 0.68 | 0.41 | 0.88 |
| scRNA      | HY1-L212                  | 0.34  | 2.69 | 0.68 | 0.41 | 0.88 |
| tRNA       | chr12.tRNA5-AspGTC        | 0.29  | 4.66 | 0.68 | 0.41 | 0.88 |
| tRF5       | chr1.tRNA109-PseudoGTT-tF | 0.49  | 1.70 | 0.68 | 0.41 | 0.88 |
| tRNA       | chr1.tRNA18-PseudoCCT     | 0.49  | 1.66 | 0.67 | 0.41 | 0.88 |
| piRNA      | piR-36499                 | 0.41  | 1.68 | 0.67 | 0.41 | 0.88 |
| rRNA       | 5S-L189                   | 0.40  | 2.24 | 0.67 | 0.41 | 0.88 |
| tRNA       | chr6.tRNA129-MetCAT       | -0.31 | 5.33 | 0.67 | 0.41 | 0.88 |
| snRNA      | U1-L47                    | 0.39  | 1.98 | 0.67 | 0.41 | 0.88 |
| tRNA       | chr13.tRNA2-PseudoCTC     | -0.21 | 4.77 | 0.67 | 0.41 | 0.88 |
| mir-3p     | hsa-miR-1273g-3p          | 0.22  | 5.83 | 0.66 | 0.41 | 0.88 |
| piRNA      | piR-38600                 | 0.40  | 3.94 | 0.66 | 0.42 | 0.88 |
| snRNA      | U2-L1001                  | 0.40  | 2.25 | 0.65 | 0.42 | 0.89 |
| mir-3p     | hsa-miR-411-3p            | -0.58 | 1.75 | 0.65 | 0.42 | 0.89 |
| rRNA       | 5S-L1144                  | -0.45 | 1.38 | 0.64 | 0.42 | 0.89 |
| scRNA      | HY1-L419                  | 0.24  | 3.95 | 0.64 | 0.42 | 0.89 |
| mir-5p     | hsa-miR-625-5p            | -0.42 | 2.07 | 0.64 | 0.42 | 0.89 |
| tRNA       | chr2.tRNA6-GluTTC         | -0.22 | 4.09 | 0.64 | 0.42 | 0.89 |
| mir-5p     | hsa-miR-3614-5p           | -0.44 | 1.91 | 0.63 | 0.43 | 0.89 |
| mir-5p     | hsa-let-7f-5p-L2          | -0.19 | 6.10 | 0.63 | 0.43 | 0.89 |
| mir-3p     | hsa-miR-493-3p            | -0.38 | 3.21 | 0.63 | 0.43 | 0.89 |
| mir-5p3pno | hsa-miR-421               | -0.29 | 2.77 | 0.63 | 0.43 | 0.89 |
| mir-5p3pno | hsa-miR-6073              | -0.50 | 1.46 | 0.63 | 0.43 | 0.89 |
| rRNA       | SSU-rRNA_Hsa-L46          | -0.30 | 6.10 | 0.63 | 0.43 | 0.89 |
| rRNA       | 5S-L191                   | 0.25  | 4.70 | 0.62 | 0.43 | 0.90 |
| snoRNA     | ACA44                     | -0.52 | 2.30 | 0.62 | 0.43 | 0.90 |
| piRNA      | piR-44716                 | 1.46  | 4.74 | 0.61 | 0.43 | 0.90 |
| scRNA      | HY3-L142                  | -0.52 | 1.70 | 0.61 | 0.43 | 0.90 |
| rRNA       | LSU-rRNA_Hsa-L221         | -0.35 | 2.74 | 0.61 | 0.43 | 0.90 |
| mir-5p3pno | hsa-miR-494               | -0.50 | 1.75 | 0.61 | 0.43 | 0.90 |
| mir-5p     | hsa-miR-1304-5p           | -0.46 | 1.47 | 0.61 | 0.43 | 0.90 |
| rRNA       | 5S-L317                   | 0.49  | 1.26 | 0.61 | 0.44 | 0.90 |
| tRNA       | chr16.tRNA16-LeuAAG       | -0.32 | 3.29 | 0.61 | 0.44 | 0.90 |
| mir-5p     | hsa-miR-30c-5p            | 0.18  | 6.46 | 0.60 | 0.44 | 0.90 |
| tRNA       | chr2.tRNA1-PseudoCCC      | -0.20 | 5.86 | 0.60 | 0.44 | 0.90 |
| scRNA      | HY4-L122                  | -0.16 | 7.82 | 0.60 | 0.44 | 0.90 |
| mir-3p     | hsa-miR-3177-3p           | 0.42  | 1.68 | 0.59 | 0.44 | 0.91 |



|            |                         |       |       |      |      |      |
|------------|-------------------------|-------|-------|------|------|------|
| snRNA      | U2-L161                 | 0.38  | 12.39 | 0.59 | 0.44 | 0.91 |
| rRNA       | LSU-rRNA_Hsa-L380       | 0.18  | 13.98 | 0.59 | 0.44 | 0.91 |
| snoRNA     | U50B                    | -0.36 | 4.34  | 0.59 | 0.44 | 0.91 |
| rRNA       | 5S-L983                 | -0.33 | 1.77  | 0.58 | 0.44 | 0.91 |
| scRNA      | HY3-L199                | 0.34  | 1.72  | 0.58 | 0.45 | 0.91 |
| snRNA      | U2-L537                 | 0.54  | 2.76  | 0.58 | 0.45 | 0.91 |
| rRNA       | 5S-L1114                | 0.35  | 1.68  | 0.58 | 0.45 | 0.91 |
| mir-5p     | hsa-miR-146a-5p         | -0.19 | 9.39  | 0.57 | 0.45 | 0.91 |
| mir-5p     | hsa-miR-450b-5p         | -0.24 | 5.25  | 0.57 | 0.45 | 0.91 |
| scRNA      | BC200-L31               | 0.51  | 1.42  | 0.57 | 0.45 | 0.91 |
| mir-5p     | hsa-miR-32-5p           | -0.27 | 3.62  | 0.57 | 0.45 | 0.91 |
| snoRNA     | U22                     | -0.42 | 3.81  | 0.57 | 0.45 | 0.91 |
| rRNA       | 5S-L108                 | -0.17 | 11.53 | 0.57 | 0.45 | 0.91 |
| mir-5p     | hsa-miR-409-5p          | -0.59 | 1.55  | 0.57 | 0.45 | 0.91 |
| tRNA       | chr6.tRNA86-PseudoTAC   | -0.44 | 2.07  | 0.57 | 0.45 | 0.91 |
| snoRNA     | U42A                    | -0.45 | 4.44  | 0.56 | 0.45 | 0.91 |
| scRNA      | BC200-L73               | -0.37 | 2.27  | 0.56 | 0.45 | 0.91 |
| snoRNA     | U87                     | -0.56 | 1.65  | 0.56 | 0.45 | 0.91 |
| rRNA       | LSU-rRNA_Hsa-L212       | -0.24 | 3.25  | 0.56 | 0.45 | 0.91 |
| scRNA      | HY4-L44                 | 0.34  | 1.59  | 0.56 | 0.46 | 0.91 |
| tRNA       | chr17.tRNA15-CysGCA     | -0.20 | 6.11  | 0.56 | 0.46 | 0.91 |
| scRNA      | HY1-L393                | -0.37 | 1.73  | 0.56 | 0.46 | 0.91 |
| mir-5p3pno | hsa-miR-548e            | -0.33 | 2.60  | 0.55 | 0.46 | 0.91 |
| mir-3p     | hsa-miR-15b-3p          | -0.30 | 3.61  | 0.55 | 0.46 | 0.91 |
| snRNA      | U2-L765                 | 0.37  | 2.07  | 0.55 | 0.46 | 0.91 |
| rRNA       | LSU-rRNA_Hsa-L64        | -0.42 | 1.52  | 0.55 | 0.46 | 0.91 |
| mir-5p3pno | hsa-miR-410             | -0.54 | 1.74  | 0.55 | 0.46 | 0.91 |
| tRNA       | chr16.tRNA22-MetCAT     | 0.33  | 3.03  | 0.55 | 0.46 | 0.91 |
| tRF3       | chr10.tRNA2-SerTGA-tRF3 | 0.44  | 2.00  | 0.55 | 0.46 | 0.91 |
| mir-5p3pno | hsa-miR-378d-L2         | 0.40  | 1.37  | 0.54 | 0.46 | 0.91 |
| piRNA      | piR-61646-L2            | -0.23 | 8.65  | 0.54 | 0.46 | 0.91 |
| tRNA       | chr3.tRNA10-PseudoCTC   | 0.16  | 7.60  | 0.54 | 0.46 | 0.91 |
| snoRNA     | U79                     | -0.51 | 1.72  | 0.54 | 0.46 | 0.91 |
| rRNA       | 5S-L111                 | -0.16 | 10.31 | 0.53 | 0.46 | 0.91 |
| piRNA      | piR-52041               | -0.37 | 1.91  | 0.53 | 0.47 | 0.91 |
| piRNA      | piR-61647-L4            | 0.25  | 3.62  | 0.53 | 0.47 | 0.91 |
| mir-5p3pno | hsa-miR-370             | -0.35 | 4.87  | 0.53 | 0.47 | 0.91 |
| snRNA      | U3-L79                  | 0.35  | 3.27  | 0.53 | 0.47 | 0.91 |
| mir-5p     | hsa-miR-452-5p          | -0.46 | 1.74  | 0.53 | 0.47 | 0.91 |
| scRNA      | HY4-L149                | 0.36  | 1.76  | 0.52 | 0.47 | 0.91 |
| scRNA      | HY4-L146                | -0.36 | 1.61  | 0.52 | 0.47 | 0.91 |
| scRNA      | HY1-L321                | -0.19 | 4.61  | 0.51 | 0.47 | 0.92 |
| scRNA      | HY4-L49                 | -0.38 | 1.27  | 0.50 | 0.48 | 0.92 |

|            |                            |       |       |      |      |      |
|------------|----------------------------|-------|-------|------|------|------|
| tRF5       | chrX.tRNA1-PseudoTTG-tRF5  | -0.33 | 2.77  | 0.50 | 0.48 | 0.92 |
| snoRNA     | U63                        | -0.29 | 5.92  | 0.50 | 0.48 | 0.92 |
| rRNA       | SSU-rRNA_Hsa-L50           | -0.29 | 4.47  | 0.50 | 0.48 | 0.92 |
| snoRNA     | U76                        | -0.47 | 2.36  | 0.50 | 0.48 | 0.92 |
| snRNA      | U6-L440                    | 0.46  | 1.97  | 0.50 | 0.48 | 0.92 |
| snRNA      | U2-L285                    | 0.40  | 2.96  | 0.50 | 0.48 | 0.92 |
| mir-5p     | hsa-miR-486-5p             | -0.18 | 13.44 | 0.49 | 0.48 | 0.92 |
| mir-5p3pno | hsa-miR-1976               | 0.34  | 1.89  | 0.49 | 0.48 | 0.92 |
| mir-5p     | hsa-miR-450a-5p            | -0.33 | 3.31  | 0.49 | 0.48 | 0.92 |
| tRNA       | chr6.tRNA133-ValCAC        | -0.26 | 2.93  | 0.49 | 0.48 | 0.92 |
| tRNA       | chr16.tRNA17-LeuCAG        | -0.25 | 3.37  | 0.49 | 0.49 | 0.92 |
| tRNA       | chr5.tRNA14-ProTGG         | 0.22  | 4.85  | 0.49 | 0.49 | 0.92 |
| rRNA       | 5S-L955                    | -0.35 | 1.52  | 0.49 | 0.49 | 0.92 |
| rRNA       | 5S-L1270                   | 0.37  | 1.27  | 0.48 | 0.49 | 0.92 |
| mir-5p     | hsa-miR-122-5p             | -0.31 | 9.88  | 0.48 | 0.49 | 0.92 |
| tRF5       | chr20.tRNA7-PseudoCTC-tRF5 | 0.43  | 1.39  | 0.48 | 0.49 | 0.92 |
| mir-5p     | hsa-miR-7-5p-L3            | 0.41  | 1.44  | 0.48 | 0.49 | 0.92 |
| mir-5p     | hsa-miR-5010-5p            | -0.46 | 1.44  | 0.48 | 0.49 | 0.92 |
| mir-5p     | hsa-miR-155-5p             | -0.17 | 4.35  | 0.48 | 0.49 | 0.92 |
| scRNA      | BC200-L108                 | 0.35  | 2.02  | 0.48 | 0.49 | 0.92 |
| scRNA      | HY4-L103                   | 0.25  | 4.44  | 0.47 | 0.49 | 0.92 |
| mir-3p     | hsa-miR-30d-3p             | -0.36 | 1.67  | 0.47 | 0.49 | 0.92 |
| tRNA       | chr17.tRNA31-AsnGTT        | 0.29  | 2.61  | 0.47 | 0.49 | 0.92 |
| mir-5p3pno | hsa-miR-320b               | 0.18  | 4.99  | 0.47 | 0.49 | 0.92 |
| snoRNA     | ACA21                      | -0.36 | 2.76  | 0.46 | 0.50 | 0.92 |
| snoRNA     | U93                        | 0.53  | 1.72  | 0.46 | 0.50 | 0.92 |
| piRNA      | piR-32950                  | 0.20  | 6.31  | 0.46 | 0.50 | 0.92 |
| mir-5p     | hsa-let-7g-5p              | -0.17 | 11.06 | 0.46 | 0.50 | 0.92 |
| snRNA      | U2-L825                    | -0.40 | 3.19  | 0.46 | 0.50 | 0.93 |
| rRNA       | 5S-L101                    | 0.17  | 9.06  | 0.46 | 0.50 | 0.93 |
| rRNA       | 5S-L1143                   | 0.39  | 1.64  | 0.46 | 0.50 | 0.93 |
| mir-5p     | hsa-miR-424-5p             | -0.33 | 2.86  | 0.45 | 0.50 | 0.93 |
| snoRNA     | U58C                       | -0.39 | 3.37  | 0.45 | 0.50 | 0.93 |
| snoRNA     | ACA36B                     | -0.20 | 3.83  | 0.45 | 0.50 | 0.93 |
| scRNA      | HY3-L177                   | -0.36 | 1.55  | 0.45 | 0.50 | 0.93 |
| snoRNA     | SNORD119                   | -0.32 | 5.61  | 0.45 | 0.50 | 0.93 |
| rRNA       | 5S-L107                    | -0.17 | 10.07 | 0.45 | 0.50 | 0.93 |
| scRNA      | HY1-L326                   | 0.41  | 1.43  | 0.45 | 0.50 | 0.93 |
| snRNA      | U6-L9                      | 0.27  | 4.67  | 0.44 | 0.51 | 0.93 |
| mir-3p     | hsa-miR-146b-3p            | 0.31  | 2.42  | 0.44 | 0.51 | 0.93 |
| piRNA      | piR-35982-L11              | -0.58 | 1.95  | 0.44 | 0.51 | 0.93 |
| scRNA      | HY1-L356                   | 0.21  | 4.04  | 0.44 | 0.51 | 0.93 |
| rRNA       | LSU-rRNA_Hsa-L202          | -0.24 | 3.79  | 0.44 | 0.51 | 0.93 |

|            |                     |       |       |      |      |      |
|------------|---------------------|-------|-------|------|------|------|
| mir-5p3pno | hsa-miR-1287        | -0.47 | 1.87  | 0.44 | 0.51 | 0.93 |
| scRNA      | HY4-L32             | 0.20  | 3.65  | 0.44 | 0.51 | 0.93 |
| rRNA       | 5S-L578             | 0.35  | 2.37  | 0.44 | 0.51 | 0.93 |
| snoRNA     | U45C                | -0.36 | 2.62  | 0.44 | 0.51 | 0.93 |
| tRNA       | chr14.tRNA3-ProTGG  | -0.25 | 3.97  | 0.44 | 0.51 | 0.93 |
| piRNA      | piR-35468           | 0.30  | 4.14  | 0.44 | 0.51 | 0.93 |
| rRNA       | LSU-rRNA_Hsa-L214   | -0.57 | 2.13  | 0.43 | 0.51 | 0.93 |
| mir-3p     | hsa-miR-222-3p      | 0.18  | 8.33  | 0.43 | 0.51 | 0.93 |
| scRNA      | HY1-L10             | 0.34  | 1.55  | 0.43 | 0.51 | 0.93 |
| scRNA      | BC200-L10           | 0.31  | 2.65  | 0.43 | 0.51 | 0.93 |
| mir-3p     | hsa-miR-486-3p      | -0.18 | 10.93 | 0.43 | 0.51 | 0.93 |
| snRNA      | U14-L3              | 0.47  | 1.49  | 0.43 | 0.51 | 0.93 |
| mir-3p     | hsa-miR-1185-1-3p   | 0.40  | 2.25  | 0.42 | 0.52 | 0.93 |
| mir-5p     | hsa-miR-10b-5p      | -0.17 | 10.26 | 0.42 | 0.52 | 0.93 |
| tRNA       | chr2.tRNA2-TyrGTA   | -0.40 | 1.69  | 0.42 | 0.52 | 0.93 |
| tRNA       | chr17.tRNA36-ThrAGT | 0.33  | 2.02  | 0.42 | 0.52 | 0.93 |
| rRNA       | LSU-rRNA_Hsa-L388   | 0.14  | 10.79 | 0.42 | 0.52 | 0.93 |
| scRNA      | HY4-L151            | -0.25 | 2.39  | 0.42 | 0.52 | 0.93 |
| scRNA      | HY4-L81             | 0.22  | 3.17  | 0.42 | 0.52 | 0.93 |
| mir-5p     | hsa-miR-382-5p      | -0.23 | 5.88  | 0.41 | 0.52 | 0.93 |
| mir-3p     | hsa-miR-27a-3p      | -0.14 | 10.82 | 0.41 | 0.52 | 0.93 |
| scRNA      | HY4-L154            | -0.37 | 1.53  | 0.41 | 0.52 | 0.93 |
| piRNA      | piR-44984-L6        | 0.30  | 2.42  | 0.41 | 0.52 | 0.93 |
| mir-5p3pno | hsa-miR-548k        | 0.36  | 1.89  | 0.41 | 0.52 | 0.93 |
| scRNA      | BC200-L85           | 0.35  | 1.96  | 0.41 | 0.52 | 0.93 |
| tRNA       | chr6.tRNA157-ValCAC | -0.39 | 1.40  | 0.41 | 0.52 | 0.93 |
| rRNA       | 5S-L782             | 0.20  | 3.63  | 0.41 | 0.52 | 0.93 |
| mir-5p     | hsa-miR-21-5p       | -0.13 | 13.59 | 0.41 | 0.52 | 0.93 |
| snRNA      | U1-L8               | 0.25  | 6.14  | 0.40 | 0.52 | 0.93 |
| snoRNA     | ACA16               | -0.32 | 2.80  | 0.40 | 0.53 | 0.93 |
| piRNA      | piR-61648           | 0.24  | 2.28  | 0.40 | 0.53 | 0.93 |
| snoRNA     | HBII-82             | -0.57 | 2.14  | 0.40 | 0.53 | 0.93 |
| rRNA       | LSU-rRNA_Hsa-L164   | -0.17 | 5.97  | 0.40 | 0.53 | 0.93 |
| rRNA       | LSU-rRNA_Hsa-L53    | -0.27 | 2.22  | 0.40 | 0.53 | 0.93 |
| mir-5p     | hsa-miR-369-5p      | 0.59  | 1.73  | 0.40 | 0.53 | 0.93 |
| rRNA       | 5S-L586             | -0.27 | 2.14  | 0.40 | 0.53 | 0.93 |
| scRNA      | HY4-L68             | 0.17  | 4.03  | 0.39 | 0.53 | 0.93 |
| rRNA       | 5S-L1068            | -0.22 | 2.39  | 0.39 | 0.53 | 0.93 |
| scRNA      | BC200-L138          | 0.22  | 4.89  | 0.39 | 0.53 | 0.93 |
| rRNA       | LSU-rRNA_Hsa-L151   | -0.26 | 3.13  | 0.39 | 0.53 | 0.93 |
| scRNA      | HY4-L112            | 0.17  | 3.97  | 0.39 | 0.53 | 0.93 |
| rRNA       | 5S-L762             | -0.17 | 4.86  | 0.39 | 0.53 | 0.93 |
| mir-5p     | hsa-miR-186-5p      | -0.18 | 6.23  | 0.38 | 0.54 | 0.93 |

|            |                            |       |       |      |      |      |
|------------|----------------------------|-------|-------|------|------|------|
| rRNA       | LSU-rRNA_Hsa-L333          | 0.21  | 4.08  | 0.38 | 0.54 | 0.93 |
| piRNA      | piR-31115-L2               | 0.15  | 6.67  | 0.38 | 0.54 | 0.93 |
| snoRNA     | U18C                       | -0.48 | 1.82  | 0.38 | 0.54 | 0.93 |
| scRNA      | HY1-L124                   | -0.30 | 1.84  | 0.38 | 0.54 | 0.93 |
| rRNA       | LSU-rRNA_Hsa-L130          | -0.36 | 4.63  | 0.38 | 0.54 | 0.93 |
| mir-3p     | hsa-miR-500a-3p            | -0.21 | 3.32  | 0.38 | 0.54 | 0.93 |
| mir-5p3pno | hsa-miR-1180               | 0.20  | 4.05  | 0.37 | 0.54 | 0.93 |
| mir-5p3pno | hsa-miR-484                | 0.18  | 6.24  | 0.37 | 0.54 | 0.93 |
| rRNA       | 5S-L253                    | -0.19 | 3.20  | 0.37 | 0.54 | 0.93 |
| scRNA      | HY1-L434                   | 0.17  | 6.45  | 0.37 | 0.54 | 0.93 |
| tRNA       | chr6.tRNA130-GlnTTG        | 0.25  | 3.35  | 0.37 | 0.54 | 0.93 |
| piRNA      | piR-61465                  | -0.27 | 3.75  | 0.37 | 0.54 | 0.93 |
| piRNA      | piR-35411-L4               | 0.28  | 2.53  | 0.36 | 0.55 | 0.93 |
| rRNA       | LSU-rRNA_Hsa-L236          | -0.39 | 1.43  | 0.36 | 0.55 | 0.93 |
| scRNA      | HY1-L208                   | 0.21  | 3.29  | 0.36 | 0.55 | 0.93 |
| rRNA       | 5S-L1214                   | -0.33 | 1.33  | 0.36 | 0.55 | 0.93 |
| mir-3p     | hsa-miR-548g-3p            | -0.31 | 2.15  | 0.36 | 0.55 | 0.93 |
| mir-3p     | hsa-miR-2115-3p            | -0.43 | 1.61  | 0.36 | 0.55 | 0.93 |
| scRNA      | HY1-L25                    | -0.29 | 1.88  | 0.36 | 0.55 | 0.93 |
| tRF5       | chr1.tRNA118-HisGTG-tRF5   | -0.31 | 1.83  | 0.36 | 0.55 | 0.93 |
| mir-5p     | hsa-miR-550a-3-5p          | -0.32 | 1.55  | 0.36 | 0.55 | 0.93 |
| tRF3       | chr10.tRNA5-PseudoCTG-tRF3 | -0.31 | 1.70  | 0.36 | 0.55 | 0.93 |
| mir-3p     | hsa-miR-654-3p             | -0.30 | 3.75  | 0.36 | 0.55 | 0.93 |
| scRNA      | HY1-L78                    | 0.34  | 1.39  | 0.36 | 0.55 | 0.93 |
| mir-5p     | hsa-miR-3158-5p-L2         | 0.42  | 1.49  | 0.36 | 0.55 | 0.93 |
| mir-5p3pno | hsa-let-7c-L2              | 0.13  | 5.48  | 0.36 | 0.55 | 0.93 |
| snoRNA     | U105B                      | -0.31 | 4.75  | 0.35 | 0.55 | 0.93 |
| scRNA      | HY4-L147                   | 0.12  | 9.21  | 0.35 | 0.55 | 0.93 |
| mir-3p     | hsa-miR-17-3p              | -0.36 | 1.53  | 0.35 | 0.55 | 0.93 |
| scRNA      | HY1-L227                   | -0.38 | 1.30  | 0.35 | 0.55 | 0.93 |
| snoRNA     | mgU2-19/30                 | 0.19  | 3.71  | 0.34 | 0.56 | 0.93 |
| scRNA      | HY4-L77                    | -0.24 | 2.15  | 0.34 | 0.56 | 0.93 |
| rRNA       | LSU-rRNA_Hsa-L387          | 0.13  | 9.35  | 0.34 | 0.56 | 0.93 |
| snoRNA     | HBII-142                   | -0.30 | 3.42  | 0.34 | 0.56 | 0.93 |
| mir-5p     | hsa-miR-142-5p             | -0.19 | 5.73  | 0.34 | 0.56 | 0.93 |
| scRNA      | BC200-L134                 | -0.41 | 1.43  | 0.34 | 0.56 | 0.93 |
| scRNA      | BC200-L161                 | 0.38  | 1.53  | 0.34 | 0.56 | 0.93 |
| scRNA      | HY4-L132                   | 0.31  | 2.50  | 0.34 | 0.56 | 0.93 |
| rRNA       | LSU-rRNA_Hsa-L203          | 0.16  | 5.91  | 0.34 | 0.56 | 0.93 |
| mir-5p     | hsa-miR-214-5p             | 0.37  | 1.57  | 0.33 | 0.56 | 0.93 |
| mir-5p     | hsa-miR-654-5p             | 0.28  | 3.09  | 0.33 | 0.56 | 0.93 |
| mir-3p     | hsa-miR-3591-3p            | -0.28 | 12.23 | 0.33 | 0.56 | 0.93 |
| tRNA       | chr6.tRNA168-TrpCCA        | -0.35 | 2.05  | 0.33 | 0.56 | 0.93 |

|            |                           |       |      |      |      |      |
|------------|---------------------------|-------|------|------|------|------|
| scRNA      | HY4-L69                   | 0.12  | 9.89 | 0.33 | 0.57 | 0.94 |
| scRNA      | HY1-L179                  | 0.15  | 6.39 | 0.33 | 0.57 | 0.94 |
| tRNA       | chr1.tRNA15-GlnCTG        | 0.21  | 2.98 | 0.32 | 0.57 | 0.94 |
| snoRNA     | U24                       | -0.38 | 2.09 | 0.32 | 0.57 | 0.94 |
| rRNA       | 5S-L282                   | 0.32  | 1.46 | 0.32 | 0.57 | 0.94 |
| scRNA      | HY1-L342                  | 0.36  | 1.37 | 0.32 | 0.57 | 0.94 |
| tRNA       | chr16.tRNA10-LysCTT       | -0.16 | 4.96 | 0.32 | 0.57 | 0.94 |
| rRNA       | LSU-rRNA_Hsa-L140         | -0.23 | 4.43 | 0.32 | 0.57 | 0.94 |
| piRNA      | piR-60577-L3              | 0.15  | 7.08 | 0.32 | 0.57 | 0.94 |
| mir-5p     | hsa-miR-15a-5p            | -0.17 | 3.78 | 0.31 | 0.58 | 0.94 |
| scRNA      | HY4-L138                  | -0.12 | 8.42 | 0.31 | 0.58 | 0.94 |
| tRF5       | chr1.tRNA125-PseudoGTT-tF | 0.34  | 1.49 | 0.31 | 0.58 | 0.94 |
| tRNA       | chr16.tRNA32-LysCTT       | -0.31 | 2.11 | 0.31 | 0.58 | 0.94 |
| snoRNA     | HBII-420                  | -0.28 | 4.25 | 0.31 | 0.58 | 0.94 |
| scRNA      | HY4-L70                   | -0.12 | 9.07 | 0.31 | 0.58 | 0.94 |
| scRNA      | HY3-L208                  | 0.30  | 1.34 | 0.31 | 0.58 | 0.94 |
| snoRNA     | U105                      | -0.34 | 2.35 | 0.31 | 0.58 | 0.94 |
| tRNA       | chr12.tRNA4-AspGTC        | -0.24 | 4.64 | 0.31 | 0.58 | 0.94 |
| snoRNA     | SNORD126                  | 0.28  | 2.74 | 0.31 | 0.58 | 0.94 |
| snoRNA     | U60                       | -0.27 | 4.21 | 0.31 | 0.58 | 0.94 |
| rRNA       | 5S-L804                   | -0.15 | 4.97 | 0.30 | 0.58 | 0.94 |
| scRNA      | BC200-L11                 | -0.33 | 1.53 | 0.30 | 0.58 | 0.94 |
| rRNA       | 5S-L363                   | -0.30 | 1.50 | 0.30 | 0.58 | 0.94 |
| rRNA       | 5S-L471                   | -0.25 | 2.19 | 0.30 | 0.58 | 0.94 |
| scRNA      | HY4-L58                   | 0.15  | 3.81 | 0.30 | 0.59 | 0.94 |
| scRNA      | HY1                       | 0.14  | 6.00 | 0.30 | 0.59 | 0.94 |
| mir-5p     | hsa-miR-342-5p            | 0.17  | 6.55 | 0.30 | 0.59 | 0.94 |
| mir-3p     | hsa-miR-221-3p            | -0.15 | 7.16 | 0.29 | 0.59 | 0.94 |
| scRNA      | HY1-L324                  | 0.29  | 1.92 | 0.29 | 0.59 | 0.94 |
| rRNA       | LSU-rRNA_Hsa-L278         | 0.19  | 2.72 | 0.29 | 0.59 | 0.94 |
| tRNA       | chr1.tRNA9-ArgTCT         | -0.24 | 2.50 | 0.29 | 0.59 | 0.94 |
| tRNA       | chr16.tRNA34-GlyCCC       | 0.21  | 4.00 | 0.29 | 0.59 | 0.94 |
| mir-3p     | hsa-miR-424-3p            | -0.20 | 4.70 | 0.29 | 0.59 | 0.94 |
| rRNA       | 5S-L1075                  | -0.20 | 3.11 | 0.29 | 0.59 | 0.94 |
| scRNA      | HY3-L239                  | -0.26 | 1.81 | 0.29 | 0.59 | 0.94 |
| piRNA      | piR-35982-L6              | -0.38 | 1.98 | 0.29 | 0.59 | 0.94 |
| mir-5p3pno | hsa-miR-2110              | -0.13 | 5.17 | 0.28 | 0.59 | 0.94 |
| scRNA      | BC200-L7                  | 0.29  | 2.61 | 0.28 | 0.59 | 0.94 |
| scRNA      | HY1-L259                  | 0.15  | 5.48 | 0.28 | 0.59 | 0.94 |
| snoRNA     | ACA66                     | 0.34  | 2.24 | 0.28 | 0.59 | 0.94 |
| rRNA       | 5S-L1262                  | 0.40  | 1.38 | 0.28 | 0.60 | 0.94 |
| snoRNA     | ACA58                     | -0.35 | 1.85 | 0.28 | 0.60 | 0.94 |
| mir-5p     | hsa-miR-24-2-5p           | -0.17 | 4.12 | 0.28 | 0.60 | 0.94 |

|            |                           |       |       |      |      |      |
|------------|---------------------------|-------|-------|------|------|------|
| mir-5p     | hsa-miR-140-5p            | -0.19 | 4.20  | 0.28 | 0.60 | 0.94 |
| mir-3p     | hsa-miR-30e-3p            | -0.11 | 8.45  | 0.28 | 0.60 | 0.94 |
| rRNA       | 5S-L746                   | 0.32  | 2.21  | 0.27 | 0.60 | 0.94 |
| scRNA      | HY5-L19                   | 0.25  | 2.11  | 0.27 | 0.60 | 0.94 |
| tRNA       | chr7.tRNA3-ArgCCT         | 0.15  | 5.38  | 0.27 | 0.60 | 0.94 |
| snRNA      | U1-L7                     | -0.14 | 6.15  | 0.27 | 0.60 | 0.94 |
| tRNA       | chr15.tRNA2-LysCTT        | -0.12 | 6.59  | 0.27 | 0.60 | 0.94 |
| mir-5p     | hsa-miR-224-5p            | -0.16 | 6.88  | 0.27 | 0.60 | 0.94 |
| mir-5p     | hsa-miR-194-5p            | -0.16 | 4.47  | 0.27 | 0.60 | 0.94 |
| rRNA       | 5S-L1179                  | -0.30 | 1.46  | 0.27 | 0.60 | 0.94 |
| tRNA       | chr17.tRNA14-ThrCGT       | 0.32  | 1.87  | 0.27 | 0.60 | 0.94 |
| mir-5p     | hsa-miR-139-5p            | 0.13  | 6.03  | 0.27 | 0.61 | 0.94 |
| tRNA       | chr20.tRNA3-PseudoCAC     | 0.27  | 1.30  | 0.26 | 0.61 | 0.95 |
| mir-5p     | hsa-miR-505-5p            | 0.32  | 1.81  | 0.26 | 0.61 | 0.95 |
| snoRNA     | ACA61                     | -0.39 | 2.02  | 0.26 | 0.61 | 0.95 |
| scRNA      | HY1-L295                  | 0.16  | 4.37  | 0.26 | 0.61 | 0.95 |
| scRNA      | HY4-L129                  | -0.16 | 3.45  | 0.26 | 0.61 | 0.95 |
| scRNA      | HY3-L105                  | -0.20 | 3.97  | 0.26 | 0.61 | 0.95 |
| mir-5p     | hsa-miR-30b-5p            | 0.24  | 2.47  | 0.26 | 0.61 | 0.95 |
| mir-5p     | hsa-miR-4732-5p           | -0.20 | 3.27  | 0.25 | 0.61 | 0.95 |
| mir-3p     | hsa-miR-200b-3p           | -0.26 | 1.87  | 0.25 | 0.62 | 0.95 |
| piRNA      | piR-37525                 | -0.38 | 1.54  | 0.25 | 0.62 | 0.95 |
| snoRNA     | ACA7                      | -0.34 | 2.30  | 0.25 | 0.62 | 0.95 |
| scRNA      | HY1-L263                  | 0.19  | 2.72  | 0.25 | 0.62 | 0.95 |
| scRNA      | HY4-L135                  | -0.10 | 18.67 | 0.25 | 0.62 | 0.95 |
| mir-3p     | hsa-miR-18a-3p            | 0.23  | 2.18  | 0.25 | 0.62 | 0.95 |
| mir-3p     | hsa-miR-4677-3p           | 0.25  | 1.78  | 0.25 | 0.62 | 0.95 |
| scRNA      | HY3-L82                   | -0.18 | 3.20  | 0.25 | 0.62 | 0.95 |
| mir-5p     | hsa-miR-193b-5p           | -0.27 | 2.08  | 0.25 | 0.62 | 0.95 |
| tRF5       | chr5.tRNA22-AspGTC-tRF5   | 0.29  | 2.30  | 0.24 | 0.62 | 0.95 |
| mir-5p     | hsa-miR-1292-5p           | -0.27 | 1.70  | 0.24 | 0.62 | 0.95 |
| mir-3p     | hsa-miR-548o-3p-L2        | -0.19 | 3.14  | 0.24 | 0.62 | 0.95 |
| rRNA       | LSU-rRNA_Hsa-L18          | -0.19 | 5.98  | 0.24 | 0.62 | 0.95 |
| scRNA      | HY1-L137                  | 0.16  | 4.44  | 0.24 | 0.62 | 0.95 |
| piRNA      | piR-34041                 | 0.29  | 4.17  | 0.24 | 0.63 | 0.95 |
| rRNA       | 5S-L357                   | 0.23  | 2.11  | 0.24 | 0.63 | 0.95 |
| snoRNA     | HBII-336                  | 0.31  | 2.07  | 0.24 | 0.63 | 0.95 |
| tRF3       | chr17.tRNA1-Pseudo???-tRF | -0.25 | 2.09  | 0.24 | 0.63 | 0.95 |
| mir-5p3pno | hsa-miR-4326              | -0.32 | 1.51  | 0.23 | 0.63 | 0.95 |
| snoRNA     | HBII-13                   | -0.36 | 3.91  | 0.23 | 0.63 | 0.95 |
| mir-5p     | hsa-miR-379-5p            | -0.19 | 5.35  | 0.23 | 0.63 | 0.95 |
| scRNA      | HY4-L16                   | -0.13 | 3.92  | 0.23 | 0.63 | 0.95 |
| mir-5p3pno | hsa-miR-598               | 0.31  | 1.77  | 0.23 | 0.63 | 0.95 |

|            |                           |       |      |      |      |      |
|------------|---------------------------|-------|------|------|------|------|
| tRF5       | chr6.tRNA130-GlnTTG-tRF5  | -0.23 | 1.89 | 0.23 | 0.63 | 0.95 |
| snRNA      | U3-L4                     | -0.33 | 1.56 | 0.23 | 0.63 | 0.95 |
| mir-5p3pno | hsa-miR-103b              | 0.12  | 8.26 | 0.23 | 0.63 | 0.95 |
| scRNA      | HY1-L287                  | 0.13  | 6.16 | 0.23 | 0.63 | 0.95 |
| rRNA       | 5S-L1234                  | 0.14  | 5.10 | 0.23 | 0.63 | 0.95 |
| tRF3       | chr15.tRNA6-PseudoCTT-tRF | -0.28 | 2.01 | 0.22 | 0.64 | 0.95 |
| scRNA      | HY1-L418                  | 0.25  | 1.64 | 0.22 | 0.64 | 0.95 |
| snoRNA     | mgU6-47                   | 0.36  | 1.72 | 0.22 | 0.64 | 0.95 |
| scRNA      | HY4-L98                   | -0.10 | 9.97 | 0.22 | 0.64 | 0.95 |
| piRNA      | piR-43995-L4              | -0.12 | 6.52 | 0.22 | 0.64 | 0.95 |
| mir-5p     | hsa-miR-550a-5p-L2        | -0.16 | 3.39 | 0.22 | 0.64 | 0.95 |
| mir-5p     | hsa-miR-3605-5p           | 0.23  | 2.60 | 0.22 | 0.64 | 0.95 |
| rRNA       | LSU-rRNA_Hsa-L249         | -0.13 | 7.95 | 0.22 | 0.64 | 0.95 |
| snoRNA     | ACA3                      | 0.22  | 2.48 | 0.22 | 0.64 | 0.95 |
| scRNA      | HY4-L59                   | 0.11  | 4.56 | 0.22 | 0.64 | 0.95 |
| mir-5p3pno | hsa-miR-433               | 0.21  | 3.46 | 0.21 | 0.64 | 0.95 |
| scRNA      | HY1-L276                  | 0.16  | 3.15 | 0.21 | 0.64 | 0.95 |
| mir-5p     | hsa-miR-22-5p             | 0.17  | 3.80 | 0.21 | 0.65 | 0.95 |
| piRNA      | piR-59299                 | -0.27 | 1.72 | 0.21 | 0.65 | 0.95 |
| mir-5p     | hsa-miR-4746-5p           | -0.24 | 1.73 | 0.21 | 0.65 | 0.95 |
| rRNA       | LSU-rRNA_Hsa-L323         | -0.17 | 8.20 | 0.21 | 0.65 | 0.95 |
| piRNA      | piR-41209-L2              | -0.18 | 3.73 | 0.21 | 0.65 | 0.95 |
| snoRNA     | U27                       | -0.22 | 4.90 | 0.21 | 0.65 | 0.95 |
| tRF5       | chr6.tRNA78-LeuAAG-tRF5   | -0.36 | 1.31 | 0.21 | 0.65 | 0.95 |
| mir-3p     | hsa-miR-542-3p            | -0.21 | 3.59 | 0.21 | 0.65 | 0.95 |
| mir-5p     | hsa-miR-30a-5p            | -0.11 | 7.14 | 0.21 | 0.65 | 0.95 |
| scRNA      | HY1-L439                  | -0.15 | 2.44 | 0.20 | 0.65 | 0.95 |
| piRNA      | piR-43772-L2              | -0.11 | 6.19 | 0.20 | 0.65 | 0.95 |
| scRNA      | BC200-L159                | -0.28 | 1.51 | 0.20 | 0.65 | 0.95 |
| snoRNA     | U3-4                      | -0.17 | 7.31 | 0.20 | 0.65 | 0.95 |
| scRNA      | HY4-L87                   | -0.09 | 9.96 | 0.20 | 0.65 | 0.95 |
| scRNA      | HY4-L102                  | -0.10 | 8.16 | 0.20 | 0.65 | 0.95 |
| tRNA       | chr16.tRNA18-GlyGCC       | 0.23  | 1.78 | 0.20 | 0.66 | 0.95 |
| mir-5p3pno | hsa-miR-378e              | -0.25 | 1.49 | 0.20 | 0.66 | 0.95 |
| scRNA      | HY4-L50                   | 0.26  | 1.52 | 0.20 | 0.66 | 0.95 |
| rRNA       | 5S-L1067                  | -0.16 | 2.57 | 0.20 | 0.66 | 0.95 |
| scRNA      | HY4-L37                   | -0.14 | 4.01 | 0.20 | 0.66 | 0.95 |
| mir-5p     | hsa-miR-629-5p            | -0.11 | 7.76 | 0.20 | 0.66 | 0.95 |
| mir-5p     | hsa-miR-3074-5p           | 0.11  | 9.31 | 0.20 | 0.66 | 0.95 |
| scRNA      | HY4-L150                  | 0.18  | 3.26 | 0.20 | 0.66 | 0.95 |
| tRNA       | chr6.tRNA38-IleAAT        | 0.41  | 3.15 | 0.20 | 0.66 | 0.95 |
| scRNA      | BC200-L49                 | 0.16  | 4.36 | 0.20 | 0.66 | 0.95 |
| piRNA      | piR-41209                 | 0.18  | 2.58 | 0.19 | 0.66 | 0.95 |

|            |                         |       |       |      |      |      |
|------------|-------------------------|-------|-------|------|------|------|
| scRNA      | HY4-L99                 | -0.23 | 1.47  | 0.19 | 0.66 | 0.95 |
| scRNA      | HY4-L18                 | 0.24  | 1.43  | 0.19 | 0.66 | 0.96 |
| rRNA       | 5S-L297                 | -0.24 | 1.59  | 0.19 | 0.66 | 0.96 |
| tRNA       | chr17.tRNA23-ArgCCG     | 0.15  | 3.40  | 0.19 | 0.67 | 0.96 |
| mir-5p     | hsa-miR-584-5p          | 0.12  | 7.31  | 0.18 | 0.67 | 0.96 |
| scRNA      | HY4-L12                 | -0.10 | 5.27  | 0.18 | 0.67 | 0.96 |
| mir-3p     | hsa-miR-10b-3p          | -0.26 | 1.70  | 0.18 | 0.67 | 0.96 |
| rRNA       | 5S-L489                 | -0.63 | 5.18  | 0.18 | 0.67 | 0.96 |
| piRNA      | piR-33468-L4            | -0.14 | 2.34  | 0.18 | 0.67 | 0.96 |
| snoRNA     | HBII-99B                | -0.33 | 1.87  | 0.18 | 0.67 | 0.96 |
| tRF5       | chr6.tRNA56-PheGAA-tRF5 | 0.37  | 1.38  | 0.18 | 0.67 | 0.96 |
| scRNA      | HY5-L21                 | 0.13  | 11.03 | 0.18 | 0.67 | 0.96 |
| piRNA      | piR-36741-L2            | -0.27 | 1.62  | 0.18 | 0.67 | 0.96 |
| tRNA       | chr16.tRNA25-GlyGCC     | -0.13 | 4.78  | 0.18 | 0.67 | 0.96 |
| piRNA      | piR-33404               | -0.17 | 6.30  | 0.18 | 0.67 | 0.96 |
| mir-5p     | hsa-miR-9-5p-L3         | 0.18  | 3.09  | 0.18 | 0.67 | 0.96 |
| scRNA      | HY1-L273                | -0.19 | 1.90  | 0.18 | 0.68 | 0.96 |
| tRNA       | chr18.tRNA4-LysCTT      | 0.15  | 6.31  | 0.17 | 0.68 | 0.96 |
| mir-5p     | hsa-miR-192-5p          | -0.10 | 8.24  | 0.17 | 0.68 | 0.96 |
| rRNA       | LSU-rRNA_Hsa-L159       | 0.15  | 2.57  | 0.17 | 0.68 | 0.96 |
| mir-5p3pno | hsa-miR-133a            | -0.37 | 1.55  | 0.17 | 0.68 | 0.96 |
| mir-5p     | hsa-miR-338-5p          | 0.15  | 4.39  | 0.17 | 0.68 | 0.96 |
| snoRNA     | U13-L162                | -0.21 | 2.03  | 0.17 | 0.68 | 0.96 |
| tRNA       | chr15.tRNA4-ArgTCG      | 0.25  | 2.60  | 0.17 | 0.68 | 0.96 |
| mir-5p     | hsa-miR-92b-5p          | 0.18  | 2.27  | 0.17 | 0.68 | 0.96 |
| mir-3p     | hsa-miR-136-3p          | -0.22 | 2.62  | 0.17 | 0.68 | 0.96 |
| scRNA      | HY1-L430                | 0.26  | 1.34  | 0.17 | 0.68 | 0.96 |
| tRF3       | chr12.tRNA7-AspGTC-tRF3 | -0.32 | 1.65  | 0.17 | 0.68 | 0.96 |
| scRNA      | HY4-L57                 | -0.14 | 2.80  | 0.17 | 0.68 | 0.96 |
| mir-3p     | hsa-miR-142-3p          | 0.10  | 5.68  | 0.17 | 0.68 | 0.96 |
| mir-3p     | hsa-miR-330-3p          | -0.13 | 3.77  | 0.17 | 0.68 | 0.96 |
| snRNA      | U5-L67                  | -0.13 | 7.03  | 0.16 | 0.69 | 0.96 |
| scRNA      | HY4-L6                  | -0.11 | 3.98  | 0.16 | 0.69 | 0.96 |
| snoRNA     | U91                     | -0.32 | 2.24  | 0.16 | 0.69 | 0.96 |
| tRNA       | chr1.tRNA128-LysCTT     | 0.17  | 3.24  | 0.16 | 0.69 | 0.96 |
| snoRNA     | U62B                    | 0.19  | 3.72  | 0.16 | 0.69 | 0.96 |
| tRF5       | chr3.tRNA5-LeuAAG-tRF5  | 0.12  | 3.59  | 0.16 | 0.69 | 0.96 |
| tRNA       | chr6.tRNA83-LeuTAA      | 0.17  | 2.22  | 0.16 | 0.69 | 0.96 |
| scRNA      | HY4-L153                | -0.08 | 8.62  | 0.16 | 0.69 | 0.96 |
| mir-5p     | hsa-miR-548ay-5p        | -0.22 | 2.18  | 0.16 | 0.69 | 0.96 |
| piRNA      | piR-38502               | -0.19 | 3.33  | 0.16 | 0.69 | 0.96 |
| snoRNA     | U23                     | -0.25 | 1.46  | 0.16 | 0.69 | 0.96 |
| snoRNA     | U83A                    | 0.19  | 3.52  | 0.16 | 0.69 | 0.96 |



|            |                            |       |       |      |      |      |
|------------|----------------------------|-------|-------|------|------|------|
| tRF3       | chr1.tRNA55-LysTTT-tRF3    | 0.22  | 2.49  | 0.15 | 0.69 | 0.96 |
| tRNA       | chr2.tRNA23-GlnTTG         | 0.23  | 3.06  | 0.15 | 0.69 | 0.96 |
| tRNA       | chr6.tRNA73-ArgCCG         | -0.19 | 2.37  | 0.15 | 0.70 | 0.96 |
| snoRNA     | HBI-43                     | -0.18 | 3.60  | 0.15 | 0.70 | 0.96 |
| piRNA      | piR-33082-L2               | 0.21  | 1.79  | 0.15 | 0.70 | 0.96 |
| mir-3p     | hsa-miR-3913-3p            | -0.20 | 1.59  | 0.15 | 0.70 | 0.96 |
| snRNA      | U7-L159                    | 0.31  | 1.62  | 0.15 | 0.70 | 0.96 |
| scRNA      | HY4-L134                   | -0.19 | 2.51  | 0.15 | 0.70 | 0.96 |
| rRNA       | LSU-rRNA_Hsa-L295          | 0.14  | 3.46  | 0.15 | 0.70 | 0.96 |
| tRF5       | chr3.tRNA9-PseudoTTG-tRF5  | -0.26 | 1.99  | 0.15 | 0.70 | 0.96 |
| mir-3p     | hsa-let-7f-1-3p            | -0.27 | 1.62  | 0.15 | 0.70 | 0.96 |
| scRNA      | HY4-L43                    | -0.15 | 2.22  | 0.15 | 0.70 | 0.96 |
| rRNA       | LSU-rRNA_Hsa-L208          | 0.09  | 7.16  | 0.15 | 0.70 | 0.96 |
| scRNA      | HY1-L184                   | 0.11  | 3.77  | 0.14 | 0.71 | 0.97 |
| scRNA      | HY4-L14                    | -0.08 | 8.83  | 0.14 | 0.71 | 0.97 |
| scRNA      | HY4-L30                    | -0.10 | 3.53  | 0.14 | 0.71 | 0.97 |
| tRNA       | chr17.tRNA16-GlnTTG        | 0.15  | 2.36  | 0.14 | 0.71 | 0.97 |
| mir-5p     | hsa-miR-589-5p             | 0.12  | 4.55  | 0.14 | 0.71 | 0.97 |
| tRNA       | chr14.tRNA4-ThrTGT         | 0.23  | 1.44  | 0.14 | 0.71 | 0.97 |
| rRNA       | 5S-L500                    | -0.21 | 1.78  | 0.14 | 0.71 | 0.97 |
| mir-5p     | hsa-miR-1228-5p            | 0.24  | 2.00  | 0.14 | 0.71 | 0.97 |
| mir-5p     | hsa-miR-106a-5p            | -0.15 | 2.83  | 0.14 | 0.71 | 0.97 |
| tRNA       | chr1.tRNA38-LeuCAG         | 0.17  | 3.68  | 0.14 | 0.71 | 0.97 |
| rRNA       | 5S-L995                    | -0.45 | 3.46  | 0.14 | 0.71 | 0.97 |
| mir-5p     | hsa-miR-129-5p-L2          | -0.18 | 1.82  | 0.14 | 0.71 | 0.97 |
| mir-3p     | hsa-miR-423-3p             | 0.08  | 8.89  | 0.14 | 0.71 | 0.97 |
| piRNA      | piR-39361                  | 0.31  | 2.73  | 0.14 | 0.71 | 0.97 |
| rRNA       | 5S-L803                    | -0.09 | 7.74  | 0.13 | 0.71 | 0.97 |
| mir-3p     | hsa-miR-130b-3p            | -0.15 | 2.46  | 0.13 | 0.71 | 0.97 |
| mir-5p     | hsa-miR-3613-5p            | 0.12  | 4.64  | 0.13 | 0.71 | 0.97 |
| tRF3       | chr7.tRNA26-PseudoTTG-tRF3 | -0.19 | 2.24  | 0.13 | 0.72 | 0.97 |
| rRNA       | 5S-L344                    | -0.14 | 2.37  | 0.13 | 0.72 | 0.97 |
| scRNA      | HY4                        | -0.07 | 10.16 | 0.13 | 0.72 | 0.97 |
| mir-3p     | hsa-miR-130a-3p            | -0.12 | 3.58  | 0.13 | 0.72 | 0.97 |
| mir-5p3pno | hsa-miR-889                | 0.19  | 2.82  | 0.13 | 0.72 | 0.97 |
| mir-3p     | hsa-miR-501-3p             | -0.10 | 4.83  | 0.13 | 0.72 | 0.97 |
| rRNA       | 5S-L105                    | -0.10 | 5.89  | 0.13 | 0.72 | 0.97 |
| snRNA      | U2-L388                    | 0.14  | 3.41  | 0.13 | 0.72 | 0.97 |
| rRNA       | LSU-rRNA_Hsa-L220          | -0.14 | 4.41  | 0.12 | 0.73 | 0.97 |
| tRNA       | chr1.tRNA16-HisGTG         | 0.08  | 11.64 | 0.12 | 0.73 | 0.97 |
| rRNA       | LSU-rRNA_Hsa-L51           | 0.17  | 4.19  | 0.12 | 0.73 | 0.97 |
| tRNA       | chr6.tRNA87-GluCTC         | -0.08 | 15.82 | 0.12 | 0.73 | 0.97 |
| snoRNA     | U83                        | 0.18  | 2.97  | 0.12 | 0.73 | 0.97 |

|            |                           |       |       |      |      |      |
|------------|---------------------------|-------|-------|------|------|------|
| piRNA      | piR-32678-L3              | -0.09 | 10.98 | 0.12 | 0.73 | 0.97 |
| scRNA      | HY3-L140                  | -0.17 | 2.65  | 0.12 | 0.73 | 0.97 |
| tRF5       | chr9.tRNA6-AspGTC-tRF5    | 0.15  | 2.90  | 0.12 | 0.73 | 0.97 |
| rRNA       | 5S-L731                   | -0.18 | 1.51  | 0.12 | 0.73 | 0.97 |
| rRNA       | LSU-rRNA_Hsa-L331         | -0.19 | 1.53  | 0.12 | 0.73 | 0.97 |
| mir-3p     | hsa-miR-19b-3p            | 0.13  | 4.04  | 0.12 | 0.73 | 0.97 |
| mir-5p     | hsa-miR-132-5p            | -0.18 | 2.49  | 0.12 | 0.73 | 0.97 |
| mir-5p     | hsa-miR-361-5p            | 0.13  | 3.48  | 0.12 | 0.73 | 0.97 |
| rRNA       | SSU-rRNA_Hsa-L72          | 0.07  | 14.26 | 0.12 | 0.73 | 0.97 |
| piRNA      | piR-50811                 | -0.15 | 3.43  | 0.12 | 0.73 | 0.97 |
| tRF5       | chr19.tRNA5-LysCTT-tRF5   | -0.15 | 4.33  | 0.11 | 0.73 | 0.97 |
| rRNA       | 5S-L1217                  | 0.18  | 1.70  | 0.11 | 0.74 | 0.97 |
| mir-5p     | hsa-miR-26b-5p            | 0.08  | 8.15  | 0.11 | 0.74 | 0.97 |
| snoRNA     | U56                       | -0.23 | 2.63  | 0.11 | 0.74 | 0.97 |
| mir-5p     | hsa-miR-181a-5p-L2        | -0.07 | 8.55  | 0.11 | 0.74 | 0.97 |
| snRNA      | U3-L18                    | -0.15 | 6.00  | 0.11 | 0.74 | 0.97 |
| piRNA      | piR-31986                 | -0.12 | 8.37  | 0.11 | 0.74 | 0.97 |
| rRNA       | LSU-rRNA_Hsa-L13          | 0.07  | 12.04 | 0.11 | 0.74 | 0.97 |
| rRNA       | LSU-rRNA_Hsa-L193         | -0.10 | 7.16  | 0.11 | 0.74 | 0.97 |
| snRNA      | U2-L709                   | -0.15 | 3.25  | 0.11 | 0.74 | 0.97 |
| scRNA      | HY4-L61                   | -0.09 | 5.54  | 0.11 | 0.74 | 0.97 |
| tRNA       | chr17.tRNA18-ArgCCT       | 0.16  | 1.71  | 0.11 | 0.74 | 0.97 |
| mir-5p     | hsa-miR-26a-5p-L2         | 0.07  | 10.75 | 0.11 | 0.74 | 0.97 |
| snoRNA     | U64                       | -0.17 | 2.08  | 0.11 | 0.74 | 0.97 |
| piRNA      | piR-36412                 | -0.15 | 2.36  | 0.11 | 0.74 | 0.97 |
| mir-5p3pno | hsa-miR-1301              | -0.10 | 4.06  | 0.11 | 0.74 | 0.97 |
| rRNA       | 5S-L100                   | -0.16 | 2.88  | 0.11 | 0.74 | 0.97 |
| mir-5p3pno | hsa-miR-3138              | -0.21 | 1.71  | 0.11 | 0.74 | 0.97 |
| tRNA       | chr1.tRNA58-LeuCAA        | -0.13 | 3.40  | 0.11 | 0.74 | 0.97 |
| rRNA       | 5S-L930                   | 0.18  | 1.75  | 0.11 | 0.74 | 0.97 |
| piRNA      | piR-36074                 | 0.11  | 4.27  | 0.11 | 0.74 | 0.97 |
| mir-5p     | hsa-miR-3173-5p           | 0.27  | 2.41  | 0.11 | 0.74 | 0.97 |
| tRNA       | chr17.tRNA17-SupTTA       | -0.17 | 2.90  | 0.11 | 0.74 | 0.97 |
| tRNA       | chr6.tRNA30-ProCGG        | -0.09 | 10.88 | 0.10 | 0.75 | 0.97 |
| mir-3p     | hsa-miR-132-3p            | -0.18 | 1.92  | 0.10 | 0.75 | 0.97 |
| scRNA      | HY4-L66                   | 0.07  | 7.15  | 0.10 | 0.75 | 0.97 |
| tRF3       | chr19.tRNA9-PseudoTTT-tRF | 0.24  | 1.65  | 0.10 | 0.75 | 0.97 |
| mir-5p3pno | hsa-miR-215               | 0.13  | 3.83  | 0.10 | 0.75 | 0.97 |
| scRNA      | HY4-L159                  | -0.09 | 4.46  | 0.10 | 0.75 | 0.97 |
| tRNA       | chr1.tRNA110-PseudoTTC    | -0.18 | 1.44  | 0.10 | 0.75 | 0.97 |
| mir-5p3pno | hsa-miR-4461              | -0.22 | 2.06  | 0.10 | 0.75 | 0.97 |
| snoRNA     | U59A                      | -0.15 | 6.70  | 0.10 | 0.75 | 0.97 |
| tRNA       | chr1.tRNA106-HisGTG       | 0.10  | 3.36  | 0.10 | 0.75 | 0.97 |

|            |                           |       |       |      |      |      |
|------------|---------------------------|-------|-------|------|------|------|
| scRNA      | HY3-L497                  | -0.14 | 2.14  | 0.10 | 0.75 | 0.97 |
| rRNA       | LSU-rRNA_Hsa-L178         | -0.16 | 3.24  | 0.10 | 0.75 | 0.97 |
| mir-3p     | hsa-miR-30a-3p            | 0.09  | 5.31  | 0.10 | 0.75 | 0.97 |
| snRNA      | U5-L2                     | -0.08 | 6.33  | 0.10 | 0.76 | 0.97 |
| tRF3       | chrX.tRNA2-LeuTAA-tRF3    | 0.18  | 1.82  | 0.09 | 0.76 | 0.97 |
| scRNA      | HY1-L106                  | -0.13 | 1.92  | 0.09 | 0.76 | 0.97 |
| tRF5       | chr6.tRNA109-PheGAA-tRF5  | -0.20 | 2.26  | 0.09 | 0.76 | 0.97 |
| snoRNA     | ACA54                     | -0.17 | 1.60  | 0.09 | 0.76 | 0.97 |
| rRNA       | 5S-L1070                  | -0.16 | 1.47  | 0.09 | 0.76 | 0.97 |
| rRNA       | 5S-L247                   | -0.14 | 1.54  | 0.09 | 0.76 | 0.97 |
| mir-5p     | hsa-miR-2115-5p           | -0.17 | 1.27  | 0.09 | 0.76 | 0.97 |
| rRNA       | SSU-rRNA_Hsa-L26          | 0.12  | 3.24  | 0.09 | 0.77 | 0.97 |
| snoRNA     | HBII-289                  | -0.10 | 7.18  | 0.09 | 0.77 | 0.97 |
| scRNA      | HY5-L9                    | 0.15  | 1.40  | 0.09 | 0.77 | 0.97 |
| mir-3p     | hsa-miR-425-3p            | -0.09 | 4.14  | 0.09 | 0.77 | 0.97 |
| tRNA       | chrX.tRNA2-LeuTAA         | -0.18 | 1.38  | 0.08 | 0.77 | 0.97 |
| scRNA      | HY1-L13                   | 0.11  | 2.51  | 0.08 | 0.77 | 0.97 |
| rRNA       | 5S-L21                    | 0.11  | 2.71  | 0.08 | 0.77 | 0.97 |
| mir-5p     | hsa-miR-193a-5p           | -0.09 | 5.17  | 0.08 | 0.77 | 0.97 |
| snoRNA     | E2                        | 0.20  | 2.14  | 0.08 | 0.77 | 0.97 |
| mir-3p     | hsa-miR-3150b-3p          | -0.18 | 1.47  | 0.08 | 0.77 | 0.97 |
| piRNA      | piR-36323-L3              | 0.14  | 2.88  | 0.08 | 0.77 | 0.97 |
| mir-3p     | hsa-miR-21-3p             | 0.16  | 1.95  | 0.08 | 0.77 | 0.97 |
| scRNA      | HY1-L175                  | -0.20 | 2.06  | 0.08 | 0.77 | 0.97 |
| snoRNA     | HBI-115                   | -0.22 | 2.00  | 0.08 | 0.78 | 0.97 |
| mir-3p     | hsa-miR-570-3p            | -0.12 | 1.85  | 0.08 | 0.78 | 0.97 |
| scRNA      | HY3-L282                  | 0.11  | 3.75  | 0.08 | 0.78 | 0.97 |
| mir-3p     | hsa-miR-16-2-3p           | 0.08  | 7.97  | 0.08 | 0.78 | 0.97 |
| scRNA      | HY4-L10                   | -0.06 | 10.20 | 0.08 | 0.78 | 0.97 |
| mir-3p     | hsa-miR-181a-2-3p         | 0.09  | 4.18  | 0.08 | 0.78 | 0.97 |
| rRNA       | 5S-L1152                  | -0.14 | 1.59  | 0.08 | 0.78 | 0.97 |
| scRNA      | HY3-L34                   | -0.13 | 3.61  | 0.08 | 0.78 | 0.97 |
| mir-5p3pno | hsa-miR-210               | 0.17  | 2.15  | 0.08 | 0.78 | 0.97 |
| mir-5p     | hsa-miR-6723-5p           | -0.11 | 4.58  | 0.08 | 0.78 | 0.97 |
| rRNA       | 5S-L389                   | 0.18  | 1.35  | 0.08 | 0.78 | 0.97 |
| tRNA       | chr1.tRNA52-ProCGG        | -0.13 | 2.13  | 0.08 | 0.78 | 0.97 |
| mir-5p     | hsa-miR-423-5p            | 0.07  | 3.96  | 0.08 | 0.78 | 0.97 |
| scRNA      | HY4-L72                   | 0.06  | 7.28  | 0.08 | 0.78 | 0.97 |
| mir-5p3pno | hsa-miR-1278              | -0.20 | 1.56  | 0.08 | 0.78 | 0.97 |
| mir-5p     | hsa-miR-30e-5p            | -0.07 | 8.13  | 0.08 | 0.78 | 0.97 |
| tRNA       | chr6.tRNA131-GlnCTG       | 0.16  | 1.62  | 0.08 | 0.78 | 0.97 |
| tRF5       | chr1.tRNA132-PseudoCAC-tf | -0.17 | 2.10  | 0.08 | 0.78 | 0.97 |
| mir-5p     | hsa-miR-20a-5p            | -0.09 | 7.17  | 0.07 | 0.78 | 0.97 |

|            |                             |       |       |      |      |      |
|------------|-----------------------------|-------|-------|------|------|------|
| rRNA       | SSU-rRNA_Hsa-L24            | 0.07  | 9.30  | 0.07 | 0.79 | 0.97 |
| mir-3p     | hsa-miR-539-3p              | -0.18 | 1.61  | 0.07 | 0.79 | 0.97 |
| mir-5p     | hsa-miR-345-5p              | -0.13 | 2.70  | 0.07 | 0.79 | 0.97 |
| rRNA       | LSU-rRNA_Hsa-L66            | 0.16  | 1.86  | 0.07 | 0.79 | 0.97 |
| scRNA      | HY4-L38                     | 0.09  | 4.19  | 0.07 | 0.79 | 0.97 |
| mir-5p3pno | hsa-miR-618                 | 0.13  | 2.72  | 0.07 | 0.79 | 0.97 |
| tRNA       | chr6.tRNA143-LysTTT         | -0.11 | 5.55  | 0.07 | 0.79 | 0.97 |
| scRNA      | BC200-L82                   | 0.15  | 1.75  | 0.07 | 0.79 | 0.97 |
| scRNA      | BC200-L126                  | 0.10  | 3.33  | 0.07 | 0.79 | 0.97 |
| mir-5p     | hsa-miR-148b-5p             | 0.11  | 2.86  | 0.07 | 0.79 | 0.97 |
| piRNA      | piR-45195-L2                | 0.17  | 1.33  | 0.07 | 0.79 | 0.97 |
| snRNA      | U5-L76                      | 0.14  | 2.56  | 0.07 | 0.79 | 0.97 |
| tRNA       | chr1.tRNA33-Pseudo???       | -0.10 | 3.32  | 0.07 | 0.79 | 0.97 |
| mir-5p     | hsa-miR-374a-5p             | 0.11  | 2.91  | 0.07 | 0.79 | 0.97 |
| rRNA       | 5S-L397                     | -0.15 | 1.55  | 0.07 | 0.80 | 0.97 |
| scRNA      | HY4-L52                     | -0.08 | 2.37  | 0.07 | 0.80 | 0.97 |
| mir-3p     | hsa-miR-505-3p              | 0.12  | 2.00  | 0.07 | 0.80 | 0.97 |
| tRNA       | chr14.tRNA19-TyrGTA         | 0.13  | 2.52  | 0.06 | 0.80 | 0.97 |
| snRNA      | U14-L5                      | -0.10 | 4.25  | 0.06 | 0.80 | 0.97 |
| tRF5       | chr4.tRNA3-CysGCA-tRF5      | 0.15  | 1.61  | 0.06 | 0.80 | 0.97 |
| piRNA      | piR-41588                   | -0.16 | 1.60  | 0.06 | 0.80 | 0.97 |
| tRNA       | chr1.tRNA72-AspGTC          | 0.09  | 7.23  | 0.06 | 0.80 | 0.97 |
| rRNA       | 5S-L676                     | -0.14 | 1.34  | 0.06 | 0.80 | 0.97 |
| snoRNA     | SNORD125                    | 0.18  | 1.69  | 0.06 | 0.80 | 0.97 |
| rRNA       | LSU-rRNA_Hsa-L139           | 0.06  | 14.15 | 0.06 | 0.80 | 0.97 |
| mir-3p     | hsa-miR-4446-3p             | -0.09 | 3.56  | 0.06 | 0.80 | 0.97 |
| tRF5       | chr17.tRNA33-PseudoTTG-tRF5 | -0.09 | 5.92  | 0.06 | 0.80 | 0.97 |
| rRNA       | LSU-rRNA_Hsa-L382           | -0.06 | 13.70 | 0.06 | 0.81 | 0.97 |
| mir-5p3pno | hsa-miR-487b                | -0.18 | 1.50  | 0.06 | 0.81 | 0.97 |
| tRF5       | chr14.tRNA8-CysGCA-tRF5     | 0.15  | 2.18  | 0.06 | 0.81 | 0.97 |
| rRNA       | SSU-rRNA_Hsa-L10            | -0.05 | 11.45 | 0.06 | 0.81 | 0.97 |
| rRNA       | LSU-rRNA_Hsa-L348           | -0.13 | 1.92  | 0.06 | 0.81 | 0.97 |
| mir-5p     | hsa-miR-532-5p              | -0.06 | 7.72  | 0.06 | 0.81 | 0.97 |
| snoRNA     | U43                         | -0.11 | 4.95  | 0.06 | 0.81 | 0.97 |
| snRNA      | U1-L29                      | 0.12  | 2.03  | 0.06 | 0.81 | 0.97 |
| mir-5p3pno | hsa-miR-1299                | -0.23 | 2.07  | 0.06 | 0.81 | 0.97 |
| mir-5p     | hsa-miR-331-5p              | -0.17 | 1.28  | 0.06 | 0.81 | 0.97 |
| scRNA      | HY1-L397                    | 0.08  | 3.27  | 0.06 | 0.81 | 0.98 |
| snRNA      | U14-L2                      | -0.18 | 1.79  | 0.06 | 0.81 | 0.98 |
| mir-3p     | hsa-miR-381-3p              | -0.11 | 4.43  | 0.05 | 0.82 | 0.98 |
| mir-3p     | hsa-miR-1285-3p             | 0.09  | 3.54  | 0.05 | 0.82 | 0.98 |
| mir-5p     | hsa-miR-17-5p               | -0.08 | 5.08  | 0.05 | 0.82 | 0.98 |
| tRF3       | chr6.tRNA37-ValAAC-tRF3     | 0.11  | 12.93 | 0.05 | 0.82 | 0.98 |

|            |                         |       |       |      |      |      |
|------------|-------------------------|-------|-------|------|------|------|
| mir-3p     | hsa-miR-181a-3p         | -0.11 | 2.62  | 0.05 | 0.82 | 0.98 |
| scRNA      | HY1-L414                | -0.15 | 1.30  | 0.05 | 0.82 | 0.98 |
| scRNA      | HY4-L54                 | -0.05 | 6.72  | 0.05 | 0.82 | 0.98 |
| scRNA      | HY3-L382                | -0.14 | 1.28  | 0.05 | 0.82 | 0.98 |
| scRNA      | HY1-L261                | 0.15  | 1.76  | 0.05 | 0.82 | 0.98 |
| rRNA       | 5S-L819                 | 0.13  | 2.01  | 0.05 | 0.82 | 0.98 |
| mir-3p     | hsa-miR-145-3p          | -0.06 | 4.84  | 0.05 | 0.82 | 0.98 |
| rRNA       | 5S-L71                  | -0.12 | 1.74  | 0.05 | 0.82 | 0.98 |
| mir-3p     | hsa-miR-3158-3p         | 0.09  | 3.71  | 0.05 | 0.82 | 0.98 |
| scRNA      | HY4-L97                 | -0.05 | 8.74  | 0.05 | 0.82 | 0.98 |
| mir-3p     | hsa-miR-139-3p          | -0.08 | 3.31  | 0.05 | 0.82 | 0.98 |
| scRNA      | HY3-L45                 | 0.11  | 3.48  | 0.05 | 0.82 | 0.98 |
| scRNA      | HY4-L39                 | 0.07  | 3.89  | 0.05 | 0.82 | 0.98 |
| scRNA      | HY4-L89                 | 0.07  | 8.76  | 0.05 | 0.82 | 0.98 |
| mir-3p     | hsa-miR-103a-3p-L2      | 0.07  | 3.33  | 0.05 | 0.83 | 0.98 |
| scRNA      | HY3-L120                | -0.09 | 2.34  | 0.05 | 0.83 | 0.98 |
| mir-3p     | hsa-miR-374c-3p         | 0.09  | 2.90  | 0.05 | 0.83 | 0.98 |
| rRNA       | 5S-L1115                | 0.14  | 1.30  | 0.05 | 0.83 | 0.98 |
| tRNA       | chr6.tRNA123-SerGCT     | -0.10 | 2.23  | 0.05 | 0.83 | 0.98 |
| scRNA      | HY4-L17                 | -0.04 | 10.67 | 0.05 | 0.83 | 0.98 |
| mir-3p     | hsa-miR-106b-3p         | 0.06  | 7.66  | 0.05 | 0.83 | 0.98 |
| tRNA       | chr10.tRNA6-ValTAC      | -0.13 | 1.49  | 0.05 | 0.83 | 0.98 |
| piRNA      | piR-61648-L7            | 0.07  | 4.08  | 0.04 | 0.83 | 0.98 |
| scRNA      | BC200-L88               | 0.10  | 1.65  | 0.04 | 0.84 | 0.98 |
| snoRNA     | ACA36                   | -0.21 | 1.90  | 0.04 | 0.84 | 0.98 |
| mir-3p     | hsa-miR-126-3p          | 0.04  | 11.12 | 0.04 | 0.84 | 0.98 |
| tRNA       | chr6.tRNA74-LeuCAA      | -0.09 | 2.43  | 0.04 | 0.84 | 0.98 |
| snoRNA     | U99                     | -0.11 | 3.13  | 0.04 | 0.84 | 0.98 |
| mir-5p3pno | hsa-miR-128             | -0.05 | 8.32  | 0.04 | 0.84 | 0.98 |
| mir-5p     | hsa-miR-30d-5p          | -0.04 | 10.84 | 0.04 | 0.84 | 0.98 |
| mir-3p     | hsa-miR-195-3p          | -0.10 | 1.91  | 0.04 | 0.84 | 0.98 |
| tRNA       | chr16.tRNA29-ProAGG     | 0.09  | 2.96  | 0.04 | 0.84 | 0.98 |
| mir-5p     | hsa-miR-125b-5p-L2      | -0.08 | 3.27  | 0.04 | 0.84 | 0.98 |
| mir-3p     | hsa-miR-92a-3p          | 0.05  | 11.39 | 0.04 | 0.84 | 0.98 |
| rRNA       | LSU-rRNA_Hsa-L143       | -0.05 | 5.07  | 0.04 | 0.84 | 0.98 |
| mir-5p3pno | hsa-miR-1908            | -0.10 | 3.10  | 0.04 | 0.84 | 0.98 |
| rRNA       | SSU-rRNA_Hsa-L30        | -0.04 | 11.12 | 0.04 | 0.84 | 0.98 |
| snoRNA     | HBII-251                | 0.04  | 3.81  | 0.04 | 0.85 | 0.98 |
| scRNA      | BC200-L76               | 0.10  | 2.55  | 0.04 | 0.85 | 0.98 |
| tRF5       | chr1.tRNA98-ValCAC-tRF5 | -0.10 | 2.65  | 0.04 | 0.85 | 0.98 |
| scRNA      | HY3-L62                 | -0.14 | 1.84  | 0.04 | 0.85 | 0.98 |
| scRNA      | HY5-L11                 | 0.07  | 5.18  | 0.04 | 0.85 | 0.98 |
| mir-3p     | hsa-miR-409-3p          | -0.08 | 5.71  | 0.04 | 0.85 | 0.98 |

|            |                        |       |       |      |      |      |
|------------|------------------------|-------|-------|------|------|------|
| snoRNA     | HBII-234               | -0.15 | 2.39  | 0.04 | 0.85 | 0.98 |
| scRNA      | HY4-L15                | -0.04 | 7.92  | 0.03 | 0.85 | 0.98 |
| scRNA      | BC200-L29              | -0.09 | 2.92  | 0.03 | 0.85 | 0.98 |
| mir-5p3pno | hsa-miR-760            | -0.07 | 2.39  | 0.03 | 0.85 | 0.98 |
| scRNA      | BC200-L148             | -0.14 | 2.11  | 0.03 | 0.85 | 0.98 |
| scRNA      | HY4-L142               | -0.06 | 3.10  | 0.03 | 0.86 | 0.98 |
| rRNA       | LSU-rRNA_Hsa-L132      | 0.05  | 10.51 | 0.03 | 0.86 | 0.98 |
| rRNA       | LSU-rRNA_Hsa-L162      | 0.08  | 2.42  | 0.03 | 0.86 | 0.98 |
| mir-5p3pno | hsa-miR-1468           | 0.11  | 2.31  | 0.03 | 0.86 | 0.98 |
| piRNA      | piR-32678              | -0.04 | 6.09  | 0.03 | 0.86 | 0.98 |
| mir-5p3pno | hsa-miR-3609           | -0.15 | 2.88  | 0.03 | 0.86 | 0.98 |
| tRNA       | chr1.tRNA102-PseudoTTC | -0.04 | 6.55  | 0.03 | 0.86 | 0.98 |
| rRNA       | 5S-L367                | 0.08  | 1.91  | 0.03 | 0.86 | 0.98 |
| tRNA       | chr13.tRNA4-GluCTC     | 0.07  | 2.04  | 0.03 | 0.86 | 0.98 |
| rRNA       | 5S-L1164               | 0.07  | 2.08  | 0.03 | 0.86 | 0.98 |
| scRNA      | HY4-L21                | -0.07 | 2.22  | 0.03 | 0.86 | 0.98 |
| scRNA      | BC200-L43              | -0.08 | 3.28  | 0.03 | 0.86 | 0.98 |
| mir-5p     | hsa-miR-766-5p         | -0.10 | 1.81  | 0.03 | 0.86 | 0.98 |
| mir-3p     | hsa-miR-628-3p         | 0.06  | 3.76  | 0.03 | 0.86 | 0.98 |
| mir-5p     | hsa-miR-16-5p-L2       | 0.06  | 8.44  | 0.03 | 0.87 | 0.98 |
| scRNA      | HY4-L28                | -0.04 | 6.48  | 0.03 | 0.87 | 0.98 |
| mir-5p     | hsa-miR-151a-5p        | 0.05  | 6.40  | 0.03 | 0.87 | 0.98 |
| scRNA      | HY1-L389               | 0.06  | 2.66  | 0.03 | 0.87 | 0.98 |
| mir-5p     | hsa-miR-27b-5p         | 0.11  | 1.72  | 0.03 | 0.87 | 0.98 |
| rRNA       | 5S-L935                | 0.08  | 2.94  | 0.03 | 0.87 | 0.98 |
| piRNA      | piR-33082              | -0.04 | 7.18  | 0.03 | 0.87 | 0.98 |
| snoRNA     | HBII-55                | -0.10 | 4.50  | 0.03 | 0.87 | 0.98 |
| scRNA      | HY4-L53                | -0.04 | 3.75  | 0.03 | 0.87 | 0.98 |
| mir-5p     | hsa-miR-3679-5p        | 0.08  | 2.94  | 0.03 | 0.87 | 0.98 |
| snRNA      | U1-L24                 | 0.07  | 2.67  | 0.03 | 0.87 | 0.98 |
| tRNA       | chr1.tRNA134-GluTTC    | 0.03  | 7.45  | 0.02 | 0.88 | 0.98 |
| rRNA       | LSU-rRNA_Hsa-L383      | 0.03  | 14.16 | 0.02 | 0.88 | 0.98 |
| tRNA       | chr3.tRNA7-CysGCA      | -0.08 | 1.80  | 0.02 | 0.88 | 0.98 |
| tRNA       | chr6.tRNA172-SerTGA    | -0.15 | 1.90  | 0.02 | 0.88 | 0.98 |
| scRNA      | HY4-L3                 | -0.06 | 2.42  | 0.02 | 0.88 | 0.98 |
| scRNA      | HY4-L160               | -0.03 | 7.28  | 0.02 | 0.88 | 0.98 |
| rRNA       | LSU-rRNA_Hsa-L165      | -0.05 | 7.53  | 0.02 | 0.88 | 0.98 |
| piRNA      | piR-35413-L2           | -0.07 | 1.56  | 0.02 | 0.88 | 0.98 |
| rRNA       | LSU-rRNA_Hsa-L247      | 0.07  | 1.53  | 0.02 | 0.88 | 0.98 |
| rRNA       | 5S-L126                | 0.06  | 2.55  | 0.02 | 0.88 | 0.98 |
| mir-5p3pno | hsa-miR-1284           | -0.07 | 1.70  | 0.02 | 0.88 | 0.98 |
| mir-5p     | hsa-miR-20b-5p         | 0.06  | 3.49  | 0.02 | 0.89 | 0.98 |
| mir-3p     | hsa-miR-323a-3p        | 0.07  | 3.26  | 0.02 | 0.89 | 0.98 |

|            |                            |       |       |      |      |      |
|------------|----------------------------|-------|-------|------|------|------|
| rRNA       | SSU-rRNA_Hsa-L25           | -0.04 | 4.08  | 0.02 | 0.89 | 0.98 |
| tRNA       | chr5.tRNA15-ValAAC         | 0.05  | 4.70  | 0.02 | 0.89 | 0.98 |
| snoRNA     | ACA18                      | 0.08  | 2.07  | 0.02 | 0.89 | 0.98 |
| scRNA      | BC200-L54                  | 0.05  | 4.73  | 0.02 | 0.89 | 0.98 |
| scRNA      | HY4-L120                   | -0.03 | 9.92  | 0.02 | 0.89 | 0.98 |
| mir-3p     | hsa-miR-2355-3p            | 0.07  | 1.86  | 0.02 | 0.89 | 0.98 |
| mir-5p     | hsa-miR-335-5p             | -0.04 | 3.57  | 0.02 | 0.89 | 0.98 |
| tRNA       | chr5.tRNA4-ValAAC          | -0.07 | 2.29  | 0.02 | 0.89 | 0.98 |
| piRNA      | piR-49143                  | -0.03 | 11.96 | 0.02 | 0.89 | 0.98 |
| tRF3       | chr20.tRNA4-PseudoTAA-tRF3 | 0.04  | 4.75  | 0.02 | 0.89 | 0.98 |
| scRNA      | HY1-L103                   | -0.06 | 2.46  | 0.02 | 0.89 | 0.98 |
| tRF5       | chr6.tRNA129-MetCAT-tRF5   | 0.06  | 2.00  | 0.02 | 0.89 | 0.98 |
| scRNA      | BC200-L114                 | -0.07 | 2.21  | 0.02 | 0.90 | 0.98 |
| mir-3p     | hsa-miR-185-3p             | 0.05  | 2.98  | 0.02 | 0.90 | 0.98 |
| mir-3p     | hsa-miR-150-3p             | -0.06 | 2.88  | 0.02 | 0.90 | 0.98 |
| snRNA      | U1-L4                      | -0.05 | 8.27  | 0.02 | 0.90 | 0.98 |
| mir-5p3pno | hsa-miR-451a               | -0.04 | 12.70 | 0.02 | 0.90 | 0.98 |
| mir-3p     | hsa-miR-339-3p             | 0.04  | 2.88  | 0.02 | 0.90 | 0.98 |
| piRNA      | piR-53659                  | -0.15 | 2.18  | 0.02 | 0.90 | 0.98 |
| snRNA      | U4-L24                     | 0.08  | 1.61  | 0.02 | 0.90 | 0.98 |
| snoRNA     | U95                        | 0.04  | 6.95  | 0.01 | 0.90 | 0.98 |
| scRNA      | HY1-L28                    | 0.08  | 1.58  | 0.01 | 0.90 | 0.98 |
| mir-5p     | hsa-miR-4433-5p            | 0.05  | 5.15  | 0.01 | 0.90 | 0.98 |
| rRNA       | LSU-rRNA_Hsa-L252          | 0.04  | 2.99  | 0.01 | 0.90 | 0.98 |
| piRNA      | piR-33650                  | 0.06  | 3.05  | 0.01 | 0.90 | 0.98 |
| snoRNA     | ACA8                       | 0.09  | 2.21  | 0.01 | 0.90 | 0.98 |
| piRNA      | piR-58356                  | -0.04 | 5.40  | 0.01 | 0.90 | 0.98 |
| mir-5p     | hsa-miR-98-5p              | -0.03 | 6.17  | 0.01 | 0.90 | 0.98 |
| mir-3p     | hsa-miR-24-3p              | -0.03 | 8.44  | 0.01 | 0.90 | 0.98 |
| rRNA       | 5S-L1255                   | 0.06  | 1.70  | 0.01 | 0.91 | 0.98 |
| rRNA       | 5S-L957                    | 0.06  | 1.43  | 0.01 | 0.91 | 0.98 |
| scRNA      | HY1-L37                    | 0.03  | 6.31  | 0.01 | 0.91 | 0.98 |
| piRNA      | piR-35469                  | 0.06  | 1.70  | 0.01 | 0.91 | 0.98 |
| mir-3p     | hsa-miR-3529-3p            | -0.03 | 7.65  | 0.01 | 0.91 | 0.98 |
| scRNA      | HY4-L111                   | -0.02 | 9.50  | 0.01 | 0.91 | 0.98 |
| mir-5p     | hsa-miR-23b-5p             | 0.08  | 1.51  | 0.01 | 0.91 | 0.98 |
| rRNA       | LSU-rRNA_Hsa-L375          | 0.04  | 10.09 | 0.01 | 0.91 | 0.98 |
| snRNA      | U1-L43                     | -0.05 | 1.93  | 0.01 | 0.91 | 0.98 |
| tRNA       | chr7.tRNA21-CysGCA         | 0.06  | 1.68  | 0.01 | 0.91 | 0.98 |
| snoRNA     | U45B                       | -0.07 | 2.57  | 0.01 | 0.91 | 0.98 |
| mir-5p3pno | hsa-miR-3168               | 0.09  | 2.09  | 0.01 | 0.91 | 0.98 |
| mir-5p     | hsa-miR-23a-5p             | 0.05  | 1.78  | 0.01 | 0.91 | 0.98 |
| rRNA       | LSU-rRNA_Hsa-L365          | -0.07 | 1.60  | 0.01 | 0.91 | 0.98 |

|            |                          |       |      |      |      |      |
|------------|--------------------------|-------|------|------|------|------|
| snoRNA     | snR38B                   | -0.08 | 3.26 | 0.01 | 0.91 | 0.98 |
| tRNA       | chr17.tRNA41-SerCGA      | -0.08 | 2.38 | 0.01 | 0.91 | 0.98 |
| snRNA      | U2-L218                  | -0.06 | 1.63 | 0.01 | 0.91 | 0.98 |
| scRNA      | HY3-L372                 | -0.05 | 2.47 | 0.01 | 0.91 | 0.98 |
| mir-5p3pno | hsa-miR-1250             | -0.07 | 1.50 | 0.01 | 0.92 | 0.98 |
| rRNA       | 5S-L515                  | 0.04  | 2.06 | 0.01 | 0.92 | 0.98 |
| rRNA       | LSU-rRNA_Hsa-L345        | -0.06 | 2.84 | 0.01 | 0.92 | 0.98 |
| mir-3p     | hsa-miR-450a-3p          | 0.07  | 1.54 | 0.01 | 0.92 | 0.98 |
| tRNA       | chr2.tRNA14-TyrATA       | 0.05  | 3.30 | 0.01 | 0.92 | 0.98 |
| scRNA      | HY1-L69                  | 0.03  | 4.11 | 0.01 | 0.92 | 0.98 |
| snoRNA     | U33                      | 0.04  | 4.23 | 0.01 | 0.92 | 0.98 |
| tRF3       | chr16.tRNA31-PseudoTGG-t | -0.08 | 1.95 | 0.01 | 0.92 | 0.98 |
| snoRNA     | U18B                     | 0.06  | 2.75 | 0.01 | 0.92 | 0.98 |
| scRNA      | BC200-L146               | 0.06  | 2.61 | 0.01 | 0.92 | 0.98 |
| snoRNA     | HBII-85-8                | 0.06  | 2.22 | 0.01 | 0.92 | 0.98 |
| tRNA       | chr12.tRNA6-TrpCCA       | 0.04  | 2.86 | 0.01 | 0.92 | 0.98 |
| scRNA      | BC200-L72                | 0.09  | 1.58 | 0.01 | 0.92 | 0.99 |
| mir-5p     | hsa-miR-1255b-5p-L2      | -0.06 | 1.62 | 0.01 | 0.92 | 0.99 |
| mir-3p     | hsa-miR-340-3p           | 0.04  | 4.29 | 0.01 | 0.92 | 0.99 |
| rRNA       | LSU-rRNA_Hsa-L124        | -0.04 | 2.33 | 0.01 | 0.92 | 0.99 |
| mir-5p3pno | hsa-miR-543              | -0.04 | 5.86 | 0.01 | 0.92 | 0.99 |
| piRNA      | piR-31638                | -0.06 | 1.74 | 0.01 | 0.92 | 0.99 |
| rRNA       | SSU-rRNA_Hsa-L34         | 0.03  | 5.52 | 0.01 | 0.93 | 0.99 |
| scRNA      | HY1-L171                 | -0.05 | 1.68 | 0.01 | 0.93 | 0.99 |
| scRNA      | HY4-L162                 | 0.04  | 1.65 | 0.01 | 0.93 | 0.99 |
| scRNA      | HY4-L107                 | -0.02 | 9.96 | 0.01 | 0.93 | 0.99 |
| tRNA       | chr16.tRNA19-GlyGCC      | 0.06  | 1.88 | 0.01 | 0.93 | 0.99 |
| mir-5p     | hsa-miR-199a-5p          | 0.02  | 6.35 | 0.01 | 0.93 | 0.99 |
| snoRNA     | ACA46                    | 0.05  | 2.20 | 0.01 | 0.93 | 0.99 |
| piRNA      | piR-35548-L2             | -0.03 | 7.18 | 0.01 | 0.93 | 0.99 |
| scRNA      | BC200-L91                | 0.06  | 1.97 | 0.01 | 0.93 | 0.99 |
| scRNA      | HY4-L35                  | 0.02  | 7.15 | 0.01 | 0.93 | 0.99 |
| scRNA      | HY1-L352                 | 0.07  | 1.78 | 0.01 | 0.93 | 0.99 |
| scRNA      | HY4-L100                 | 0.03  | 3.24 | 0.01 | 0.93 | 0.99 |
| mir-3p     | hsa-miR-29b-3p           | 0.04  | 2.25 | 0.01 | 0.93 | 0.99 |
| mir-3p     | hsa-miR-26b-3p           | -0.04 | 2.34 | 0.01 | 0.94 | 0.99 |
| rRNA       | 5S-L990                  | -0.02 | 3.08 | 0.01 | 0.94 | 0.99 |
| scRNA      | HY4-L126                 | 0.03  | 3.61 | 0.01 | 0.94 | 0.99 |
| tRF3       | chr9.tRNA6-AspGTC-trf3   | 0.03  | 1.45 | 0.01 | 0.94 | 0.99 |
| scRNA      | HY4-L36                  | 0.03  | 2.19 | 0.01 | 0.94 | 0.99 |
| rRNA       | LSU-rRNA_Hsa-L189        | -0.02 | 4.24 | 0.01 | 0.94 | 0.99 |
| mir-5p     | hsa-miR-93-5p            | -0.02 | 7.11 | 0.01 | 0.94 | 0.99 |
| snoRNA     | E3                       | -0.03 | 2.67 | 0.01 | 0.94 | 0.99 |



|            |                           |       |       |      |      |      |
|------------|---------------------------|-------|-------|------|------|------|
| snoRNA     | HBII-85-3                 | -0.09 | 2.58  | 0.01 | 0.94 | 0.99 |
| snoRNA     | HBII-429                  | -0.04 | 4.20  | 0.01 | 0.94 | 0.99 |
| rRNA       | LSU-rRNA_Hsa-L29          | 0.02  | 2.54  | 0.01 | 0.94 | 0.99 |
| rRNA       | LSU-rRNA_Hsa-L297         | -0.04 | 1.90  | 0.01 | 0.94 | 0.99 |
| piRNA      | piR-31987                 | 0.03  | 6.33  | 0.00 | 0.94 | 0.99 |
| scRNA      | HY4-L20                   | 0.02  | 3.35  | 0.00 | 0.95 | 0.99 |
| scRNA      | HY1-L190                  | -0.03 | 2.42  | 0.00 | 0.95 | 0.99 |
| tRF3       | chr17.tRNA33-PseudoTTG-tF | 0.03  | 4.41  | 0.00 | 0.95 | 0.99 |
| rRNA       | LSU-rRNA_Hsa-L403         | 0.01  | 9.95  | 0.00 | 0.95 | 0.99 |
| tRNA       | chr6.tRNA98-LeuAAG        | -0.04 | 2.93  | 0.00 | 0.95 | 0.99 |
| mir-3p     | hsa-let-7b-3p             | 0.02  | 3.86  | 0.00 | 0.95 | 0.99 |
| mir-5p     | hsa-miR-432-5p            | -0.03 | 5.13  | 0.00 | 0.95 | 0.99 |
| scRNA      | HY4-L46                   | -0.01 | 9.09  | 0.00 | 0.95 | 0.99 |
| rRNA       | 5S-L621                   | -0.06 | 1.23  | 0.00 | 0.95 | 0.99 |
| mir-3p     | hsa-miR-335-3p            | -0.03 | 3.66  | 0.00 | 0.95 | 0.99 |
| tRNA       | chr6.tRNA128-GlyGCC       | 0.02  | 4.35  | 0.00 | 0.95 | 0.99 |
| scRNA      | HY3-L287                  | 0.04  | 1.40  | 0.00 | 0.95 | 0.99 |
| mir-5p     | hsa-miR-191-5p            | 0.01  | 8.87  | 0.00 | 0.95 | 0.99 |
| scRNA      | BC200-L155                | -0.03 | 2.70  | 0.00 | 0.95 | 0.99 |
| snoRNA     | HBII-166                  | 0.02  | 3.05  | 0.00 | 0.96 | 0.99 |
| snRNA      | U2-L128                   | -0.02 | 7.39  | 0.00 | 0.96 | 0.99 |
| scRNA      | BC200-L46                 | 0.05  | 1.64  | 0.00 | 0.96 | 0.99 |
| scRNA      | BC200-L68                 | -0.03 | 2.33  | 0.00 | 0.96 | 0.99 |
| rRNA       | LSU-rRNA_Hsa-L15          | 0.01  | 6.48  | 0.00 | 0.96 | 0.99 |
| snRNA      | U2-L240                   | -0.03 | 3.38  | 0.00 | 0.96 | 0.99 |
| snoRNA     | HBII-135                  | -0.02 | 5.06  | 0.00 | 0.96 | 0.99 |
| scRNA      | HY4-L139                  | -0.01 | 10.83 | 0.00 | 0.97 | 1    |
| scRNA      | HY3-L525                  | 0.04  | 1.38  | 0.00 | 0.97 | 1    |
| mir-3p     | hsa-miR-200c-3p           | -0.02 | 2.75  | 0.00 | 0.97 | 1    |
| tRNA       | chr17.tRNA12-TrpCCA       | 0.02  | 2.18  | 0.00 | 0.97 | 1    |
| scRNA      | HY4-L71                   | 0.01  | 5.97  | 0.00 | 0.97 | 1    |
| snoRNA     | ACA45                     | 0.01  | 6.69  | 0.00 | 0.98 | 1    |
| mir-3p     | hsa-miR-499b-3p           | -0.01 | 3.26  | 0.00 | 0.98 | 1    |
| snRNA      | U7-L52                    | -0.01 | 6.85  | 0.00 | 0.98 | 1    |
| rRNA       | 5S-L986                   | -0.01 | 1.69  | 0.00 | 0.98 | 1    |
| scRNA      | BC200-L4                  | -0.01 | 3.40  | 0.00 | 0.98 | 1    |
| mir-5p     | hsa-miR-493-5p            | 0.01  | 4.61  | 0.00 | 0.98 | 1    |
| mir-5p3pno | hsa-miR-451b              | -0.01 | 2.85  | 0.00 | 0.98 | 1    |
| snoRNA     | ACA3-2                    | 0.02  | 2.59  | 0.00 | 0.98 | 1    |
| piRNA      | piR-48772-L2              | 0.02  | 1.95  | 0.00 | 0.98 | 1    |
| tRNA       | chr1.tRNA81-AspGTC        | 0.01  | 4.35  | 0.00 | 0.98 | 1    |
| mir-5p     | hsa-miR-485-5p            | -0.01 | 4.20  | 0.00 | 0.98 | 1    |
| rRNA       | LSU-rRNA_Hsa-L147         | -0.01 | 2.70  | 0.00 | 0.98 | 1    |

|            |                        |       |      |      |      |   |
|------------|------------------------|-------|------|------|------|---|
| mir-5p     | hsa-miR-660-5p         | -0.01 | 3.50 | 0.00 | 0.98 | 1 |
| mir-5p     | hsa-miR-126-5p         | -0.01 | 6.05 | 0.00 | 0.98 | 1 |
| rRNA       | 5S-L137                | -0.01 | 1.95 | 0.00 | 0.98 | 1 |
| mir-5p3pno | hsa-miR-651            | -0.01 | 3.29 | 0.00 | 0.98 | 1 |
| mir-5p3pno | hsa-miR-1290           | 0.03  | 2.06 | 0.00 | 0.98 | 1 |
| scRNA      | HY4-L56                | 0.00  | 1.82 | 0.00 | 0.98 | 1 |
| scRNA      | BC200-L9               | 0.00  | 2.83 | 0.00 | 0.99 | 1 |
| rRNA       | 5S-L115                | 0.00  | 1.96 | 0.00 | 0.99 | 1 |
| snRNA      | U6-L503                | -0.01 | 1.31 | 0.00 | 0.99 | 1 |
| scRNA      | BC200-L36              | 0.01  | 2.68 | 0.00 | 0.99 | 1 |
| mir-5p3pno | hsa-miR-3672           | 0.00  | 1.53 | 0.00 | 0.99 | 1 |
| scRNA      | HY1-L167               | 0.00  | 2.48 | 0.00 | 0.99 | 1 |
| rRNA       | LSU-rRNA_Hsa-L309      | 0.00  | 8.19 | 0.00 | 0.99 | 1 |
| rRNA       | 5S-L95                 | -0.01 | 1.71 | 0.00 | 0.99 | 1 |
| tRNA       | chr14.tRNA10-IleAAT    | 0.01  | 1.41 | 0.00 | 0.99 | 1 |
| tRNA       | chr6.tRNA75-MetCAT     | -0.01 | 1.36 | 0.00 | 0.99 | 1 |
| mir-5p3pno | hsa-miR-181d           | 0.00  | 3.90 | 0.00 | 0.99 | 1 |
| mir-5p3pno | hsa-miR-320e           | 0.00  | 1.85 | 0.00 | 0.99 | 1 |
| rRNA       | LSU-rRNA_Hsa-L42       | 0.00  | 1.88 | 0.00 | 0.99 | 1 |
| mir-5p3pno | hsa-miR-3615           | 0.00  | 7.34 | 0.00 | 0.99 | 1 |
| mir-5p     | hsa-miR-106b-5p        | 0.00  | 3.53 | 0.00 | 0.99 | 1 |
| piRNA      | piR-35548-L3           | 0.01  | 2.78 | 0.00 | 0.99 | 1 |
| mir-3p     | hsa-miR-342-3p         | 0.00  | 3.63 | 0.00 | 1.00 | 1 |
| mir-3p     | hsa-miR-502-3p         | 0.00  | 2.26 | 0.00 | 1.00 | 1 |
| rRNA       | LSU-rRNA_Hsa-L366      | 0.00  | 4.93 | 0.00 | 1.00 | 1 |
| rRNA       | LSU-rRNA_Hsa-L283      | 0.03  | 2.11 | 0.00 | 1.00 | 1 |
| mir-3p     | hsa-miR-19a-3p         | 0.00  | 4.16 | 0.00 | 1.00 | 1 |
| mir-5p     | hsa-miR-425-5p         | 0.00  | 5.12 | 0.00 | 1.00 | 1 |
| mir-3p     | hsa-miR-29c-3p         | 0.00  | 1.99 | 0.00 | 1.00 | 1 |
| tRNA       | chr16.tRNA13-PseudoCTT | 0.00  | 4.70 | 0.00 | 1.00 | 1 |

**Supplementary Table 3: RNA correlations with baseline DAS28-ESR scores**

| <i>RNA type</i> | <i>ID</i>                   | <i>Average read count (log2 CPM)</i> | <i>Correlation coefficient</i> | <i>P-value</i> | <i>Adjusted P-value</i> |
|-----------------|-----------------------------|--------------------------------------|--------------------------------|----------------|-------------------------|
| miRNA           | hsa-miR-3609                | 2.88                                 | -0.89                          | 3.79E-05       | 5.64E-02                |
| tRNA            | chr1.tRNA131-GlyCCC         | 7.00                                 | 0.67                           | 1.50E-04       | 7.93E-02                |
| rRNA            | LSU-rRNA_Hsa-L130           | 4.63                                 | 0.86                           | 1.60E-04       | 7.93E-02                |
| snoRNA          | U102                        | 7.38                                 | -0.49                          | 2.46E-04       | 9.14E-02                |
| scRNA           | BC200-L76                   | 2.55                                 | 0.65                           | 5.73E-04       | 0.17                    |
| snoRNA          | U42A                        | 4.44                                 | -0.69                          | 7.32E-04       | 0.18                    |
| snoRNA          | U15B                        | 2.19                                 | -0.78                          | 9.40E-04       | 0.20                    |
| mir-5p          | hsa-miR-15b-5p              | 2.72                                 | -0.48                          | 1.17E-03       | 0.21                    |
| tRNA            | chr6.tRNA77-GluCTC          | 4.25                                 | 0.44                           | 1.28E-03       | 0.21                    |
| mir-3p          | hsa-miR-450a-3p             | 1.54                                 | -0.79                          | 1.79E-03       | 0.27                    |
| snoRNA          | U59B                        | 7.06                                 | -0.50                          | 2.30E-03       | 0.31                    |
| rRNA            | LSU-rRNA_Hsa-L15            | 6.48                                 | 0.29                           | 3.70E-03       | 0.34                    |
| rRNA            | 5S-L1179                    | 1.46                                 | 0.77                           | 3.72E-03       | 0.34                    |
| snRNA           | U2-L1074                    | 3.34                                 | 0.65                           | 3.85E-03       | 0.34                    |
| snoRNA          | HBII-295                    | 3.05                                 | -0.70                          | 3.98E-03       | 0.34                    |
| snoRNA          | U3-3                        | 2.21                                 | -0.91                          | 4.19E-03       | 0.34                    |
| piRNA           | piR-35548-L2                | 7.18                                 | -0.48                          | 4.22E-03       | 0.34                    |
| snoRNA          | SNORD119                    | 5.61                                 | -0.52                          | 4.31E-03       | 0.34                    |
| mir-5p3pno      | hsa-miR-203a                | 2.28                                 | -0.99                          | 4.32E-03       | 0.34                    |
| tRF5            | chr17.tRNA33-PseudoTTG-tRF5 | 5.92                                 | -0.41                          | 5.64E-03       | 0.40                    |
| snoRNA          | U20                         | 6.66                                 | -0.52                          | 5.65E-03       | 0.40                    |
| tRNA            | chr6.tRNA15-TyrGTA          | 5.52                                 | 0.48                           | 5.98E-03       | 0.40                    |
| tRNA            | chr14.tRNA8-CysGCA          | 4.27                                 | 0.85                           | 6.52E-03       | 0.41                    |
| snoRNA          | mgh28S-2409                 | 3.15                                 | -0.64                          | 6.72E-03       | 0.41                    |
| piRNA           | piR-52416-L2                | 2.28                                 | -0.57                          | 7.03E-03       | 0.41                    |
| snoRNA          | mgU6-77                     | 4.50                                 | -0.46                          | 7.71E-03       | 0.41                    |
| snoRNA          | U52                         | 2.73                                 | -0.58                          | 8.07E-03       | 0.41                    |
| piRNA           | piR-36716                   | 2.87                                 | -0.54                          | 8.19E-03       | 0.41                    |
| snoRNA          | SNORD127                    | 4.77                                 | -0.57                          | 8.26E-03       | 0.41                    |
| rRNA            | LSU-rRNA_Hsa-L385           | 8.75                                 | 0.28                           | 8.53E-03       | 0.41                    |
| scRNA           | HY5-L7                      | 2.29                                 | 0.52                           | 8.72E-03       | 0.41                    |
| piRNA           | piR-38502                   | 3.33                                 | -0.58                          | 9.06E-03       | 0.41                    |
| snoRNA          | HBII-239                    | 4.71                                 | -0.39                          | 9.10E-03       | 0.41                    |
| snoRNA          | E2                          | 2.14                                 | -0.67                          | 1.00E-02       | 0.41                    |
| rRNA            | LSU-rRNA_Hsa-L63            | 4.97                                 | 0.93                           | 1.01E-02       | 0.41                    |
| snoRNA          | HBII-429                    | 4.20                                 | -0.55                          | 1.02E-02       | 0.41                    |
| rRNA            | 5S-L189                     | 2.24                                 | 0.52                           | 1.07E-02       | 0.41                    |
| snRNA           | U2-L288                     | 2.57                                 | 0.45                           | 1.09E-02       | 0.41                    |

|            |                          |      |       |          |      |
|------------|--------------------------|------|-------|----------|------|
| rRNA       | LSU-rRNA_Hsa-L147        | 2.70 | 0.74  | 1.11E-02 | 0.41 |
| tRNA       | chr19.tRNA8-SeCTCA       | 5.87 | 0.26  | 1.11E-02 | 0.41 |
| tRNA       | chr7.tRNA7-CysGCA        | 7.06 | 0.42  | 1.15E-02 | 0.41 |
| rRNA       | 5S-L602                  | 5.12 | 0.33  | 1.16E-02 | 0.41 |
| mir-5p3pno | hsa-miR-1290             | 2.06 | 0.78  | 1.20E-02 | 0.41 |
| snRNA      | U2-L166                  | 3.45 | 0.96  | 1.22E-02 | 0.41 |
| rRNA       | SSU-rRNA_Hsa-L24         | 9.30 | 0.25  | 1.32E-02 | 0.42 |
| rRNA       | LSU-rRNA_Hsa-L64         | 1.52 | -0.64 | 1.33E-02 | 0.42 |
| snoRNA     | U66                      | 1.79 | -0.71 | 1.35E-02 | 0.42 |
| tRNA       | chr6.tRNA38-IleAAT       | 3.15 | 0.97  | 1.36E-02 | 0.42 |
| mir-3p     | hsa-miR-223-3p           | 7.30 | -0.34 | 1.40E-02 | 0.42 |
| snoRNA     | U50                      | 5.82 | -0.40 | 1.43E-02 | 0.42 |
| rRNA       | LSU-rRNA_Hsa-L257        | 4.58 | 0.47  | 1.47E-02 | 0.42 |
| snoRNA     | ACA58                    | 1.85 | -0.72 | 1.48E-02 | 0.42 |
| rRNA       | 5S-L1114                 | 1.68 | 0.48  | 1.53E-02 | 0.42 |
| piRNA      | piR-31068-L10            | 2.13 | -0.80 | 1.57E-02 | 0.42 |
| scRNA      | HY4-L152                 | 7.32 | 0.29  | 1.59E-02 | 0.42 |
| snoRNA     | U50B                     | 4.34 | -0.45 | 1.59E-02 | 0.42 |
| mir-5p     | hsa-miR-214-5p           | 1.57 | -0.69 | 1.65E-02 | 0.42 |
| tRNA       | chr17.tRNA3-GlnCTG       | 6.70 | 0.23  | 1.66E-02 | 0.42 |
| snRNA      | U2-L75                   | 4.87 | 0.58  | 1.67E-02 | 0.42 |
| snRNA      | U2-L240                  | 3.38 | 0.53  | 1.69E-02 | 0.42 |
| snoRNA     | U95                      | 6.95 | -0.34 | 1.76E-02 | 0.43 |
| snoRNA     | U41                      | 2.49 | -0.59 | 1.91E-02 | 0.43 |
| snRNA      | U3-L78                   | 4.40 | -0.41 | 1.92E-02 | 0.43 |
| mir-5p3pno | hsa-miR-1246             | 5.82 | 0.53  | 1.93E-02 | 0.43 |
| snoRNA     | HBII-202                 | 6.44 | -0.48 | 1.99E-02 | 0.43 |
| mir-3p     | hsa-miR-324-3p           | 1.81 | 0.52  | 2.00E-02 | 0.43 |
| rRNA       | LSU-rRNA_Hsa-L41         | 1.50 | -0.71 | 2.02E-02 | 0.43 |
| snoRNA     | U18A                     | 6.81 | -0.44 | 2.06E-02 | 0.43 |
| tRNA       | chr6.tRNA4-ArgTCG        | 2.79 | 0.61  | 2.16E-02 | 0.43 |
| snoRNA     | ACA20                    | 2.31 | -0.56 | 2.17E-02 | 0.43 |
| snoRNA     | HBII-142                 | 3.42 | -0.49 | 2.17E-02 | 0.43 |
| snRNA      | U2-L550                  | 2.12 | 0.75  | 2.22E-02 | 0.43 |
| snoRNA     | U31                      | 7.96 | -0.34 | 2.26E-02 | 0.43 |
| piRNA      | piR-31935                | 4.57 | 0.30  | 2.27E-02 | 0.43 |
| rRNA       | LSU-rRNA_Hsa-L403        | 9.95 | 0.21  | 2.28E-02 | 0.43 |
| tRF5       | chr1.tRNA130-ValCAC-tRF5 | 2.38 | 0.43  | 2.33E-02 | 0.43 |
| mir-5p     | hsa-miR-3606-5p          | 2.63 | 0.76  | 2.41E-02 | 0.43 |
| tRNA       | chr11.tRNA11-LysTTT      | 7.37 | 0.41  | 2.42E-02 | 0.43 |
| snoRNA     | U62B                     | 3.72 | -0.44 | 2.46E-02 | 0.43 |
| snoRNA     | U23                      | 1.46 | 0.53  | 2.51E-02 | 0.43 |
| mir-3p     | hsa-miR-18a-3p           | 2.18 | -0.45 | 2.55E-02 | 0.43 |

|            |                          |       |       |          |      |
|------------|--------------------------|-------|-------|----------|------|
| snRNA      | U2-L1061                 | 11.07 | 0.44  | 2.57E-02 | 0.43 |
| mir-5p3pno | hsa-miR-1244-L2          | 1.66  | 0.65  | 2.59E-02 | 0.43 |
| tRNA       | chr6.tRNA88-PseudoGAA    | 8.20  | 0.32  | 2.59E-02 | 0.43 |
| snoRNA     | U33                      | 4.23  | -0.34 | 2.60E-02 | 0.43 |
| snRNA      | U7-L159                  | 1.62  | 0.62  | 2.61E-02 | 0.43 |
| rRNA       | LSU-rRNA_Hsa-L19         | 2.10  | 0.47  | 2.63E-02 | 0.43 |
| piRNA      | piR-31638-L3             | 7.00  | -0.34 | 2.64E-02 | 0.43 |
| mir-3p     | hsa-miR-24-3p            | 8.44  | -0.24 | 2.65E-02 | 0.43 |
| scRNA      | BC200-L134               | 1.43  | 0.61  | 2.69E-02 | 0.43 |
| snoRNA     | ACA61                    | 2.02  | 0.58  | 2.70E-02 | 0.43 |
| mir-5p3pno | hsa-miR-181d             | 3.90  | -0.25 | 2.71E-02 | 0.43 |
| snRNA      | U5-L108                  | 2.22  | 0.70  | 2.71E-02 | 0.43 |
| snRNA      | U2-L981                  | 4.06  | 0.47  | 2.72E-02 | 0.43 |
| snoRNA     | U63                      | 5.92  | -0.37 | 2.72E-02 | 0.43 |
| scRNA      | BC200-L139               | 3.27  | 0.35  | 2.78E-02 | 0.43 |
| snoRNA     | U81                      | 6.27  | -0.39 | 2.80E-02 | 0.43 |
| tRF5       | chr14.tRNA8-CysGCA-tRF5  | 2.18  | -0.60 | 2.86E-02 | 0.43 |
| scRNA      | BC200-L148               | 2.11  | 0.57  | 2.92E-02 | 0.43 |
| mir-5p3pno | hsa-miR-103b-L2          | 3.90  | -0.37 | 2.94E-02 | 0.43 |
| scRNA      | BC200-L161               | 1.53  | 0.60  | 3.00E-02 | 0.43 |
| scRNA      | HY1-L190                 | 2.42  | 0.42  | 3.05E-02 | 0.43 |
| piRNA      | piR-61298                | 1.91  | -0.81 | 3.08E-02 | 0.43 |
| snoRNA     | U60                      | 4.22  | -0.39 | 3.09E-02 | 0.43 |
| rRNA       | 5S-L105                  | 5.89  | 0.24  | 3.11E-02 | 0.43 |
| tRF5       | chr6.tRNA78-LeuAAG-tRF5  | 1.31  | 0.68  | 3.14E-02 | 0.43 |
| snRNA      | U3-L74                   | 2.45  | -0.55 | 3.14E-02 | 0.43 |
| snoRNA     | U49B                     | 1.62  | -0.65 | 3.15E-02 | 0.43 |
| scRNA      | HY1-L442                 | 1.33  | -0.60 | 3.23E-02 | 0.44 |
| snoRNA     | HBII-251                 | 3.81  | -0.63 | 3.30E-02 | 0.44 |
| snoRNA     | SNORD126                 | 2.74  | -0.45 | 3.31E-02 | 0.44 |
| snoRNA     | HBII-85-3                | 2.58  | -0.71 | 3.31E-02 | 0.44 |
| snoRNA     | ACA36                    | 1.90  | -0.56 | 3.39E-02 | 0.44 |
| tRF3       | chr16.tRNA28-ProTGG-tRF3 | 1.99  | 0.64  | 3.39E-02 | 0.44 |
| snRNA      | U6-L1696                 | 1.91  | -0.51 | 3.41E-02 | 0.44 |
| snoRNA     | U48                      | 5.72  | -0.35 | 3.42E-02 | 0.44 |
| piRNA      | piR-35982-L6             | 1.98  | -0.79 | 3.44E-02 | 0.44 |
| snoRNA     | U45C                     | 2.62  | -0.48 | 3.52E-02 | 0.44 |
| snRNA      | U2-L1058                 | 6.70  | 0.39  | 3.54E-02 | 0.44 |
| mir-3p     | hsa-miR-493-3p           | 3.21  | -0.45 | 3.55E-02 | 0.44 |
| snRNA      | U2-L887                  | 6.33  | 0.34  | 3.55E-02 | 0.44 |
| snRNA      | U2-L603                  | 6.16  | 0.42  | 3.60E-02 | 0.44 |
| snoRNA     | U37                      | 1.76  | -0.86 | 3.60E-02 | 0.44 |
| tRNA       | chr17.tRNA18-ArgCCT      | 1.71  | 0.46  | 3.63E-02 | 0.44 |

|            |                          |       |       |          |      |
|------------|--------------------------|-------|-------|----------|------|
| snoRNA     | HBII-316                 | 2.03  | -0.54 | 3.76E-02 | 0.45 |
| snRNA      | U14-L2                   | 1.79  | -0.79 | 3.77E-02 | 0.45 |
| mir-5p3pno | hsa-miR-1-L2             | 4.82  | -0.35 | 3.95E-02 | 0.46 |
| snoRNA     | U101                     | 5.22  | -0.33 | 3.96E-02 | 0.46 |
| mir-5p3pno | hsa-miR-487b             | 1.50  | -0.76 | 3.99E-02 | 0.46 |
| tRF3       | chr6.tRNA61-MetCAT-tRF3  | 2.22  | 0.64  | 4.05E-02 | 0.46 |
| snoRNA     | U58C                     | 3.37  | -0.44 | 4.06E-02 | 0.46 |
| mir-5p     | hsa-miR-338-5p           | 4.39  | -0.32 | 4.12E-02 | 0.46 |
| tRF5       | chr17.tRNA21-ArgCCT-tRF5 | 1.46  | 0.63  | 4.19E-02 | 0.47 |
| mir-5p3pno | hsa-miR-6073             | 1.46  | 0.51  | 4.24E-02 | 0.47 |
| snoRNA     | U32A                     | 4.08  | -0.45 | 4.27E-02 | 0.47 |
| mir-5p     | hsa-miR-132-5p           | 2.49  | -0.46 | 4.27E-02 | 0.47 |
| mir-3p     | hsa-miR-4433-3p          | 2.78  | -0.42 | 4.35E-02 | 0.47 |
| snoRNA     | U55                      | 5.84  | -0.37 | 4.38E-02 | 0.47 |
| mir-5p     | hsa-miR-23b-5p           | 1.51  | -0.60 | 4.40E-02 | 0.47 |
| mir-5p     | hsa-miR-106b-5p          | 3.53  | -0.28 | 4.40E-02 | 0.47 |
| tRNA       | chr6.tRNA122-PseudoTGC   | 2.61  | 0.48  | 4.41E-02 | 0.47 |
| tRF5       | chr16.tRNA23-LysTTT-tRF5 | 3.56  | 0.45  | 4.56E-02 | 0.47 |
| scRNA      | HY3-L525                 | 1.38  | -0.51 | 4.57E-02 | 0.47 |
| tRNA       | chr6.tRNA168-TrpCCA      | 2.05  | -0.54 | 4.57E-02 | 0.47 |
| snRNA      | U2-L250                  | 12.48 | 0.42  | 4.65E-02 | 0.47 |
| tRNA       | chr6.tRNA148-SerTGA      | 3.55  | 0.53  | 4.66E-02 | 0.47 |
| snoRNA     | U105B                    | 4.75  | -0.43 | 4.68E-02 | 0.47 |
| tRNA       | chr6.tRNA143-LysTTT      | 5.55  | 0.33  | 4.69E-02 | 0.47 |
| snoRNA     | HBII-276                 | 3.49  | -0.45 | 4.71E-02 | 0.47 |
| rRNA       | 5S-L997                  | 1.97  | 0.63  | 4.82E-02 | 0.48 |
| snoRNA     | U74                      | 5.78  | -0.39 | 4.86E-02 | 0.48 |
| rRNA       | 5S-L472                  | 2.70  | 0.37  | 5.03E-02 | 0.49 |
| snRNA      | U2-L386                  | 2.89  | 0.49  | 5.03E-02 | 0.49 |
| tRNA       | chr12.tRNA5-AspGTC       | 4.66  | 0.27  | 5.04E-02 | 0.49 |
| scRNA      | HY1-L302                 | 2.49  | -0.31 | 5.08E-02 | 0.49 |
| scRNA      | BC200-L85                | 1.96  | 0.48  | 5.19E-02 | 0.49 |
| snRNA      | U2-L825                  | 3.19  | 0.39  | 5.20E-02 | 0.49 |
| tRNA       | chr1.tRNA79-GlyTCC       | 1.87  | 0.49  | 5.23E-02 | 0.49 |
| mir-5p     | hsa-miR-6723-5p          | 4.58  | -0.35 | 5.24E-02 | 0.49 |
| tRF3       | chr6.tRNA153-IleAAT-tRF3 | 2.68  | 0.53  | 5.33E-02 | 0.49 |
| snoRNA     | HBII-166                 | 3.05  | -0.47 | 5.34E-02 | 0.49 |
| snRNA      | U2-L537                  | 2.76  | 0.47  | 5.42E-02 | 0.49 |
| mir-3p     | hsa-miR-424-3p           | 4.70  | -0.29 | 5.43E-02 | 0.49 |
| rRNA       | LSU-rRNA_Hsa-L185        | 2.41  | 0.49  | 5.53E-02 | 0.50 |
| tRNA       | chr5.tRNA15-ValAAC       | 4.70  | -0.25 | 5.54E-02 | 0.50 |
| rRNA       | LSU-rRNA_Hsa-L297        | 1.90  | -0.48 | 5.55E-02 | 0.50 |
| rRNA       | 5S-L1234                 | 5.10  | 0.25  | 5.61E-02 | 0.50 |

|            |                            |       |       |          |      |
|------------|----------------------------|-------|-------|----------|------|
| snRNA      | U3-L18                     | 6.00  | 0.28  | 5.62E-02 | 0.50 |
| snRNA      | U2-L405                    | 3.55  | 0.46  | 5.75E-02 | 0.50 |
| tRF3       | chr3.tRNA2-ValAAC-tRF3     | 4.15  | 0.35  | 5.75E-02 | 0.50 |
| piRNA      | piR-35548-L4               | 7.22  | -0.26 | 5.77E-02 | 0.50 |
| snoRNA     | U21                        | 4.61  | -0.38 | 5.78E-02 | 0.50 |
| snRNA      | U3-L79                     | 3.27  | -0.41 | 5.83E-02 | 0.50 |
| mir-5p3pno | hsa-miR-543                | 5.86  | -0.34 | 5.84E-02 | 0.50 |
| mir-5p     | hsa-miR-3679-5p            | 2.94  | 0.35  | 5.88E-02 | 0.50 |
| scRNA      | BC200-L108                 | 2.02  | 0.39  | 5.97E-02 | 0.50 |
| mir-5p3pno | hsa-miR-128                | 8.32  | -0.23 | 5.97E-02 | 0.50 |
| rRNA       | LSU-rRNA_Hsa-L18           | 5.98  | 0.33  | 6.06E-02 | 0.50 |
| snRNA      | U2-L342                    | 5.41  | 0.38  | 6.08E-02 | 0.50 |
| mir-5p     | hsa-miR-16-5p-L2           | 8.44  | -0.27 | 6.27E-02 | 0.51 |
| scRNA      | HY4-L151                   | 2.39  | 0.29  | 6.30E-02 | 0.51 |
| tRNA       | chr6.tRNA11-IleAAT         | 8.31  | 0.40  | 6.39E-02 | 0.51 |
| tRNA       | chr16.tRNA31-PseudoTGG     | 3.01  | 0.40  | 6.43E-02 | 0.51 |
| snoRNA     | U79                        | 1.72  | -0.56 | 6.52E-02 | 0.51 |
| snoRNA     | ACA11                      | 2.12  | -0.42 | 6.52E-02 | 0.51 |
| rRNA       | LSU-rRNA_Hsa-L132          | 10.51 | 0.18  | 6.53E-02 | 0.51 |
| rRNA       | SSU-rRNA_Hsa-L67           | 3.08  | -0.38 | 6.54E-02 | 0.51 |
| scRNA      | BC200-L68                  | 2.33  | 0.51  | 6.55E-02 | 0.51 |
| mir-5p     | hsa-miR-574-5p             | 4.85  | 0.26  | 6.57E-02 | 0.51 |
| rRNA       | LSU-rRNA_Hsa-L300          | 7.63  | -0.36 | 6.57E-02 | 0.51 |
| snRNA      | U2-L532                    | 3.08  | 0.48  | 6.61E-02 | 0.51 |
| snoRNA     | ACA3                       | 2.48  | 0.33  | 6.66E-02 | 0.52 |
| mir-3p     | hsa-miR-495-3p             | 2.88  | -0.44 | 6.80E-02 | 0.52 |
| rRNA       | LSU-rRNA_Hsa-L355          | 3.31  | -0.31 | 6.90E-02 | 0.53 |
| snoRNA     | U44                        | 6.36  | -0.30 | 6.95E-02 | 0.53 |
| scRNA      | BC200-L38                  | 1.58  | -0.61 | 6.99E-02 | 0.53 |
| mir-3p     | hsa-miR-25-3p              | 12.18 | -0.19 | 7.00E-02 | 0.53 |
| mir-3p     | hsa-miR-19b-3p             | 4.04  | -0.28 | 7.09E-02 | 0.53 |
| snRNA      | U2-L615                    | 13.00 | 0.41  | 7.12E-02 | 0.53 |
| tRNA       | chr16.tRNA19-GlyGCC        | 1.88  | 0.64  | 7.17E-02 | 0.53 |
| mir-5p     | hsa-miR-411-5p             | 2.70  | -0.48 | 7.19E-02 | 0.53 |
| snoRNA     | U103B                      | 3.29  | -0.43 | 7.20E-02 | 0.53 |
| snoRNA     | U58A                       | 5.02  | -0.32 | 7.23E-02 | 0.53 |
| tRF3       | chr3.tRNA10-PseudoCTC-tRF3 | 1.55  | 0.72  | 7.24E-02 | 0.53 |
| rRNA       | LSU-rRNA_Hsa-L350          | 10.47 | 0.17  | 7.30E-02 | 0.53 |
| rRNA       | 5S-L688                    | 4.43  | 0.24  | 7.35E-02 | 0.53 |
| mir-5p     | hsa-miR-223-5p             | 8.71  | -0.21 | 7.39E-02 | 0.53 |
| snoRNA     | mgh18S-121                 | 1.93  | -0.69 | 7.41E-02 | 0.53 |
| mir-5p     | hsa-miR-654-5p             | 3.09  | -0.38 | 7.45E-02 | 0.53 |
| mir-5p     | hsa-miR-146a-5p            | 9.39  | -0.20 | 7.47E-02 | 0.53 |

|        |                             |       |       |          |      |
|--------|-----------------------------|-------|-------|----------|------|
| snoRNA | U64                         | 2.08  | -0.43 | 7.49E-02 | 0.53 |
| tRNA   | chr17.tRNA12-TrpCCA         | 2.18  | 0.37  | 7.78E-02 | 0.54 |
| snoRNA | U80                         | 3.36  | 0.34  | 7.83E-02 | 0.54 |
| snoRNA | HBII-382                    | 2.17  | -0.50 | 7.89E-02 | 0.54 |
| rRNA   | SSU-rRNA_Hsa-L73            | 14.22 | 0.15  | 7.89E-02 | 0.54 |
| mir-3p | hsa-miR-221-3p              | 7.16  | -0.22 | 7.91E-02 | 0.54 |
| snoRNA | HBII-13                     | 3.91  | -0.51 | 7.96E-02 | 0.55 |
| piRNA  | piR-61648                   | 2.28  | 0.29  | 8.01E-02 | 0.55 |
| rRNA   | LSU-rRNA_Hsa-L178           | 3.24  | 0.35  | 8.09E-02 | 0.55 |
| rRNA   | 5S-L762                     | 4.86  | 0.21  | 8.25E-02 | 0.55 |
| scRNA  | HY1-L276                    | 3.15  | 0.24  | 8.27E-02 | 0.55 |
| snoRNA | U73a                        | 1.79  | -0.56 | 8.28E-02 | 0.55 |
| mir-5p | hsa-miR-379-5p              | 5.35  | -0.28 | 8.31E-02 | 0.55 |
| snoRNA | U47                         | 3.87  | -0.38 | 8.41E-02 | 0.56 |
| scRNA  | HY5-L21                     | 11.03 | 0.22  | 8.61E-02 | 0.57 |
| scRNA  | BC200-L100                  | 1.69  | 0.67  | 8.67E-02 | 0.57 |
| mir-5p | hsa-miR-142-5p              | 5.73  | -0.23 | 8.68E-02 | 0.57 |
| scRNA  | HY1-L175                    | 2.06  | 0.45  | 8.73E-02 | 0.57 |
| tRF5   | chr1.tRNA125-PseudoGTT-tRF5 | 1.49  | 0.48  | 8.83E-02 | 0.57 |
| tRF5   | chr1.tRNA104-PseudoGTT-tRF5 | 2.69  | 0.36  | 9.07E-02 | 0.59 |
| tRNA   | chr16.tRNA27-LeuTAG         | 2.12  | 0.43  | 9.14E-02 | 0.59 |
| snoRNA | U57                         | 4.69  | -0.28 | 9.19E-02 | 0.59 |
| piRNA  | piR-35468                   | 4.14  | 0.35  | 9.23E-02 | 0.59 |
| tRF3   | chr16.tRNA31-PseudoTGG-tRF3 | 1.95  | 0.39  | 9.25E-02 | 0.59 |
| mir-5p | hsa-miR-25-5p               | 2.07  | -0.41 | 9.47E-02 | 0.59 |
| mir-3p | hsa-miR-654-3p              | 3.75  | -0.39 | 0.10     | 0.59 |
| snoRNA | snR39B                      | 5.72  | -0.25 | 0.10     | 0.59 |
| snoRNA | U42B                        | 4.22  | -0.44 | 0.10     | 0.59 |
| piRNA  | piR-33404                   | 6.30  | -0.32 | 0.10     | 0.59 |
| rRNA   | LSU-rRNA_Hsa-L51            | 4.19  | -0.39 | 0.10     | 0.59 |
| mir-5p | hsa-miR-432-5p              | 5.13  | -0.31 | 0.10     | 0.59 |
| snRNA  | U6-L9                       | 4.67  | 0.27  | 0.10     | 0.59 |
| mir-3p | hsa-miR-708-3p              | 1.52  | 0.56  | 0.10     | 0.60 |
| mir-3p | hsa-miR-1306-3p             | 2.00  | -0.41 | 0.10     | 0.60 |
| snRNA  | U2-L479                     | 1.54  | 0.45  | 0.10     | 0.60 |
| piRNA  | piR-59299                   | 1.72  | -0.41 | 0.10     | 0.60 |
| mir-3p | hsa-miR-19a-3p              | 4.16  | -0.20 | 0.10     | 0.60 |
| rRNA   | LSU-rRNA_Hsa-L331           | 1.53  | 0.44  | 0.10     | 0.61 |
| mir-3p | hsa-miR-130b-3p             | 2.46  | -0.29 | 0.10     | 0.61 |
| scRNA  | BC200-L13                   | 2.84  | 0.37  | 0.10     | 0.61 |
| rRNA   | 5S-L356                     | 5.32  | 0.21  | 0.10     | 0.61 |
| rRNA   | 5S-L71                      | 1.74  | 0.37  | 0.10     | 0.61 |
| rRNA   | SSU-rRNA_Hsa-L50            | 4.47  | 0.31  | 0.10     | 0.61 |



|            |                          |       |       |      |      |
|------------|--------------------------|-------|-------|------|------|
| snRNA      | U2-L285                  | 2.96  | 0.33  | 0.10 | 0.61 |
| scRNA      | HY1-L397                 | 3.27  | 0.23  | 0.10 | 0.61 |
| mir-5p     | hsa-miR-10b-5p           | 10.26 | 0.19  | 0.10 | 0.61 |
| scRNA      | HY3-L208                 | 1.34  | 0.39  | 0.11 | 0.61 |
| snoRNA     | HBII-180C                | 4.12  | -0.26 | 0.11 | 0.61 |
| rRNA       | LSU-rRNA_Hsa-L189        | 4.24  | 0.23  | 0.11 | 0.61 |
| mir-3p     | hsa-miR-195-3p           | 1.91  | 0.40  | 0.11 | 0.61 |
| mir-5p3pno | hsa-miR-598              | 1.77  | -0.48 | 0.11 | 0.61 |
| snoRNA     | HBII-99                  | 4.91  | -0.30 | 0.11 | 0.61 |
| rRNA       | 5S-L109                  | 9.56  | 0.16  | 0.11 | 0.61 |
| snoRNA     | U3-4                     | 7.31  | -0.26 | 0.11 | 0.61 |
| rRNA       | 5S-L194                  | 2.89  | 0.23  | 0.11 | 0.61 |
| mir-5p     | hsa-miR-493-5p           | 4.61  | -0.31 | 0.11 | 0.61 |
| snoRNA     | HBI-100                  | 4.44  | -0.21 | 0.11 | 0.61 |
| mir-5p     | hsa-miR-4732-5p          | 3.27  | 0.30  | 0.11 | 0.61 |
| mir-5p3pno | hsa-miR-451a             | 12.70 | -0.23 | 0.11 | 0.61 |
| rRNA       | LSU-rRNA_Hsa-L102        | 3.17  | 0.33  | 0.11 | 0.61 |
| piRNA      | piR-37525                | 1.54  | -0.55 | 0.11 | 0.61 |
| rRNA       | LSU-rRNA_Hsa-L387        | 9.35  | 0.15  | 0.11 | 0.61 |
| tRNA       | chr6.tRNA73-ArgCCG       | 2.37  | 0.37  | 0.11 | 0.61 |
| piRNA      | piR-31115-L4             | 7.28  | 0.19  | 0.11 | 0.61 |
| rRNA       | 5S-L790                  | 4.09  | 0.24  | 0.11 | 0.61 |
| tRNA       | chr12.tRNA10-AspGTC      | 4.59  | 0.28  | 0.11 | 0.61 |
| snoRNA     | ACA44                    | 2.30  | -0.40 | 0.11 | 0.61 |
| tRF5       | chr17.tRNA31-AsnGTT-tRF5 | 2.92  | 0.35  | 0.11 | 0.61 |
| mir-3p     | hsa-miR-3529-3p          | 7.65  | -0.15 | 0.11 | 0.61 |
| scRNA      | HY5                      | 1.57  | 0.34  | 0.12 | 0.61 |
| mir-5p     | hsa-miR-483-5p           | 4.02  | 0.30  | 0.12 | 0.61 |
| scRNA      | HY4-L110                 | 1.99  | -0.46 | 0.12 | 0.61 |
| tRNA       | chr16.tRNA13-PseudoCTT   | 4.70  | 0.29  | 0.12 | 0.62 |
| piRNA      | piR-36494                | 2.00  | -0.58 | 0.12 | 0.62 |
| snoRNA     | U104                     | 7.46  | -0.27 | 0.12 | 0.62 |
| scRNA      | HY1-L260                 | 4.88  | 0.19  | 0.12 | 0.62 |
| rRNA       | LSU-rRNA_Hsa-L165        | 7.53  | -0.24 | 0.12 | 0.63 |
| snoRNA     | U25                      | 5.20  | -0.36 | 0.12 | 0.63 |
| mir-3p     | hsa-miR-148b-3p          | 8.62  | -0.16 | 0.12 | 0.63 |
| snoRNA     | mgh28S-2411              | 6.56  | -0.27 | 0.12 | 0.63 |
| rRNA       | SSU-rRNA_Hsa-L74         | 6.51  | 0.22  | 0.12 | 0.63 |
| scRNA      | BC200-L116               | 2.42  | 0.46  | 0.12 | 0.63 |
| mir-5p     | hsa-miR-151a-5p          | 6.40  | -0.21 | 0.12 | 0.63 |
| snRNA      | U1-L17                   | 1.83  | -0.66 | 0.13 | 0.64 |
| rRNA       | LSU-rRNA_Hsa-L298        | 3.46  | 0.31  | 0.13 | 0.64 |
| mir-5p3pno | hsa-miR-206              | 2.36  | 0.58  | 0.13 | 0.64 |

|            |                        |       |       |      |      |
|------------|------------------------|-------|-------|------|------|
| scRNA      | BC200-L49              | 4.36  | 0.23  | 0.13 | 0.64 |
| snoRNA     | U16                    | 2.75  | -0.32 | 0.13 | 0.64 |
| tRF3       | chr3.tRNA6-CysGCA-trF3 | 2.19  | 0.42  | 0.13 | 0.64 |
| piRNA      | piR-35548-L3           | 2.78  | -0.35 | 0.13 | 0.64 |
| mir-5p     | hsa-miR-98-5p          | 6.17  | -0.18 | 0.13 | 0.64 |
| tRNA       | chr16.tRNA18-GlyGCC    | 1.78  | -0.33 | 0.13 | 0.64 |
| scRNA      | HY4-L68                | 4.03  | 0.17  | 0.13 | 0.64 |
| mir-5p3pno | hsa-miR-210            | 2.15  | -0.37 | 0.13 | 0.64 |
| mir-5p     | hsa-miR-374a-5p        | 2.91  | -0.27 | 0.13 | 0.64 |
| tRNA       | chr1.tRNA38-LeuCAG     | 3.68  | 0.31  | 0.13 | 0.64 |
| tRNA       | chr1.tRNA72-AspGTC     | 7.23  | 0.22  | 0.13 | 0.64 |
| snoRNA     | U92                    | 2.16  | -0.28 | 0.13 | 0.65 |
| rRNA       | SSU-rRNA_Hsa-L30       | 11.12 | 0.12  | 0.13 | 0.65 |
| mir-3p     | hsa-miR-381-3p         | 4.43  | -0.30 | 0.14 | 0.65 |
| snRNA      | U3-L4                  | 1.56  | 0.40  | 0.14 | 0.65 |
| snoRNA     | SNORD125               | 1.69  | -0.46 | 0.14 | 0.65 |
| rRNA       | LSU-rRNA_Hsa-L93       | 7.67  | 0.17  | 0.14 | 0.65 |
| rRNA       | LSU-rRNA_Hsa-L375      | 10.09 | -0.23 | 0.14 | 0.65 |
| tRNA       | chr6.tRNA83-LeuTAA     | 2.22  | 0.29  | 0.14 | 0.66 |
| snRNA      | U2-L128                | 7.39  | 0.21  | 0.14 | 0.67 |
| snoRNA     | HBII-420               | 4.25  | -0.30 | 0.14 | 0.67 |
| snoRNA     | U82                    | 5.05  | -0.27 | 0.14 | 0.67 |
| snRNA      | U14-L3                 | 1.49  | -0.45 | 0.15 | 0.68 |
| scRNA      | HY5-L11                | 5.18  | 0.21  | 0.15 | 0.68 |
| rRNA       | LSU-rRNA_Hsa-L366      | 4.93  | -0.29 | 0.15 | 0.68 |
| mir-3p     | hsa-miR-323a-3p        | 3.26  | -0.35 | 0.15 | 0.68 |
| snoRNA     | snR38B                 | 3.26  | -0.35 | 0.15 | 0.68 |
| scRNA      | HY1-L25                | 1.88  | 0.33  | 0.15 | 0.68 |
| mir-3p     | hsa-miR-505-3p         | 2.00  | -0.34 | 0.15 | 0.69 |
| mir-3p     | hsa-miR-140-3p         | 9.02  | -0.14 | 0.15 | 0.69 |
| scRNA      | BC200-L122             | 3.31  | 0.23  | 0.15 | 0.69 |
| scRNA      | HY4-L134               | 2.51  | -0.34 | 0.15 | 0.70 |
| rRNA       | LSU-rRNA_Hsa-L304      | 2.50  | -0.28 | 0.15 | 0.70 |
| snoRNA     | U49A                   | 7.52  | -0.23 | 0.15 | 0.70 |
| scRNA      | BC200-L167             | 1.58  | 0.34  | 0.16 | 0.70 |
| mir-3p     | hsa-miR-132-3p         | 1.92  | -0.34 | 0.16 | 0.70 |
| mir-5p     | hsa-miR-30d-5p         | 10.84 | -0.13 | 0.16 | 0.71 |
| mir-3p     | hsa-miR-411-3p         | 1.75  | -0.48 | 0.16 | 0.71 |
| rRNA       | LSU-rRNA_Hsa-L275      | 5.54  | 0.20  | 0.16 | 0.71 |
| tRNA       | chr5.tRNA22-AspGTC     | 1.97  | 0.42  | 0.16 | 0.71 |
| snoRNA     | U90                    | 2.75  | 0.34  | 0.16 | 0.71 |
| scRNA      | HY3-L287               | 1.40  | -0.34 | 0.16 | 0.71 |
| mir-5p3pno | hsa-miR-3928           | 1.51  | -0.42 | 0.16 | 0.71 |

|            |                     |       |       |      |      |
|------------|---------------------|-------|-------|------|------|
| mir-3p     | hsa-miR-3158-3p     | 3.71  | -0.26 | 0.16 | 0.71 |
| snoRNA     | U91                 | 2.25  | -0.49 | 0.16 | 0.71 |
| mir-3p     | hsa-miR-382-3p      | 2.29  | -0.30 | 0.17 | 0.71 |
| rRNA       | 5S-L106             | 12.29 | 0.14  | 0.17 | 0.71 |
| mir-3p     | hsa-miR-127-3p      | 5.07  | -0.27 | 0.17 | 0.71 |
| scRNA      | HY4-L92             | 1.42  | 0.33  | 0.17 | 0.71 |
| tRNA       | chr12.tRNA11-PheGAA | 1.77  | 0.45  | 0.17 | 0.71 |
| mir-3p     | hsa-miR-199b-3p     | 7.58  | -0.16 | 0.17 | 0.71 |
| rRNA       | 5S-L990             | 3.08  | 0.19  | 0.17 | 0.71 |
| tRNA       | chr2.tRNA6-GluTTC   | 4.09  | -0.17 | 0.17 | 0.71 |
| mir-3p     | hsa-miR-125a-3p     | 3.83  | 0.27  | 0.17 | 0.71 |
| mir-5p     | hsa-miR-1234-5p     | 14.77 | 0.19  | 0.17 | 0.71 |
| piRNA      | piR-57516           | 5.25  | 0.19  | 0.17 | 0.71 |
| scRNA      | BC200-L96           | 5.30  | 0.19  | 0.17 | 0.71 |
| scRNA      | HY1-L279            | 4.02  | 0.18  | 0.17 | 0.71 |
| snRNA      | U1-L43              | 1.94  | 0.26  | 0.17 | 0.71 |
| mir-3p     | hsa-miR-3184-3p     | 11.60 | 0.12  | 0.17 | 0.71 |
| mir-5p     | hsa-miR-345-5p      | 2.70  | -0.29 | 0.17 | 0.71 |
| tRNA       | chr11.tRNA13-PheGAA | 3.60  | 0.31  | 0.17 | 0.71 |
| mir-3p     | hsa-miR-30a-3p      | 5.31  | 0.15  | 0.17 | 0.72 |
| mir-5p     | hsa-miR-340-5p      | 6.42  | -0.18 | 0.17 | 0.72 |
| scRNA      | HY1-L342            | 1.37  | 0.41  | 0.18 | 0.72 |
| rRNA       | LSU-rRNA_Hsa-L198   | 7.74  | 0.14  | 0.18 | 0.72 |
| rRNA       | 5S-L829             | 2.65  | 0.27  | 0.18 | 0.72 |
| rRNA       | LSU-rRNA_Hsa-L247   | 1.53  | 0.30  | 0.18 | 0.72 |
| mir-5p     | hsa-miR-93-5p       | 7.11  | -0.15 | 0.18 | 0.72 |
| snRNA      | U2-L481             | 1.44  | 0.50  | 0.18 | 0.72 |
| snRNA      | U17-L2              | 2.12  | -0.34 | 0.18 | 0.72 |
| snRNA      | U1-L33              | 2.56  | 0.26  | 0.18 | 0.72 |
| snoRNA     | ACA53               | 3.01  | -0.37 | 0.18 | 0.72 |
| snoRNA     | U36A                | 1.72  | -0.44 | 0.18 | 0.72 |
| mir-3p     | hsa-miR-148a-3p     | 13.46 | -0.14 | 0.18 | 0.72 |
| mir-5p3pno | hsa-miR-410         | 1.74  | -0.39 | 0.18 | 0.72 |
| scRNA      | HY5-L8              | 3.89  | 0.22  | 0.18 | 0.72 |
| mir-5p     | hsa-miR-330-5p      | 1.63  | 0.31  | 0.18 | 0.72 |
| snoRNA     | HBII-85-15          | 1.65  | -0.58 | 0.18 | 0.72 |
| rRNA       | LSU-rRNA_Hsa-L345   | 2.84  | 0.30  | 0.18 | 0.72 |
| scRNA      | HY3-L159            | 3.19  | 0.31  | 0.18 | 0.72 |
| scRNA      | HY1-L227            | 1.30  | 0.36  | 0.18 | 0.72 |
| scRNA      | BC200-L146          | 2.61  | -0.30 | 0.18 | 0.72 |
| mir-3p     | hsa-miR-1185-1-3p   | 2.25  | -0.38 | 0.18 | 0.72 |
| piRNA      | piR-31986           | 8.37  | -0.23 | 0.19 | 0.72 |
| snoRNA     | U61                 | 5.55  | -0.23 | 0.19 | 0.73 |

|            |                             |       |       |      |      |
|------------|-----------------------------|-------|-------|------|------|
| mir-5p     | hsa-miR-1304-5p             | 1.47  | -0.38 | 0.19 | 0.73 |
| scRNA      | BC200-L165                  | 1.54  | 0.35  | 0.19 | 0.73 |
| scRNA      | BC200-L90                   | 2.60  | 0.26  | 0.19 | 0.73 |
| scRNA      | HY1-L124                    | 1.84  | 0.29  | 0.19 | 0.73 |
| piRNA      | piR-61646-L2                | 8.65  | -0.19 | 0.19 | 0.73 |
| mir-5p3pno | hsa-miR-378f                | 1.69  | 0.24  | 0.19 | 0.73 |
| mir-5p     | hsa-miR-1292-5p             | 1.70  | -0.32 | 0.19 | 0.73 |
| rRNA       | 5S-L530                     | 5.17  | 0.33  | 0.19 | 0.73 |
| snoRNA     | U18B                        | 2.75  | -0.30 | 0.19 | 0.73 |
| mir-5p     | hsa-let-7i-5p               | 12.19 | -0.11 | 0.19 | 0.73 |
| rRNA       | 5S-L558                     | 7.28  | 0.15  | 0.19 | 0.73 |
| mir-5p     | hsa-miR-185-5p              | 8.24  | -0.18 | 0.20 | 0.73 |
| tRNA       | chr6.tRNA98-LeuAAG          | 2.93  | 0.35  | 0.20 | 0.73 |
| snoRNA     | HBI-115                     | 2.00  | -0.37 | 0.20 | 0.73 |
| mir-5p3pno | hsa-miR-4461                | 2.06  | -0.46 | 0.20 | 0.73 |
| mir-5p     | hsa-miR-744-5p              | 6.54  | -0.15 | 0.20 | 0.73 |
| snoRNA     | U84                         | 2.10  | -0.37 | 0.20 | 0.73 |
| rRNA       | 5S-L1075                    | 3.11  | 0.23  | 0.20 | 0.73 |
| mir-5p     | hsa-miR-3613-5p             | 4.64  | -0.19 | 0.20 | 0.73 |
| snoRNA     | U27                         | 4.90  | -0.27 | 0.20 | 0.73 |
| tRNA       | chr7.tRNA3-ArgCCT           | 5.38  | 0.14  | 0.20 | 0.73 |
| snRNA      | U6-L503                     | 1.31  | 0.36  | 0.20 | 0.73 |
| tRF3       | chr17.tRNA33-PseudoTTG-tRF3 | 4.41  | -0.23 | 0.20 | 0.73 |
| snRNA      | U1-L47                      | 1.98  | 0.27  | 0.20 | 0.73 |
| mir-3p     | hsa-let-7i-3p               | 1.50  | -0.33 | 0.20 | 0.73 |
| snRNA      | U1-L29                      | 2.03  | 0.27  | 0.20 | 0.73 |
| rRNA       | 5S-L126                     | 2.55  | 0.21  | 0.20 | 0.73 |
| mir-5p     | hsa-let-7g-5p               | 11.06 | -0.13 | 0.20 | 0.73 |
| rRNA       | LSU-rRNA_Hsa-L384           | 14.09 | 0.11  | 0.20 | 0.73 |
| scRNA      | BC200-L117                  | 1.83  | 0.38  | 0.20 | 0.73 |
| scRNA      | HY3-L478                    | 8.12  | -0.15 | 0.20 | 0.73 |
| rRNA       | 5S-L612                     | 2.86  | 0.26  | 0.21 | 0.73 |
| mir-5p     | hsa-miR-584-5p              | 7.31  | -0.16 | 0.21 | 0.73 |
| rRNA       | LSU-rRNA_Hsa-L66            | 1.86  | -0.33 | 0.21 | 0.73 |
| snRNA      | U2-L161                     | 12.39 | 0.22  | 0.21 | 0.73 |
| piRNA      | piR-30112                   | 2.68  | -0.30 | 0.21 | 0.73 |
| rRNA       | 5S-L627                     | 1.59  | 0.33  | 0.21 | 0.73 |
| scRNA      | HY4-L103                    | 4.44  | -0.21 | 0.21 | 0.73 |
| mir-5p     | hsa-miR-382-5p              | 5.88  | -0.20 | 0.21 | 0.73 |
| tRNA       | chr17.tRNA2-LysTTT          | 3.04  | 0.28  | 0.21 | 0.73 |
| scRNA      | HY4-L49                     | 1.27  | 0.36  | 0.21 | 0.73 |
| scRNA      | HY4-L50                     | 1.52  | -0.32 | 0.21 | 0.73 |
| tRNA       | chr14.tRNA2-LeuTAG          | 2.26  | 0.35  | 0.21 | 0.73 |

|        |                            |       |       |      |      |
|--------|----------------------------|-------|-------|------|------|
| snRNA  | U1-L4                      | 8.27  | 0.18  | 0.21 | 0.73 |
| piRNA  | piR-36444                  | 2.53  | -0.31 | 0.21 | 0.73 |
| scRNA  | BC200-L129                 | 2.19  | 0.32  | 0.21 | 0.73 |
| rRNA   | LSU-rRNA_Hsa-L143          | 5.07  | 0.14  | 0.21 | 0.73 |
| mir-3p | hsa-miR-136-3p             | 2.62  | -0.29 | 0.21 | 0.73 |
| mir-5p | hsa-miR-20a-5p             | 7.17  | -0.17 | 0.21 | 0.73 |
| tRNA   | chr6.tRNA131-GlnCTG        | 1.62  | 0.32  | 0.21 | 0.73 |
| scRNA  | HY3-L34                    | 3.61  | -0.30 | 0.21 | 0.73 |
| mir-3p | hsa-miR-130a-3p            | 3.58  | -0.21 | 0.21 | 0.74 |
| rRNA   | 5S-L101                    | 9.06  | 0.12  | 0.22 | 0.74 |
| snoRNA | HBII-289                   | 7.18  | -0.16 | 0.22 | 0.74 |
| mir-3p | hsa-miR-10a-3p             | 1.82  | 0.30  | 0.22 | 0.74 |
| rRNA   | 5S-L137                    | 1.95  | 0.24  | 0.22 | 0.74 |
| mir-3p | hsa-miR-3150b-3p           | 1.47  | 0.34  | 0.22 | 0.74 |
| rRNA   | LSU-rRNA_Hsa-L58           | 7.02  | 0.15  | 0.22 | 0.74 |
| snRNA  | U1-L7                      | 6.15  | -0.14 | 0.22 | 0.74 |
| snoRNA | HBII-210                   | 5.47  | -0.22 | 0.22 | 0.74 |
| piRNA  | piR-33151-L4               | 4.06  | 0.19  | 0.22 | 0.74 |
| scRNA  | BC200-L82                  | 1.75  | 0.30  | 0.22 | 0.74 |
| mir-5p | hsa-miR-30e-5p             | 8.13  | -0.13 | 0.22 | 0.74 |
| scRNA  | HY1-L295                   | 4.37  | 0.16  | 0.22 | 0.74 |
| tRF3   | chr17.tRNA1-Pseudo???-tRF3 | 2.09  | -0.27 | 0.22 | 0.74 |
| tRNA   | chr17.tRNA23-ArgCCG        | 3.40  | 0.18  | 0.22 | 0.74 |
| rRNA   | 5S-L254                    | 2.29  | 0.24  | 0.23 | 0.74 |
| rRNA   | 5S-L1196                   | 2.22  | -0.37 | 0.23 | 0.74 |
| rRNA   | 5S-L1067                   | 2.57  | 0.19  | 0.23 | 0.74 |
| tRNA   | chr5.tRNA14-ProTGG         | 4.85  | -0.17 | 0.23 | 0.74 |
| scRNA  | HY4-L89                    | 8.76  | -0.16 | 0.23 | 0.74 |
| rRNA   | 5S-L1091                   | 1.37  | 0.28  | 0.23 | 0.74 |
| mir-5p | hsa-miR-21-5p              | 13.59 | -0.11 | 0.23 | 0.74 |
| scRNA  | BC200-L31                  | 1.42  | 0.35  | 0.23 | 0.74 |
| mir-3p | hsa-miR-143-3p             | 9.70  | -0.14 | 0.23 | 0.74 |
| rRNA   | 5S-L471                    | 2.19  | 0.24  | 0.23 | 0.74 |
| rRNA   | 5S-L1143                   | 1.64  | 0.33  | 0.23 | 0.74 |
| rRNA   | 5S-L930                    | 1.75  | 0.29  | 0.23 | 0.74 |
| mir-5p | hsa-miR-126-5p             | 6.05  | -0.16 | 0.23 | 0.74 |
| piRNA  | piR-31987                  | 6.33  | -0.20 | 0.23 | 0.74 |
| tRNA   | chr2.tRNA17-PseudoTTC      | 7.07  | -0.16 | 0.23 | 0.74 |
| piRNA  | piR-36741                  | 6.41  | -0.18 | 0.23 | 0.74 |
| scRNA  | HY4-L36                    | 2.19  | -0.27 | 0.23 | 0.74 |
| scRNA  | HY1-L439                   | 2.44  | 0.19  | 0.23 | 0.75 |
| piRNA  | piR-34041                  | 4.17  | -0.25 | 0.24 | 0.75 |
| rRNA   | LSU-rRNA_Hsa-L389          | 10.71 | 0.17  | 0.24 | 0.75 |

|            |                        |       |       |      |      |
|------------|------------------------|-------|-------|------|------|
| mir-5p3pno | hsa-miR-548j           | 1.80  | -0.34 | 0.24 | 0.75 |
| rRNA       | 5S-L108                | 11.53 | 0.11  | 0.24 | 0.75 |
| scRNA      | HY1-L3                 | 3.10  | 0.17  | 0.24 | 0.75 |
| scRNA      | HY3-L84                | 6.39  | -0.15 | 0.24 | 0.75 |
| mir-5p     | hsa-miR-766-5p         | 1.81  | -0.27 | 0.24 | 0.75 |
| rRNA       | LSU-rRNA_Hsa-L208      | 7.16  | 0.12  | 0.24 | 0.75 |
| snRNA      | U6-L1561               | 2.12  | 0.42  | 0.24 | 0.75 |
| mir-5p     | hsa-miR-92b-5p         | 2.27  | 0.23  | 0.24 | 0.75 |
| mir-3p     | hsa-miR-548g-3p        | 2.15  | 0.28  | 0.24 | 0.75 |
| tRNA       | chr13.tRNA4-GluCTC     | 2.04  | -0.21 | 0.24 | 0.75 |
| scRNA      | BC200-L93              | 1.59  | 0.39  | 0.24 | 0.75 |
| snoRNA     | HBII-336               | 2.07  | -0.29 | 0.24 | 0.75 |
| scRNA      | BC200-L114             | 2.21  | 0.23  | 0.24 | 0.75 |
| tRF5       | chr9.tRNA6-AspGTC-tRF5 | 2.90  | 0.19  | 0.24 | 0.75 |
| mir-5p     | hsa-miR-454-5p         | 2.36  | -0.21 | 0.24 | 0.75 |
| scRNA      | HY1-L171               | 1.68  | -0.22 | 0.24 | 0.75 |
| mir-5p3pno | hsa-miR-421            | 2.78  | -0.19 | 0.25 | 0.75 |
| mir-5p3pno | hsa-miR-3672           | 1.53  | -0.30 | 0.25 | 0.75 |
| tRNA       | chr16.tRNA4-ProAGG     | 2.50  | -0.23 | 0.25 | 0.75 |
| mir-5p     | hsa-let-7f-5p-L2       | 6.10  | -0.12 | 0.25 | 0.75 |
| scRNA      | HY1-L45                | 1.90  | -0.30 | 0.25 | 0.75 |
| piRNA      | piR-31068-L3           | 3.12  | -0.24 | 0.25 | 0.75 |
| rRNA       | 5S-L97                 | 10.24 | 0.13  | 0.25 | 0.75 |
| rRNA       | 5S-L317                | 1.26  | 0.31  | 0.25 | 0.75 |
| snoRNA     | mgU2-19/30             | 3.71  | 0.15  | 0.25 | 0.76 |
| rRNA       | 5S-L676                | 1.34  | 0.30  | 0.25 | 0.76 |
| piRNA      | piR-32950              | 6.31  | 0.13  | 0.25 | 0.76 |
| snRNA      | U1-L11                 | 3.91  | -0.25 | 0.25 | 0.76 |
| tRNA       | chr6.tRNA40-ValTAC     | 2.73  | -0.21 | 0.25 | 0.76 |
| snRNA      | U3-L205                | 4.79  | -0.15 | 0.25 | 0.76 |
| scRNA      | BC200-L155             | 2.70  | 0.24  | 0.25 | 0.76 |
| scRNA      | HY1-L239               | 4.37  | 0.15  | 0.26 | 0.76 |
| scRNA      | HY4-L96                | 3.68  | 0.15  | 0.26 | 0.77 |
| snoRNA     | ACA45                  | 6.69  | -0.11 | 0.26 | 0.77 |
| tRNA       | chr6.tRNA74-LeuCAA     | 2.43  | 0.23  | 0.26 | 0.77 |
| piRNA      | piR-33382              | 8.69  | -0.16 | 0.26 | 0.78 |
| rRNA       | 5S-L995                | 3.46  | -0.45 | 0.26 | 0.78 |
| rRNA       | 5S-L815                | 2.57  | 0.19  | 0.27 | 0.79 |
| scRNA      | HY1-L184               | 3.77  | 0.14  | 0.27 | 0.79 |
| rRNA       | LSU-rRNA_Hsa-L409      | 4.71  | 0.15  | 0.27 | 0.79 |
| rRNA       | 5S-L819                | 2.01  | 0.27  | 0.27 | 0.79 |
| mir-3p     | hsa-miR-28-3p          | 7.13  | -0.11 | 0.27 | 0.79 |
| scRNA      | BC200-L20              | 1.94  | -0.31 | 0.27 | 0.79 |

|            |                           |       |       |      |      |
|------------|---------------------------|-------|-------|------|------|
| mir-3p     | hsa-miR-185-3p            | 2.98  | -0.21 | 0.27 | 0.79 |
| mir-5p     | hsa-miR-589-5p            | 4.55  | 0.14  | 0.27 | 0.79 |
| rRNA       | 5S-L95                    | 1.71  | 0.23  | 0.27 | 0.79 |
| piRNA      | piR-31447                 | 1.47  | -0.35 | 0.28 | 0.79 |
| mir-5p3pno | hsa-miR-3909              | 1.71  | -0.28 | 0.28 | 0.79 |
| rRNA       | SSU-rRNA_Hsa-L16          | 6.78  | 0.17  | 0.28 | 0.79 |
| mir-3p     | hsa-let-7a-3p-L2          | 3.03  | -0.20 | 0.28 | 0.79 |
| rRNA       | 5S-L877                   | 2.33  | 0.19  | 0.28 | 0.79 |
| tRF5       | chr3.tRNA9-PseudoTTG-tRF5 | 1.99  | 0.35  | 0.28 | 0.79 |
| mir-5p     | hsa-miR-146b-5p           | 7.71  | -0.12 | 0.28 | 0.79 |
| tRNA       | chr6.tRNA128-GlyGCC       | 4.35  | 0.13  | 0.28 | 0.79 |
| mir-5p3pno | hsa-miR-3138              | 1.71  | 0.34  | 0.28 | 0.79 |
| tRF5       | chr6.tRNA130-GlnTTG-tRF5  | 1.89  | 0.24  | 0.28 | 0.79 |
| scRNA      | HY1-L100                  | 8.91  | 0.12  | 0.28 | 0.79 |
| snoRNA     | snR38C                    | 2.03  | -0.33 | 0.28 | 0.79 |
| rRNA       | LSU-rRNA_Hsa-L163         | 9.10  | -0.17 | 0.28 | 0.79 |
| rRNA       | 5S-L233                   | 2.20  | 0.22  | 0.28 | 0.79 |
| rRNA       | 5S-L113                   | 10.34 | 0.11  | 0.28 | 0.79 |
| snoRNA     | ACA54                     | 1.60  | -0.26 | 0.28 | 0.79 |
| tRNA       | chr17.tRNA36-ThrAGT       | 2.02  | 0.23  | 0.28 | 0.79 |
| mir-5p     | hsa-miR-23a-5p            | 1.78  | 0.21  | 0.28 | 0.79 |
| snoRNA     | U76                       | 2.36  | -0.29 | 0.29 | 0.79 |
| mir-5p     | hsa-miR-194-5p            | 4.47  | -0.15 | 0.29 | 0.79 |
| scRNA      | HY1-L137                  | 4.44  | 0.15  | 0.29 | 0.79 |
| tRNA       | chr6.tRNA100-LeuCAA       | 3.49  | 0.18  | 0.29 | 0.79 |
| snoRNA     | HBII-55                   | 4.50  | -0.25 | 0.29 | 0.79 |
| tRNA       | chr6.tRNA129-MetCAT       | 5.33  | 0.17  | 0.29 | 0.79 |
| mir-3p     | hsa-miR-548o-3p-L2        | 3.13  | -0.19 | 0.29 | 0.79 |
| mir-3p     | hsa-miR-200a-3p           | 2.22  | -0.25 | 0.29 | 0.79 |
| rRNA       | LSU-rRNA_Hsa-L13          | 12.04 | 0.10  | 0.29 | 0.80 |
| piRNA      | piR-43771-L6              | 2.90  | 0.23  | 0.29 | 0.80 |
| mir-3p     | hsa-miR-181a-3p           | 2.62  | 0.23  | 0.29 | 0.80 |
| tRNA       | chr14.tRNA10-IleAAT       | 1.41  | -0.30 | 0.29 | 0.80 |
| snRNA      | U6-L440                   | 1.97  | -0.31 | 0.29 | 0.80 |
| snRNA      | U1-L63                    | 2.53  | 0.20  | 0.30 | 0.80 |
| scRNA      | HY1-L374                  | 8.15  | 0.13  | 0.30 | 0.81 |
| scRNA      | HY1-L223                  | 6.19  | 0.11  | 0.30 | 0.81 |
| scRNA      | HY4-L77                   | 2.15  | 0.19  | 0.30 | 0.81 |
| rRNA       | LSU-rRNA_Hsa-L60          | 12.44 | 0.12  | 0.30 | 0.81 |
| scRNA      | HY1-L114                  | 3.94  | 0.15  | 0.30 | 0.81 |
| rRNA       | 5S-L104                   | 10.61 | 0.11  | 0.30 | 0.81 |
| rRNA       | 5S-L946                   | 9.07  | 0.09  | 0.30 | 0.81 |
| mir-5p     | hsa-miR-629-5p            | 7.76  | 0.10  | 0.30 | 0.81 |

|            |                            |       |       |      |      |
|------------|----------------------------|-------|-------|------|------|
| mir-3p     | hsa-miR-21-3p              | 1.95  | 0.26  | 0.30 | 0.81 |
| snoRNA     | U87                        | 1.65  | -0.35 | 0.30 | 0.81 |
| tRF3       | chr18.tRNA1-GluCTC-tRF3    | 2.27  | 0.31  | 0.30 | 0.81 |
| piRNA      | piR-58356                  | 5.40  | -0.16 | 0.30 | 0.81 |
| scRNA      | BC200-L4                   | 3.40  | 0.17  | 0.30 | 0.81 |
| tRF5       | chr20.tRNA7-PseudoCTC-tRF5 | 1.39  | 0.27  | 0.31 | 0.81 |
| scRNA      | HY3-L203                   | 1.78  | -0.23 | 0.31 | 0.81 |
| snoRNA     | U46                        | 4.48  | -0.21 | 0.31 | 0.81 |
| rRNA       | SSU-rRNA_Hsa-L80           | 6.73  | 0.15  | 0.31 | 0.81 |
| scRNA      | HY4-L112                   | 3.97  | -0.12 | 0.31 | 0.81 |
| scRNA      | BC200-L10                  | 2.65  | 0.19  | 0.31 | 0.81 |
| tRF3       | chr2.tRNA21-SerTGA-tRF3    | 2.33  | -0.25 | 0.31 | 0.81 |
| mir-5p3pno | hsa-miR-548e               | 2.60  | -0.19 | 0.31 | 0.81 |
| piRNA      | piR-33151-L9               | 3.44  | 0.16  | 0.31 | 0.81 |
| tRNA       | chr2.tRNA22-PseudoTTG      | 3.03  | -0.19 | 0.31 | 0.81 |
| tRF5       | chr17.tRNA26-CysGCA-tRF5   | 5.39  | -0.14 | 0.31 | 0.81 |
| rRNA       | LSU-rRNA_Hsa-L365          | 1.60  | 0.28  | 0.31 | 0.81 |
| mir-3p     | hsa-miR-17-3p              | 1.53  | -0.26 | 0.31 | 0.81 |
| tRF3       | chr10.tRNA5-PseudoCTG-tRF3 | 1.70  | -0.26 | 0.31 | 0.81 |
| mir-3p     | hsa-miR-2115-3p            | 1.61  | 0.28  | 0.31 | 0.81 |
| snoRNA     | ACA7                       | 2.30  | -0.30 | 0.31 | 0.81 |
| mir-5p     | hsa-let-7a-5p              | 2.02  | -0.32 | 0.31 | 0.81 |
| piRNA      | piR-33151-L8               | 4.43  | 0.13  | 0.32 | 0.81 |
| snRNA      | U7-L207                    | 2.19  | 0.44  | 0.32 | 0.81 |
| rRNA       | 5S-L255                    | 2.65  | 0.16  | 0.32 | 0.81 |
| rRNA       | 5S-L363                    | 1.50  | 0.24  | 0.32 | 0.81 |
| mir-5p3pno | hsa-miR-378d-L2            | 1.37  | 0.21  | 0.32 | 0.81 |
| mir-3p     | hsa-miR-3187-3p            | 1.63  | -0.30 | 0.32 | 0.81 |
| snoRNA     | U38A                       | 4.23  | -0.22 | 0.32 | 0.81 |
| snoRNA     | U26                        | 8.56  | -0.16 | 0.32 | 0.81 |
| piRNA      | piR-50811                  | 3.43  | 0.16  | 0.32 | 0.81 |
| scRNA      | HY4-L37                    | 4.01  | -0.14 | 0.32 | 0.81 |
| mir-3p     | hsa-miR-409-3p             | 5.71  | -0.19 | 0.32 | 0.81 |
| piRNA      | piR-33468-L4               | 2.34  | 0.16  | 0.32 | 0.81 |
| tRNA       | chr15.tRNA4-ArgTCG         | 2.60  | 0.27  | 0.32 | 0.81 |
| rRNA       | 5S-L78                     | 2.70  | 0.17  | 0.32 | 0.81 |
| snRNA      | U5-L22                     | 1.98  | 0.34  | 0.32 | 0.81 |
| scRNA      | HY1-L389                   | 2.66  | 0.18  | 0.32 | 0.81 |
| mir-5p     | hsa-miR-769-5p             | 3.02  | -0.21 | 0.32 | 0.81 |
| rRNA       | 5S-L804                    | 4.97  | 0.11  | 0.32 | 0.81 |
| mir-3p     | hsa-miR-151a-3p            | 11.62 | -0.11 | 0.32 | 0.81 |
| tRF5       | chr6.tRNA109-PheGAA-tRF5   | 2.26  | 0.24  | 0.32 | 0.81 |
| mir-5p     | hsa-miR-20b-5p             | 3.49  | -0.19 | 0.32 | 0.81 |



|            |                         |       |       |      |      |
|------------|-------------------------|-------|-------|------|------|
| mir-5p3pno | hsa-miR-152             | 5.59  | -0.14 | 0.33 | 0.81 |
| tRNA       | chr1.tRNA33-Pseudo???   | 3.32  | -0.18 | 0.33 | 0.81 |
| snoRNA     | U96a                    | 3.47  | -0.22 | 0.33 | 0.81 |
| scRNA      | HY1-L419                | 3.95  | 0.13  | 0.33 | 0.81 |
| scRNA      | BC200-L164              | 2.31  | 0.23  | 0.33 | 0.81 |
| snoRNA     | HBII-234                | 2.39  | -0.25 | 0.33 | 0.81 |
| scRNA      | HY1-L418                | 1.64  | -0.23 | 0.33 | 0.81 |
| piRNA      | piR-31638               | 1.74  | -0.30 | 0.33 | 0.81 |
| tRNA       | chr14.tRNA3-ProTGG      | 3.97  | 0.16  | 0.33 | 0.81 |
| rRNA       | 5S-L1014                | 1.63  | 0.29  | 0.33 | 0.81 |
| mir-5p     | hsa-miR-2115-5p         | 1.27  | 0.28  | 0.33 | 0.81 |
| mir-5p     | hsa-miR-4787-5p         | 1.33  | 0.33  | 0.33 | 0.81 |
| snRNA      | U2-L782                 | 2.99  | 0.21  | 0.33 | 0.81 |
| scRNA      | HY1-L191                | 3.51  | 0.13  | 0.33 | 0.81 |
| rRNA       | 5S-L573                 | 3.03  | 0.17  | 0.33 | 0.81 |
| mir-5p3pno | hsa-miR-618             | 2.72  | 0.21  | 0.33 | 0.81 |
| mir-3p     | hsa-miR-374a-3p         | 3.85  | 0.12  | 0.33 | 0.81 |
| mir-3p     | hsa-miR-342-3p          | 3.63  | -0.18 | 0.34 | 0.81 |
| tRNA       | chr6.tRNA30-ProCGG      | 10.88 | -0.11 | 0.34 | 0.81 |
| mir-5p3pno | hsa-miR-1294            | 1.62  | 0.28  | 0.34 | 0.81 |
| mir-3p     | hsa-miR-1307-3p         | 7.96  | -0.11 | 0.34 | 0.81 |
| mir-5p     | hsa-miR-140-5p          | 4.20  | -0.16 | 0.34 | 0.81 |
| scRNA      | HY1-L247                | 1.49  | 0.23  | 0.34 | 0.81 |
| rRNA       | SSU-rRNA_Hsa-L3         | 1.28  | 0.26  | 0.34 | 0.81 |
| scRNA      | HY4-L58                 | 3.81  | -0.11 | 0.34 | 0.81 |
| mir-5p3pno | hsa-miR-320b            | 4.99  | -0.12 | 0.34 | 0.81 |
| rRNA       | 5S-L583                 | 2.69  | 0.36  | 0.34 | 0.81 |
| mir-3p     | hsa-miR-30d-3p          | 1.67  | -0.24 | 0.34 | 0.81 |
| scRNA      | BC200-L120              | 1.92  | 0.25  | 0.34 | 0.81 |
| scRNA      | HY1-L261                | 1.76  | -0.25 | 0.34 | 0.81 |
| scRNA      | BC200-L140              | 7.01  | 0.09  | 0.34 | 0.81 |
| mir-5p     | hsa-miR-224-5p          | 6.88  | -0.13 | 0.34 | 0.81 |
| tRNA       | chr7.tRNA8-CysGCA       | 1.87  | 0.31  | 0.34 | 0.81 |
| mir-5p     | hsa-miR-125b-5p-L2      | 3.27  | 0.22  | 0.34 | 0.81 |
| mir-5p     | hsa-miR-181a-5p-L2      | 8.55  | -0.08 | 0.34 | 0.81 |
| piRNA      | piR-35469               | 1.70  | 0.22  | 0.35 | 0.81 |
| tRF5       | chr16.tRNA8-ProTGG-tRF5 | 2.11  | 0.26  | 0.35 | 0.81 |
| tRF5       | chr20.tRNA6-LeuAAG-tRF5 | 3.01  | -0.17 | 0.35 | 0.81 |
| snRNA      | U2-L63                  | 2.16  | 0.19  | 0.35 | 0.81 |
| tRNA       | chr18.tRNA4-LysCTT      | 6.31  | 0.14  | 0.35 | 0.81 |
| snoRNA     | HBII-99B                | 1.87  | -0.30 | 0.35 | 0.81 |
| mir-5p     | hsa-miR-3158-5p-L2      | 1.49  | 0.28  | 0.35 | 0.81 |
| snRNA      | U14-L5                  | 4.25  | -0.18 | 0.35 | 0.81 |

|            |                         |       |       |      |      |
|------------|-------------------------|-------|-------|------|------|
| scRNA      | HY5-L9                  | 1.40  | 0.22  | 0.35 | 0.81 |
| scRNA      | BC200-L36               | 2.68  | 0.26  | 0.35 | 0.81 |
| scRNA      | HY1-L155                | 2.69  | 0.16  | 0.35 | 0.81 |
| rRNA       | 5S-L526                 | 1.32  | 0.28  | 0.35 | 0.81 |
| snRNA      | U2-L388                 | 3.41  | 0.16  | 0.35 | 0.81 |
| scRNA      | BC200-L32               | 2.06  | 0.25  | 0.35 | 0.81 |
| mir-5p     | hsa-miR-7-5p-L3         | 1.44  | 0.26  | 0.35 | 0.81 |
| scRNA      | HY1-L183                | 2.44  | 0.15  | 0.35 | 0.81 |
| scRNA      | BC200-L69               | 1.44  | 0.24  | 0.35 | 0.81 |
| mir-3p     | hsa-miR-27a-3p          | 10.82 | -0.08 | 0.35 | 0.81 |
| mir-5p3pno | hsa-miR-4485            | 4.29  | -0.20 | 0.35 | 0.81 |
| scRNA      | HY4-L130                | 14.43 | 0.09  | 0.36 | 0.81 |
| rRNA       | 5S-L957                 | 1.43  | -0.26 | 0.36 | 0.81 |
| piRNA      | piR-36742               | 5.16  | 0.13  | 0.36 | 0.81 |
| mir-3p     | hsa-miR-1273g-3p        | 5.83  | 0.11  | 0.36 | 0.81 |
| mir-5p     | hsa-miR-28-5p           | 5.11  | -0.13 | 0.36 | 0.81 |
| rRNA       | 5S-L98                  | 9.83  | 0.09  | 0.36 | 0.81 |
| snoRNA     | U15A                    | 2.09  | -0.25 | 0.36 | 0.81 |
| scRNA      | HY5-L19                 | 2.11  | 0.19  | 0.36 | 0.81 |
| scRNA      | HY1-L10                 | 1.55  | 0.24  | 0.36 | 0.81 |
| piRNA      | piR-35982-L11           | 1.95  | -0.38 | 0.36 | 0.81 |
| mir-5p     | hsa-miR-409-5p          | 1.55  | -0.28 | 0.36 | 0.81 |
| rRNA       | 5S-L515                 | 2.06  | -0.17 | 0.36 | 0.81 |
| rRNA       | LSU-rRNA_Hsa-L2         | 9.24  | 0.15  | 0.36 | 0.81 |
| tRF5       | chr1.tRNA98-ValCAC-tRF5 | 2.65  | 0.18  | 0.37 | 0.81 |
| tRNA       | chr1.tRNA15-GlnCTG      | 2.98  | -0.14 | 0.37 | 0.81 |
| mir-3p     | hsa-miR-23a-3p          | 6.59  | -0.12 | 0.37 | 0.81 |
| mir-3p     | hsa-miR-323b-3p         | 3.62  | -0.19 | 0.37 | 0.81 |
| scRNA      | HY4-L99                 | 1.47  | -0.21 | 0.37 | 0.81 |
| mir-3p     | hsa-miR-191-3p          | 1.89  | -0.20 | 0.37 | 0.81 |
| rRNA       | SSU-rRNA_Hsa-L72        | 14.26 | 0.07  | 0.37 | 0.81 |
| mir-5p     | hsa-miR-425-5p          | 5.12  | -0.14 | 0.37 | 0.81 |
| snoRNA     | ACA16                   | 2.80  | -0.21 | 0.37 | 0.81 |
| mir-3p     | hsa-let-7d-3p           | 6.61  | -0.13 | 0.37 | 0.81 |
| snoRNA     | ACA8                    | 2.21  | -0.25 | 0.37 | 0.81 |
| tRNA       | chr14.tRNA16-TyrGTA     | 3.58  | 0.22  | 0.37 | 0.81 |
| scRNA      | HY1-L287                | 6.16  | 0.10  | 0.37 | 0.81 |
| mir-5p     | hsa-miR-30b-5p          | 2.47  | 0.18  | 0.37 | 0.82 |
| mir-5p     | hsa-miR-503-5p          | 3.20  | -0.15 | 0.37 | 0.82 |
| tRNA       | chr1.tRNA110-PseudoTTC  | 1.44  | -0.22 | 0.37 | 0.82 |
| piRNA      | piR-52041               | 1.91  | 0.21  | 0.38 | 0.82 |
| scRNA      | HY1-L292                | 5.48  | 0.11  | 0.38 | 0.82 |
| rRNA       | 5S-L1009                | 2.50  | 0.17  | 0.38 | 0.82 |

|            |                         |       |       |      |      |
|------------|-------------------------|-------|-------|------|------|
| piRNA      | piR-44984-L6            | 2.42  | 0.18  | 0.38 | 0.82 |
| scRNA      | HY4-L81                 | 3.17  | -0.14 | 0.38 | 0.82 |
| scRNA      | BC200-L62               | 2.72  | 0.14  | 0.38 | 0.82 |
| mir-3p     | hsa-miR-4446-3p         | 3.56  | -0.15 | 0.38 | 0.82 |
| rRNA       | LSU-rRNA_Hsa-L341       | 1.93  | -0.25 | 0.38 | 0.82 |
| rRNA       | 5S-L1129                | 1.90  | 0.21  | 0.38 | 0.82 |
| tRNA       | chr6.tRNA130-GlnTTG     | 3.35  | 0.15  | 0.38 | 0.82 |
| tRNA       | chr6.tRNA6-ArgACG       | 2.65  | -0.20 | 0.38 | 0.82 |
| snoRNA     | U56                     | 2.63  | -0.22 | 0.38 | 0.82 |
| rRNA       | 5S-L758                 | 2.59  | 0.17  | 0.38 | 0.82 |
| rRNA       | LSU-rRNA_Hsa-L203       | 5.91  | 0.10  | 0.38 | 0.82 |
| scRNA      | HY3-L199                | 1.72  | 0.19  | 0.38 | 0.82 |
| scRNA      | BC200-L11               | 1.53  | 0.24  | 0.38 | 0.82 |
| snoRNA     | HBI-61                  | 3.49  | 0.21  | 0.38 | 0.82 |
| piRNA      | piR-45195-L2            | 1.33  | -0.24 | 0.38 | 0.82 |
| mir-3p     | hsa-miR-144-3p          | 5.77  | 0.12  | 0.38 | 0.82 |
| mir-3p     | hsa-miR-92a-3p          | 11.39 | -0.10 | 0.39 | 0.82 |
| scRNA      | BC200-L95               | 3.20  | 0.19  | 0.39 | 0.82 |
| tRF3       | chr6.tRNA36-ArgACG-tRF3 | 4.47  | 0.19  | 0.39 | 0.82 |
| rRNA       | 5S-L297                 | 1.59  | -0.24 | 0.39 | 0.82 |
| snoRNA     | HBII-180A               | 2.03  | -0.28 | 0.39 | 0.82 |
| mir-5p     | hsa-miR-186-5p          | 6.23  | -0.12 | 0.39 | 0.82 |
| mir-5p3pno | hsa-miR-433             | 3.46  | -0.18 | 0.39 | 0.82 |
| rRNA       | 5S-L550                 | 2.32  | 0.14  | 0.39 | 0.82 |
| mir-5p     | hsa-miR-199a-5p         | 6.35  | -0.11 | 0.39 | 0.82 |
| tRNA       | chr1.tRNA116-GluCTC     | 3.79  | 0.12  | 0.39 | 0.82 |
| scRNA      | BC200-L28               | 2.06  | -0.20 | 0.39 | 0.82 |
| mir-5p3pno | hsa-miR-941             | 6.39  | -0.09 | 0.39 | 0.82 |
| tRNA       | chr14.tRNA12-PseudoTTT  | 1.55  | 0.27  | 0.40 | 0.82 |
| tRNA       | chr2.tRNA13-AlaCGC      | 6.52  | 0.12  | 0.40 | 0.82 |
| mir-5p3pno | hsa-miR-4488            | 1.35  | 0.24  | 0.40 | 0.82 |
| mir-5p     | hsa-miR-1255b-5p-L2     | 1.62  | -0.20 | 0.40 | 0.82 |
| mir-5p     | hsa-miR-106a-5p         | 2.83  | 0.16  | 0.40 | 0.83 |
| mir-5p     | hsa-miR-24-2-5p         | 4.12  | -0.12 | 0.40 | 0.83 |
| rRNA       | 5S-L1071                | 1.54  | 0.19  | 0.40 | 0.83 |
| tRF3       | chr22.tRNA1-SeCTCA-tRF3 | 4.56  | 0.18  | 0.40 | 0.83 |
| scRNA      | HY4-L83                 | 4.19  | -0.12 | 0.40 | 0.83 |
| piRNA      | piR-31925-L8            | 7.36  | -0.12 | 0.40 | 0.83 |
| mir-5p3pno | hsa-miR-942             | 3.31  | 0.15  | 0.40 | 0.83 |
| snoRNA     | U30                     | 6.13  | -0.18 | 0.40 | 0.83 |
| scRNA      | HY1-L111                | 1.94  | 0.20  | 0.41 | 0.83 |
| rRNA       | SSU-rRNA_Hsa-L26        | 3.24  | 0.16  | 0.41 | 0.83 |
| rRNA       | SSU-rRNA_Hsa-L33        | 12.79 | 0.08  | 0.41 | 0.83 |

|            |                            |       |       |      |      |
|------------|----------------------------|-------|-------|------|------|
| piRNA      | piR-35411-L4               | 2.53  | 0.19  | 0.41 | 0.83 |
| snRNA      | U2-L218                    | 1.63  | 0.31  | 0.41 | 0.83 |
| mir-5p     | hsa-miR-1307-5p            | 1.42  | -0.23 | 0.41 | 0.83 |
| tRF3       | chr15.tRNA6-PseudoCTT-tRF3 | 2.01  | -0.22 | 0.41 | 0.83 |
| mir-5p     | hsa-miR-196b-5p            | 2.79  | -0.17 | 0.41 | 0.83 |
| tRNA       | chr14.tRNA4-ThrTGT         | 1.44  | 0.22  | 0.41 | 0.83 |
| piRNA      | piR-38354                  | 2.15  | -0.18 | 0.41 | 0.83 |
| rRNA       | 5S-L397                    | 1.55  | 0.20  | 0.41 | 0.83 |
| tRNA       | chr6.tRNA63-IleTAT         | 1.53  | 0.23  | 0.41 | 0.83 |
| rRNA       | LSU-rRNA_Hsa-L383          | 14.16 | 0.07  | 0.41 | 0.83 |
| scRNA      | HY4-L47                    | 2.67  | -0.15 | 0.41 | 0.83 |
| snRNA      | U2-L765                    | 2.07  | 0.25  | 0.41 | 0.83 |
| rRNA       | 5S-L803                    | 7.74  | 0.08  | 0.41 | 0.83 |
| mir-5p     | hsa-miR-361-5p             | 3.48  | -0.13 | 0.41 | 0.83 |
| mir-3p     | hsa-miR-29a-3p             | 5.96  | -0.10 | 0.41 | 0.83 |
| mir-5p3pno | hsa-miR-4326               | 1.51  | -0.29 | 0.42 | 0.83 |
| tRNA       | chrX.tRNA2-LeuTAA          | 1.38  | -0.23 | 0.42 | 0.83 |
| scRNA      | HY4-L21                    | 2.22  | -0.13 | 0.42 | 0.83 |
| tRF5       | chr8.tRNA12-TyrGTA-tRF5    | 2.21  | 0.28  | 0.42 | 0.83 |
| tRNA       | chr1.tRNA16-HisGTG         | 11.64 | -0.08 | 0.42 | 0.83 |
| scRNA      | HY1                        | 6.00  | 0.09  | 0.42 | 0.83 |
| mir-5p     | hsa-miR-27b-5p             | 1.72  | -0.23 | 0.42 | 0.83 |
| snoRNA     | HBII-135                   | 5.06  | -0.17 | 0.42 | 0.83 |
| piRNA      | piR-31925                  | 11.30 | -0.11 | 0.42 | 0.83 |
| mir-3p     | hsa-miR-330-3p             | 3.77  | -0.11 | 0.42 | 0.83 |
| scRNA      | HY4-L139                   | 10.83 | -0.07 | 0.42 | 0.83 |
| rRNA       | LSU-rRNA_Hsa-L200          | 2.74  | 0.15  | 0.42 | 0.83 |
| tRNA       | chr7.tRNA21-CysGCA         | 1.68  | -0.18 | 0.43 | 0.84 |
| mir-3p     | hsa-miR-582-3p             | 4.81  | -0.13 | 0.43 | 0.84 |
| rRNA       | LSU-rRNA_Hsa-L73           | 2.19  | 0.17  | 0.43 | 0.84 |
| tRNA       | chr17.tRNA16-GlnTTG        | 2.36  | 0.14  | 0.43 | 0.84 |
| rRNA       | 5S-L1217                   | 1.70  | 0.18  | 0.43 | 0.84 |
| scRNA      | HY4-L42                    | 1.44  | -0.19 | 0.43 | 0.84 |
| rRNA       | LSU-rRNA_Hsa-L29           | 2.54  | 0.12  | 0.43 | 0.84 |
| tRNA       | chr1.tRNA2-GlyCCC          | 5.38  | -0.13 | 0.43 | 0.84 |
| piRNA      | piR-33650                  | 3.05  | -0.16 | 0.43 | 0.84 |
| tRNA       | chr1.tRNA58-LeuCAA         | 3.40  | 0.13  | 0.43 | 0.84 |
| mir-3p     | hsa-let-7b-3p              | 3.86  | 0.09  | 0.43 | 0.84 |
| tRNA       | chr16.tRNA29-ProAGG        | 2.96  | 0.15  | 0.43 | 0.84 |
| mir-3p     | hsa-miR-30c-2-3p           | 1.38  | -0.26 | 0.43 | 0.84 |
| scRNA      | HY4-L56                    | 1.82  | -0.16 | 0.44 | 0.84 |
| scRNA      | HY4-L61                    | 5.54  | -0.10 | 0.44 | 0.84 |
| rRNA       | LSU-rRNA_Hsa-L305          | 5.25  | -0.11 | 0.44 | 0.84 |

|            |                             |       |       |      |      |
|------------|-----------------------------|-------|-------|------|------|
| scRNA      | HY4-L30                     | 3.53  | 0.09  | 0.44 | 0.85 |
| scRNA      | HY1-L391                    | 14.88 | 0.08  | 0.44 | 0.85 |
| tRNA       | chr13.tRNA2-PseudoCTC       | 4.77  | -0.09 | 0.44 | 0.85 |
| mir-5p3pno | hsa-miR-375                 | 6.00  | -0.13 | 0.44 | 0.85 |
| tRNA       | chr6.tRNA28-IleAAT          | 3.35  | 0.18  | 0.44 | 0.85 |
| snoRNA     | mgU6-47                     | 1.72  | 0.22  | 0.44 | 0.85 |
| scRNA      | HY4-L116                    | 3.88  | 0.12  | 0.44 | 0.85 |
| rRNA       | 5S-L782                     | 3.63  | 0.10  | 0.44 | 0.85 |
| snRNA      | U1-L142                     | 4.24  | -0.19 | 0.45 | 0.85 |
| mir-3p     | hsa-miR-340-3p              | 4.29  | -0.13 | 0.45 | 0.85 |
| tRF5       | chr6.tRNA56-PheGAA-tRF5     | 1.38  | 0.20  | 0.45 | 0.85 |
| scRNA      | HY1-L273                    | 1.90  | 0.15  | 0.45 | 0.85 |
| mir-3p     | hsa-miR-103a-3p-L2          | 3.33  | -0.12 | 0.45 | 0.85 |
| scRNA      | HY1-L28                     | 1.58  | 0.18  | 0.45 | 0.85 |
| mir-5p     | hsa-miR-155-5p              | 4.35  | 0.09  | 0.45 | 0.85 |
| mir-5p     | hsa-miR-26b-5p              | 8.15  | -0.08 | 0.45 | 0.85 |
| tRNA       | chr2.tRNA1-PseudoCCC        | 5.86  | -0.09 | 0.45 | 0.85 |
| rRNA       | LSU-rRNA_Hsa-L84            | 2.85  | 0.18  | 0.45 | 0.85 |
| scRNA      | BC200-L128                  | 2.65  | 0.14  | 0.45 | 0.85 |
| snRNA      | U1-L71                      | 5.05  | -0.10 | 0.45 | 0.85 |
| scRNA      | BC200-L46                   | 1.64  | -0.22 | 0.45 | 0.85 |
| tRNA       | chr6.tRNA172-SerTGA         | 1.90  | 0.28  | 0.45 | 0.85 |
| snRNA      | U2-L302                     | 4.05  | 0.13  | 0.45 | 0.85 |
| mir-5p3pno | hsa-miR-651                 | 3.29  | -0.13 | 0.46 | 0.85 |
| tRNA       | chr2.tRNA14-TyrATA          | 3.30  | 0.15  | 0.46 | 0.85 |
| scRNA      | HY4-L150                    | 3.26  | 0.13  | 0.46 | 0.85 |
| scRNA      | HY1-L304                    | 3.88  | 0.12  | 0.46 | 0.85 |
| scRNA      | BC200-L29                   | 2.92  | -0.15 | 0.46 | 0.85 |
| scRNA      | HY3-L512                    | 2.06  | 0.28  | 0.46 | 0.85 |
| mir-3p     | hsa-miR-500a-3p             | 3.33  | 0.11  | 0.46 | 0.85 |
| mir-5p     | hsa-miR-301a-5p             | 1.39  | -0.20 | 0.46 | 0.85 |
| mir-3p     | hsa-miR-139-3p              | 3.31  | -0.13 | 0.46 | 0.85 |
| rRNA       | 5S-L586                     | 2.14  | 0.16  | 0.46 | 0.85 |
| tRNA       | chr1.tRNA96-PseudoCCT       | 8.20  | -0.11 | 0.46 | 0.85 |
| tRF5       | chr1.tRNA109-PseudoGTT-tRF5 | 1.70  | -0.20 | 0.46 | 0.85 |
| snoRNA     | U45A                        | 4.15  | -0.12 | 0.46 | 0.85 |
| rRNA       | LSU-rRNA_Hsa-L367           | 7.90  | 0.07  | 0.46 | 0.85 |
| scRNA      | HY1-L443                    | 7.16  | 0.08  | 0.46 | 0.85 |
| piRNA      | piR-48772-L2                | 1.95  | -0.18 | 0.46 | 0.85 |
| scRNA      | HY4-L93                     | 3.97  | -0.09 | 0.47 | 0.85 |
| scRNA      | HY3-L239                    | 1.81  | 0.22  | 0.47 | 0.85 |
| rRNA       | LSU-rRNA_Hsa-L150           | 3.40  | 0.10  | 0.47 | 0.85 |
| mir-3p     | hsa-miR-625-3p              | 4.68  | -0.10 | 0.47 | 0.85 |

|            |                            |      |       |      |      |
|------------|----------------------------|------|-------|------|------|
| tRNA       | chr6.tRNA31-SerGCT         | 3.19 | -0.22 | 0.47 | 0.85 |
| rRNA       | 5S-L955                    | 1.52 | -0.16 | 0.47 | 0.85 |
| mir-5p3pno | hsa-miR-1284               | 1.70 | 0.16  | 0.47 | 0.85 |
| snoRNA     | U53                        | 2.71 | -0.18 | 0.47 | 0.85 |
| snoRNA     | U94                        | 3.12 | -0.17 | 0.47 | 0.85 |
| tRNA       | chr15.tRNA2-LysCTT         | 6.59 | 0.07  | 0.47 | 0.85 |
| piRNA      | piR-33160                  | 1.68 | -0.17 | 0.47 | 0.85 |
| scRNA      | HY1-L324                   | 1.92 | 0.17  | 0.47 | 0.85 |
| tRNA       | chr1.tRNA85-ValCAC         | 3.44 | 0.12  | 0.47 | 0.85 |
| scRNA      | HY1-L435                   | 3.49 | 0.10  | 0.47 | 0.85 |
| tRF3       | chr7.tRNA26-PseudoTTG-tRF3 | 2.25 | -0.17 | 0.47 | 0.85 |
| piRNA      | piR-36499                  | 1.68 | 0.16  | 0.47 | 0.85 |
| piRNA      | piR-43772-L2               | 6.19 | -0.07 | 0.47 | 0.85 |
| rRNA       | 5S-L100                    | 2.88 | 0.15  | 0.47 | 0.85 |
| rRNA       | LSU-rRNA_Hsa-L249          | 7.95 | 0.09  | 0.47 | 0.85 |
| piRNA      | piR-33151-L12              | 2.94 | 0.10  | 0.47 | 0.85 |
| mir-3p     | hsa-miR-574-3p             | 1.66 | -0.18 | 0.47 | 0.85 |
| snoRNA     | U106                       | 1.86 | -0.19 | 0.47 | 0.85 |
| mir-3p     | hsa-miR-374c-3p            | 2.90 | -0.13 | 0.48 | 0.85 |
| mir-3p     | hsa-miR-27b-3p             | 8.94 | -0.07 | 0.48 | 0.85 |
| mir-5p3pno | hsa-miR-134                | 6.74 | -0.12 | 0.48 | 0.85 |
| scRNA      | HY4-L34                    | 1.71 | -0.15 | 0.48 | 0.85 |
| tRF5       | chr6.tRNA114-ArgCCG-tRF5   | 1.61 | -0.18 | 0.48 | 0.86 |
| tRNA       | chr17.tRNA17-SupTTA        | 2.90 | 0.14  | 0.48 | 0.86 |
| tRNA       | chr2.tRNA11-PseudoTTG      | 6.71 | -0.12 | 0.48 | 0.86 |
| tRF3       | chr17.tRNA13-GlyCCC-tRF3   | 5.22 | 0.11  | 0.48 | 0.86 |
| tRNA       | chr1.tRNA119-LysCTT        | 7.12 | 0.08  | 0.48 | 0.86 |
| rRNA       | LSU-rRNA_Hsa-L109          | 1.47 | -0.17 | 0.48 | 0.86 |
| snRNA      | U1-L38                     | 1.64 | 0.21  | 0.48 | 0.86 |
| tRNA       | chr1.tRNA128-LysCTT        | 3.24 | 0.13  | 0.48 | 0.86 |
| rRNA       | LSU-rRNA_Hsa-L161          | 1.84 | 0.17  | 0.49 | 0.86 |
| scRNA      | BC200-L151                 | 2.08 | 0.17  | 0.49 | 0.86 |
| mir-5p3pno | hsa-let-7c-L2              | 5.48 | 0.07  | 0.49 | 0.86 |
| tRNA       | chr1.tRNA9-ArgTCT          | 2.50 | -0.12 | 0.49 | 0.86 |
| snoRNA     | ACA3-2                     | 2.59 | -0.16 | 0.49 | 0.86 |
| scRNA      | HY3-L432                   | 1.48 | -0.15 | 0.49 | 0.86 |
| piRNA      | piR-38600                  | 3.94 | -0.17 | 0.49 | 0.86 |
| scRNA      | BC200-L19                  | 1.37 | -0.25 | 0.49 | 0.86 |
| rRNA       | 5S-L1214                   | 1.33 | -0.17 | 0.49 | 0.86 |
| scRNA      | HY4-L16                    | 3.92 | 0.08  | 0.50 | 0.87 |
| mir-3p     | hsa-miR-29c-3p             | 1.99 | 0.19  | 0.50 | 0.87 |
| snRNA      | U2-L1001                   | 2.25 | -0.14 | 0.50 | 0.87 |
| scRNA      | HY4-L160                   | 7.28 | 0.06  | 0.50 | 0.87 |

|            |                            |       |       |      |      |
|------------|----------------------------|-------|-------|------|------|
| scRNA      | BC200-L91                  | 1.97  | 0.24  | 0.50 | 0.87 |
| mir-5p     | hsa-miR-339-5p             | 1.85  | -0.26 | 0.50 | 0.87 |
| scRNA      | HY4-L44                    | 1.59  | -0.15 | 0.50 | 0.87 |
| tRNA       | chr16.tRNA32-LysCTT        | 2.11  | -0.13 | 0.50 | 0.87 |
| rRNA       | 5S-L99                     | 8.58  | 0.08  | 0.50 | 0.87 |
| mir-3p     | hsa-miR-106b-3p            | 7.66  | -0.07 | 0.50 | 0.87 |
| rRNA       | LSU-rRNA_Hsa-L295          | 3.46  | 0.11  | 0.50 | 0.87 |
| piRNA      | piR-32377                  | 6.91  | -0.08 | 0.50 | 0.87 |
| rRNA       | LSU-rRNA_Hsa-L67           | 3.16  | 0.19  | 0.50 | 0.87 |
| scRNA      | HY1-L280                   | 2.44  | 0.12  | 0.51 | 0.87 |
| piRNA      | piR-33082-L2               | 1.79  | -0.16 | 0.51 | 0.87 |
| mir-5p3pno | hsa-miR-378e               | 1.49  | -0.16 | 0.51 | 0.87 |
| tRF3       | chr20.tRNA4-PseudoTAA-tRF3 | 4.75  | -0.10 | 0.51 | 0.87 |
| mir-3p     | hsa-miR-29b-3p             | 2.25  | -0.14 | 0.51 | 0.87 |
| mir-5p     | hsa-miR-191-5p             | 8.87  | -0.06 | 0.51 | 0.87 |
| snoRNA     | U24                        | 2.09  | -0.18 | 0.51 | 0.87 |
| tRNA       | chr16.tRNA7-LysCTT         | 2.24  | 0.17  | 0.51 | 0.87 |
| scRNA      | HY4-L53                    | 3.75  | -0.07 | 0.51 | 0.87 |
| scRNA      | HY4-L59                    | 4.56  | -0.07 | 0.51 | 0.87 |
| mir-5p     | hsa-miR-3614-5p            | 1.91  | 0.18  | 0.52 | 0.87 |
| mir-5p3pno | hsa-miR-326                | 1.98  | 0.13  | 0.52 | 0.87 |
| tRF3       | chr12.tRNA7-AspGTC-tRF3    | 1.65  | -0.20 | 0.52 | 0.87 |
| mir-5p3pno | hsa-miR-4473               | 1.40  | -0.21 | 0.52 | 0.87 |
| mir-5p     | hsa-miR-122-5p             | 9.88  | 0.13  | 0.52 | 0.87 |
| mir-5p3pno | hsa-miR-1299               | 2.07  | -0.21 | 0.52 | 0.87 |
| tRNA       | chr2.tRNA3-AlaAGC          | 3.59  | 0.16  | 0.52 | 0.87 |
| scRNA      | HY1-L208                   | 3.29  | 0.10  | 0.52 | 0.87 |
| mir-5p3pno | hsa-miR-889                | 2.82  | -0.16 | 0.52 | 0.87 |
| mir-5p     | hsa-miR-452-5p             | 1.74  | -0.18 | 0.52 | 0.87 |
| rRNA       | LSU-rRNA_Hsa-L202          | 3.79  | 0.10  | 0.52 | 0.87 |
| scRNA      | HY1-L13                    | 2.51  | 0.11  | 0.52 | 0.87 |
| mir-3p     | hsa-miR-369-3p             | 1.38  | 0.21  | 0.52 | 0.87 |
| rRNA       | SSU-rRNA_Hsa-L46           | 6.10  | 0.10  | 0.52 | 0.87 |
| tRNA       | chr16.tRNA24-GlyGCC        | 15.82 | -0.08 | 0.52 | 0.87 |
| mir-3p     | hsa-miR-629-3p             | 1.42  | 0.16  | 0.53 | 0.87 |
| mir-5p     | hsa-miR-144-5p             | 5.62  | 0.09  | 0.53 | 0.87 |
| tRNA       | chr6.tRNA157-ValCAC        | 1.40  | -0.17 | 0.53 | 0.87 |
| snoRNA     | U45B                       | 2.57  | -0.16 | 0.53 | 0.87 |
| mir-3p     | hsa-miR-30e-3p             | 8.45  | -0.05 | 0.53 | 0.87 |
| snRNA      | U1-L8                      | 6.14  | 0.09  | 0.53 | 0.87 |
| piRNA      | piR-49143                  | 11.96 | -0.06 | 0.53 | 0.87 |
| rRNA       | 5S-L282                    | 1.46  | 0.15  | 0.53 | 0.87 |
| mir-3p     | hsa-miR-423-3p             | 8.89  | -0.06 | 0.53 | 0.87 |

|            |                            |       |       |      |      |
|------------|----------------------------|-------|-------|------|------|
| rRNA       | LSU-rRNA_Hsa-L323          | 8.20  | 0.10  | 0.53 | 0.87 |
| tRNA       | chr14.tRNA23-ProAGG        | 2.14  | 0.15  | 0.53 | 0.87 |
| mir-3p     | hsa-miR-652-3p             | 3.92  | -0.09 | 0.53 | 0.87 |
| tRNA       | chr2.tRNA27-GlyCCC         | 8.80  | -0.09 | 0.53 | 0.87 |
| tRNA       | chr11.tRNA12-ProTGG        | 8.16  | -0.08 | 0.53 | 0.87 |
| scRNA      | HY4-L3                     | 2.42  | -0.10 | 0.53 | 0.87 |
| scRNA      | BC200-L18                  | 3.08  | 0.12  | 0.53 | 0.87 |
| mir-5p     | hsa-miR-17-5p              | 5.08  | -0.09 | 0.53 | 0.87 |
| mir-3p     | hsa-miR-197-3p             | 2.69  | -0.13 | 0.53 | 0.87 |
| mir-5p     | hsa-miR-125a-5p            | 4.98  | -0.11 | 0.53 | 0.87 |
| scRNA      | BC200-L138                 | 4.89  | 0.10  | 0.53 | 0.87 |
| mir-5p3pno | hsa-miR-1976               | 1.89  | -0.14 | 0.54 | 0.87 |
| piRNA      | piR-35982                  | 15.63 | -0.12 | 0.54 | 0.87 |
| mir-3p     | hsa-miR-92b-3p             | 4.74  | -0.07 | 0.54 | 0.87 |
| mir-5p     | hsa-miR-130b-5p            | 4.40  | -0.12 | 0.54 | 0.87 |
| snoRNA     | HBII-82B                   | 2.38  | -0.18 | 0.54 | 0.87 |
| mir-5p     | hsa-miR-4433-5p            | 5.15  | -0.11 | 0.54 | 0.87 |
| rRNA       | LSU-rRNA_Hsa-L162          | 2.42  | -0.11 | 0.54 | 0.87 |
| rRNA       | LSU-rRNA_Hsa-L39           | 7.57  | -0.08 | 0.54 | 0.87 |
| scRNA      | HY3-L120                   | 2.34  | -0.12 | 0.54 | 0.87 |
| rRNA       | 5S-L111                    | 10.31 | 0.06  | 0.54 | 0.87 |
| tRNA       | chr1.tRNA102-PseudoTTC     | 6.55  | 0.06  | 0.55 | 0.87 |
| mir-5p     | hsa-miR-335-5p             | 3.57  | -0.08 | 0.55 | 0.87 |
| mir-3p     | hsa-miR-374b-3p            | 2.49  | 0.14  | 0.55 | 0.87 |
| piRNA      | piR-49144                  | 7.05  | -0.06 | 0.55 | 0.87 |
| mir-3p     | hsa-miR-222-3p             | 8.33  | -0.08 | 0.55 | 0.87 |
| rRNA       | 5S-L489                    | 5.18  | -0.43 | 0.55 | 0.87 |
| tRNA       | chr14.tRNA19-TyrGTA        | 2.52  | 0.13  | 0.55 | 0.87 |
| mir-5p     | hsa-miR-148a-5p            | 4.17  | -0.08 | 0.55 | 0.87 |
| tRF3       | chr18.tRNA2-PseudoTCC-tRF3 | 3.09  | -0.13 | 0.55 | 0.87 |
| rRNA       | LSU-rRNA_Hsa-L221          | 2.74  | 0.13  | 0.55 | 0.87 |
| scRNA      | HY3-L272                   | 1.38  | 0.15  | 0.55 | 0.87 |
| snoRNA     | U51                        | 2.71  | 0.18  | 0.55 | 0.87 |
| mir-5p3pno | hsa-miR-107                | 1.72  | -0.14 | 0.55 | 0.87 |
| mir-5p     | hsa-miR-181b-5p-L2         | 6.05  | -0.06 | 0.55 | 0.87 |
| piRNA      | piR-61174                  | 1.23  | 0.19  | 0.55 | 0.87 |
| mir-3p     | hsa-miR-16-2-3p            | 7.97  | -0.08 | 0.55 | 0.87 |
| rRNA       | 5S-L746                    | 2.21  | 0.17  | 0.55 | 0.87 |
| mir-5p     | hsa-miR-96-5p              | 2.20  | -0.17 | 0.55 | 0.87 |
| scRNA      | HY1-L434                   | 6.45  | 0.07  | 0.55 | 0.87 |
| scRNA      | BC200-L16                  | 1.59  | 0.21  | 0.56 | 0.87 |
| snoRNA     | U13-L162                   | 2.03  | 0.12  | 0.56 | 0.87 |
| rRNA       | LSU-rRNA_Hsa-L159          | 2.57  | 0.10  | 0.56 | 0.87 |



|            |                            |       |       |      |      |
|------------|----------------------------|-------|-------|------|------|
| piRNA      | piR-44716                  | 4.74  | -0.26 | 0.56 | 0.87 |
| scRNA      | HY1-L57                    | 2.78  | 0.10  | 0.56 | 0.87 |
| mir-5p     | hsa-miR-331-5p             | 1.28  | -0.17 | 0.56 | 0.87 |
| tRNA       | chr9.tRNA4-ArgTCT          | 1.63  | -0.17 | 0.56 | 0.87 |
| piRNA      | piR-47305                  | 9.66  | -0.08 | 0.56 | 0.87 |
| rRNA       | 5S-L1178                   | 1.51  | 0.13  | 0.56 | 0.87 |
| scRNA      | HY4-L57                    | 2.80  | -0.10 | 0.56 | 0.87 |
| mir-3p     | hsa-miR-200c-3p            | 2.75  | 0.10  | 0.56 | 0.87 |
| scRNA      | HY4-L46                    | 9.09  | 0.05  | 0.56 | 0.87 |
| rRNA       | LSU-rRNA_Hsa-L333          | 4.08  | 0.09  | 0.56 | 0.87 |
| tRNA       | chr17.tRNA14-ThrCGT        | 1.87  | 0.20  | 0.56 | 0.87 |
| scRNA      | HY4-L149                   | 1.76  | 0.13  | 0.56 | 0.87 |
| piRNA      | piR-51810-L2               | 8.21  | -0.08 | 0.56 | 0.87 |
| snoRNA     | ACA51                      | 2.14  | -0.12 | 0.56 | 0.87 |
| rRNA       | LSU-rRNA_Hsa-L360          | 1.84  | 0.11  | 0.57 | 0.87 |
| rRNA       | 5S-L621                    | 1.23  | 0.17  | 0.57 | 0.87 |
| snRNA      | U4-L24                     | 1.61  | -0.16 | 0.57 | 0.87 |
| scRNA      | HY1-L143                   | 2.32  | -0.11 | 0.57 | 0.87 |
| snoRNA     | U83A                       | 3.52  | -0.11 | 0.57 | 0.87 |
| mir-5p3pno | hsa-miR-1301               | 4.06  | -0.09 | 0.57 | 0.87 |
| piRNA      | piR-52416                  | 1.72  | 0.23  | 0.57 | 0.87 |
| mir-3p     | hsa-let-7f-1-3p            | 1.62  | -0.18 | 0.57 | 0.87 |
| mir-5p3pno | hsa-miR-1278               | 1.56  | -0.19 | 0.57 | 0.87 |
| tRNA       | chr10.tRNA6-ValTAC         | 1.49  | -0.16 | 0.57 | 0.87 |
| mir-5p3pno | hsa-miR-451b               | 2.85  | -0.12 | 0.57 | 0.87 |
| mir-5p     | hsa-miR-877-5p             | 2.35  | -0.12 | 0.57 | 0.87 |
| rRNA       | LSU-rRNA_Hsa-L348          | 1.92  | 0.17  | 0.57 | 0.87 |
| mir-5p     | hsa-miR-532-5p             | 7.72  | -0.05 | 0.57 | 0.87 |
| scRNA      | HY3-L492                   | 1.45  | 0.16  | 0.57 | 0.87 |
| scRNA      | HY1-L192                   | 5.99  | 0.06  | 0.57 | 0.87 |
| tRF5       | chr18.tRNA3-PseudoTCC-tRF5 | 1.35  | 0.23  | 0.57 | 0.87 |
| snRNA      | U5-L3                      | 2.02  | 0.14  | 0.57 | 0.87 |
| snRNA      | U6-L1308                   | 2.67  | -0.12 | 0.57 | 0.87 |
| mir-5p     | hsa-miR-450b-5p            | 5.25  | 0.08  | 0.57 | 0.87 |
| tRF5       | chr11.tRNA16-ValTAC-tRF5   | 1.57  | 0.14  | 0.58 | 0.87 |
| tRNA       | chr1.tRNA43-GlyGCC         | 6.87  | -0.09 | 0.58 | 0.87 |
| rRNA       | 5S-L102                    | 7.36  | 0.06  | 0.58 | 0.87 |
| scRNA      | BC200-L156                 | 2.60  | -0.10 | 0.58 | 0.87 |
| tRNA       | chr6.tRNA123-SerGCT        | 2.23  | 0.12  | 0.58 | 0.87 |
| piRNA      | piR-41209                  | 2.58  | 0.10  | 0.58 | 0.87 |
| tRNA       | chr6.tRNA86-PseudoTAC      | 2.07  | -0.15 | 0.58 | 0.87 |
| mir-5p3pno | hsa-miR-370                | 4.87  | -0.13 | 0.58 | 0.87 |
| tRNA       | chr13.tRNA3-GluTTC         | 10.17 | 0.06  | 0.58 | 0.87 |

|        |                             |       |       |      |      |
|--------|-----------------------------|-------|-------|------|------|
| rRNA   | SSU-rRNA_Hsa-L34            | 5.52  | 0.07  | 0.58 | 0.87 |
| tRNA   | chr17.tRNA15-CysGCA         | 6.11  | -0.06 | 0.58 | 0.87 |
| snRNA  | U5-L66                      | 6.99  | 0.07  | 0.58 | 0.87 |
| scRNA  | HY3-L196                    | 1.85  | -0.12 | 0.58 | 0.87 |
| tRNA   | chr1.tRNA60-PseudoTAA       | 3.73  | -0.09 | 0.58 | 0.87 |
| scRNA  | HY1-L326                    | 1.43  | 0.13  | 0.58 | 0.87 |
| tRNA   | chr6.tRNA82-GlyGCC          | 5.27  | -0.10 | 0.58 | 0.87 |
| mir-3p | hsa-miR-23b-3p              | 3.56  | -0.10 | 0.58 | 0.87 |
| scRNA  | HY1-L67                     | 6.00  | 0.07  | 0.58 | 0.87 |
| mir-3p | hsa-miR-181c-3p             | 1.57  | -0.13 | 0.59 | 0.87 |
| piRNA  | piR-53129                   | 1.55  | 0.15  | 0.59 | 0.87 |
| mir-3p | hsa-miR-99b-3p              | 3.53  | 0.09  | 0.59 | 0.87 |
| tRNA   | chr6.tRNA14-TyrGTA          | 1.90  | 0.15  | 0.59 | 0.87 |
| tRF5   | chr6.tRNA129-MetCAT-tRF5    | 2.00  | -0.13 | 0.59 | 0.87 |
| mir-3p | hsa-miR-101-3p              | 10.61 | -0.07 | 0.59 | 0.87 |
| scRNA  | HY3-L372                    | 2.47  | -0.13 | 0.59 | 0.87 |
| mir-5p | hsa-let-7d-5p               | 8.11  | -0.06 | 0.59 | 0.87 |
| scRNA  | BC200-L110                  | 1.47  | 0.16  | 0.59 | 0.87 |
| tRF3   | chr9.tRNA6-AspGTC-tRF3      | 1.45  | -0.14 | 0.59 | 0.87 |
| scRNA  | HY1-L26                     | 2.97  | -0.08 | 0.59 | 0.87 |
| tRF3   | chr19.tRNA9-PseudoTTT-tRF3  | 1.65  | 0.15  | 0.59 | 0.87 |
| tRNA   | chr16.tRNA10-LysCTT         | 4.96  | 0.07  | 0.59 | 0.87 |
| tRNA   | chr6.tRNA138-ArgACG         | 1.66  | 0.17  | 0.59 | 0.88 |
| snoRNA | ACA9                        | 1.70  | -0.15 | 0.59 | 0.88 |
| tRNA   | chr1.tRNA99-ValCAC          | 8.58  | -0.08 | 0.60 | 0.88 |
| rRNA   | 5S-L303                     | 2.33  | 0.14  | 0.60 | 0.88 |
| piRNA  | piR-33082                   | 7.18  | -0.06 | 0.60 | 0.88 |
| snoRNA | U85                         | 3.06  | -0.10 | 0.60 | 0.88 |
| tRNA   | chr3.tRNA7-CysGCA           | 1.80  | -0.11 | 0.60 | 0.88 |
| piRNA  | piR-41588                   | 1.60  | -0.15 | 0.60 | 0.88 |
| piRNA  | piR-35413-L2                | 1.56  | 0.11  | 0.60 | 0.88 |
| rRNA   | LSU-rRNA_Hsa-L378           | 2.46  | -0.14 | 0.60 | 0.88 |
| tRF5   | chr1.tRNA132-PseudoCAC-tRF5 | 2.10  | -0.12 | 0.60 | 0.88 |
| rRNA   | LSU-rRNA_Hsa-L220           | 4.41  | -0.09 | 0.60 | 0.88 |
| rRNA   | LSU-rRNA_Hsa-L144           | 1.61  | 0.13  | 0.61 | 0.88 |
| tRNA   | chrX.tRNA4-ValTAC           | 5.20  | -0.09 | 0.61 | 0.88 |
| scRNA  | HY4-L41                     | 1.86  | 0.09  | 0.61 | 0.88 |
| snoRNA | U58B                        | 4.91  | -0.09 | 0.61 | 0.88 |
| rRNA   | 5S-L61                      | 2.67  | 0.09  | 0.61 | 0.88 |
| scRNA  | HY1-L414                    | 1.30  | 0.14  | 0.61 | 0.89 |
| rRNA   | LSU-rRNA_Hsa-L214           | 2.13  | 0.23  | 0.61 | 0.89 |
| piRNA  | piR-35284                   | 8.07  | -0.09 | 0.61 | 0.89 |
| tRNA   | chr11.tRNA16-ValTAC         | 4.20  | -0.07 | 0.61 | 0.89 |

|            |                          |       |       |      |      |
|------------|--------------------------|-------|-------|------|------|
| snoRNA     | U38B                     | 2.95  | -0.11 | 0.61 | 0.89 |
| tRNA       | chr16.tRNA22-MetCAT      | 3.03  | 0.09  | 0.61 | 0.89 |
| mir-5p     | hsa-miR-221-5p           | 3.85  | -0.07 | 0.62 | 0.89 |
| piRNA      | piR-32678-L3             | 10.98 | -0.05 | 0.62 | 0.89 |
| snoRNA     | U100                     | 1.54  | -0.15 | 0.62 | 0.89 |
| scRNA      | HY4-L122                 | 7.82  | 0.04  | 0.62 | 0.89 |
| rRNA       | 5S-L191                  | 4.70  | 0.07  | 0.62 | 0.89 |
| piRNA      | piR-57824                | 1.45  | -0.15 | 0.62 | 0.89 |
| snoRNA     | ACA21                    | 2.76  | 0.12  | 0.62 | 0.89 |
| tRNA       | chr2.tRNA23-GlnTTG       | 3.06  | -0.14 | 0.62 | 0.90 |
| piRNA      | piR-43325-L7             | 3.82  | 0.09  | 0.63 | 0.90 |
| scRNA      | HY4-L71                  | 5.97  | -0.05 | 0.63 | 0.90 |
| rRNA       | 5S-L115                  | 1.96  | 0.12  | 0.63 | 0.90 |
| rRNA       | 5S-L935                  | 2.94  | -0.09 | 0.63 | 0.90 |
| rRNA       | 5S-L103                  | 3.03  | -0.09 | 0.63 | 0.90 |
| mir-3p     | hsa-miR-3591-3p          | 12.23 | 0.11  | 0.63 | 0.90 |
| tRNA       | chr1.tRNA18-PseudoCCT    | 1.66  | 0.13  | 0.63 | 0.90 |
| piRNA      | piR-60565-L9             | 1.88  | -0.12 | 0.63 | 0.90 |
| mir-5p     | hsa-miR-486-5p           | 13.44 | -0.06 | 0.63 | 0.90 |
| rRNA       | SSU-rRNA_Hsa-L65         | 4.29  | 0.07  | 0.63 | 0.90 |
| snoRNA     | U83                      | 2.97  | 0.11  | 0.64 | 0.90 |
| rRNA       | LSU-rRNA_Hsa-L309        | 8.19  | -0.07 | 0.64 | 0.90 |
| rRNA       | LSU-rRNA_Hsa-L211        | 1.63  | 0.10  | 0.64 | 0.90 |
| rRNA       | 5S-L1115                 | 1.30  | 0.15  | 0.64 | 0.90 |
| rRNA       | LSU-rRNA_Hsa-L193        | 7.16  | 0.06  | 0.64 | 0.90 |
| mir-5p     | hsa-miR-10a-5p           | 8.93  | 0.06  | 0.64 | 0.90 |
| scRNA      | HY4-L69                  | 9.89  | 0.04  | 0.64 | 0.90 |
| scRNA      | HY1-L159                 | 4.34  | 0.07  | 0.64 | 0.90 |
| mir-5p     | hsa-miR-100-5p           | 6.59  | 0.07  | 0.64 | 0.90 |
| scRNA      | HY4-L66                  | 7.15  | 0.04  | 0.64 | 0.90 |
| snRNA      | U5-L76                   | 2.57  | -0.11 | 0.65 | 0.90 |
| scRNA      | HY4-L100                 | 3.24  | 0.08  | 0.65 | 0.90 |
| scRNA      | HY4-L138                 | 8.42  | 0.04  | 0.65 | 0.90 |
| mir-5p3pno | hsa-miR-4472-L2          | 1.83  | 0.11  | 0.65 | 0.90 |
| piRNA      | piR-31925-L9             | 13.82 | -0.06 | 0.65 | 0.90 |
| mir-5p3pno | hsa-miR-378c             | 5.35  | 0.06  | 0.65 | 0.90 |
| rRNA       | 5S-L247                  | 1.54  | 0.10  | 0.65 | 0.90 |
| scRNA      | HY1-L37                  | 6.31  | 0.05  | 0.65 | 0.90 |
| piRNA      | piR-51119                | 2.10  | -0.14 | 0.65 | 0.91 |
| tRF5       | chr17.tRNA25-SeCTCA-tRF5 | 2.25  | 0.10  | 0.65 | 0.91 |
| mir-3p     | hsa-miR-671-3p           | 4.05  | -0.07 | 0.65 | 0.91 |
| snoRNA     | U18C                     | 1.82  | 0.15  | 0.65 | 0.91 |
| rRNA       | 5S-L389                  | 1.35  | 0.15  | 0.65 | 0.91 |

|            |                          |       |       |      |      |
|------------|--------------------------|-------|-------|------|------|
| snoRNA     | U35A                     | 1.80  | -0.13 | 0.65 | 0.91 |
| mir-3p     | hsa-miR-4677-3p          | 1.78  | -0.11 | 0.65 | 0.91 |
| mir-5p3pno | hsa-miR-320c             | 4.43  | 0.05  | 0.66 | 0.91 |
| scRNA      | HY4-L14                  | 8.83  | 0.04  | 0.66 | 0.91 |
| scRNA      | BC200-L43                | 3.28  | -0.08 | 0.66 | 0.91 |
| tRF5       | chr5.tRNA22-AspGTC-tRF5  | 2.30  | 0.11  | 0.66 | 0.91 |
| scRNA      | BC200-L135               | 2.24  | 0.11  | 0.66 | 0.91 |
| rRNA       | 5S-L253                  | 3.20  | 0.07  | 0.66 | 0.91 |
| scRNA      | BC200-L54                | 4.73  | 0.07  | 0.66 | 0.91 |
| scRNA      | HY4-L38                  | 4.19  | -0.06 | 0.66 | 0.91 |
| piRNA      | piR-37213                | 1.60  | 0.12  | 0.66 | 0.91 |
| tRNA       | chr16.tRNA16-LeuAAG      | 3.29  | -0.08 | 0.66 | 0.91 |
| mir-3p     | hsa-miR-2355-3p          | 1.86  | -0.11 | 0.66 | 0.91 |
| mir-5p3pno | hsa-miR-511-L2           | 3.90  | -0.09 | 0.66 | 0.91 |
| scRNA      | HY3-L524                 | 1.56  | -0.11 | 0.66 | 0.91 |
| tRF5       | chr1.tRNA118-HisGTG-tRF5 | 1.83  | 0.13  | 0.66 | 0.91 |
| rRNA       | LSU-rRNA_Hsa-L164        | 5.97  | -0.06 | 0.67 | 0.91 |
| tRNA       | chr6.tRNA136-ValAAC      | 2.04  | 0.10  | 0.67 | 0.91 |
| scRNA      | BC200-L9                 | 2.83  | 0.06  | 0.67 | 0.91 |
| tRNA       | chr14.tRNA7-ArgACG       | 1.75  | 0.10  | 0.67 | 0.91 |
| mir-5p     | hsa-miR-150-5p           | 5.10  | -0.08 | 0.67 | 0.91 |
| rRNA       | SSU-rRNA_Hsa-L25         | 4.08  | -0.06 | 0.67 | 0.91 |
| tRNA       | chr17.tRNA5-GlyGCC       | 7.52  | -0.05 | 0.67 | 0.91 |
| scRNA      | HY4-L142                 | 3.10  | 0.06  | 0.67 | 0.91 |
| tRNA       | chr1.tRNA106-HisGTG      | 3.36  | -0.06 | 0.67 | 0.92 |
| mir-3p     | hsa-miR-26b-3p           | 2.34  | -0.11 | 0.68 | 0.92 |
| scRNA      | BC200-L37                | 6.33  | -0.05 | 0.68 | 0.92 |
| mir-5p3pno | hsa-miR-1250             | 1.50  | -0.11 | 0.68 | 0.92 |
| rRNA       | 5S-L357                  | 2.11  | 0.09  | 0.68 | 0.92 |
| snoRNA     | U36B                     | 1.73  | -0.16 | 0.68 | 0.92 |
| snRNA      | U1-L78                   | 1.40  | 0.12  | 0.68 | 0.92 |
| mir-5p     | hsa-miR-26a-5p-L2        | 10.75 | -0.04 | 0.68 | 0.92 |
| mir-5p     | hsa-miR-485-5p           | 4.20  | -0.08 | 0.68 | 0.92 |
| rRNA       | 5S-L136                  | 1.53  | -0.10 | 0.68 | 0.92 |
| mir-3p     | hsa-miR-3913-3p          | 1.59  | -0.10 | 0.68 | 0.92 |
| tRNA       | chr22.tRNA1-SeCTCA       | 2.22  | 0.08  | 0.69 | 0.92 |
| tRNA       | chr11.tRNA8-SerGCT       | 4.09  | -0.08 | 0.69 | 0.92 |
| snRNA      | U17                      | 1.81  | 0.10  | 0.69 | 0.92 |
| scRNA      | HY1-L409                 | 2.73  | 0.07  | 0.69 | 0.92 |
| scRNA      | BC200-L60                | 2.38  | 0.09  | 0.69 | 0.92 |
| mir-5p3pno | hsa-miR-1180             | 4.05  | -0.06 | 0.69 | 0.92 |
| piRNA      | piR-60576-L6             | 8.04  | -0.06 | 0.69 | 0.92 |
| mir-5p     | hsa-miR-32-5p            | 3.62  | -0.06 | 0.69 | 0.92 |

|            |                           |       |       |      |      |
|------------|---------------------------|-------|-------|------|------|
| snoRNA     | HBII-82                   | 2.14  | -0.16 | 0.69 | 0.92 |
| mir-5p3pno | hsa-miR-3168              | 2.09  | 0.13  | 0.69 | 0.92 |
| scRNA      | HY3-L82                   | 3.20  | -0.06 | 0.69 | 0.92 |
| rRNA       | LSU-rRNA_Hsa-L380         | 13.98 | -0.04 | 0.69 | 0.92 |
| scRNA      | HY1-L226                  | 3.29  | 0.06  | 0.69 | 0.92 |
| mir-3p     | hsa-miR-3613-3p           | 1.73  | 0.14  | 0.69 | 0.92 |
| piRNA      | piR-35952-L4              | 3.22  | -0.10 | 0.70 | 0.92 |
| scRNA      | BC200-L72                 | 1.58  | 0.12  | 0.70 | 0.92 |
| scRNA      | HY4-L120                  | 9.92  | 0.03  | 0.70 | 0.92 |
| mir-5p3pno | hsa-miR-133a              | 1.55  | 0.16  | 0.70 | 0.92 |
| scRNA      | HY4-L72                   | 7.28  | 0.04  | 0.70 | 0.92 |
| tRF5       | chrX.tRNA1-PseudoTTG-tRF5 | 2.77  | -0.09 | 0.70 | 0.92 |
| piRNA      | piR-60565-L12             | 10.99 | 0.05  | 0.70 | 0.92 |
| snoRNA     | ACA34                     | 4.14  | -0.06 | 0.70 | 0.92 |
| tRNA       | chr6.tRNA153-IleAAT       | 1.68  | -0.12 | 0.70 | 0.92 |
| tRF5       | chr3.tRNA5-LeuAAG-tRF5    | 3.59  | -0.05 | 0.70 | 0.92 |
| tRNA       | chr1.tRNA137-Pseudo???    | 6.02  | -0.08 | 0.70 | 0.92 |
| rRNA       | LSU-rRNA_Hsa-L140         | 4.43  | 0.07  | 0.70 | 0.92 |
| scRNA      | HY3-L382                  | 1.28  | -0.11 | 0.70 | 0.92 |
| tRNA       | chr1.tRNA52-ProCGG        | 2.13  | 0.08  | 0.70 | 0.92 |
| tRNA       | chr17.tRNA13-GlyCCC       | 5.82  | -0.06 | 0.70 | 0.92 |
| scRNA      | HY3-L140                  | 2.65  | -0.07 | 0.71 | 0.93 |
| tRF3       | chrX.tRNA2-LeuTAA-tRF3    | 1.82  | -0.11 | 0.71 | 0.93 |
| rRNA       | LSU-rRNA_Hsa-L252         | 2.98  | 0.06  | 0.71 | 0.93 |
| snoRNA     | U29                       | 5.29  | -0.08 | 0.71 | 0.93 |
| tRNA       | chr1.tRNA5-GluTTC         | 5.89  | -0.07 | 0.71 | 0.93 |
| snoRNA     | E3                        | 2.67  | 0.07  | 0.71 | 0.93 |
| tRNA       | chr1.tRNA117-GlyTCC       | 2.71  | -0.06 | 0.71 | 0.93 |
| scRNA      | HY4-L35                   | 7.15  | 0.04  | 0.71 | 0.93 |
| mir-3p     | hsa-miR-363-3p            | 7.85  | -0.05 | 0.71 | 0.93 |
| scRNA      | HY1-L179                  | 6.39  | 0.04  | 0.71 | 0.93 |
| tRF5       | chr4.tRNA3-CysGCA-tRF5    | 1.61  | 0.10  | 0.71 | 0.93 |
| rRNA       | LSU-rRNA_Hsa-L34          | 1.35  | 0.11  | 0.72 | 0.93 |
| scRNA      | HY4-L111                  | 9.50  | 0.03  | 0.72 | 0.93 |
| rRNA       | LSU-rRNA_Hsa-L48          | 1.64  | 0.12  | 0.72 | 0.93 |
| rRNA       | 5S-L21                    | 2.71  | 0.06  | 0.72 | 0.93 |
| scRNA      | HY3-L359                  | 1.92  | -0.08 | 0.72 | 0.93 |
| rRNA       | LSU-rRNA_Hsa-L42          | 1.88  | -0.09 | 0.72 | 0.93 |
| rRNA       | 5S-L344                   | 2.37  | 0.07  | 0.72 | 0.93 |
| tRF3       | chr14.tRNA14-GluTTC-tRF3  | 2.02  | 0.17  | 0.72 | 0.93 |
| mir-5p     | hsa-miR-450a-5p           | 3.31  | -0.07 | 0.72 | 0.93 |
| rRNA       | LSU-rRNA_Hsa-L388         | 10.79 | 0.03  | 0.72 | 0.93 |
| mir-5p3pno | hsa-miR-378g              | 2.04  | -0.07 | 0.72 | 0.93 |

|            |                         |       |       |      |      |
|------------|-------------------------|-------|-------|------|------|
| scRNA      | HY4-L153                | 8.62  | 0.03  | 0.72 | 0.93 |
| mir-5p     | hsa-miR-1228-5p         | 2.00  | -0.10 | 0.72 | 0.93 |
| rRNA       | 5S-L578                 | 2.37  | -0.08 | 0.73 | 0.93 |
| piRNA      | piR-36743               | 3.67  | -0.06 | 0.73 | 0.93 |
| snoRNA     | HBI-43                  | 3.60  | -0.06 | 0.73 | 0.93 |
| tRNA       | chr5.tRNA4-ValAAC       | 2.29  | -0.08 | 0.73 | 0.93 |
| scRNA      | HY1-L212                | 2.69  | 0.06  | 0.73 | 0.93 |
| tRF5       | chr19.tRNA5-LysCTT-tRF5 | 4.33  | 0.07  | 0.73 | 0.93 |
| tRF5       | chr14.tRNA4-ThrTGT-tRF5 | 2.23  | -0.07 | 0.73 | 0.94 |
| mir-5p     | hsa-miR-200c-5p         | 2.02  | -0.09 | 0.74 | 0.94 |
| tRNA       | chr6.tRNA175-SerGCT     | 2.06  | 0.14  | 0.74 | 0.94 |
| scRNA      | HY1-L149                | 3.78  | -0.05 | 0.74 | 0.94 |
| piRNA      | piR-60577-L3            | 7.08  | -0.04 | 0.74 | 0.94 |
| mir-5p     | hsa-miR-193b-5p         | 2.08  | 0.08  | 0.74 | 0.94 |
| rRNA       | 5S-L1068                | 2.39  | 0.05  | 0.74 | 0.94 |
| mir-5p     | hsa-miR-145-5p          | 1.79  | 0.08  | 0.74 | 0.94 |
| mir-5p3pno | hsa-miR-548k            | 1.89  | -0.09 | 0.74 | 0.94 |
| tRNA       | chr6.tRNA152-ValCAC     | 8.52  | -0.04 | 0.74 | 0.94 |
| scRNA      | HY3-L35                 | 2.20  | 0.09  | 0.74 | 0.94 |
| piRNA      | piR-61647-L4            | 3.62  | 0.06  | 0.74 | 0.94 |
| scRNA      | HY4-L135                | 18.67 | 0.03  | 0.74 | 0.94 |
| mir-3p     | hsa-miR-361-3p          | 7.04  | -0.04 | 0.75 | 0.94 |
| mir-5p     | hsa-miR-625-5p          | 2.07  | -0.07 | 0.75 | 0.94 |
| rRNA       | LSU-rRNA_Hsa-L212       | 3.25  | 0.04  | 0.75 | 0.94 |
| snoRNA     | ACA46                   | 2.21  | 0.07  | 0.75 | 0.94 |
| scRNA      | HY1-L133                | 2.77  | -0.05 | 0.75 | 0.94 |
| mir-5p3pno | hsa-miR-103b            | 8.26  | -0.04 | 0.75 | 0.94 |
| snRNA      | U1-L24                  | 2.67  | -0.06 | 0.75 | 0.94 |
| scRNA      | HY4-L129                | 3.45  | -0.04 | 0.75 | 0.94 |
| scRNA      | HY4-L154                | 1.53  | 0.08  | 0.75 | 0.94 |
| scRNA      | HY1-L356                | 4.04  | -0.04 | 0.75 | 0.94 |
| mir-5p     | hsa-miR-5010-5p         | 1.44  | 0.10  | 0.75 | 0.94 |
| tRNA       | chr19.tRNA13-ValCAC     | 4.33  | -0.05 | 0.75 | 0.94 |
| scRNA      | HY1-L121                | 2.71  | -0.07 | 0.75 | 0.94 |
| scRNA      | HY4-L17                 | 10.67 | 0.03  | 0.75 | 0.94 |
| mir-5p     | hsa-miR-550a-3-5p       | 1.55  | 0.08  | 0.75 | 0.94 |
| scRNA      | HY4-L32                 | 3.65  | -0.04 | 0.75 | 0.94 |
| rRNA       | LSU-rRNA_Hsa-L382       | 13.70 | 0.03  | 0.75 | 0.94 |
| mir-3p     | hsa-miR-10b-3p          | 1.70  | 0.11  | 0.75 | 0.94 |
| scRNA      | HY4-L20                 | 3.35  | 0.04  | 0.76 | 0.94 |
| rRNA       | LSU-rRNA_Hsa-L174       | 1.61  | 0.09  | 0.76 | 0.94 |
| scRNA      | BC200-L24               | 2.86  | 0.07  | 0.76 | 0.94 |
| scRNA      | HY4-L132                | 2.50  | 0.07  | 0.76 | 0.94 |

|        |                         |       |       |      |      |
|--------|-------------------------|-------|-------|------|------|
| rRNA   | LSU-rRNA_Hsa-L339       | 2.35  | -0.11 | 0.76 | 0.94 |
| snoRNA | ACA18                   | 2.07  | 0.07  | 0.76 | 0.94 |
| mir-5p | hsa-miR-550a-5p-L2      | 3.39  | -0.04 | 0.76 | 0.94 |
| piRNA  | piR-30890               | 3.30  | 0.06  | 0.76 | 0.94 |
| snRNA  | U5-L133                 | 2.24  | -0.06 | 0.76 | 0.94 |
| scRNA  | HY1-L69                 | 4.11  | 0.04  | 0.76 | 0.94 |
| mir-3p | hsa-miR-145-3p          | 4.84  | 0.04  | 0.76 | 0.94 |
| rRNA   | 5S-L500                 | 1.78  | 0.10  | 0.76 | 0.94 |
| tRNA   | chr12.tRNA2-SerCGA      | 1.52  | 0.15  | 0.76 | 0.94 |
| scRNA  | HY1-L269                | 1.87  | 0.06  | 0.76 | 0.94 |
| mir-3p | hsa-miR-15b-3p          | 3.61  | 0.06  | 0.77 | 0.94 |
| scRNA  | HY3-L279                | 5.21  | 0.04  | 0.77 | 0.94 |
| tRNA   | chr6.tRNA75-MetCAT      | 1.36  | -0.09 | 0.77 | 0.94 |
| scRNA  | HY4-L102                | 8.16  | 0.03  | 0.77 | 0.94 |
| snRNA  | U1-L39                  | 1.74  | -0.07 | 0.77 | 0.94 |
| mir-5p | hsa-miR-183-5p          | 7.53  | 0.03  | 0.77 | 0.94 |
| scRNA  | HY1-L321                | 4.61  | 0.04  | 0.77 | 0.94 |
| mir-5p | hsa-miR-3173-5p         | 2.41  | -0.10 | 0.77 | 0.94 |
| mir-3p | hsa-miR-570-3p          | 1.85  | -0.05 | 0.77 | 0.94 |
| scRNA  | HY4-L126                | 3.61  | 0.04  | 0.77 | 0.94 |
| scRNA  | HY1-L178                | 4.26  | 0.04  | 0.77 | 0.94 |
| rRNA   | 5S-L112                 | 10.83 | 0.03  | 0.77 | 0.94 |
| scRNA  | HY1-L78                 | 1.39  | 0.09  | 0.77 | 0.94 |
| rRNA   | LSU-rRNA_Hsa-L230       | 3.37  | 0.04  | 0.77 | 0.94 |
| mir-3p | hsa-miR-3177-3p         | 1.68  | -0.08 | 0.77 | 0.94 |
| tRF5   | chr1.tRNA90-ValCAC-tRF5 | 2.14  | 0.08  | 0.77 | 0.94 |
| rRNA   | SSU-rRNA_Hsa-L10        | 11.45 | 0.03  | 0.78 | 0.94 |
| scRNA  | HY1-L243                | 6.54  | 0.03  | 0.78 | 0.94 |
| snoRNA | ACA47                   | 3.23  | -0.06 | 0.78 | 0.94 |
| piRNA  | piR-33382-L2            | 2.24  | 0.12  | 0.78 | 0.94 |
| snoRNA | U97                     | 1.94  | -0.09 | 0.78 | 0.94 |
| mir-5p | hsa-miR-3605-5p         | 2.60  | 0.06  | 0.78 | 0.94 |
| snRNA  | U3-L75                  | 3.12  | -0.07 | 0.78 | 0.94 |
| tRNA   | chr13.tRNA5-GluTTC      | 8.98  | 0.03  | 0.78 | 0.94 |
| tRNA   | chr1.tRNA4-GlyCCC       | 5.56  | 0.04  | 0.78 | 0.94 |
| mir-3p | hsa-miR-628-3p          | 3.76  | -0.04 | 0.78 | 0.94 |
| piRNA  | piR-34535               | 5.56  | -0.05 | 0.78 | 0.94 |
| rRNA   | LSU-rRNA_Hsa-L266       | 3.17  | -0.06 | 0.78 | 0.94 |
| mir-3p | hsa-let-7f-2-3p         | 1.55  | 0.08  | 0.78 | 0.94 |
| tRNA   | chr17.tRNA20-MetCAT     | 1.87  | 0.09  | 0.78 | 0.94 |
| piRNA  | piR-53659               | 2.18  | 0.13  | 0.78 | 0.94 |
| scRNA  | HY4                     | 10.16 | 0.02  | 0.79 | 0.94 |
| mir-3p | hsa-miR-1285-3p         | 3.54  | -0.04 | 0.79 | 0.94 |

|            |                       |      |       |      |      |
|------------|-----------------------|------|-------|------|------|
| tRNA       | chr5.tRNA8-AlaTGC     | 3.15 | 0.07  | 0.79 | 0.94 |
| mir-3p     | hsa-miR-339-3p        | 2.88 | -0.05 | 0.79 | 0.94 |
| mir-5p3pno | hsa-miR-760           | 2.39 | 0.05  | 0.79 | 0.94 |
| tRNA       | chr1.tRNA54-LysTTT    | 8.24 | -0.03 | 0.79 | 0.94 |
| tRNA       | chr6.tRNA66-AlaTGC    | 1.95 | -0.06 | 0.79 | 0.94 |
| mir-5p3pno | hsa-miR-1468          | 2.31 | -0.07 | 0.79 | 0.94 |
| scRNA      | HY1-L259              | 5.48 | 0.03  | 0.79 | 0.94 |
| piRNA      | piR-43995-L4          | 6.52 | 0.03  | 0.79 | 0.94 |
| scRNA      | HY1-L167              | 2.48 | -0.06 | 0.79 | 0.94 |
| scRNA      | HY4-L98               | 9.97 | 0.02  | 0.79 | 0.94 |
| mir-5p     | hsa-miR-3184-5p       | 7.99 | -0.02 | 0.79 | 0.94 |
| piRNA      | piR-41209-L2          | 3.73 | 0.05  | 0.79 | 0.94 |
| mir-5p     | hsa-miR-342-5p        | 6.55 | -0.03 | 0.80 | 0.95 |
| mir-3p     | hsa-miR-181a-2-3p     | 4.18 | -0.04 | 0.80 | 0.95 |
| rRNA       | 5S-L367               | 1.91 | -0.05 | 0.80 | 0.95 |
| snRNA      | U5-L67                | 7.03 | 0.03  | 0.80 | 0.95 |
| tRNA       | chr1.tRNA134-GluTTC   | 7.45 | 0.02  | 0.80 | 0.95 |
| tRNA       | chr16.tRNA34-GlyCCC   | 4.00 | 0.04  | 0.80 | 0.95 |
| mir-5p     | hsa-miR-129-5p-L2     | 1.82 | -0.05 | 0.80 | 0.95 |
| piRNA      | piR-39361             | 2.73 | 0.04  | 0.80 | 0.95 |
| rRNA       | LSU-rRNA_Hsa-L251     | 7.46 | -0.03 | 0.80 | 0.95 |
| tRNA       | chr6.tRNA85-PseudoTTC | 4.59 | -0.04 | 0.80 | 0.95 |
| scRNA      | HY1-L277              | 3.60 | 0.04  | 0.80 | 0.95 |
| mir-5p3pno | hsa-miR-2110          | 5.17 | -0.02 | 0.80 | 0.95 |
| scRNA      | HY4-L87               | 9.96 | 0.02  | 0.81 | 0.95 |
| scRNA      | HY4-L109              | 2.11 | 0.05  | 0.81 | 0.95 |
| mir-3p     | hsa-miR-150-3p        | 2.88 | 0.06  | 0.81 | 0.95 |
| scRNA      | HY3-L45               | 3.48 | -0.05 | 0.81 | 0.95 |
| mir-3p     | hsa-miR-501-3p        | 4.83 | 0.03  | 0.81 | 0.95 |
| rRNA       | LSU-rRNA_Hsa-L151     | 3.13 | 0.05  | 0.81 | 0.95 |
| piRNA      | piR-36323-L3          | 2.88 | -0.06 | 0.81 | 0.95 |
| scRNA      | HY1-L103              | 2.46 | -0.05 | 0.81 | 0.95 |
| mir-5p     | hsa-miR-15a-5p        | 3.78 | -0.03 | 0.81 | 0.95 |
| rRNA       | 5S-L1262              | 1.38 | -0.09 | 0.81 | 0.95 |
| mir-5p     | hsa-miR-3074-5p       | 9.31 | 0.03  | 0.81 | 0.95 |
| piRNA      | piR-36412             | 2.36 | 0.05  | 0.81 | 0.95 |
| tRNA       | chr1.tRNA64-GluTTC    | 7.89 | -0.02 | 0.82 | 0.95 |
| tRNA       | chr3.tRNA10-PseudoCTC | 7.60 | 0.02  | 0.82 | 0.95 |
| rRNA       | LSU-rRNA_Hsa-L346     | 1.67 | 0.05  | 0.82 | 0.95 |
| scRNA      | HY4-L97               | 8.74 | 0.02  | 0.82 | 0.95 |
| mir-5p3pno | hsa-miR-95            | 2.72 | 0.04  | 0.82 | 0.95 |
| scRNA      | HY3-L479              | 2.10 | 0.07  | 0.82 | 0.95 |
| mir-3p     | hsa-miR-502-3p        | 2.26 | -0.05 | 0.82 | 0.95 |



|            |                         |       |       |      |      |
|------------|-------------------------|-------|-------|------|------|
| scRNA      | HY4-L70                 | 9.07  | 0.02  | 0.82 | 0.95 |
| rRNA       | LSU-rRNA_Hsa-L188       | 1.83  | -0.06 | 0.82 | 0.95 |
| scRNA      | HY3-L62                 | 1.84  | -0.08 | 0.82 | 0.95 |
| scRNA      | HY4-L107                | 9.96  | 0.02  | 0.82 | 0.95 |
| rRNA       | LSU-rRNA_Hsa-L4         | 8.09  | -0.03 | 0.82 | 0.95 |
| rRNA       | LSU-rRNA_Hsa-L236       | 1.43  | 0.07  | 0.82 | 0.95 |
| tRNA       | chr16.tRNA25-GlyGCC     | 4.78  | -0.03 | 0.82 | 0.95 |
| rRNA       | LSU-rRNA_Hsa-L278       | 2.72  | 0.04  | 0.83 | 0.95 |
| mir-3p     | hsa-miR-4732-3p         | 2.44  | -0.07 | 0.83 | 0.95 |
| scRNA      | HY1-L174                | 1.36  | -0.05 | 0.83 | 0.95 |
| scRNA      | BC200-L101              | 1.85  | 0.07  | 0.83 | 0.95 |
| snoRNA     | HBII-85-10              | 1.77  | 0.05  | 0.83 | 0.95 |
| snoRNA     | U99                     | 3.13  | -0.04 | 0.83 | 0.95 |
| mir-3p     | hsa-miR-542-3p          | 3.59  | -0.04 | 0.83 | 0.95 |
| mir-3p     | hsa-miR-539-3p          | 1.61  | -0.06 | 0.83 | 0.95 |
| scRNA      | HY4-L10                 | 10.20 | 0.02  | 0.83 | 0.95 |
| piRNA      | piR-33468               | 1.61  | 0.06  | 0.83 | 0.95 |
| mir-5p     | hsa-miR-548ay-5p        | 2.18  | -0.06 | 0.83 | 0.95 |
| mir-3p     | hsa-miR-499b-3p         | 3.25  | 0.04  | 0.83 | 0.95 |
| mir-5p     | hsa-miR-369-5p          | 1.73  | 0.10  | 0.83 | 0.95 |
| piRNA      | piR-61648-L7            | 4.08  | 0.03  | 0.83 | 0.95 |
| mir-5p3pno | hsa-miR-320e            | 1.85  | 0.04  | 0.84 | 0.95 |
| snRNA      | U7-L212                 | 2.30  | 0.08  | 0.84 | 0.95 |
| mir-5p     | hsa-miR-139-5p          | 6.03  | 0.02  | 0.84 | 0.95 |
| mir-3p     | hsa-miR-3605-3p         | 2.12  | -0.05 | 0.84 | 0.96 |
| scRNA      | HY1-L430                | 1.34  | -0.07 | 0.84 | 0.96 |
| snoRNA     | U105                    | 2.35  | -0.05 | 0.85 | 0.96 |
| snRNA      | U4-L41                  | 2.29  | -0.05 | 0.85 | 0.96 |
| snoRNA     | U43                     | 4.95  | -0.03 | 0.85 | 0.96 |
| tRNA       | chr6.tRNA84-GlnTTG      | 1.52  | 0.05  | 0.85 | 0.96 |
| mir-3p     | hsa-miR-576-3p          | 4.04  | -0.02 | 0.85 | 0.96 |
| tRF3       | chr6.tRNA37-ValAAC-tRF3 | 12.93 | -0.03 | 0.86 | 0.96 |
| mir-5p     | hsa-miR-4665-5p         | 1.60  | 0.05  | 0.86 | 0.96 |
| scRNA      | HY4-L146                | 1.61  | 0.04  | 0.86 | 0.96 |
| scRNA      | HY4-L52                 | 2.37  | -0.03 | 0.86 | 0.96 |
| piRNA      | piR-34804               | 4.98  | -0.03 | 0.86 | 0.96 |
| mir-5p     | hsa-miR-9-5p-L3         | 3.09  | 0.04  | 0.86 | 0.96 |
| snoRNA     | U59A                    | 6.70  | -0.04 | 0.86 | 0.96 |
| mir-5p     | hsa-miR-99b-5p          | 6.89  | 0.02  | 0.86 | 0.96 |
| scRNA      | HY1-L352                | 1.78  | -0.04 | 0.86 | 0.96 |
| snoRNA     | U93                     | 1.72  | -0.06 | 0.86 | 0.96 |
| snRNA      | U5-L2                   | 6.33  | 0.02  | 0.86 | 0.96 |
| scRNA      | BC200-L88               | 1.65  | -0.05 | 0.86 | 0.97 |

|            |                          |       |       |      |      |
|------------|--------------------------|-------|-------|------|------|
| tRNA       | chr6.tRNA36-ArgACG       | 1.39  | -0.05 | 0.86 | 0.97 |
| piRNA      | piR-44984-L3             | 2.62  | -0.03 | 0.86 | 0.97 |
| tRNA       | chr6.tRNA37-ValAAC       | 9.05  | 0.03  | 0.87 | 0.97 |
| mir-3p     | hsa-miR-142-3p           | 5.68  | -0.02 | 0.87 | 0.97 |
| rRNA       | 5S-L1144                 | 1.38  | -0.03 | 0.87 | 0.97 |
| snoRNA     | U83B                     | 2.68  | -0.03 | 0.87 | 0.97 |
| mir-5p     | hsa-miR-22-5p            | 3.80  | -0.03 | 0.87 | 0.97 |
| rRNA       | 5S-L1164                 | 2.08  | 0.03  | 0.87 | 0.97 |
| scRNA      | BC200-L23                | 3.06  | 0.03  | 0.87 | 0.97 |
| rRNA       | 5S-L107                  | 10.07 | 0.02  | 0.87 | 0.97 |
| tRNA       | chr1.tRNA88-PseudoCCT    | 6.19  | -0.02 | 0.88 | 0.97 |
| tRNA       | chr17.tRNA41-SerCGA      | 2.38  | 0.04  | 0.88 | 0.97 |
| scRNA      | BC200-L154               | 1.41  | 0.04  | 0.88 | 0.97 |
| tRNA       | chr6.tRNA147-SerAGA      | 8.22  | -0.03 | 0.88 | 0.98 |
| tRF3       | chr16.tRNA11-ProAGG-tRF3 | 1.79  | -0.03 | 0.88 | 0.98 |
| tRNA       | chr17.tRNA31-AsnGTT      | 2.61  | -0.03 | 0.88 | 0.98 |
| scRNA      | HY4-L18                  | 1.43  | -0.04 | 0.89 | 0.98 |
| mir-3p     | hsa-miR-4742-3p          | 1.43  | 0.06  | 0.89 | 0.98 |
| scRNA      | HY4-L6                   | 3.98  | 0.02  | 0.89 | 0.98 |
| scRNA      | HY4-L159                 | 4.46  | -0.02 | 0.89 | 0.98 |
| tRNA       | chr1.tRNA39-GlyGCC       | 11.35 | -0.02 | 0.89 | 0.98 |
| tRNA       | chr5.tRNA6-ValCAC        | 10.69 | -0.02 | 0.89 | 0.98 |
| scRNA      | HY3-L190                 | 2.20  | -0.03 | 0.89 | 0.98 |
| tRNA       | chr12.tRNA4-AspGTC       | 4.64  | -0.03 | 0.89 | 0.98 |
| piRNA      | piR-35952-L5             | 2.44  | -0.03 | 0.89 | 0.98 |
| mir-5p3pno | hsa-miR-4447             | 1.30  | -0.03 | 0.89 | 0.98 |
| scRNA      | BC200-L67                | 4.19  | 0.02  | 0.89 | 0.98 |
| rRNA       | LSU-rRNA_Hsa-L31         | 7.70  | 0.02  | 0.89 | 0.98 |
| snoRNA     | U22                      | 3.81  | -0.04 | 0.89 | 0.98 |
| snRNA      | U7-L52                   | 6.85  | -0.02 | 0.90 | 0.98 |
| scRNA      | HY4-L114                 | 2.44  | 0.03  | 0.90 | 0.98 |
| scRNA      | BC200-L27                | 2.96  | -0.03 | 0.90 | 0.98 |
| mir-5p3pno | hsa-miR-484              | 6.24  | -0.02 | 0.90 | 0.98 |
| piRNA      | piR-49145                | 2.41  | -0.03 | 0.90 | 0.98 |
| snoRNA     | ACA66                    | 2.24  | 0.03  | 0.90 | 0.98 |
| tRNA       | chr6.tRNA105-AlaAGC      | 1.66  | 0.05  | 0.90 | 0.98 |
| mir-5p     | hsa-miR-27a-5p           | 4.98  | -0.02 | 0.90 | 0.98 |
| mir-5p3pno | hsa-miR-215              | 3.83  | -0.02 | 0.90 | 0.98 |
| tRNA       | chr1.tRNA81-AspGTC       | 4.35  | -0.02 | 0.90 | 0.98 |
| piRNA      | piR-60565-L4             | 12.26 | 0.02  | 0.90 | 0.98 |
| scRNA      | HY4-L147                 | 9.21  | 0.01  | 0.90 | 0.98 |
| rRNA       | LSU-rRNA_Hsa-L43         | 1.53  | 0.02  | 0.90 | 0.98 |
| piRNA      | piR-31038                | 9.22  | 0.02  | 0.90 | 0.98 |

|            |                         |       |       |      |      |
|------------|-------------------------|-------|-------|------|------|
| piRNA      | piR-36041               | 7.32  | 0.01  | 0.90 | 0.98 |
| mir-5p     | hsa-miR-30a-5p          | 7.14  | -0.01 | 0.90 | 0.98 |
| tRNA       | chr8.tRNA5-TyrGTA       | 1.91  | 0.04  | 0.91 | 0.98 |
| rRNA       | 5S-L1255                | 1.70  | 0.03  | 0.91 | 0.98 |
| scRNA      | HY1-L263                | 2.72  | -0.02 | 0.91 | 0.98 |
| mir-5p     | hsa-miR-660-5p          | 3.50  | -0.02 | 0.91 | 0.98 |
| scRNA      | HY1-L106                | 1.92  | -0.07 | 0.91 | 0.98 |
| rRNA       | LSU-rRNA_Hsa-L308       | 1.76  | -0.03 | 0.91 | 0.98 |
| piRNA      | piR-36707               | 5.03  | 0.02  | 0.91 | 0.98 |
| rRNA       | LSU-rRNA_Hsa-L53        | 2.22  | -0.01 | 0.92 | 0.99 |
| scRNA      | BC200-L73               | 2.27  | 0.03  | 0.92 | 0.99 |
| tRNA       | chr17.tRNA10-GlyTCC     | 1.81  | -0.03 | 0.92 | 0.99 |
| tRNA       | chr6.tRNA78-LeuAAG      | 2.00  | 0.04  | 0.92 | 0.99 |
| scRNA      | HY4-L127                | 11.00 | 0.01  | 0.92 | 0.99 |
| rRNA       | 5S-L1152                | 1.59  | 0.03  | 0.92 | 0.99 |
| mir-5p3pno | hsa-miR-3615            | 7.34  | -0.01 | 0.92 | 0.99 |
| rRNA       | LSU-rRNA_Hsa-L283       | 2.11  | -0.01 | 0.92 | 0.99 |
| snRNA      | U13_-L44                | 1.56  | -0.02 | 0.92 | 0.99 |
| rRNA       | 5S-L983                 | 1.77  | -0.02 | 0.92 | 0.99 |
| mir-5p     | hsa-let-7b-5p           | 12.45 | 0.01  | 0.93 | 0.99 |
| piRNA      | piR-36170               | 2.57  | -0.01 | 0.93 | 0.99 |
| scRNA      | HY4-L28                 | 6.48  | -0.01 | 0.93 | 0.99 |
| rRNA       | LSU-rRNA_Hsa-L166       | 5.43  | 0.03  | 0.93 | 0.99 |
| tRNA       | chr2.tRNA25-PseudoCTC   | 8.69  | -0.01 | 0.93 | 0.99 |
| mir-5p     | hsa-miR-642b-5p         | 1.56  | -0.03 | 0.93 | 0.99 |
| mir-3p     | hsa-miR-22-3p           | 10.18 | 0.01  | 0.93 | 0.99 |
| rRNA       | 5S-L731                 | 1.51  | 0.02  | 0.93 | 0.99 |
| mir-5p3pno | hsa-miR-5096            | 2.21  | 0.04  | 0.93 | 0.99 |
| piRNA      | piR-34536               | 5.56  | 0.01  | 0.94 | 0.99 |
| mir-5p3pno | hsa-miR-320a            | 11.48 | -0.01 | 0.94 | 0.99 |
| rRNA       | 5S-L986                 | 1.69  | -0.02 | 0.94 | 0.99 |
| snRNA      | U2-L709                 | 3.25  | 0.02  | 0.94 | 0.99 |
| tRF3       | chr10.tRNA2-SerTGA-tRF3 | 2.00  | -0.01 | 0.94 | 0.99 |
| scRNA      | HY3-L518                | 8.30  | 0.01  | 0.94 | 0.99 |
| mir-5p3pno | hsa-miR-328             | 4.07  | -0.01 | 0.94 | 0.99 |
| scRNA      | HY4-L43                 | 2.22  | 0.01  | 0.94 | 0.99 |
| mir-5p     | hsa-miR-4746-5p         | 1.73  | -0.02 | 0.94 | 1.00 |
| mir-3p     | hsa-miR-378a-3p         | 8.57  | 0.01  | 0.94 | 1.00 |
| scRNA      | BC200-L149              | 1.76  | -0.02 | 0.95 | 1.00 |
| scRNA      | BC200-L147              | 2.25  | 0.02  | 0.95 | 1.00 |
| snRNA      | U2-L205                 | 1.72  | -0.01 | 0.95 | 1.00 |
| piRNA      | piR-43325-L2            | 2.34  | -0.01 | 0.95 | 1.00 |
| mir-5p     | hsa-miR-30c-5p          | 6.46  | -0.01 | 0.95 | 1.00 |

|            |                         |       |       |      |      |
|------------|-------------------------|-------|-------|------|------|
| mir-5p     | hsa-miR-148b-5p         | 2.87  | 0.01  | 0.95 | 1.00 |
| tRF3       | chr1.tRNA55-LysTTT-tRF3 | 2.49  | 0.02  | 0.95 | 1.00 |
| scRNA      | HY3-L282                | 3.75  | -0.01 | 0.95 | 1.00 |
| tRNA       | chr6.tRNA87-GluCTC      | 15.82 | -0.01 | 0.95 | 1.00 |
| mir-3p     | hsa-miR-425-3p          | 4.14  | -0.01 | 0.95 | 1.00 |
| rRNA       | 5S-L1270                | 1.27  | -0.02 | 0.95 | 1.00 |
| mir-3p     | hsa-miR-486-3p          | 10.93 | -0.01 | 0.95 | 1.00 |
| piRNA      | piR-61465               | 3.75  | 0.01  | 0.95 | 1.00 |
| snoRNA     | HBII-85-8               | 2.22  | 0.00  | 0.95 | 1.00 |
| mir-3p     | hsa-miR-335-3p          | 3.66  | -0.01 | 0.95 | 1.00 |
| piRNA      | piR-36376               | 2.64  | -0.01 | 0.96 | 1.00 |
| tRNA       | chr16.tRNA17-LeuCAG     | 3.37  | -0.01 | 0.96 | 1.00 |
| tRNA       | chr12.tRNA6-TrpCCA      | 2.86  | -0.01 | 0.96 | 1.00 |
| rRNA       | 5S-L1070                | 1.47  | 0.03  | 0.96 | 1.00 |
| tRNA       | chr19.tRNA2-GlyTCC      | 4.14  | 0.01  | 0.96 | 1.00 |
| mir-5p     | hsa-miR-99a-5p          | 7.41  | -0.01 | 0.96 | 1.00 |
| tRNA       | chr6.tRNA133-ValCAC     | 2.93  | 0.01  | 0.96 | 1.00 |
| mir-5p3pno | hsa-miR-1287            | 1.87  | -0.02 | 0.96 | 1.00 |
| mir-5p     | hsa-miR-193a-5p         | 5.17  | 0.01  | 0.96 | 1.00 |
| piRNA      | piR-36074               | 4.27  | -0.01 | 0.96 | 1.00 |
| mir-5p3pno | hsa-miR-320d-L2         | 3.63  | -0.01 | 0.96 | 1.00 |
| mir-5p     | hsa-let-7e-5p           | 5.52  | -0.01 | 0.96 | 1.00 |
| scRNA      | HY4-L11                 | 1.48  | -0.01 | 0.96 | 1.00 |
| scRNA      | HY4-L136                | 2.51  | 0.01  | 0.97 | 1.00 |
| rRNA       | LSU-rRNA_Hsa-L381       | 2.74  | 0.01  | 0.97 | 1.00 |
| scRNA      | HY1-L393                | 1.73  | 0.01  | 0.97 | 1.00 |
| mir-5p3pno | hsa-miR-494             | 1.75  | -0.01 | 0.97 | 1.00 |
| tRNA       | chr20.tRNA3-PseudoCAC   | 1.30  | -0.01 | 0.97 | 1.00 |
| rRNA       | LSU-rRNA_Hsa-L124       | 2.33  | 0.01  | 0.97 | 1.00 |
| scRNA      | HY4-L39                 | 3.89  | 0.00  | 0.97 | 1.00 |
| scRNA      | BC200-L159              | 1.51  | 0.02  | 0.97 | 1.00 |
| tRNA       | chr16.tRNA33-PseudoAGG  | 3.64  | 0.01  | 0.97 | 1.00 |
| mir-5p     | hsa-miR-505-5p          | 1.81  | 0.01  | 0.98 | 1.00 |
| mir-5p     | hsa-miR-199b-5p         | 2.97  | -0.01 | 0.98 | 1.00 |
| piRNA      | piR-62011               | 8.25  | 0.00  | 0.98 | 1.00 |
| mir-5p     | hsa-miR-423-5p          | 3.96  | 0.00  | 0.98 | 1.00 |
| scRNA      | HY3-L105                | 3.97  | 0.00  | 0.98 | 1.00 |
| scRNA      | HY4-L54                 | 6.72  | 0.00  | 0.98 | 1.00 |
| mir-5p     | hsa-miR-192-5p          | 8.24  | 0.00  | 0.98 | 1.00 |
| mir-5p     | hsa-let-7a-5p-L3        | 12.09 | 0.00  | 0.98 | 1.00 |
| scRNA      | HY3-L142                | 1.70  | 0.01  | 0.98 | 1.00 |
| piRNA      | piR-33065               | 4.52  | 0.00  | 0.98 | 1.00 |
| scRNA      | HY4-L162                | 1.65  | 0.00  | 0.98 | 1.00 |

|            |                          |       |       |      |      |
|------------|--------------------------|-------|-------|------|------|
| scRNA      | HY4-L12                  | 5.27  | 0.00  | 0.98 | 1.00 |
| snRNA      | U1-L138                  | 3.38  | -0.01 | 0.98 | 1.00 |
| scRNA      | BC200-L12                | 1.72  | -0.01 | 0.98 | 1.00 |
| tRNA       | chr6.tRNA166-AlaAGC      | 1.77  | -0.01 | 0.98 | 1.00 |
| piRNA      | piR-32678                | 6.09  | 0.00  | 0.98 | 1.00 |
| scRNA      | HY4-L15                  | 7.92  | 0.00  | 0.99 | 1.00 |
| scRNA      | HY3-L497                 | 2.14  | 0.01  | 0.99 | 1.00 |
| scRNA      | BC200-L8                 | 2.74  | 0.00  | 0.99 | 1.00 |
| tRF3       | chr14.tRNA10-IleAAT-tRF3 | 2.47  | 0.02  | 0.99 | 1.00 |
| mir-5p3pno | hsa-miR-1908             | 3.10  | 0.00  | 0.99 | 1.00 |
| snRNA      | U1-L45                   | 6.78  | 0.00  | 0.99 | 1.00 |
| mir-3p     | hsa-miR-125b-2-3p        | 1.53  | -0.01 | 0.99 | 1.00 |
| scRNA      | BC200-L126               | 3.33  | 0.00  | 0.99 | 1.00 |
| snoRNA     | U8-L17                   | 2.67  | 0.00  | 0.99 | 1.00 |
| scRNA      | BC200-L166               | 2.95  | 0.00  | 0.99 | 1.00 |
| scRNA      | HY1-L300                 | 2.19  | 0.00  | 0.99 | 1.00 |
| mir-3p     | hsa-miR-200b-3p          | 1.87  | -0.01 | 0.99 | 1.00 |
| snoRNA     | ACA36B                   | 3.84  | 0.00  | 0.99 | 1.00 |
| rRNA       | LSU-rRNA_Hsa-L139        | 14.15 | 0.00  | 0.99 | 1.00 |
| mir-3p     | hsa-miR-146b-3p          | 2.42  | 0.00  | 0.99 | 1.00 |
| piRNA      | piR-36741-L2             | 1.62  | 0.00  | 0.99 | 1.00 |
| tRNA       | chr16.tRNA2-ArgCCT       | 3.09  | 0.00  | 0.99 | 1.00 |
| mir-5p     | hsa-miR-424-5p           | 2.86  | 0.00  | 0.99 | 1.00 |
| snRNA      | U1-L174                  | 1.76  | 0.00  | 0.99 | 1.00 |
| piRNA      | piR-31115-L2             | 6.67  | 0.00  | 0.99 | 1.00 |
| tRNA       | chr2.tRNA2-TyrGTA        | 1.69  | 0.00  | 1.00 | 1.00 |
| snRNA      | U4-L40                   | 2.99  | 0.00  | 1.00 | 1.00 |
| scRNA      | HY3-L177                 | 1.55  | 0.01  | 1.00 | 1.00 |
| scRNA      | BC200-L7                 | 2.61  | 0.00  | 1.00 | 1.00 |
| mir-3p     | hsa-miR-126-3p           | 11.12 | 0.00  | 1.00 | 1.00 |

**Supplementary Table 4: Results of differential expression analysis (ACPA+ vs ACPA-)**

| <i>RNA type</i> | <i>ID</i>              | <i>Log2 fold change (ACPA+ vs. ACPA-)</i> | <i>Average read count (log2 CPM)</i> | <i>Likelihood ratio</i> | <i>Unadjusted P-value</i> | <i>Adjusted P-value</i> |
|-----------------|------------------------|-------------------------------------------|--------------------------------------|-------------------------|---------------------------|-------------------------|
| tRNA            | chr1.tRNA131-GlyCCC    | -2.26                                     | 7.00                                 | 17.21                   | 3.34E-05                  | 4.97E-02                |
| tRNA            | chr6.tRNA38-IleAAT     | -2.65                                     | 3.15                                 | 11.52                   | 6.90E-04                  | 0.50                    |
| piRNA           | piR-31068-L3           | -1.37                                     | 3.10                                 | 10.34                   | 1.30E-03                  | 0.50                    |
| rRNA            | 5S-L583                | 2.37                                      | 2.70                                 | 9.84                    | 1.71E-03                  | 0.50                    |
| tRNA            | chr1.tRNA137-Pseudo??? | -1.28                                     | 6.03                                 | 9.77                    | 1.78E-03                  | 0.50                    |
| tRNA            | chr1.tRNA128-LysCTT    | -1.19                                     | 3.26                                 | 9.32                    | 2.27E-03                  | 0.50                    |
| rRNA            | LSU-rRNA_Hsa-L63       | 2.76                                      | 5.00                                 | 8.69                    | 3.20E-03                  | 0.50                    |
| tRNA            | chr13.tRNA3-GluTTC     | -0.68                                     | 10.17                                | 8.44                    | 3.67E-03                  | 0.50                    |
| tRNA            | chr15.tRNA4-ArgTCG     | -1.67                                     | 2.57                                 | 8.38                    | 3.80E-03                  | 0.50                    |
| tRNA            | chr1.tRNA96-PseudoCCT  | -0.88                                     | 8.16                                 | 8.35                    | 3.85E-03                  | 0.50                    |
| scRNA           | HY4-L50                | 1.73                                      | 1.52                                 | 8.31                    | 3.94E-03                  | 0.50                    |
| snoRNA          | U8-L17                 | 1.58                                      | 2.69                                 | 7.98                    | 4.72E-03                  | 0.50                    |
| piRNA           | piR-35982              | -1.05                                     | 15.55                                | 7.93                    | 4.86E-03                  | 0.50                    |
| piRNA           | piR-36741              | -0.93                                     | 6.42                                 | 7.89                    | 4.98E-03                  | 0.50                    |
| mir-5p          | hsa-miR-20b-5p         | 1.15                                      | 3.40                                 | 7.52                    | 6.09E-03                  | 0.50                    |
| piRNA           | piR-31638-L3           | -0.95                                     | 7.02                                 | 7.30                    | 6.91E-03                  | 0.50                    |
| snRNA           | U3-L4                  | -1.55                                     | 1.54                                 | 7.28                    | 6.97E-03                  | 0.50                    |
| mir-5p          | hsa-miR-548ay-5p       | 1.59                                      | 2.09                                 | 7.27                    | 7.02E-03                  | 0.50                    |
| rRNA            | LSU-rRNA_Hsa-L124      | 1.23                                      | 2.32                                 | 7.06                    | 7.87E-03                  | 0.50                    |
| tRNA            | chr2.tRNA13-AlaCGC     | -0.81                                     | 6.48                                 | 7.05                    | 7.91E-03                  | 0.50                    |
| scRNA           | BC200-L69              | 1.85                                      | 1.43                                 | 7.04                    | 7.95E-03                  | 0.50                    |
| tRNA            | chr1.tRNA99-ValCAC     | -0.78                                     | 8.49                                 | 7.02                    | 8.04E-03                  | 0.50                    |
| rRNA            | LSU-rRNA_Hsa-L323      | 1.06                                      | 8.22                                 | 6.93                    | 8.48E-03                  | 0.50                    |
| snRNA           | U7-L207                | -2.18                                     | 2.15                                 | 6.91                    | 8.57E-03                  | 0.50                    |
| tRNA            | chr17.tRNA13-GlyCCC    | -0.89                                     | 5.76                                 | 6.90                    | 8.63E-03                  | 0.50                    |
| tRNA            | chr2.tRNA22-PseudoTTG  | -1.11                                     | 3.01                                 | 6.83                    | 8.95E-03                  | 0.50                    |
| tRNA            | chr6.tRNA82-GlyGCC     | -0.96                                     | 5.21                                 | 6.65                    | 9.94E-03                  | 0.50                    |
| rRNA            | LSU-rRNA_Hsa-L31       | 1.02                                      | 7.72                                 | 6.61                    | 1.02E-02                  | 0.50                    |
| snoRNA          | HBII-251               | -1.55                                     | 3.83                                 | 6.59                    | 1.02E-02                  | 0.50                    |
| scRNA           | HY1-L430               | -1.46                                     | 1.34                                 | 6.51                    | 1.07E-02                  | 0.50                    |
| scRNA           | HY1-L304               | 0.96                                      | 3.87                                 | 6.50                    | 1.08E-02                  | 0.50                    |
| piRNA           | piR-35284              | -0.94                                     | 8.03                                 | 6.49                    | 1.09E-02                  | 0.50                    |
| tRNA            | chr11.tRNA13-PheGAA    | -1.29                                     | 3.58                                 | 6.45                    | 1.11E-02                  | 0.50                    |
| scRNA           | HY1-L212               | 1.10                                      | 2.70                                 | 6.41                    | 1.14E-02                  | 0.50                    |
| tRNA            | chr1.tRNA43-GlyGCC     | -0.79                                     | 6.82                                 | 6.32                    | 1.19E-02                  | 0.51                    |
| rRNA            | 5S-L282                | 1.64                                      | 1.46                                 | 6.17                    | 1.30E-02                  | 0.53                    |
| mir-5p3pno      | hsa-miR-210            | 1.44                                      | 2.16                                 | 6.14                    | 1.32E-02                  | 0.53                    |
| piRNA           | piR-36499              | 1.43                                      | 1.68                                 | 6.08                    | 1.37E-02                  | 0.53                    |

|            |                            |       |       |      |          |      |
|------------|----------------------------|-------|-------|------|----------|------|
| rRNA       | 5S-L612                    | 1.18  | 2.88  | 5.96 | 1.47E-02 | 0.53 |
| tRNA       | chr13.tRNA5-GluTTC         | -0.57 | 8.98  | 5.90 | 1.52E-02 | 0.53 |
| scRNA      | HY4-L110                   | -1.57 | 2.00  | 5.88 | 1.53E-02 | 0.53 |
| rRNA       | LSU-rRNA_Hsa-L297          | 1.57  | 1.89  | 5.88 | 1.53E-02 | 0.53 |
| snRNA      | U1-L142                    | -1.13 | 4.25  | 5.87 | 1.54E-02 | 0.53 |
| rRNA       | LSU-rRNA_Hsa-L350          | 0.59  | 10.48 | 5.80 | 1.61E-02 | 0.54 |
| piRNA      | piR-31925                  | -0.68 | 11.17 | 5.70 | 1.69E-02 | 0.54 |
| tRNA       | chr6.tRNA157-ValCAC        | -1.39 | 1.38  | 5.69 | 1.71E-02 | 0.54 |
| scRNA      | HY4-L3                     | -0.85 | 2.39  | 5.68 | 1.72E-02 | 0.54 |
| rRNA       | SSU-rRNA_Hsa-L34           | 0.70  | 5.53  | 5.63 | 1.76E-02 | 0.54 |
| piRNA      | piR-31925-L9               | -0.66 | 13.78 | 5.63 | 1.77E-02 | 0.54 |
| snoRNA     | ACA34                      | -1.11 | 4.17  | 5.54 | 1.86E-02 | 0.55 |
| tRNA       | chr2.tRNA17-PseudoTTC      | -0.70 | 7.03  | 5.50 | 1.90E-02 | 0.55 |
| scRNA      | HY3-L479                   | -1.43 | 2.06  | 5.46 | 1.94E-02 | 0.56 |
| scRNA      | HY1-L261                   | 1.52  | 1.74  | 5.43 | 1.98E-02 | 0.56 |
| tRNA       | chr6.tRNA6-ArgACG          | 1.22  | 2.65  | 5.38 | 2.03E-02 | 0.56 |
| rRNA       | LSU-rRNA_Hsa-L58           | 0.68  | 7.03  | 5.35 | 2.07E-02 | 0.56 |
| snoRNA     | U106                       | -1.38 | 1.87  | 5.33 | 2.09E-02 | 0.56 |
| piRNA      | piR-60565-L4               | -0.61 | 12.25 | 5.30 | 2.13E-02 | 0.56 |
| tRNA       | chr6.tRNA105-AlaAGC        | -1.64 | 1.66  | 5.21 | 2.24E-02 | 0.56 |
| scRNA      | BC200-L38                  | 2.06  | 1.59  | 5.18 | 2.28E-02 | 0.56 |
| tRNA       | chr1.tRNA88-PseudoCCT      | -0.70 | 6.14  | 5.12 | 2.37E-02 | 0.56 |
| piRNA      | piR-36041                  | -0.59 | 7.32  | 5.06 | 2.45E-02 | 0.56 |
| tRNA       | chr6.tRNA4-ArgTCG          | -1.40 | 2.81  | 5.04 | 2.48E-02 | 0.56 |
| snoRNA     | U27                        | 1.09  | 4.93  | 5.03 | 2.48E-02 | 0.56 |
| tRNA       | chr12.tRNA6-TrpCCA         | 0.93  | 2.87  | 5.03 | 2.50E-02 | 0.56 |
| piRNA      | piR-61648-L7               | 0.78  | 4.08  | 5.01 | 2.53E-02 | 0.56 |
| mir-5p3pno | hsa-miR-1908               | 1.16  | 3.06  | 5.00 | 2.53E-02 | 0.56 |
| rRNA       | SSU-rRNA_Hsa-L16           | 0.81  | 6.79  | 4.98 | 2.56E-02 | 0.56 |
| rRNA       | LSU-rRNA_Hsa-L93           | 0.63  | 7.68  | 4.98 | 2.57E-02 | 0.56 |
| tRNA       | chr16.tRNA24-GlyGCC        | -0.59 | 15.80 | 4.95 | 2.61E-02 | 0.56 |
| piRNA      | piR-38354                  | 1.13  | 2.15  | 4.88 | 2.72E-02 | 0.57 |
| piRNA      | piR-47305                  | -0.65 | 9.66  | 4.86 | 2.74E-02 | 0.57 |
| tRNA       | chr6.tRNA130-GlnTTG        | 0.96  | 3.34  | 4.85 | 2.77E-02 | 0.57 |
| scRNA      | HY3-L492                   | 1.38  | 1.43  | 4.83 | 2.80E-02 | 0.57 |
| rRNA       | LSU-rRNA_Hsa-L13           | 0.49  | 12.05 | 4.76 | 2.91E-02 | 0.58 |
| tRNA       | chr2.tRNA3-AlaAGC          | -1.03 | 3.57  | 4.75 | 2.93E-02 | 0.58 |
| tRNA       | chr22.tRNA1-SeCTCA         | 1.02  | 2.22  | 4.67 | 3.08E-02 | 0.60 |
| mir-5p     | hsa-miR-1234-5p            | 0.69  | 14.76 | 4.66 | 3.09E-02 | 0.60 |
| rRNA       | 5S-L530                    | 1.24  | 5.20  | 4.53 | 3.33E-02 | 0.62 |
| tRF3       | chr3.tRNA10-PseudoCTC-tRF3 | 1.99  | 1.52  | 4.51 | 3.36E-02 | 0.62 |
| tRNA       | chr17.tRNA10-GlyTCC        | -1.12 | 1.82  | 4.51 | 3.36E-02 | 0.62 |
| mir-5p     | hsa-miR-3614-5p            | 1.38  | 1.92  | 4.50 | 3.39E-02 | 0.62 |

|            |                            |       |       |      |          |      |
|------------|----------------------------|-------|-------|------|----------|------|
| rRNA       | LSU-rRNA_Hsa-L67           | 1.29  | 3.19  | 4.47 | 3.45E-02 | 0.63 |
| tRNA       | chr6.tRNA30-ProCGG         | -0.57 | 10.89 | 4.45 | 3.50E-02 | 0.63 |
| tRNA       | chr6.tRNA37-ValAAC         | -0.66 | 9.02  | 4.41 | 3.57E-02 | 0.63 |
| piRNA      | piR-31986                  | -0.76 | 8.39  | 4.38 | 3.64E-02 | 0.64 |
| tRF3       | chr18.tRNA1-GluCTC-tRF3    | 1.70  | 2.27  | 4.30 | 3.81E-02 | 0.66 |
| piRNA      | piR-60565-L12              | -0.60 | 10.98 | 4.27 | 3.87E-02 | 0.66 |
| tRNA       | chr11.tRNA12-ProTGG        | -0.63 | 8.17  | 4.25 | 3.92E-02 | 0.66 |
| mir-5p3pno | hsa-miR-1284               | 1.28  | 1.67  | 4.21 | 4.01E-02 | 0.67 |
| snRNA      | U3-L75                     | -1.07 | 3.10  | 4.19 | 4.07E-02 | 0.67 |
| tRF5       | chr6.tRNA56-PheGAA-tRF5    | 1.63  | 1.36  | 4.14 | 4.19E-02 | 0.68 |
| scRNA      | HY4-L36                    | 1.04  | 2.15  | 4.13 | 4.22E-02 | 0.68 |
| scRNA      | HY4-L83                    | -0.66 | 4.20  | 4.00 | 4.55E-02 | 0.72 |
| rRNA       | LSU-rRNA_Hsa-L150          | 0.69  | 3.41  | 3.98 | 4.61E-02 | 0.72 |
| snoRNA     | ACA36                      | -1.50 | 1.89  | 3.97 | 4.64E-02 | 0.72 |
| rRNA       | SSU-rRNA_Hsa-L74           | 0.69  | 6.53  | 3.96 | 4.67E-02 | 0.72 |
| tRNA       | chrX.tRNA4-ValTAC          | -0.73 | 5.20  | 3.96 | 4.67E-02 | 0.72 |
| scRNA      | HY1-L114                   | 0.74  | 3.93  | 3.93 | 4.76E-02 | 0.72 |
| rRNA       | 5S-L489                    | 2.05  | 5.21  | 3.89 | 4.87E-02 | 0.72 |
| tRF3       | chr6.tRNA153-IleAAT-tRF3   | 1.35  | 2.67  | 3.88 | 4.88E-02 | 0.72 |
| scRNA      | BC200-L32                  | 1.38  | 2.06  | 3.86 | 4.95E-02 | 0.72 |
| rRNA       | LSU-rRNA_Hsa-L18           | 0.81  | 5.98  | 3.85 | 4.96E-02 | 0.72 |
| mir-5p3pno | hsa-miR-1246               | 1.19  | 5.84  | 3.83 | 5.04E-02 | 0.73 |
| rRNA       | LSU-rRNA_Hsa-L162          | 0.94  | 2.40  | 3.79 | 5.17E-02 | 0.74 |
| scRNA      | HY1-L111                   | 1.14  | 1.95  | 3.69 | 5.48E-02 | 0.75 |
| tRNA       | chr6.tRNA88-PseudoGAA      | 0.68  | 8.10  | 3.69 | 5.49E-02 | 0.75 |
| rRNA       | SSU-rRNA_Hsa-L10           | 0.44  | 11.47 | 3.68 | 5.50E-02 | 0.75 |
| piRNA      | piR-32377                  | -0.55 | 6.91  | 3.68 | 5.50E-02 | 0.75 |
| tRNA       | chr6.tRNA168-TrpCCA        | -1.13 | 2.04  | 3.67 | 5.53E-02 | 0.75 |
| snoRNA     | U20                        | -0.87 | 6.69  | 3.67 | 5.53E-02 | 0.75 |
| tRNA       | chr6.tRNA143-LysTTT        | -0.75 | 5.56  | 3.63 | 5.67E-02 | 0.76 |
| rRNA       | SSU-rRNA_Hsa-L25           | 0.66  | 4.08  | 3.60 | 5.77E-02 | 0.77 |
| rRNA       | SSU-rRNA_Hsa-L80           | 0.65  | 6.74  | 3.56 | 5.90E-02 | 0.77 |
| snoRNA     | U93                        | 1.64  | 1.72  | 3.56 | 5.91E-02 | 0.77 |
| snRNA      | U5-L3                      | -0.92 | 2.03  | 3.52 | 6.06E-02 | 0.78 |
| tRF5       | chr20.tRNA7-PseudoCTC-tRF5 | 1.38  | 1.39  | 3.50 | 6.13E-02 | 0.78 |
| rRNA       | LSU-rRNA_Hsa-L249          | 0.56  | 7.94  | 3.50 | 6.15E-02 | 0.78 |
| tRF5       | chr19.tRNA5-LysCTT-tRF5    | 0.98  | 4.34  | 3.50 | 6.15E-02 | 0.78 |
| scRNA      | BC200-L100                 | 1.88  | 1.67  | 3.45 | 6.34E-02 | 0.79 |
| mir-3p     | hsa-miR-92b-3p             | 0.52  | 4.69  | 3.43 | 6.40E-02 | 0.79 |
| snoRNA     | HBII-316                   | -1.48 | 2.02  | 3.42 | 6.43E-02 | 0.79 |
| rRNA       | LSU-rRNA_Hsa-L198          | 0.49  | 7.76  | 3.42 | 6.46E-02 | 0.79 |
| snoRNA     | HBII-135                   | 1.03  | 5.09  | 3.39 | 6.57E-02 | 0.79 |
| rRNA       | 5S-L1070                   | 1.25  | 1.47  | 3.37 | 6.64E-02 | 0.79 |



|            |                            |       |       |      |          |      |
|------------|----------------------------|-------|-------|------|----------|------|
| piRNA      | piR-41209                  | 0.81  | 2.58  | 3.37 | 6.64E-02 | 0.79 |
| mir-5p     | hsa-miR-331-5p             | 1.41  | 1.26  | 3.34 | 6.77E-02 | 0.80 |
| tRNA       | chr16.tRNA29-ProAGG        | -0.77 | 2.97  | 3.31 | 6.88E-02 | 0.81 |
| snoRNA     | U30                        | 0.99  | 6.15  | 3.26 | 7.09E-02 | 0.81 |
| scRNA      | BC200-L129                 | 1.18  | 2.19  | 3.26 | 7.09E-02 | 0.81 |
| mir-3p     | hsa-miR-92a-3p             | 0.43  | 11.29 | 3.26 | 7.10E-02 | 0.81 |
| tRNA       | chr9.tRNA4-ArgTCT          | 1.35  | 1.64  | 3.25 | 7.13E-02 | 0.81 |
| tRNA       | chr16.tRNA32-LysCTT        | 0.98  | 2.11  | 3.23 | 7.23E-02 | 0.81 |
| mir-3p     | hsa-miR-339-3p             | 0.67  | 2.84  | 3.23 | 7.23E-02 | 0.81 |
| rRNA       | 5S-L61                     | 0.79  | 2.67  | 3.21 | 7.34E-02 | 0.81 |
| mir-5p     | hsa-miR-200c-5p            | -1.37 | 1.94  | 3.17 | 7.50E-02 | 0.81 |
| piRNA      | piR-62011                  | 0.56  | 8.26  | 3.16 | 7.56E-02 | 0.81 |
| snoRNA     | U92                        | -0.77 | 2.16  | 3.16 | 7.57E-02 | 0.81 |
| piRNA      | piR-35413-L2               | 0.90  | 1.56  | 3.15 | 7.57E-02 | 0.81 |
| mir-5p     | hsa-miR-330-5p             | 1.03  | 1.63  | 3.15 | 7.60E-02 | 0.81 |
| piRNA      | piR-43771-L6               | -0.82 | 2.90  | 3.10 | 7.83E-02 | 0.82 |
| scRNA      | HY3-L82                    | -0.62 | 3.21  | 3.08 | 7.92E-02 | 0.82 |
| piRNA      | piR-35982-L6               | -1.17 | 1.90  | 3.07 | 7.99E-02 | 0.82 |
| scRNA      | BC200-L28                  | 0.99  | 2.07  | 3.04 | 8.13E-02 | 0.82 |
| mir-5p     | hsa-miR-9-5p-L3            | 0.79  | 3.10  | 3.01 | 8.26E-02 | 0.82 |
| mir-5p     | hsa-miR-183-5p             | 0.54  | 7.53  | 3.00 | 8.32E-02 | 0.82 |
| mir-5p3pno | hsa-miR-6073               | -1.02 | 1.46  | 2.98 | 8.42E-02 | 0.82 |
| mir-3p     | hsa-miR-1273g-3p           | 0.50  | 5.85  | 2.98 | 8.44E-02 | 0.82 |
| tRNA       | chr12.tRNA10-AspGTC        | 0.74  | 4.61  | 2.98 | 8.45E-02 | 0.82 |
| rRNA       | 5S-L107                    | 0.46  | 10.09 | 2.97 | 8.47E-02 | 0.82 |
| tRNA       | chr2.tRNA11-PseudoTTG      | -0.69 | 6.74  | 2.96 | 8.52E-02 | 0.82 |
| tRF3       | chr14.tRNA14-GluTTC-tRF3   | -1.51 | 1.91  | 2.96 | 8.56E-02 | 0.82 |
| tRF5       | chr6.tRNA109-PheGAA-tRF5   | -1.12 | 2.27  | 2.95 | 8.57E-02 | 0.82 |
| piRNA      | piR-31935                  | 0.61  | 4.58  | 2.95 | 8.58E-02 | 0.82 |
| scRNA      | BC200-L91                  | 1.30  | 1.86  | 2.94 | 8.62E-02 | 0.82 |
| tRF3       | chr7.tRNA26-PseudoTTG-tRF3 | -0.88 | 2.26  | 2.92 | 8.75E-02 | 0.82 |
| rRNA       | LSU-rRNA_Hsa-L2            | -0.76 | 9.27  | 2.91 | 8.81E-02 | 0.82 |
| tRNA       | chr16.tRNA33-PseudoAGG     | -0.79 | 3.63  | 2.91 | 8.82E-02 | 0.82 |
| tRNA       | chr16.tRNA13-PseudoCTT     | 0.77  | 4.45  | 2.90 | 8.88E-02 | 0.82 |
| rRNA       | LSU-rRNA_Hsa-L275          | 0.68  | 5.55  | 2.88 | 8.95E-02 | 0.82 |
| scRNA      | BC200-L154                 | 1.14  | 1.41  | 2.86 | 9.08E-02 | 0.82 |
| snRNA      | U1-L43                     | 0.86  | 1.93  | 2.85 | 9.12E-02 | 0.82 |
| rRNA       | LSU-rRNA_Hsa-L295          | 0.65  | 3.47  | 2.85 | 9.15E-02 | 0.82 |
| mir-5p     | hsa-miR-193b-5p            | -0.95 | 2.05  | 2.83 | 9.26E-02 | 0.82 |
| rRNA       | LSU-rRNA_Hsa-L251          | 0.49  | 7.46  | 2.82 | 9.31E-02 | 0.82 |
| rRNA       | LSU-rRNA_Hsa-L345          | 0.92  | 2.82  | 2.82 | 9.31E-02 | 0.82 |
| piRNA      | piR-31068-L10              | -1.17 | 2.10  | 2.82 | 9.32E-02 | 0.82 |
| mir-3p     | hsa-miR-4677-3p            | -0.86 | 1.77  | 2.81 | 9.39E-02 | 0.82 |

|            |                            |       |       |      |          |      |
|------------|----------------------------|-------|-------|------|----------|------|
| scRNA      | HY1-L393                   | -0.85 | 1.74  | 2.79 | 9.46E-02 | 0.82 |
| scRNA      | BC200-L165                 | 1.14  | 1.54  | 2.77 | 0.10     | 0.82 |
| rRNA       | 5S-L803                    | 0.41  | 7.76  | 2.76 | 0.10     | 0.82 |
| snRNA      | U5-L2                      | 0.49  | 6.35  | 2.75 | 0.10     | 0.82 |
| tRNA       | chr6.tRNA84-GlnTTG         | 1.23  | 1.50  | 2.75 | 0.10     | 0.82 |
| tRNA       | chr6.tRNA11-IleAAT         | -0.77 | 8.33  | 2.75 | 0.10     | 0.82 |
| mir-3p     | hsa-miR-450a-3p            | 1.22  | 1.54  | 2.75 | 0.10     | 0.82 |
| mir-5p     | hsa-miR-181a-5p-L2         | -0.36 | 8.53  | 2.74 | 0.10     | 0.82 |
| snRNA      | U2-L166                    | 1.44  | 3.47  | 2.74 | 0.10     | 0.82 |
| rRNA       | 5S-L253                    | 0.57  | 3.18  | 2.73 | 0.10     | 0.82 |
| snRNA      | U3-L18                     | -0.76 | 6.03  | 2.72 | 0.10     | 0.82 |
| piRNA      | piR-33082-L2               | 0.94  | 1.79  | 2.72 | 0.10     | 0.82 |
| rRNA       | LSU-rRNA_Hsa-L39           | 0.52  | 7.57  | 2.72 | 0.10     | 0.82 |
| scRNA      | HY4-L96                    | -0.52 | 3.67  | 2.71 | 0.10     | 0.82 |
| mir-5p3pno | hsa-miR-3909               | 1.15  | 1.70  | 2.70 | 0.10     | 0.82 |
| tRNA       | chr1.tRNA2-GlyCCC          | -0.55 | 5.36  | 2.66 | 0.10     | 0.82 |
| rRNA       | LSU-rRNA_Hsa-L367          | 0.39  | 7.92  | 2.65 | 0.10     | 0.82 |
| mir-5p     | hsa-miR-139-5p             | 0.44  | 6.03  | 2.65 | 0.10     | 0.82 |
| mir-3p     | hsa-miR-200b-3p            | 0.97  | 1.85  | 2.64 | 0.10     | 0.82 |
| rRNA       | SSU-rRNA_Hsa-L72           | 0.34  | 14.27 | 2.63 | 0.10     | 0.82 |
| mir-3p     | hsa-miR-19a-3p             | 0.54  | 4.15  | 2.63 | 0.10     | 0.82 |
| scRNA      | BC200-L46                  | 1.22  | 1.59  | 2.63 | 0.11     | 0.82 |
| mir-3p     | hsa-miR-26b-3p             | 0.99  | 2.30  | 2.61 | 0.11     | 0.82 |
| snoRNA     | ACA11                      | -0.95 | 2.12  | 2.60 | 0.11     | 0.82 |
| scRNA      | HY1-L356                   | 0.55  | 4.02  | 2.60 | 0.11     | 0.82 |
| mir-3p     | hsa-miR-148a-3p            | -0.44 | 13.46 | 2.59 | 0.11     | 0.82 |
| scRNA      | BC200-L164                 | 0.83  | 2.32  | 2.58 | 0.11     | 0.82 |
| piRNA      | piR-33404                  | -0.64 | 6.33  | 2.56 | 0.11     | 0.82 |
| rRNA       | LSU-rRNA_Hsa-L346          | 0.81  | 1.66  | 2.56 | 0.11     | 0.82 |
| tRNA       | chr1.tRNA39-GlyGCC         | -0.40 | 11.31 | 2.55 | 0.11     | 0.82 |
| mir-5p     | hsa-miR-144-5p             | 0.61  | 5.61  | 2.55 | 0.11     | 0.82 |
| mir-5p3pno | hsa-miR-134                | 0.66  | 6.72  | 2.53 | 0.11     | 0.82 |
| tRF3       | chr10.tRNA5-PseudoCTG-tRF3 | -0.86 | 1.69  | 2.51 | 0.11     | 0.82 |
| rRNA       | LSU-rRNA_Hsa-L84           | 0.98  | 2.85  | 2.51 | 0.11     | 0.82 |
| piRNA      | piR-60576-L6               | -0.47 | 8.03  | 2.50 | 0.11     | 0.82 |
| mir-5p     | hsa-miR-4787-5p            | 1.28  | 1.31  | 2.49 | 0.11     | 0.82 |
| mir-5p     | hsa-miR-301a-5p            | 1.03  | 1.37  | 2.48 | 0.12     | 0.82 |
| rRNA       | 5S-L357                    | 0.82  | 2.09  | 2.47 | 0.12     | 0.82 |
| mir-3p     | hsa-miR-30e-3p             | -0.34 | 8.43  | 2.47 | 0.12     | 0.82 |
| scRNA      | BC200-L96                  | -0.63 | 5.32  | 2.46 | 0.12     | 0.82 |
| mir-3p     | hsa-miR-30d-3p             | 0.95  | 1.66  | 2.46 | 0.12     | 0.82 |
| mir-5p     | hsa-miR-193a-5p            | 0.53  | 5.16  | 2.46 | 0.12     | 0.82 |
| piRNA      | piR-60565-L9               | -0.87 | 1.88  | 2.46 | 0.12     | 0.82 |

|            |                          |       |       |      |      |      |
|------------|--------------------------|-------|-------|------|------|------|
| snoRNA     | HBII-289                 | -0.53 | 7.20  | 2.44 | 0.12 | 0.82 |
| scRNA      | HY1-L106                 | 0.97  | 1.93  | 2.43 | 0.12 | 0.82 |
| scRNA      | HY1-L26                  | 0.57  | 2.97  | 2.42 | 0.12 | 0.82 |
| tRNA       | chr1.tRNA110-PseudoTTC   | -0.85 | 1.44  | 2.41 | 0.12 | 0.82 |
| snoRNA     | U36B                     | 1.41  | 1.73  | 2.41 | 0.12 | 0.82 |
| piRNA      | piR-35468                | -0.72 | 4.15  | 2.41 | 0.12 | 0.82 |
| rRNA       | 5S-L804                  | 0.46  | 4.99  | 2.38 | 0.12 | 0.82 |
| mir-5p3pno | hsa-miR-941              | -0.42 | 6.40  | 2.38 | 0.12 | 0.82 |
| scRNA      | BC200-L23                | -0.73 | 3.08  | 2.37 | 0.12 | 0.82 |
| tRNA       | chr1.tRNA18-PseudoCCT    | 1.05  | 1.64  | 2.37 | 0.12 | 0.82 |
| snRNA      | U4-L40                   | 0.73  | 3.01  | 2.36 | 0.12 | 0.82 |
| rRNA       | 5S-L1164                 | 0.71  | 2.09  | 2.36 | 0.12 | 0.82 |
| piRNA      | piR-53129                | 1.08  | 1.55  | 2.35 | 0.13 | 0.82 |
| piRNA      | piR-41209-L2             | 0.66  | 3.74  | 2.33 | 0.13 | 0.82 |
| snRNA      | U1-L38                   | -0.92 | 1.65  | 2.33 | 0.13 | 0.82 |
| scRNA      | BC200-L18                | 0.76  | 3.07  | 2.32 | 0.13 | 0.82 |
| rRNA       | 5S-L108                  | 0.36  | 11.55 | 2.32 | 0.13 | 0.82 |
| mir-5p     | hsa-miR-3606-5p          | 1.17  | 2.51  | 2.32 | 0.13 | 0.82 |
| scRNA      | HY4-L138                 | -0.35 | 8.43  | 2.31 | 0.13 | 0.82 |
| tRNA       | chr1.tRNA85-ValCAC       | 0.62  | 3.41  | 2.30 | 0.13 | 0.82 |
| snoRNA     | SNORD126                 | -0.93 | 2.75  | 2.29 | 0.13 | 0.82 |
| rRNA       | LSU-rRNA_Hsa-L403        | 0.35  | 9.96  | 2.29 | 0.13 | 0.82 |
| scRNA      | BC200-L4                 | 0.67  | 3.40  | 2.28 | 0.13 | 0.82 |
| scRNA      | HY4-L38                  | 0.53  | 4.19  | 2.28 | 0.13 | 0.82 |
| piRNA      | piR-31447                | -0.98 | 1.47  | 2.27 | 0.13 | 0.82 |
| snoRNA     | SNORD119                 | -0.69 | 5.63  | 2.26 | 0.13 | 0.82 |
| rRNA       | LSU-rRNA_Hsa-L387        | 0.35  | 9.37  | 2.26 | 0.13 | 0.82 |
| rRNA       | 5S-L95                   | 0.81  | 1.69  | 2.26 | 0.13 | 0.82 |
| rRNA       | LSU-rRNA_Hsa-L51         | -0.75 | 4.21  | 2.25 | 0.13 | 0.82 |
| rRNA       | 5S-L997                  | 1.12  | 1.98  | 2.21 | 0.14 | 0.82 |
| mir-5p     | hsa-miR-454-5p           | 0.67  | 2.33  | 2.20 | 0.14 | 0.82 |
| mir-5p3pno | hsa-miR-320d-L2          | -0.51 | 3.62  | 2.19 | 0.14 | 0.82 |
| snoRNA     | ACA9                     | 1.13  | 1.70  | 2.19 | 0.14 | 0.82 |
| mir-3p     | hsa-miR-151a-3p          | -0.42 | 11.60 | 2.19 | 0.14 | 0.82 |
| piRNA      | piR-36323-L3             | 0.79  | 2.86  | 2.18 | 0.14 | 0.82 |
| tRNA       | chr5.tRNA6-ValCAC        | -0.41 | 10.68 | 2.18 | 0.14 | 0.82 |
| mir-5p     | hsa-miR-3074-5p          | 0.38  | 9.31  | 2.16 | 0.14 | 0.82 |
| rRNA       | 5S-L1255                 | 0.75  | 1.70  | 2.16 | 0.14 | 0.82 |
| scRNA      | HY3-L34                  | 0.80  | 3.61  | 2.15 | 0.14 | 0.82 |
| piRNA      | piR-49145                | 0.74  | 2.41  | 2.15 | 0.14 | 0.82 |
| rRNA       | 5S-L105                  | 0.42  | 5.89  | 2.15 | 0.14 | 0.82 |
| tRF5       | chr16.tRNA23-LysTTT-tRF5 | 0.80  | 3.49  | 2.14 | 0.14 | 0.82 |
| rRNA       | LSU-rRNA_Hsa-L203        | 0.42  | 5.92  | 2.14 | 0.14 | 0.82 |

|            |                          |       |       |      |      |      |
|------------|--------------------------|-------|-------|------|------|------|
| tRF5       | chr1.tRNA118-HisGTG-tRF5 | 0.95  | 1.82  | 2.14 | 0.14 | 0.82 |
| mir-3p     | hsa-miR-223-3p           | -0.56 | 7.31  | 2.13 | 0.14 | 0.82 |
| mir-5p3pno | hsa-miR-4326             | 1.15  | 1.47  | 2.13 | 0.14 | 0.82 |
| mir-3p     | hsa-miR-30c-2-3p         | 1.21  | 1.38  | 2.13 | 0.14 | 0.82 |
| scRNA      | HY1-L352                 | 1.01  | 1.79  | 2.12 | 0.15 | 0.82 |
| rRNA       | LSU-rRNA_Hsa-L389        | 0.51  | 10.72 | 2.11 | 0.15 | 0.82 |
| mir-3p     | hsa-miR-21-3p            | 0.89  | 1.94  | 2.10 | 0.15 | 0.82 |
| snoRNA     | SNORD125                 | -1.08 | 1.67  | 2.10 | 0.15 | 0.82 |
| rRNA       | LSU-rRNA_Hsa-L236        | 0.93  | 1.42  | 2.10 | 0.15 | 0.82 |
| rRNA       | LSU-rRNA_Hsa-L140        | 0.63  | 4.41  | 2.10 | 0.15 | 0.82 |
| tRNA       | chr17.tRNA12-TrpCCA      | -0.69 | 2.17  | 2.10 | 0.15 | 0.82 |
| rRNA       | 5S-L356                  | 0.44  | 5.32  | 2.10 | 0.15 | 0.82 |
| mir-3p     | hsa-miR-574-3p           | 0.89  | 1.67  | 2.10 | 0.15 | 0.82 |
| tRNA       | chr6.tRNA129-MetCAT      | -0.59 | 5.36  | 2.09 | 0.15 | 0.82 |
| scRNA      | HY4-L100                 | 0.64  | 3.24  | 2.08 | 0.15 | 0.82 |
| scRNA      | BC200-L20                | 1.00  | 1.95  | 2.07 | 0.15 | 0.82 |
| piRNA      | piR-43325-L7             | -0.67 | 3.80  | 2.07 | 0.15 | 0.82 |
| scRNA      | HY4-L122                 | -0.32 | 7.83  | 2.06 | 0.15 | 0.82 |
| snRNA      | U2-L342                  | 0.78  | 5.43  | 2.06 | 0.15 | 0.82 |
| mir-3p     | hsa-miR-582-3p           | -0.64 | 4.83  | 2.06 | 0.15 | 0.82 |
| piRNA      | piR-43325-L2             | 0.90  | 2.33  | 2.04 | 0.15 | 0.82 |
| mir-3p     | hsa-miR-144-3p           | 0.48  | 5.76  | 2.04 | 0.15 | 0.82 |
| snRNA      | U17-L2                   | -0.99 | 2.12  | 2.04 | 0.15 | 0.82 |
| snoRNA     | U87                      | 1.17  | 1.64  | 2.04 | 0.15 | 0.82 |
| rRNA       | LSU-rRNA_Hsa-L189        | 0.47  | 4.25  | 2.02 | 0.16 | 0.83 |
| scRNA      | HY4-L70                  | -0.31 | 9.07  | 2.01 | 0.16 | 0.83 |
| rRNA       | LSU-rRNA_Hsa-L380        | 0.35  | 13.99 | 2.01 | 0.16 | 0.83 |
| tRNA       | chr1.tRNA4-GlyCCC        | -0.47 | 5.55  | 2.00 | 0.16 | 0.83 |
| snoRNA     | U83A                     | -0.74 | 3.55  | 2.00 | 0.16 | 0.83 |
| snoRNA     | U3-3                     | 1.04  | 2.22  | 1.98 | 0.16 | 0.84 |
| rRNA       | 5S-L1234                 | 0.44  | 5.12  | 1.97 | 0.16 | 0.84 |
| tRNA       | chr16.tRNA18-GlyGCC      | 0.82  | 1.77  | 1.97 | 0.16 | 0.84 |
| mir-3p     | hsa-miR-29c-3p           | 0.85  | 2.00  | 1.95 | 0.16 | 0.84 |
| tRF5       | chr8.tRNA12-TyrGTA-tRF5  | 1.02  | 2.20  | 1.95 | 0.16 | 0.84 |
| rRNA       | 5S-L1196                 | 1.01  | 2.23  | 1.93 | 0.16 | 0.84 |
| tRF3       | chr9.tRNA6-AspGTC-tRF3   | 0.91  | 1.45  | 1.93 | 0.16 | 0.84 |
| rRNA       | LSU-rRNA_Hsa-L348        | 0.88  | 1.89  | 1.93 | 0.16 | 0.84 |
| snoRNA     | U44                      | 0.60  | 6.39  | 1.92 | 0.17 | 0.84 |
| mir-5p     | hsa-let-7e-5p            | 0.41  | 5.52  | 1.92 | 0.17 | 0.84 |
| scRNA      | HY3-L159                 | 0.80  | 3.20  | 1.91 | 0.17 | 0.84 |
| rRNA       | LSU-rRNA_Hsa-L202        | 0.55  | 3.81  | 1.91 | 0.17 | 0.84 |
| tRF5       | chr6.tRNA114-ArgCCG-tRF5 | 0.94  | 1.56  | 1.91 | 0.17 | 0.84 |
| mir-5p3pno | hsa-miR-4472-L2          | 0.84  | 1.79  | 1.90 | 0.17 | 0.84 |

|            |                            |       |       |      |      |      |
|------------|----------------------------|-------|-------|------|------|------|
| rRNA       | LSU-rRNA_Hsa-L309          | 0.46  | 8.19  | 1.90 | 0.17 | 0.84 |
| snRNA      | U1-L138                    | -0.72 | 3.39  | 1.89 | 0.17 | 0.84 |
| piRNA      | piR-31987                  | -0.49 | 6.36  | 1.88 | 0.17 | 0.85 |
| mir-3p     | hsa-miR-628-3p             | -0.52 | 3.75  | 1.85 | 0.17 | 0.86 |
| scRNA      | HY4-L129                   | 0.47  | 3.41  | 1.85 | 0.17 | 0.86 |
| scRNA      | BC200-L138                 | 0.53  | 4.84  | 1.85 | 0.17 | 0.86 |
| snoRNA     | U91                        | -1.04 | 2.26  | 1.84 | 0.18 | 0.86 |
| rRNA       | 5S-L303                    | 0.96  | 2.33  | 1.83 | 0.18 | 0.86 |
| scRNA      | HY3-L120                   | 0.62  | 2.36  | 1.83 | 0.18 | 0.86 |
| rRNA       | LSU-rRNA_Hsa-L64           | -0.78 | 1.50  | 1.82 | 0.18 | 0.86 |
| mir-3p     | hsa-miR-222-3p             | 0.39  | 8.32  | 1.82 | 0.18 | 0.86 |
| tRNA       | chr12.tRNA4-AspGTC         | 0.67  | 4.64  | 1.81 | 0.18 | 0.86 |
| mir-3p     | hsa-miR-142-3p             | 0.34  | 5.66  | 1.80 | 0.18 | 0.86 |
| scRNA      | BC200-L134                 | -0.88 | 1.43  | 1.79 | 0.18 | 0.86 |
| snRNA      | U5-L108                    | 1.05  | 2.09  | 1.77 | 0.18 | 0.86 |
| mir-3p     | hsa-miR-126-3p             | 0.30  | 11.11 | 1.77 | 0.18 | 0.86 |
| tRNA       | chr20.tRNA3-PseudoCAC      | -0.71 | 1.30  | 1.77 | 0.18 | 0.86 |
| mir-5p     | hsa-miR-15a-5p             | 0.41  | 3.68  | 1.77 | 0.18 | 0.86 |
| piRNA      | piR-31638                  | -0.81 | 1.74  | 1.77 | 0.18 | 0.86 |
| scRNA      | HY1-L175                   | 0.90  | 2.05  | 1.76 | 0.19 | 0.86 |
| rRNA       | LSU-rRNA_Hsa-L378          | 0.86  | 2.46  | 1.75 | 0.19 | 0.86 |
| snoRNA     | U104                       | -0.55 | 7.49  | 1.74 | 0.19 | 0.86 |
| tRNA       | chr19.tRNA2-GlyTCC         | -0.48 | 4.16  | 1.73 | 0.19 | 0.86 |
| tRNA       | chr16.tRNA27-LeuTAG        | -0.75 | 2.11  | 1.73 | 0.19 | 0.86 |
| tRF3       | chr6.tRNA37-ValAAC-tRF3    | 0.61  | 12.87 | 1.73 | 0.19 | 0.86 |
| snoRNA     | snR39B                     | 0.57  | 5.74  | 1.72 | 0.19 | 0.86 |
| rRNA       | LSU-rRNA_Hsa-L166          | 1.24  | 5.46  | 1.71 | 0.19 | 0.86 |
| mir-3p     | hsa-miR-19b-3p             | 0.50  | 4.03  | 1.71 | 0.19 | 0.86 |
| tRF3       | chr15.tRNA6-PseudoCTT-tRF3 | 0.88  | 1.98  | 1.70 | 0.19 | 0.86 |
| mir-5p     | hsa-miR-150-5p             | -0.53 | 5.07  | 1.70 | 0.19 | 0.86 |
| scRNA      | HY4-L102                   | -0.30 | 8.17  | 1.70 | 0.19 | 0.86 |
| scRNA      | HY4-L135                   | -0.29 | 18.68 | 1.70 | 0.19 | 0.86 |
| scRNA      | BC200-L126                 | 0.55  | 3.29  | 1.70 | 0.19 | 0.86 |
| mir-3p     | hsa-miR-502-3p             | 0.71  | 2.27  | 1.69 | 0.19 | 0.86 |
| snRNA      | U6-L1561                   | 1.09  | 2.06  | 1.69 | 0.19 | 0.86 |
| tRF3       | chr19.tRNA9-PseudoTTT-tRF3 | 1.02  | 1.62  | 1.68 | 0.19 | 0.86 |
| scRNA      | BC200-L155                 | -0.68 | 2.70  | 1.68 | 0.19 | 0.86 |
| mir-5p3pno | hsa-miR-1976               | 0.69  | 1.90  | 1.67 | 0.20 | 0.86 |
| mir-3p     | hsa-miR-2115-3p            | -1.12 | 1.61  | 1.67 | 0.20 | 0.86 |
| rRNA       | LSU-rRNA_Hsa-L384          | 0.30  | 14.10 | 1.66 | 0.20 | 0.86 |
| tRF5       | chr20.tRNA6-LeuAAG-tRF5    | 0.55  | 3.02  | 1.65 | 0.20 | 0.86 |
| rRNA       | LSU-rRNA_Hsa-L164          | 0.38  | 5.97  | 1.65 | 0.20 | 0.86 |
| mir-5p3pno | hsa-miR-3168               | 0.84  | 2.05  | 1.64 | 0.20 | 0.86 |

|            |                           |       |       |      |      |      |
|------------|---------------------------|-------|-------|------|------|------|
| piRNA      | piR-49144                 | -0.31 | 7.03  | 1.63 | 0.20 | 0.86 |
| snRNA      | U2-L550                   | 1.06  | 2.14  | 1.62 | 0.20 | 0.86 |
| snRNA      | U2-L479                   | 1.00  | 1.54  | 1.62 | 0.20 | 0.86 |
| scRNA      | HY4-L153                  | -0.28 | 8.63  | 1.62 | 0.20 | 0.86 |
| snRNA      | U5-L133                   | -0.65 | 2.25  | 1.62 | 0.20 | 0.86 |
| mir-5p     | hsa-miR-5010-5p           | -0.94 | 1.40  | 1.61 | 0.20 | 0.86 |
| mir-5p     | hsa-miR-148a-5p           | 0.44  | 4.17  | 1.61 | 0.20 | 0.86 |
| tRNA       | chr2.tRNA23-GlnTTG        | 0.78  | 3.07  | 1.61 | 0.20 | 0.86 |
| scRNA      | HY3-L62                   | 1.01  | 1.83  | 1.60 | 0.21 | 0.86 |
| mir-3p     | hsa-miR-29b-3p            | 0.65  | 2.23  | 1.60 | 0.21 | 0.86 |
| scRNA      | HY1-L159                  | 0.46  | 4.34  | 1.60 | 0.21 | 0.86 |
| scRNA      | HY3-L525                  | 0.77  | 1.38  | 1.59 | 0.21 | 0.86 |
| tRNA       | chr15.tRNA2-LysCTT        | 0.32  | 6.59  | 1.59 | 0.21 | 0.86 |
| scRNA      | HY4-L98                   | -0.28 | 9.98  | 1.59 | 0.21 | 0.86 |
| tRF3       | chr6.tRNA36-ArgACG-tRF3   | 0.62  | 4.41  | 1.59 | 0.21 | 0.86 |
| piRNA      | piR-32678-L3              | 0.34  | 10.99 | 1.59 | 0.21 | 0.86 |
| scRNA      | BC200-L135                | 0.73  | 2.23  | 1.59 | 0.21 | 0.86 |
| rRNA       | LSU-rRNA_Hsa-L66          | 0.82  | 1.86  | 1.59 | 0.21 | 0.86 |
| snoRNA     | ACA47                     | -0.61 | 3.24  | 1.58 | 0.21 | 0.86 |
| scRNA      | BC200-L151                | 0.68  | 2.08  | 1.58 | 0.21 | 0.86 |
| tRF5       | chrX.tRNA1-PseudoTTG-tRF5 | -0.59 | 2.78  | 1.57 | 0.21 | 0.86 |
| scRNA      | HY4-L46                   | -0.28 | 9.10  | 1.56 | 0.21 | 0.86 |
| tRNA       | chr19.tRNA8-SeCTCA        | 0.34  | 5.87  | 1.55 | 0.21 | 0.86 |
| snoRNA     | HBII-382                  | -0.92 | 2.18  | 1.55 | 0.21 | 0.86 |
| rRNA       | LSU-rRNA_Hsa-L185         | 0.75  | 2.36  | 1.55 | 0.21 | 0.86 |
| tRNA       | chr16.tRNA2-ArgCCT        | 0.55  | 3.10  | 1.54 | 0.21 | 0.86 |
| rRNA       | 5S-L935                   | 0.61  | 2.94  | 1.54 | 0.21 | 0.86 |
| tRNA       | chr6.tRNA152-ValCAC       | -0.34 | 8.48  | 1.54 | 0.21 | 0.86 |
| rRNA       | SSU-rRNA_Hsa-L30          | 0.26  | 11.14 | 1.54 | 0.21 | 0.86 |
| tRNA       | chr11.tRNA11-LysTTT       | -0.49 | 7.36  | 1.54 | 0.21 | 0.86 |
| scRNA      | BC200-L85                 | -0.76 | 1.92  | 1.53 | 0.22 | 0.86 |
| rRNA       | LSU-rRNA_Hsa-L257         | 0.62  | 4.60  | 1.52 | 0.22 | 0.86 |
| scRNA      | HY4-L160                  | -0.28 | 7.29  | 1.52 | 0.22 | 0.86 |
| tRNA       | chr6.tRNA73-ArgCCG        | 0.67  | 2.38  | 1.51 | 0.22 | 0.86 |
| mir-5p3pno | hsa-miR-4461              | -0.84 | 2.07  | 1.50 | 0.22 | 0.86 |
| snRNA      | U5-L76                    | 0.78  | 2.55  | 1.50 | 0.22 | 0.86 |
| mir-5p3pno | hsa-miR-320b              | 0.35  | 4.98  | 1.50 | 0.22 | 0.86 |
| snoRNA     | U15A                      | 0.89  | 2.10  | 1.50 | 0.22 | 0.86 |
| scRNA      | HY4-L89                   | 0.39  | 8.75  | 1.49 | 0.22 | 0.86 |
| rRNA       | 5S-L1129                  | 0.66  | 1.89  | 1.49 | 0.22 | 0.86 |
| snRNA      | U6-L503                   | 0.95  | 1.29  | 1.48 | 0.22 | 0.86 |
| rRNA       | 5S-L790                   | 0.52  | 4.11  | 1.48 | 0.22 | 0.86 |
| mir-5p     | hsa-miR-148b-5p           | 0.57  | 2.84  | 1.48 | 0.22 | 0.86 |

|            |                         |       |       |      |      |      |
|------------|-------------------------|-------|-------|------|------|------|
| snoRNA     | HBI-61                  | -0.98 | 3.50  | 1.48 | 0.22 | 0.86 |
| rRNA       | LSU-rRNA_Hsa-L208       | 0.30  | 7.17  | 1.48 | 0.22 | 0.86 |
| rRNA       | LSU-rRNA_Hsa-L41        | 1.02  | 1.50  | 1.47 | 0.23 | 0.86 |
| mir-3p     | hsa-miR-143-3p          | -0.36 | 9.68  | 1.47 | 0.23 | 0.86 |
| rRNA       | LSU-rRNA_Hsa-L188       | -0.70 | 1.78  | 1.46 | 0.23 | 0.86 |
| mir-3p     | hsa-miR-185-3p          | 0.54  | 2.96  | 1.46 | 0.23 | 0.86 |
| mir-3p     | hsa-miR-570-3p          | 0.57  | 1.86  | 1.46 | 0.23 | 0.86 |
| scRNA      | BC200-L24               | 0.66  | 2.86  | 1.46 | 0.23 | 0.86 |
| scRNA      | HY4-L57                 | 0.46  | 2.79  | 1.45 | 0.23 | 0.86 |
| tRF3       | chr10.tRNA2-SerTGA-trf3 | 0.75  | 2.01  | 1.45 | 0.23 | 0.86 |
| rRNA       | 5S-L111                 | 0.28  | 10.32 | 1.44 | 0.23 | 0.86 |
| tRNA       | chr1.tRNA60-PseudoTAA   | -0.49 | 3.74  | 1.44 | 0.23 | 0.86 |
| rRNA       | 5S-L317                 | -0.79 | 1.26  | 1.43 | 0.23 | 0.86 |
| mir-5p3pno | hsa-miR-107             | 0.71  | 1.68  | 1.43 | 0.23 | 0.86 |
| snoRNA     | U83                     | 0.67  | 2.99  | 1.43 | 0.23 | 0.86 |
| scRNA      | HY1-L13                 | 0.50  | 2.52  | 1.42 | 0.23 | 0.86 |
| mir-5p     | hsa-miR-125a-5p         | 0.46  | 4.94  | 1.42 | 0.23 | 0.86 |
| scRNA      | HY4-L87                 | -0.26 | 9.96  | 1.41 | 0.23 | 0.86 |
| snRNA      | U7-L159                 | -0.93 | 1.62  | 1.40 | 0.24 | 0.86 |
| scRNA      | HY4-L10                 | -0.26 | 10.21 | 1.39 | 0.24 | 0.86 |
| snoRNA     | U94                     | -0.71 | 3.13  | 1.39 | 0.24 | 0.86 |
| snoRNA     | E3                      | 0.52  | 2.60  | 1.39 | 0.24 | 0.86 |
| snoRNA     | U102                    | -0.44 | 7.41  | 1.38 | 0.24 | 0.86 |
| piRNA      | piR-33082               | 0.33  | 7.20  | 1.38 | 0.24 | 0.86 |
| snoRNA     | U29                     | 0.62  | 5.32  | 1.38 | 0.24 | 0.86 |
| snoRNA     | U59A                    | 0.60  | 6.68  | 1.38 | 0.24 | 0.86 |
| snRNA      | U1-L45                  | -0.46 | 6.79  | 1.38 | 0.24 | 0.86 |
| scRNA      | HY1-L269                | 0.61  | 1.88  | 1.38 | 0.24 | 0.86 |
| scRNA      | BC200-L161              | 0.86  | 1.43  | 1.38 | 0.24 | 0.86 |
| rRNA       | 5S-L101                 | 0.32  | 9.07  | 1.38 | 0.24 | 0.86 |
| scRNA      | HY4-L49                 | 0.88  | 1.22  | 1.37 | 0.24 | 0.86 |
| scRNA      | HY4-L14                 | -0.26 | 8.85  | 1.37 | 0.24 | 0.86 |
| tRNA       | chr1.tRNA54-LysTTT      | -0.35 | 8.26  | 1.37 | 0.24 | 0.86 |
| piRNA      | piR-37213               | 1.02  | 1.60  | 1.37 | 0.24 | 0.86 |
| snoRNA     | ACA58                   | -0.81 | 1.86  | 1.36 | 0.24 | 0.86 |
| mir-5p     | hsa-miR-23a-5p          | -0.57 | 1.78  | 1.36 | 0.24 | 0.86 |
| rRNA       | LSU-rRNA_Hsa-L409       | 0.39  | 4.71  | 1.36 | 0.24 | 0.86 |
| tRNA       | chr14.tRNA12-PseudoTTT  | -0.79 | 1.56  | 1.36 | 0.24 | 0.86 |
| snRNA      | U2-L218                 | 0.99  | 1.63  | 1.36 | 0.24 | 0.86 |
| scRNA      | HY4-L66                 | -0.28 | 7.15  | 1.35 | 0.24 | 0.86 |
| mir-5p     | hsa-miR-423-5p          | 0.32  | 3.96  | 1.35 | 0.24 | 0.86 |
| mir-5p     | hsa-miR-99b-5p          | 0.34  | 6.85  | 1.35 | 0.25 | 0.86 |
| mir-3p     | hsa-miR-539-3p          | 0.90  | 1.56  | 1.34 | 0.25 | 0.86 |

|            |                       |       |       |      |      |      |
|------------|-----------------------|-------|-------|------|------|------|
| scRNA      | HY4-L114              | -0.56 | 2.46  | 1.33 | 0.25 | 0.86 |
| tRNA       | chr2.tRNA6-GluTTC     | -0.33 | 4.10  | 1.33 | 0.25 | 0.86 |
| tRNA       | chr1.tRNA15-GlnCTG    | 0.47  | 2.96  | 1.33 | 0.25 | 0.86 |
| scRNA      | BC200-L43             | -0.53 | 3.26  | 1.33 | 0.25 | 0.86 |
| rRNA       | LSU-rRNA_Hsa-L308     | 0.76  | 1.75  | 1.32 | 0.25 | 0.86 |
| piRNA      | piR-36376             | 0.48  | 2.64  | 1.32 | 0.25 | 0.86 |
| mir-5p     | hsa-miR-199b-5p       | -0.59 | 2.98  | 1.32 | 0.25 | 0.86 |
| tRNA       | chr11.tRNA16-ValTAC   | -0.37 | 4.19  | 1.31 | 0.25 | 0.87 |
| snoRNA     | ACA21                 | -0.62 | 2.75  | 1.31 | 0.25 | 0.87 |
| snoRNA     | U38B                  | -0.61 | 2.97  | 1.30 | 0.25 | 0.87 |
| mir-3p     | hsa-miR-195-3p        | 0.67  | 1.92  | 1.30 | 0.26 | 0.87 |
| mir-5p     | hsa-miR-181b-5p-L2    | -0.28 | 6.03  | 1.29 | 0.26 | 0.87 |
| rRNA       | LSU-rRNA_Hsa-L53      | 0.54  | 2.22  | 1.29 | 0.26 | 0.87 |
| piRNA      | piR-58356             | -0.40 | 5.41  | 1.28 | 0.26 | 0.87 |
| scRNA      | HY1-L300              | 0.55  | 2.20  | 1.28 | 0.26 | 0.87 |
| mir-5p     | hsa-miR-145-5p        | 0.85  | 1.77  | 1.28 | 0.26 | 0.87 |
| piRNA      | piR-36412             | -0.53 | 2.26  | 1.26 | 0.26 | 0.87 |
| rRNA       | LSU-rRNA_Hsa-L375     | -0.38 | 10.11 | 1.26 | 0.26 | 0.87 |
| scRNA      | HY1-L37               | 0.32  | 6.32  | 1.26 | 0.26 | 0.87 |
| snoRNA     | U52                   | 0.62  | 2.73  | 1.25 | 0.26 | 0.87 |
| mir-5p3pno | hsa-miR-451b          | 0.48  | 2.66  | 1.25 | 0.26 | 0.87 |
| scRNA      | HY4-L17               | -0.24 | 10.67 | 1.25 | 0.26 | 0.87 |
| mir-3p     | hsa-miR-101-3p        | -0.30 | 10.48 | 1.25 | 0.26 | 0.87 |
| scRNA      | HY4-L97               | -0.25 | 8.75  | 1.24 | 0.26 | 0.87 |
| mir-3p     | hsa-miR-493-3p        | -0.54 | 3.16  | 1.24 | 0.27 | 0.87 |
| rRNA       | LSU-rRNA_Hsa-L159     | 0.43  | 2.56  | 1.24 | 0.27 | 0.87 |
| tRNA       | chr1.tRNA33-Pseudo??? | -0.42 | 3.34  | 1.23 | 0.27 | 0.87 |
| mir-5p     | hsa-miR-1304-5p       | 0.71  | 1.47  | 1.23 | 0.27 | 0.87 |
| rRNA       | 5S-L472               | 0.52  | 2.72  | 1.23 | 0.27 | 0.87 |
| tRNA       | chr12.tRNA2-SerCGA    | -1.12 | 1.52  | 1.22 | 0.27 | 0.87 |
| scRNA      | HY3-L35               | -0.69 | 2.20  | 1.22 | 0.27 | 0.87 |
| rRNA       | 5S-L829               | 0.56  | 2.65  | 1.22 | 0.27 | 0.87 |
| rRNA       | LSU-rRNA_Hsa-L48      | 0.75  | 1.62  | 1.22 | 0.27 | 0.87 |
| scRNA      | HY3-L359              | 0.81  | 1.92  | 1.22 | 0.27 | 0.87 |
| tRNA       | chr6.tRNA15-TyrGTA    | -0.46 | 5.54  | 1.22 | 0.27 | 0.87 |
| mir-5p     | hsa-miR-96-5p         | 0.69  | 2.17  | 1.22 | 0.27 | 0.87 |
| mir-5p3pno | hsa-miR-378d-L2       | 0.65  | 1.35  | 1.22 | 0.27 | 0.87 |
| mir-5p3pno | hsa-miR-598           | 0.77  | 1.75  | 1.21 | 0.27 | 0.87 |
| mir-5p     | hsa-miR-24-2-5p       | -0.38 | 4.11  | 1.21 | 0.27 | 0.87 |
| snRNA      | U2-L1074              | 0.71  | 3.35  | 1.21 | 0.27 | 0.87 |
| scRNA      | HY4-L120              | -0.24 | 9.93  | 1.20 | 0.27 | 0.87 |
| piRNA      | piR-33065             | -0.38 | 4.52  | 1.20 | 0.27 | 0.87 |
| scRNA      | HY4-L12               | -0.27 | 5.28  | 1.20 | 0.27 | 0.87 |



|            |                             |       |       |      |      |      |
|------------|-----------------------------|-------|-------|------|------|------|
| mir-3p     | hsa-miR-363-3p              | 0.31  | 7.80  | 1.19 | 0.27 | 0.87 |
| scRNA      | HY4-L109                    | 0.49  | 2.09  | 1.19 | 0.28 | 0.87 |
| piRNA      | piR-36741-L2                | -0.70 | 1.61  | 1.19 | 0.28 | 0.87 |
| rRNA       | 5S-L676                     | 0.69  | 1.34  | 1.19 | 0.28 | 0.87 |
| mir-5p     | hsa-miR-92b-5p              | -0.48 | 2.29  | 1.18 | 0.28 | 0.87 |
| snRNA      | U1-L11                      | -0.53 | 3.90  | 1.17 | 0.28 | 0.87 |
| snRNA      | U2-L388                     | 0.46  | 3.43  | 1.17 | 0.28 | 0.87 |
| piRNA      | piR-31115-L2                | 0.28  | 6.69  | 1.17 | 0.28 | 0.87 |
| scRNA      | BC200-L68                   | 0.72  | 2.31  | 1.16 | 0.28 | 0.87 |
| tRNA       | chrX.tRNA2-LeuTAA           | -0.63 | 1.38  | 1.16 | 0.28 | 0.87 |
| tRNA       | chr16.tRNA17-LeuCAG         | -0.39 | 3.38  | 1.16 | 0.28 | 0.87 |
| rRNA       | LSU-rRNA_Hsa-L385           | 0.33  | 8.77  | 1.15 | 0.28 | 0.87 |
| rRNA       | LSU-rRNA_Hsa-L144           | 0.75  | 1.62  | 1.14 | 0.29 | 0.87 |
| snoRNA     | mgh28S-2409                 | -0.67 | 3.17  | 1.14 | 0.29 | 0.87 |
| mir-3p     | hsa-miR-150-3p              | -0.56 | 2.88  | 1.14 | 0.29 | 0.87 |
| rRNA       | LSU-rRNA_Hsa-L388           | 0.24  | 10.81 | 1.14 | 0.29 | 0.87 |
| snoRNA     | U62B                        | -0.53 | 3.74  | 1.14 | 0.29 | 0.87 |
| scRNA      | HY3-L45                     | 0.47  | 3.49  | 1.13 | 0.29 | 0.87 |
| rRNA       | 5S-L194                     | 0.38  | 2.90  | 1.12 | 0.29 | 0.87 |
| mir-5p3pno | hsa-miR-128                 | 0.29  | 8.32  | 1.12 | 0.29 | 0.87 |
| mir-3p     | hsa-miR-505-3p              | 0.59  | 1.97  | 1.12 | 0.29 | 0.87 |
| mir-5p3pno | hsa-miR-942                 | 0.47  | 3.30  | 1.12 | 0.29 | 0.87 |
| tRF3       | chr17.tRNA1-Pseudo???-tRF3  | -0.52 | 2.08  | 1.12 | 0.29 | 0.87 |
| snoRNA     | HBII-82                     | 1.14  | 2.14  | 1.11 | 0.29 | 0.87 |
| mir-3p     | hsa-miR-125b-2-3p           | 0.70  | 1.34  | 1.10 | 0.29 | 0.87 |
| rRNA       | 5S-L297                     | 0.69  | 1.59  | 1.10 | 0.29 | 0.87 |
| tRF3       | chr16.tRNA28-ProtTGG-tRF3   | -0.70 | 1.98  | 1.09 | 0.30 | 0.87 |
| tRNA       | chr14.tRNA2-LeuTAG          | -0.62 | 2.24  | 1.08 | 0.30 | 0.87 |
| scRNA      | HY3-L142                    | 0.78  | 1.71  | 1.07 | 0.30 | 0.87 |
| mir-5p3pno | hsa-miR-206                 | -0.83 | 2.31  | 1.07 | 0.30 | 0.87 |
| mir-5p3pno | hsa-let-7c-L2               | -0.23 | 5.46  | 1.07 | 0.30 | 0.87 |
| piRNA      | piR-36444                   | -0.57 | 2.53  | 1.06 | 0.30 | 0.87 |
| scRNA      | HY4-L149                    | -0.52 | 1.75  | 1.06 | 0.30 | 0.87 |
| mir-3p     | hsa-miR-542-3p              | -0.49 | 3.61  | 1.06 | 0.30 | 0.87 |
| snoRNA     | HBII-82B                    | 0.73  | 2.40  | 1.05 | 0.30 | 0.87 |
| piRNA      | piR-31925-L8                | -0.33 | 7.37  | 1.05 | 0.31 | 0.87 |
| rRNA       | SSU-rRNA_Hsa-L50            | 0.46  | 4.49  | 1.05 | 0.31 | 0.87 |
| mir-5p3pno | hsa-miR-133a                | 0.83  | 1.55  | 1.05 | 0.31 | 0.87 |
| snRNA      | U2-L782                     | 0.61  | 3.00  | 1.05 | 0.31 | 0.87 |
| rRNA       | LSU-rRNA_Hsa-L266           | 0.60  | 3.18  | 1.05 | 0.31 | 0.87 |
| rRNA       | 5S-L247                     | 0.54  | 1.54  | 1.04 | 0.31 | 0.87 |
| tRF5       | chr1.tRNA104-PseudoGTT-tRF5 | 0.55  | 2.64  | 1.04 | 0.31 | 0.87 |
| mir-5p     | hsa-miR-221-5p              | -0.40 | 3.84  | 1.03 | 0.31 | 0.87 |

|        |                     |       |       |      |      |      |
|--------|---------------------|-------|-------|------|------|------|
| rRNA   | LSU-rRNA_Hsa-L283   | 0.66  | 2.09  | 1.03 | 0.31 | 0.87 |
| scRNA  | HY4-L152            | 0.33  | 7.34  | 1.03 | 0.31 | 0.87 |
| mir-3p | hsa-miR-4433-3p     | 0.48  | 2.76  | 1.03 | 0.31 | 0.87 |
| tRNA   | chr5.tRNA4-ValAAC   | 0.60  | 2.27  | 1.03 | 0.31 | 0.87 |
| scRNA  | HY4-L92             | 0.63  | 1.42  | 1.03 | 0.31 | 0.87 |
| mir-3p | hsa-miR-181a-3p     | -0.48 | 2.61  | 1.03 | 0.31 | 0.87 |
| rRNA   | LSU-rRNA_Hsa-L161   | 0.57  | 1.84  | 1.02 | 0.31 | 0.87 |
| mir-5p | hsa-miR-223-5p      | -0.31 | 8.72  | 1.02 | 0.31 | 0.87 |
| mir-3p | hsa-miR-1285-3p     | -0.41 | 3.52  | 1.02 | 0.31 | 0.87 |
| scRNA  | HY4                 | -0.22 | 10.17 | 1.02 | 0.31 | 0.87 |
| rRNA   | LSU-rRNA_Hsa-L178   | 0.59  | 3.27  | 1.02 | 0.31 | 0.87 |
| scRNA  | HY3-L382            | -0.64 | 1.28  | 1.02 | 0.31 | 0.87 |
| rRNA   | LSU-rRNA_Hsa-L193   | 0.32  | 7.17  | 1.01 | 0.31 | 0.87 |
| scRNA  | HY4-L107            | -0.22 | 9.97  | 1.01 | 0.31 | 0.87 |
| tRNA   | chr17.tRNA2-LysTTT  | -0.50 | 3.03  | 1.01 | 0.31 | 0.87 |
| mir-3p | hsa-let-7d-3p       | 0.31  | 6.60  | 1.01 | 0.31 | 0.87 |
| scRNA  | HY4-L61             | 0.29  | 5.55  | 1.01 | 0.31 | 0.87 |
| tRNA   | chr6.tRNA28-IleAAT  | -0.57 | 3.38  | 1.01 | 0.32 | 0.87 |
| piRNA  | piR-35952-L5        | -0.61 | 2.46  | 1.01 | 0.32 | 0.87 |
| rRNA   | LSU-rRNA_Hsa-L214   | 1.01  | 2.14  | 1.00 | 0.32 | 0.87 |
| scRNA  | BC200-L37           | 0.28  | 6.34  | 1.00 | 0.32 | 0.87 |
| scRNA  | HY4-L32             | -0.33 | 3.65  | 1.00 | 0.32 | 0.87 |
| piRNA  | piR-34804           | -0.37 | 5.01  | 1.00 | 0.32 | 0.87 |
| scRNA  | HY4-L44             | 0.53  | 1.59  | 1.00 | 0.32 | 0.87 |
| snoRNA | ACA36B              | -0.31 | 3.84  | 0.99 | 0.32 | 0.87 |
| scRNA  | BC200-L73           | 0.53  | 2.25  | 0.99 | 0.32 | 0.87 |
| piRNA  | piR-30112           | -0.58 | 2.67  | 0.99 | 0.32 | 0.87 |
| mir-3p | hsa-miR-3177-3p     | 0.57  | 1.68  | 0.99 | 0.32 | 0.87 |
| mir-3p | hsa-miR-15b-3p      | 0.42  | 3.49  | 0.98 | 0.32 | 0.87 |
| rRNA   | LSU-rRNA_Hsa-L220   | 0.43  | 4.42  | 0.98 | 0.32 | 0.87 |
| snoRNA | U73a                | 0.72  | 1.79  | 0.98 | 0.32 | 0.87 |
| tRNA   | chr6.tRNA172-SerTGA | -0.80 | 1.87  | 0.98 | 0.32 | 0.87 |
| mir-3p | hsa-miR-181a-2-3p   | 0.33  | 4.16  | 0.98 | 0.32 | 0.87 |
| rRNA   | 5S-L471             | 0.49  | 2.20  | 0.96 | 0.33 | 0.87 |
| scRNA  | HY1-L100            | 0.26  | 8.92  | 0.96 | 0.33 | 0.87 |
| piRNA  | piR-43772-L2        | -0.26 | 6.21  | 0.96 | 0.33 | 0.87 |
| scRNA  | HY4-L52             | 0.36  | 2.36  | 0.96 | 0.33 | 0.87 |
| tRNA   | chr6.tRNA147-SerAGA | -0.36 | 8.22  | 0.96 | 0.33 | 0.87 |
| mir-5p | hsa-let-7d-5p       | 0.25  | 8.10  | 0.96 | 0.33 | 0.87 |
| snoRNA | mgU6-47             | 0.73  | 1.73  | 0.95 | 0.33 | 0.87 |
| mir-5p | hsa-miR-584-5p      | 0.29  | 7.28  | 0.95 | 0.33 | 0.87 |
| rRNA   | SSU-rRNA_Hsa-L73    | 0.22  | 14.23 | 0.94 | 0.33 | 0.87 |
| scRNA  | BC200-L110          | 0.70  | 1.47  | 0.93 | 0.33 | 0.87 |

|            |                             |       |       |      |      |      |
|------------|-----------------------------|-------|-------|------|------|------|
| tRNA       | chr14.tRNA7-ArgACG          | 0.57  | 1.74  | 0.93 | 0.33 | 0.87 |
| snoRNA     | HBII-180C                   | 0.47  | 4.13  | 0.93 | 0.34 | 0.87 |
| rRNA       | LSU-rRNA_Hsa-L300           | -0.50 | 7.59  | 0.92 | 0.34 | 0.87 |
| rRNA       | 5S-L1262                    | 0.79  | 1.38  | 0.92 | 0.34 | 0.87 |
| rRNA       | 5S-L573                     | 0.42  | 3.02  | 0.92 | 0.34 | 0.87 |
| scRNA      | HY4-L56                     | 0.46  | 1.81  | 0.92 | 0.34 | 0.87 |
| mir-5p3pno | hsa-miR-487b                | 0.88  | 1.50  | 0.92 | 0.34 | 0.87 |
| mir-3p     | hsa-miR-23a-3p              | -0.30 | 6.61  | 0.92 | 0.34 | 0.87 |
| mir-5p3pno | hsa-miR-3615                | 0.23  | 7.34  | 0.92 | 0.34 | 0.87 |
| rRNA       | LSU-rRNA_Hsa-L382           | 0.23  | 13.71 | 0.91 | 0.34 | 0.87 |
| rRNA       | 5S-L526                     | 0.72  | 1.29  | 0.91 | 0.34 | 0.87 |
| rRNA       | SSU-rRNA_Hsa-L65            | 0.32  | 4.30  | 0.91 | 0.34 | 0.87 |
| rRNA       | LSU-rRNA_Hsa-L4             | 0.29  | 8.11  | 0.91 | 0.34 | 0.87 |
| piRNA      | piR-51810-L2                | -0.30 | 8.23  | 0.91 | 0.34 | 0.87 |
| mir-3p     | hsa-miR-374a-3p             | 0.31  | 3.79  | 0.91 | 0.34 | 0.87 |
| scRNA      | HY4-L35                     | -0.24 | 7.16  | 0.90 | 0.34 | 0.87 |
| scRNA      | HY4-L6                      | 0.27  | 3.97  | 0.90 | 0.34 | 0.87 |
| snoRNA     | HBII-202                    | 0.49  | 6.46  | 0.90 | 0.34 | 0.87 |
| tRF3       | chr12.tRNA7-AspGTC-tRF3     | -0.71 | 1.63  | 0.90 | 0.34 | 0.87 |
| tRNA       | chr17.tRNA5-GlyGCC          | -0.26 | 7.52  | 0.90 | 0.34 | 0.87 |
| rRNA       | 5S-L995                     | -1.34 | 3.48  | 0.90 | 0.34 | 0.87 |
| piRNA      | piR-43995-L4                | -0.25 | 6.51  | 0.89 | 0.34 | 0.87 |
| mir-5p     | hsa-miR-425-5p              | 0.32  | 5.11  | 0.89 | 0.35 | 0.87 |
| snRNA      | U2-L709                     | 0.49  | 3.26  | 0.88 | 0.35 | 0.87 |
| mir-3p     | hsa-miR-130a-3p             | 0.34  | 3.58  | 0.88 | 0.35 | 0.87 |
| mir-5p     | hsa-miR-1292-5p             | -0.54 | 1.69  | 0.88 | 0.35 | 0.87 |
| rRNA       | SSU-rRNA_Hsa-L46            | 0.42  | 6.10  | 0.88 | 0.35 | 0.87 |
| rRNA       | 5S-L930                     | 0.51  | 1.75  | 0.88 | 0.35 | 0.87 |
| rRNA       | LSU-rRNA_Hsa-L109           | 0.59  | 1.47  | 0.88 | 0.35 | 0.87 |
| scRNA      | BC200-L49                   | -0.36 | 4.37  | 0.88 | 0.35 | 0.87 |
| piRNA      | piR-33151-L12               | 0.34  | 2.96  | 0.88 | 0.35 | 0.87 |
| scRNA      | BC200-L159                  | 0.68  | 1.47  | 0.87 | 0.35 | 0.87 |
| snoRNA     | U79                         | 0.73  | 1.71  | 0.87 | 0.35 | 0.87 |
| mir-3p     | hsa-miR-3613-3p             | -0.67 | 1.70  | 0.87 | 0.35 | 0.87 |
| tRNA       | chr17.tRNA41-SerCGA         | 0.90  | 2.40  | 0.87 | 0.35 | 0.87 |
| tRF5       | chr1.tRNA125-PseudoGTT-tRF5 | 0.63  | 1.45  | 0.87 | 0.35 | 0.87 |
| scRNA      | HY1-L326                    | 0.68  | 1.33  | 0.87 | 0.35 | 0.87 |
| rRNA       | 5S-L1214                    | 0.57  | 1.32  | 0.86 | 0.35 | 0.87 |
| mir-3p     | hsa-miR-3187-3p             | 0.62  | 1.63  | 0.86 | 0.35 | 0.87 |
| mir-5p     | hsa-miR-338-5p              | 0.37  | 4.37  | 0.86 | 0.35 | 0.87 |
| rRNA       | 5S-L1115                    | -0.60 | 1.30  | 0.86 | 0.36 | 0.87 |
| snoRNA     | SNORD127                    | -0.53 | 4.80  | 0.85 | 0.36 | 0.87 |
| piRNA      | piR-38502                   | -0.48 | 3.32  | 0.85 | 0.36 | 0.87 |

|            |                            |       |      |      |      |      |
|------------|----------------------------|-------|------|------|------|------|
| snoRNA     | U100                       | -0.66 | 1.50 | 0.85 | 0.36 | 0.87 |
| piRNA      | piR-33151-L4               | 0.33  | 4.00 | 0.85 | 0.36 | 0.87 |
| mir-5p     | hsa-miR-340-5p             | -0.27 | 6.37 | 0.84 | 0.36 | 0.87 |
| tRNA       | chr1.tRNA64-GluTTC         | -0.21 | 7.90 | 0.84 | 0.36 | 0.87 |
| piRNA      | piR-35469                  | 0.51  | 1.70 | 0.84 | 0.36 | 0.87 |
| mir-3p     | hsa-miR-501-3p             | 0.28  | 4.79 | 0.83 | 0.36 | 0.87 |
| rRNA       | LSU-rRNA_Hsa-L42           | 0.50  | 1.88 | 0.83 | 0.36 | 0.87 |
| snRNA      | U5-L67                     | 0.33  | 7.05 | 0.83 | 0.36 | 0.87 |
| mir-3p     | hsa-miR-361-3p             | -0.24 | 7.01 | 0.83 | 0.36 | 0.87 |
| scRNA      | HY3-L105                   | -0.37 | 3.99 | 0.82 | 0.36 | 0.87 |
| rRNA       | LSU-rRNA_Hsa-L278          | -0.35 | 2.72 | 0.82 | 0.36 | 0.87 |
| rRNA       | 5S-L819                    | 0.51  | 2.02 | 0.82 | 0.36 | 0.87 |
| scRNA      | HY1-L247                   | 0.59  | 1.47 | 0.82 | 0.36 | 0.87 |
| rRNA       | LSU-rRNA_Hsa-L102          | 0.41  | 3.18 | 0.82 | 0.37 | 0.87 |
| tRF3       | chr1.tRNA55-LysTTT-tRF3    | 0.54  | 2.48 | 0.82 | 0.37 | 0.87 |
| rRNA       | LSU-rRNA_Hsa-L304          | -0.55 | 2.50 | 0.81 | 0.37 | 0.87 |
| mir-3p     | hsa-miR-139-3p             | 0.36  | 3.29 | 0.81 | 0.37 | 0.87 |
| snRNA      | U1-L17                     | -0.75 | 1.83 | 0.81 | 0.37 | 0.87 |
| snoRNA     | U66                        | -0.60 | 1.78 | 0.81 | 0.37 | 0.87 |
| mir-5p3pno | hsa-miR-328                | 0.37  | 4.05 | 0.80 | 0.37 | 0.87 |
| mir-3p     | hsa-miR-323a-3p            | 0.48  | 3.17 | 0.80 | 0.37 | 0.87 |
| mir-5p     | hsa-miR-126-5p             | 0.27  | 6.01 | 0.80 | 0.37 | 0.87 |
| piRNA      | piR-35982-L11              | -0.76 | 1.93 | 0.80 | 0.37 | 0.87 |
| tRNA       | chr16.tRNA7-LysCTT         | 0.54  | 2.24 | 0.80 | 0.37 | 0.87 |
| rRNA       | 5S-L621                    | -0.53 | 1.22 | 0.79 | 0.37 | 0.87 |
| mir-5p     | hsa-miR-629-5p             | -0.23 | 7.74 | 0.79 | 0.37 | 0.87 |
| piRNA      | piR-44984-L3               | 0.38  | 2.62 | 0.79 | 0.37 | 0.87 |
| rRNA       | 5S-L578                    | 0.48  | 2.38 | 0.79 | 0.37 | 0.87 |
| mir-5p3pno | hsa-miR-1278               | -0.65 | 1.56 | 0.79 | 0.37 | 0.87 |
| tRF5       | chr11.tRNA16-ValTAC-tRF5   | -0.60 | 1.57 | 0.79 | 0.37 | 0.87 |
| tRF5       | chr17.tRNA31-AsnGTT-tRF5   | 0.50  | 2.89 | 0.79 | 0.38 | 0.87 |
| snoRNA     | U76                        | 0.63  | 2.37 | 0.78 | 0.38 | 0.87 |
| tRNA       | chr2.tRNA25-PseudoCTC      | -0.21 | 8.69 | 0.78 | 0.38 | 0.87 |
| rRNA       | 5S-L627                    | -0.63 | 1.57 | 0.78 | 0.38 | 0.87 |
| tRNA       | chr1.tRNA38-LeuCAG         | 0.44  | 3.67 | 0.78 | 0.38 | 0.87 |
| rRNA       | 5S-L688                    | 0.36  | 4.44 | 0.78 | 0.38 | 0.87 |
| mir-5p     | hsa-miR-642b-5p            | 0.62  | 1.56 | 0.78 | 0.38 | 0.87 |
| snRNA      | U3-L205                    | -0.27 | 4.76 | 0.77 | 0.38 | 0.87 |
| tRNA       | chr6.tRNA136-ValAAC        | 0.49  | 2.03 | 0.77 | 0.38 | 0.87 |
| tRF3       | chr18.tRNA2-PseudoTCC-tRF3 | 0.47  | 3.10 | 0.77 | 0.38 | 0.87 |
| scRNA      | HY4-L136                   | -0.46 | 2.53 | 0.77 | 0.38 | 0.87 |
| scRNA      | HY1-L263                   | -0.36 | 2.73 | 0.77 | 0.38 | 0.87 |
| piRNA      | piR-44716                  | -1.79 | 4.77 | 0.76 | 0.38 | 0.87 |

|            |                          |       |       |      |      |      |
|------------|--------------------------|-------|-------|------|------|------|
| snoRNA     | HBII-99B                 | -0.70 | 1.88  | 0.76 | 0.38 | 0.87 |
| scRNA      | BC200-L149               | 0.65  | 1.72  | 0.75 | 0.39 | 0.87 |
| tRF5       | chr17.tRNA26-CysGCA-tRF5 | 0.29  | 5.40  | 0.75 | 0.39 | 0.87 |
| rRNA       | 5S-L99                   | 0.25  | 8.56  | 0.75 | 0.39 | 0.87 |
| mir-3p     | hsa-miR-3913-3p          | 0.52  | 1.59  | 0.75 | 0.39 | 0.87 |
| snRNA      | U1-L7                    | 0.26  | 6.16  | 0.75 | 0.39 | 0.87 |
| snoRNA     | U105                     | -0.54 | 2.36  | 0.75 | 0.39 | 0.87 |
| tRNA       | chr5.tRNA15-ValAAC       | -0.29 | 4.71  | 0.74 | 0.39 | 0.87 |
| piRNA      | piR-61174                | -0.56 | 1.20  | 0.74 | 0.39 | 0.87 |
| mir-3p     | hsa-miR-1306-3p          | -0.51 | 1.99  | 0.74 | 0.39 | 0.87 |
| piRNA      | piR-52416-L2             | -0.46 | 2.30  | 0.74 | 0.39 | 0.87 |
| snoRNA     | HBII-85-8                | 0.67  | 2.23  | 0.73 | 0.39 | 0.87 |
| rRNA       | LSU-rRNA_Hsa-L341        | -0.49 | 1.94  | 0.73 | 0.39 | 0.87 |
| mir-5p     | hsa-miR-155-5p           | 0.23  | 4.33  | 0.73 | 0.39 | 0.87 |
| rRNA       | 5S-L109                  | 0.22  | 9.58  | 0.73 | 0.39 | 0.87 |
| tRNA       | chr6.tRNA40-ValTAC       | -0.34 | 2.74  | 0.73 | 0.39 | 0.87 |
| snRNA      | U2-L285                  | 0.55  | 2.97  | 0.73 | 0.39 | 0.87 |
| piRNA      | piR-35411-L4             | 0.43  | 2.53  | 0.73 | 0.39 | 0.87 |
| scRNA      | HY4-L111                 | -0.19 | 9.51  | 0.72 | 0.39 | 0.87 |
| mir-5p     | hsa-miR-30e-5p           | 0.22  | 8.11  | 0.72 | 0.39 | 0.87 |
| tRNA       | chr6.tRNA31-SerGCT       | 0.63  | 3.09  | 0.72 | 0.39 | 0.87 |
| piRNA      | piR-36743                | 0.33  | 3.66  | 0.72 | 0.40 | 0.87 |
| piRNA      | piR-36707                | -0.31 | 5.05  | 0.72 | 0.40 | 0.87 |
| mir-5p     | hsa-miR-3679-5p          | -0.41 | 2.95  | 0.72 | 0.40 | 0.87 |
| tRNA       | chr5.tRNA8-AlaTGC        | -0.43 | 3.12  | 0.72 | 0.40 | 0.87 |
| rRNA       | LSU-rRNA_Hsa-L381        | -0.50 | 2.69  | 0.72 | 0.40 | 0.87 |
| scRNA      | HY1-L389                 | 0.36  | 2.67  | 0.72 | 0.40 | 0.87 |
| scRNA      | BC200-L120               | -0.47 | 1.92  | 0.71 | 0.40 | 0.87 |
| scRNA      | HY1-L324                 | 0.51  | 1.90  | 0.71 | 0.40 | 0.87 |
| rRNA       | 5S-L782                  | 0.30  | 3.63  | 0.71 | 0.40 | 0.87 |
| snoRNA     | U74                      | -0.40 | 5.81  | 0.71 | 0.40 | 0.87 |
| rRNA       | 5S-L100                  | -0.42 | 2.90  | 0.71 | 0.40 | 0.87 |
| mir-5p     | hsa-miR-2115-5p          | 0.58  | 1.24  | 0.71 | 0.40 | 0.87 |
| snoRNA     | E2                       | 0.57  | 2.15  | 0.71 | 0.40 | 0.87 |
| snRNA      | U2-L1061                 | 0.47  | 11.10 | 0.71 | 0.40 | 0.87 |
| mir-5p3pno | hsa-miR-103b-L2          | 0.34  | 3.86  | 0.70 | 0.40 | 0.87 |
| mir-5p     | hsa-miR-98-5p            | -0.24 | 6.15  | 0.70 | 0.40 | 0.87 |
| snoRNA     | ACA8                     | 0.59  | 2.22  | 0.70 | 0.40 | 0.87 |
| snoRNA     | ACA18                    | -0.50 | 2.08  | 0.70 | 0.40 | 0.87 |
| snoRNA     | HBII-180A                | 0.68  | 2.04  | 0.70 | 0.40 | 0.87 |
| tRNA       | chr1.tRNA117-GlyTCC      | 0.29  | 2.73  | 0.70 | 0.40 | 0.87 |
| scRNA      | HY1-L239                 | 0.27  | 4.37  | 0.70 | 0.40 | 0.87 |
| rRNA       | 5S-L550                  | 0.35  | 2.31  | 0.69 | 0.41 | 0.87 |

|            |                            |       |      |      |      |      |
|------------|----------------------------|-------|------|------|------|------|
| mir-5p     | hsa-miR-214-5p             | 0.56  | 1.57 | 0.69 | 0.41 | 0.87 |
| tRF5       | chr18.tRNA3-PseudoTCC-tRF5 | -0.70 | 1.32 | 0.69 | 0.41 | 0.87 |
| snoRNA     | U84                        | -0.53 | 2.11 | 0.68 | 0.41 | 0.87 |
| snRNA      | U2-L1058                   | 0.43  | 6.72 | 0.68 | 0.41 | 0.87 |
| snRNA      | U2-L825                    | -0.49 | 3.20 | 0.68 | 0.41 | 0.87 |
| tRNA       | chr2.tRNA14-TyrATA         | -0.44 | 3.29 | 0.68 | 0.41 | 0.87 |
| scRNA      | HY1-L280                   | 0.38  | 2.41 | 0.68 | 0.41 | 0.87 |
| piRNA      | piR-34536                  | -0.31 | 5.58 | 0.68 | 0.41 | 0.87 |
| snoRNA     | U61                        | 0.37  | 5.57 | 0.68 | 0.41 | 0.87 |
| scRNA      | HY4-L134                   | -0.45 | 2.49 | 0.67 | 0.41 | 0.87 |
| rRNA       | LSU-rRNA_Hsa-L19           | 0.43  | 2.09 | 0.67 | 0.41 | 0.87 |
| scRNA      | HY4-L150                   | 0.35  | 3.26 | 0.67 | 0.41 | 0.87 |
| mir-5p     | hsa-miR-450b-5p            | -0.29 | 5.23 | 0.67 | 0.41 | 0.87 |
| mir-5p3pno | hsa-miR-548j               | -0.48 | 1.81 | 0.67 | 0.41 | 0.87 |
| scRNA      | HY3-L282                   | -0.32 | 3.76 | 0.67 | 0.41 | 0.87 |
| rRNA       | 5S-L731                    | 0.42  | 1.51 | 0.67 | 0.41 | 0.87 |
| snoRNA     | U18B                       | 0.48  | 2.75 | 0.67 | 0.41 | 0.87 |
| scRNA      | HY4-L116                   | -0.27 | 3.86 | 0.67 | 0.41 | 0.87 |
| scRNA      | HY3-L208                   | -0.51 | 1.32 | 0.67 | 0.41 | 0.87 |
| mir-5p     | hsa-miR-129-5p-L2          | 0.43  | 1.75 | 0.67 | 0.41 | 0.87 |
| tRNA       | chr7.tRNA21-CysGCA         | 0.52  | 1.68 | 0.67 | 0.41 | 0.87 |
| scRNA      | HY1-L45                    | 0.47  | 1.89 | 0.67 | 0.41 | 0.87 |
| scRNA      | HY4-L99                    | 0.46  | 1.47 | 0.67 | 0.41 | 0.87 |
| tRNA       | chr17.tRNA15-CysGCA        | -0.23 | 6.13 | 0.67 | 0.41 | 0.87 |
| snoRNA     | ACA53                      | -0.49 | 3.03 | 0.66 | 0.42 | 0.87 |
| tRNA       | chr16.tRNA10-LysCTT        | -0.25 | 4.97 | 0.66 | 0.42 | 0.87 |
| scRNA      | HY4-L15                    | -0.18 | 7.93 | 0.66 | 0.42 | 0.87 |
| scRNA      | HY4-L77                    | -0.36 | 2.13 | 0.66 | 0.42 | 0.87 |
| snRNA      | U2-L405                    | 0.57  | 3.58 | 0.66 | 0.42 | 0.87 |
| tRNA       | chr16.tRNA16-LeuAAG        | 0.38  | 3.28 | 0.66 | 0.42 | 0.87 |
| snoRNA     | mgU6-77                    | -0.40 | 4.53 | 0.66 | 0.42 | 0.87 |
| snoRNA     | HBII-166                   | -0.50 | 3.07 | 0.66 | 0.42 | 0.87 |
| snoRNA     | U90                        | 0.58  | 2.77 | 0.66 | 0.42 | 0.87 |
| mir-5p     | hsa-miR-493-5p             | -0.39 | 4.57 | 0.66 | 0.42 | 0.87 |
| piRNA      | piR-36742                  | -0.25 | 5.17 | 0.65 | 0.42 | 0.87 |
| snoRNA     | U57                        | -0.38 | 4.71 | 0.65 | 0.42 | 0.87 |
| mir-5p     | hsa-miR-30c-5p             | 0.19  | 6.41 | 0.65 | 0.42 | 0.87 |
| snoRNA     | U97                        | -0.59 | 1.94 | 0.65 | 0.42 | 0.87 |
| snoRNA     | U83B                       | 0.46  | 2.69 | 0.65 | 0.42 | 0.87 |
| tRNA       | chr16.tRNA22-MetCAT        | -0.37 | 3.03 | 0.65 | 0.42 | 0.87 |
| mir-3p     | hsa-miR-374b-3p            | 0.45  | 2.45 | 0.64 | 0.42 | 0.87 |
| rRNA       | 5S-L515                    | 0.35  | 2.07 | 0.64 | 0.42 | 0.87 |
| snoRNA     | U101                       | 0.39  | 5.25 | 0.64 | 0.43 | 0.87 |

|            |                          |       |       |      |      |      |
|------------|--------------------------|-------|-------|------|------|------|
| scRNA      | HY4-L147                 | 0.18  | 9.20  | 0.64 | 0.43 | 0.87 |
| scRNA      | HY1-L178                 | 0.28  | 4.28  | 0.63 | 0.43 | 0.87 |
| rRNA       | LSU-rRNA_Hsa-L132        | -0.21 | 10.53 | 0.63 | 0.43 | 0.87 |
| snRNA      | U14-L2                   | -0.68 | 1.78  | 0.63 | 0.43 | 0.87 |
| tRF3       | chr14.tRNA10-IleAAT-tRF3 | 0.55  | 2.43  | 0.63 | 0.43 | 0.87 |
| mir-5p     | hsa-miR-342-5p           | -0.26 | 6.57  | 0.63 | 0.43 | 0.87 |
| scRNA      | HY1-L442                 | -0.47 | 1.33  | 0.62 | 0.43 | 0.87 |
| rRNA       | LSU-rRNA_Hsa-L174        | 0.48  | 1.62  | 0.62 | 0.43 | 0.87 |
| rRNA       | 5S-L103                  | -0.35 | 3.03  | 0.62 | 0.43 | 0.87 |
| mir-3p     | hsa-miR-125a-3p          | 0.44  | 3.84  | 0.62 | 0.43 | 0.87 |
| rRNA       | LSU-rRNA_Hsa-L60         | -0.23 | 12.46 | 0.62 | 0.43 | 0.87 |
| tRNA       | chr6.tRNA133-ValCAC      | -0.29 | 2.94  | 0.60 | 0.44 | 0.88 |
| mir-5p3pno | hsa-miR-103b             | 0.21  | 8.22  | 0.60 | 0.44 | 0.88 |
| scRNA      | HY4-L20                  | 0.23  | 3.34  | 0.60 | 0.44 | 0.88 |
| tRNA       | chr16.tRNA4-ProAGG       | -0.32 | 2.50  | 0.60 | 0.44 | 0.88 |
| mir-5p     | hsa-miR-335-5p           | 0.24  | 3.53  | 0.60 | 0.44 | 0.88 |
| scRNA      | HY3-L239                 | 0.45  | 1.81  | 0.60 | 0.44 | 0.88 |
| piRNA      | piR-52416                | 0.71  | 1.72  | 0.59 | 0.44 | 0.88 |
| mir-3p     | hsa-miR-99b-3p           | -0.31 | 3.51  | 0.59 | 0.44 | 0.88 |
| snoRNA     | U35A                     | 0.53  | 1.81  | 0.59 | 0.44 | 0.88 |
| scRNA      | HY1-L409                 | 0.31  | 2.73  | 0.59 | 0.44 | 0.88 |
| mir-5p     | hsa-miR-4665-5p          | -0.55 | 1.56  | 0.58 | 0.44 | 0.88 |
| snRNA      | U2-L250                  | 0.46  | 12.51 | 0.58 | 0.45 | 0.88 |
| rRNA       | 5S-L113                  | 0.20  | 10.35 | 0.58 | 0.45 | 0.88 |
| tRNA       | chr6.tRNA78-LeuAAG       | 0.55  | 1.91  | 0.58 | 0.45 | 0.88 |
| snoRNA     | U21                      | -0.39 | 4.63  | 0.58 | 0.45 | 0.88 |
| mir-5p     | hsa-miR-382-5p           | -0.29 | 5.84  | 0.58 | 0.45 | 0.88 |
| mir-5p     | hsa-miR-339-5p           | 0.57  | 1.78  | 0.58 | 0.45 | 0.88 |
| mir-5p     | hsa-miR-224-5p           | -0.25 | 6.86  | 0.57 | 0.45 | 0.88 |
| mir-3p     | hsa-miR-146b-3p          | -0.38 | 2.42  | 0.57 | 0.45 | 0.88 |
| mir-5p3pno | hsa-miR-421              | 0.31  | 2.76  | 0.57 | 0.45 | 0.89 |
| rRNA       | 5S-L1179                 | 0.50  | 1.46  | 0.57 | 0.45 | 0.89 |
| snRNA      | U2-L765                  | -0.50 | 2.05  | 0.56 | 0.45 | 0.89 |
| scRNA      | BC200-L11                | -0.51 | 1.53  | 0.56 | 0.45 | 0.89 |
| mir-5p3pno | hsa-miR-378c             | 0.23  | 5.31  | 0.56 | 0.45 | 0.89 |
| snoRNA     | HBII-420                 | -0.41 | 4.28  | 0.56 | 0.46 | 0.89 |
| snoRNA     | U96a                     | -0.40 | 3.49  | 0.55 | 0.46 | 0.89 |
| rRNA       | 5S-L97                   | 0.21  | 10.25 | 0.55 | 0.46 | 0.89 |
| rRNA       | 5S-L946                  | 0.17  | 9.08  | 0.55 | 0.46 | 0.89 |
| mir-5p     | hsa-miR-21-5p            | -0.16 | 13.56 | 0.55 | 0.46 | 0.89 |
| rRNA       | LSU-rRNA_Hsa-L298        | 0.43  | 3.43  | 0.55 | 0.46 | 0.89 |
| rRNA       | 5S-L189                  | 0.40  | 2.22  | 0.55 | 0.46 | 0.89 |
| rRNA       | LSU-rRNA_Hsa-L360        | 0.34  | 1.82  | 0.55 | 0.46 | 0.89 |

|        |                         |       |       |      |      |      |
|--------|-------------------------|-------|-------|------|------|------|
| rRNA   | LSU-rRNA_Hsa-L143       | 0.21  | 5.09  | 0.54 | 0.46 | 0.89 |
| piRNA  | piR-61647-L4            | 0.28  | 3.63  | 0.54 | 0.46 | 0.89 |
| mir-3p | hsa-let-7i-3p           | 0.42  | 1.50  | 0.54 | 0.46 | 0.89 |
| tRF5   | chr6.tRNA78-LeuAAG-tRF5 | -0.63 | 1.31  | 0.54 | 0.46 | 0.89 |
| mir-3p | hsa-miR-423-3p          | 0.16  | 8.89  | 0.54 | 0.46 | 0.89 |
| mir-5p | hsa-miR-93-5p           | 0.21  | 7.07  | 0.54 | 0.46 | 0.89 |
| scRNA  | BC200-L140              | 0.18  | 7.03  | 0.54 | 0.46 | 0.89 |
| rRNA   | 5S-L1091                | -0.41 | 1.37  | 0.54 | 0.46 | 0.89 |
| rRNA   | 5S-L255                 | 0.28  | 2.63  | 0.53 | 0.47 | 0.89 |
| piRNA  | piR-33468               | -0.46 | 1.61  | 0.53 | 0.47 | 0.89 |
| rRNA   | LSU-rRNA_Hsa-L331       | -0.50 | 1.53  | 0.53 | 0.47 | 0.89 |
| scRNA  | BC200-L156              | -0.28 | 2.59  | 0.52 | 0.47 | 0.89 |
| scRNA  | HY1-L174                | 0.45  | 1.36  | 0.52 | 0.47 | 0.89 |
| scRNA  | BC200-L12               | 0.58  | 1.73  | 0.52 | 0.47 | 0.89 |
| mir-5p | hsa-miR-532-5p          | 0.17  | 7.64  | 0.52 | 0.47 | 0.89 |
| snoRNA | U31                     | -0.28 | 7.99  | 0.51 | 0.47 | 0.90 |
| snoRNA | U59B                    | -0.33 | 7.09  | 0.51 | 0.47 | 0.90 |
| scRNA  | BC200-L139              | 0.28  | 3.24  | 0.51 | 0.48 | 0.90 |
| tRNA   | chr10.tRNA6-ValTAC      | -0.45 | 1.43  | 0.50 | 0.48 | 0.90 |
| tRNA   | chr7.tRNA3-ArgCCT       | 0.21  | 5.40  | 0.50 | 0.48 | 0.90 |
| mir-3p | hsa-miR-130b-3p         | 0.30  | 2.47  | 0.50 | 0.48 | 0.90 |
| piRNA  | piR-32950               | 0.22  | 6.32  | 0.50 | 0.48 | 0.90 |
| tRNA   | chr2.tRNA27-GlyCCC      | -0.26 | 8.81  | 0.50 | 0.48 | 0.90 |
| tRNA   | chr6.tRNA36-ArgACG      | 0.51  | 1.39  | 0.50 | 0.48 | 0.90 |
| snoRNA | U58C                    | -0.43 | 3.39  | 0.50 | 0.48 | 0.90 |
| tRNA   | chr14.tRNA8-CysGCA      | 0.62  | 4.30  | 0.49 | 0.48 | 0.90 |
| mir-5p | hsa-miR-130b-5p         | 0.32  | 4.39  | 0.49 | 0.48 | 0.90 |
| tRNA   | chr6.tRNA87-GluCTC      | -0.16 | 15.83 | 0.49 | 0.49 | 0.90 |
| scRNA  | HY3-L203                | 0.36  | 1.79  | 0.49 | 0.49 | 0.90 |
| rRNA   | 5S-L389                 | -0.44 | 1.35  | 0.48 | 0.49 | 0.90 |
| tRNA   | chr16.tRNA19-GlyGCC     | 0.54  | 1.89  | 0.48 | 0.49 | 0.90 |
| piRNA  | piR-57516               | 0.24  | 5.26  | 0.48 | 0.49 | 0.90 |
| scRNA  | BC200-L76               | -0.37 | 2.57  | 0.48 | 0.49 | 0.90 |
| tRNA   | chr13.tRNA2-PseudoCTC   | -0.19 | 4.78  | 0.48 | 0.49 | 0.90 |
| snoRNA | U49B                    | 0.57  | 1.60  | 0.48 | 0.49 | 0.90 |
| tRNA   | chr17.tRNA20-MetCAT     | 0.51  | 1.86  | 0.48 | 0.49 | 0.90 |
| mir-5p | hsa-miR-3173-5p         | 0.53  | 2.39  | 0.48 | 0.49 | 0.91 |
| mir-3p | hsa-miR-369-3p          | 0.47  | 1.36  | 0.47 | 0.49 | 0.91 |
| mir-5p | hsa-miR-17-5p           | 0.25  | 5.04  | 0.47 | 0.49 | 0.91 |
| mir-3p | hsa-miR-629-3p          | 0.49  | 1.39  | 0.47 | 0.49 | 0.91 |
| tRNA   | chr6.tRNA77-GluCTC      | 0.26  | 4.25  | 0.47 | 0.49 | 0.91 |
| scRNA  | HY4-L68                 | -0.19 | 4.03  | 0.47 | 0.49 | 0.91 |
| tRNA   | chr6.tRNA85-PseudoTTC   | -0.27 | 4.59  | 0.47 | 0.50 | 0.91 |



|            |                       |       |       |      |      |      |
|------------|-----------------------|-------|-------|------|------|------|
| snoRNA     | HBI-115               | -0.49 | 2.00  | 0.46 | 0.50 | 0.91 |
| tRNA       | chr6.tRNA98-LeuAAG    | -0.44 | 2.88  | 0.46 | 0.50 | 0.91 |
| rRNA       | LSU-rRNA_Hsa-L165     | 0.23  | 7.50  | 0.46 | 0.50 | 0.91 |
| rRNA       | LSU-rRNA_Hsa-L211     | 0.40  | 1.60  | 0.46 | 0.50 | 0.91 |
| piRNA      | piR-61298             | -0.71 | 1.91  | 0.46 | 0.50 | 0.91 |
| mir-3p     | hsa-miR-323b-3p       | 0.35  | 3.63  | 0.45 | 0.50 | 0.91 |
| mir-3p     | hsa-miR-409-3p        | 0.29  | 5.68  | 0.45 | 0.50 | 0.91 |
| tRNA       | chr14.tRNA10-IleAAT   | -0.42 | 1.39  | 0.45 | 0.50 | 0.91 |
| snoRNA     | U51                   | 0.44  | 2.73  | 0.44 | 0.51 | 0.91 |
| scRNA      | HY4-L28               | -0.17 | 6.49  | 0.44 | 0.51 | 0.91 |
| mir-5p     | hsa-miR-199a-5p       | 0.20  | 6.32  | 0.44 | 0.51 | 0.91 |
| mir-3p     | hsa-miR-3605-3p       | 0.43  | 2.09  | 0.44 | 0.51 | 0.91 |
| snoRNA     | U42B                  | -0.44 | 4.24  | 0.44 | 0.51 | 0.91 |
| mir-5p3pno | hsa-miR-1294          | -0.51 | 1.58  | 0.44 | 0.51 | 0.91 |
| rRNA       | 5S-L78                | 0.28  | 2.70  | 0.44 | 0.51 | 0.91 |
| scRNA      | HY1-L374              | 0.19  | 8.17  | 0.44 | 0.51 | 0.91 |
| mir-3p     | hsa-miR-424-3p        | 0.26  | 4.67  | 0.44 | 0.51 | 0.91 |
| rRNA       | 5S-L112               | 0.18  | 10.84 | 0.43 | 0.51 | 0.91 |
| piRNA      | piR-33382             | -0.23 | 8.70  | 0.43 | 0.51 | 0.91 |
| piRNA      | piR-31115-L4          | 0.19  | 7.29  | 0.43 | 0.51 | 0.91 |
| mir-3p     | hsa-miR-378a-3p       | -0.15 | 8.54  | 0.43 | 0.51 | 0.91 |
| rRNA       | 5S-L106               | 0.20  | 12.31 | 0.43 | 0.51 | 0.91 |
| mir-5p3pno | hsa-miR-548k          | 0.38  | 1.90  | 0.43 | 0.51 | 0.91 |
| rRNA       | 5S-L71                | 0.38  | 1.75  | 0.43 | 0.51 | 0.91 |
| mir-5p     | hsa-miR-99a-5p        | 0.25  | 7.38  | 0.43 | 0.51 | 0.91 |
| rRNA       | 5S-L115               | 0.33  | 1.96  | 0.43 | 0.51 | 0.91 |
| scRNA      | HY1-L435              | 0.21  | 3.51  | 0.43 | 0.51 | 0.91 |
| snRNA      | U2-L481               | 0.52  | 1.44  | 0.42 | 0.52 | 0.91 |
| mir-3p     | hsa-miR-340-3p        | -0.26 | 4.30  | 0.42 | 0.52 | 0.91 |
| scRNA      | BC200-L82             | 0.41  | 1.74  | 0.42 | 0.52 | 0.91 |
| snoRNA     | U48                   | 0.27  | 5.74  | 0.41 | 0.52 | 0.92 |
| mir-5p     | hsa-miR-345-5p        | -0.32 | 2.68  | 0.41 | 0.52 | 0.92 |
| scRNA      | HY1-L439              | -0.23 | 2.45  | 0.41 | 0.52 | 0.92 |
| scRNA      | HY4-L18               | 0.36  | 1.43  | 0.41 | 0.52 | 0.92 |
| mir-5p     | hsa-miR-146b-5p       | 0.17  | 7.72  | 0.41 | 0.52 | 0.92 |
| rRNA       | 5S-L990               | 0.21  | 3.09  | 0.41 | 0.52 | 0.92 |
| rRNA       | LSU-rRNA_Hsa-L247     | 0.36  | 1.51  | 0.40 | 0.52 | 0.92 |
| mir-3p     | hsa-miR-4732-3p       | 0.42  | 2.38  | 0.40 | 0.53 | 0.92 |
| scRNA      | HY1-L167              | 0.35  | 2.43  | 0.40 | 0.53 | 0.92 |
| rRNA       | 5S-L1114              | 0.33  | 1.69  | 0.40 | 0.53 | 0.92 |
| mir-5p     | hsa-miR-4746-5p       | 0.38  | 1.74  | 0.40 | 0.53 | 0.92 |
| scRNA      | HY1-L78               | -0.41 | 1.38  | 0.40 | 0.53 | 0.92 |
| tRNA       | chr6.tRNA86-PseudoTAC | -0.39 | 2.07  | 0.39 | 0.53 | 0.92 |

|            |                            |       |       |      |      |      |
|------------|----------------------------|-------|-------|------|------|------|
| scRNA      | HY1-L223                   | 0.17  | 6.18  | 0.39 | 0.53 | 0.92 |
| scRNA      | BC200-L16                  | -0.56 | 1.60  | 0.39 | 0.53 | 0.92 |
| mir-5p     | hsa-miR-1307-5p            | 0.44  | 1.42  | 0.39 | 0.53 | 0.92 |
| mir-5p3pno | hsa-miR-889                | -0.37 | 2.81  | 0.39 | 0.53 | 0.92 |
| scRNA      | HY4-L72                    | -0.15 | 7.28  | 0.39 | 0.53 | 0.92 |
| mir-5p     | hsa-miR-503-5p             | -0.26 | 3.18  | 0.39 | 0.53 | 0.92 |
| mir-5p     | hsa-miR-6723-5p            | -0.26 | 4.59  | 0.39 | 0.53 | 0.92 |
| scRNA      | HY3-L199                   | 0.31  | 1.70  | 0.39 | 0.53 | 0.92 |
| snRNA      | U2-L63                     | -0.33 | 2.16  | 0.39 | 0.53 | 0.92 |
| mir-3p     | hsa-miR-191-3p             | -0.35 | 1.89  | 0.38 | 0.54 | 0.92 |
| tRNA       | chr7.tRNA8-CysGCA          | 0.44  | 1.82  | 0.38 | 0.54 | 0.92 |
| tRNA       | chr6.tRNA138-ArgACG        | -0.42 | 1.63  | 0.38 | 0.54 | 0.92 |
| scRNA      | BC200-L146                 | -0.34 | 2.60  | 0.38 | 0.54 | 0.92 |
| rRNA       | SSU-rRNA_Hsa-L33           | 0.16  | 12.80 | 0.38 | 0.54 | 0.92 |
| scRNA      | HY3-L272                   | 0.41  | 1.38  | 0.38 | 0.54 | 0.92 |
| scRNA      | BC200-L101                 | 0.50  | 1.85  | 0.38 | 0.54 | 0.92 |
| mir-3p     | hsa-miR-411-3p             | 0.43  | 1.66  | 0.38 | 0.54 | 0.92 |
| scRNA      | HY4-L93                    | 0.19  | 3.97  | 0.37 | 0.54 | 0.92 |
| rRNA       | 5S-L558                    | 0.17  | 7.28  | 0.37 | 0.54 | 0.92 |
| snoRNA     | HBII-429                   | -0.31 | 4.23  | 0.37 | 0.54 | 0.92 |
| scRNA      | HY4-L130                   | 0.14  | 14.43 | 0.37 | 0.54 | 0.92 |
| snRNA      | U6-L1308                   | 0.35  | 2.60  | 0.37 | 0.55 | 0.92 |
| mir-5p3pno | hsa-miR-378e               | -0.36 | 1.48  | 0.37 | 0.55 | 0.92 |
| mir-5p     | hsa-miR-7-5p-L3            | 0.41  | 1.42  | 0.37 | 0.55 | 0.92 |
| piRNA      | piR-33382-L2               | 0.52  | 2.26  | 0.36 | 0.55 | 0.92 |
| snRNA      | U3-L78                     | 0.29  | 4.42  | 0.36 | 0.55 | 0.92 |
| piRNA      | piR-35548-L3               | -0.32 | 2.79  | 0.36 | 0.55 | 0.92 |
| rRNA       | 5S-L104                    | 0.16  | 10.63 | 0.36 | 0.55 | 0.92 |
| mir-3p     | hsa-miR-181c-3p            | -0.36 | 1.55  | 0.36 | 0.55 | 0.92 |
| rRNA       | 5S-L1217                   | 0.33  | 1.69  | 0.36 | 0.55 | 0.92 |
| mir-5p     | hsa-miR-3184-5p            | 0.14  | 7.98  | 0.36 | 0.55 | 0.92 |
| mir-5p     | hsa-miR-186-5p             | 0.19  | 6.19  | 0.36 | 0.55 | 0.92 |
| scRNA      | HY3-L518                   | -0.13 | 8.32  | 0.35 | 0.55 | 0.92 |
| tRF5       | chr17.tRNA33-PseudoTTG-tRF | -0.23 | 5.93  | 0.35 | 0.55 | 0.92 |
| piRNA      | piR-30890                  | 0.31  | 3.33  | 0.35 | 0.55 | 0.93 |
| tRNA       | chr6.tRNA122-PseudoTGC     | 0.38  | 2.63  | 0.35 | 0.56 | 0.93 |
| mir-3p     | hsa-miR-16-2-3p            | 0.18  | 7.90  | 0.35 | 0.56 | 0.93 |
| mir-3p     | hsa-miR-330-3p             | 0.19  | 3.79  | 0.34 | 0.56 | 0.93 |
| scRNA      | HY1-L183                   | 0.23  | 2.43  | 0.34 | 0.56 | 0.93 |
| snRNA      | U2-L302                    | -0.25 | 4.06  | 0.34 | 0.56 | 0.93 |
| scRNA      | BC200-L9                   | -0.22 | 2.83  | 0.34 | 0.56 | 0.93 |
| mir-5p     | hsa-miR-26b-5p             | 0.15  | 8.12  | 0.34 | 0.56 | 0.93 |
| snoRNA     | U45B                       | -0.36 | 2.59  | 0.34 | 0.56 | 0.93 |

|            |                         |       |       |      |      |      |
|------------|-------------------------|-------|-------|------|------|------|
| rRNA       | 5S-L98                  | 0.15  | 9.85  | 0.34 | 0.56 | 0.93 |
| mir-5p     | hsa-miR-483-5p          | 0.27  | 4.03  | 0.34 | 0.56 | 0.93 |
| tRNA       | chr14.tRNA23-ProAGG     | -0.34 | 2.14  | 0.34 | 0.56 | 0.93 |
| scRNA      | HY1-L124                | 0.30  | 1.83  | 0.34 | 0.56 | 0.93 |
| mir-5p     | hsa-miR-23b-5p          | -0.40 | 1.49  | 0.33 | 0.56 | 0.93 |
| rRNA       | LSU-rRNA_Hsa-L73        | 0.30  | 2.17  | 0.33 | 0.56 | 0.93 |
| snoRNA     | mgU2-19/30              | 0.20  | 3.69  | 0.33 | 0.56 | 0.93 |
| piRNA      | piR-33468-L4            | 0.21  | 2.35  | 0.33 | 0.56 | 0.93 |
| snoRNA     | U33                     | -0.23 | 4.26  | 0.33 | 0.56 | 0.93 |
| mir-5p3pno | hsa-miR-760             | -0.24 | 2.39  | 0.33 | 0.57 | 0.93 |
| rRNA       | LSU-rRNA_Hsa-L333       | 0.22  | 4.06  | 0.33 | 0.57 | 0.93 |
| snoRNA     | U26                     | -0.23 | 8.59  | 0.33 | 0.57 | 0.93 |
| mir-3p     | hsa-let-7b-3p           | 0.15  | 3.86  | 0.32 | 0.57 | 0.93 |
| tRNA       | chr6.tRNA153-IleAAT     | 0.41  | 1.63  | 0.32 | 0.57 | 0.93 |
| mir-5p     | hsa-let-7a-5p-L3        | 0.12  | 12.08 | 0.32 | 0.57 | 0.93 |
| tRNA       | chr17.tRNA14-ThrCGT     | -0.36 | 1.88  | 0.32 | 0.57 | 0.93 |
| mir-5p     | hsa-miR-151a-5p         | -0.19 | 6.39  | 0.32 | 0.57 | 0.93 |
| mir-5p     | hsa-miR-30a-5p          | 0.14  | 7.08  | 0.32 | 0.57 | 0.93 |
| rRNA       | 5S-L762                 | 0.17  | 4.86  | 0.31 | 0.57 | 0.93 |
| mir-5p     | hsa-miR-132-5p          | -0.34 | 2.51  | 0.31 | 0.58 | 0.93 |
| mir-3p     | hsa-miR-342-3p          | -0.23 | 3.59  | 0.31 | 0.58 | 0.93 |
| tRF3       | chr6.tRNA61-MetCAT-tRF3 | 0.48  | 2.24  | 0.31 | 0.58 | 0.93 |
| mir-5p3pno | hsa-miR-1180            | 0.20  | 4.03  | 0.31 | 0.58 | 0.93 |
| snoRNA     | HBII-276                | 0.31  | 3.51  | 0.31 | 0.58 | 0.93 |
| mir-3p     | hsa-miR-381-3p          | -0.26 | 4.37  | 0.31 | 0.58 | 0.93 |
| snRNA      | U4-L41                  | -0.35 | 2.29  | 0.31 | 0.58 | 0.93 |
| mir-5p     | hsa-miR-625-5p          | -0.32 | 2.04  | 0.31 | 0.58 | 0.93 |
| mir-3p     | hsa-let-7f-1-3p         | -0.40 | 1.54  | 0.30 | 0.58 | 0.93 |
| rRNA       | LSU-rRNA_Hsa-L305       | 0.21  | 5.27  | 0.30 | 0.58 | 0.93 |
| rRNA       | 5S-L602                 | 0.21  | 5.13  | 0.30 | 0.58 | 0.93 |
| scRNA      | HY1-L184                | 0.18  | 3.78  | 0.30 | 0.58 | 0.93 |
| mir-5p     | hsa-miR-122-5p          | -0.25 | 9.87  | 0.30 | 0.58 | 0.93 |
| scRNA      | HY1-L28                 | 0.33  | 1.52  | 0.30 | 0.58 | 0.93 |
| rRNA       | LSU-rRNA_Hsa-L29        | -0.21 | 2.55  | 0.30 | 0.58 | 0.93 |
| mir-5p3pno | hsa-miR-378f            | 0.25  | 1.70  | 0.30 | 0.58 | 0.93 |
| mir-5p3pno | hsa-miR-1287            | 0.39  | 1.87  | 0.30 | 0.58 | 0.93 |
| scRNA      | HY3-L524                | 0.36  | 1.56  | 0.30 | 0.58 | 0.93 |
| piRNA      | piR-33151-L9            | 0.21  | 3.43  | 0.30 | 0.59 | 0.93 |
| snoRNA     | mgh28S-2411             | -0.23 | 6.59  | 0.30 | 0.59 | 0.93 |
| mir-5p     | hsa-miR-27a-5p          | 0.19  | 5.00  | 0.30 | 0.59 | 0.93 |
| rRNA       | 5S-L957                 | -0.33 | 1.43  | 0.30 | 0.59 | 0.93 |
| scRNA      | HY4-L103                | 0.21  | 4.42  | 0.29 | 0.59 | 0.93 |
| scRNA      | BC200-L88               | -0.30 | 1.62  | 0.29 | 0.59 | 0.93 |

|            |                          |       |       |      |      |      |
|------------|--------------------------|-------|-------|------|------|------|
| snRNA      | U1-L71                   | -0.19 | 5.07  | 0.29 | 0.59 | 0.93 |
| snoRNA     | ACA54                    | 0.31  | 1.60  | 0.29 | 0.59 | 0.93 |
| mir-5p     | hsa-miR-22-5p            | 0.21  | 3.80  | 0.29 | 0.59 | 0.93 |
| rRNA       | LSU-rRNA_Hsa-L130        | -0.33 | 4.62  | 0.29 | 0.59 | 0.93 |
| tRF5       | chr3.tRNA5-LeuAAG-tRF5   | 0.18  | 3.60  | 0.28 | 0.59 | 0.93 |
| mir-5p3pno | hsa-miR-378g             | -0.25 | 2.00  | 0.28 | 0.60 | 0.94 |
| mir-5p     | hsa-miR-191-5p           | -0.12 | 8.87  | 0.28 | 0.60 | 0.94 |
| tRF3       | chr2.tRNA21-SerTGA-tRF3  | 0.31  | 2.35  | 0.28 | 0.60 | 0.94 |
| snoRNA     | ACA16                    | 0.28  | 2.82  | 0.28 | 0.60 | 0.94 |
| mir-3p     | hsa-miR-145-3p           | 0.16  | 4.80  | 0.28 | 0.60 | 0.94 |
| rRNA       | 5S-L746                  | 0.32  | 2.20  | 0.27 | 0.60 | 0.94 |
| snRNA      | U13_-L44                 | -0.37 | 1.52  | 0.27 | 0.60 | 0.94 |
| snoRNA     | U13-L162                 | -0.29 | 2.04  | 0.27 | 0.60 | 0.94 |
| tRNA       | chr17.tRNA23-ArgCCG      | 0.21  | 3.40  | 0.27 | 0.60 | 0.94 |
| mir-3p     | hsa-miR-221-3p           | 0.16  | 7.13  | 0.27 | 0.60 | 0.94 |
| piRNA      | piR-34535                | -0.22 | 5.56  | 0.27 | 0.61 | 0.94 |
| mir-5p     | hsa-let-7a-5p            | 0.36  | 2.03  | 0.26 | 0.61 | 0.94 |
| rRNA       | 5S-L986                  | 0.28  | 1.68  | 0.26 | 0.61 | 0.94 |
| snoRNA     | ACA7                     | 0.37  | 2.30  | 0.26 | 0.61 | 0.94 |
| scRNA      | HY1-L137                 | 0.18  | 4.45  | 0.26 | 0.61 | 0.94 |
| mir-5p3pno | hsa-miR-375              | 0.19  | 5.93  | 0.26 | 0.61 | 0.94 |
| rRNA       | 5S-L1071                 | 0.27  | 1.51  | 0.26 | 0.61 | 0.94 |
| mir-3p     | hsa-miR-24-3p            | 0.14  | 8.46  | 0.26 | 0.61 | 0.94 |
| snoRNA     | HBII-85-15               | -0.41 | 1.65  | 0.26 | 0.61 | 0.94 |
| tRF3       | chr17.tRNA13-GlyCCC-tRF3 | -0.18 | 5.22  | 0.25 | 0.61 | 0.94 |
| scRNA      | HY1-L191                 | 0.18  | 3.52  | 0.25 | 0.61 | 0.94 |
| scRNA      | HY1-L391                 | 0.13  | 14.90 | 0.25 | 0.62 | 0.94 |
| snRNA      | U3-L74                   | 0.33  | 2.44  | 0.25 | 0.62 | 0.94 |
| tRNA       | chr1.tRNA52-ProCGG       | 0.26  | 2.12  | 0.25 | 0.62 | 0.94 |
| mir-3p     | hsa-miR-1185-1-3p        | 0.35  | 2.18  | 0.25 | 0.62 | 0.94 |
| snoRNA     | U3-4                     | -0.20 | 7.33  | 0.25 | 0.62 | 0.94 |
| mir-5p     | hsa-let-7i-5p            | 0.11  | 12.16 | 0.25 | 0.62 | 0.94 |
| mir-3p     | hsa-miR-106b-3p          | 0.14  | 7.63  | 0.25 | 0.62 | 0.94 |
| scRNA      | BC200-L108               | 0.28  | 2.00  | 0.25 | 0.62 | 0.94 |
| snRNA      | U2-L75                   | 0.34  | 4.90  | 0.25 | 0.62 | 0.94 |
| scRNA      | BC200-L62                | -0.21 | 2.70  | 0.24 | 0.62 | 0.94 |
| snoRNA     | U99                      | -0.27 | 3.15  | 0.24 | 0.62 | 0.94 |
| mir-3p     | hsa-miR-140-3p           | -0.13 | 9.00  | 0.24 | 0.62 | 0.94 |
| scRNA      | BC200-L72                | 0.40  | 1.56  | 0.24 | 0.62 | 0.94 |
| scRNA      | HY4-L159                 | -0.14 | 4.46  | 0.24 | 0.62 | 0.94 |
| mir-3p     | hsa-miR-548o-3p-L2       | -0.20 | 3.10  | 0.24 | 0.63 | 0.94 |
| mir-5p     | hsa-let-7b-5p            | 0.09  | 12.44 | 0.24 | 0.63 | 0.94 |
| mir-5p3pno | hsa-miR-320a             | -0.10 | 11.47 | 0.24 | 0.63 | 0.94 |

|            |                        |       |       |      |      |      |
|------------|------------------------|-------|-------|------|------|------|
| snoRNA     | U18C                   | -0.40 | 1.82  | 0.24 | 0.63 | 0.94 |
| rRNA       | LSU-rRNA_Hsa-L147      | 0.33  | 2.71  | 0.24 | 0.63 | 0.94 |
| scRNA      | HY4-L162               | -0.24 | 1.63  | 0.24 | 0.63 | 0.94 |
| tRNA       | chr1.tRNA134-GluTTC    | -0.11 | 7.46  | 0.23 | 0.63 | 0.94 |
| scRNA      | HY1-L418               | -0.24 | 1.65  | 0.23 | 0.63 | 0.94 |
| snoRNA     | U43                    | 0.22  | 4.98  | 0.23 | 0.63 | 0.94 |
| snoRNA     | U25                    | -0.25 | 5.22  | 0.23 | 0.63 | 0.94 |
| piRNA      | piR-51119              | 0.43  | 2.10  | 0.23 | 0.63 | 0.94 |
| snoRNA     | U60                    | 0.24  | 4.24  | 0.23 | 0.63 | 0.94 |
| mir-3p     | hsa-miR-3591-3p        | -0.25 | 12.23 | 0.23 | 0.63 | 0.94 |
| mir-5p     | hsa-miR-27b-5p         | 0.30  | 1.72  | 0.23 | 0.63 | 0.94 |
| tRNA       | chr13.tRNA4-GluCTC     | -0.20 | 2.05  | 0.23 | 0.63 | 0.94 |
| rRNA       | 5S-L1144               | 0.28  | 1.35  | 0.23 | 0.63 | 0.94 |
| mir-5p3pno | hsa-miR-4473           | -0.29 | 1.39  | 0.23 | 0.63 | 0.94 |
| tRNA       | chr6.tRNA166-AlaAGC    | -0.32 | 1.70  | 0.23 | 0.63 | 0.94 |
| piRNA      | piR-36494              | 0.37  | 2.01  | 0.22 | 0.64 | 0.94 |
| tRF3       | chrX.tRNA2-LeuTAA-tRF3 | 0.28  | 1.81  | 0.22 | 0.64 | 0.95 |
| mir-5p3pno | hsa-miR-181d           | -0.14 | 3.89  | 0.22 | 0.64 | 0.95 |
| mir-3p     | hsa-miR-127-3p         | -0.21 | 5.05  | 0.22 | 0.64 | 0.95 |
| scRNA      | HY1-L69                | 0.16  | 4.12  | 0.22 | 0.64 | 0.95 |
| rRNA       | LSU-rRNA_Hsa-L230      | -0.16 | 3.40  | 0.22 | 0.64 | 0.95 |
| mir-5p     | hsa-miR-1255b-5p-L2    | 0.27  | 1.57  | 0.22 | 0.64 | 0.95 |
| mir-5p     | hsa-let-7f-5p-L2       | -0.12 | 6.08  | 0.22 | 0.64 | 0.95 |
| tRNA       | chr6.tRNA175-SerGCT    | -0.53 | 1.84  | 0.22 | 0.64 | 0.95 |
| scRNA      | HY1-L192               | 0.13  | 6.00  | 0.22 | 0.64 | 0.95 |
| rRNA       | LSU-rRNA_Hsa-L212      | -0.16 | 3.26  | 0.21 | 0.64 | 0.95 |
| snoRNA     | U16                    | -0.28 | 2.76  | 0.21 | 0.64 | 0.95 |
| scRNA      | HY5-L21                | -0.15 | 11.03 | 0.21 | 0.65 | 0.95 |
| snRNA      | U3-L79                 | 0.23  | 3.26  | 0.21 | 0.65 | 0.95 |
| mir-5p     | hsa-miR-361-5p         | -0.19 | 3.45  | 0.21 | 0.65 | 0.95 |
| snRNA      | U1-L63                 | 0.23  | 2.48  | 0.21 | 0.65 | 0.95 |
| scRNA      | BC200-L166             | 0.23  | 2.90  | 0.21 | 0.65 | 0.95 |
| snoRNA     | U58A                   | -0.22 | 5.05  | 0.21 | 0.65 | 0.95 |
| scRNA      | HY1-L171               | 0.21  | 1.67  | 0.21 | 0.65 | 0.95 |
| scRNA      | HY1-L121               | 0.22  | 2.70  | 0.20 | 0.65 | 0.95 |
| mir-5p3pno | hsa-miR-1290           | -0.42 | 2.07  | 0.20 | 0.65 | 0.95 |
| mir-5p     | hsa-miR-450a-5p        | 0.23  | 3.27  | 0.20 | 0.65 | 0.95 |
| scRNA      | HY3-L279               | 0.15  | 5.23  | 0.20 | 0.65 | 0.95 |
| snRNA      | U1-L78                 | -0.32 | 1.37  | 0.20 | 0.65 | 0.95 |
| scRNA      | BC200-L60              | -0.25 | 2.37  | 0.20 | 0.66 | 0.95 |
| tRNA       | chr17.tRNA17-SupTTA    | 0.24  | 2.93  | 0.20 | 0.66 | 0.95 |
| snoRNA     | HBII-210               | -0.19 | 5.49  | 0.19 | 0.66 | 0.96 |
| mir-5p     | hsa-miR-32-5p          | 0.15  | 3.51  | 0.19 | 0.66 | 0.96 |

|            |                             |       |       |      |      |      |
|------------|-----------------------------|-------|-------|------|------|------|
| snoRNA     | ACA3                        | 0.22  | 2.48  | 0.19 | 0.66 | 0.96 |
| rRNA       | 5S-L102                     | 0.12  | 7.38  | 0.18 | 0.67 | 0.96 |
| scRNA      | HY5                         | 0.26  | 1.57  | 0.18 | 0.67 | 0.96 |
| rRNA       | 5S-L126                     | 0.18  | 2.56  | 0.18 | 0.67 | 0.96 |
| scRNA      | HY1-L103                    | -0.21 | 2.43  | 0.18 | 0.67 | 0.96 |
| snRNA      | U2-L887                     | 0.19  | 6.34  | 0.18 | 0.67 | 0.96 |
| snRNA      | U14-L3                      | 0.34  | 1.49  | 0.18 | 0.67 | 0.96 |
| snRNA      | U6-L1696                    | -0.30 | 1.92  | 0.18 | 0.67 | 0.96 |
| tRNA       | chr12.tRNA11-PheGAA         | -0.31 | 1.78  | 0.18 | 0.67 | 0.96 |
| tRF5       | chr17.tRNA21-ArgCCT-tRF5    | -0.28 | 1.41  | 0.18 | 0.67 | 0.96 |
| scRNA      | HY3-L190                    | 0.19  | 2.21  | 0.18 | 0.67 | 0.96 |
| scRNA      | BC200-L90                   | 0.21  | 2.57  | 0.18 | 0.67 | 0.96 |
| mir-3p     | hsa-miR-27b-3p              | -0.10 | 8.89  | 0.18 | 0.67 | 0.96 |
| rRNA       | 5S-L344                     | 0.18  | 2.38  | 0.18 | 0.67 | 0.96 |
| mir-3p     | hsa-miR-576-3p              | -0.13 | 3.99  | 0.18 | 0.67 | 0.96 |
| snRNA      | U14-L5                      | -0.19 | 4.26  | 0.18 | 0.67 | 0.96 |
| mir-5p3pno | hsa-miR-1250                | -0.27 | 1.50  | 0.18 | 0.68 | 0.96 |
| tRNA       | chr14.tRNA16-TyrGTA         | -0.23 | 3.57  | 0.18 | 0.68 | 0.96 |
| scRNA      | HY1-L179                    | 0.12  | 6.41  | 0.18 | 0.68 | 0.96 |
| snoRNA     | U95                         | -0.15 | 6.97  | 0.17 | 0.68 | 0.96 |
| tRNA       | chr5.tRNA22-AspGTC          | 0.32  | 1.95  | 0.17 | 0.68 | 0.96 |
| mir-3p     | hsa-miR-10a-3p              | 0.24  | 1.80  | 0.17 | 0.68 | 0.96 |
| mir-5p     | hsa-miR-106a-5p             | 0.18  | 2.73  | 0.17 | 0.68 | 0.96 |
| mir-3p     | hsa-miR-132-3p              | 0.25  | 1.93  | 0.17 | 0.68 | 0.96 |
| snoRNA     | HBII-295                    | 0.27  | 3.06  | 0.17 | 0.68 | 0.96 |
| mir-5p     | hsa-miR-424-5p              | 0.23  | 2.83  | 0.17 | 0.68 | 0.96 |
| tRF5       | chr17.tRNA25-SeCTCA-tRF5    | 0.21  | 2.24  | 0.17 | 0.68 | 0.96 |
| mir-5p     | hsa-miR-486-5p              | -0.10 | 13.33 | 0.17 | 0.68 | 0.96 |
| snRNA      | U6-L440                     | 0.35  | 1.97  | 0.17 | 0.68 | 0.96 |
| mir-5p3pno | hsa-miR-1-L2                | 0.17  | 4.82  | 0.17 | 0.68 | 0.96 |
| rRNA       | 5S-L586                     | 0.19  | 2.11  | 0.17 | 0.68 | 0.96 |
| mir-3p     | hsa-miR-495-3p              | 0.22  | 2.90  | 0.17 | 0.68 | 0.96 |
| mir-5p     | hsa-miR-877-5p              | -0.21 | 2.35  | 0.17 | 0.68 | 0.96 |
| mir-3p     | hsa-miR-25-3p               | -0.10 | 12.06 | 0.17 | 0.68 | 0.96 |
| mir-3p     | hsa-miR-136-3p              | -0.23 | 2.56  | 0.16 | 0.69 | 0.96 |
| scRNA      | BC200-L36                   | 0.24  | 2.62  | 0.16 | 0.69 | 0.96 |
| rRNA       | 5S-L1067                    | 0.16  | 2.55  | 0.16 | 0.69 | 0.96 |
| scRNA      | HY1-L243                    | 0.11  | 6.55  | 0.16 | 0.69 | 0.96 |
| tRF5       | chr1.tRNA109-PseudoGTT-tRF5 | 0.28  | 1.69  | 0.16 | 0.69 | 0.96 |
| mir-3p     | hsa-miR-28-3p               | -0.09 | 7.09  | 0.16 | 0.69 | 0.96 |
| mir-5p     | hsa-miR-185-5p              | 0.13  | 8.18  | 0.16 | 0.69 | 0.96 |
| piRNA      | piR-33151-L8                | 0.13  | 4.43  | 0.16 | 0.69 | 0.96 |
| scRNA      | HY4-L81                     | -0.14 | 3.17  | 0.16 | 0.69 | 0.96 |

|            |                            |       |       |      |      |      |
|------------|----------------------------|-------|-------|------|------|------|
| snRNA      | U1-L4                      | 0.16  | 8.30  | 0.16 | 0.69 | 0.96 |
| snRNA      | U1-L39                     | -0.26 | 1.73  | 0.16 | 0.69 | 0.96 |
| piRNA      | piR-50811                  | 0.17  | 3.45  | 0.16 | 0.69 | 0.96 |
| tRNA       | chr1.tRNA5-GluTTC          | 0.18  | 5.87  | 0.15 | 0.69 | 0.96 |
| mir-5p     | hsa-miR-20a-5p             | 0.13  | 7.09  | 0.15 | 0.69 | 0.96 |
| scRNA      | HY4-L154                   | -0.26 | 1.53  | 0.15 | 0.69 | 0.96 |
| piRNA      | piR-57824                  | -0.22 | 1.45  | 0.15 | 0.70 | 0.96 |
| mir-3p     | hsa-miR-103a-3p-L2         | 0.14  | 3.31  | 0.15 | 0.70 | 0.96 |
| tRNA       | chr16.tRNA31-PseudoTGG     | 0.27  | 3.04  | 0.15 | 0.70 | 0.96 |
| rRNA       | 5S-L877                    | 0.18  | 2.32  | 0.15 | 0.70 | 0.96 |
| rRNA       | SSU-rRNA_Hsa-L26           | -0.17 | 3.26  | 0.15 | 0.70 | 0.96 |
| tRF5       | chr4.tRNA3-CysGCA-tRF5     | -0.25 | 1.61  | 0.15 | 0.70 | 0.96 |
| mir-3p     | hsa-miR-652-3p             | -0.12 | 3.92  | 0.15 | 0.70 | 0.96 |
| scRNA      | BC200-L95                  | 0.19  | 3.16  | 0.15 | 0.70 | 0.96 |
| mir-5p     | hsa-miR-106b-5p            | 0.13  | 3.49  | 0.14 | 0.70 | 0.96 |
| scRNA      | BC200-L54                  | -0.15 | 4.71  | 0.14 | 0.70 | 0.96 |
| snRNA      | U2-L161                    | 0.21  | 12.42 | 0.14 | 0.71 | 0.97 |
| scRNA      | BC200-L10                  | -0.20 | 2.61  | 0.14 | 0.71 | 0.97 |
| tRNA       | chr3.tRNA10-PseudoCTC      | 0.09  | 7.61  | 0.14 | 0.71 | 0.97 |
| tRNA       | chr6.tRNA75-MetCAT         | 0.31  | 1.36  | 0.14 | 0.71 | 0.97 |
| scRNA      | HY4-L69                    | -0.08 | 9.90  | 0.14 | 0.71 | 0.97 |
| mir-3p     | hsa-miR-4742-3p            | 0.29  | 1.43  | 0.14 | 0.71 | 0.97 |
| piRNA      | piR-45195-L2               | -0.31 | 1.31  | 0.14 | 0.71 | 0.97 |
| snoRNA     | U56                        | 0.22  | 2.64  | 0.14 | 0.71 | 0.97 |
| snoRNA     | HBII-85-10                 | 0.20  | 1.74  | 0.14 | 0.71 | 0.97 |
| mir-5p3pno | hsa-miR-3609               | -0.21 | 2.89  | 0.14 | 0.71 | 0.97 |
| tRNA       | chr6.tRNA66-AlaTGC         | 0.24  | 1.94  | 0.13 | 0.71 | 0.97 |
| mir-5p3pno | hsa-miR-410                | -0.32 | 1.73  | 0.13 | 0.71 | 0.97 |
| snoRNA     | HBII-55                    | 0.21  | 4.52  | 0.13 | 0.71 | 0.97 |
| piRNA      | piR-36170                  | -0.23 | 2.58  | 0.13 | 0.72 | 0.97 |
| tRNA       | chr16.tRNA25-GlyGCC        | -0.11 | 4.81  | 0.13 | 0.72 | 0.97 |
| rRNA       | 5S-L397                    | -0.18 | 1.50  | 0.13 | 0.72 | 0.97 |
| piRNA      | piR-61465                  | -0.17 | 3.77  | 0.13 | 0.72 | 0.97 |
| tRF3       | chr17.tRNA33-PseudoTTG-tRF | 0.15  | 4.42  | 0.13 | 0.72 | 0.97 |
| rRNA       | LSU-rRNA_Hsa-L355          | -0.15 | 3.28  | 0.13 | 0.72 | 0.97 |
| scRNA      | HY4-L47                    | -0.16 | 2.66  | 0.13 | 0.72 | 0.97 |
| rRNA       | 5S-L500                    | 0.21  | 1.79  | 0.13 | 0.72 | 0.97 |
| tRF3       | chr16.tRNA11-ProAGG-tRF3   | 0.21  | 1.80  | 0.13 | 0.72 | 0.97 |
| tRNA       | chr16.tRNA34-GlyCCC        | 0.15  | 4.00  | 0.12 | 0.72 | 0.97 |
| scRNA      | HY3-L140                   | 0.19  | 2.65  | 0.12 | 0.73 | 0.97 |
| scRNA      | HY1-L155                   | 0.15  | 2.67  | 0.12 | 0.73 | 0.97 |
| scRNA      | HY4-L54                    | -0.08 | 6.72  | 0.12 | 0.73 | 0.97 |
| tRNA       | chr14.tRNA19-TyrGTA        | -0.19 | 2.49  | 0.12 | 0.73 | 0.97 |

|            |                          |       |       |      |      |      |
|------------|--------------------------|-------|-------|------|------|------|
| scRNA      | HY4-L139                 | 0.08  | 10.85 | 0.12 | 0.73 | 0.97 |
| scRNA      | HY1-L10                  | 0.20  | 1.56  | 0.12 | 0.73 | 0.97 |
| piRNA      | piR-33650                | 0.18  | 3.05  | 0.12 | 0.73 | 0.97 |
| mir-5p     | hsa-miR-30b-5p           | -0.18 | 2.40  | 0.12 | 0.73 | 0.97 |
| mir-3p     | hsa-miR-486-3p           | -0.09 | 10.83 | 0.12 | 0.73 | 0.97 |
| piRNA      | piR-49143                | 0.08  | 11.94 | 0.12 | 0.73 | 0.97 |
| rRNA       | LSU-rRNA_Hsa-L163        | 0.17  | 9.11  | 0.12 | 0.73 | 0.97 |
| tRF3       | chr22.tRNA1-SeCTCA-tRF3  | 0.18  | 4.55  | 0.11 | 0.74 | 0.98 |
| tRF5       | chr6.tRNA130-GlnTTG-tRF5 | -0.18 | 1.87  | 0.11 | 0.74 | 0.98 |
| rRNA       | LSU-rRNA_Hsa-L200        | 0.15  | 2.73  | 0.11 | 0.74 | 0.98 |
| piRNA      | piR-33160                | 0.18  | 1.69  | 0.11 | 0.74 | 0.98 |
| mir-5p3pno | hsa-miR-3138             | -0.26 | 1.72  | 0.11 | 0.74 | 0.98 |
| mir-5p     | hsa-miR-379-5p           | -0.14 | 5.32  | 0.11 | 0.74 | 0.98 |
| snoRNA     | HBII-234                 | -0.22 | 2.41  | 0.11 | 0.74 | 0.98 |
| mir-5p     | hsa-miR-369-5p           | 0.25  | 1.73  | 0.11 | 0.74 | 0.98 |
| snoRNA     | U50B                     | -0.16 | 4.36  | 0.11 | 0.74 | 0.98 |
| snRNA      | U2-L128                  | -0.13 | 7.41  | 0.11 | 0.75 | 0.98 |
| scRNA      | HY1-L277                 | -0.13 | 3.62  | 0.10 | 0.75 | 0.98 |
| mir-5p     | hsa-miR-769-5p           | 0.14  | 2.92  | 0.10 | 0.75 | 0.98 |
| tRNA       | chr14.tRNA4-ThrTGT       | -0.24 | 1.38  | 0.10 | 0.75 | 0.98 |
| tRNA       | chr5.tRNA14-ProTGG       | -0.11 | 4.87  | 0.10 | 0.75 | 0.98 |
| scRNA      | HY1-L143                 | -0.14 | 2.34  | 0.10 | 0.75 | 0.98 |
| snoRNA     | U42A                     | -0.19 | 4.47  | 0.10 | 0.75 | 0.98 |
| tRNA       | chr6.tRNA123-SerGCT      | 0.17  | 2.17  | 0.10 | 0.75 | 0.98 |
| mir-3p     | hsa-miR-374c-3p          | 0.14  | 2.88  | 0.10 | 0.75 | 0.98 |
| snRNA      | U2-L386                  | 0.24  | 2.90  | 0.10 | 0.75 | 0.98 |
| scRNA      | HY4-L59                  | 0.08  | 4.57  | 0.10 | 0.75 | 0.98 |
| mir-5p3pno | hsa-miR-2110             | 0.08  | 5.18  | 0.10 | 0.75 | 0.98 |
| mir-5p3pno | hsa-miR-370              | -0.17 | 4.88  | 0.10 | 0.75 | 0.98 |
| rRNA       | 5S-L1178                 | -0.16 | 1.51  | 0.10 | 0.76 | 0.98 |
| tRF5       | chr14.tRNA8-CysGCA-tRF5  | -0.21 | 2.20  | 0.10 | 0.76 | 0.98 |
| rRNA       | 5S-L233                  | 0.14  | 2.21  | 0.10 | 0.76 | 0.98 |
| scRNA      | HY4-L30                  | 0.09  | 3.52  | 0.10 | 0.76 | 0.98 |
| tRNA       | chr19.tRNA13-ValCAC      | -0.11 | 4.34  | 0.10 | 0.76 | 0.98 |
| tRNA       | chr1.tRNA16-HisGTG       | -0.08 | 11.66 | 0.10 | 0.76 | 0.98 |
| snoRNA     | HBII-239                 | 0.12  | 4.73  | 0.10 | 0.76 | 0.98 |
| scRNA      | HY4-L43                  | -0.13 | 2.20  | 0.09 | 0.76 | 0.98 |
| scRNA      | HY4-L142                 | -0.11 | 3.10  | 0.09 | 0.76 | 0.98 |
| rRNA       | LSU-rRNA_Hsa-L139        | 0.07  | 14.17 | 0.09 | 0.76 | 0.98 |
| mir-5p3pno | hsa-miR-4485             | -0.14 | 4.31  | 0.09 | 0.76 | 0.98 |
| mir-5p3pno | hsa-miR-618              | 0.17  | 2.71  | 0.09 | 0.76 | 0.98 |
| scRNA      | HY1-L227                 | 0.23  | 1.27  | 0.09 | 0.76 | 0.98 |
| scRNA      | BC200-L147               | 0.19  | 2.25  | 0.09 | 0.76 | 0.98 |



|            |                      |       |       |      |      |      |
|------------|----------------------|-------|-------|------|------|------|
| mir-5p3pno | hsa-miR-5096         | -0.29 | 2.21  | 0.09 | 0.76 | 0.98 |
| rRNA       | 5S-L1075             | -0.12 | 3.12  | 0.09 | 0.76 | 0.98 |
| mir-5p     | hsa-miR-196b-5p      | -0.16 | 2.79  | 0.09 | 0.76 | 0.98 |
| tRNA       | chr1.tRNA119-LysCTT  | 0.08  | 7.13  | 0.09 | 0.76 | 0.98 |
| rRNA       | 5S-L758              | 0.14  | 2.61  | 0.09 | 0.76 | 0.98 |
| scRNA      | HY1-L208             | -0.11 | 3.31  | 0.09 | 0.76 | 0.98 |
| piRNA      | piR-36074            | -0.11 | 4.26  | 0.09 | 0.76 | 0.98 |
| scRNA      | HY4-L151             | -0.12 | 2.40  | 0.09 | 0.77 | 0.98 |
| scRNA      | HY5-L7               | 0.17  | 2.28  | 0.09 | 0.77 | 0.98 |
| mir-3p     | hsa-miR-654-3p       | 0.16  | 3.65  | 0.09 | 0.77 | 0.98 |
| piRNA      | piR-53659            | 0.21  | 2.19  | 0.09 | 0.77 | 0.98 |
| snRNA      | U4-L24               | -0.24 | 1.58  | 0.09 | 0.77 | 0.98 |
| scRNA      | BC200-L7             | 0.16  | 2.63  | 0.09 | 0.77 | 0.98 |
| snoRNA     | U38A                 | -0.16 | 4.23  | 0.08 | 0.77 | 0.98 |
| snRNA      | U2-L240              | 0.21  | 3.39  | 0.08 | 0.77 | 0.98 |
| piRNA      | piR-61646-L2         | -0.10 | 8.66  | 0.08 | 0.77 | 0.98 |
| snoRNA     | ACA66                | 0.21  | 2.25  | 0.08 | 0.77 | 0.98 |
| snRNA      | U2-L603              | 0.17  | 6.18  | 0.08 | 0.77 | 0.98 |
| rRNA       | 5S-L254              | -0.12 | 2.29  | 0.08 | 0.77 | 0.98 |
| rRNA       | LSU-rRNA_Hsa-L366    | -0.12 | 4.95  | 0.08 | 0.78 | 0.98 |
| scRNA      | HY1-L302             | 0.11  | 2.47  | 0.08 | 0.78 | 0.98 |
| rRNA       | SSU-rRNA_Hsa-L67     | -0.16 | 3.08  | 0.08 | 0.78 | 0.98 |
| scRNA      | HY1-L443             | 0.08  | 7.18  | 0.08 | 0.78 | 0.98 |
| mir-3p     | hsa-miR-148b-3p      | -0.07 | 8.56  | 0.08 | 0.78 | 0.98 |
| scRNA      | BC200-L31            | 0.22  | 1.42  | 0.08 | 0.78 | 0.98 |
| scRNA      | HY1-L276             | -0.10 | 3.14  | 0.08 | 0.78 | 0.98 |
| scRNA      | HY4-L112             | -0.08 | 3.99  | 0.08 | 0.78 | 0.98 |
| mir-5p3pno | hsa-miR-451a         | -0.09 | 12.65 | 0.08 | 0.78 | 0.98 |
| scRNA      | BC200-L128           | -0.13 | 2.60  | 0.08 | 0.78 | 0.98 |
| snRNA      | U1-L8                | -0.11 | 6.17  | 0.08 | 0.78 | 0.98 |
| mir-5p3pno | hsa-miR-1244-L2      | 0.18  | 1.65  | 0.08 | 0.78 | 0.98 |
| scRNA      | HY1-L25              | 0.14  | 1.83  | 0.08 | 0.78 | 0.98 |
| rRNA       | 5S-L137              | -0.13 | 1.96  | 0.08 | 0.78 | 0.98 |
| tRNA       | chr2.tRNA1-PseudoCCC | -0.08 | 5.85  | 0.08 | 0.78 | 0.98 |
| rRNA       | SSU-rRNA_Hsa-L3      | 0.18  | 1.28  | 0.08 | 0.78 | 0.98 |
| mir-5p     | hsa-miR-409-5p       | -0.25 | 1.55  | 0.07 | 0.78 | 0.98 |
| mir-3p     | hsa-let-7f-2-3p      | -0.15 | 1.55  | 0.07 | 0.78 | 0.98 |
| mir-5p     | hsa-miR-30d-5p       | 0.06  | 10.80 | 0.07 | 0.79 | 0.98 |
| tRNA       | chr1.tRNA9-ArgTCT    | -0.13 | 2.46  | 0.07 | 0.79 | 0.98 |
| scRNA      | BC200-L122           | -0.11 | 3.29  | 0.07 | 0.79 | 0.98 |
| snoRNA     | U81                  | -0.13 | 6.29  | 0.07 | 0.79 | 0.98 |
| snoRNA     | HBII-336             | -0.19 | 2.08  | 0.07 | 0.79 | 0.98 |
| snoRNA     | U49A                 | 0.11  | 7.55  | 0.07 | 0.79 | 0.98 |

|            |                          |       |       |      |      |      |
|------------|--------------------------|-------|-------|------|------|------|
| piRNA      | piR-35548-L2             | -0.10 | 7.19  | 0.07 | 0.79 | 0.98 |
| tRNA       | chr1.tRNA102-PseudoTTC   | -0.06 | 6.55  | 0.07 | 0.79 | 0.98 |
| rRNA       | 5S-L1152                 | 0.14  | 1.58  | 0.07 | 0.79 | 0.98 |
| rRNA       | LSU-rRNA_Hsa-L34         | 0.19  | 1.34  | 0.07 | 0.79 | 0.98 |
| mir-3p     | hsa-miR-671-3p           | 0.09  | 4.05  | 0.07 | 0.79 | 0.98 |
| mir-3p     | hsa-miR-18a-3p           | 0.13  | 2.18  | 0.07 | 0.79 | 0.98 |
| mir-3p     | hsa-miR-708-3p           | -0.17 | 1.52  | 0.07 | 0.79 | 0.98 |
| mir-3p     | hsa-miR-3150b-3p         | 0.18  | 1.47  | 0.07 | 0.79 | 0.98 |
| mir-5p     | hsa-miR-3605-5p          | -0.14 | 2.59  | 0.07 | 0.79 | 0.98 |
| snRNA      | U1-L33                   | -0.12 | 2.57  | 0.07 | 0.80 | 0.98 |
| mir-5p     | hsa-miR-140-5p           | 0.10  | 4.18  | 0.07 | 0.80 | 0.98 |
| tRNA       | chr12.tRNA5-AspGTC       | 0.10  | 4.65  | 0.07 | 0.80 | 0.98 |
| rRNA       | 5S-L1014                 | 0.17  | 1.64  | 0.07 | 0.80 | 0.98 |
| piRNA      | piR-44984-L6             | -0.12 | 2.44  | 0.06 | 0.80 | 0.98 |
| scRNA      | BC200-L93                | 0.21  | 1.57  | 0.06 | 0.80 | 0.98 |
| scRNA      | HY1-L259                 | 0.08  | 5.50  | 0.06 | 0.80 | 0.98 |
| snoRNA     | HBI-100                  | -0.08 | 4.39  | 0.06 | 0.80 | 0.98 |
| scRNA      | HY1-L342                 | -0.19 | 1.35  | 0.06 | 0.80 | 0.98 |
| rRNA       | LSU-rRNA_Hsa-L383        | -0.05 | 14.16 | 0.06 | 0.80 | 0.98 |
| snoRNA     | U24                      | 0.16  | 2.10  | 0.06 | 0.80 | 0.98 |
| piRNA      | piR-32678                | 0.06  | 6.11  | 0.06 | 0.81 | 0.98 |
| scRNA      | HY1-L292                 | 0.07  | 5.49  | 0.06 | 0.81 | 0.98 |
| piRNA      | piR-59299                | 0.16  | 1.70  | 0.06 | 0.81 | 0.98 |
| rRNA       | LSU-rRNA_Hsa-L339        | -0.19 | 2.37  | 0.06 | 0.81 | 0.98 |
| mir-5p3pno | hsa-miR-1299             | -0.22 | 2.09  | 0.06 | 0.81 | 0.98 |
| mir-5p     | hsa-miR-25-5p            | -0.16 | 2.08  | 0.06 | 0.81 | 0.98 |
| mir-5p3pno | hsa-miR-320e             | -0.12 | 1.81  | 0.06 | 0.81 | 0.98 |
| mir-5p3pno | hsa-miR-484              | 0.07  | 6.19  | 0.06 | 0.81 | 0.98 |
| snoRNA     | ACA44                    | -0.17 | 2.30  | 0.06 | 0.81 | 0.98 |
| piRNA      | piR-35548-L4             | -0.08 | 7.24  | 0.06 | 0.81 | 0.98 |
| piRNA      | piR-31038                | -0.07 | 9.22  | 0.06 | 0.81 | 0.98 |
| mir-5p3pno | hsa-miR-548e             | 0.12  | 2.60  | 0.06 | 0.81 | 0.98 |
| snoRNA     | HBI-43                   | 0.12  | 3.62  | 0.05 | 0.82 | 0.98 |
| tRF5       | chr1.tRNA130-ValCAC-tRF5 | -0.12 | 2.38  | 0.05 | 0.82 | 0.98 |
| snoRNA     | U53                      | -0.15 | 2.70  | 0.05 | 0.82 | 0.98 |
| piRNA      | piR-39361                | 0.21  | 2.65  | 0.05 | 0.82 | 0.98 |
| piRNA      | piR-60577-L3             | -0.07 | 7.09  | 0.05 | 0.82 | 0.98 |
| scRNA      | HY4-L37                  | 0.08  | 4.02  | 0.05 | 0.82 | 0.98 |
| rRNA       | LSU-rRNA_Hsa-L252        | -0.09 | 2.98  | 0.05 | 0.82 | 0.98 |
| tRNA       | chr6.tRNA14-TyrGTA       | 0.14  | 1.91  | 0.05 | 0.82 | 0.98 |
| mir-3p     | hsa-miR-22-3p            | 0.05  | 10.17 | 0.05 | 0.82 | 0.98 |
| snoRNA     | ACA46                    | 0.14  | 2.22  | 0.05 | 0.82 | 0.98 |
| mir-5p     | hsa-miR-100-5p           | -0.07 | 6.46  | 0.05 | 0.82 | 0.98 |

|            |                           |       |      |      |      |      |
|------------|---------------------------|-------|------|------|------|------|
| mir-5p3pno | hsa-miR-511-L2            | 0.11  | 3.83 | 0.05 | 0.82 | 0.98 |
| tRF5       | chr3.tRNA9-PseudoTTG-tRF5 | -0.16 | 1.99 | 0.05 | 0.82 | 0.98 |
| scRNA      | HY1-L295                  | -0.07 | 4.38 | 0.05 | 0.82 | 0.98 |
| rRNA       | 5S-L955                   | 0.11  | 1.52 | 0.05 | 0.82 | 0.98 |
| scRNA      | HY4-L71                   | -0.06 | 5.98 | 0.05 | 0.83 | 0.98 |
| scRNA      | HY4-L34                   | -0.11 | 1.72 | 0.05 | 0.83 | 0.98 |
| mir-3p     | hsa-miR-324-3p            | 0.13  | 1.75 | 0.05 | 0.83 | 0.98 |
| mir-5p     | hsa-miR-16-5p-L2          | 0.08  | 8.43 | 0.05 | 0.83 | 0.98 |
| mir-5p     | hsa-miR-744-5p            | 0.06  | 6.54 | 0.05 | 0.83 | 0.98 |
| tRNA       | chr6.tRNA148-SerTGA       | -0.14 | 3.50 | 0.05 | 0.83 | 0.98 |
| mir-3p     | hsa-miR-500a-3p           | -0.08 | 3.30 | 0.05 | 0.83 | 0.98 |
| mir-5p     | hsa-miR-192-5p            | 0.05  | 8.19 | 0.05 | 0.83 | 0.98 |
| scRNA      | HY4-L126                  | -0.07 | 3.61 | 0.05 | 0.83 | 0.98 |
| mir-3p     | hsa-miR-30a-3p            | 0.06  | 5.25 | 0.05 | 0.83 | 0.98 |
| scRNA      | BC200-L19                 | 0.19  | 1.34 | 0.05 | 0.83 | 0.98 |
| snoRNA     | U45A                      | -0.10 | 4.17 | 0.05 | 0.83 | 0.98 |
| snRNA      | U2-L981                   | 0.14  | 4.08 | 0.05 | 0.83 | 0.98 |
| snoRNA     | ACA3-2                    | 0.12  | 2.58 | 0.04 | 0.83 | 0.98 |
| tRNA       | chr1.tRNA72-AspGTC        | 0.08  | 7.24 | 0.04 | 0.83 | 0.98 |
| scRNA      | HY4-L11                   | 0.18  | 1.44 | 0.04 | 0.83 | 0.98 |
| snoRNA     | HBII-85-3                 | -0.16 | 2.58 | 0.04 | 0.83 | 0.98 |
| scRNA      | BC200-L116                | -0.11 | 2.42 | 0.04 | 0.84 | 0.98 |
| rRNA       | 5S-L367                   | 0.09  | 1.90 | 0.04 | 0.84 | 0.98 |
| tRNA       | chr6.tRNA131-GlnCTG       | 0.14  | 1.57 | 0.04 | 0.84 | 0.98 |
| scRNA      | HY1-L414                  | -0.11 | 1.30 | 0.04 | 0.84 | 0.98 |
| mir-5p     | hsa-miR-4732-5p           | 0.09  | 3.24 | 0.04 | 0.84 | 0.98 |
| rRNA       | 5S-L191                   | -0.07 | 4.67 | 0.04 | 0.84 | 0.98 |
| piRNA      | piR-48772-L2              | 0.11  | 1.94 | 0.04 | 0.84 | 0.98 |
| snRNA      | U6-L9                     | 0.09  | 4.69 | 0.04 | 0.84 | 0.98 |
| scRNA      | HY5-L8                    | 0.08  | 3.89 | 0.04 | 0.84 | 0.98 |
| scRNA      | BC200-L13                 | 0.12  | 2.84 | 0.04 | 0.84 | 0.98 |
| snoRNA     | U50                       | -0.09 | 5.85 | 0.04 | 0.84 | 0.98 |
| snRNA      | U1-L29                    | 0.11  | 2.04 | 0.04 | 0.84 | 0.98 |
| mir-5p     | hsa-miR-505-5p            | -0.13 | 1.80 | 0.04 | 0.84 | 0.98 |
| snRNA      | U2-L532                   | 0.18  | 3.09 | 0.04 | 0.84 | 0.98 |
| scRNA      | BC200-L117                | 0.16  | 1.77 | 0.04 | 0.84 | 0.98 |
| mir-5p3pno | hsa-miR-433               | 0.10  | 3.45 | 0.04 | 0.84 | 0.98 |
| mir-3p     | hsa-let-7a-3p-L2          | -0.09 | 3.00 | 0.04 | 0.84 | 0.98 |
| rRNA       | 5S-L136                   | -0.12 | 1.51 | 0.04 | 0.84 | 0.98 |
| scRNA      | HY1                       | -0.06 | 6.02 | 0.04 | 0.84 | 0.98 |
| rRNA       | 5S-L1009                  | -0.11 | 2.50 | 0.04 | 0.84 | 0.98 |
| scRNA      | HY1-L149                  | 0.06  | 3.80 | 0.04 | 0.84 | 0.98 |
| mir-3p     | hsa-miR-3158-3p           | 0.08  | 3.67 | 0.04 | 0.84 | 0.98 |

|            |                         |       |       |      |      |      |
|------------|-------------------------|-------|-------|------|------|------|
| mir-5p3pno | hsa-miR-651             | -0.08 | 3.27  | 0.04 | 0.84 | 0.98 |
| snoRNA     | ACA61                   | -0.17 | 2.03  | 0.04 | 0.85 | 0.98 |
| mir-5p     | hsa-miR-766-5p          | 0.09  | 1.79  | 0.04 | 0.85 | 0.98 |
| scRNA      | HY3-L478                | -0.05 | 8.14  | 0.04 | 0.85 | 0.98 |
| mir-3p     | hsa-miR-382-3p          | -0.15 | 2.13  | 0.03 | 0.85 | 0.98 |
| mir-5p3pno | hsa-miR-494             | -0.14 | 1.76  | 0.03 | 0.85 | 0.98 |
| scRNA      | HY4-L21                 | 0.08  | 2.21  | 0.03 | 0.85 | 0.98 |
| mir-3p     | hsa-miR-499b-3p         | 0.08  | 3.24  | 0.03 | 0.85 | 0.98 |
| piRNA      | piR-52041               | 0.10  | 1.79  | 0.03 | 0.86 | 0.98 |
| scRNA      | HY5-L11                 | -0.07 | 5.18  | 0.03 | 0.86 | 0.98 |
| mir-5p     | hsa-miR-10a-5p          | -0.05 | 8.84  | 0.03 | 0.86 | 0.98 |
| mir-5p3pno | hsa-miR-320c            | 0.05  | 4.42  | 0.03 | 0.86 | 0.98 |
| rRNA       | LSU-rRNA_Hsa-L221       | 0.09  | 2.76  | 0.03 | 0.86 | 0.98 |
| scRNA      | HY4-L39                 | 0.06  | 3.89  | 0.03 | 0.86 | 0.98 |
| mir-5p3pno | hsa-miR-152             | -0.06 | 5.52  | 0.03 | 0.86 | 0.98 |
| snoRNA     | ACA45                   | -0.04 | 6.67  | 0.03 | 0.86 | 0.98 |
| mir-3p     | hsa-miR-425-3p          | -0.06 | 4.17  | 0.03 | 0.86 | 0.98 |
| tRF5       | chr14.tRNA4-ThrTGT-tRF5 | 0.09  | 2.20  | 0.03 | 0.86 | 0.98 |
| mir-3p     | hsa-miR-3529-3p         | -0.04 | 7.63  | 0.03 | 0.86 | 0.98 |
| tRF3       | chr3.tRNA2-ValAAC-tRF3  | 0.08  | 4.12  | 0.03 | 0.86 | 0.98 |
| scRNA      | HY1-L190                | 0.09  | 2.44  | 0.03 | 0.86 | 0.98 |
| mir-3p     | hsa-miR-4446-3p         | 0.07  | 3.54  | 0.03 | 0.86 | 0.98 |
| mir-5p3pno | hsa-miR-326             | -0.09 | 1.96  | 0.03 | 0.86 | 0.98 |
| tRNA       | chr6.tRNA74-LeuCAA      | 0.08  | 2.36  | 0.03 | 0.87 | 0.98 |
| snRNA      | U7-L52                  | 0.08  | 6.86  | 0.03 | 0.87 | 0.98 |
| mir-5p3pno | hsa-miR-3928            | 0.11  | 1.49  | 0.03 | 0.87 | 0.98 |
| snRNA      | U1-L47                  | -0.08 | 1.99  | 0.03 | 0.87 | 0.98 |
| tRNA       | chr17.tRNA31-AsnGTT     | 0.07  | 2.61  | 0.03 | 0.87 | 0.98 |
| snoRNA     | HBII-13                 | 0.11  | 3.94  | 0.03 | 0.87 | 0.98 |
| tRNA       | chr8.tRNA5-TyrGTA       | -0.14 | 1.92  | 0.03 | 0.87 | 0.98 |
| snRNA      | U7-L212                 | 0.15  | 2.26  | 0.03 | 0.87 | 0.98 |
| scRNA      | HY1-L321                | 0.05  | 4.60  | 0.02 | 0.87 | 0.98 |
| snoRNA     | HBII-99                 | -0.08 | 4.93  | 0.02 | 0.87 | 0.98 |
| snoRNA     | U18A                    | 0.08  | 6.83  | 0.02 | 0.87 | 0.98 |
| scRNA      | BC200-L27               | -0.09 | 2.99  | 0.02 | 0.88 | 0.98 |
| tRF5       | chr5.tRNA22-AspGTC-tRF5 | -0.09 | 2.32  | 0.02 | 0.88 | 0.98 |
| mir-5p3pno | hsa-miR-95              | 0.06  | 2.67  | 0.02 | 0.88 | 0.98 |
| mir-5p     | hsa-miR-10b-5p          | 0.04  | 10.17 | 0.02 | 0.88 | 0.98 |
| scRNA      | HY3-L372                | 0.09  | 2.49  | 0.02 | 0.88 | 0.98 |
| scRNA      | HY4-L146                | -0.09 | 1.61  | 0.02 | 0.88 | 0.98 |
| snoRNA     | U32A                    | 0.09  | 4.10  | 0.02 | 0.88 | 0.98 |
| snRNA      | U2-L1001                | -0.08 | 2.26  | 0.02 | 0.88 | 0.98 |
| piRNA      | piR-38600               | -0.08 | 3.96  | 0.02 | 0.88 | 0.99 |

|            |                     |       |       |      |      |      |
|------------|---------------------|-------|-------|------|------|------|
| snoRNA     | ACA20               | 0.09  | 2.32  | 0.02 | 0.88 | 0.99 |
| scRNA      | HY4-L42             | -0.07 | 1.44  | 0.02 | 0.88 | 0.99 |
| mir-5p3pno | hsa-miR-1301        | 0.05  | 4.03  | 0.02 | 0.89 | 0.99 |
| piRNA      | piR-34041           | -0.10 | 4.18  | 0.02 | 0.89 | 0.99 |
| tRNA       | chr6.tRNA100-LeuCAA | 0.05  | 3.50  | 0.02 | 0.89 | 0.99 |
| mir-5p     | hsa-miR-411-5p      | 0.08  | 2.70  | 0.02 | 0.89 | 0.99 |
| snoRNA     | snR38C              | -0.12 | 2.04  | 0.02 | 0.89 | 0.99 |
| scRNA      | HY4-L53             | 0.04  | 3.76  | 0.02 | 0.89 | 0.99 |
| rRNA       | LSU-rRNA_Hsa-L15    | 0.04  | 6.50  | 0.02 | 0.89 | 0.99 |
| mir-3p     | hsa-miR-625-3p      | 0.05  | 4.66  | 0.02 | 0.89 | 0.99 |
| rRNA       | LSU-rRNA_Hsa-L43    | 0.11  | 1.51  | 0.02 | 0.89 | 0.99 |
| mir-5p     | hsa-miR-574-5p      | 0.05  | 4.86  | 0.02 | 0.90 | 0.99 |
| snoRNA     | U37                 | 0.13  | 1.73  | 0.02 | 0.90 | 0.99 |
| mir-5p     | hsa-miR-28-5p       | -0.04 | 5.05  | 0.02 | 0.90 | 0.99 |
| scRNA      | HY1-L397            | 0.05  | 3.25  | 0.02 | 0.90 | 0.99 |
| tRNA       | chr11.tRNA8-SerGCT  | 0.05  | 4.11  | 0.01 | 0.90 | 0.99 |
| tRNA       | chr1.tRNA58-LeuCAA  | 0.06  | 3.42  | 0.01 | 0.90 | 0.99 |
| tRNA       | chr1.tRNA81-AspGTC  | 0.05  | 4.37  | 0.01 | 0.90 | 0.99 |
| mir-5p3pno | hsa-miR-543         | 0.05  | 5.85  | 0.01 | 0.90 | 0.99 |
| mir-5p     | hsa-let-7g-5p       | -0.03 | 11.03 | 0.01 | 0.90 | 0.99 |
| tRNA       | chr3.tRNA7-CysGCA   | 0.06  | 1.81  | 0.01 | 0.90 | 0.99 |
| scRNA      | HY4-L127            | 0.03  | 11.01 | 0.01 | 0.91 | 0.99 |
| snoRNA     | U45C                | -0.07 | 2.63  | 0.01 | 0.91 | 0.99 |
| snoRNA     | HBII-142            | 0.06  | 3.44  | 0.01 | 0.91 | 0.99 |
| mir-5p     | hsa-miR-550a-3-5p   | 0.06  | 1.55  | 0.01 | 0.91 | 0.99 |
| tRNA       | chr1.tRNA106-HisGTG | 0.04  | 3.35  | 0.01 | 0.91 | 0.99 |
| scRNA      | HY3-L432            | -0.06 | 1.48  | 0.01 | 0.91 | 0.99 |
| tRNA       | chr6.tRNA83-LeuTAA  | -0.05 | 2.22  | 0.01 | 0.91 | 0.99 |
| snoRNA     | U103B               | 0.07  | 3.30  | 0.01 | 0.91 | 0.99 |
| tRNA       | chr1.tRNA79-GlyTCC  | -0.09 | 1.83  | 0.01 | 0.91 | 0.99 |
| scRNA      | HY3-L196            | -0.05 | 1.86  | 0.01 | 0.91 | 0.99 |
| mir-5p     | hsa-miR-432-5p      | -0.05 | 5.12  | 0.01 | 0.92 | 0.99 |
| rRNA       | 5S-L1143            | 0.05  | 1.65  | 0.01 | 0.92 | 0.99 |
| mir-3p     | hsa-miR-17-3p       | -0.07 | 1.51  | 0.01 | 0.92 | 0.99 |
| rRNA       | LSU-rRNA_Hsa-L365   | 0.06  | 1.57  | 0.01 | 0.92 | 0.99 |
| rRNA       | 5S-L363             | -0.09 | 1.46  | 0.01 | 0.92 | 0.99 |
| tRNA       | chr14.tRNA3-ProTGG  | 0.04  | 3.94  | 0.01 | 0.92 | 0.99 |
| scRNA      | HY1-L279            | -0.03 | 4.05  | 0.01 | 0.92 | 0.99 |
| snRNA      | U1-L24              | -0.05 | 2.67  | 0.01 | 0.92 | 0.99 |
| snRNA      | U2-L615             | 0.07  | 13.03 | 0.01 | 0.92 | 0.99 |
| mir-5p     | hsa-miR-589-5p      | -0.03 | 4.55  | 0.01 | 0.92 | 0.99 |
| mir-5p     | hsa-miR-452-5p      | -0.08 | 1.74  | 0.01 | 0.92 | 0.99 |
| mir-5p     | hsa-miR-1228-5p     | -0.06 | 2.00  | 0.01 | 0.92 | 0.99 |

|            |                           |       |       |      |      |      |
|------------|---------------------------|-------|-------|------|------|------|
| snoRNA     | U36A                      | 0.13  | 1.72  | 0.01 | 0.92 | 0.99 |
| snRNA      | U2-L288                   | 0.05  | 2.57  | 0.01 | 0.92 | 0.99 |
| scRNA      | HY1-L434                  | 0.03  | 6.47  | 0.01 | 0.92 | 0.99 |
| scRNA      | BC200-L148                | 0.08  | 2.05  | 0.01 | 0.92 | 0.99 |
| piRNA      | piR-36716                 | 0.05  | 2.89  | 0.01 | 0.92 | 0.99 |
| tRNA       | chr17.tRNA3-GlnCTG        | 0.03  | 6.71  | 0.01 | 0.93 | 0.99 |
| mir-5p     | hsa-miR-15b-5p            | 0.03  | 2.69  | 0.01 | 0.93 | 0.99 |
| tRF5       | chr16.tRNA8-ProTGG-tRF5   | -0.06 | 2.11  | 0.01 | 0.93 | 0.99 |
| mir-3p     | hsa-miR-200a-3p           | -0.06 | 2.21  | 0.01 | 0.93 | 0.99 |
| tRF3       | chr16.tRNA31-PseudoTGG-tR | 0.04  | 1.90  | 0.01 | 0.93 | 0.99 |
| scRNA      | HY1-L67                   | 0.03  | 6.02  | 0.01 | 0.93 | 0.99 |
| tRNA       | chr6.tRNA128-GlyGCC       | 0.03  | 4.34  | 0.01 | 0.93 | 0.99 |
| snoRNA     | U41                       | 0.06  | 2.50  | 0.01 | 0.93 | 0.99 |
| snoRNA     | U58B                      | -0.04 | 4.93  | 0.01 | 0.93 | 0.99 |
| scRNA      | HY1-L419                  | 0.03  | 3.97  | 0.01 | 0.93 | 0.99 |
| mir-5p     | hsa-miR-3158-5p-L2        | -0.06 | 1.49  | 0.01 | 0.93 | 0.99 |
| snoRNA     | U46                       | 0.05  | 4.51  | 0.01 | 0.93 | 0.99 |
| mir-3p     | hsa-miR-27a-3p            | 0.02  | 10.79 | 0.01 | 0.93 | 0.99 |
| rRNA       | 5S-L21                    | -0.03 | 2.70  | 0.01 | 0.93 | 0.99 |
| rRNA       | SSU-rRNA_Hsa-L24          | 0.02  | 9.31  | 0.01 | 0.93 | 0.99 |
| mir-5p3pno | hsa-miR-1468              | 0.05  | 2.23  | 0.01 | 0.93 | 0.99 |
| piRNA      | piR-35952-L4              | -0.05 | 3.24  | 0.01 | 0.93 | 0.99 |
| scRNA      | BC200-L29                 | 0.04  | 2.94  | 0.01 | 0.93 | 0.99 |
| scRNA      | HY5-L19                   | -0.05 | 2.11  | 0.01 | 0.93 | 0.99 |
| scRNA      | HY4-L16                   | 0.03  | 3.90  | 0.01 | 0.94 | 0.99 |
| snoRNA     | U47                       | 0.05  | 3.90  | 0.01 | 0.94 | 0.99 |
| snRNA      | U2-L537                   | -0.05 | 2.77  | 0.01 | 0.94 | 0.99 |
| scRNA      | HY3-L497                  | -0.06 | 2.13  | 0.01 | 0.94 | 0.99 |
| scRNA      | BC200-L67                 | 0.04  | 4.18  | 0.01 | 0.94 | 0.99 |
| scRNA      | HY4-L41                   | 0.03  | 1.87  | 0.01 | 0.94 | 0.99 |
| piRNA      | piR-41588                 | -0.06 | 1.58  | 0.01 | 0.94 | 0.99 |
| tRNA       | chr17.tRNA18-ArgCCT       | -0.04 | 1.72  | 0.01 | 0.94 | 0.99 |
| scRNA      | HY1-L260                  | 0.02  | 4.90  | 0.01 | 0.94 | 0.99 |
| tRNA       | chr17.tRNA16-GlnTTG       | 0.03  | 2.35  | 0.01 | 0.94 | 0.99 |
| snoRNA     | U22                       | -0.04 | 3.84  | 0.01 | 0.94 | 0.99 |
| scRNA      | BC200-L114                | 0.03  | 2.20  | 0.01 | 0.94 | 0.99 |
| tRF3       | chr3.tRNA6-CysGCA-tRF3    | -0.05 | 2.19  | 0.01 | 0.94 | 0.99 |
| mir-5p     | hsa-miR-374a-5p           | 0.03  | 2.91  | 0.01 | 0.94 | 0.99 |
| mir-5p     | hsa-miR-660-5p            | -0.03 | 3.48  | 0.01 | 0.94 | 0.99 |
| piRNA      | piR-37525                 | 0.03  | 1.54  | 0.01 | 0.94 | 0.99 |
| snRNA      | U5-L22                    | 0.08  | 1.99  | 0.01 | 0.94 | 0.99 |
| tRNA       | chr1.tRNA116-GluCTC       | -0.03 | 3.81  | 0.01 | 0.94 | 0.99 |
| snoRNA     | ACA51                     | -0.04 | 2.13  | 0.01 | 0.94 | 0.99 |

|            |                             |       |       |      |      |      |
|------------|-----------------------------|-------|-------|------|------|------|
| mir-5p3pno | hsa-miR-4488                | -0.07 | 1.33  | 0.01 | 0.94 | 0.99 |
| mir-5p     | hsa-miR-4433-5p             | 0.03  | 5.16  | 0.00 | 0.94 | 0.99 |
| mir-3p     | hsa-miR-197-3p              | -0.04 | 2.66  | 0.00 | 0.94 | 0.99 |
| mir-5p     | hsa-miR-654-5p              | 0.04  | 3.06  | 0.00 | 0.94 | 0.99 |
| piRNA      | piR-61648                   | 0.03  | 2.29  | 0.00 | 0.95 | 0.99 |
| mir-5p3pno | hsa-miR-4447                | -0.07 | 1.27  | 0.00 | 0.95 | 0.99 |
| tRF5       | chr1.tRNA132-PseudoCAC-tRF5 | 0.04  | 2.08  | 0.00 | 0.95 | 0.99 |
| snoRNA     | U64                         | -0.04 | 2.08  | 0.00 | 0.95 | 0.99 |
| tRF3       | chr20.tRNA4-PseudoTAA-tRF3  | 0.02  | 4.77  | 0.00 | 0.95 | 0.99 |
| scRNA      | HY3-L84                     | -0.02 | 6.41  | 0.00 | 0.95 | 0.99 |
| mir-5p     | hsa-miR-194-5p              | -0.02 | 4.41  | 0.00 | 0.95 | 0.99 |
| mir-5p     | hsa-miR-550a-5p-L2          | 0.02  | 3.36  | 0.00 | 0.95 | 0.99 |
| snoRNA     | U15B                        | -0.05 | 2.20  | 0.00 | 0.95 | 0.99 |
| tRNA       | chr2.tRNA2-TyrGTA           | -0.05 | 1.68  | 0.00 | 0.95 | 0.99 |
| mir-5p     | hsa-miR-146a-5p             | 0.02  | 9.37  | 0.00 | 0.95 | 0.99 |
| mir-3p     | hsa-miR-335-3p              | 0.03  | 3.66  | 0.00 | 0.95 | 0.99 |
| tRF5       | chr1.tRNA90-ValCAC-tRF5     | -0.04 | 2.12  | 0.00 | 0.95 | 0.99 |
| mir-5p     | hsa-miR-142-5p              | 0.02  | 5.71  | 0.00 | 0.95 | 0.99 |
| scRNA      | HY4-L132                    | -0.03 | 2.52  | 0.00 | 0.95 | 0.99 |
| rRNA       | 5S-L1270                    | 0.03  | 1.26  | 0.00 | 0.95 | 0.99 |
| mir-5p3pno | hsa-miR-203a                | -0.04 | 2.30  | 0.00 | 0.96 | 0.99 |
| mir-5p     | hsa-miR-485-5p              | -0.03 | 4.20  | 0.00 | 0.96 | 0.99 |
| mir-3p     | hsa-miR-10b-3p              | 0.02  | 1.69  | 0.00 | 0.96 | 0.99 |
| mir-3p     | hsa-miR-200c-3p             | -0.03 | 2.75  | 0.00 | 0.96 | 0.99 |
| snRNA      | U5-L66                      | -0.02 | 7.02  | 0.00 | 0.96 | 0.99 |
| snoRNA     | U63                         | -0.02 | 5.95  | 0.00 | 0.96 | 0.99 |
| tRNA       | chr18.tRNA4-LysCTT          | 0.02  | 6.31  | 0.00 | 0.96 | 0.99 |
| snoRNA     | U82                         | -0.02 | 5.08  | 0.00 | 0.96 | 0.99 |
| snRNA      | U2-L205                     | -0.06 | 1.72  | 0.00 | 0.96 | 0.99 |
| tRNA       | chr17.tRNA36-ThrAGT         | 0.03  | 2.02  | 0.00 | 0.96 | 0.99 |
| tRF5       | chr6.tRNA129-MetCAT-tRF5    | -0.03 | 2.00  | 0.00 | 0.96 | 0.99 |
| mir-5p     | hsa-miR-26a-5p-L2           | 0.01  | 10.74 | 0.00 | 0.96 | 0.99 |
| scRNA      | HY3-L177                    | 0.03  | 1.55  | 0.00 | 0.96 | 0.99 |
| snoRNA     | U105B                       | -0.03 | 4.78  | 0.00 | 0.96 | 0.99 |
| tRF5       | chr1.tRNA98-ValCAC-tRF5     | 0.02  | 2.65  | 0.00 | 0.96 | 0.99 |
| snoRNA     | mgh18S-121                  | -0.05 | 1.91  | 0.00 | 0.96 | 0.99 |
| tRF5       | chr9.tRNA6-AspGTC-tRF5      | 0.02  | 2.92  | 0.00 | 0.96 | 0.99 |
| scRNA      | HY1-L57                     | 0.02  | 2.77  | 0.00 | 0.97 | 0.99 |
| rRNA       | LSU-rRNA_Hsa-L151           | -0.02 | 3.08  | 0.00 | 0.97 | 0.99 |
| scRNA      | HY1-L133                    | 0.02  | 2.79  | 0.00 | 0.97 | 0.99 |
| mir-5p     | hsa-miR-125b-5p-L2          | -0.02 | 3.21  | 0.00 | 0.97 | 0.99 |
| mir-5p3pno | hsa-miR-215                 | -0.02 | 3.77  | 0.00 | 0.97 | 0.99 |
| snoRNA     | U23                         | -0.04 | 1.46  | 0.00 | 0.97 | 0.99 |

|            |                    |       |       |      |      |      |
|------------|--------------------|-------|-------|------|------|------|
| scRNA      | HY1-L287           | -0.01 | 6.18  | 0.00 | 0.97 | 0.99 |
| scRNA      | HY4-L58            | 0.01  | 3.82  | 0.00 | 0.97 | 0.99 |
| rRNA       | 5S-L983            | 0.01  | 1.77  | 0.00 | 0.97 | 0.99 |
| scRNA      | HY1-L273           | -0.01 | 1.91  | 0.00 | 0.98 | 0.99 |
| mir-3p     | hsa-miR-3184-3p    | 0.01  | 11.60 | 0.00 | 0.98 | 0.99 |
| tRNA       | chr6.tRNA63-IleTAT | -0.01 | 1.51  | 0.00 | 0.98 | 0.99 |
| mir-3p     | hsa-miR-29a-3p     | 0.01  | 5.92  | 0.00 | 0.98 | 0.99 |
| scRNA      | BC200-L8           | -0.01 | 2.76  | 0.00 | 0.98 | 0.99 |
| snRNA      | U1-L174            | -0.02 | 1.75  | 0.00 | 0.98 | 0.99 |
| scRNA      | BC200-L167         | -0.01 | 1.56  | 0.00 | 0.98 | 0.99 |
| snoRNA     | U55                | 0.01  | 5.86  | 0.00 | 0.98 | 0.99 |
| mir-3p     | hsa-miR-1307-3p    | -0.01 | 7.97  | 0.00 | 0.98 | 0.99 |
| snoRNA     | snR38B             | -0.01 | 3.28  | 0.00 | 0.98 | 0.99 |
| mir-5p     | hsa-miR-3613-5p    | 0.01  | 4.55  | 0.00 | 0.98 | 0.99 |
| scRNA      | HY3-L287           | 0.01  | 1.40  | 0.00 | 0.99 | 0.99 |
| scRNA      | HY1-L226           | 0.01  | 3.30  | 0.00 | 0.99 | 0.99 |
| rRNA       | 5S-L1068           | -0.01 | 2.39  | 0.00 | 0.99 | 0.99 |
| mir-3p     | hsa-miR-2355-3p    | 0.01  | 1.86  | 0.00 | 0.99 | 0.99 |
| mir-3p     | hsa-miR-199b-3p    | 0.00  | 7.55  | 0.00 | 0.99 | 0.99 |
| snoRNA     | U85                | -0.01 | 3.08  | 0.00 | 0.99 | 0.99 |
| tRNA       | chr7.tRNA7-CysGCA  | 0.01  | 7.04  | 0.00 | 0.99 | 0.99 |
| scRNA      | HY1-L3             | 0.00  | 3.08  | 0.00 | 0.99 | 0.99 |
| mir-3p     | hsa-miR-23b-3p     | 0.00  | 3.55  | 0.00 | 0.99 | 0.99 |
| mir-5p3pno | hsa-miR-3672       | 0.00  | 1.51  | 0.00 | 0.99 | 0.99 |
| scRNA      | HY3-L512           | 0.05  | 2.04  | 0.00 | 0.99 | 0.99 |
| mir-3p     | hsa-miR-548g-3p    | -0.01 | 2.11  | 0.00 | 0.99 | 0.99 |
| scRNA      | HY5-L9             | -0.01 | 1.36  | 0.00 | 0.99 | 0.99 |
| snRNA      | U17                | -0.01 | 1.82  | 0.00 | 0.99 | 1.00 |
| rRNA       | 5S-L815            | 0.00  | 2.57  | 0.00 | 1.00 | 1.00 |
| snoRNA     | U80                | -0.01 | 3.38  | 0.00 | 1.00 | 1.00 |



**Supplementary Table 5: Results of differential expression analysis (RF+ vs RF-)**

| <i>RNA type</i> | <i>ID</i>                  | <i>Log2 fold change (RF+ vs. RF-)</i> | <i>Average read count (log2 CPM)</i> | <i>Likelihood ratio</i> | <i>Unadjusted P-value</i> | <i>Adjusted P-value</i> |
|-----------------|----------------------------|---------------------------------------|--------------------------------------|-------------------------|---------------------------|-------------------------|
| tRNA            | chr1.tRNA131-GlyCCC        | -2.57                                 | 7.00                                 | 29.79                   | 4.81E-08                  | 7.15E-05                |
| piRNA           | piR-35982                  | -1.36                                 | 15.63                                | 15.41                   | 8.66E-05                  | 4.89E-02                |
| tRNA            | chr6.tRNA82-GlyGCC         | -1.34                                 | 5.27                                 | 15.16                   | 9.86E-05                  | 4.89E-02                |
| piRNA           | piR-35284                  | -1.26                                 | 8.07                                 | 13.46                   | 2.44E-04                  | 6.93E-02                |
| tRNA            | chr1.tRNA96-PseudoCCT      | -1.07                                 | 8.20                                 | 13.33                   | 2.61E-04                  | 6.93E-02                |
| tRNA            | chr2.tRNA13-AlaCGC         | -1.10                                 | 6.52                                 | 13.20                   | 2.79E-04                  | 6.93E-02                |
| tRNA            | chr1.tRNA99-ValCAC         | -0.98                                 | 8.58                                 | 11.65                   | 6.42E-04                  | 0.14                    |
| tRNA            | chr1.tRNA43-GlyGCC         | -1.01                                 | 6.87                                 | 11.13                   | 8.49E-04                  | 0.16                    |
| tRNA            | chr6.tRNA37-ValAAC         | -1.02                                 | 9.05                                 | 10.87                   | 9.75E-04                  | 0.16                    |
| piRNA           | piR-31925                  | -0.89                                 | 11.30                                | 10.41                   | 1.25E-03                  | 0.19                    |
| snRNA           | U1-L142                    | -1.45                                 | 4.24                                 | 9.99                    | 1.57E-03                  | 0.19                    |
| piRNA           | piR-60565-L4               | -0.84                                 | 12.26                                | 9.94                    | 1.62E-03                  | 0.19                    |
| tRNA            | chr1.tRNA88-PseudoCCT      | -0.95                                 | 6.19                                 | 9.92                    | 1.63E-03                  | 0.19                    |
| tRNA            | chr2.tRNA17-PseudoTTC      | -0.90                                 | 7.07                                 | 9.55                    | 2.00E-03                  | 0.21                    |
| piRNA           | piR-60565-L12              | -0.88                                 | 10.99                                | 9.34                    | 2.24E-03                  | 0.21                    |
| piRNA           | piR-31925-L9               | -0.84                                 | 13.82                                | 9.30                    | 2.29E-03                  | 0.21                    |
| piRNA           | piR-31068-L3               | -1.29                                 | 3.12                                 | 9.11                    | 2.55E-03                  | 0.21                    |
| tRNA            | chr17.tRNA13-GlyCCC        | -1.01                                 | 5.82                                 | 9.10                    | 2.55E-03                  | 0.21                    |
| tRNA            | chr2.tRNA3-AlaAGC          | -1.40                                 | 3.59                                 | 8.63                    | 3.31E-03                  | 0.25                    |
| mir-3p          | hsa-miR-101-3p             | -0.79                                 | 10.61                                | 8.62                    | 3.32E-03                  | 0.25                    |
| snoRNA          | U20                        | -1.34                                 | 6.66                                 | 8.31                    | 3.94E-03                  | 0.28                    |
| piRNA           | piR-35982-L6               | -1.85                                 | 1.98                                 | 8.11                    | 4.41E-03                  | 0.28                    |
| tRNA            | chr13.tRNA3-GluTTC         | -0.69                                 | 10.17                                | 8.07                    | 4.50E-03                  | 0.28                    |
| tRF3            | chr10.tRNA5-PseudoCTG-tRF3 | -1.39                                 | 1.70                                 | 8.01                    | 4.64E-03                  | 0.28                    |
| snRNA           | U2-L75                     | 1.77                                  | 4.87                                 | 7.97                    | 4.74E-03                  | 0.28                    |
| piRNA           | piR-31638-L3               | -1.00                                 | 7.00                                 | 7.83                    | 5.13E-03                  | 0.29                    |
| snRNA           | U2-L405                    | 1.80                                  | 3.55                                 | 7.52                    | 6.09E-03                  | 0.33                    |
| snRNA           | U1-L11                     | -1.26                                 | 3.90                                 | 7.46                    | 6.29E-03                  | 0.33                    |
| snRNA           | U2-L603                    | 1.46                                  | 6.16                                 | 7.35                    | 6.70E-03                  | 0.33                    |
| tRNA            | chr6.tRNA136-ValAAC        | 1.55                                  | 2.04                                 | 7.34                    | 6.75E-03                  | 0.33                    |
| snRNA           | U2-L782                    | 1.51                                  | 2.99                                 | 7.00                    | 8.15E-03                  | 0.39                    |
| snRNA           | U2-L615                    | 1.64                                  | 13.00                                | 6.91                    | 8.58E-03                  | 0.40                    |
| snoRNA          | SNORD119                   | -1.19                                 | 5.61                                 | 6.83                    | 8.97E-03                  | 0.40                    |
| scRNA           | BC200-L165                 | 1.82                                  | 1.54                                 | 6.64                    | 9.98E-03                  | 0.43                    |
| rRNA            | LSU-rRNA_Hsa-L339          | -1.71                                 | 2.35                                 | 6.62                    | 1.01E-02                  | 0.43                    |
| mir-5p          | hsa-miR-200c-5p            | -1.86                                 | 2.02                                 | 6.55                    | 1.05E-02                  | 0.43                    |
| mir-5p3pr       | hsa-miR-1246               | 1.52                                  | 5.82                                 | 6.52                    | 1.07E-02                  | 0.43                    |
| tRF3            | chr3.tRNA10-PseudoCTC-tRF3 | 2.17                                  | 1.55                                 | 6.37                    | 1.16E-02                  | 0.43                    |

|          |                          |       |       |      |          |      |
|----------|--------------------------|-------|-------|------|----------|------|
| tRNA     | chr16.tRNA24-GlyGCC      | -0.67 | 15.82 | 6.33 | 1.19E-02 | 0.43 |
| snRNA    | U2-L342                  | 1.39  | 5.41  | 6.32 | 1.20E-02 | 0.43 |
| mir-5p   | hsa-miR-27b-5p           | 1.64  | 1.72  | 6.31 | 1.20E-02 | 0.43 |
| snRNA    | U3-L75                   | -1.25 | 3.12  | 6.28 | 1.22E-02 | 0.43 |
| scRNA    | HY3-L479                 | -1.55 | 2.10  | 6.26 | 1.24E-02 | 0.43 |
| tRNA     | chr18.tRNA4-LysCTT       | 0.95  | 6.31  | 6.21 | 1.27E-02 | 0.43 |
| rRNA     | LSU-rRNA_Hsa-L84         | -1.34 | 2.85  | 6.16 | 1.31E-02 | 0.43 |
| tRF3     | chr6.tRNA153-IleAAT-tRF3 | 1.63  | 2.68  | 6.12 | 1.34E-02 | 0.43 |
| piRNA    | piR-30112                | -1.33 | 2.68  | 6.07 | 1.37E-02 | 0.43 |
| snoRNA   | SNORD126                 | -1.44 | 2.74  | 5.99 | 1.44E-02 | 0.45 |
| snRNA    | U2-L1061                 | 1.23  | 11.07 | 5.90 | 1.52E-02 | 0.46 |
| rRNA     | LSU-rRNA_Hsa-L64         | -1.32 | 1.52  | 5.84 | 1.56E-02 | 0.47 |
| snRNA    | U2-L250                  | 1.38  | 12.48 | 5.77 | 1.63E-02 | 0.47 |
| tRNA     | chr1.tRNA2-GlyCCC        | -0.80 | 5.38  | 5.64 | 1.75E-02 | 0.50 |
| tRNA     | chr6.tRNA147-SerAGA      | -0.83 | 8.22  | 5.44 | 1.97E-02 | 0.54 |
| tRNA     | chr16.tRNA33-PseudoAGG   | -1.06 | 3.64  | 5.44 | 1.97E-02 | 0.54 |
| tRF5     | chr11.tRNA16-ValTAC-tRF5 | -1.38 | 1.57  | 5.38 | 2.04E-02 | 0.54 |
| scRNA    | BC200-L32                | 1.58  | 2.06  | 5.35 | 2.07E-02 | 0.54 |
| tRNA     | chr1.tRNA39-GlyGCC       | -0.58 | 11.35 | 5.33 | 2.10E-02 | 0.54 |
| tRNA     | chr2.tRNA22-PseudoTTG    | -1.04 | 3.03  | 5.28 | 2.15E-02 | 0.54 |
| snoRNA   | ACA36                    | -1.66 | 1.90  | 5.26 | 2.18E-02 | 0.54 |
| snoRNA   | ACA47                    | -1.05 | 3.23  | 5.25 | 2.20E-02 | 0.54 |
| piRNA    | piR-31115-L4             | 0.69  | 7.28  | 5.24 | 2.21E-02 | 0.54 |
| scRNA    | HY4-L50                  | 1.44  | 1.52  | 5.15 | 2.32E-02 | 0.56 |
| mir-5p   | hsa-miR-1234-5p          | 0.76  | 14.77 | 5.09 | 2.41E-02 | 0.56 |
| tRNA     | chr19.tRNA8-SeCTCA       | 0.63  | 5.86  | 5.08 | 2.42E-02 | 0.56 |
| snoRNA   | U83A                     | -1.11 | 3.52  | 4.97 | 2.57E-02 | 0.58 |
| mir-3p   | hsa-miR-324-3p           | -1.15 | 1.81  | 4.97 | 2.59E-02 | 0.58 |
| scRNA    | HY4-L110                 | -1.50 | 1.99  | 4.93 | 2.64E-02 | 0.59 |
| snoRNA   | U3-4                     | -0.87 | 7.31  | 4.90 | 2.68E-02 | 0.59 |
| snoRNA   | U91                      | -1.72 | 2.24  | 4.83 | 2.79E-02 | 0.60 |
| tRNA     | chr17.tRNA5-GlyGCC       | -0.58 | 7.52  | 4.77 | 2.90E-02 | 0.61 |
| snRNA    | U5-L133                  | -1.07 | 2.25  | 4.75 | 2.93E-02 | 0.61 |
| mir-5p   | hsa-miR-150-5p           | -0.87 | 5.10  | 4.72 | 2.98E-02 | 0.61 |
| mir-5p   | hsa-miR-145-5p           | 1.53  | 1.79  | 4.70 | 3.01E-02 | 0.61 |
| tRF3     | chr14.tRNA14-GluTTC-tRF3 | -1.90 | 2.02  | 4.67 | 3.07E-02 | 0.61 |
| scRNA    | HY1-L149                 | 0.74  | 3.78  | 4.67 | 3.08E-02 | 0.61 |
| piRNA    | piR-36041                | -0.59 | 7.32  | 4.65 | 3.10E-02 | 0.61 |
| tRNA     | chr2.tRNA11-PseudoTTG    | -0.88 | 6.71  | 4.62 | 3.17E-02 | 0.61 |
| snRNA    | U2-L479                  | 1.71  | 1.54  | 4.61 | 3.18E-02 | 0.61 |
| mir-5p3p | hsa-miR-451a             | -0.68 | 12.70 | 4.58 | 3.23E-02 | 0.61 |
| snRNA    | U2-L532                  | 1.59  | 3.08  | 4.55 | 3.29E-02 | 0.61 |
| piRNA    | piR-47305                | -0.65 | 9.66  | 4.53 | 3.33E-02 | 0.61 |

|           |                         |       |       |      |          |      |
|-----------|-------------------------|-------|-------|------|----------|------|
| scRNA     | HY1-L409                | 0.88  | 2.73  | 4.50 | 3.39E-02 | 0.61 |
| snoRNA    | ACA21                   | -1.12 | 2.76  | 4.39 | 3.62E-02 | 0.64 |
| tRNA      | chr12.tRNA10-AspGTC     | 0.95  | 4.59  | 4.38 | 3.63E-02 | 0.64 |
| mir-5p    | hsa-miR-486-5p          | -0.56 | 13.44 | 4.36 | 3.68E-02 | 0.64 |
| mir-5p    | hsa-miR-3074-5p         | 0.54  | 9.31  | 4.31 | 3.80E-02 | 0.65 |
| snoRNA    | U57                     | -0.96 | 4.69  | 4.30 | 3.80E-02 | 0.65 |
| piRNA     | piR-35952-L5            | -1.11 | 2.44  | 4.24 | 3.94E-02 | 0.67 |
| rRNA      | 5S-L995                 | -1.98 | 3.46  | 4.21 | 4.03E-02 | 0.67 |
| snoRNA    | U80                     | -1.10 | 3.36  | 4.15 | 4.16E-02 | 0.69 |
| piRNA     | piR-36741               | -0.72 | 6.41  | 4.12 | 4.25E-02 | 0.69 |
| piRNA     | piR-36444               | -1.06 | 2.53  | 4.09 | 4.31E-02 | 0.70 |
| scRNA     | HY3-L159                | 1.18  | 3.19  | 4.06 | 4.38E-02 | 0.70 |
| snRNA     | U1-L138                 | -1.06 | 3.38  | 4.04 | 4.43E-02 | 0.70 |
| mir-5p    | hsa-miR-181a-5p-L2      | -0.43 | 8.55  | 3.98 | 4.60E-02 | 0.71 |
| mir-5p    | hsa-miR-5010-5p         | -1.32 | 1.44  | 3.97 | 4.64E-02 | 0.71 |
| snoRNA    | U37                     | -1.73 | 1.76  | 3.96 | 4.65E-02 | 0.71 |
| snoRNA    | U53                     | -1.19 | 2.70  | 3.92 | 4.76E-02 | 0.71 |
| snRNA     | U1-L45                  | -0.73 | 6.78  | 3.91 | 4.80E-02 | 0.71 |
| rRNA      | LSU-rRNA_Hsa-L300       | -1.00 | 7.63  | 3.88 | 4.89E-02 | 0.71 |
| tRNA      | chr6.tRNA63-IleTAT      | 1.31  | 1.53  | 3.87 | 4.92E-02 | 0.71 |
| tRNA      | chr1.tRNA110-PseudoTTC  | -1.04 | 1.44  | 3.84 | 5.00E-02 | 0.71 |
| snRNA     | U3-L4                   | -1.22 | 1.56  | 3.84 | 5.01E-02 | 0.71 |
| tRNA      | chr2.tRNA14-TyrATA      | -0.94 | 3.30  | 3.82 | 5.05E-02 | 0.71 |
| mir-3p    | hsa-miR-1306-3p         | -1.07 | 2.00  | 3.82 | 5.05E-02 | 0.71 |
| scRNA     | HY1-L304                | 0.76  | 3.88  | 3.82 | 5.06E-02 | 0.71 |
| mir-5p3pr | hsa-miR-6073            | -1.16 | 1.46  | 3.81 | 5.09E-02 | 0.71 |
| scRNA     | HY4-L146                | -0.96 | 1.61  | 3.79 | 5.15E-02 | 0.71 |
| snRNA     | U14-L2                  | -1.52 | 1.79  | 3.77 | 5.21E-02 | 0.71 |
| snoRNA    | ACA53                   | -1.20 | 3.01  | 3.72 | 5.37E-02 | 0.72 |
| piRNA     | piR-60576-L6            | -0.59 | 8.04  | 3.72 | 5.39E-02 | 0.72 |
| mir-5p    | hsa-let-7e-5p           | 0.58  | 5.52  | 3.70 | 5.44E-02 | 0.72 |
| scRNA     | HY1-L178                | 0.68  | 4.26  | 3.67 | 5.54E-02 | 0.73 |
| mir-5p3pr | hsa-miR-3615            | 0.45  | 7.34  | 3.62 | 5.70E-02 | 0.74 |
| tRNA      | chr6.tRNA105-AlaAGC     | -1.40 | 1.66  | 3.61 | 5.74E-02 | 0.74 |
| tRNA      | chr16.tRNA34-GlyCCC     | 0.81  | 4.00  | 3.58 | 5.84E-02 | 0.75 |
| snRNA     | U2-L981                 | 1.18  | 4.06  | 3.57 | 5.90E-02 | 0.75 |
| piRNA     | piR-33160               | 1.04  | 1.68  | 3.53 | 6.04E-02 | 0.75 |
| mir-5p3pr | hsa-miR-487b            | 1.73  | 1.50  | 3.52 | 6.05E-02 | 0.75 |
| tRNA      | chr22.tRNA1-SeCTCA      | 0.89  | 2.22  | 3.52 | 6.05E-02 | 0.75 |
| tRNA      | chr6.tRNA6-ArgACG       | 1.00  | 2.65  | 3.48 | 6.19E-02 | 0.75 |
| scRNA     | HY1-L121                | 0.86  | 2.72  | 3.48 | 6.21E-02 | 0.75 |
| tRF5      | chr16.tRNA8-ProTGG-tRF5 | -1.18 | 2.11  | 3.48 | 6.22E-02 | 0.75 |
| piRNA     | piR-43771-L6            | -0.87 | 2.90  | 3.42 | 6.43E-02 | 0.77 |

|          |                          |       |       |      |          |      |
|----------|--------------------------|-------|-------|------|----------|------|
| rRNA     | 5S-L612                  | 0.92  | 2.86  | 3.40 | 6.54E-02 | 0.77 |
| mir-5p   | hsa-miR-4787-5p          | 1.42  | 1.33  | 3.38 | 6.59E-02 | 0.77 |
| piRNA    | piR-38354                | 0.94  | 2.15  | 3.38 | 6.60E-02 | 0.77 |
| tRNA     | chr13.tRNA5-GluTTC       | -0.46 | 8.98  | 3.37 | 6.63E-02 | 0.77 |
| mir-3p   | hsa-miR-151a-3p          | -0.53 | 11.62 | 3.32 | 6.84E-02 | 0.79 |
| scRNA    | BC200-L146               | -0.90 | 2.61  | 3.27 | 7.03E-02 | 0.80 |
| mir-5p   | hsa-miR-221-5p           | -0.69 | 3.85  | 3.27 | 7.05E-02 | 0.80 |
| tRNA     | chr7.tRNA3-ArgCCT        | 0.54  | 5.38  | 3.26 | 7.11E-02 | 0.80 |
| tRNA     | chr7.tRNA7-CysGCA        | 0.82  | 7.06  | 3.25 | 7.15E-02 | 0.80 |
| tRNA     | chr15.tRNA4-ArgTCG       | -1.19 | 2.60  | 3.22 | 7.25E-02 | 0.80 |
| mir-5p   | hsa-miR-503-5p           | -0.70 | 3.20  | 3.19 | 7.40E-02 | 0.80 |
| snoRNA   | U15B                     | -1.09 | 2.19  | 3.18 | 7.44E-02 | 0.80 |
| mir-3p   | hsa-miR-25-3p            | -0.46 | 12.18 | 3.18 | 7.46E-02 | 0.80 |
| tRNA     | chr17.tRNA10-GlyTCC      | -0.99 | 1.81  | 3.17 | 7.49E-02 | 0.80 |
| rRNA     | 5S-L303                  | -1.13 | 2.33  | 3.15 | 7.61E-02 | 0.80 |
| tRNA     | chr5.tRNA8-AlaTGC        | -0.87 | 3.15  | 3.13 | 7.68E-02 | 0.80 |
| scRNA    | HY1-L435                 | 0.60  | 3.49  | 3.12 | 7.72E-02 | 0.80 |
| rRNA     | LSU-rRNA_Hsa-L295        | 0.70  | 3.46  | 3.12 | 7.74E-02 | 0.80 |
| rRNA     | LSU-rRNA_Hsa-L297        | 1.08  | 1.90  | 3.11 | 7.78E-02 | 0.80 |
| scRNA    | BC200-L149               | -1.13 | 1.76  | 3.10 | 7.83E-02 | 0.80 |
| snRNA    | U14-L5                   | -0.75 | 4.24  | 3.10 | 7.85E-02 | 0.80 |
| snoRNA   | mgh18S-121               | -1.36 | 1.93  | 3.07 | 7.99E-02 | 0.81 |
| snoRNA   | U100                     | -1.14 | 1.54  | 3.04 | 8.14E-02 | 0.82 |
| rRNA     | 5S-L955                  | -0.85 | 1.52  | 3.02 | 8.23E-02 | 0.82 |
| snRNA    | U2-L1074                 | 1.15  | 3.33  | 3.01 | 8.25E-02 | 0.82 |
| tRNA     | chr6.tRNA157-ValCAC      | -1.01 | 1.40  | 2.98 | 8.44E-02 | 0.83 |
| mir-5p3p | hsa-miR-598              | 1.21  | 1.77  | 2.97 | 8.48E-02 | 0.83 |
| snRNA    | U2-L537                  | 1.20  | 2.76  | 2.96 | 8.52E-02 | 0.83 |
| piRNA    | piR-41209-L2             | 0.75  | 3.72  | 2.95 | 8.59E-02 | 0.84 |
| tRF3     | chr16.tRNA11-ProAGG-tRF3 | -0.97 | 1.79  | 2.90 | 8.85E-02 | 0.85 |
| scRNA    | HY3-L359                 | 1.18  | 1.92  | 2.89 | 8.89E-02 | 0.85 |
| piRNA    | piR-36499                | 0.98  | 1.68  | 2.88 | 8.96E-02 | 0.85 |
| snoRNA   | ACA58                    | -1.19 | 1.85  | 2.88 | 8.96E-02 | 0.85 |
| piRNA    | piR-61174                | -1.07 | 1.23  | 2.86 | 9.10E-02 | 0.85 |
| piRNA    | piR-61648-L7             | 0.58  | 4.08  | 2.84 | 9.19E-02 | 0.85 |
| mir-5p   | hsa-miR-340-5p           | -0.50 | 6.42  | 2.84 | 9.20E-02 | 0.85 |
| rRNA     | LSU-rRNA_Hsa-L298        | -0.83 | 3.46  | 2.81 | 9.36E-02 | 0.85 |
| snRNA    | U2-L386                  | 1.18  | 2.89  | 2.80 | 9.40E-02 | 0.85 |
| rRNA     | 5S-L1115                 | -0.95 | 1.30  | 2.80 | 9.43E-02 | 0.85 |
| scRNA    | HY3-L497                 | -0.85 | 2.14  | 2.78 | 0.10     | 0.85 |
| mir-5p   | hsa-miR-214-5p           | 1.17  | 1.57  | 2.78 | 0.10     | 0.85 |
| snoRNA   | mgh28S-2409              | -1.06 | 3.15  | 2.77 | 0.10     | 0.85 |
| tRNA     | chr1.tRNA85-ValCAC       | 0.70  | 3.44  | 2.77 | 0.10     | 0.85 |

|           |                             |       |       |      |      |      |
|-----------|-----------------------------|-------|-------|------|------|------|
| piRNA     | piR-31068-L10               | -1.11 | 2.13  | 2.76 | 0.10 | 0.85 |
| mir-3p    | hsa-miR-92b-3p              | 0.49  | 4.74  | 2.74 | 0.10 | 0.85 |
| tRF3      | chr9.tRNA6-AspGTC-tRF3      | 1.07  | 1.45  | 2.73 | 0.10 | 0.85 |
| mir-5p    | hsa-miR-1292-5p             | -0.92 | 1.70  | 2.72 | 0.10 | 0.85 |
| scRNA     | HY3-L199                    | 0.82  | 1.72  | 2.71 | 0.10 | 0.85 |
| mir-3p    | hsa-miR-486-3p              | -0.47 | 10.93 | 2.71 | 0.10 | 0.85 |
| snoRNA    | U83                         | 0.94  | 2.97  | 2.70 | 0.10 | 0.85 |
| piRNA     | piR-31925-L8                | -0.54 | 7.36  | 2.70 | 0.10 | 0.85 |
| rRNA      | SSU-rRNA_Hsa-L46            | -0.68 | 6.10  | 2.69 | 0.10 | 0.85 |
| mir-5p3pr | hsa-miR-1244-L2             | 1.18  | 1.66  | 2.67 | 0.10 | 0.86 |
| scRNA     | BC200-L20                   | 1.18  | 1.94  | 2.63 | 0.11 | 0.87 |
| mir-5p3pr | hsa-miR-134                 | 0.69  | 6.74  | 2.62 | 0.11 | 0.87 |
| tRNA      | chr17.tRNA16-GlnTTG         | 0.70  | 2.36  | 2.61 | 0.11 | 0.88 |
| mir-3p    | hsa-miR-150-3p              | -0.83 | 2.88  | 2.60 | 0.11 | 0.88 |
| mir-3p    | hsa-miR-361-3p              | -0.43 | 7.04  | 2.55 | 0.11 | 0.88 |
| snoRNA    | U51                         | -1.08 | 2.71  | 2.55 | 0.11 | 0.88 |
| snoRNA    | HBII-429                    | -0.88 | 4.20  | 2.53 | 0.11 | 0.88 |
| snoRNA    | U74                         | -0.82 | 5.78  | 2.52 | 0.11 | 0.88 |
| scRNA     | HY1-L391                    | 0.41  | 14.88 | 2.52 | 0.11 | 0.88 |
| piRNA     | piR-35982-L11               | -1.27 | 1.95  | 2.51 | 0.11 | 0.88 |
| scRNA     | HY1-L374                    | 0.47  | 8.15  | 2.50 | 0.11 | 0.88 |
| piRNA     | piR-49145                   | 0.81  | 2.41  | 2.50 | 0.11 | 0.88 |
| mir-3p    | hsa-miR-493-3p              | -0.79 | 3.21  | 2.49 | 0.11 | 0.88 |
| tRNA      | chr6.tRNA88-PseudoGAA       | 0.59  | 8.20  | 2.47 | 0.12 | 0.88 |
| rRNA      | 5S-L1270                    | 0.96  | 1.27  | 2.46 | 0.12 | 0.88 |
| snRNA     | U17-L2                      | -1.01 | 2.12  | 2.46 | 0.12 | 0.88 |
| tRF5      | chr1.tRNA104-PseudoGTT-tRF5 | 0.80  | 2.69  | 2.44 | 0.12 | 0.88 |
| piRNA     | piR-32377                   | -0.47 | 6.91  | 2.43 | 0.12 | 0.88 |
| scRNA     | HY4-L132                    | 0.91  | 2.50  | 2.43 | 0.12 | 0.88 |
| scRNA     | HY1-L100                    | 0.42  | 8.91  | 2.42 | 0.12 | 0.88 |
| scRNA     | HY1-L37                     | 0.45  | 6.31  | 2.42 | 0.12 | 0.88 |
| piRNA     | piR-33065                   | -0.55 | 4.52  | 2.42 | 0.12 | 0.88 |
| mir-3p    | hsa-miR-625-3p              | -0.53 | 4.68  | 2.41 | 0.12 | 0.88 |
| scRNA     | HY1-L26                     | 0.57  | 2.97  | 2.41 | 0.12 | 0.88 |
| mir-5p3pr | hsa-miR-1976                | 0.83  | 1.89  | 2.41 | 0.12 | 0.88 |
| scRNA     | HY1-L277                    | 0.66  | 3.60  | 2.40 | 0.12 | 0.88 |
| piRNA     | piR-33468                   | 1.04  | 1.61  | 2.40 | 0.12 | 0.88 |
| mir-5p    | hsa-miR-4746-5p             | 0.95  | 1.73  | 2.40 | 0.12 | 0.88 |
| tRNA      | chr2.tRNA2-TyrGTA           | -0.96 | 1.69  | 2.39 | 0.12 | 0.88 |
| scRNA     | BC200-L54                   | -0.60 | 4.73  | 2.38 | 0.12 | 0.88 |
| piRNA     | piR-53129                   | 1.08  | 1.55  | 2.38 | 0.12 | 0.88 |
| rRNA      | LSU-rRNA_Hsa-L355           | -0.63 | 3.31  | 2.36 | 0.12 | 0.89 |
| piRNA     | piR-36074                   | 0.57  | 4.27  | 2.35 | 0.13 | 0.89 |

|           |                           |       |       |      |      |      |
|-----------|---------------------------|-------|-------|------|------|------|
| tRNA      | chr6.tRNA130-GlnTTG       | 0.69  | 3.35  | 2.33 | 0.13 | 0.89 |
| snRNA     | U2-L1058                  | 0.74  | 6.70  | 2.32 | 0.13 | 0.90 |
| scRNA     | HY1-L443                  | 0.41  | 7.16  | 2.31 | 0.13 | 0.90 |
| snoRNA    | U38B                      | -0.84 | 2.95  | 2.29 | 0.13 | 0.90 |
| snRNA     | U2-L765                   | -0.93 | 2.07  | 2.29 | 0.13 | 0.90 |
| snRNA     | U2-L240                   | 0.95  | 3.38  | 2.28 | 0.13 | 0.90 |
| mir-5p    | hsa-miR-3606-5p           | 1.10  | 2.63  | 2.25 | 0.13 | 0.91 |
| snoRNA    | U105                      | -0.93 | 2.35  | 2.25 | 0.13 | 0.91 |
| scRNA     | HY1-L243                  | 0.42  | 6.54  | 2.21 | 0.14 | 0.92 |
| rRNA      | LSU-rRNA_Hsa-L163         | -0.75 | 9.10  | 2.20 | 0.14 | 0.92 |
| snoRNA    | U59B                      | -0.71 | 7.06  | 2.20 | 0.14 | 0.92 |
| tRNA      | chr6.tRNA30-ProCGG        | -0.42 | 10.88 | 2.18 | 0.14 | 0.92 |
| tRNA      | chrX.tRNA4-ValTAC         | -0.56 | 5.20  | 2.17 | 0.14 | 0.92 |
| snoRNA    | U95                       | -0.55 | 6.95  | 2.16 | 0.14 | 0.92 |
| scRNA     | HY4-L96                   | -0.46 | 3.68  | 2.16 | 0.14 | 0.92 |
| snRNA     | U2-L63                    | -0.72 | 2.16  | 2.15 | 0.14 | 0.92 |
| piRNA     | piR-31447                 | -0.97 | 1.47  | 2.15 | 0.14 | 0.92 |
| tRNA      | chr16.tRNA29-ProAGG       | -0.62 | 2.96  | 2.14 | 0.14 | 0.92 |
| snoRNA    | HBI-115                   | -1.01 | 2.00  | 2.14 | 0.14 | 0.92 |
| rRNA      | LSU-rRNA_Hsa-L275         | 0.59  | 5.54  | 2.12 | 0.15 | 0.92 |
| piRNA     | piR-44984-L6              | 0.76  | 2.42  | 2.10 | 0.15 | 0.92 |
| scRNA     | BC200-L85                 | -0.88 | 1.96  | 2.09 | 0.15 | 0.92 |
| snoRNA    | U18C                      | -1.10 | 1.82  | 2.08 | 0.15 | 0.92 |
| snRNA     | U2-L166                   | -1.37 | 3.45  | 2.07 | 0.15 | 0.92 |
| snRNA     | U6-L1561                  | 1.12  | 2.12  | 2.06 | 0.15 | 0.92 |
| tRF3      | chr18.tRNA1-GluCTC-tRF3   | 1.22  | 2.27  | 2.06 | 0.15 | 0.92 |
| mir-5p3pr | hsa-miR-4472-L2           | 0.83  | 1.83  | 2.05 | 0.15 | 0.92 |
| mir-3p    | hsa-miR-495-3p            | 0.81  | 2.88  | 2.05 | 0.15 | 0.92 |
| snoRNA    | U84                       | -0.88 | 2.10  | 2.05 | 0.15 | 0.92 |
| rRNA      | 5S-L78                    | -0.58 | 2.70  | 2.05 | 0.15 | 0.92 |
| rRNA      | LSU-rRNA_Hsa-L257         | -0.71 | 4.58  | 2.04 | 0.15 | 0.92 |
| mir-5p    | hsa-miR-625-5p            | -0.80 | 2.07  | 2.02 | 0.16 | 0.92 |
| snRNA     | U14-L3                    | -1.01 | 1.49  | 2.01 | 0.16 | 0.92 |
| scRNA     | BC200-L49                 | -0.54 | 4.36  | 2.01 | 0.16 | 0.92 |
| tRF5      | chrX.tRNA1-PseudoTTG-tRF5 | -0.68 | 2.77  | 2.01 | 0.16 | 0.92 |
| piRNA     | piR-31986                 | -0.53 | 8.37  | 2.00 | 0.16 | 0.92 |
| tRF3      | chr6.tRNA36-ArgACG-tRF3   | 0.69  | 4.47  | 1.99 | 0.16 | 0.92 |
| mir-5p3pr | hsa-miR-1294              | -1.02 | 1.62  | 1.98 | 0.16 | 0.92 |
| scRNA     | BC200-L116                | 0.87  | 2.42  | 1.98 | 0.16 | 0.92 |
| snoRNA    | U26                       | -0.57 | 8.56  | 1.98 | 0.16 | 0.92 |
| rRNA      | 5S-L112                   | -0.37 | 10.83 | 1.97 | 0.16 | 0.92 |
| scRNA     | HY3-L120                  | 0.68  | 2.34  | 1.97 | 0.16 | 0.92 |
| scRNA     | BC200-L164                | 0.74  | 2.30  | 1.97 | 0.16 | 0.92 |

|           |                          |       |      |      |      |      |
|-----------|--------------------------|-------|------|------|------|------|
| tRNA      | chr17.tRNA23-ArgCCG      | 0.54  | 3.40 | 1.96 | 0.16 | 0.92 |
| rRNA      | 5S-L1071                 | -0.65 | 1.54 | 1.96 | 0.16 | 0.92 |
| scRNA     | HY4-L116                 | -0.47 | 3.88 | 1.95 | 0.16 | 0.92 |
| tRNA      | chr1.tRNA4-GlyCCC        | -0.47 | 5.56 | 1.94 | 0.16 | 0.92 |
| tRNA      | chr5.tRNA22-AspGTC       | 1.10  | 1.97 | 1.93 | 0.16 | 0.92 |
| mir-5p    | hsa-miR-32-5p            | -0.51 | 3.62 | 1.92 | 0.17 | 0.92 |
| scRNA     | HY4-L3                   | -0.52 | 2.42 | 1.92 | 0.17 | 0.92 |
| mir-5p    | hsa-miR-125a-5p          | 0.55  | 4.98 | 1.92 | 0.17 | 0.92 |
| piRNA     | piR-44716                | -2.49 | 4.74 | 1.91 | 0.17 | 0.92 |
| snoRNA    | HBII-316                 | -1.06 | 2.03 | 1.91 | 0.17 | 0.92 |
| snRNA     | U2-L481                  | -1.01 | 1.44 | 1.91 | 0.17 | 0.92 |
| tRNA      | chr16.tRNA17-LeuCAG      | -0.51 | 3.37 | 1.91 | 0.17 | 0.92 |
| rRNA      | LSU-rRNA_Hsa-L93         | 0.40  | 7.67 | 1.91 | 0.17 | 0.92 |
| mir-3p    | hsa-miR-140-3p           | -0.37 | 9.02 | 1.91 | 0.17 | 0.92 |
| mir-3p    | hsa-miR-21-3p            | 0.84  | 1.95 | 1.90 | 0.17 | 0.92 |
| snoRNA    | HBII-251                 | -0.95 | 3.81 | 1.90 | 0.17 | 0.92 |
| tRF5      | chr6.tRNA109-PheGAA-tRF5 | -0.95 | 2.26 | 1.89 | 0.17 | 0.92 |
| mir-3p    | hsa-miR-10b-3p           | -0.85 | 1.70 | 1.89 | 0.17 | 0.92 |
| snoRNA    | U96a                     | -0.73 | 3.47 | 1.89 | 0.17 | 0.92 |
| snoRNA    | U94                      | -0.82 | 3.12 | 1.87 | 0.17 | 0.92 |
| snRNA     | U2-L205                  | -0.96 | 1.72 | 1.87 | 0.17 | 0.92 |
| mir-5p    | hsa-miR-3173-5p          | -0.86 | 2.41 | 1.87 | 0.17 | 0.92 |
| scRNA     | HY4-L44                  | 0.72  | 1.59 | 1.86 | 0.17 | 0.92 |
| mir-3p    | hsa-let-7d-3p            | 0.44  | 6.61 | 1.86 | 0.17 | 0.92 |
| mir-3p    | hsa-miR-200b-3p          | 0.81  | 1.87 | 1.86 | 0.17 | 0.92 |
| snoRNA    | SNORD125                 | -0.98 | 1.68 | 1.85 | 0.17 | 0.93 |
| rRNA      | LSU-rRNA_Hsa-L124        | 0.65  | 2.33 | 1.84 | 0.18 | 0.93 |
| scRNA     | HY4-L109                 | 0.60  | 2.11 | 1.83 | 0.18 | 0.93 |
| mir-3p    | hsa-miR-374b-3p          | 0.74  | 2.49 | 1.83 | 0.18 | 0.93 |
| scRNA     | BC200-L151               | 0.71  | 2.08 | 1.82 | 0.18 | 0.93 |
| scRNA     | HY1-L223                 | 0.37  | 6.19 | 1.82 | 0.18 | 0.93 |
| mir-5p    | hsa-miR-193a-5p          | 0.46  | 5.17 | 1.80 | 0.18 | 0.93 |
| mir-5p3pr | hsa-miR-378f             | 0.61  | 1.69 | 1.79 | 0.18 | 0.93 |
| snRNA     | U3-L79                   | -0.66 | 3.27 | 1.79 | 0.18 | 0.93 |
| snRNA     | U1-L24                   | -0.61 | 2.67 | 1.79 | 0.18 | 0.93 |
| scRNA     | BC200-L73                | -0.67 | 2.27 | 1.77 | 0.18 | 0.93 |
| snoRNA    | mgU6-77                  | -0.67 | 4.50 | 1.77 | 0.18 | 0.93 |
| mir-3p    | hsa-miR-629-3p           | 0.91  | 1.42 | 1.77 | 0.18 | 0.93 |
| mir-5p3pr | hsa-miR-107              | 0.79  | 1.72 | 1.77 | 0.18 | 0.93 |
| mir-5p    | hsa-miR-181b-5p-L2       | -0.34 | 6.05 | 1.76 | 0.18 | 0.93 |
| rRNA      | 5S-L115                  | -0.63 | 1.96 | 1.75 | 0.19 | 0.93 |
| piRNA     | piR-36741-L2             | -0.86 | 1.62 | 1.74 | 0.19 | 0.93 |
| snoRNA    | U64                      | -0.77 | 2.08 | 1.74 | 0.19 | 0.93 |

|           |                           |       |       |      |      |      |
|-----------|---------------------------|-------|-------|------|------|------|
| scRNA     | HY1-L114                  | 0.50  | 3.94  | 1.72 | 0.19 | 0.93 |
| rRNA      | 5S-L356                   | 0.41  | 5.32  | 1.72 | 0.19 | 0.93 |
| tRF3      | chr12.tRNA7-AspGTC-tRF3   | -0.99 | 1.65  | 1.71 | 0.19 | 0.93 |
| tRNA      | chr6.tRNA15-TyrGTA        | 0.61  | 5.52  | 1.70 | 0.19 | 0.93 |
| mir-5p3pr | hsa-miR-328               | 0.55  | 4.07  | 1.69 | 0.19 | 0.93 |
| tRF5      | chr5.tRNA22-AspGTC-tRF5   | 0.81  | 2.30  | 1.67 | 0.20 | 0.93 |
| scRNA     | HY1-L300                  | 0.65  | 2.19  | 1.67 | 0.20 | 0.93 |
| rRNA      | 5S-L1196                  | 0.92  | 2.22  | 1.65 | 0.20 | 0.93 |
| rRNA      | 5S-L997                   | 1.00  | 1.97  | 1.65 | 0.20 | 0.93 |
| piRNA     | piR-61298                 | -1.25 | 1.91  | 1.65 | 0.20 | 0.93 |
| mir-5p3pr | hsa-miR-942               | 0.58  | 3.31  | 1.65 | 0.20 | 0.93 |
| snoRNA    | U33                       | -0.51 | 4.23  | 1.64 | 0.20 | 0.93 |
| tRNA      | chr16.tRNA19-GlyGCC       | 1.06  | 1.88  | 1.64 | 0.20 | 0.93 |
| rRNA      | 5S-L282                   | 0.85  | 1.46  | 1.64 | 0.20 | 0.93 |
| tRNA      | chr1.tRNA72-AspGTC        | 0.49  | 7.23  | 1.63 | 0.20 | 0.93 |
| snRNA     | U4-L24                    | -0.88 | 1.61  | 1.63 | 0.20 | 0.93 |
| mir-5p    | hsa-miR-224-5p            | -0.42 | 6.88  | 1.62 | 0.20 | 0.93 |
| snRNA     | U2-L709                   | -0.65 | 3.25  | 1.61 | 0.20 | 0.93 |
| tRNA      | chr17.tRNA20-MetCAT       | 0.97  | 1.87  | 1.61 | 0.20 | 0.93 |
| scRNA     | HY1-L356                  | 0.44  | 4.04  | 1.60 | 0.21 | 0.93 |
| scRNA     | HY1-L192                  | 0.36  | 5.99  | 1.59 | 0.21 | 0.93 |
| scRNA     | HY1-L260                  | 0.39  | 4.88  | 1.57 | 0.21 | 0.93 |
| scRNA     | HY5                       | 0.76  | 1.57  | 1.57 | 0.21 | 0.93 |
| mir-5p3pr | hsa-miR-1290              | 1.18  | 2.06  | 1.57 | 0.21 | 0.93 |
| tRNA      | chr6.tRNA129-MetCAT       | -0.52 | 5.33  | 1.56 | 0.21 | 0.93 |
| mir-5p    | hsa-miR-106b-5p           | -0.43 | 3.53  | 1.56 | 0.21 | 0.93 |
| scRNA     | HY1-L67                   | 0.38  | 6.00  | 1.55 | 0.21 | 0.93 |
| scRNA     | HY1-L212                  | 0.57  | 2.69  | 1.54 | 0.21 | 0.93 |
| mir-3p    | hsa-miR-3177-3p           | 0.75  | 1.68  | 1.53 | 0.22 | 0.93 |
| tRNA      | chr6.tRNA83-LeuTAA        | 0.61  | 2.22  | 1.53 | 0.22 | 0.93 |
| snoRNA    | ACA34                     | -0.57 | 4.14  | 1.52 | 0.22 | 0.93 |
| tRF5      | chr3.tRNA9-PseudoTTG-tRF5 | -0.85 | 1.99  | 1.52 | 0.22 | 0.93 |
| tRNA      | chr12.tRNA6-TrpCCA        | 0.53  | 2.86  | 1.52 | 0.22 | 0.93 |
| piRNA     | piR-37525                 | -0.93 | 1.54  | 1.52 | 0.22 | 0.93 |
| scRNA     | HY1-L239                  | 0.40  | 4.37  | 1.51 | 0.22 | 0.93 |
| scRNA     | HY5-L9                    | -0.67 | 1.40  | 1.51 | 0.22 | 0.93 |
| rRNA      | 5S-L489                   | -1.62 | 5.18  | 1.50 | 0.22 | 0.93 |
| mir-5p3pr | hsa-miR-95                | -0.48 | 2.72  | 1.50 | 0.22 | 0.93 |
| mir-5p3pr | hsa-miR-210               | 0.75  | 2.15  | 1.49 | 0.22 | 0.93 |
| rRNA      | LSU-rRNA_Hsa-L350         | 0.32  | 10.47 | 1.49 | 0.22 | 0.93 |
| snoRNA    | U45A                      | -0.58 | 4.15  | 1.49 | 0.22 | 0.93 |
| scRNA     | HY3-L140                  | 0.61  | 2.64  | 1.48 | 0.22 | 0.93 |
| snRNA     | U2-L288                   | -0.57 | 2.57  | 1.48 | 0.22 | 0.93 |



|          |                         |       |      |      |      |      |
|----------|-------------------------|-------|------|------|------|------|
| tRNA     | chr16.tRNA2-ArgCCT      | 0.55  | 3.09 | 1.48 | 0.22 | 0.93 |
| scRNA    | BC200-L100              | 1.23  | 1.69 | 1.47 | 0.22 | 0.93 |
| mir-3p   | hsa-miR-200a-3p         | -0.65 | 2.22 | 1.47 | 0.23 | 0.93 |
| mir-5p   | hsa-miR-185-5p          | -0.39 | 8.24 | 1.46 | 0.23 | 0.93 |
| scRNA    | BC200-L159              | -0.78 | 1.51 | 1.45 | 0.23 | 0.93 |
| rRNA     | LSU-rRNA_Hsa-L203       | 0.36  | 5.91 | 1.45 | 0.23 | 0.93 |
| scRNA    | BC200-L37               | 0.35  | 6.33 | 1.45 | 0.23 | 0.93 |
| rRNA     | LSU-rRNA_Hsa-L409       | 0.41  | 4.71 | 1.44 | 0.23 | 0.93 |
| scRNA    | BC200-L93               | 0.98  | 1.59 | 1.44 | 0.23 | 0.93 |
| tRNA     | chr6.tRNA100-LeuCAA     | 0.49  | 3.49 | 1.44 | 0.23 | 0.93 |
| scRNA    | HY1-L159                | 0.45  | 4.34 | 1.44 | 0.23 | 0.93 |
| snoRNA   | U25                     | -0.68 | 5.20 | 1.44 | 0.23 | 0.93 |
| tRNA     | chr1.tRNA33-Pseudo???   | -0.46 | 3.32 | 1.44 | 0.23 | 0.93 |
| scRNA    | HY4-L149                | -0.60 | 1.76 | 1.43 | 0.23 | 0.93 |
| tRNA     | chr1.tRNA38-LeuCAG      | 0.63  | 3.68 | 1.43 | 0.23 | 0.93 |
| piRNA    | piR-31987               | -0.45 | 6.33 | 1.43 | 0.23 | 0.93 |
| tRNA     | chr6.tRNA168-TrpCCA     | -0.76 | 2.05 | 1.42 | 0.23 | 0.93 |
| snoRNA   | U102                    | -0.47 | 7.38 | 1.42 | 0.23 | 0.93 |
| rRNA     | LSU-rRNA_Hsa-L367       | 0.29  | 7.90 | 1.42 | 0.23 | 0.93 |
| scRNA    | HY4-L129                | 0.40  | 3.45 | 1.42 | 0.23 | 0.93 |
| tRNA     | chr1.tRNA60-PseudoTAA   | -0.49 | 3.73 | 1.42 | 0.23 | 0.93 |
| snRNA    | U2-L887                 | 0.53  | 6.32 | 1.41 | 0.23 | 0.93 |
| scRNA    | HY1-L175                | 0.82  | 2.06 | 1.41 | 0.23 | 0.93 |
| mir-5p3p | hsa-miR-3609            | -0.73 | 2.87 | 1.41 | 0.24 | 0.93 |
| rRNA     | LSU-rRNA_Hsa-L102       | 0.56  | 3.17 | 1.40 | 0.24 | 0.93 |
| snoRNA   | HBII-289                | -0.41 | 7.18 | 1.40 | 0.24 | 0.93 |
| snRNA    | U1-L17                  | -1.02 | 1.83 | 1.40 | 0.24 | 0.93 |
| scRNA    | HY1-L137                | 0.42  | 4.44 | 1.40 | 0.24 | 0.93 |
| mir-3p   | hsa-miR-29a-3p          | -0.34 | 5.96 | 1.40 | 0.24 | 0.93 |
| snoRNA   | U58C                    | -0.70 | 3.37 | 1.39 | 0.24 | 0.93 |
| scRNA    | HY3-L82                 | -0.43 | 3.20 | 1.39 | 0.24 | 0.93 |
| tRNA     | chr6.tRNA84-GlnTTG      | 0.85  | 1.52 | 1.39 | 0.24 | 0.93 |
| scRNA    | HY3-L34                 | 0.65  | 3.61 | 1.39 | 0.24 | 0.93 |
| rRNA     | 5S-L1014                | -0.71 | 1.63 | 1.38 | 0.24 | 0.93 |
| snRNA    | U1-L4                   | 0.47  | 8.27 | 1.37 | 0.24 | 0.93 |
| rRNA     | 5S-L1255                | 0.59  | 1.70 | 1.37 | 0.24 | 0.93 |
| mir-3p   | hsa-miR-576-3p          | -0.34 | 4.04 | 1.37 | 0.24 | 0.93 |
| tRNA     | chr1.tRNA5-GluTTC       | 0.53  | 5.89 | 1.36 | 0.24 | 0.93 |
| tRF5     | chr6.tRNA56-PheGAA-tRF5 | 0.84  | 1.38 | 1.36 | 0.24 | 0.93 |
| rRNA     | 5S-L1178                | -0.56 | 1.51 | 1.36 | 0.24 | 0.93 |
| scRNA    | HY1-L184                | 0.38  | 3.77 | 1.35 | 0.24 | 0.93 |
| snoRNA   | mgH28S-2411             | -0.54 | 6.56 | 1.35 | 0.24 | 0.93 |
| piRNA    | piR-57516               | 0.41  | 5.25 | 1.35 | 0.25 | 0.93 |

|           |                            |       |       |      |      |      |
|-----------|----------------------------|-------|-------|------|------|------|
| mir-5p3pr | hsa-miR-548k               | 0.71  | 1.89  | 1.35 | 0.25 | 0.93 |
| snoRNA    | U99                        | -0.64 | 3.13  | 1.34 | 0.25 | 0.93 |
| scRNA     | HY1-L191                   | 0.41  | 3.51  | 1.34 | 0.25 | 0.93 |
| scRNA     | HY1-L434                   | 0.35  | 6.45  | 1.34 | 0.25 | 0.93 |
| snoRNA    | U92                        | -0.51 | 2.16  | 1.34 | 0.25 | 0.93 |
| snoRNA    | U81                        | -0.58 | 6.27  | 1.33 | 0.25 | 0.93 |
| mir-5p3pr | hsa-miR-1301               | 0.41  | 4.06  | 1.31 | 0.25 | 0.93 |
| scRNA     | HY1-L295                   | 0.38  | 4.37  | 1.31 | 0.25 | 0.93 |
| mir-5p    | hsa-miR-148a-5p            | 0.40  | 4.17  | 1.31 | 0.25 | 0.93 |
| scRNA     | HY1-L269                   | -0.53 | 1.87  | 1.31 | 0.25 | 0.93 |
| piRNA     | piR-31935                  | 0.41  | 4.57  | 1.30 | 0.25 | 0.93 |
| rRNA      | LSU-rRNA_Hsa-L150          | 0.40  | 3.40  | 1.30 | 0.25 | 0.93 |
| snoRNA    | U66                        | -0.77 | 1.79  | 1.30 | 0.25 | 0.93 |
| tRNA      | chr1.tRNA15-GlnCTG         | 0.46  | 2.98  | 1.30 | 0.25 | 0.93 |
| piRNA     | piR-35411-L4               | 0.59  | 2.53  | 1.29 | 0.26 | 0.93 |
| mir-3p    | hsa-let-7i-3p              | -0.64 | 1.50  | 1.29 | 0.26 | 0.93 |
| tRNA      | chr19.tRNA2-GlyTCC         | -0.44 | 4.14  | 1.29 | 0.26 | 0.93 |
| rRNA      | LSU-rRNA_Hsa-L18           | -0.47 | 5.98  | 1.29 | 0.26 | 0.93 |
| snRNA     | U1-L63                     | -0.57 | 2.53  | 1.29 | 0.26 | 0.93 |
| snoRNA    | HBII-239                   | -0.46 | 4.71  | 1.29 | 0.26 | 0.93 |
| snoRNA    | U16                        | -0.67 | 2.75  | 1.29 | 0.26 | 0.93 |
| mir-5p    | hsa-miR-132-5p             | -0.64 | 2.49  | 1.28 | 0.26 | 0.93 |
| tRF3      | chr6.tRNA61-MetCAT-tRF3    | 0.90  | 2.23  | 1.26 | 0.26 | 0.93 |
| tRNA      | chr6.tRNA75-MetCAT         | 0.96  | 1.36  | 1.26 | 0.26 | 0.93 |
| scRNA     | HY4-L89                    | 0.37  | 8.76  | 1.25 | 0.26 | 0.93 |
| tRNA      | chr11.tRNA8-SerGCT         | -0.45 | 4.09  | 1.25 | 0.26 | 0.93 |
| rRNA      | LSU-rRNA_Hsa-L174          | 0.65  | 1.61  | 1.24 | 0.26 | 0.93 |
| scRNA     | HY4-L130                   | 0.26  | 14.43 | 1.24 | 0.26 | 0.93 |
| mir-5p    | hsa-miR-144-5p             | 0.44  | 5.62  | 1.24 | 0.26 | 0.93 |
| rRNA      | 5S-L583                    | 0.92  | 2.68  | 1.24 | 0.26 | 0.93 |
| tRF3      | chr7.tRNA26-PseudoTTG-tRF3 | -0.61 | 2.24  | 1.24 | 0.27 | 0.93 |
| snoRNA    | U82                        | -0.58 | 5.05  | 1.24 | 0.27 | 0.93 |
| rRNA      | LSU-rRNA_Hsa-L19           | 0.57  | 2.10  | 1.24 | 0.27 | 0.93 |
| scRNA     | HY1-L179                   | 0.32  | 6.39  | 1.23 | 0.27 | 0.93 |
| rRNA      | LSU-rRNA_Hsa-L63           | 1.17  | 4.97  | 1.22 | 0.27 | 0.93 |
| scRNA     | HY1-L292                   | 0.34  | 5.48  | 1.22 | 0.27 | 0.93 |
| rRNA      | LSU-rRNA_Hsa-L389          | 0.39  | 10.71 | 1.22 | 0.27 | 0.93 |
| mir-5p    | hsa-miR-10a-5p             | -0.32 | 8.93  | 1.21 | 0.27 | 0.93 |
| tRNA      | chr6.tRNA166-AlaAGC        | -0.76 | 1.77  | 1.21 | 0.27 | 0.93 |
| rRNA      | LSU-rRNA_Hsa-L304          | -0.67 | 2.50  | 1.21 | 0.27 | 0.93 |
| mir-3p    | hsa-miR-132-3p             | 0.71  | 1.92  | 1.21 | 0.27 | 0.93 |
| piRNA     | piR-30890                  | -0.58 | 3.30  | 1.21 | 0.27 | 0.93 |
| tRF5      | chr20.tRNA7-PseudoCTC-tRF5 | 0.76  | 1.40  | 1.21 | 0.27 | 0.93 |

|        |                          |       |       |      |      |      |
|--------|--------------------------|-------|-------|------|------|------|
| snoRNA | HBII-85-15               | -0.97 | 1.65  | 1.21 | 0.27 | 0.93 |
| rRNA   | LSU-rRNA_Hsa-L220        | 0.48  | 4.41  | 1.20 | 0.27 | 0.93 |
| scRNA  | HY1-L352                 | 0.80  | 1.78  | 1.19 | 0.27 | 0.93 |
| tRNA   | chr1.tRNA9-ArgTCT        | -0.51 | 2.50  | 1.19 | 0.28 | 0.93 |
| snoRNA | U87                      | -0.87 | 1.65  | 1.19 | 0.28 | 0.93 |
| piRNA  | piR-61646-L2             | -0.37 | 8.65  | 1.19 | 0.28 | 0.93 |
| scRNA  | HY1-L287                 | 0.32  | 6.16  | 1.19 | 0.28 | 0.93 |
| snoRNA | HBII-166                 | -0.74 | 3.05  | 1.19 | 0.28 | 0.93 |
| mir-3p | hsa-miR-2355-3p          | 0.61  | 1.86  | 1.18 | 0.28 | 0.93 |
| scRNA  | HY4-L136                 | -0.57 | 2.51  | 1.18 | 0.28 | 0.93 |
| rRNA   | 5S-L1164                 | 0.51  | 2.08  | 1.18 | 0.28 | 0.93 |
| tRNA   | chr12.tRNA2-SerCGA       | 1.19  | 1.52  | 1.18 | 0.28 | 0.93 |
| scRNA  | HY3-L525                 | 0.66  | 1.38  | 1.17 | 0.28 | 0.93 |
| mir-3p | hsa-miR-26b-3p           | 0.68  | 2.34  | 1.17 | 0.28 | 0.93 |
| piRNA  | piR-35548-L3             | -0.60 | 2.78  | 1.17 | 0.28 | 0.93 |
| tRF3   | chr6.tRNA37-ValAAC-tRF3  | 0.53  | 12.93 | 1.16 | 0.28 | 0.93 |
| mir-3p | hsa-miR-3158-3p          | -0.45 | 3.71  | 1.16 | 0.28 | 0.93 |
| scRNA  | HY3-L272                 | 0.66  | 1.38  | 1.16 | 0.28 | 0.93 |
| rRNA   | 5S-L389                  | -0.63 | 1.35  | 1.16 | 0.28 | 0.93 |
| tRNA   | chr11.tRNA12-ProTGG      | -0.35 | 8.16  | 1.15 | 0.28 | 0.93 |
| snoRNA | U42B                     | -0.71 | 4.22  | 1.15 | 0.28 | 0.93 |
| tRF5   | chr17.tRNA21-ArgCCT-tRF5 | -0.73 | 1.46  | 1.15 | 0.28 | 0.93 |
| rRNA   | 5S-L530                  | 0.69  | 5.17  | 1.15 | 0.28 | 0.93 |
| snRNA  | U5-L22                   | 0.86  | 1.98  | 1.15 | 0.28 | 0.93 |
| piRNA  | piR-36494                | 0.88  | 2.00  | 1.14 | 0.29 | 0.93 |
| scRNA  | HY4-L11                  | 0.81  | 1.48  | 1.14 | 0.29 | 0.93 |
| mir-5p | hsa-miR-193b-5p          | -0.62 | 2.08  | 1.13 | 0.29 | 0.93 |
| tRNA   | chr16.tRNA22-MetCAT      | 0.51  | 3.03  | 1.13 | 0.29 | 0.93 |
| piRNA  | piR-31638                | -0.69 | 1.74  | 1.13 | 0.29 | 0.93 |
| rRNA   | 5S-L1234                 | 0.34  | 5.10  | 1.13 | 0.29 | 0.93 |
| tRNA   | chr12.tRNA5-AspGTC       | 0.40  | 4.66  | 1.12 | 0.29 | 0.93 |
| snoRNA | U97                      | 0.84  | 1.93  | 1.12 | 0.29 | 0.93 |
| rRNA   | LSU-rRNA_Hsa-L43         | 0.64  | 1.53  | 1.12 | 0.29 | 0.93 |
| tRNA   | chr11.tRNA13-PheGAA      | 0.64  | 3.60  | 1.11 | 0.29 | 0.93 |
| mir-3p | hsa-miR-142-3p           | 0.28  | 5.68  | 1.11 | 0.29 | 0.93 |
| snoRNA | HBI-100                  | -0.33 | 4.44  | 1.11 | 0.29 | 0.93 |
| tRNA   | chr1.tRNA128-LysCTT      | 0.49  | 3.24  | 1.10 | 0.29 | 0.93 |
| scRNA  | HY4-L134                 | -0.56 | 2.51  | 1.10 | 0.29 | 0.93 |
| rRNA   | 5S-L986                  | 0.56  | 1.69  | 1.10 | 0.29 | 0.93 |
| piRNA  | piR-60577-L3             | 0.31  | 7.08  | 1.10 | 0.30 | 0.93 |
| mir-5p | hsa-let-7g-5p            | -0.27 | 11.06 | 1.09 | 0.30 | 0.93 |
| scRNA  | BC200-L9                 | -0.38 | 2.83  | 1.09 | 0.30 | 0.93 |
| mir-5p | hsa-let-7i-5p            | -0.23 | 12.19 | 1.09 | 0.30 | 0.93 |

|        |                     |       |       |      |      |      |
|--------|---------------------|-------|-------|------|------|------|
| snoRNA | U58A                | -0.50 | 5.02  | 1.09 | 0.30 | 0.93 |
| snRNA  | U2-L550             | 0.86  | 2.12  | 1.08 | 0.30 | 0.93 |
| tRNA   | chr17.tRNA14-ThrCGT | 0.74  | 1.87  | 1.08 | 0.30 | 0.93 |
| scRNA  | BC200-L28           | 0.62  | 2.06  | 1.08 | 0.30 | 0.93 |
| mir-3p | hsa-miR-3529-3p     | -0.26 | 7.65  | 1.07 | 0.30 | 0.93 |
| scRNA  | BC200-L23           | -0.52 | 3.06  | 1.07 | 0.30 | 0.93 |
| scRNA  | BC200-L155          | -0.52 | 2.70  | 1.07 | 0.30 | 0.93 |
| snRNA  | U17                 | -0.71 | 1.81  | 1.07 | 0.30 | 0.93 |
| scRNA  | BC200-L129          | 0.68  | 2.19  | 1.07 | 0.30 | 0.93 |
| tRNA   | chr14.tRNA8-CysGCA  | 0.86  | 4.27  | 1.06 | 0.30 | 0.93 |
| snoRNA | U8-L17              | 0.62  | 2.67  | 1.06 | 0.30 | 0.93 |
| rRNA   | LSU-rRNA_Hsa-L378   | -0.66 | 2.46  | 1.06 | 0.30 | 0.93 |
| snRNA  | U3-L74              | -0.70 | 2.45  | 1.06 | 0.30 | 0.93 |
| rRNA   | 5S-L99              | -0.29 | 8.58  | 1.06 | 0.30 | 0.93 |
| mir-5p | hsa-miR-374a-5p     | -0.44 | 2.91  | 1.05 | 0.30 | 0.93 |
| rRNA   | 5S-L1091            | -0.54 | 1.37  | 1.05 | 0.30 | 0.93 |
| scRNA  | HY4-L99             | 0.56  | 1.47  | 1.05 | 0.30 | 0.93 |
| scRNA  | HY1-L430            | 0.72  | 1.34  | 1.05 | 0.31 | 0.93 |
| mir-3p | hsa-miR-505-3p      | 0.56  | 2.00  | 1.04 | 0.31 | 0.94 |
| rRNA   | LSU-rRNA_Hsa-L67    | -0.68 | 3.16  | 1.04 | 0.31 | 0.94 |
| snoRNA | U45C                | -0.59 | 2.62  | 1.04 | 0.31 | 0.94 |
| snoRNA | HBII-85-3           | -0.78 | 2.57  | 1.04 | 0.31 | 0.94 |
| mir-3p | hsa-miR-148b-3p     | -0.25 | 8.62  | 1.03 | 0.31 | 0.94 |
| mir-3p | hsa-miR-223-3p      | -0.39 | 7.30  | 1.03 | 0.31 | 0.94 |
| rRNA   | LSU-rRNA_Hsa-L381   | -0.58 | 2.74  | 1.02 | 0.31 | 0.94 |
| rRNA   | SSU-rRNA_Hsa-L67    | -0.54 | 3.08  | 1.02 | 0.31 | 0.94 |
| snRNA  | U1-L71              | -0.35 | 5.05  | 1.02 | 0.31 | 0.94 |
| scRNA  | HY1-L208            | 0.39  | 3.29  | 1.01 | 0.31 | 0.94 |
| mir-5p | hsa-miR-423-5p      | 0.28  | 3.96  | 1.00 | 0.32 | 0.94 |
| scRNA  | BC200-L140          | 0.25  | 7.01  | 1.00 | 0.32 | 0.94 |
| mir-5p | hsa-miR-452-5p      | -0.68 | 1.74  | 1.00 | 0.32 | 0.94 |
| rRNA   | SSU-rRNA_Hsa-L72    | 0.22  | 14.26 | 1.00 | 0.32 | 0.94 |
| rRNA   | LSU-rRNA_Hsa-L211   | 0.58  | 1.63  | 1.00 | 0.32 | 0.94 |
| scRNA  | BC200-L96           | -0.44 | 5.30  | 0.99 | 0.32 | 0.94 |
| scRNA  | BC200-L134          | -0.68 | 1.43  | 0.99 | 0.32 | 0.94 |
| rRNA   | 5S-L104             | -0.27 | 10.61 | 0.99 | 0.32 | 0.94 |
| scRNA  | BC200-L11           | -0.65 | 1.53  | 0.98 | 0.32 | 0.94 |
| scRNA  | HY4-L103            | 0.40  | 4.44  | 0.98 | 0.32 | 0.94 |
| mir-3p | hsa-miR-30c-2-3p    | 0.81  | 1.38  | 0.97 | 0.32 | 0.94 |
| tRNA   | chr6.tRNA31-SerGCT  | 0.78  | 3.19  | 0.97 | 0.32 | 0.94 |
| mir-3p | hsa-miR-369-3p      | 0.67  | 1.38  | 0.97 | 0.33 | 0.94 |
| piRNA  | piR-36323-L3        | 0.52  | 2.88  | 0.96 | 0.33 | 0.94 |
| mir-3p | hsa-miR-30e-3p      | -0.23 | 8.45  | 0.96 | 0.33 | 0.94 |

|        |                     |       |       |      |      |      |
|--------|---------------------|-------|-------|------|------|------|
| snoRNA | HBII-382            | -0.80 | 2.17  | 0.96 | 0.33 | 0.94 |
| piRNA  | piR-35469           | 0.53  | 1.70  | 0.96 | 0.33 | 0.94 |
| mir-5p | hsa-miR-203a        | -0.84 | 2.28  | 0.95 | 0.33 | 0.94 |
| tRNA   | chr16.tRNA25-GlyGCC | 0.33  | 4.78  | 0.95 | 0.33 | 0.94 |
| tRNA   | chr1.tRNA116-GluCTC | 0.34  | 3.79  | 0.95 | 0.33 | 0.94 |
| scRNA  | HY4-L18             | 0.54  | 1.43  | 0.95 | 0.33 | 0.94 |
| scRNA  | HY3-L203            | 0.51  | 1.78  | 0.95 | 0.33 | 0.94 |
| mir-5p | hsa-miR-186-5p      | -0.31 | 6.23  | 0.95 | 0.33 | 0.94 |
| snRNA  | U3-L205             | -0.31 | 4.79  | 0.95 | 0.33 | 0.94 |
| rRNA   | SSU-rRNA_Hsa-L73    | 0.23  | 14.22 | 0.94 | 0.33 | 0.94 |
| rRNA   | 5S-L105             | 0.29  | 5.89  | 0.94 | 0.33 | 0.94 |
| snRNA  | U6-L1696            | -0.69 | 1.91  | 0.94 | 0.33 | 0.94 |
| snRNA  | U1-L47              | 0.51  | 1.98  | 0.94 | 0.33 | 0.94 |
| rRNA   | 5S-L803             | 0.25  | 7.74  | 0.93 | 0.33 | 0.94 |
| snoRNA | U49B                | -0.82 | 1.62  | 0.93 | 0.33 | 0.94 |
| snRNA  | U1-L78              | -0.62 | 1.40  | 0.93 | 0.33 | 0.94 |
| rRNA   | LSU-rRNA_Hsa-L375   | -0.33 | 10.09 | 0.93 | 0.33 | 0.94 |
| tRNA   | chr14.tRNA10-IleAAT | 0.64  | 1.41  | 0.92 | 0.34 | 0.94 |
| mir-5p | hsa-miR-654-5p      | 0.54  | 3.09  | 0.92 | 0.34 | 0.94 |
| snoRNA | HBII-82             | -0.87 | 2.14  | 0.92 | 0.34 | 0.94 |
| rRNA   | LSU-rRNA_Hsa-L236   | 0.58  | 1.43  | 0.92 | 0.34 | 0.94 |
| mir-5p | hsa-miR-3605-5p     | 0.51  | 2.60  | 0.92 | 0.34 | 0.94 |
| rRNA   | LSU-rRNA_Hsa-L41    | 0.80  | 1.50  | 0.91 | 0.34 | 0.94 |
| rRNA   | 5S-L233             | 0.45  | 2.20  | 0.91 | 0.34 | 0.94 |
| rRNA   | SSU-rRNA_Hsa-L10    | 0.23  | 11.45 | 0.90 | 0.34 | 0.95 |
| scRNA  | HY1-L174            | 0.59  | 1.36  | 0.90 | 0.34 | 0.95 |
| scRNA  | HY4-L152            | 0.31  | 7.32  | 0.90 | 0.34 | 0.95 |
| piRNA  | piR-35548-L2        | -0.36 | 7.18  | 0.89 | 0.34 | 0.95 |
| snRNA  | U3-L78              | -0.48 | 4.40  | 0.89 | 0.35 | 0.95 |
| mir-3p | hsa-miR-136-3p      | -0.51 | 2.62  | 0.89 | 0.35 | 0.95 |
| snoRNA | U32A                | -0.60 | 4.08  | 0.89 | 0.35 | 0.95 |
| mir-3p | hsa-miR-27b-3p      | -0.23 | 8.94  | 0.89 | 0.35 | 0.95 |
| mir-5p | hsa-miR-98-5p       | -0.28 | 6.17  | 0.88 | 0.35 | 0.95 |
| mir-5p | hsa-miR-100-5p      | -0.31 | 6.59  | 0.88 | 0.35 | 0.95 |
| scRNA  | BC200-L62           | -0.38 | 2.72  | 0.87 | 0.35 | 0.95 |
| mir-3p | hsa-miR-19a-3p      | 0.31  | 4.16  | 0.87 | 0.35 | 0.95 |
| rRNA   | LSU-rRNA_Hsa-L185   | -0.52 | 2.41  | 0.87 | 0.35 | 0.95 |
| mir-5p | hsa-miR-194-5p      | -0.31 | 4.46  | 0.87 | 0.35 | 0.95 |
| rRNA   | SSU-rRNA_Hsa-L74    | 0.34  | 6.51  | 0.87 | 0.35 | 0.95 |
| scRNA  | HY4-L34             | 0.49  | 1.71  | 0.86 | 0.35 | 0.95 |
| scRNA  | HY1-L393            | 0.52  | 1.73  | 0.86 | 0.35 | 0.95 |
| mir-5p | hsa-miR-139-5p      | 0.26  | 6.03  | 0.86 | 0.35 | 0.95 |
| rRNA   | 5S-L1217            | 0.51  | 1.70  | 0.86 | 0.36 | 0.95 |

|           |                       |       |      |      |      |      |
|-----------|-----------------------|-------|------|------|------|------|
| scRNA     | HY4-L61               | 0.28  | 5.54 | 0.85 | 0.36 | 0.95 |
| mir-5p3pr | hsa-miR-1-L2          | 0.40  | 4.82 | 0.85 | 0.36 | 0.95 |
| snoRNA    | U36A                  | -0.80 | 1.72 | 0.85 | 0.36 | 0.95 |
| snoRNA    | ACA44                 | -0.67 | 2.30 | 0.85 | 0.36 | 0.95 |
| scRNA     | HY1-L133              | 0.33  | 2.77 | 0.85 | 0.36 | 0.95 |
| mir-5p3pr | hsa-miR-410           | -0.70 | 1.74 | 0.84 | 0.36 | 0.95 |
| tRNA      | chr6.tRNA85-PseudoTTC | -0.38 | 4.59 | 0.84 | 0.36 | 0.95 |
| piRNA     | piR-33404             | -0.38 | 6.30 | 0.84 | 0.36 | 0.95 |
| scRNA     | BC200-L67             | -0.40 | 4.18 | 0.84 | 0.36 | 0.95 |
| snoRNA    | HBII-420              | -0.50 | 4.25 | 0.83 | 0.36 | 0.95 |
| mir-5p    | hsa-miR-20a-5p        | -0.31 | 7.17 | 0.83 | 0.36 | 0.95 |
| piRNA     | piR-41588             | -0.53 | 1.60 | 0.83 | 0.36 | 0.95 |
| piRNA     | piR-31115-L2          | 0.24  | 6.67 | 0.83 | 0.36 | 0.95 |
| mir-5p    | hsa-miR-342-5p        | -0.30 | 6.55 | 0.82 | 0.36 | 0.95 |
| rRNA      | 5S-L1067              | -0.34 | 2.57 | 0.82 | 0.36 | 0.95 |
| mir-5p    | hsa-miR-30c-5p        | 0.23  | 6.46 | 0.82 | 0.37 | 0.95 |
| piRNA     | piR-33151-L4          | -0.32 | 4.06 | 0.82 | 0.37 | 0.95 |
| mir-3p    | hsa-miR-411-3p        | -0.66 | 1.75 | 0.82 | 0.37 | 0.95 |
| snoRNA    | mgU2-19/30            | -0.31 | 3.71 | 0.82 | 0.37 | 0.95 |
| piRNA     | piR-33382             | -0.31 | 8.69 | 0.82 | 0.37 | 0.95 |
| rRNA      | LSU-rRNA_Hsa-L144     | 0.61  | 1.61 | 0.81 | 0.37 | 0.95 |
| piRNA     | piR-35413-L2          | 0.44  | 1.56 | 0.81 | 0.37 | 0.95 |
| mir-3p    | hsa-miR-374c-3p       | -0.39 | 2.90 | 0.81 | 0.37 | 0.95 |
| tRNA      | chr13.tRNA4-GluCTC    | -0.38 | 2.04 | 0.81 | 0.37 | 0.95 |
| piRNA     | piR-34535             | -0.41 | 5.56 | 0.80 | 0.37 | 0.95 |
| mir-5p    | hsa-miR-483-5p        | 0.43  | 4.02 | 0.80 | 0.37 | 0.95 |
| rRNA      | LSU-rRNA_Hsa-L143     | 0.26  | 5.07 | 0.79 | 0.37 | 0.95 |
| rRNA      | LSU-rRNA_Hsa-L31      | -0.38 | 7.70 | 0.79 | 0.37 | 0.95 |
| piRNA     | piR-62011             | 0.28  | 8.25 | 0.79 | 0.37 | 0.95 |
| mir-3p    | hsa-miR-1273g-3p      | 0.26  | 5.83 | 0.79 | 0.37 | 0.95 |
| mir-3p    | hsa-let-7f-2-3p       | 0.58  | 1.55 | 0.79 | 0.38 | 0.95 |
| mir-5p    | hsa-miR-28-5p         | -0.29 | 5.11 | 0.78 | 0.38 | 0.95 |
| scRNA     | HY1-L10               | 0.51  | 1.55 | 0.78 | 0.38 | 0.95 |
| rRNA      | LSU-rRNA_Hsa-L387     | 0.22  | 9.35 | 0.78 | 0.38 | 0.95 |
| snoRNA    | ACA66                 | -0.58 | 2.24 | 0.78 | 0.38 | 0.95 |
| snoRNA    | U83B                  | -0.47 | 2.68 | 0.78 | 0.38 | 0.95 |
| rRNA      | LSU-rRNA_Hsa-L188     | -0.50 | 1.82 | 0.77 | 0.38 | 0.95 |
| scRNA     | HY1-L259              | 0.27  | 5.48 | 0.77 | 0.38 | 0.96 |
| mir-3p    | hsa-miR-381-3p        | -0.43 | 4.43 | 0.77 | 0.38 | 0.96 |
| scRNA     | BC200-L38             | 0.81  | 1.58 | 0.76 | 0.38 | 0.96 |
| mir-3p    | hsa-miR-17-3p         | -0.54 | 1.53 | 0.76 | 0.38 | 0.96 |
| mir-5p3pr | hsa-miR-152           | -0.28 | 5.59 | 0.76 | 0.38 | 0.96 |
| mir-3p    | hsa-miR-500a-3p       | -0.32 | 3.32 | 0.76 | 0.38 | 0.96 |

|           |                             |       |       |      |      |      |
|-----------|-----------------------------|-------|-------|------|------|------|
| mir-3p    | hsa-miR-28-3p               | -0.21 | 7.13  | 0.75 | 0.39 | 0.96 |
| tRNA      | chr10.tRNA6-ValTAC          | -0.57 | 1.49  | 0.75 | 0.39 | 0.96 |
| mir-5p3pr | hsa-miR-133a                | 0.74  | 1.55  | 0.75 | 0.39 | 0.96 |
| piRNA     | piR-36412                   | -0.43 | 2.36  | 0.75 | 0.39 | 0.96 |
| mir-5p    | hsa-miR-3613-5p             | -0.31 | 4.64  | 0.74 | 0.39 | 0.96 |
| tRNA      | chr6.tRNA74-LeuCAA          | -0.43 | 2.43  | 0.74 | 0.39 | 0.96 |
| mir-3p    | hsa-miR-450a-3p             | 0.60  | 1.54  | 0.74 | 0.39 | 0.96 |
| mir-5p3pr | hsa-let-7c-L2               | -0.20 | 5.48  | 0.74 | 0.39 | 0.96 |
| mir-5p    | hsa-miR-21-5p               | -0.19 | 13.59 | 0.73 | 0.39 | 0.96 |
| scRNA     | HY4-L147                    | 0.20  | 9.21  | 0.73 | 0.39 | 0.96 |
| mir-5p    | hsa-miR-122-5p              | -0.40 | 9.88  | 0.73 | 0.39 | 0.96 |
| tRNA      | chr1.tRNA64-GluTTC          | -0.20 | 7.89  | 0.72 | 0.40 | 0.96 |
| rRNA      | LSU-rRNA_Hsa-L249           | 0.26  | 7.95  | 0.71 | 0.40 | 0.96 |
| rRNA      | 5S-L815                     | -0.36 | 2.57  | 0.71 | 0.40 | 0.96 |
| mir-5p3pr | hsa-miR-378d-L2             | 0.48  | 1.37  | 0.71 | 0.40 | 0.96 |
| mir-3p    | hsa-miR-195-3p              | 0.51  | 1.91  | 0.71 | 0.40 | 0.96 |
| mir-5p    | hsa-miR-192-5p              | -0.21 | 8.24  | 0.71 | 0.40 | 0.96 |
| mir-3p    | hsa-miR-125b-2-3p           | -0.61 | 1.53  | 0.70 | 0.40 | 0.96 |
| tRNA      | chr11.tRNA16-ValTAC         | -0.28 | 4.20  | 0.70 | 0.40 | 0.96 |
| piRNA     | piR-45195-L2                | -0.68 | 1.33  | 0.70 | 0.40 | 0.96 |
| mir-3p    | hsa-miR-19b-3p              | 0.33  | 4.04  | 0.70 | 0.40 | 0.96 |
| snRNA     | U6-L503                     | 0.61  | 1.31  | 0.70 | 0.40 | 0.96 |
| piRNA     | piR-31038                   | -0.25 | 9.22  | 0.70 | 0.40 | 0.96 |
| rRNA      | LSU-rRNA_Hsa-L266           | -0.47 | 3.17  | 0.70 | 0.40 | 0.96 |
| mir-3p    | hsa-miR-4732-3p             | 0.55  | 2.44  | 0.69 | 0.40 | 0.96 |
| snoRNA    | SNORD127                    | -0.51 | 4.77  | 0.69 | 0.40 | 0.96 |
| snoRNA    | HBII-295                    | -0.59 | 3.05  | 0.69 | 0.41 | 0.96 |
| scRNA     | HY4-L127                    | -0.21 | 11.00 | 0.69 | 0.41 | 0.96 |
| mir-3p    | hsa-miR-222-3p              | 0.26  | 8.33  | 0.69 | 0.41 | 0.96 |
| rRNA      | 5S-L113                     | -0.22 | 10.34 | 0.69 | 0.41 | 0.96 |
| mir-3p    | hsa-miR-1285-3p             | -0.33 | 3.54  | 0.68 | 0.41 | 0.96 |
| mir-5p3pr | hsa-miR-320c                | 0.24  | 4.43  | 0.68 | 0.41 | 0.96 |
| piRNA     | piR-58356                   | -0.30 | 5.40  | 0.68 | 0.41 | 0.96 |
| snoRNA    | U13-L162                    | -0.44 | 2.03  | 0.68 | 0.41 | 0.96 |
| scRNA     | HY1-L69                     | 0.28  | 4.11  | 0.68 | 0.41 | 0.96 |
| snoRNA    | U103B                       | -0.52 | 3.29  | 0.68 | 0.41 | 0.96 |
| tRNA      | chr16.tRNA16-LeuAAG         | 0.39  | 3.29  | 0.68 | 0.41 | 0.96 |
| rRNA      | 5S-L71                      | -0.45 | 1.74  | 0.67 | 0.41 | 0.96 |
| snoRNA    | U61                         | -0.38 | 5.55  | 0.67 | 0.41 | 0.96 |
| tRF5      | chr17.tRNA33-PseudoTTG-tRF5 | -0.32 | 5.92  | 0.67 | 0.41 | 0.96 |
| scRNA     | HY1-L342                    | -0.54 | 1.37  | 0.66 | 0.42 | 0.96 |
| scRNA     | HY1-L155                    | 0.36  | 2.69  | 0.66 | 0.42 | 0.96 |
| tRF3      | chr17.tRNA13-GlyCCC-tRF3    | 0.31  | 5.22  | 0.65 | 0.42 | 0.96 |

|           |                          |       |       |      |      |      |
|-----------|--------------------------|-------|-------|------|------|------|
| mir-3p    | hsa-let-7a-3p-L2         | 0.37  | 3.02  | 0.65 | 0.42 | 0.96 |
| mir-3p    | hsa-miR-3913-3p          | 0.49  | 1.59  | 0.65 | 0.42 | 0.96 |
| mir-5p3pr | hsa-miR-1468             | 0.52  | 2.31  | 0.65 | 0.42 | 0.96 |
| mir-5p3pr | hsa-miR-3672             | -0.52 | 1.53  | 0.65 | 0.42 | 0.96 |
| tRNA      | chr6.tRNA172-SerTGA      | 0.66  | 1.90  | 0.65 | 0.42 | 0.96 |
| snoRNA    | ACA9                     | -0.62 | 1.70  | 0.64 | 0.42 | 0.96 |
| tRNA      | chr6.tRNA77-GluCTC       | 0.31  | 4.25  | 0.64 | 0.42 | 0.96 |
| tRF5      | chr14.tRNA8-CysGCA-tRF5  | -0.54 | 2.18  | 0.64 | 0.42 | 0.96 |
| scRNA     | HY4-L36                  | 0.41  | 2.19  | 0.64 | 0.42 | 0.96 |
| snoRNA    | U55                      | -0.42 | 5.84  | 0.64 | 0.43 | 0.96 |
| mir-3p    | hsa-miR-501-3p           | 0.25  | 4.83  | 0.64 | 0.43 | 0.96 |
| snoRNA    | snR38C                   | -0.61 | 2.03  | 0.63 | 0.43 | 0.96 |
| scRNA     | HY4-L139                 | 0.18  | 10.83 | 0.63 | 0.43 | 0.96 |
| scRNA     | BC200-L95                | 0.40  | 3.20  | 0.63 | 0.43 | 0.96 |
| tRNA      | chr6.tRNA66-AlaTGC       | 0.46  | 1.95  | 0.63 | 0.43 | 0.96 |
| scRNA     | HY4-L93                  | 0.25  | 3.97  | 0.63 | 0.43 | 0.96 |
| scRNA     | BC200-L154               | 0.54  | 1.41  | 0.63 | 0.43 | 0.96 |
| scRNA     | HY1-L418                 | -0.40 | 1.64  | 0.63 | 0.43 | 0.96 |
| scRNA     | HY3-L279                 | 0.27  | 5.21  | 0.62 | 0.43 | 0.96 |
| scRNA     | BC200-L166               | 0.40  | 2.95  | 0.62 | 0.43 | 0.96 |
| snoRNA    | ACA16                    | -0.43 | 2.80  | 0.62 | 0.43 | 0.96 |
| mir-5p3pr | hsa-miR-4461             | -0.56 | 2.06  | 0.62 | 0.43 | 0.96 |
| mir-5p    | hsa-miR-99b-5p           | 0.24  | 6.89  | 0.62 | 0.43 | 0.96 |
| snoRNA    | HBII-336                 | -0.58 | 2.07  | 0.62 | 0.43 | 0.96 |
| tRF5      | chr16.tRNA23-LysTTT-tRF5 | 0.40  | 3.56  | 0.62 | 0.43 | 0.96 |
| mir-3p    | hsa-miR-4742-3p          | 0.69  | 1.43  | 0.62 | 0.43 | 0.96 |
| mir-5p3pr | hsa-miR-4447             | 0.51  | 1.30  | 0.62 | 0.43 | 0.96 |
| snoRNA    | ACA11                    | -0.48 | 2.12  | 0.61 | 0.43 | 0.96 |
| rRNA      | LSU-rRNA_Hsa-L384        | 0.18  | 14.09 | 0.61 | 0.43 | 0.96 |
| rRNA      | LSU-rRNA_Hsa-L308        | -0.49 | 1.76  | 0.61 | 0.44 | 0.96 |
| scRNA     | HY1-L3                   | 0.31  | 3.10  | 0.61 | 0.44 | 0.96 |
| mir-5p    | hsa-miR-338-5p           | 0.32  | 4.39  | 0.60 | 0.44 | 0.96 |
| scRNA     | BC200-L43                | -0.37 | 3.28  | 0.60 | 0.44 | 0.96 |
| mir-5p    | hsa-let-7f-5p-L2         | -0.20 | 6.10  | 0.60 | 0.44 | 0.96 |
| mir-3p    | hsa-miR-148a-3p          | -0.22 | 13.46 | 0.60 | 0.44 | 0.96 |
| snoRNA    | U47                      | -0.48 | 3.87  | 0.60 | 0.44 | 0.96 |
| mir-3p    | hsa-miR-423-3p           | 0.18  | 8.89  | 0.60 | 0.44 | 0.96 |
| mir-5p3pr | hsa-miR-3168             | 0.50  | 2.09  | 0.60 | 0.44 | 0.96 |
| rRNA      | LSU-rRNA_Hsa-L214        | -0.69 | 2.13  | 0.59 | 0.44 | 0.96 |
| mir-5p    | hsa-miR-199b-5p          | -0.39 | 2.97  | 0.59 | 0.44 | 0.96 |
| rRNA      | 5S-L990                  | 0.26  | 3.08  | 0.59 | 0.44 | 0.96 |
| scRNA     | HY4-L83                  | -0.27 | 4.19  | 0.59 | 0.44 | 0.96 |
| rRNA      | 5S-L935                  | 0.38  | 2.94  | 0.59 | 0.44 | 0.96 |



|           |                       |       |       |      |      |      |
|-----------|-----------------------|-------|-------|------|------|------|
| tRNA      | chr14.tRNA4-ThrTGT    | -0.49 | 1.44  | 0.59 | 0.44 | 0.96 |
| piRNA     | piR-33151-L8          | -0.25 | 4.43  | 0.58 | 0.44 | 0.96 |
| mir-5p3pr | hsa-miR-548j          | -0.46 | 1.80  | 0.58 | 0.45 | 0.96 |
| mir-5p    | hsa-miR-550a-3-5p     | 0.48  | 1.55  | 0.58 | 0.45 | 0.96 |
| snoRNA    | HBII-142              | -0.45 | 3.42  | 0.58 | 0.45 | 0.96 |
| mir-5p3pr | hsa-miR-3909          | 0.50  | 1.71  | 0.58 | 0.45 | 0.96 |
| mir-5p    | hsa-miR-382-5p        | -0.31 | 5.88  | 0.58 | 0.45 | 0.96 |
| scRNA     | HY1-L143              | 0.37  | 2.32  | 0.58 | 0.45 | 0.96 |
| scRNA     | HY1-L111              | 0.43  | 1.94  | 0.57 | 0.45 | 0.96 |
| mir-3p    | hsa-miR-323a-3p       | 0.42  | 3.26  | 0.57 | 0.45 | 0.96 |
| tRNA      | chr6.tRNA36-ArgACG    | 0.55  | 1.39  | 0.57 | 0.45 | 0.96 |
| mir-5p    | hsa-miR-199a-5p       | 0.24  | 6.35  | 0.57 | 0.45 | 0.96 |
| rRNA      | 5S-L255               | -0.28 | 2.65  | 0.57 | 0.45 | 0.96 |
| piRNA     | piR-36170             | -0.49 | 2.57  | 0.57 | 0.45 | 0.96 |
| mir-3p    | hsa-miR-539-3p        | 0.56  | 1.61  | 0.57 | 0.45 | 0.96 |
| snoRNA    | U63                   | -0.34 | 5.92  | 0.56 | 0.45 | 0.96 |
| mir-5p    | hsa-miR-642b-5p       | 0.52  | 1.56  | 0.55 | 0.46 | 0.96 |
| mir-5p    | hsa-miR-3158-5p-L2    | 0.60  | 1.49  | 0.55 | 0.46 | 0.96 |
| snoRNA    | U50B                  | -0.38 | 4.34  | 0.55 | 0.46 | 0.96 |
| scRNA     | HY1                   | 0.22  | 6.00  | 0.55 | 0.46 | 0.96 |
| rRNA      | LSU-rRNA_Hsa-L130     | -0.51 | 4.63  | 0.54 | 0.46 | 0.96 |
| snoRNA    | ACA18                 | -0.46 | 2.07  | 0.54 | 0.46 | 0.96 |
| scRNA     | BC200-L117            | 0.53  | 1.83  | 0.54 | 0.46 | 0.96 |
| tRNA      | chr3.tRNA10-PseudoCTC | 0.18  | 7.60  | 0.54 | 0.46 | 0.96 |
| mir-5p3pr | hsa-miR-320e          | -0.35 | 1.85  | 0.54 | 0.46 | 0.96 |
| scRNA     | HY4-L37               | 0.26  | 4.01  | 0.54 | 0.46 | 0.96 |
| mir-5p    | hsa-miR-532-5p        | -0.18 | 7.72  | 0.54 | 0.46 | 0.96 |
| scRNA     | HY4-L81               | 0.27  | 3.17  | 0.54 | 0.46 | 0.96 |
| tRNA      | chr1.tRNA79-GlyTCC    | -0.51 | 1.87  | 0.54 | 0.46 | 0.96 |
| snoRNA    | U105B                 | -0.44 | 4.75  | 0.54 | 0.46 | 0.96 |
| tRNA      | chr5.tRNA6-ValCAC     | -0.21 | 10.69 | 0.54 | 0.46 | 0.96 |
| rRNA      | SSU-rRNA_Hsa-L3       | 0.44  | 1.28  | 0.53 | 0.47 | 0.96 |
| scRNA     | HY5-L11               | -0.28 | 5.18  | 0.53 | 0.47 | 0.96 |
| rRNA      | LSU-rRNA_Hsa-L385     | 0.23  | 8.75  | 0.52 | 0.47 | 0.96 |
| mir-3p    | hsa-miR-4446-3p       | -0.29 | 3.56  | 0.52 | 0.47 | 0.96 |
| scRNA     | BC200-L18             | 0.35  | 3.08  | 0.52 | 0.47 | 0.96 |
| snoRNA    | mgU6-47               | 0.56  | 1.72  | 0.52 | 0.47 | 0.96 |
| piRNA     | piR-52416-L2          | -0.41 | 2.28  | 0.52 | 0.47 | 0.96 |
| rRNA      | LSU-rRNA_Hsa-L51      | -0.37 | 4.19  | 0.52 | 0.47 | 0.96 |
| snoRNA    | U42A                  | -0.45 | 4.44  | 0.52 | 0.47 | 0.96 |
| rRNA      | 5S-L363               | -0.42 | 1.50  | 0.52 | 0.47 | 0.96 |
| scRNA     | BC200-L16             | -0.66 | 1.59  | 0.52 | 0.47 | 0.96 |
| scRNA     | HY3-L196              | -0.34 | 1.85  | 0.51 | 0.47 | 0.96 |

|           |                            |       |       |      |      |      |
|-----------|----------------------------|-------|-------|------|------|------|
| tRF5      | chr17.tRNA31-AsnGTT-tRF5   | 0.40  | 2.92  | 0.51 | 0.47 | 0.96 |
| rRNA      | 5S-L397                    | -0.37 | 1.55  | 0.51 | 0.47 | 0.96 |
| snRNA     | U13_-L44                   | -0.52 | 1.56  | 0.51 | 0.48 | 0.96 |
| scRNA     | HY4-L92                    | 0.43  | 1.42  | 0.51 | 0.48 | 0.96 |
| mir-5p    | hsa-miR-24-2-5p            | -0.25 | 4.12  | 0.51 | 0.48 | 0.96 |
| piRNA     | piR-38502                  | -0.36 | 3.33  | 0.51 | 0.48 | 0.96 |
| rRNA      | 5S-L829                    | 0.37  | 2.65  | 0.51 | 0.48 | 0.96 |
| snoRNA    | U35A                       | -0.47 | 1.80  | 0.51 | 0.48 | 0.96 |
| mir-5p    | hsa-miR-339-5p             | 0.53  | 1.85  | 0.51 | 0.48 | 0.96 |
| tRF5      | chr18.tRNA3-PseudoTCC-tRF5 | -0.55 | 1.35  | 0.51 | 0.48 | 0.96 |
| snoRNA    | U49A                       | -0.30 | 7.52  | 0.50 | 0.48 | 0.96 |
| snoRNA    | HBII-55                    | -0.41 | 4.50  | 0.50 | 0.48 | 0.96 |
| scRNA     | HY1-L279                   | 0.23  | 4.02  | 0.50 | 0.48 | 0.96 |
| mir-3p    | hsa-miR-342-3p             | -0.30 | 3.63  | 0.49 | 0.48 | 0.96 |
| scRNA     | HY1-L280                   | 0.32  | 2.44  | 0.49 | 0.48 | 0.96 |
| mir-5p    | hsa-miR-2115-5p            | 0.44  | 1.27  | 0.49 | 0.48 | 0.96 |
| scRNA     | HY4-L112                   | 0.22  | 3.97  | 0.49 | 0.48 | 0.96 |
| tRF5      | chr4.tRNA3-CysGCA-tRF5     | -0.45 | 1.61  | 0.49 | 0.48 | 0.96 |
| mir-5p3pr | hsa-miR-370                | -0.37 | 4.87  | 0.49 | 0.48 | 0.96 |
| snoRNA    | U93                        | 0.64  | 1.72  | 0.49 | 0.48 | 0.96 |
| snRNA     | U6-L9                      | 0.30  | 4.67  | 0.49 | 0.49 | 0.96 |
| snoRNA    | U41                        | -0.46 | 2.48  | 0.49 | 0.49 | 0.96 |
| scRNA     | HY4-L114                   | -0.35 | 2.44  | 0.49 | 0.49 | 0.96 |
| rRNA      | LSU-rRNA_Hsa-L198          | 0.19  | 7.74  | 0.48 | 0.49 | 0.96 |
| mir-5p3pr | hsa-miR-375                | -0.27 | 6.00  | 0.48 | 0.49 | 0.96 |
| tRNA      | chr16.tRNA18-GlyGCC        | 0.39  | 1.78  | 0.48 | 0.49 | 0.96 |
| scRNA     | HY5-L21                    | -0.23 | 11.03 | 0.48 | 0.49 | 0.96 |
| scRNA     | BC200-L135                 | 0.40  | 2.24  | 0.47 | 0.49 | 0.96 |
| snoRNA    | U90                        | 0.49  | 2.75  | 0.47 | 0.49 | 0.96 |
| rRNA      | 5S-L602                    | 0.27  | 5.12  | 0.46 | 0.50 | 0.96 |
| mir-3p    | hsa-miR-191-3p             | -0.40 | 1.89  | 0.46 | 0.50 | 0.96 |
| tRNA      | chr5.tRNA15-ValAAC         | 0.24  | 4.70  | 0.46 | 0.50 | 0.96 |
| rRNA      | LSU-rRNA_Hsa-L345          | 0.39  | 2.84  | 0.46 | 0.50 | 0.96 |
| mir-5p    | hsa-miR-146a-5p            | -0.18 | 9.39  | 0.45 | 0.50 | 0.96 |
| mir-5p    | hsa-miR-92b-5p             | -0.30 | 2.28  | 0.45 | 0.50 | 0.96 |
| rRNA      | LSU-rRNA_Hsa-L34           | -0.41 | 1.35  | 0.45 | 0.50 | 0.96 |
| mir-5p3pr | hsa-miR-1287               | -0.46 | 1.87  | 0.45 | 0.50 | 0.96 |
| mir-3p    | hsa-miR-22-3p              | 0.16  | 10.18 | 0.45 | 0.50 | 0.96 |
| rRNA      | 5S-L1214                   | 0.42  | 1.33  | 0.45 | 0.50 | 0.96 |
| mir-5p    | hsa-miR-6723-5p            | -0.29 | 4.58  | 0.45 | 0.50 | 0.96 |
| mir-3p    | hsa-miR-652-3p             | -0.22 | 3.92  | 0.45 | 0.50 | 0.96 |
| piRNA     | piR-36743                  | 0.27  | 3.67  | 0.44 | 0.51 | 0.96 |
| rRNA      | SSU-rRNA_Hsa-L80           | 0.24  | 6.73  | 0.44 | 0.51 | 0.96 |

|          |                       |       |       |      |      |      |
|----------|-----------------------|-------|-------|------|------|------|
| snoRNA   | HBII-210              | -0.31 | 5.46  | 0.44 | 0.51 | 0.96 |
| scRNA    | HY1-L226              | 0.24  | 3.29  | 0.44 | 0.51 | 0.96 |
| snoRNA   | U38A                  | -0.39 | 4.22  | 0.44 | 0.51 | 0.96 |
| mir-3p   | hsa-miR-10a-3p        | 0.38  | 1.82  | 0.44 | 0.51 | 0.96 |
| tRNA     | chr17.tRNA15-CysGCA   | -0.19 | 6.11  | 0.44 | 0.51 | 0.96 |
| mir-5p   | hsa-miR-16-5p-L2      | -0.24 | 8.44  | 0.44 | 0.51 | 0.96 |
| rRNA     | 5S-L1068              | -0.25 | 2.39  | 0.44 | 0.51 | 0.96 |
| rRNA     | LSU-rRNA_Hsa-L159     | 0.25  | 2.57  | 0.44 | 0.51 | 0.96 |
| rRNA     | LSU-rRNA_Hsa-L132     | 0.18  | 10.51 | 0.44 | 0.51 | 0.96 |
| scRNA    | HY4-L38               | 0.23  | 4.19  | 0.44 | 0.51 | 0.96 |
| mir-3p   | hsa-miR-323b-3p       | 0.35  | 3.62  | 0.44 | 0.51 | 0.96 |
| rRNA     | LSU-rRNA_Hsa-L366     | -0.28 | 4.93  | 0.43 | 0.51 | 0.96 |
| tRNA     | chr6.tRNA98-LeuAAG    | 0.46  | 2.93  | 0.43 | 0.51 | 0.96 |
| mir-3p   | hsa-miR-335-3p        | 0.34  | 3.66  | 0.43 | 0.51 | 0.96 |
| snoRNA   | snR38B                | -0.41 | 3.26  | 0.43 | 0.51 | 0.96 |
| mir-5p3p | hsa-miR-421           | -0.26 | 2.77  | 0.43 | 0.51 | 0.96 |
| mir-3p   | hsa-miR-16-2-3p       | -0.20 | 7.97  | 0.43 | 0.51 | 0.96 |
| tRNA     | chr14.tRNA23-ProAGG   | -0.37 | 2.14  | 0.43 | 0.51 | 0.96 |
| snoRNA   | U21                   | -0.35 | 4.60  | 0.43 | 0.51 | 0.96 |
| snRNA    | U1-L29                | 0.37  | 2.03  | 0.43 | 0.51 | 0.96 |
| rRNA     | SSU-rRNA_Hsa-L26      | -0.29 | 3.24  | 0.42 | 0.51 | 0.96 |
| snoRNA   | E3                    | -0.28 | 2.66  | 0.42 | 0.52 | 0.96 |
| scRNA    | HY1-L183              | 0.25  | 2.44  | 0.42 | 0.52 | 0.96 |
| mir-3p   | hsa-miR-499b-3p       | -0.28 | 3.26  | 0.42 | 0.52 | 0.96 |
| mir-5p   | hsa-miR-10b-5p        | -0.20 | 10.26 | 0.42 | 0.52 | 0.96 |
| snoRNA   | ACA45                 | -0.15 | 6.69  | 0.42 | 0.52 | 0.96 |
| snoRNA   | U3-3                  | -0.52 | 2.21  | 0.42 | 0.52 | 0.96 |
| snoRNA   | U60                   | -0.34 | 4.21  | 0.42 | 0.52 | 0.96 |
| scRNA    | BC200-L27             | -0.35 | 2.97  | 0.41 | 0.52 | 0.96 |
| scRNA    | HY1-L397              | -0.23 | 3.27  | 0.41 | 0.52 | 0.96 |
| piRNA    | piR-33382-L2          | -0.51 | 2.24  | 0.41 | 0.52 | 0.96 |
| scRNA    | HY3-L190              | 0.29  | 2.20  | 0.41 | 0.52 | 0.96 |
| scRNA    | HY3-L518              | -0.15 | 8.30  | 0.41 | 0.52 | 0.96 |
| tRNA     | chr6.tRNA40-ValTAC    | -0.27 | 2.73  | 0.41 | 0.52 | 0.96 |
| snoRNA   | HBI-43                | 0.33  | 3.60  | 0.41 | 0.52 | 0.96 |
| snoRNA   | U62B                  | -0.34 | 3.72  | 0.41 | 0.52 | 0.96 |
| tRNA     | chr6.tRNA86-PseudoTAC | -0.41 | 2.07  | 0.41 | 0.52 | 0.96 |
| piRNA    | piR-41209             | 0.28  | 2.58  | 0.40 | 0.52 | 0.96 |
| rRNA     | 5S-L136               | -0.37 | 1.53  | 0.40 | 0.53 | 0.96 |
| mir-5p   | hsa-miR-505-5p        | 0.43  | 1.81  | 0.40 | 0.53 | 0.96 |
| rRNA     | LSU-rRNA_Hsa-L13      | 0.15  | 12.04 | 0.40 | 0.53 | 0.96 |
| scRNA    | HY1-L57               | 0.28  | 2.78  | 0.40 | 0.53 | 0.96 |
| snRNA    | U1-L38                | 0.44  | 1.64  | 0.40 | 0.53 | 0.96 |

|           |                        |       |       |      |      |      |
|-----------|------------------------|-------|-------|------|------|------|
| rRNA      | 5S-L558                | -0.18 | 7.28  | 0.40 | 0.53 | 0.96 |
| rRNA      | 5S-L526                | 0.47  | 1.32  | 0.40 | 0.53 | 0.96 |
| snoRNA    | U59A                   | -0.32 | 6.70  | 0.40 | 0.53 | 0.96 |
| scRNA     | HY1-L442               | -0.38 | 1.33  | 0.40 | 0.53 | 0.96 |
| scRNA     | HY1-L439               | -0.23 | 2.44  | 0.40 | 0.53 | 0.96 |
| mir-5p    | hsa-miR-330-5p         | 0.36  | 1.63  | 0.40 | 0.53 | 0.96 |
| scRNA     | BC200-L90              | 0.30  | 2.60  | 0.39 | 0.53 | 0.96 |
| rRNA      | LSU-rRNA_Hsa-L333      | 0.24  | 4.08  | 0.39 | 0.53 | 0.96 |
| scRNA     | HY4-L21                | -0.26 | 2.22  | 0.39 | 0.53 | 0.96 |
| scRNA     | HY4-L59                | 0.17  | 4.56  | 0.39 | 0.53 | 0.96 |
| mir-5p3pr | hsa-miR-548e           | 0.31  | 2.60  | 0.39 | 0.53 | 0.96 |
| mir-5p3pr | hsa-miR-1908           | 0.33  | 3.10  | 0.39 | 0.53 | 0.96 |
| scRNA     | HY1-L419               | 0.21  | 3.95  | 0.39 | 0.53 | 0.96 |
| tRNA      | chr17.tRNA17-SupTTA    | 0.35  | 2.90  | 0.39 | 0.53 | 0.96 |
| snoRNA    | U50                    | -0.27 | 5.82  | 0.38 | 0.54 | 0.96 |
| tRNA      | chr14.tRNA16-TyrGTA    | 0.35  | 3.58  | 0.38 | 0.54 | 0.96 |
| mir-3p    | hsa-miR-4433-3p        | 0.30  | 2.78  | 0.38 | 0.54 | 0.96 |
| tRNA      | chr1.tRNA58-LeuCAA     | -0.25 | 3.40  | 0.38 | 0.54 | 0.96 |
| rRNA      | 5S-L1129               | -0.31 | 1.90  | 0.38 | 0.54 | 0.96 |
| tRNA      | chr1.tRNA18-PseudoCCT  | 0.41  | 1.66  | 0.38 | 0.54 | 0.96 |
| scRNA     | HY4-L151               | -0.25 | 2.39  | 0.38 | 0.54 | 0.96 |
| mir-5p    | hsa-miR-1304-5p        | 0.39  | 1.47  | 0.38 | 0.54 | 0.96 |
| rRNA      | LSU-rRNA_Hsa-L208      | 0.15  | 7.16  | 0.38 | 0.54 | 0.96 |
| rRNA      | LSU-rRNA_Hsa-L139      | -0.15 | 14.15 | 0.37 | 0.54 | 0.96 |
| tRNA      | chr1.tRNA137-Pseudo??? | 0.28  | 6.02  | 0.37 | 0.54 | 0.96 |
| scRNA     | HY4-L39                | 0.20  | 3.89  | 0.37 | 0.54 | 0.96 |
| mir-5p    | hsa-miR-411-5p         | 0.36  | 2.70  | 0.37 | 0.54 | 0.96 |
| rRNA      | 5S-L254                | -0.26 | 2.29  | 0.37 | 0.54 | 0.96 |
| snRNA     | U5-L3                  | -0.33 | 2.02  | 0.37 | 0.54 | 0.96 |
| piRNA     | piR-34041              | -0.39 | 4.17  | 0.37 | 0.54 | 0.96 |
| scRNA     | BC200-L88              | 0.33  | 1.65  | 0.37 | 0.54 | 0.96 |
| mir-5p    | hsa-miR-769-5p         | -0.28 | 3.02  | 0.37 | 0.55 | 0.96 |
| scRNA     | HY1-L414               | 0.35  | 1.30  | 0.37 | 0.55 | 0.96 |
| tRF3      | chr3.tRNA2-ValAAC-tRF3 | 0.26  | 4.15  | 0.37 | 0.55 | 0.96 |
| snoRNA    | ACA36B                 | -0.20 | 3.83  | 0.36 | 0.55 | 0.96 |
| mir-3p    | hsa-miR-378a-3p        | -0.14 | 8.57  | 0.36 | 0.55 | 0.96 |
| snoRNA    | U31                    | -0.25 | 7.96  | 0.36 | 0.55 | 0.96 |
| snoRNA    | U52                    | -0.35 | 2.73  | 0.36 | 0.55 | 0.96 |
| tRNA      | chr1.tRNA81-AspGTC     | 0.27  | 4.35  | 0.36 | 0.55 | 0.96 |
| mir-3p    | hsa-miR-628-3p         | -0.24 | 3.76  | 0.35 | 0.55 | 0.96 |
| piRNA     | piR-32950              | 0.19  | 6.31  | 0.35 | 0.55 | 0.96 |
| tRNA      | chr1.tRNA102-PseudoTTC | -0.14 | 6.55  | 0.35 | 0.56 | 0.96 |
| mir-5p    | hsa-miR-1228-5p        | -0.36 | 2.00  | 0.35 | 0.56 | 0.96 |

|           |                            |       |       |      |      |      |
|-----------|----------------------------|-------|-------|------|------|------|
| mir-5p3pr | hsa-miR-941                | -0.16 | 6.39  | 0.35 | 0.56 | 0.96 |
| rRNA      | 5S-L194                    | 0.21  | 2.89  | 0.35 | 0.56 | 0.96 |
| tRNA      | chr6.tRNA78-LeuAAG         | 0.43  | 2.00  | 0.35 | 0.56 | 0.96 |
| tRNA      | chr11.tRNA11-LysTTT        | 0.26  | 7.37  | 0.35 | 0.56 | 0.96 |
| tRF3      | chr18.tRNA2-PseudoTCC-tRF3 | 0.31  | 3.09  | 0.34 | 0.56 | 0.96 |
| mir-5p    | hsa-miR-331-5p             | -0.40 | 1.28  | 0.34 | 0.56 | 0.96 |
| snRNA     | U5-L2                      | 0.17  | 6.33  | 0.34 | 0.56 | 0.96 |
| rRNA      | 5S-L790                    | 0.25  | 4.09  | 0.34 | 0.56 | 0.96 |
| mir-5p    | hsa-miR-130b-5p            | 0.28  | 4.40  | 0.34 | 0.56 | 0.96 |
| piRNA     | piR-36742                  | -0.19 | 5.16  | 0.34 | 0.56 | 0.96 |
| rRNA      | LSU-rRNA_Hsa-L388          | 0.13  | 10.79 | 0.33 | 0.56 | 0.96 |
| rRNA      | 5S-L676                    | 0.32  | 1.34  | 0.33 | 0.56 | 0.96 |
| snoRNA    | HBII-13                    | -0.46 | 3.91  | 0.33 | 0.56 | 0.96 |
| snoRNA    | ACA3-2                     | -0.34 | 2.59  | 0.33 | 0.56 | 0.96 |
| rRNA      | LSU-rRNA_Hsa-L323          | -0.24 | 8.20  | 0.33 | 0.57 | 0.96 |
| tRF3      | chr10.tRNA2-SerTGA-tRF3    | -0.34 | 2.00  | 0.33 | 0.57 | 0.96 |
| mir-5p    | hsa-miR-548ay-5p           | 0.35  | 2.18  | 0.33 | 0.57 | 0.96 |
| tRNA      | chr6.tRNA152-ValCAC        | -0.17 | 8.52  | 0.33 | 0.57 | 0.96 |
| piRNA     | piR-61648                  | 0.24  | 2.28  | 0.33 | 0.57 | 0.96 |
| piRNA     | piR-51810-L2               | -0.19 | 8.21  | 0.33 | 0.57 | 0.96 |
| tRNA      | chr2.tRNA27-GlyCCC         | -0.21 | 8.80  | 0.32 | 0.57 | 0.96 |
| snRNA     | U2-L161                    | 0.29  | 12.39 | 0.32 | 0.57 | 0.96 |
| tRNA      | chr1.tRNA16-HisGTG         | 0.15  | 11.64 | 0.32 | 0.57 | 0.96 |
| mir-3p    | hsa-miR-18a-3p             | 0.29  | 2.18  | 0.32 | 0.57 | 0.96 |
| mir-5p    | hsa-miR-550a-5p-L2         | 0.21  | 3.39  | 0.32 | 0.57 | 0.96 |
| piRNA     | piR-44984-L3               | -0.23 | 2.62  | 0.32 | 0.57 | 0.96 |
| mir-5p3pr | hsa-miR-889                | -0.34 | 2.82  | 0.32 | 0.57 | 0.96 |
| tRF5      | chr1.tRNA90-ValCAC-tRF5    | -0.35 | 2.14  | 0.32 | 0.57 | 0.96 |
| rRNA      | LSU-rRNA_Hsa-L29           | 0.22  | 2.54  | 0.32 | 0.57 | 0.96 |
| snoRNA    | HBII-202                   | -0.31 | 6.44  | 0.31 | 0.58 | 0.96 |
| scRNA     | HY3-L239                   | -0.33 | 1.81  | 0.31 | 0.58 | 0.96 |
| rRNA      | LSU-rRNA_Hsa-L221          | -0.26 | 2.74  | 0.31 | 0.58 | 0.96 |
| mir-3p    | hsa-miR-143-3p             | -0.17 | 9.70  | 0.31 | 0.58 | 0.96 |
| piRNA     | piR-34804                  | -0.21 | 4.98  | 0.31 | 0.58 | 0.97 |
| mir-3p    | hsa-miR-29c-3p             | 0.35  | 1.99  | 0.31 | 0.58 | 0.97 |
| rRNA      | 5S-L1262                   | -0.46 | 1.38  | 0.31 | 0.58 | 0.97 |
| snRNA     | U7-L52                     | 0.25  | 6.85  | 0.31 | 0.58 | 0.97 |
| tRNA      | chr2.tRNA6-GluTTC          | -0.17 | 4.09  | 0.30 | 0.58 | 0.97 |
| mir-5p    | hsa-miR-485-5p             | -0.26 | 4.20  | 0.30 | 0.58 | 0.97 |
| scRNA     | HY4-L12                    | -0.14 | 5.27  | 0.30 | 0.58 | 0.97 |
| rRNA      | LSU-rRNA_Hsa-L346          | 0.27  | 1.67  | 0.30 | 0.59 | 0.97 |
| tRNA      | chr14.tRNA19-TyrGTA        | 0.30  | 2.52  | 0.30 | 0.59 | 0.97 |
| rRNA      | LSU-rRNA_Hsa-L15           | -0.15 | 6.48  | 0.29 | 0.59 | 0.97 |

|          |                         |       |       |      |      |      |
|----------|-------------------------|-------|-------|------|------|------|
| scRNA    | HY4-L52                 | 0.19  | 2.37  | 0.29 | 0.59 | 0.97 |
| snRNA    | U1-L39                  | -0.37 | 1.74  | 0.29 | 0.59 | 0.97 |
| mir-5p   | hsa-miR-4665-5p         | -0.40 | 1.60  | 0.29 | 0.59 | 0.97 |
| mir-5p   | hsa-miR-223-5p          | -0.17 | 8.71  | 0.29 | 0.59 | 0.97 |
| mir-3p   | hsa-miR-654-3p          | -0.30 | 3.75  | 0.29 | 0.59 | 0.97 |
| scRNA    | HY1-L247                | 0.34  | 1.49  | 0.29 | 0.59 | 0.97 |
| rRNA     | 5S-L97                  | -0.15 | 10.24 | 0.29 | 0.59 | 0.97 |
| scRNA    | HY4-L41                 | 0.23  | 1.86  | 0.29 | 0.59 | 0.97 |
| rRNA     | LSU-rRNA_Hsa-L360       | -0.24 | 1.84  | 0.29 | 0.59 | 0.97 |
| rRNA     | SSU-rRNA_Hsa-L30        | 0.12  | 11.12 | 0.28 | 0.59 | 0.97 |
| rRNA     | 5S-L357                 | 0.28  | 2.11  | 0.28 | 0.59 | 0.97 |
| mir-3p   | hsa-miR-126-3p          | 0.13  | 11.12 | 0.28 | 0.60 | 0.97 |
| mir-3p   | hsa-miR-23b-3p          | -0.22 | 3.55  | 0.28 | 0.60 | 0.97 |
| tRF5     | chr19.tRNA5-LysCTT-tRF5 | -0.27 | 4.33  | 0.28 | 0.60 | 0.97 |
| tRNA     | chr17.tRNA3-GlnCTG      | 0.15  | 6.70  | 0.28 | 0.60 | 0.97 |
| tRNA     | chr16.tRNA7-LysCTT      | 0.32  | 2.24  | 0.28 | 0.60 | 0.97 |
| mir-3p   | hsa-miR-542-3p          | 0.26  | 3.59  | 0.28 | 0.60 | 0.97 |
| scRNA    | HY1-L103                | 0.26  | 2.46  | 0.28 | 0.60 | 0.97 |
| mir-5p   | hsa-miR-409-5p          | 0.48  | 1.55  | 0.28 | 0.60 | 0.97 |
| rRNA     | SSU-rRNA_Hsa-L33        | 0.14  | 12.79 | 0.28 | 0.60 | 0.97 |
| snoRNA   | U101                    | 0.27  | 5.22  | 0.28 | 0.60 | 0.97 |
| mir-3p   | hsa-miR-582-3p          | -0.24 | 4.81  | 0.28 | 0.60 | 0.97 |
| mir-5p   | hsa-miR-3614-5p         | 0.33  | 1.91  | 0.27 | 0.60 | 0.97 |
| mir-5p   | hsa-miR-345-5p          | 0.26  | 2.70  | 0.27 | 0.60 | 0.97 |
| rRNA     | 5S-L101                 | 0.15  | 9.06  | 0.27 | 0.60 | 0.97 |
| mir-5p   | hsa-miR-660-5p          | -0.20 | 3.50  | 0.27 | 0.60 | 0.97 |
| rRNA     | 5S-L367                 | -0.23 | 1.91  | 0.27 | 0.60 | 0.97 |
| scRNA    | BC200-L139              | 0.20  | 3.27  | 0.27 | 0.60 | 0.97 |
| snRNA    | U5-L108                 | 0.37  | 2.23  | 0.27 | 0.60 | 0.97 |
| scRNA    | BC200-L29               | -0.28 | 2.92  | 0.27 | 0.60 | 0.97 |
| scRNA    | BC200-L101              | 0.41  | 1.85  | 0.27 | 0.61 | 0.97 |
| snoRNA   | U85                     | -0.25 | 3.06  | 0.26 | 0.61 | 0.97 |
| snoRNA   | U29                     | 0.28  | 5.29  | 0.26 | 0.61 | 0.97 |
| piRNA    | piR-59299               | -0.31 | 1.72  | 0.26 | 0.61 | 0.97 |
| tRF5     | chr6.tRNA78-LeuAAG-tRF5 | -0.48 | 1.31  | 0.26 | 0.61 | 0.97 |
| tRF5     | chr1.tRNA98-ValCAC-tRF5 | -0.28 | 2.65  | 0.26 | 0.61 | 0.98 |
| scRNA    | BC200-L114              | 0.23  | 2.21  | 0.25 | 0.61 | 0.98 |
| mir-3p   | hsa-miR-127-3p          | -0.24 | 5.07  | 0.25 | 0.61 | 0.98 |
| mir-5p   | hsa-miR-25-5p           | -0.33 | 2.07  | 0.25 | 0.62 | 0.98 |
| mir-5p3p | hsa-miR-1278            | -0.42 | 1.56  | 0.25 | 0.62 | 0.98 |
| rRNA     | LSU-rRNA_Hsa-L252       | -0.18 | 2.99  | 0.25 | 0.62 | 0.98 |
| tRF5     | chr14.tRNA4-ThrTGT-tRF5 | 0.24  | 2.23  | 0.25 | 0.62 | 0.98 |
| snoRNA   | HBII-276                | -0.30 | 3.49  | 0.25 | 0.62 | 0.98 |

|          |                        |       |       |      |      |      |
|----------|------------------------|-------|-------|------|------|------|
| mir-5p3p | hsa-miR-103b           | 0.14  | 8.26  | 0.24 | 0.62 | 0.98 |
| rRNA     | 5S-L95                 | 0.25  | 1.71  | 0.24 | 0.62 | 0.98 |
| scRNA    | HY4-L57                | 0.19  | 2.80  | 0.24 | 0.62 | 0.98 |
| scRNA    | HY4-L47                | -0.22 | 2.67  | 0.24 | 0.62 | 0.98 |
| snRNA    | U5-L76                 | 0.30  | 2.56  | 0.24 | 0.62 | 0.98 |
| piRNA    | piR-32678-L3           | 0.14  | 10.98 | 0.24 | 0.62 | 0.98 |
| scRNA    | HY1-L263               | 0.21  | 2.72  | 0.24 | 0.62 | 0.98 |
| tRF3     | chr3.tRNA6-CysGCA-tRF3 | 0.33  | 2.19  | 0.24 | 0.63 | 0.98 |
| snoRNA   | U45B                   | -0.31 | 2.57  | 0.24 | 0.63 | 0.98 |
| tRNA     | chr7.tRNA8-CysGCA      | 0.33  | 1.87  | 0.24 | 0.63 | 0.98 |
| scRNA    | HY3-L524               | 0.35  | 1.56  | 0.23 | 0.63 | 0.98 |
| rRNA     | LSU-rRNA_Hsa-L212      | 0.17  | 3.25  | 0.23 | 0.63 | 0.98 |
| rRNA     | SSU-rRNA_Hsa-L65       | 0.17  | 4.28  | 0.23 | 0.63 | 0.98 |
| rRNA     | 5S-L109                | -0.13 | 9.56  | 0.23 | 0.63 | 0.98 |
| tRNA     | chr16.tRNA32-LysCTT    | 0.27  | 2.11  | 0.23 | 0.63 | 0.98 |
| scRNA    | BC200-L76              | -0.28 | 2.55  | 0.22 | 0.64 | 0.98 |
| tRNA     | chr14.tRNA7-ArgACG     | 0.27  | 1.75  | 0.22 | 0.64 | 0.98 |
| rRNA     | 5S-L106                | 0.15  | 12.29 | 0.22 | 0.64 | 0.98 |
| rRNA     | SSU-rRNA_Hsa-L16       | -0.18 | 6.78  | 0.22 | 0.64 | 0.98 |
| rRNA     | LSU-rRNA_Hsa-L380      | 0.12  | 13.98 | 0.22 | 0.64 | 0.98 |
| rRNA     | LSU-rRNA_Hsa-L166      | 0.46  | 5.43  | 0.22 | 0.64 | 0.98 |
| rRNA     | 5S-L1152               | -0.22 | 1.59  | 0.22 | 0.64 | 0.98 |
| rRNA     | 5S-L627                | -0.32 | 1.59  | 0.22 | 0.64 | 0.98 |
| tRNA     | chr6.tRNA133-ValCAC    | -0.19 | 2.93  | 0.22 | 0.64 | 0.98 |
| scRNA    | HY4-L71                | 0.13  | 5.97  | 0.22 | 0.64 | 0.98 |
| snoRNA   | U48                    | -0.21 | 5.72  | 0.22 | 0.64 | 0.98 |
| scRNA    | HY1-L273               | 0.20  | 1.90  | 0.22 | 0.64 | 0.98 |
| mir-5p   | hsa-let-7b-5p          | -0.09 | 12.45 | 0.22 | 0.64 | 0.98 |
| tRNA     | chr16.tRNA31-PseudoTGG | 0.33  | 3.01  | 0.22 | 0.64 | 0.98 |
| mir-3p   | hsa-miR-3184-3p        | 0.11  | 11.60 | 0.22 | 0.64 | 0.98 |
| tRNA     | chr16.tRNA13-PseudoCTT | 0.21  | 4.70  | 0.21 | 0.65 | 0.99 |
| scRNA    | BC200-L24              | -0.24 | 2.86  | 0.21 | 0.65 | 0.99 |
| scRNA    | BC200-L69              | 0.31  | 1.43  | 0.21 | 0.65 | 0.99 |
| piRNA    | piR-61647-L4           | 0.17  | 3.62  | 0.21 | 0.65 | 0.99 |
| rRNA     | 5S-L957                | -0.30 | 1.43  | 0.21 | 0.65 | 0.99 |
| mir-5p   | hsa-miR-27a-5p         | -0.16 | 4.98  | 0.21 | 0.65 | 0.99 |
| scRNA    | HY3-L282               | 0.18  | 3.75  | 0.21 | 0.65 | 0.99 |
| piRNA    | piR-33151-L9           | -0.17 | 3.44  | 0.21 | 0.65 | 0.99 |
| scRNA    | HY3-L142               | -0.34 | 1.70  | 0.20 | 0.65 | 0.99 |
| scRNA    | BC200-L147             | 0.27  | 2.25  | 0.20 | 0.65 | 0.99 |
| scRNA    | HY3-L478               | 0.13  | 8.12  | 0.20 | 0.65 | 0.99 |
| mir-5p   | hsa-miR-99a-5p         | -0.17 | 7.41  | 0.20 | 0.65 | 0.99 |
| piRNA    | piR-49144              | -0.11 | 7.05  | 0.20 | 0.66 | 0.99 |

|           |                        |       |       |      |      |      |
|-----------|------------------------|-------|-------|------|------|------|
| scRNA     | HY1-L13                | 0.19  | 2.51  | 0.20 | 0.66 | 0.99 |
| mir-3p    | hsa-miR-185-3p         | 0.20  | 2.98  | 0.20 | 0.66 | 0.99 |
| scRNA     | HY4-L42                | 0.27  | 1.44  | 0.19 | 0.66 | 0.99 |
| rRNA      | LSU-rRNA_Hsa-L251      | 0.13  | 7.46  | 0.19 | 0.66 | 0.99 |
| scRNA     | HY4-L154               | -0.26 | 1.53  | 0.19 | 0.66 | 0.99 |
| tRNA      | chr16.tRNA27-LeuTAG    | -0.26 | 2.11  | 0.19 | 0.66 | 0.99 |
| rRNA      | LSU-rRNA_Hsa-L162      | -0.20 | 2.42  | 0.19 | 0.66 | 0.99 |
| tRNA      | chr14.tRNA12-PseudoTTT | 0.32  | 1.55  | 0.19 | 0.66 | 0.99 |
| rRNA      | LSU-rRNA_Hsa-L73       | -0.22 | 2.19  | 0.19 | 0.67 | 0.99 |
| snRNA     | U7-L207                | 0.43  | 2.19  | 0.19 | 0.67 | 0.99 |
| rRNA      | 5S-L98                 | -0.11 | 9.83  | 0.18 | 0.67 | 0.99 |
| scRNA     | HY4-L70                | -0.10 | 9.07  | 0.18 | 0.67 | 0.99 |
| rRNA      | SSU-rRNA_Hsa-L24       | 0.12  | 9.30  | 0.18 | 0.67 | 0.99 |
| rRNA      | LSU-rRNA_Hsa-L202      | -0.17 | 3.79  | 0.18 | 0.67 | 0.99 |
| snRNA     | U7-L159                | -0.36 | 1.62  | 0.18 | 0.67 | 0.99 |
| mir-5p3pr | hsa-miR-760            | -0.18 | 2.38  | 0.18 | 0.67 | 0.99 |
| rRNA      | LSU-rRNA_Hsa-L348      | -0.25 | 1.92  | 0.18 | 0.67 | 0.99 |
| scRNA     | BC200-L7               | -0.24 | 2.61  | 0.18 | 0.67 | 0.99 |
| rRNA      | LSU-rRNA_Hsa-L331      | -0.27 | 1.53  | 0.18 | 0.67 | 0.99 |
| scRNA     | HY4-L122               | -0.10 | 7.82  | 0.18 | 0.67 | 0.99 |
| rRNA      | LSU-rRNA_Hsa-L278      | 0.16  | 2.72  | 0.18 | 0.68 | 0.99 |
| mir-3p    | hsa-let-7b-3p          | 0.11  | 3.86  | 0.17 | 0.68 | 0.99 |
| mir-5p    | hsa-miR-146b-5p        | -0.11 | 7.71  | 0.17 | 0.68 | 0.99 |
| mir-3p    | hsa-miR-363-3p         | -0.12 | 7.85  | 0.17 | 0.68 | 0.99 |
| snoRNA    | U18A                   | -0.23 | 6.81  | 0.17 | 0.68 | 0.99 |
| rRNA      | LSU-rRNA_Hsa-L58       | -0.13 | 7.02  | 0.17 | 0.68 | 0.99 |
| mir-5p    | hsa-miR-30a-5p         | -0.11 | 7.14  | 0.17 | 0.68 | 0.99 |
| mir-5p3pr | hsa-miR-2110           | -0.11 | 5.17  | 0.17 | 0.68 | 0.99 |
| mir-3p    | hsa-miR-181a-2-3p      | 0.14  | 4.18  | 0.17 | 0.68 | 0.99 |
| mir-5p    | hsa-miR-7-5p-L3        | -0.25 | 1.44  | 0.17 | 0.68 | 0.99 |
| piRNA     | piR-36716              | 0.24  | 2.87  | 0.17 | 0.68 | 0.99 |
| mir-5p3pr | hsa-miR-320b           | 0.12  | 4.99  | 0.17 | 0.68 | 0.99 |
| scRNA     | BC200-L72              | 0.31  | 1.58  | 0.17 | 0.68 | 0.99 |
| snRNA     | U4-L40                 | 0.21  | 2.99  | 0.17 | 0.68 | 0.99 |
| mir-5p    | hsa-miR-335-5p         | 0.13  | 3.57  | 0.17 | 0.68 | 0.99 |
| scRNA     | BC200-L4               | 0.18  | 3.40  | 0.17 | 0.68 | 0.99 |
| mir-5p    | hsa-miR-589-5p         | 0.14  | 4.55  | 0.16 | 0.69 | 0.99 |
| mir-5p    | hsa-miR-450a-5p        | 0.20  | 3.31  | 0.16 | 0.69 | 0.99 |
| mir-5p3pr | hsa-miR-543            | -0.17 | 5.86  | 0.16 | 0.69 | 0.99 |
| tRNA      | chr6.tRNA143-LysTTT    | 0.17  | 5.55  | 0.16 | 0.69 | 0.99 |
| piRNA     | piR-49143              | -0.09 | 11.96 | 0.16 | 0.69 | 0.99 |
| tRNA      | chr6.tRNA128-GlyGCC    | 0.12  | 4.35  | 0.16 | 0.69 | 0.99 |
| piRNA     | piR-33468-L4           | 0.14  | 2.34  | 0.16 | 0.69 | 0.99 |



|           |                          |       |       |      |      |      |
|-----------|--------------------------|-------|-------|------|------|------|
| rRNA      | 5S-L1075                 | -0.16 | 3.11  | 0.16 | 0.69 | 0.99 |
| rRNA      | 5S-L102                  | -0.11 | 7.36  | 0.15 | 0.69 | 0.99 |
| rRNA      | SSU-rRNA_Hsa-L25         | -0.14 | 4.08  | 0.15 | 0.69 | 0.99 |
| mir-5p    | hsa-miR-30d-5p           | -0.09 | 10.84 | 0.15 | 0.70 | 0.99 |
| scRNA     | HY3-L105                 | -0.17 | 3.97  | 0.15 | 0.70 | 0.99 |
| scRNA     | HY1-L261                 | 0.25  | 1.76  | 0.15 | 0.70 | 0.99 |
| piRNA     | piR-43325-L2             | 0.19  | 2.34  | 0.15 | 0.70 | 0.99 |
| scRNA     | HY4-L100                 | 0.16  | 3.24  | 0.15 | 0.70 | 0.99 |
| mir-5p    | hsa-miR-766-5p           | -0.22 | 1.81  | 0.15 | 0.70 | 0.99 |
| mir-5p    | hsa-miR-584-5p           | 0.12  | 7.31  | 0.15 | 0.70 | 0.99 |
| rRNA      | SSU-rRNA_Hsa-L50         | -0.17 | 4.47  | 0.15 | 0.70 | 0.99 |
| rRNA      | 5S-L500                  | 0.23  | 1.78  | 0.15 | 0.70 | 0.99 |
| mir-5p3pr | hsa-miR-511-L2           | -0.20 | 3.90  | 0.15 | 0.70 | 0.99 |
| mir-5p3pr | hsa-miR-215              | 0.17  | 3.83  | 0.14 | 0.70 | 0.99 |
| mir-5p3pr | hsa-miR-433              | 0.19  | 3.46  | 0.14 | 0.70 | 0.99 |
| snoRNA    | U27                      | -0.21 | 4.90  | 0.14 | 0.70 | 0.99 |
| scRNA     | HY4-L69                  | 0.09  | 9.89  | 0.14 | 0.70 | 0.99 |
| tRNA      | chr12.tRNA11-PheGAA      | 0.30  | 1.77  | 0.14 | 0.71 | 0.99 |
| scRNA     | HY3-L45                  | 0.17  | 3.48  | 0.14 | 0.71 | 0.99 |
| rRNA      | 5S-L550                  | -0.16 | 2.32  | 0.14 | 0.71 | 0.99 |
| tRF5      | chr17.tRNA25-SeCTCA-tRF5 | -0.19 | 2.25  | 0.14 | 0.71 | 0.99 |
| rRNA      | SSU-rRNA_Hsa-L34         | 0.12  | 5.52  | 0.14 | 0.71 | 0.99 |
| rRNA      | 5S-L126                  | 0.16  | 2.55  | 0.14 | 0.71 | 0.99 |
| snRNA     | U5-L66                   | 0.13  | 6.99  | 0.14 | 0.71 | 0.99 |
| rRNA      | LSU-rRNA_Hsa-L53         | 0.17  | 2.22  | 0.14 | 0.71 | 0.99 |
| tRNA      | chr15.tRNA2-LysCTT       | 0.10  | 6.59  | 0.14 | 0.71 | 0.99 |
| snoRNA    | E2                       | 0.25  | 2.14  | 0.14 | 0.71 | 0.99 |
| scRNA     | HY3-L287                 | -0.18 | 1.40  | 0.14 | 0.71 | 0.99 |
| mir-3p    | hsa-miR-548o-3p-L2       | -0.16 | 3.14  | 0.14 | 0.71 | 0.99 |
| scRNA     | HY4-L30                  | 0.11  | 3.53  | 0.13 | 0.71 | 0.99 |
| scRNA     | HY1-L28                  | 0.22  | 1.58  | 0.13 | 0.71 | 0.99 |
| mir-3p    | hsa-miR-339-3p           | 0.14  | 2.88  | 0.13 | 0.72 | 0.99 |
| tRNA      | chr7.tRNA21-CysGCA       | 0.23  | 1.68  | 0.13 | 0.72 | 0.99 |
| mir-5p    | hsa-miR-629-5p           | -0.09 | 7.76  | 0.13 | 0.72 | 0.99 |
| mir-5p3pr | hsa-miR-206              | -0.30 | 2.36  | 0.13 | 0.72 | 0.99 |
| scRNA     | HY1-L227                 | -0.21 | 1.30  | 0.13 | 0.72 | 0.99 |
| scRNA     | HY1-L326                 | -0.25 | 1.43  | 0.13 | 0.72 | 0.99 |
| tRNA      | chr12.tRNA4-AspGTC       | -0.17 | 4.64  | 0.13 | 0.72 | 0.99 |
| snoRNA    | U73a                     | -0.30 | 1.79  | 0.13 | 0.72 | 0.99 |
| mir-3p    | hsa-miR-574-3p           | 0.22  | 1.66  | 0.13 | 0.72 | 0.99 |
| rRNA      | 5S-L688                  | 0.15  | 4.43  | 0.13 | 0.72 | 0.99 |
| mir-3p    | hsa-miR-409-3p           | 0.16  | 5.71  | 0.12 | 0.72 | 0.99 |
| scRNA     | HY1-L389                 | 0.15  | 2.66  | 0.12 | 0.72 | 0.99 |

|        |                            |       |       |      |      |      |
|--------|----------------------------|-------|-------|------|------|------|
| rRNA   | 5S-L782                    | 0.12  | 3.63  | 0.12 | 0.72 | 0.99 |
| rRNA   | LSU-rRNA_Hsa-L42           | 0.22  | 1.88  | 0.12 | 0.72 | 0.99 |
| scRNA  | BC200-L122                 | -0.15 | 3.31  | 0.12 | 0.73 | 0.99 |
| scRNA  | BC200-L167                 | -0.20 | 1.58  | 0.12 | 0.73 | 0.99 |
| scRNA  | HY5-L7                     | 0.20  | 2.29  | 0.12 | 0.73 | 0.99 |
| tRF3   | chr15.tRNA6-PseudoCTT-tRF3 | 0.21  | 2.01  | 0.12 | 0.73 | 0.99 |
| snRNA  | U2-L1001                   | 0.18  | 2.25  | 0.12 | 0.73 | 0.99 |
| snRNA  | U1-L33                     | -0.17 | 2.56  | 0.12 | 0.73 | 0.99 |
| rRNA   | 5S-L471                    | 0.18  | 2.19  | 0.12 | 0.73 | 0.99 |
| mir-5p | hsa-miR-17-5p              | -0.12 | 5.08  | 0.12 | 0.73 | 0.99 |
| rRNA   | 5S-L573                    | 0.15  | 3.03  | 0.12 | 0.73 | 0.99 |
| rRNA   | 5S-L297                    | -0.20 | 1.59  | 0.12 | 0.73 | 0.99 |
| mir-5p | hsa-miR-96-5p              | -0.21 | 2.19  | 0.12 | 0.73 | 0.99 |
| scRNA  | HY1-L124                   | 0.16  | 1.84  | 0.12 | 0.73 | 0.99 |
| rRNA   | 5S-L1143                   | 0.19  | 1.64  | 0.11 | 0.74 | 0.99 |
| mir-5p | hsa-miR-23a-5p             | -0.17 | 1.78  | 0.11 | 0.74 | 0.99 |
| mir-5p | hsa-miR-3184-5p            | 0.08  | 7.99  | 0.11 | 0.74 | 0.99 |
| scRNA  | HY4-L72                    | 0.08  | 7.28  | 0.11 | 0.74 | 0.99 |
| mir-3p | hsa-miR-3591-3p            | -0.18 | 12.23 | 0.11 | 0.74 | 0.99 |
| mir-3p | hsa-miR-29b-3p             | -0.16 | 2.25  | 0.11 | 0.74 | 0.99 |
| scRNA  | HY5-L19                    | -0.18 | 2.11  | 0.11 | 0.74 | 0.99 |
| tRF5   | chr3.tRNA5-LeuAAG-tRF5     | 0.11  | 3.59  | 0.11 | 0.74 | 0.99 |
| scRNA  | BC200-L46                  | 0.25  | 1.64  | 0.11 | 0.74 | 0.99 |
| piRNA  | piR-61465                  | -0.16 | 3.75  | 0.11 | 0.74 | 0.99 |
| scRNA  | HY4-L150                   | 0.14  | 3.26  | 0.11 | 0.74 | 0.99 |
| rRNA   | LSU-rRNA_Hsa-L403          | 0.08  | 9.95  | 0.11 | 0.74 | 0.99 |
| scRNA  | HY4-L20                    | 0.10  | 3.35  | 0.11 | 0.74 | 0.99 |
| mir-3p | hsa-miR-3613-3p            | 0.22  | 1.73  | 0.11 | 0.74 | 0.99 |
| rRNA   | LSU-rRNA_Hsa-L309          | -0.11 | 8.19  | 0.11 | 0.74 | 0.99 |
| snoRNA | HBII-85-8                  | 0.26  | 2.21  | 0.11 | 0.74 | 0.99 |
| tRNA   | chr1.tRNA117-GlyTCC        | 0.12  | 2.71  | 0.11 | 0.74 | 0.99 |
| mir-5p | hsa-let-7d-5p              | 0.09  | 8.11  | 0.11 | 0.74 | 0.99 |
| mir-5p | hsa-miR-493-5p             | -0.16 | 4.61  | 0.11 | 0.74 | 0.99 |
| mir-3p | hsa-miR-382-3p             | -0.23 | 2.29  | 0.11 | 0.74 | 0.99 |
| snRNA  | U1-L174                    | -0.19 | 1.76  | 0.11 | 0.74 | 0.99 |
| rRNA   | 5S-L1144                   | 0.16  | 1.38  | 0.11 | 0.74 | 0.99 |
| rRNA   | 5S-L1070                   | 0.21  | 1.47  | 0.11 | 0.75 | 0.99 |
| scRNA  | HY4-L56                    | -0.15 | 1.82  | 0.10 | 0.75 | 0.99 |
| mir-5p | hsa-miR-129-5p-L2          | 0.17  | 1.82  | 0.10 | 0.75 | 0.99 |
| tRNA   | chr16.tRNA10-LysCTT        | 0.10  | 4.96  | 0.10 | 0.75 | 0.99 |
| tRNA   | chr6.tRNA138-ArgACG        | 0.22  | 1.66  | 0.10 | 0.75 | 0.99 |
| scRNA  | BC200-L36                  | -0.20 | 2.68  | 0.10 | 0.75 | 0.99 |
| scRNA  | HY4-L126                   | 0.11  | 3.61  | 0.10 | 0.75 | 0.99 |

|           |                             |       |       |      |      |      |
|-----------|-----------------------------|-------|-------|------|------|------|
| rRNA      | 5S-L758                     | 0.15  | 2.59  | 0.10 | 0.75 | 0.99 |
| mir-5p3pr | hsa-miR-1284                | 0.18  | 1.70  | 0.10 | 0.75 | 0.99 |
| mir-5p    | hsa-miR-23b-5p              | -0.22 | 1.51  | 0.10 | 0.75 | 0.99 |
| scRNA     | HY1-L324                    | 0.19  | 1.92  | 0.10 | 0.75 | 0.99 |
| scRNA     | HY4-L142                    | -0.11 | 3.10  | 0.10 | 0.75 | 0.99 |
| snRNA     | U1-L7                       | -0.09 | 6.15  | 0.10 | 0.76 | 0.99 |
| scRNA     | HY4-L58                     | 0.09  | 3.81  | 0.10 | 0.76 | 0.99 |
| scRNA     | HY4-L49                     | 0.15  | 1.27  | 0.10 | 0.76 | 0.99 |
| mir-3p    | hsa-miR-3187-3p             | 0.22  | 1.63  | 0.10 | 0.76 | 0.99 |
| scRNA     | BC200-L110                  | 0.17  | 1.47  | 0.10 | 0.76 | 0.99 |
| scRNA     | BC200-L138                  | -0.12 | 4.89  | 0.10 | 0.76 | 0.99 |
| tRNA      | chr1.tRNA52-ProCGG          | 0.17  | 2.13  | 0.10 | 0.76 | 0.99 |
| tRNA      | chr17.tRNA2-LysTTT          | 0.16  | 3.04  | 0.09 | 0.76 | 0.99 |
| rRNA      | 5S-L108                     | 0.07  | 11.53 | 0.09 | 0.76 | 0.99 |
| mir-5p    | hsa-miR-140-5p              | 0.12  | 4.20  | 0.09 | 0.76 | 0.99 |
| tRNA      | chr3.tRNA7-CysGCA           | 0.17  | 1.80  | 0.09 | 0.76 | 0.99 |
| tRNA      | chr17.tRNA41-SerCGA         | -0.28 | 2.38  | 0.09 | 0.76 | 0.99 |
| piRNA     | piR-57824                   | 0.19  | 1.45  | 0.09 | 0.76 | 0.99 |
| scRNA     | HY3-L35                     | -0.21 | 2.20  | 0.09 | 0.76 | 0.99 |
| snoRNA    | ACA51                       | 0.16  | 2.14  | 0.09 | 0.76 | 0.99 |
| snoRNA    | U22                         | -0.19 | 3.81  | 0.09 | 0.76 | 0.99 |
| rRNA      | LSU-rRNA_Hsa-L66            | -0.17 | 1.86  | 0.09 | 0.76 | 0.99 |
| scRNA     | HY1-L106                    | 0.23  | 1.92  | 0.09 | 0.76 | 0.99 |
| scRNA     | HY3-L372                    | -0.17 | 2.47  | 0.09 | 0.77 | 0.99 |
| mir-5p    | hsa-miR-191-5p              | 0.07  | 8.87  | 0.09 | 0.77 | 0.99 |
| mir-5p3pr | hsa-miR-378g                | -0.14 | 2.04  | 0.09 | 0.77 | 0.99 |
| snRNA     | U1-L43                      | 0.15  | 1.93  | 0.09 | 0.77 | 0.99 |
| mir-3p    | hsa-miR-145-3p              | 0.09  | 4.84  | 0.09 | 0.77 | 0.99 |
| snoRNA    | U18B                        | -0.18 | 2.75  | 0.09 | 0.77 | 0.99 |
| snoRNA    | HBII-234                    | -0.22 | 2.39  | 0.09 | 0.77 | 0.99 |
| snoRNA    | U30                         | 0.17  | 6.13  | 0.09 | 0.77 | 0.99 |
| mir-5p    | hsa-miR-26a-5p-L2           | 0.07  | 10.75 | 0.08 | 0.77 | 0.99 |
| piRNA     | piR-35952-L4                | -0.17 | 3.22  | 0.08 | 0.77 | 0.99 |
| snoRNA    | ACA61                       | -0.22 | 2.02  | 0.08 | 0.77 | 0.99 |
| rRNA      | 5S-L247                     | 0.15  | 1.54  | 0.08 | 0.77 | 0.99 |
| tRNA      | chr6.tRNA122-PseudoTGC      | -0.19 | 2.61  | 0.08 | 0.77 | 0.99 |
| tRF3      | chr16.tRNA31-PseudoTGG-tRF3 | 0.16  | 1.95  | 0.08 | 0.77 | 0.99 |
| tRF5      | chr6.tRNA114-ArgCCG-tRF5    | -0.16 | 1.61  | 0.08 | 0.77 | 0.99 |
| tRNA      | chr6.tRNA87-GluCTC          | -0.07 | 15.82 | 0.08 | 0.77 | 0.99 |
| piRNA     | piR-37213                   | 0.23  | 1.60  | 0.08 | 0.77 | 0.99 |
| mir-5p3pr | hsa-miR-618                 | 0.15  | 2.72  | 0.08 | 0.78 | 0.99 |
| tRF3      | chr17.tRNA33-PseudoTTG-tRF3 | 0.12  | 4.41  | 0.08 | 0.78 | 0.99 |
| snoRNA    | HBII-135                    | 0.16  | 5.06  | 0.08 | 0.78 | 0.99 |

|           |                            |       |      |      |      |      |
|-----------|----------------------------|-------|------|------|------|------|
| rRNA      | 5S-L946                    | -0.07 | 9.07 | 0.08 | 0.78 | 0.99 |
| rRNA      | 5S-L746                    | -0.17 | 2.21 | 0.08 | 0.78 | 0.99 |
| scRNA     | BC200-L13                  | 0.16  | 2.84 | 0.08 | 0.78 | 0.99 |
| mir-5p    | hsa-miR-877-5p             | -0.14 | 2.35 | 0.07 | 0.79 | 0.99 |
| tRF3      | chr20.tRNA4-PseudoTAA-tRF3 | 0.10  | 4.75 | 0.07 | 0.79 | 0.99 |
| rRNA      | 5S-L983                    | -0.12 | 1.77 | 0.07 | 0.79 | 0.99 |
| mir-5p    | hsa-miR-744-5p             | -0.08 | 6.54 | 0.07 | 0.79 | 0.99 |
| piRNA     | piR-38600                  | -0.15 | 3.94 | 0.07 | 0.79 | 0.99 |
| rRNA      | LSU-rRNA_Hsa-L48           | 0.22  | 1.64 | 0.07 | 0.79 | 0.99 |
| scRNA     | HY3-L492                   | 0.16  | 1.45 | 0.07 | 0.79 | 0.99 |
| snRNA     | U2-L388                    | 0.12  | 3.41 | 0.07 | 0.79 | 0.99 |
| scRNA     | BC200-L91                  | -0.19 | 1.97 | 0.07 | 0.79 | 0.99 |
| rRNA      | LSU-rRNA_Hsa-L165          | -0.09 | 7.53 | 0.07 | 0.79 | 0.99 |
| tRF5      | chr9.tRNA6-AspGTC-tRF5     | 0.12  | 2.90 | 0.07 | 0.79 | 0.99 |
| tRNA      | chr6.tRNA148-SerTGA        | -0.18 | 3.56 | 0.07 | 0.79 | 0.99 |
| tRNA      | chr8.tRNA5-TyrGTA          | -0.24 | 1.91 | 0.07 | 0.79 | 0.99 |
| mir-3p    | hsa-miR-330-3p             | 0.09  | 3.77 | 0.07 | 0.79 | 0.99 |
| snoRNA    | HBII-99                    | -0.14 | 4.91 | 0.07 | 0.79 | 0.99 |
| snoRNA    | HBI-61                     | -0.19 | 3.49 | 0.07 | 0.79 | 0.99 |
| rRNA      | LSU-rRNA_Hsa-L164          | -0.08 | 5.97 | 0.07 | 0.79 | 0.99 |
| piRNA     | piR-35548-L4               | -0.09 | 7.22 | 0.07 | 0.80 | 0.99 |
| mir-3p    | hsa-miR-1185-1-3p          | -0.20 | 2.25 | 0.07 | 0.80 | 0.99 |
| mir-5p    | hsa-miR-196b-5p            | 0.14  | 2.79 | 0.07 | 0.80 | 0.99 |
| piRNA     | piR-33650                  | 0.13  | 3.05 | 0.06 | 0.80 | 0.99 |
| snoRNA    | U24                        | -0.19 | 2.09 | 0.06 | 0.80 | 0.99 |
| scRNA     | BC200-L12                  | -0.16 | 1.72 | 0.06 | 0.80 | 0.99 |
| piRNA     | piR-32678                  | 0.07  | 6.09 | 0.06 | 0.80 | 0.99 |
| mir-5p3pr | hsa-miR-1180               | -0.09 | 4.05 | 0.06 | 0.80 | 0.99 |
| rRNA      | LSU-rRNA_Hsa-L39           | 0.08  | 7.57 | 0.06 | 0.80 | 0.99 |
| mir-5p    | hsa-miR-15b-5p             | -0.10 | 2.72 | 0.06 | 0.80 | 0.99 |
| mir-5p    | hsa-miR-106a-5p            | 0.11  | 2.83 | 0.06 | 0.81 | 0.99 |
| scRNA     | BC200-L82                  | 0.14  | 1.75 | 0.06 | 0.81 | 0.99 |
| snoRNA    | U23                        | 0.17  | 1.46 | 0.06 | 0.81 | 0.99 |
| snoRNA    | ACA20                      | -0.16 | 2.30 | 0.06 | 0.81 | 0.99 |
| mir-3p    | hsa-miR-424-3p             | -0.09 | 4.70 | 0.06 | 0.81 | 0.99 |
| mir-3p    | hsa-miR-125a-3p            | 0.12  | 3.83 | 0.06 | 0.81 | 0.99 |
| snoRNA    | U76                        | 0.16  | 2.36 | 0.06 | 0.81 | 0.99 |
| mir-5p3pr | hsa-miR-4488               | -0.20 | 1.35 | 0.06 | 0.81 | 0.99 |
| tRNA      | chr2.tRNA23-GlnTTG         | -0.14 | 3.06 | 0.06 | 0.81 | 0.99 |
| scRNA     | HY4-L138                   | -0.06 | 8.42 | 0.06 | 0.81 | 0.99 |
| mir-5p3pr | hsa-miR-3928               | -0.17 | 1.51 | 0.06 | 0.81 | 0.99 |
| rRNA      | 5S-L189                    | 0.13  | 2.24 | 0.06 | 0.81 | 0.99 |
| mir-5p    | hsa-miR-15a-5p             | -0.08 | 3.78 | 0.06 | 0.81 | 0.99 |

|          |                          |       |      |      |      |      |
|----------|--------------------------|-------|------|------|------|------|
| rRNA     | 5S-L317                  | 0.19  | 1.26 | 0.06 | 0.81 | 0.99 |
| rRNA     | 5S-L804                  | 0.07  | 4.97 | 0.06 | 0.81 | 0.99 |
| mir-5p   | hsa-miR-155-5p           | -0.06 | 4.35 | 0.05 | 0.81 | 0.99 |
| snRNA    | U3-L18                   | -0.12 | 6.00 | 0.05 | 0.81 | 0.99 |
| snRNA    | U2-L218                  | -0.17 | 1.63 | 0.05 | 0.82 | 0.99 |
| piRNA    | piR-36707                | 0.09  | 5.03 | 0.05 | 0.82 | 0.99 |
| tRF5     | chr1.tRNA118-HisGTG-tRF5 | 0.16  | 1.83 | 0.05 | 0.82 | 0.99 |
| snoRNA   | ACA8                     | 0.17  | 2.21 | 0.05 | 0.82 | 0.99 |
| scRNA    | HY1-L167                 | 0.13  | 2.48 | 0.05 | 0.82 | 0.99 |
| scRNA    | HY4-L98                  | -0.05 | 9.97 | 0.05 | 0.82 | 0.99 |
| tRF3     | chr22.tRNA1-SeCTCA-tRF3  | -0.12 | 4.56 | 0.05 | 0.82 | 0.99 |
| mir-3p   | hsa-miR-146b-3p          | -0.11 | 2.42 | 0.05 | 0.82 | 0.99 |
| snoRNA   | HBII-180C                | -0.11 | 4.12 | 0.05 | 0.82 | 0.99 |
| tRNA     | chr2.tRNA1-PseudoCCC     | -0.06 | 5.86 | 0.05 | 0.82 | 0.99 |
| tRNA     | chr2.tRNA25-PseudoCTC    | -0.06 | 8.69 | 0.05 | 0.83 | 0.99 |
| rRNA     | 5S-L103                  | 0.11  | 3.03 | 0.05 | 0.83 | 0.99 |
| piRNA    | piR-39361                | 0.18  | 2.73 | 0.05 | 0.83 | 0.99 |
| tRNA     | chr13.tRNA2-PseudoCTC    | -0.06 | 4.77 | 0.05 | 0.83 | 0.99 |
| snRNA    | U4-L41                   | 0.12  | 2.29 | 0.05 | 0.83 | 0.99 |
| mir-5p   | hsa-let-7a-5p            | 0.15  | 2.02 | 0.05 | 0.83 | 0.99 |
| scRNA    | BC200-L10                | -0.11 | 2.65 | 0.05 | 0.83 | 0.99 |
| snRNA    | U1-L8                    | -0.09 | 6.14 | 0.05 | 0.83 | 0.99 |
| scRNA    | BC200-L120               | 0.12  | 1.92 | 0.05 | 0.83 | 0.99 |
| rRNA     | LSU-rRNA_Hsa-L161        | -0.11 | 1.84 | 0.05 | 0.83 | 0.99 |
| tRNA     | chr6.tRNA14-TyrGTA       | 0.13  | 1.90 | 0.05 | 0.83 | 0.99 |
| scRNA    | HY1-L302                 | 0.08  | 2.49 | 0.04 | 0.83 | 0.99 |
| tRNA     | chrX.tRNA2-LeuTAA        | 0.15  | 1.38 | 0.04 | 0.83 | 0.99 |
| rRNA     | 5S-L344                  | 0.09  | 2.37 | 0.04 | 0.83 | 0.99 |
| rRNA     | 5S-L731                  | 0.10  | 1.51 | 0.04 | 0.83 | 0.99 |
| mir-3p   | hsa-miR-570-3p           | 0.10  | 1.85 | 0.04 | 0.83 | 0.99 |
| tRNA     | chr6.tRNA123-SerGCT      | -0.11 | 2.23 | 0.04 | 0.84 | 0.99 |
| snoRNA   | U44                      | 0.10  | 6.36 | 0.04 | 0.84 | 0.99 |
| tRF5     | chr6.tRNA129-MetCAT-tRF5 | -0.13 | 2.00 | 0.04 | 0.84 | 0.99 |
| scRNA    | BC200-L31                | 0.16  | 1.42 | 0.04 | 0.84 | 0.99 |
| tRNA     | chr6.tRNA175-SerGCT      | 0.19  | 2.06 | 0.04 | 0.84 | 0.99 |
| mir-5p   | hsa-miR-432-5p           | -0.10 | 5.13 | 0.04 | 0.84 | 0.99 |
| mir-5p3p | hsa-miR-1250             | -0.13 | 1.50 | 0.04 | 0.84 | 0.99 |
| mir-5p   | hsa-miR-454-5p           | 0.08  | 2.36 | 0.04 | 0.84 | 0.99 |
| scRNA    | HY4-L35                  | 0.05  | 7.15 | 0.04 | 0.84 | 0.99 |
| rRNA     | 5S-L253                  | -0.07 | 3.20 | 0.04 | 0.84 | 0.99 |
| tRF3     | chr1.tRNA55-LysTTT-tRF3  | -0.11 | 2.49 | 0.04 | 0.84 | 0.99 |
| mir-5p   | hsa-miR-424-5p           | -0.11 | 2.86 | 0.04 | 0.84 | 0.99 |
| mir-3p   | hsa-miR-15b-3p           | -0.09 | 3.61 | 0.04 | 0.84 | 0.99 |

|           |                             |       |       |      |      |      |
|-----------|-----------------------------|-------|-------|------|------|------|
| tRNA      | chr1.tRNA54-LysTTT          | -0.06 | 8.24  | 0.04 | 0.84 | 0.99 |
| snoRNA    | snR39B                      | -0.09 | 5.72  | 0.04 | 0.84 | 0.99 |
| tRF5      | chr1.tRNA132-PseudoCAC-tRF5 | -0.13 | 2.10  | 0.04 | 0.84 | 0.99 |
| mir-5p    | hsa-miR-4433-5p             | -0.09 | 5.15  | 0.04 | 0.84 | 0.99 |
| piRNA     | piR-35468                   | -0.10 | 4.14  | 0.04 | 0.85 | 0.99 |
| mir-3p    | hsa-miR-23a-3p              | -0.07 | 6.59  | 0.04 | 0.85 | 0.99 |
| rRNA      | LSU-rRNA_Hsa-L305           | -0.08 | 5.25  | 0.04 | 0.85 | 0.99 |
| scRNA     | BC200-L148                  | -0.15 | 2.11  | 0.04 | 0.85 | 0.99 |
| scRNA     | HY4-L162                    | 0.10  | 1.65  | 0.04 | 0.85 | 0.99 |
| tRNA      | chr17.tRNA18-ArgCCT         | 0.12  | 1.71  | 0.04 | 0.85 | 0.99 |
| rRNA      | LSU-rRNA_Hsa-L60            | -0.06 | 12.44 | 0.04 | 0.85 | 0.99 |
| rRNA      | 5S-L191                     | -0.07 | 4.70  | 0.04 | 0.85 | 0.99 |
| mir-3p    | hsa-miR-2115-3p             | -0.17 | 1.61  | 0.04 | 0.85 | 0.99 |
| mir-5p    | hsa-miR-93-5p               | 0.06  | 7.11  | 0.04 | 0.85 | 0.99 |
| mir-3p    | hsa-miR-340-3p              | -0.08 | 4.29  | 0.04 | 0.85 | 0.99 |
| tRNA      | chr9.tRNA4-ArgTCT           | 0.13  | 1.63  | 0.04 | 0.85 | 0.99 |
| mir-3p    | hsa-miR-3605-3p             | 0.12  | 2.12  | 0.03 | 0.85 | 0.99 |
| rRNA      | LSU-rRNA_Hsa-L109           | -0.09 | 1.47  | 0.03 | 0.85 | 0.99 |
| mir-3p    | hsa-miR-24-3p               | 0.05  | 8.44  | 0.03 | 0.86 | 0.99 |
| mir-5p    | hsa-miR-369-5p              | 0.17  | 1.73  | 0.03 | 0.86 | 0.99 |
| mir-5p3pr | hsa-miR-3138                | 0.16  | 1.71  | 0.03 | 0.86 | 0.99 |
| mir-5p    | hsa-miR-1307-5p             | 0.15  | 1.42  | 0.03 | 0.86 | 0.99 |
| rRNA      | LSU-rRNA_Hsa-L189           | 0.06  | 4.24  | 0.03 | 0.86 | 0.99 |
| scRNA     | HY4-L111                    | 0.04  | 9.50  | 0.03 | 0.86 | 0.99 |
| scRNA     | HY3-L432                    | 0.09  | 1.48  | 0.03 | 0.86 | 0.99 |
| piRNA     | piR-33082                   | 0.05  | 7.18  | 0.03 | 0.86 | 0.99 |
| scRNA     | HY4-L159                    | -0.05 | 4.46  | 0.03 | 0.86 | 0.99 |
| rRNA      | 5S-L107                     | 0.05  | 10.07 | 0.03 | 0.86 | 0.99 |
| tRNA      | chr5.tRNA4-ValAAC           | -0.10 | 2.29  | 0.03 | 0.86 | 0.99 |
| rRNA      | LSU-rRNA_Hsa-L140           | 0.08  | 4.43  | 0.03 | 0.86 | 0.99 |
| mir-5p    | hsa-miR-574-5p              | -0.07 | 4.85  | 0.03 | 0.86 | 0.99 |
| tRF5      | chr1.tRNA125-PseudoGTT-tRF5 | 0.12  | 1.49  | 0.03 | 0.86 | 0.99 |
| tRF5      | chr1.tRNA109-PseudoGTT-tRF5 | -0.11 | 1.70  | 0.03 | 0.87 | 0.99 |
| piRNA     | piR-52416                   | 0.15  | 1.72  | 0.03 | 0.87 | 0.99 |
| mir-3p    | hsa-miR-374a-3p             | 0.05  | 3.84  | 0.03 | 0.87 | 0.99 |
| rRNA      | 5S-L111                     | 0.04  | 10.31 | 0.03 | 0.87 | 0.99 |
| mir-3p    | hsa-miR-130b-3p             | 0.07  | 2.46  | 0.03 | 0.87 | 0.99 |
| tRNA      | chr17.tRNA12-TrpCCA         | -0.09 | 2.18  | 0.03 | 0.87 | 0.99 |
| mir-3p    | hsa-miR-130a-3p             | 0.06  | 3.58  | 0.03 | 0.87 | 0.99 |
| scRNA     | HY3-L208                    | -0.11 | 1.34  | 0.03 | 0.87 | 0.99 |
| mir-3p    | hsa-miR-221-3p              | 0.05  | 7.16  | 0.03 | 0.87 | 0.99 |
| mir-5p3pr | hsa-miR-494                 | -0.12 | 1.75  | 0.03 | 0.87 | 0.99 |
| mir-3p    | hsa-miR-30d-3p              | -0.09 | 1.67  | 0.03 | 0.87 | 0.99 |

|           |                          |       |       |      |      |      |
|-----------|--------------------------|-------|-------|------|------|------|
| tRF3      | chr14.tRNA10-IleAAT-tRF3 | -0.08 | 2.47  | 0.03 | 0.87 | 0.99 |
| rRNA      | 5S-L877                  | 0.07  | 2.33  | 0.03 | 0.87 | 0.99 |
| scRNA     | HY4-L102                 | -0.04 | 8.16  | 0.03 | 0.87 | 0.99 |
| tRNA      | chr17.tRNA36-ThrAGT      | -0.08 | 2.02  | 0.03 | 0.87 | 0.99 |
| mir-5p3pr | hsa-miR-484              | 0.05  | 6.24  | 0.02 | 0.88 | 0.99 |
| mir-5p3pr | hsa-miR-451b             | -0.08 | 2.85  | 0.02 | 0.88 | 0.99 |
| snoRNA    | HBII-99B                 | 0.11  | 1.87  | 0.02 | 0.88 | 0.99 |
| tRNA      | chr6.tRNA11-IleAAT       | -0.09 | 8.31  | 0.02 | 0.88 | 0.99 |
| mir-5p    | hsa-miR-1255b-5p-L2      | -0.09 | 1.62  | 0.02 | 0.88 | 0.99 |
| rRNA      | 5S-L1179                 | -0.07 | 1.46  | 0.02 | 0.88 | 0.99 |
| scRNA     | BC200-L128               | 0.07  | 2.65  | 0.02 | 0.88 | 0.99 |
| mir-5p    | hsa-miR-4732-5p          | -0.07 | 3.27  | 0.02 | 0.88 | 0.99 |
| snRNA     | U2-L825                  | -0.09 | 3.19  | 0.02 | 0.88 | 0.99 |
| mir-3p    | hsa-miR-3150b-3p         | -0.11 | 1.47  | 0.02 | 0.88 | 0.99 |
| scRNA     | BC200-L19                | 0.09  | 1.37  | 0.02 | 0.88 | 0.99 |
| tRF5      | chr20.tRNA6-LeuAAG-tRF5  | -0.06 | 3.01  | 0.02 | 0.89 | 0.99 |
| mir-5p    | hsa-miR-3679-5p          | -0.07 | 2.94  | 0.02 | 0.89 | 0.99 |
| rRNA      | LSU-rRNA_Hsa-L193        | -0.05 | 7.16  | 0.02 | 0.89 | 0.99 |
| tRNA      | chr19.tRNA13-ValCAC      | -0.05 | 4.33  | 0.02 | 0.89 | 0.99 |
| scRNA     | HY3-L84                  | -0.04 | 6.39  | 0.02 | 0.89 | 0.99 |
| scRNA     | HY4-L135                 | -0.03 | 18.67 | 0.02 | 0.89 | 0.99 |
| mir-3p    | hsa-miR-199b-3p          | -0.04 | 7.58  | 0.02 | 0.89 | 0.99 |
| mir-5p    | hsa-miR-30e-5p           | 0.04  | 8.13  | 0.02 | 0.89 | 0.99 |
| tRNA      | chr6.tRNA73-ArgCCG       | -0.08 | 2.37  | 0.02 | 0.89 | 0.99 |
| rRNA      | 5S-L586                  | 0.07  | 2.14  | 0.02 | 0.89 | 0.99 |
| scRNA     | HY1-L190                 | 0.08  | 2.42  | 0.02 | 0.89 | 0.99 |
| snoRNA    | ACA3                     | -0.07 | 2.48  | 0.02 | 0.89 | 0.99 |
| rRNA      | LSU-rRNA_Hsa-L365        | 0.08  | 1.60  | 0.02 | 0.89 | 0.99 |
| mir-5p3pr | hsa-miR-4485             | 0.06  | 4.29  | 0.02 | 0.89 | 0.99 |
| scRNA     | HY4-L66                  | 0.03  | 7.15  | 0.02 | 0.89 | 0.99 |
| snRNA     | U7-L212                  | -0.08 | 2.30  | 0.02 | 0.89 | 0.99 |
| scRNA     | HY4-L32                  | 0.04  | 3.65  | 0.02 | 0.90 | 0.99 |
| rRNA      | 5S-L578                  | 0.08  | 2.37  | 0.02 | 0.90 | 0.99 |
| tRNA      | chr16.tRNA4-ProAGG       | -0.06 | 2.50  | 0.02 | 0.90 | 0.99 |
| scRNA     | BC200-L156               | 0.05  | 2.60  | 0.02 | 0.90 | 0.99 |
| piRNA     | piR-43995-L4             | -0.04 | 6.52  | 0.02 | 0.90 | 0.99 |
| snoRNA    | ACA46                    | -0.10 | 2.20  | 0.02 | 0.90 | 0.99 |
| rRNA      | LSU-rRNA_Hsa-L147        | 0.11  | 2.70  | 0.02 | 0.90 | 0.99 |
| rRNA      | 5S-L819                  | 0.08  | 2.01  | 0.02 | 0.90 | 0.99 |
| tRF5      | chr8.tRNA12-TyrGTA-tRF5  | 0.15  | 2.21  | 0.02 | 0.90 | 0.99 |
| scRNA     | HY5-L8                   | 0.05  | 3.89  | 0.02 | 0.90 | 0.99 |
| tRNA      | chr6.tRNA131-GlnCTG      | 0.09  | 1.62  | 0.02 | 0.90 | 0.99 |
| piRNA     | piR-43772-L2             | -0.03 | 6.19  | 0.02 | 0.90 | 0.99 |

|           |                       |       |      |      |      |      |
|-----------|-----------------------|-------|------|------|------|------|
| snRNA     | U6-L1308              | 0.07  | 2.67 | 0.02 | 0.90 | 0.99 |
| scRNA     | HY4-L68               | 0.04  | 4.03 | 0.02 | 0.90 | 0.99 |
| mir-3p    | hsa-miR-197-3p        | -0.07 | 2.69 | 0.02 | 0.90 | 0.99 |
| mir-3p    | hsa-miR-671-3p        | 0.05  | 4.05 | 0.02 | 0.90 | 0.99 |
| mir-5p3pr | hsa-miR-320d-L2       | 0.05  | 3.63 | 0.02 | 0.90 | 0.99 |
| mir-3p    | hsa-miR-708-3p        | 0.12  | 1.52 | 0.01 | 0.90 | 0.99 |
| mir-5p3pr | hsa-miR-4473          | 0.07  | 1.40 | 0.01 | 0.90 | 0.99 |
| snoRNA    | U104                  | -0.05 | 7.46 | 0.01 | 0.91 | 0.99 |
| rRNA      | 5S-L621               | 0.07  | 1.23 | 0.01 | 0.91 | 0.99 |
| piRNA     | piR-33082-L2          | 0.07  | 1.79 | 0.01 | 0.91 | 0.99 |
| mir-5p    | hsa-miR-425-5p        | -0.04 | 5.12 | 0.01 | 0.91 | 0.99 |
| rRNA      | LSU-rRNA_Hsa-L247     | 0.06  | 1.53 | 0.01 | 0.91 | 0.99 |
| mir-3p    | hsa-miR-548g-3p       | -0.07 | 2.15 | 0.01 | 0.91 | 0.99 |
| scRNA     | BC200-L108            | 0.07  | 2.02 | 0.01 | 0.91 | 0.99 |
| mir-5p    | hsa-miR-183-5p        | 0.04  | 7.53 | 0.01 | 0.91 | 0.99 |
| piRNA     | piR-43325-L7          | 0.06  | 3.82 | 0.01 | 0.91 | 0.99 |
| snoRNA    | U43                   | -0.06 | 4.95 | 0.01 | 0.91 | 0.99 |
| tRNA      | chr17.tRNA31-AsnGTT   | 0.05  | 2.61 | 0.01 | 0.91 | 0.99 |
| scRNA     | HY3-L62               | 0.09  | 1.84 | 0.01 | 0.91 | 0.99 |
| rRNA      | LSU-rRNA_Hsa-L230     | 0.04  | 3.37 | 0.01 | 0.91 | 0.99 |
| mir-5p3pr | hsa-miR-326           | -0.06 | 1.98 | 0.01 | 0.91 | 0.99 |
| scRNA     | HY1-L25               | -0.06 | 1.88 | 0.01 | 0.91 | 0.99 |
| rRNA      | LSU-rRNA_Hsa-L151     | -0.05 | 3.13 | 0.01 | 0.91 | 0.99 |
| tRNA      | chr20.tRNA3-PseudoCAC | 0.06  | 1.30 | 0.01 | 0.91 | 0.99 |
| piRNA     | piR-60565-L9          | 0.07  | 1.87 | 0.01 | 0.91 | 0.99 |
| snoRNA    | ACA7                  | 0.07  | 2.30 | 0.01 | 0.91 | 0.99 |
| snRNA     | U2-L285               | 0.07  | 2.96 | 0.01 | 0.91 | 0.99 |
| scRNA     | HY4-L15               | 0.02  | 7.92 | 0.01 | 0.91 | 0.99 |
| scRNA     | HY3-L512              | 0.06  | 2.05 | 0.01 | 0.91 | 0.99 |
| rRNA      | 5S-L515               | 0.05  | 2.06 | 0.01 | 0.91 | 0.99 |
| scRNA     | HY1-L276              | -0.03 | 3.15 | 0.01 | 0.91 | 0.99 |
| mir-3p    | hsa-let-7f-1-3p       | -0.10 | 1.62 | 0.01 | 0.91 | 0.99 |
| snoRNA    | HBII-180A             | 0.07  | 2.03 | 0.01 | 0.92 | 0.99 |
| scRNA     | HY4-L97               | 0.02  | 8.74 | 0.01 | 0.92 | 0.99 |
| snoRNA    | U15A                  | -0.11 | 2.09 | 0.01 | 0.92 | 0.99 |
| tRNA      | chr1.tRNA134-GluTTC   | 0.02  | 7.45 | 0.01 | 0.92 | 0.99 |
| mir-5p    | hsa-miR-9-5p-L3       | -0.05 | 3.09 | 0.01 | 0.92 | 0.99 |
| mir-5p    | hsa-miR-125b-5p-L2    | 0.05  | 3.27 | 0.01 | 0.92 | 0.99 |
| scRNA     | HY4-L107              | 0.02  | 9.96 | 0.01 | 0.92 | 0.99 |
| snRNA     | U5-L67                | -0.04 | 7.03 | 0.01 | 0.92 | 0.99 |
| rRNA      | LSU-rRNA_Hsa-L341     | 0.05  | 1.93 | 0.01 | 0.92 | 0.99 |
| snoRNA    | HBII-85-10            | -0.04 | 1.77 | 0.01 | 0.92 | 0.99 |
| rRNA      | 5S-L1114              | 0.05  | 1.68 | 0.01 | 0.92 | 0.99 |



|           |                            |       |       |      |      |      |
|-----------|----------------------------|-------|-------|------|------|------|
| piRNA     | piR-50811                  | 0.04  | 3.42  | 0.01 | 0.92 | 0.99 |
| scRNA     | HY4-L16                    | 0.03  | 3.92  | 0.01 | 0.92 | 0.99 |
| tRF3      | chr17.tRNA1-Pseudo???-tRF3 | 0.05  | 2.09  | 0.01 | 0.92 | 0.99 |
| rRNA      | LSU-rRNA_Hsa-L178          | -0.05 | 3.24  | 0.01 | 0.92 | 0.99 |
| tRNA      | chr14.tRNA2-LeuTAG         | 0.07  | 2.26  | 0.01 | 0.92 | 0.99 |
| scRNA     | HY1-L321                   | 0.03  | 4.61  | 0.01 | 0.92 | 0.99 |
| scRNA     | HY4-L160                   | -0.02 | 7.28  | 0.01 | 0.92 | 0.99 |
| rRNA      | LSU-rRNA_Hsa-L382          | 0.02  | 13.70 | 0.01 | 0.92 | 0.99 |
| mir-5p3pr | hsa-miR-181d               | -0.03 | 3.90  | 0.01 | 0.92 | 0.99 |
| scRNA     | HY4-L10                    | 0.02  | 10.20 | 0.01 | 0.93 | 0.99 |
| scRNA     | HY4-L6                     | 0.03  | 3.98  | 0.01 | 0.93 | 0.99 |
| mir-3p    | hsa-miR-502-3p             | -0.05 | 2.26  | 0.01 | 0.93 | 0.99 |
| snoRNA    | U106                       | 0.05  | 1.86  | 0.01 | 0.93 | 0.99 |
| mir-5p    | hsa-miR-450b-5p            | 0.03  | 5.25  | 0.01 | 0.93 | 0.99 |
| rRNA      | 5S-L61                     | 0.04  | 2.67  | 0.01 | 0.93 | 0.99 |
| scRNA     | BC200-L161                 | 0.06  | 1.53  | 0.01 | 0.93 | 0.99 |
| tRF3      | chr16.tRNA28-ProTGG-tRF3   | 0.06  | 1.99  | 0.01 | 0.93 | 0.99 |
| scRNA     | HY4-L43                    | -0.04 | 2.22  | 0.01 | 0.93 | 0.99 |
| mir-3p    | hsa-miR-99b-3p             | -0.04 | 3.53  | 0.01 | 0.93 | 0.99 |
| scRNA     | HY1-L171                   | -0.03 | 1.68  | 0.01 | 0.93 | 0.99 |
| rRNA      | LSU-rRNA_Hsa-L2            | -0.04 | 9.24  | 0.01 | 0.93 | 0.99 |
| mir-5p    | hsa-miR-126-5p             | 0.03  | 6.05  | 0.01 | 0.93 | 0.99 |
| tRNA      | chr6.tRNA4-ArgTCG          | 0.06  | 2.79  | 0.01 | 0.93 | 0.99 |
| piRNA     | piR-51119                  | -0.07 | 2.10  | 0.01 | 0.93 | 0.99 |
| mir-5p    | hsa-miR-30b-5p             | -0.04 | 2.47  | 0.01 | 0.94 | 0.99 |
| piRNA     | piR-33151-L12              | -0.03 | 2.94  | 0.01 | 0.94 | 0.99 |
| mir-5p    | hsa-miR-22-5p              | -0.03 | 3.80  | 0.01 | 0.94 | 0.99 |
| snoRNA    | U46                        | -0.05 | 4.48  | 0.01 | 0.94 | 0.99 |
| mir-5p3pr | hsa-miR-4326               | -0.06 | 1.51  | 0.01 | 0.94 | 0.99 |
| tRNA      | chr14.tRNA3-ProTGG         | -0.03 | 3.97  | 0.01 | 0.94 | 0.99 |
| mir-3p    | hsa-miR-27a-3p             | -0.02 | 10.82 | 0.01 | 0.94 | 0.99 |
| scRNA     | HY4-L14                    | -0.02 | 8.83  | 0.01 | 0.94 | 0.99 |
| tRNA      | chr1.tRNA119-LysCTT        | -0.02 | 7.12  | 0.01 | 0.94 | 0.99 |
| tRNA      | chr6.tRNA38-IleAAT         | -0.06 | 3.15  | 0.01 | 0.94 | 0.99 |
| rRNA      | 5S-L762                    | -0.02 | 4.86  | 0.01 | 0.94 | 0.99 |
| mir-3p    | hsa-miR-30a-3p             | 0.02  | 5.31  | 0.01 | 0.94 | 0.99 |
| snRNA     | U6-L440                    | 0.10  | 1.97  | 0.01 | 0.94 | 0.99 |
| tRF3      | chr19.tRNA9-PseudoTTT-tRF3 | 0.07  | 1.65  | 0.01 | 0.94 | 0.99 |
| rRNA      | 5S-L100                    | 0.04  | 2.88  | 0.01 | 0.94 | 0.99 |
| scRNA     | HY4-L87                    | -0.02 | 9.96  | 0.01 | 0.94 | 0.99 |
| mir-3p    | hsa-miR-181a-3p            | -0.04 | 2.62  | 0.01 | 0.94 | 0.99 |
| scRNA     | HY4-L46                    | -0.02 | 9.09  | 0.01 | 0.94 | 0.99 |
| snoRNA    | U36B                       | -0.10 | 1.73  | 0.00 | 0.94 | 0.99 |

|           |                          |       |       |      |      |      |
|-----------|--------------------------|-------|-------|------|------|------|
| snoRNA    | U58B                     | 0.03  | 4.91  | 0.00 | 0.94 | 0.99 |
| tRF5      | chr6.tRNA130-GlnTTG-tRF5 | 0.03  | 1.89  | 0.00 | 0.94 | 0.99 |
| mir-5p    | hsa-miR-26b-5p           | -0.02 | 8.15  | 0.00 | 0.95 | 0.99 |
| mir-3p    | hsa-miR-106b-3p          | 0.02  | 7.66  | 0.00 | 0.95 | 0.99 |
| scRNA     | BC200-L68                | -0.04 | 2.33  | 0.00 | 0.95 | 0.99 |
| mir-5p    | hsa-miR-379-5p           | -0.03 | 5.35  | 0.00 | 0.95 | 0.99 |
| mir-5p3pr | hsa-miR-378e             | -0.05 | 1.49  | 0.00 | 0.95 | 0.99 |
| tRF3      | chrX.tRNA2-LeuTAA-tRF3   | 0.04  | 1.82  | 0.00 | 0.95 | 0.99 |
| rRNA      | 5S-L472                  | 0.03  | 2.70  | 0.00 | 0.95 | 0.99 |
| scRNA     | HY4-L153                 | -0.02 | 8.62  | 0.00 | 0.95 | 0.99 |
| tRNA      | chr6.tRNA28-IleAAT       | -0.06 | 3.35  | 0.00 | 0.95 | 0.99 |
| mir-5p3pr | hsa-miR-5096             | -0.15 | 2.21  | 0.00 | 0.95 | 0.99 |
| tRF5      | chr17.tRNA26-CysGCA-tRF5 | -0.02 | 5.39  | 0.00 | 0.95 | 0.99 |
| mir-5p3pr | hsa-miR-378c             | -0.02 | 5.35  | 0.00 | 0.95 | 0.99 |
| piRNA     | piR-34536                | -0.03 | 5.56  | 0.00 | 0.95 | 0.99 |
| mir-3p    | hsa-miR-144-3p           | 0.02  | 5.77  | 0.00 | 0.95 | 0.99 |
| scRNA     | HY4-L53                  | 0.02  | 3.75  | 0.00 | 0.95 | 0.99 |
| rRNA      | LSU-rRNA_Hsa-L4          | -0.02 | 8.09  | 0.00 | 0.95 | 0.99 |
| mir-5p    | hsa-miR-142-5p           | -0.02 | 5.73  | 0.00 | 0.95 | 0.99 |
| mir-3p    | hsa-miR-425-3p           | 0.02  | 4.14  | 0.00 | 0.95 | 0.99 |
| piRNA     | piR-52041                | 0.03  | 1.91  | 0.00 | 0.95 | 0.99 |
| rRNA      | 5S-L930                  | 0.04  | 1.75  | 0.00 | 0.95 | 0.99 |
| snoRNA    | HBII-82B                 | 0.04  | 2.38  | 0.00 | 0.96 | 0.99 |
| tRNA      | chr1.tRNA106-HisGTG      | -0.02 | 3.36  | 0.00 | 0.96 | 0.99 |
| rRNA      | 5S-L1009                 | 0.03  | 2.50  | 0.00 | 0.96 | 0.99 |
| rRNA      | LSU-rRNA_Hsa-L200        | -0.03 | 2.74  | 0.00 | 0.96 | 0.99 |
| snoRNA    | U79                      | -0.07 | 1.72  | 0.00 | 0.96 | 0.99 |
| mir-5p    | hsa-miR-301a-5p          | -0.05 | 1.39  | 0.00 | 0.96 | 0.99 |
| scRNA     | HY4-L28                  | 0.01  | 6.48  | 0.00 | 0.96 | 0.99 |
| rRNA      | LSU-rRNA_Hsa-L383        | -0.01 | 14.16 | 0.00 | 0.96 | 0.99 |
| mir-3p    | hsa-miR-103a-3p-L2       | -0.02 | 3.33  | 0.00 | 0.96 | 0.99 |
| mir-3p    | hsa-miR-4677-3p          | -0.03 | 1.78  | 0.00 | 0.96 | 0.99 |
| mir-5p3pr | hsa-miR-320a             | 0.01  | 11.48 | 0.00 | 0.96 | 0.99 |
| scRNA     | BC200-L8                 | 0.02  | 2.74  | 0.00 | 0.97 | 0.99 |
| piRNA     | piR-53659                | -0.14 | 2.18  | 0.00 | 0.97 | 0.99 |
| rRNA      | LSU-rRNA_Hsa-L283        | 0.03  | 2.11  | 0.00 | 0.97 | 0.99 |
| mir-3p    | hsa-miR-200c-3p          | 0.02  | 2.75  | 0.00 | 0.97 | 0.99 |
| rRNA      | 5S-L137                  | 0.01  | 1.95  | 0.00 | 0.97 | 0.99 |
| scRNA     | HY1-L78                  | -0.05 | 1.39  | 0.00 | 0.97 | 0.99 |
| tRF5      | chr1.tRNA130-ValCAC-tRF5 | 0.02  | 2.38  | 0.00 | 0.97 | 0.99 |
| scRNA     | BC200-L60                | -0.03 | 2.38  | 0.00 | 0.97 | 0.99 |
| snoRNA    | ACA54                    | -0.03 | 1.60  | 0.00 | 0.97 | 0.99 |
| mir-5p3pr | hsa-miR-1299             | -0.05 | 2.07  | 0.00 | 0.97 | 0.99 |

|           |                         |       |       |      |      |      |
|-----------|-------------------------|-------|-------|------|------|------|
| rRNA      | 5S-L21                  | 0.01  | 2.71  | 0.00 | 0.97 | 0.99 |
| scRNA     | HY4-L54                 | -0.01 | 6.72  | 0.00 | 0.97 | 0.99 |
| mir-5p3pr | hsa-miR-651             | 0.01  | 3.29  | 0.00 | 0.97 | 0.99 |
| scRNA     | BC200-L126              | 0.01  | 3.33  | 0.00 | 0.98 | 0.99 |
| mir-5p3pr | hsa-miR-128             | 0.01  | 8.32  | 0.00 | 0.98 | 0.99 |
| tRF3      | chr2.tRNA21-SerTGA-tRF3 | 0.01  | 2.33  | 0.00 | 0.98 | 0.99 |
| mir-5p3pr | hsa-miR-103b-L2         | -0.01 | 3.90  | 0.00 | 0.98 | 0.99 |
| mir-5p    | hsa-miR-148b-5p         | -0.01 | 2.86  | 0.00 | 0.98 | 0.99 |
| scRNA     | HY4                     | 0.01  | 10.16 | 0.00 | 0.98 | 0.99 |
| mir-5p    | hsa-let-7a-5p-L3        | -0.01 | 12.09 | 0.00 | 0.98 | 0.99 |
| piRNA     | piR-36376               | -0.01 | 2.64  | 0.00 | 0.98 | 0.99 |
| scRNA     | HY4-L120                | -0.01 | 9.92  | 0.00 | 0.98 | 0.99 |
| scRNA     | HY3-L177                | 0.00  | 1.55  | 0.00 | 0.98 | 0.99 |
| tRNA      | chr6.tRNA153-IleAAT     | -0.02 | 1.68  | 0.00 | 0.98 | 0.99 |
| mir-3p    | hsa-miR-92a-3p          | -0.01 | 11.39 | 0.00 | 0.98 | 0.99 |
| mir-3p    | hsa-miR-1307-3p         | 0.01  | 7.96  | 0.00 | 0.98 | 0.99 |
| scRNA     | HY4-L77                 | -0.01 | 2.15  | 0.00 | 0.98 | 0.99 |
| mir-5p    | hsa-miR-151a-5p         | 0.01  | 6.40  | 0.00 | 0.98 | 0.99 |
| scRNA     | HY3-L382                | -0.01 | 1.28  | 0.00 | 0.99 | 0.99 |
| snoRNA    | U56                     | -0.05 | 2.63  | 0.00 | 0.99 | 0.99 |
| piRNA     | piR-48772-L2            | 0.00  | 1.95  | 0.00 | 0.99 | 0.99 |
| mir-3p    | hsa-miR-181c-3p         | -0.02 | 1.57  | 0.00 | 0.99 | 0.99 |
| mir-5p    | hsa-miR-20b-5p          | 0.00  | 3.49  | 0.00 | 0.99 | 0.99 |
| mir-5p    | hsa-miR-361-5p          | 0.00  | 3.48  | 0.00 | 0.99 | 0.99 |
| scRNA     | HY4-L17                 | 0.00  | 10.67 | 0.00 | 0.99 | 0.99 |
| snRNA     | U2-L302                 | 0.00  | 4.05  | 0.00 | 0.99 | 1.00 |
| snRNA     | U2-L128                 | 0.00  | 7.39  | 0.00 | 1.00 | 1.00 |
| mir-3p    | hsa-miR-139-3p          | 0.00  | 3.31  | 0.00 | 1.00 | 1.00 |
| scRNA     | HY1-L45                 | 0.00  | 1.90  | 0.00 | 1.00 | 1.00 |
| tRNA      | chr5.tRNA14-ProTGG      | 0.00  | 4.85  | 0.00 | 1.00 | 1.00 |

**Supplementary Table 6: RNA correlations with baseline CRP titre**

| <i>RNA type</i> | <i>ID</i>             | <i>Average read count (log2 CPM)</i> | <i>Correlation coefficient</i> | <i>P-value</i> | <i>Adjusted P-value</i> |
|-----------------|-----------------------|--------------------------------------|--------------------------------|----------------|-------------------------|
| tRNA            | chr1.tRNA2-GlyCCC     | 5.38                                 | -0.03                          | 2.43E-06       | 3.61E-03                |
| rRNA            | LSU-rRNA_Hsa-L385     | 8.75                                 | 0.02                           | 3.77E-05       | 1.40E-02                |
| piRNA           | piR-31925-L8          | 7.36                                 | -0.03                          | 4.29E-05       | 1.40E-02                |
| piRNA           | piR-31925-L9          | 13.82                                | -0.02                          | 4.93E-05       | 1.40E-02                |
| tRNA            | chr1.tRNA99-ValCAC    | 8.58                                 | -0.03                          | 5.40E-05       | 1.40E-02                |
| tRNA            | chr1.tRNA88-PseudoCCT | 6.19                                 | -0.03                          | 6.78E-05       | 1.40E-02                |
| tRNA            | chr16.tRNA24-GlyGCC   | 15.82                                | -0.02                          | 7.05E-05       | 1.40E-02                |
| tRNA            | chr6.tRNA38-IleAAT    | 3.15                                 | 0.07                           | 7.52E-05       | 1.40E-02                |
| tRNA            | chr2.tRNA17-PseudoTTC | 7.07                                 | -0.03                          | 8.65E-05       | 1.43E-02                |
| piRNA           | piR-31925             | 11.30                                | -0.02                          | 1.07E-04       | 1.60E-02                |
| tRNA            | chr1.tRNA96-PseudoCCT | 8.20                                 | -0.03                          | 1.22E-04       | 1.65E-02                |
| tRNA            | chr17.tRNA13-GlyCCC   | 5.82                                 | -0.03                          | 1.33E-04       | 1.65E-02                |
| tRNA            | chr1.tRNA43-GlyGCC    | 6.87                                 | -0.03                          | 1.76E-04       | 2.02E-02                |
| piRNA           | piR-35284             | 8.07                                 | -0.03                          | 2.30E-04       | 2.44E-02                |
| scRNA           | HY1-L175              | 2.06                                 | 0.04                           | 2.78E-04       | 2.76E-02                |
| piRNA           | piR-31068-L10         | 2.13                                 | -0.07                          | 3.41E-04       | 3.05E-02                |
| piRNA           | piR-35982             | 15.63                                | -0.03                          | 3.49E-04       | 3.05E-02                |
| snRNA           | U14-L2                | 1.79                                 | -0.07                          | 8.76E-04       | 6.82E-02                |
| scRNA           | BC200-L76             | 2.55                                 | 0.03                           | 8.76E-04       | 6.82E-02                |
| tRNA            | chr19.tRNA8-SeCTCA    | 5.87                                 | 0.02                           | 9.17E-04       | 6.82E-02                |
| tRNA            | chr6.tRNA77-GluCTC    | 4.25                                 | 0.02                           | 1.13E-03       | 8.01E-02                |
| tRNA            | chr6.tRNA152-ValCAC   | 8.52                                 | -0.02                          | 1.37E-03       | 9.26E-02                |
| tRNA            | chr1.tRNA131-GlyCCC   | 7.00                                 | -0.03                          | 2.11E-03       | 0.13                    |
| tRNA            | chr6.tRNA82-GlyGCC    | 5.27                                 | -0.03                          | 2.19E-03       | 0.13                    |
| tRNA            | chr16.tRNA16-LeuAAG   | 3.29                                 | -0.03                          | 2.30E-03       | 0.13                    |
| piRNA           | piR-35982-L6          | 1.98                                 | -0.06                          | 2.33E-03       | 0.13                    |
| snRNA           | U1-L78                | 1.40                                 | -0.05                          | 2.93E-03       | 0.16                    |
| piRNA           | piR-61646-L2          | 8.65                                 | -0.02                          | 3.24E-03       | 0.17                    |
| snRNA           | U3-L18                | 6.00                                 | 0.03                           | 3.40E-03       | 0.17                    |
| scRNA           | BC200-L96             | 5.30                                 | 0.02                           | 3.42E-03       | 0.17                    |
| mir-3p          | hsa-miR-125b-2-3p     | 1.53                                 | -0.05                          | 3.91E-03       | 0.18                    |
| tRNA            | chr12.tRNA11-PheGAA   | 1.77                                 | 0.04                           | 3.92E-03       | 0.18                    |
| snRNA           | U1-L29                | 2.03                                 | 0.03                           | 4.13E-03       | 0.19                    |
| tRNA            | chr17.tRNA5-GlyGCC    | 7.52                                 | -0.02                          | 4.57E-03       | 0.20                    |
| tRNA            | chr12.tRNA4-AspGTC    | 4.64                                 | -0.03                          | 4.95E-03       | 0.21                    |
| scRNA           | BC200-L18             | 3.08                                 | 0.03                           | 5.17E-03       | 0.21                    |
| rRNA            | SSU-rRNA_Hsa-L73      | 14.22                                | 0.01                           | 6.11E-03       | 0.25                    |
| scRNA           | HY5-L7                | 2.29                                 | 0.02                           | 6.68E-03       | 0.26                    |
| rRNA            | 5S-L627               | 1.59                                 | -0.04                          | 7.04E-03       | 0.27                    |

|            |                          |       |       |          |      |
|------------|--------------------------|-------|-------|----------|------|
| tRNA       | chr17.tRNA18-ArgCCT      | 1.71  | 0.03  | 8.34E-03 | 0.31 |
| tRF3       | chr16.tRNA28-ProTGG-tRF3 | 1.99  | 0.03  | 9.07E-03 | 0.33 |
| snRNA      | U2-L240                  | 3.38  | 0.02  | 9.34E-03 | 0.33 |
| piRNA      | piR-31068-L3             | 3.12  | -0.03 | 9.75E-03 | 0.34 |
| tRNA       | chr1.tRNA39-GlyGCC       | 11.35 | -0.01 | 1.00E-02 | 0.34 |
| scRNA      | HY5-L21                  | 11.03 | 0.01  | 1.08E-02 | 0.36 |
| piRNA      | piR-60565-L4             | 12.26 | -0.01 | 1.11E-02 | 0.36 |
| rRNA       | SSU-rRNA_Hsa-L25         | 4.08  | -0.02 | 1.13E-02 | 0.36 |
| rRNA       | LSU-rRNA_Hsa-L275        | 5.54  | 0.02  | 1.15E-02 | 0.36 |
| scRNA      | HY5                      | 1.57  | 0.02  | 1.20E-02 | 0.36 |
| tRF3       | chr14.tRNA10-IleAAT-tRF3 | 2.47  | -0.04 | 1.21E-02 | 0.36 |
| tRNA       | chr11.tRNA12-ProTGG      | 8.16  | -0.02 | 1.25E-02 | 0.36 |
| tRNA       | chr15.tRNA4-ArgTCG       | 2.60  | 0.03  | 1.28E-02 | 0.36 |
| mir-5p3pnc | hsa-miR-215              | 3.83  | -0.03 | 1.29E-02 | 0.36 |
| scRNA      | HY1-L302                 | 2.49  | -0.02 | 1.35E-02 | 0.37 |
| mir-5p3pnc | hsa-miR-203a             | 2.28  | -0.05 | 1.40E-02 | 0.38 |
| snRNA      | U6-L9                    | 4.67  | 0.02  | 1.45E-02 | 0.38 |
| tRNA       | chr6.tRNA15-TyrGTA       | 5.52  | 0.02  | 1.49E-02 | 0.38 |
| tRNA       | chr6.tRNA30-ProCGG       | 10.88 | -0.01 | 1.49E-02 | 0.38 |
| snoRNA     | HBI-100                  | 4.44  | -0.02 | 1.50E-02 | 0.38 |
| scRNA      | HY4-L112                 | 3.97  | -0.02 | 1.54E-02 | 0.38 |
| tRNA       | chr6.tRNA123-SerGCT      | 2.23  | -0.03 | 1.60E-02 | 0.39 |
| tRNA       | chr6.tRNA36-ArgACG       | 1.39  | -0.04 | 1.67E-02 | 0.39 |
| mir-5p     | hsa-miR-330-5p           | 1.63  | 0.03  | 1.67E-02 | 0.39 |
| piRNA      | piR-60565-L12            | 10.99 | -0.02 | 1.71E-02 | 0.40 |
| rRNA       | SSU-rRNA_Hsa-L24         | 9.30  | 0.01  | 1.85E-02 | 0.41 |
| tRNA       | chr2.tRNA1-PseudoCCC     | 5.86  | -0.01 | 1.90E-02 | 0.41 |
| snRNA      | U2-L537                  | 2.76  | 0.02  | 1.92E-02 | 0.41 |
| mir-3p     | hsa-miR-708-3p           | 1.52  | 0.03  | 2.01E-02 | 0.41 |
| scRNA      | BC200-L24                | 2.86  | 0.02  | 2.04E-02 | 0.41 |
| scRNA      | HY4-L152                 | 7.32  | 0.01  | 2.05E-02 | 0.41 |
| mir-5p     | hsa-miR-23a-5p           | 1.78  | 0.02  | 2.06E-02 | 0.41 |
| tRNA       | chr7.tRNA7-CysGCA        | 7.06  | 0.02  | 2.10E-02 | 0.41 |
| piRNA      | piR-60576-L6             | 8.04  | -0.02 | 2.15E-02 | 0.41 |
| snRNA      | U2-L405                  | 3.55  | 0.02  | 2.19E-02 | 0.41 |
| mir-3p     | hsa-miR-4732-3p          | 2.44  | 0.03  | 2.21E-02 | 0.41 |
| tRNA       | chr6.tRNA11-IleAAT       | 8.31  | 0.02  | 2.21E-02 | 0.41 |
| snRNA      | U2-L75                   | 4.87  | 0.02  | 2.23E-02 | 0.41 |
| tRNA       | chr12.tRNA5-AspGTC       | 4.66  | 0.02  | 2.23E-02 | 0.41 |
| tRNA       | chr11.tRNA13-PheGAA      | 3.60  | 0.02  | 2.26E-02 | 0.41 |
| scRNA      | BC200-L122               | 3.31  | 0.02  | 2.26E-02 | 0.41 |
| piRNA      | piR-33382-L2             | 2.24  | -0.05 | 2.29E-02 | 0.41 |
| tRF5       | chr1.tRNA118-HisGTG-tRF5 | 1.83  | -0.04 | 2.30E-02 | 0.41 |

|            |                          |       |       |          |      |
|------------|--------------------------|-------|-------|----------|------|
| mir-3p     | hsa-miR-4446-3p          | 3.56  | -0.02 | 2.37E-02 | 0.41 |
| tRNA       | chr2.tRNA22-PseudoTTG    | 3.03  | -0.02 | 2.38E-02 | 0.41 |
| mir-3p     | hsa-miR-450a-3p          | 1.54  | -0.04 | 2.42E-02 | 0.41 |
| piRNA      | piR-31935                | 4.57  | 0.01  | 2.45E-02 | 0.41 |
| scRNA      | BC200-L13                | 2.84  | 0.03  | 2.45E-02 | 0.41 |
| tRNA       | chr1.tRNA64-GluTTC       | 7.89  | -0.01 | 2.51E-02 | 0.41 |
| tRNA       | chr5.tRNA6-ValCAC        | 10.69 | -0.01 | 2.52E-02 | 0.41 |
| tRNA       | chr6.tRNA138-ArgACG      | 1.66  | 0.03  | 2.52E-02 | 0.41 |
| mir-5p     | hsa-miR-744-5p           | 6.54  | -0.01 | 2.55E-02 | 0.41 |
| rRNA       | LSU-rRNA_Hsa-L211        | 1.63  | 0.02  | 2.57E-02 | 0.41 |
| tRNA       | chr13.tRNA3-GluTTC       | 10.17 | -0.01 | 2.59E-02 | 0.41 |
| mir-3p     | hsa-miR-30e-3p           | 8.45  | -0.01 | 2.60E-02 | 0.41 |
| mir-5p     | hsa-miR-452-5p           | 1.74  | -0.04 | 2.60E-02 | 0.41 |
| piRNA      | piR-50811                | 3.43  | 0.02  | 2.71E-02 | 0.41 |
| piRNA      | piR-35548-L2             | 7.18  | -0.02 | 2.71E-02 | 0.41 |
| piRNA      | piR-33382                | 8.69  | -0.02 | 2.72E-02 | 0.41 |
| tRNA       | chr6.tRNA40-ValTAC       | 2.73  | -0.02 | 2.74E-02 | 0.41 |
| mir-5p3pnc | hsa-miR-548j             | 1.80  | -0.03 | 2.74E-02 | 0.41 |
| scRNA      | HY5-L8                   | 3.89  | 0.02  | 2.77E-02 | 0.41 |
| tRNA       | chr17.tRNA2-LysTTT       | 3.04  | 0.02  | 2.84E-02 | 0.41 |
| tRNA       | chr14.tRNA16-TyrGTA      | 3.58  | 0.03  | 2.85E-02 | 0.41 |
| snRNA      | U2-L603                  | 6.16  | 0.02  | 2.86E-02 | 0.41 |
| tRNA       | chr2.tRNA11-PseudoTTG    | 6.71  | -0.02 | 2.88E-02 | 0.41 |
| mir-5p     | hsa-miR-769-5p           | 3.02  | -0.02 | 2.92E-02 | 0.41 |
| mir-5p3pnc | hsa-miR-1246             | 5.82  | 0.02  | 2.92E-02 | 0.41 |
| snoRNA     | U36A                     | 1.72  | -0.05 | 2.99E-02 | 0.41 |
| snoRNA     | U90                      | 2.75  | 0.02  | 3.04E-02 | 0.41 |
| scRNA      | HY4-L83                  | 4.19  | -0.02 | 3.11E-02 | 0.42 |
| scRNA      | HY4-L89                  | 8.76  | -0.01 | 3.15E-02 | 0.42 |
| mir-3p     | hsa-miR-28-3p            | 7.13  | -0.01 | 3.21E-02 | 0.43 |
| scRNA      | HY5-L11                  | 5.18  | 0.01  | 3.32E-02 | 0.44 |
| tRNA       | chr11.tRNA11-LysTTT      | 7.37  | 0.02  | 3.37E-02 | 0.44 |
| snRNA      | U2-L615                  | 13.00 | 0.02  | 3.40E-02 | 0.44 |
| mir-3p     | hsa-miR-148b-3p          | 8.62  | -0.01 | 3.46E-02 | 0.44 |
| mir-5p3pnc | hsa-miR-1290             | 2.06  | 0.03  | 3.47E-02 | 0.44 |
| snRNA      | U2-L981                  | 4.06  | 0.02  | 3.52E-02 | 0.44 |
| rRNA       | LSU-rRNA_Hsa-L2          | 9.24  | 0.02  | 3.54E-02 | 0.44 |
| snRNA      | U2-L1074                 | 3.33  | 0.02  | 3.72E-02 | 0.46 |
| tRF5       | chr1.tRNA130-ValCAC-tRF5 | 2.38  | 0.02  | 3.73E-02 | 0.46 |
| scRNA      | HY4-L37                  | 4.01  | -0.02 | 3.77E-02 | 0.46 |
| tRNA       | chr6.tRNA87-GluCTC       | 15.82 | -0.01 | 3.79E-02 | 0.46 |
| mir-3p     | hsa-miR-499b-3p          | 3.26  | 0.02  | 3.84E-02 | 0.46 |
| mir-5p     | hsa-let-7i-5p            | 12.19 | -0.01 | 3.89E-02 | 0.46 |

|            |                        |       |       |          |      |
|------------|------------------------|-------|-------|----------|------|
| tRNA       | chr2.tRNA6-GluTTC      | 4.09  | -0.01 | 3.91E-02 | 0.46 |
| piRNA      | piR-35982-L11          | 1.95  | -0.04 | 3.91E-02 | 0.46 |
| scRNA      | HY1-L167               | 2.48  | -0.03 | 3.94E-02 | 0.46 |
| snoRNA     | U58C                   | 3.37  | -0.03 | 3.96E-02 | 0.46 |
| piRNA      | piR-43995-L4           | 6.52  | -0.01 | 4.00E-02 | 0.46 |
| snoRNA     | ACA45                  | 6.69  | -0.01 | 4.06E-02 | 0.46 |
| rRNA       | LSU-rRNA_Hsa-L31       | 7.70  | -0.02 | 4.07E-02 | 0.46 |
| tRNA       | chr6.tRNA147-SerAGA    | 8.22  | -0.02 | 4.09E-02 | 0.46 |
| mir-3p     | hsa-miR-146b-3p        | 2.42  | -0.02 | 4.22E-02 | 0.46 |
| mir-3p     | hsa-miR-374b-3p        | 2.49  | -0.03 | 4.27E-02 | 0.46 |
| mir-5p3pnc | hsa-miR-760            | 2.39  | -0.02 | 4.29E-02 | 0.46 |
| tRF5       | chr9.tRNA6-AspGTC-tRF5 | 2.90  | 0.02  | 4.30E-02 | 0.46 |
| rRNA       | LSU-rRNA_Hsa-L366      | 4.93  | -0.02 | 4.34E-02 | 0.46 |
| tRNA       | chr1.tRNA4-GlyCCC      | 5.56  | -0.01 | 4.35E-02 | 0.46 |
| snRNA      | U2-L166                | 3.45  | -0.04 | 4.48E-02 | 0.48 |
| snoRNA     | U29                    | 5.29  | 0.02  | 4.54E-02 | 0.48 |
| scRNA      | HY4-L134               | 2.51  | -0.02 | 4.58E-02 | 0.48 |
| mir-3p     | hsa-miR-143-3p         | 9.70  | -0.01 | 4.62E-02 | 0.48 |
| mir-3p     | hsa-miR-200a-3p        | 2.22  | -0.03 | 4.71E-02 | 0.49 |
| snRNA      | U2-L288                | 2.57  | -0.02 | 4.80E-02 | 0.49 |
| snRNA      | U2-L250                | 12.48 | 0.02  | 4.82E-02 | 0.49 |
| tRNA       | chr17.tRNA36-ThrAGT    | 2.02  | 0.02  | 4.86E-02 | 0.49 |
| scRNA      | BC200-L110             | 1.47  | 0.03  | 4.95E-02 | 0.49 |
| mir-3p     | hsa-miR-221-3p         | 7.16  | -0.01 | 4.98E-02 | 0.49 |
| snRNA      | U2-L887                | 6.33  | 0.01  | 5.03E-02 | 0.49 |
| mir-5p     | hsa-miR-3158-5p-L2     | 1.49  | 0.04  | 5.06E-02 | 0.49 |
| tRNA       | chr2.tRNA13-AlaCGC     | 6.52  | -0.01 | 5.06E-02 | 0.49 |
| snoRNA     | mgU2-19/30             | 3.71  | 0.01  | 5.06E-02 | 0.49 |
| scRNA      | HY4-L58                | 3.81  | -0.01 | 5.10E-02 | 0.49 |
| mir-5p3pnc | hsa-miR-103b-L2        | 3.90  | -0.02 | 5.28E-02 | 0.51 |
| tRNA       | chr2.tRNA25-PseudoCTC  | 8.69  | -0.01 | 5.30E-02 | 0.51 |
| snoRNA     | U43                    | 4.95  | 0.02  | 5.40E-02 | 0.51 |
| scRNA      | HY3-L525               | 1.38  | -0.03 | 5.40E-02 | 0.51 |
| rRNA       | LSU-rRNA_Hsa-L384      | 14.09 | 0.01  | 5.56E-02 | 0.52 |
| scRNA      | BC200-L151             | 2.08  | 0.02  | 5.57E-02 | 0.52 |
| scRNA      | BC200-L117             | 1.83  | 0.03  | 5.69E-02 | 0.52 |
| snRNA      | U2-L532                | 3.08  | 0.02  | 5.70E-02 | 0.52 |
| mir-3p     | hsa-miR-101-3p         | 10.61 | -0.01 | 5.75E-02 | 0.52 |
| scRNA      | HY3-L287               | 1.40  | -0.02 | 5.77E-02 | 0.52 |
| rRNA       | LSU-rRNA_Hsa-L64       | 1.52  | -0.03 | 5.78E-02 | 0.52 |
| mir-5p3pnc | hsa-miR-3609           | 2.87  | -0.03 | 5.88E-02 | 0.53 |
| piRNA      | piR-61465              | 3.75  | 0.02  | 5.93E-02 | 0.53 |
| rRNA       | LSU-rRNA_Hsa-L67       | 3.16  | -0.03 | 6.03E-02 | 0.53 |

|            |                             |       |       |          |      |
|------------|-----------------------------|-------|-------|----------|------|
| mir-3p     | hsa-miR-151a-3p             | 11.62 | -0.01 | 6.03E-02 | 0.53 |
| piRNA      | piR-43325-L7                | 3.82  | 0.02  | 6.22E-02 | 0.54 |
| snRNA      | U7-L207                     | 2.19  | -0.03 | 6.40E-02 | 0.55 |
| tRF5       | chr17.tRNA33-PseudoTTG-tRF5 | 5.92  | -0.02 | 6.40E-02 | 0.55 |
| mir-5p     | hsa-miR-379-5p              | 5.35  | -0.02 | 6.42E-02 | 0.55 |
| snRNA      | U2-L481                     | 1.44  | -0.04 | 6.47E-02 | 0.55 |
| scRNA      | BC200-L147                  | 2.25  | 0.02  | 6.53E-02 | 0.56 |
| rRNA       | SSU-rRNA_Hsa-L33            | 12.79 | 0.01  | 6.69E-02 | 0.56 |
| mir-3p     | hsa-miR-361-3p              | 7.04  | -0.01 | 6.70E-02 | 0.56 |
| tRNA       | chr17.tRNA41-SerCGA         | 2.38  | -0.04 | 6.88E-02 | 0.57 |
| scRNA      | HY5-L19                     | 2.11  | 0.02  | 6.92E-02 | 0.57 |
| mir-5p     | hsa-miR-15b-5p              | 2.72  | -0.02 | 6.93E-02 | 0.57 |
| piRNA      | piR-43772-L2                | 6.19  | -0.01 | 7.04E-02 | 0.58 |
| mir-5p     | hsa-miR-224-5p              | 6.88  | -0.01 | 7.17E-02 | 0.58 |
| tRNA       | chr13.tRNA5-GluTTC          | 8.98  | -0.01 | 7.19E-02 | 0.58 |
| scRNA      | BC200-L90                   | 2.60  | 0.02  | 7.32E-02 | 0.59 |
| rRNA       | LSU-rRNA_Hsa-L409           | 4.71  | 0.01  | 7.33E-02 | 0.59 |
| tRNA       | chr1.tRNA137-Pseudo???      | 6.02  | -0.02 | 7.34E-02 | 0.59 |
| rRNA       | LSU-rRNA_Hsa-L350           | 10.47 | 0.01  | 7.45E-02 | 0.59 |
| scRNA      | HY3-L159                    | 3.19  | 0.02  | 7.49E-02 | 0.59 |
| snRNA      | U2-L342                     | 5.41  | 0.02  | 7.50E-02 | 0.59 |
| mir-5p     | hsa-miR-340-5p              | 6.42  | -0.01 | 7.51E-02 | 0.59 |
| mir-3p     | hsa-miR-127-3p              | 5.07  | -0.02 | 7.68E-02 | 0.60 |
| mir-5p3pnc | hsa-miR-941                 | 6.39  | -0.01 | 7.88E-02 | 0.61 |
| tRNA       | chr6.tRNA4-ArgTCG           | 2.79  | 0.02  | 7.90E-02 | 0.61 |
| mir-5p3pnc | hsa-miR-320e                | 1.85  | -0.02 | 7.93E-02 | 0.61 |
| rRNA       | LSU-rRNA_Hsa-L387           | 9.35  | 0.01  | 7.99E-02 | 0.61 |
| mir-3p     | hsa-miR-3158-3p             | 3.71  | -0.02 | 8.10E-02 | 0.61 |
| rRNA       | LSU-rRNA_Hsa-L185           | 2.41  | -0.02 | 8.12E-02 | 0.61 |
| snoRNA     | U30                         | 6.13  | 0.02  | 8.25E-02 | 0.62 |
| scRNA      | BC200-L129                  | 2.19  | 0.02  | 8.30E-02 | 0.62 |
| tRNA       | chr1.tRNA16-HisGTG          | 11.64 | -0.01 | 8.46E-02 | 0.63 |
| tRNA       | chr14.tRNA4-ThrTGT          | 1.44  | 0.02  | 8.49E-02 | 0.63 |
| mir-5p3pnc | hsa-miR-326                 | 1.98  | -0.02 | 8.51E-02 | 0.63 |
| piRNA      | piR-35468                   | 4.14  | 0.02  | 8.61E-02 | 0.63 |
| tRF3       | chr17.tRNA13-GlyCCC-tRF3    | 5.22  | 0.01  | 8.79E-02 | 0.63 |
| scRNA      | BC200-L148                  | 2.11  | 0.02  | 8.82E-02 | 0.63 |
| mir-3p     | hsa-miR-200b-3p             | 1.87  | -0.02 | 8.83E-02 | 0.63 |
| tRNA       | chr16.tRNA29-ProAGG         | 2.96  | -0.02 | 8.87E-02 | 0.63 |
| tRF3       | chr17.tRNA1-Pseudo???-tRF3  | 2.09  | -0.02 | 8.99E-02 | 0.63 |
| snRNA      | U5-L66                      | 6.99  | 0.01  | 9.02E-02 | 0.63 |
| rRNA       | 5S-L233                     | 2.20  | 0.02  | 9.03E-02 | 0.63 |
| mir-3p     | hsa-miR-140-3p              | 9.02  | -0.01 | 9.05E-02 | 0.63 |



|            |                            |       |       |          |      |
|------------|----------------------------|-------|-------|----------|------|
| tRNA       | chr6.tRNA28-IleAAT         | 3.35  | 0.02  | 9.07E-02 | 0.63 |
| mir-3p     | hsa-miR-493-3p             | 3.21  | -0.02 | 9.11E-02 | 0.63 |
| snRNA      | U2-L386                    | 2.89  | 0.02  | 9.17E-02 | 0.63 |
| snoRNA     | ACA61                      | 2.02  | 0.02  | 9.19E-02 | 0.63 |
| snoRNA     | U15B                       | 2.19  | -0.03 | 9.24E-02 | 0.63 |
| snoRNA     | U58B                       | 4.91  | 0.02  | 9.24E-02 | 0.63 |
| piRNA      | piR-47305                  | 9.66  | -0.01 | 9.26E-02 | 0.63 |
| tRNA       | chrX.tRNA4-ValTAC          | 5.20  | -0.01 | 9.29E-02 | 0.63 |
| tRNA       | chr5.tRNA15-ValAAC         | 4.70  | -0.01 | 9.30E-02 | 0.63 |
| mir-5p3pnc | hsa-miR-3909               | 1.71  | -0.03 | 9.36E-02 | 0.63 |
| rRNA       | LSU-rRNA_Hsa-L84           | 2.85  | -0.02 | 0.10     | 0.64 |
| mir-5p     | hsa-miR-3605-5p            | 2.60  | 0.02  | 0.10     | 0.64 |
| mir-5p     | hsa-miR-199b-5p            | 2.97  | -0.02 | 0.10     | 0.64 |
| rRNA       | SSU-rRNA_Hsa-L46           | 6.10  | -0.02 | 0.10     | 0.64 |
| mir-3p     | hsa-miR-25-3p              | 12.18 | -0.01 | 0.10     | 0.64 |
| scRNA      | HY3-L478                   | 8.12  | -0.01 | 0.10     | 0.64 |
| scRNA      | BC200-L23                  | 3.06  | 0.02  | 0.10     | 0.64 |
| snRNA      | U1-L45                     | 6.78  | -0.01 | 0.10     | 0.64 |
| snRNA      | U5-L3                      | 2.02  | -0.02 | 0.10     | 0.65 |
| rRNA       | LSU-rRNA_Hsa-L19           | 2.10  | 0.02  | 0.10     | 0.65 |
| mir-3p     | hsa-miR-502-3p             | 2.26  | -0.02 | 0.10     | 0.65 |
| snoRNA     | HBII-99                    | 4.91  | 0.02  | 0.10     | 0.65 |
| scRNA      | BC200-L60                  | 2.38  | 0.02  | 0.10     | 0.65 |
| scRNA      | HY4-L127                   | 11.00 | -0.01 | 0.10     | 0.65 |
| scRNA      | BC200-L140                 | 7.01  | 0.01  | 0.10     | 0.65 |
| scRNA      | HY1-L442                   | 1.33  | -0.03 | 0.10     | 0.65 |
| tRF3       | chr3.tRNA10-PseudoCTC-tRF3 | 1.55  | -0.03 | 0.11     | 0.66 |
| snoRNA     | U95                        | 6.95  | -0.01 | 0.11     | 0.66 |
| snoRNA     | U46                        | 4.48  | 0.02  | 0.11     | 0.66 |
| mir-5p     | hsa-miR-584-5p             | 7.31  | -0.01 | 0.11     | 0.66 |
| mir-5p     | hsa-miR-589-5p             | 4.55  | 0.01  | 0.11     | 0.66 |
| scRNA      | BC200-L139                 | 3.27  | 0.01  | 0.11     | 0.66 |
| scRNA      | BC200-L31                  | 1.42  | 0.02  | 0.11     | 0.66 |
| tRNA       | chr1.tRNA128-LysCTT        | 3.24  | 0.02  | 0.11     | 0.66 |
| snRNA      | U1-L39                     | 1.74  | -0.02 | 0.11     | 0.66 |
| rRNA       | LSU-rRNA_Hsa-L4            | 8.09  | -0.01 | 0.11     | 0.66 |
| snRNA      | U3-L205                    | 4.79  | -0.01 | 0.11     | 0.66 |
| scRNA      | BC200-L108                 | 2.02  | 0.02  | 0.11     | 0.66 |
| snRNA      | U2-L128                    | 7.39  | 0.01  | 0.11     | 0.66 |
| mir-3p     | hsa-miR-29c-3p             | 1.99  | 0.02  | 0.11     | 0.66 |
| snoRNA     | HBII-251                   | 3.81  | -0.03 | 0.11     | 0.66 |
| snRNA      | U2-L825                    | 3.19  | 0.02  | 0.11     | 0.67 |
| tRNA       | chr17.tRNA20-MetCAT        | 1.87  | 0.03  | 0.12     | 0.67 |

|            |                         |       |       |      |      |
|------------|-------------------------|-------|-------|------|------|
| mir-5p3pnc | hsa-miR-548e            | 2.60  | -0.02 | 0.12 | 0.67 |
| piRNA      | piR-36444               | 2.53  | -0.02 | 0.12 | 0.67 |
| snoRNA     | U91                     | 2.24  | -0.04 | 0.12 | 0.67 |
| tRNA       | chr12.tRNA2-SerCGA      | 1.52  | 0.04  | 0.12 | 0.67 |
| snRNA      | U2-L1061                | 11.07 | 0.01  | 0.12 | 0.67 |
| tRNA       | chr13.tRNA2-PseudoCTC   | 4.77  | -0.01 | 0.12 | 0.67 |
| snRNA      | U2-L765                 | 2.07  | 0.02  | 0.12 | 0.67 |
| snRNA      | U1-L142                 | 4.24  | -0.02 | 0.12 | 0.67 |
| mir-5p     | hsa-miR-30a-5p          | 7.14  | -0.01 | 0.12 | 0.67 |
| rRNA       | LSU-rRNA_Hsa-L202       | 3.79  | 0.01  | 0.12 | 0.67 |
| piRNA      | piR-57516               | 5.25  | 0.01  | 0.12 | 0.67 |
| mir-5p     | hsa-miR-146b-5p         | 7.71  | -0.01 | 0.12 | 0.67 |
| tRNA       | chr14.tRNA23-ProAGG     | 2.14  | -0.02 | 0.12 | 0.67 |
| rRNA       | LSU-rRNA_Hsa-L331       | 1.53  | -0.02 | 0.12 | 0.67 |
| rRNA       | LSU-rRNA_Hsa-L388       | 10.79 | 0.01  | 0.12 | 0.67 |
| snoRNA     | U50                     | 5.82  | -0.02 | 0.12 | 0.67 |
| rRNA       | LSU-rRNA_Hsa-L41        | 1.50  | -0.03 | 0.12 | 0.67 |
| scRNA      | HY1-L273                | 1.90  | 0.02  | 0.12 | 0.67 |
| rRNA       | LSU-rRNA_Hsa-L278       | 2.72  | 0.01  | 0.12 | 0.67 |
| tRNA       | chr17.tRNA23-ArgCCG     | 3.40  | 0.01  | 0.12 | 0.67 |
| tRNA       | chr11.tRNA8-SerGCT      | 4.09  | -0.01 | 0.12 | 0.67 |
| snRNA      | U1-L4                   | 8.27  | 0.01  | 0.13 | 0.68 |
| mir-3p     | hsa-miR-629-3p          | 1.42  | 0.02  | 0.13 | 0.68 |
| tRF3       | chr3.tRNA6-CysGCA-tRF3  | 2.19  | 0.02  | 0.13 | 0.68 |
| rRNA       | LSU-rRNA_Hsa-L295       | 3.46  | 0.01  | 0.13 | 0.68 |
| mir-3p     | hsa-miR-223-3p          | 7.30  | -0.01 | 0.13 | 0.68 |
| mir-5p     | hsa-miR-155-5p          | 4.35  | -0.01 | 0.13 | 0.68 |
| tRF3       | chrX.tRNA2-LeuTAA-tRF3  | 1.82  | -0.02 | 0.13 | 0.68 |
| scRNA      | HY4-L81                 | 3.17  | -0.01 | 0.13 | 0.68 |
| snoRNA     | U76                     | 2.36  | 0.03  | 0.13 | 0.68 |
| tRNA       | chr1.tRNA134-GluTTC     | 7.45  | -0.01 | 0.13 | 0.68 |
| snoRNA     | U66                     | 1.79  | -0.02 | 0.13 | 0.69 |
| rRNA       | 5S-L612                 | 2.86  | 0.02  | 0.13 | 0.69 |
| tRF3       | chr18.tRNA1-GluCTC-tRF3 | 2.27  | 0.02  | 0.14 | 0.70 |
| scRNA      | BC200-L12               | 1.72  | 0.02  | 0.14 | 0.70 |
| snoRNA     | U3-3                    | 2.21  | -0.03 | 0.14 | 0.70 |
| scRNA      | BC200-L19               | 1.37  | -0.03 | 0.14 | 0.70 |
| scRNA      | BC200-L165              | 1.54  | 0.02  | 0.14 | 0.70 |
| rRNA       | LSU-rRNA_Hsa-L93        | 7.67  | 0.01  | 0.14 | 0.70 |
| tRNA       | chr6.tRNA88-PseudoGAA   | 8.20  | 0.01  | 0.14 | 0.70 |
| tRNA       | chr1.tRNA33-Pseudo???   | 3.32  | -0.01 | 0.14 | 0.70 |
| tRNA       | chr5.tRNA8-AlaTGC       | 3.15  | -0.02 | 0.14 | 0.70 |
| scRNA      | HY1-L418                | 1.64  | -0.02 | 0.14 | 0.70 |

|            |                          |       |       |      |      |
|------------|--------------------------|-------|-------|------|------|
| scRNA      | HY3-L35                  | 2.20  | -0.02 | 0.14 | 0.70 |
| snoRNA     | U93                      | 1.72  | 0.02  | 0.14 | 0.70 |
| tRF5       | chr6.tRNA78-LeuAAG-tRF5  | 1.31  | 0.03  | 0.14 | 0.70 |
| rRNA       | 5S-L303                  | 2.33  | -0.02 | 0.14 | 0.70 |
| mir-3p     | hsa-miR-27b-3p           | 8.94  | -0.01 | 0.14 | 0.70 |
| rRNA       | 5S-L1179                 | 1.46  | 0.02  | 0.14 | 0.70 |
| piRNA      | piR-36499                | 1.68  | 0.02  | 0.14 | 0.70 |
| rRNA       | LSU-rRNA_Hsa-L323        | 8.20  | -0.01 | 0.14 | 0.70 |
| snoRNA     | U37                      | 1.76  | -0.04 | 0.14 | 0.70 |
| rRNA       | LSU-rRNA_Hsa-L252        | 2.99  | 0.01  | 0.15 | 0.70 |
| tRNA       | chr6.tRNA172-SerTGA      | 1.90  | 0.02  | 0.15 | 0.70 |
| mir-3p     | hsa-miR-381-3p           | 4.43  | -0.02 | 0.15 | 0.70 |
| tRNA       | chr2.tRNA3-AlaAGC        | 3.59  | -0.02 | 0.15 | 0.70 |
| rRNA       | LSU-rRNA_Hsa-L132        | 10.51 | 0.01  | 0.15 | 0.71 |
| scRNA      | HY3-L279                 | 5.21  | 0.01  | 0.15 | 0.71 |
| rRNA       | 5S-L95                   | 1.71  | 0.02  | 0.15 | 0.71 |
| piRNA      | piR-58356                | 5.40  | -0.01 | 0.15 | 0.71 |
| tRNA       | chr1.tRNA116-GluCTC      | 3.79  | 0.01  | 0.15 | 0.71 |
| mir-3p     | hsa-miR-103a-3p-L2       | 3.33  | -0.01 | 0.15 | 0.71 |
| scRNA      | HY3-L84                  | 6.39  | -0.01 | 0.15 | 0.71 |
| snRNA      | U2-L205                  | 1.72  | -0.03 | 0.15 | 0.71 |
| piRNA      | piR-60577-L3             | 7.08  | -0.01 | 0.15 | 0.71 |
| tRF5       | chr6.tRNA109-PheGAA-tRF5 | 2.26  | 0.02  | 0.15 | 0.71 |
| snRNA      | U7-L212                  | 2.30  | -0.03 | 0.15 | 0.71 |
| mir-5p     | hsa-miR-98-5p            | 6.17  | -0.01 | 0.15 | 0.71 |
| mir-3p     | hsa-miR-582-3p           | 4.81  | -0.01 | 0.15 | 0.71 |
| tRNA       | chrX.tRNA2-LeuTAA        | 1.38  | -0.02 | 0.16 | 0.71 |
| rRNA       | 5S-L1114                 | 1.68  | 0.01  | 0.16 | 0.71 |
| tRF5       | chr5.tRNA22-AspGTC-tRF5  | 2.30  | 0.02  | 0.16 | 0.71 |
| mir-5p     | hsa-miR-3614-5p          | 1.91  | -0.02 | 0.16 | 0.71 |
| mir-5p     | hsa-miR-126-5p           | 6.05  | -0.01 | 0.16 | 0.71 |
| snoRNA     | ACA58                    | 1.85  | -0.02 | 0.16 | 0.72 |
| tRNA       | chr1.tRNA15-GlnCTG       | 2.98  | -0.01 | 0.16 | 0.72 |
| snRNA      | U4-L41                   | 2.29  | 0.01  | 0.16 | 0.72 |
| piRNA      | piR-35952-L4             | 3.22  | -0.02 | 0.16 | 0.72 |
| piRNA      | piR-32950                | 6.31  | 0.01  | 0.16 | 0.72 |
| scRNA      | HY4-L44                  | 1.59  | 0.01  | 0.16 | 0.72 |
| piRNA      | piR-31987                | 6.33  | -0.01 | 0.16 | 0.72 |
| piRNA      | piR-33065                | 4.52  | -0.01 | 0.16 | 0.72 |
| scRNA      | HY1-L28                  | 1.58  | -0.02 | 0.16 | 0.72 |
| mir-5p3pnc | hsa-miR-152              | 5.59  | -0.01 | 0.16 | 0.72 |
| tRNA       | chr6.tRNA37-ValAAC       | 9.05  | -0.01 | 0.16 | 0.72 |
| mir-5p     | hsa-miR-574-5p           | 4.85  | 0.01  | 0.16 | 0.72 |

|            |                            |       |       |      |      |
|------------|----------------------------|-------|-------|------|------|
| scRNA      | BC200-L4                   | 3.40  | 0.01  | 0.16 | 0.72 |
| rRNA       | 5S-L136                    | 1.53  | -0.02 | 0.17 | 0.72 |
| mir-3p     | hsa-miR-17-3p              | 1.53  | -0.02 | 0.17 | 0.72 |
| rRNA       | 5S-L573                    | 3.03  | 0.01  | 0.17 | 0.72 |
| piRNA      | piR-51119                  | 2.10  | -0.03 | 0.17 | 0.72 |
| piRNA      | piR-36041                  | 7.32  | -0.01 | 0.17 | 0.72 |
| scRNA      | HY3-L45                    | 3.48  | -0.02 | 0.17 | 0.72 |
| tRNA       | chr1.tRNA72-AspGTC         | 7.23  | 0.01  | 0.17 | 0.72 |
| rRNA       | LSU-rRNA_Hsa-L139          | 14.15 | -0.01 | 0.17 | 0.72 |
| snRNA      | U1-L8                      | 6.14  | 0.01  | 0.17 | 0.72 |
| rRNA       | LSU-rRNA_Hsa-L15           | 6.48  | 0.01  | 0.17 | 0.72 |
| rRNA       | LSU-rRNA_Hsa-L102          | 3.17  | 0.01  | 0.17 | 0.72 |
| tRF3       | chr16.tRNA31-PseudoTGG-tRF | 1.95  | 0.02  | 0.17 | 0.72 |
| scRNA      | BC200-L155                 | 2.70  | 0.02  | 0.17 | 0.72 |
| scRNA      | BC200-L116                 | 2.42  | 0.02  | 0.17 | 0.72 |
| mir-5p     | hsa-miR-339-5p             | 1.85  | -0.03 | 0.17 | 0.72 |
| tRNA       | chr16.tRNA7-LysCTT         | 2.24  | 0.02  | 0.18 | 0.72 |
| snRNA      | U1-L11                     | 3.90  | -0.02 | 0.18 | 0.72 |
| rRNA       | SSU-rRNA_Hsa-L50           | 4.47  | 0.01  | 0.18 | 0.72 |
| mir-5p     | hsa-let-7g-5p              | 11.06 | -0.01 | 0.18 | 0.72 |
| mir-5p     | hsa-miR-493-5p             | 4.61  | -0.02 | 0.18 | 0.72 |
| mir-3p     | hsa-miR-132-3p             | 1.92  | -0.02 | 0.18 | 0.72 |
| tRNA       | chr19.tRNA13-ValCAC        | 4.33  | -0.01 | 0.18 | 0.72 |
| snRNA      | U2-L782                    | 2.99  | 0.01  | 0.18 | 0.72 |
| mir-3p     | hsa-miR-369-3p             | 1.38  | 0.02  | 0.18 | 0.72 |
| tRNA       | chr1.tRNA102-PseudoTTC     | 6.55  | -0.01 | 0.18 | 0.72 |
| piRNA      | piR-41209                  | 2.58  | 0.01  | 0.18 | 0.72 |
| mir-3p     | hsa-miR-5480-3p-L2         | 3.14  | -0.01 | 0.18 | 0.72 |
| tRNA       | chr6.tRNA148-SerTGA        | 3.56  | 0.02  | 0.18 | 0.72 |
| tRNA       | chr1.tRNA106-HisGTG        | 3.36  | -0.01 | 0.18 | 0.72 |
| mir-5p     | hsa-miR-6723-5p            | 4.58  | -0.01 | 0.18 | 0.72 |
| mir-5p3pnc | hsa-miR-1244-L2            | 1.66  | 0.02  | 0.18 | 0.72 |
| mir-3p     | hsa-miR-323a-3p            | 3.26  | -0.02 | 0.18 | 0.72 |
| mir-3p     | hsa-miR-24-3p              | 8.44  | -0.01 | 0.18 | 0.72 |
| rRNA       | LSU-rRNA_Hsa-L383          | 14.16 | 0.01  | 0.18 | 0.72 |
| scRNA      | BC200-L85                  | 1.96  | 0.01  | 0.18 | 0.72 |
| snoRNA     | U24                        | 2.09  | 0.02  | 0.18 | 0.72 |
| scRNA      | BC200-L10                  | 2.65  | 0.01  | 0.18 | 0.72 |
| piRNA      | piR-35413-L2               | 1.56  | -0.02 | 0.19 | 0.72 |
| mir-5p     | hsa-miR-21-5p              | 13.59 | -0.01 | 0.19 | 0.72 |
| piRNA      | piR-31038                  | 9.22  | -0.01 | 0.19 | 0.73 |
| scRNA      | HY3-L177                   | 1.55  | -0.02 | 0.19 | 0.73 |
| mir-5p3pnc | hsa-miR-128                | 8.32  | -0.01 | 0.19 | 0.73 |

|            |                         |       |       |      |      |
|------------|-------------------------|-------|-------|------|------|
| scRNA      | HY4-L70                 | 9.07  | -0.01 | 0.19 | 0.74 |
| rRNA       | 5S-L1091                | 1.37  | -0.02 | 0.19 | 0.74 |
| mir-3p     | hsa-miR-21-3p           | 1.95  | 0.02  | 0.19 | 0.74 |
| rRNA       | 5S-L1234                | 5.10  | 0.01  | 0.19 | 0.74 |
| scRNA      | HY4-L96                 | 3.68  | -0.01 | 0.19 | 0.74 |
| rRNA       | LSU-rRNA_Hsa-L214       | 2.13  | 0.03  | 0.19 | 0.74 |
| piRNA      | piR-32678               | 6.09  | 0.01  | 0.19 | 0.74 |
| mir-5p     | hsa-miR-146a-5p         | 9.39  | -0.01 | 0.19 | 0.74 |
| mir-3p     | hsa-miR-4742-3p         | 1.43  | 0.02  | 0.20 | 0.74 |
| mir-5p     | hsa-miR-9-5p-L3         | 3.09  | -0.01 | 0.20 | 0.74 |
| piRNA      | piR-49143               | 11.96 | -0.01 | 0.20 | 0.74 |
| rRNA       | 5S-L105                 | 5.89  | 0.01  | 0.20 | 0.74 |
| rRNA       | 5S-L955                 | 1.52  | -0.02 | 0.20 | 0.74 |
| piRNA      | piR-36412               | 2.36  | -0.02 | 0.20 | 0.74 |
| snoRNA     | U20                     | 6.66  | -0.01 | 0.20 | 0.74 |
| rRNA       | LSU-rRNA_Hsa-L43        | 1.53  | 0.01  | 0.20 | 0.74 |
| scRNA      | HY3-L272                | 1.38  | 0.02  | 0.20 | 0.74 |
| snRNA      | U2-L709                 | 3.25  | -0.01 | 0.20 | 0.74 |
| snoRNA     | HBII-429                | 4.20  | -0.02 | 0.20 | 0.74 |
| mir-3p     | hsa-let-7f-1-3p         | 1.62  | -0.02 | 0.20 | 0.74 |
| rRNA       | LSU-rRNA_Hsa-L165       | 7.53  | -0.01 | 0.20 | 0.74 |
| snoRNA     | U51                     | 2.71  | -0.02 | 0.20 | 0.74 |
| mir-5p3pnc | hsa-miR-1299            | 2.07  | -0.03 | 0.20 | 0.74 |
| rRNA       | SSU-rRNA_Hsa-L72        | 14.26 | 0.01  | 0.20 | 0.74 |
| rRNA       | LSU-rRNA_Hsa-L305       | 5.25  | -0.01 | 0.20 | 0.74 |
| piRNA      | piR-36743               | 3.67  | -0.01 | 0.20 | 0.74 |
| tRF5       | chr20.tRNA6-LeuAAG-tRF5 | 3.01  | -0.01 | 0.20 | 0.74 |
| snoRNA     | HBII-85-15              | 1.65  | -0.03 | 0.21 | 0.75 |
| snoRNA     | ACA47                   | 3.23  | -0.01 | 0.21 | 0.75 |
| mir-5p     | hsa-miR-214-5p          | 1.57  | -0.02 | 0.21 | 0.75 |
| scRNA      | HY4-L139                | 10.83 | -0.01 | 0.21 | 0.75 |
| snoRNA     | U44                     | 6.36  | 0.01  | 0.21 | 0.75 |
| mir-3p     | hsa-miR-181a-2-3p       | 4.18  | -0.01 | 0.21 | 0.75 |
| tRNA       | chr17.tRNA10-GlyTCC     | 1.81  | -0.02 | 0.21 | 0.76 |
| snRNA      | U14-L3                  | 1.49  | -0.03 | 0.21 | 0.76 |
| mir-5p     | hsa-miR-483-5p          | 4.02  | 0.01  | 0.21 | 0.76 |
| mir-5p     | hsa-miR-532-5p          | 7.72  | -0.01 | 0.21 | 0.76 |
| tRNA       | chr9.tRNA4-ArgTCT       | 1.63  | -0.02 | 0.21 | 0.76 |
| rRNA       | 5S-L100                 | 2.88  | 0.01  | 0.22 | 0.76 |
| scRNA      | HY4-L49                 | 1.27  | -0.02 | 0.22 | 0.76 |
| rRNA       | 5S-L990                 | 3.08  | -0.01 | 0.22 | 0.76 |
| snRNA      | U13_-L44                | 1.56  | 0.02  | 0.22 | 0.76 |
| tRF5       | chr19.tRNA5-LysCTT-tRF5 | 4.33  | -0.02 | 0.22 | 0.76 |

|            |                          |       |       |      |      |
|------------|--------------------------|-------|-------|------|------|
| mir-5p     | hsa-miR-28-5p            | 5.11  | -0.01 | 0.22 | 0.76 |
| rRNA       | LSU-rRNA_Hsa-L58         | 7.02  | -0.01 | 0.22 | 0.76 |
| scRNA      | HY4-L154                 | 1.53  | -0.02 | 0.22 | 0.76 |
| rRNA       | 5S-L997                  | 1.97  | 0.02  | 0.22 | 0.76 |
| snRNA      | U2-L479                  | 1.54  | 0.02  | 0.22 | 0.76 |
| rRNA       | LSU-rRNA_Hsa-L297        | 1.90  | -0.02 | 0.22 | 0.76 |
| snoRNA     | HBII-336                 | 2.07  | 0.02  | 0.22 | 0.76 |
| piRNA      | piR-35548-L3             | 2.78  | -0.02 | 0.22 | 0.76 |
| tRF5       | chr3.tRNA5-LeuAAG-tRF5   | 3.59  | 0.01  | 0.22 | 0.76 |
| piRNA      | piR-31115-L4             | 7.28  | 0.01  | 0.23 | 0.76 |
| rRNA       | LSU-rRNA_Hsa-L378        | 2.46  | -0.02 | 0.23 | 0.76 |
| tRNA       | chr16.tRNA18-GlyGCC      | 1.78  | -0.02 | 0.23 | 0.76 |
| tRF5       | chr14.tRNA8-CysGCA-tRF5  | 2.18  | -0.02 | 0.23 | 0.76 |
| tRNA       | chr17.tRNA15-CysGCA      | 6.11  | -0.01 | 0.23 | 0.76 |
| rRNA       | LSU-rRNA_Hsa-L208        | 7.16  | 0.01  | 0.23 | 0.76 |
| scRNA      | HY1-L430                 | 1.34  | -0.02 | 0.23 | 0.76 |
| rRNA       | 5S-L115                  | 1.96  | 0.01  | 0.23 | 0.76 |
| mir-3p     | hsa-miR-23b-3p           | 3.56  | -0.01 | 0.23 | 0.76 |
| mir-3p     | hsa-miR-378a-3p          | 8.57  | -0.01 | 0.23 | 0.76 |
| rRNA       | 5S-L930                  | 1.75  | 0.01  | 0.23 | 0.76 |
| snoRNA     | U8-L17                   | 2.67  | 0.01  | 0.23 | 0.76 |
| rRNA       | LSU-rRNA_Hsa-L42         | 1.88  | -0.02 | 0.23 | 0.76 |
| snRNA      | U1-L43                   | 1.93  | 0.01  | 0.23 | 0.76 |
| mir-3p     | hsa-miR-191-3p           | 1.89  | -0.02 | 0.23 | 0.76 |
| mir-5p3pnc | hsa-miR-4326             | 1.51  | -0.02 | 0.23 | 0.76 |
| tRNA       | chr16.tRNA2-ArgCCT       | 3.09  | 0.01  | 0.23 | 0.76 |
| rRNA       | LSU-rRNA_Hsa-L150        | 3.40  | 0.01  | 0.23 | 0.76 |
| mir-3p     | hsa-miR-19a-3p           | 4.16  | -0.01 | 0.23 | 0.76 |
| snRNA      | U2-L161                  | 12.39 | 0.01  | 0.23 | 0.76 |
| tRF5       | chr16.tRNA23-LysTTT-tRF5 | 3.56  | -0.02 | 0.23 | 0.76 |
| rRNA       | LSU-rRNA_Hsa-L339        | 2.35  | -0.02 | 0.23 | 0.76 |
| mir-5p     | hsa-miR-1292-5p          | 1.70  | -0.02 | 0.24 | 0.76 |
| rRNA       | 5S-L1115                 | 1.30  | 0.02  | 0.24 | 0.76 |
| mir-3p     | hsa-miR-374a-3p          | 3.84  | -0.01 | 0.24 | 0.76 |
| mir-5p     | hsa-miR-199a-5p          | 6.35  | -0.01 | 0.24 | 0.77 |
| scRNA      | HY4-L20                  | 3.35  | -0.01 | 0.24 | 0.77 |
| snRNA      | U2-L1058                 | 6.70  | 0.01  | 0.24 | 0.77 |
| scRNA      | HY4-L35                  | 7.15  | -0.01 | 0.24 | 0.77 |
| mir-5p     | hsa-miR-503-5p           | 3.20  | -0.01 | 0.24 | 0.77 |
| scRNA      | HY1-L174                 | 1.36  | -0.02 | 0.24 | 0.77 |
| scRNA      | BC200-L8                 | 2.74  | 0.01  | 0.24 | 0.77 |
| mir-5p     | hsa-miR-192-5p           | 8.24  | -0.01 | 0.24 | 0.78 |
| rRNA       | LSU-rRNA_Hsa-L389        | 10.71 | 0.01  | 0.25 | 0.78 |

|            |                         |       |       |      |      |
|------------|-------------------------|-------|-------|------|------|
| scRNA      | BC200-L20               | 1.94  | -0.02 | 0.25 | 0.78 |
| rRNA       | 5S-L1152                | 1.59  | 0.01  | 0.25 | 0.78 |
| scRNA      | HY4-L12                 | 5.27  | -0.01 | 0.25 | 0.78 |
| mir-5p     | hsa-miR-1307-5p         | 1.42  | -0.02 | 0.25 | 0.78 |
| scRNA      | BC200-L27               | 2.97  | -0.01 | 0.25 | 0.78 |
| snoRNA     | U45C                    | 2.62  | -0.02 | 0.25 | 0.78 |
| snRNA      | U1-L174                 | 1.76  | 0.01  | 0.25 | 0.78 |
| scRNA      | BC200-L120              | 1.92  | 0.02  | 0.25 | 0.78 |
| mir-5p3pnc | hsa-miR-375             | 6.00  | -0.01 | 0.25 | 0.78 |
| mir-5p     | hsa-miR-130b-5p         | 4.40  | 0.01  | 0.25 | 0.79 |
| piRNA      | piR-32377               | 6.91  | -0.01 | 0.25 | 0.79 |
| tRF3       | chr6.tRNA36-ArgACG-tRF3 | 4.47  | -0.01 | 0.25 | 0.79 |
| mir-5p3pnc | hsa-miR-1908            | 3.10  | -0.01 | 0.26 | 0.79 |
| scRNA      | HY3-L34                 | 3.61  | -0.02 | 0.26 | 0.79 |
| mir-5p     | hsa-miR-223-5p          | 8.71  | -0.01 | 0.26 | 0.79 |
| scRNA      | HY4-L57                 | 2.80  | -0.01 | 0.26 | 0.79 |
| piRNA      | piR-60565-L9            | 1.87  | -0.02 | 0.26 | 0.79 |
| piRNA      | piR-43771-L6            | 2.90  | -0.01 | 0.26 | 0.79 |
| mir-5p3pnc | hsa-miR-484             | 6.24  | 0.01  | 0.26 | 0.79 |
| rRNA       | 5S-L1217                | 1.70  | 0.01  | 0.26 | 0.79 |
| mir-3p     | hsa-miR-425-3p          | 4.14  | -0.01 | 0.26 | 0.79 |
| scRNA      | HY3-L282                | 3.75  | 0.01  | 0.26 | 0.79 |
| scRNA      | HY4-L15                 | 7.92  | -0.01 | 0.26 | 0.79 |
| rRNA       | 5S-L282                 | 1.46  | 0.01  | 0.26 | 0.79 |
| tRNA       | chr6.tRNA98-LeuAAG      | 2.93  | -0.01 | 0.26 | 0.79 |
| tRNA       | chr6.tRNA63-IleTAT      | 1.53  | 0.02  | 0.26 | 0.79 |
| mir-3p     | hsa-miR-409-3p          | 5.71  | -0.01 | 0.27 | 0.79 |
| scRNA      | HY4-L32                 | 3.65  | -0.01 | 0.27 | 0.79 |
| mir-3p     | hsa-miR-1273g-3p        | 5.83  | 0.01  | 0.27 | 0.79 |
| snRNA      | U1-L71                  | 5.05  | -0.01 | 0.27 | 0.79 |
| tRNA       | chr6.tRNA85-PseudoTTC   | 4.59  | -0.01 | 0.27 | 0.79 |
| mir-3p     | hsa-miR-486-3p          | 10.93 | -0.01 | 0.27 | 0.79 |
| rRNA       | LSU-rRNA_Hsa-L147       | 2.70  | 0.01  | 0.27 | 0.79 |
| piRNA      | piR-36741               | 6.41  | -0.01 | 0.27 | 0.79 |
| scRNA      | HY1-L259                | 5.48  | -0.01 | 0.27 | 0.79 |
| scRNA      | BC200-L69               | 1.43  | 0.01  | 0.27 | 0.79 |
| mir-3p     | hsa-miR-30d-3p          | 1.67  | -0.01 | 0.27 | 0.79 |
| scRNA      | HY4-L107                | 9.96  | -0.01 | 0.27 | 0.79 |
| rRNA       | LSU-rRNA_Hsa-L53        | 2.22  | -0.01 | 0.27 | 0.79 |
| rRNA       | LSU-rRNA_Hsa-L200       | 2.74  | 0.01  | 0.27 | 0.80 |
| mir-5p3pnc | hsa-miR-1250            | 1.50  | -0.01 | 0.27 | 0.80 |
| scRNA      | HY4-L98                 | 9.97  | -0.01 | 0.27 | 0.80 |
| snoRNA     | U50B                    | 4.34  | -0.01 | 0.28 | 0.80 |

|            |                         |       |       |      |      |
|------------|-------------------------|-------|-------|------|------|
| snoRNA     | U64                     | 2.08  | -0.01 | 0.28 | 0.80 |
| tRNA       | chr12.tRNA10-AspGTC     | 4.59  | 0.01  | 0.28 | 0.80 |
| mir-5p3pnc | hsa-miR-548k            | 1.89  | 0.01  | 0.28 | 0.80 |
| scRNA      | HY4-L150                | 3.26  | 0.01  | 0.28 | 0.80 |
| rRNA       | 5S-L602                 | 5.12  | 0.01  | 0.28 | 0.80 |
| tRNA       | chr6.tRNA128-GlyGCC     | 4.35  | 0.01  | 0.28 | 0.80 |
| mir-5p3pnc | hsa-miR-181d            | 3.90  | -0.01 | 0.28 | 0.80 |
| mir-5p3pnc | hsa-miR-103b            | 8.26  | -0.01 | 0.28 | 0.80 |
| snRNA      | U2-L285                 | 2.96  | 0.01  | 0.28 | 0.80 |
| mir-5p     | hsa-miR-181a-5p-L2      | 8.55  | -0.01 | 0.28 | 0.80 |
| scRNA      | HY4-L87                 | 9.96  | 0.00  | 0.28 | 0.81 |
| mir-3p     | hsa-miR-324-3p          | 1.81  | -0.01 | 0.29 | 0.81 |
| mir-3p     | hsa-miR-654-3p          | 3.75  | -0.01 | 0.29 | 0.81 |
| piRNA      | piR-31447               | 1.47  | -0.02 | 0.29 | 0.81 |
| scRNA      | HY4-L126                | 3.61  | -0.01 | 0.29 | 0.81 |
| scRNA      | BC200-L101              | 1.85  | 0.02  | 0.29 | 0.81 |
| scRNA      | HY4-L56                 | 1.82  | -0.01 | 0.29 | 0.81 |
| mir-5p3pnc | hsa-miR-4447            | 1.30  | -0.02 | 0.29 | 0.81 |
| piRNA      | piR-36742               | 5.16  | -0.01 | 0.29 | 0.81 |
| rRNA       | 5S-L1262                | 1.38  | -0.02 | 0.29 | 0.81 |
| scRNA      | BC200-L154              | 1.41  | 0.01  | 0.29 | 0.81 |
| snoRNA     | U33                     | 4.23  | -0.01 | 0.29 | 0.81 |
| scRNA      | HY4-L135                | 18.67 | 0.00  | 0.29 | 0.81 |
| mir-5p3pnc | hsa-miR-4472-L2         | 1.83  | 0.01  | 0.29 | 0.81 |
| scRNA      | HY3-L479                | 2.10  | -0.02 | 0.30 | 0.82 |
| tRNA       | chr6.tRNA6-ArgACG       | 2.65  | -0.01 | 0.30 | 0.82 |
| mir-5p3pnc | hsa-miR-487b            | 1.50  | -0.02 | 0.30 | 0.82 |
| scRNA      | HY3-L372                | 2.47  | -0.02 | 0.30 | 0.82 |
| tRF5       | chr1.tRNA98-ValCAC-trF5 | 2.65  | 0.01  | 0.30 | 0.82 |
| mir-5p     | hsa-miR-4433-5p         | 5.15  | -0.01 | 0.30 | 0.82 |
| rRNA       | 5S-L1144                | 1.38  | -0.02 | 0.30 | 0.82 |
| scRNA      | HY3-L190                | 2.20  | -0.01 | 0.30 | 0.82 |
| scRNA      | BC200-L9                | 2.83  | 0.01  | 0.30 | 0.82 |
| mir-5p     | hsa-miR-3606-5p         | 2.63  | 0.02  | 0.30 | 0.82 |
| mir-5p     | hsa-miR-301a-5p         | 1.39  | -0.01 | 0.30 | 0.82 |
| rRNA       | SSU-rRNA_Hsa-L65        | 4.28  | 0.01  | 0.30 | 0.82 |
| mir-5p     | hsa-miR-1304-5p         | 1.47  | -0.02 | 0.30 | 0.82 |
| rRNA       | LSU-rRNA_Hsa-L66        | 1.86  | -0.01 | 0.30 | 0.82 |
| mir-3p     | hsa-miR-671-3p          | 4.05  | -0.01 | 0.31 | 0.82 |
| scRNA      | HY4-L109                | 2.11  | 0.01  | 0.31 | 0.82 |
| rRNA       | 5S-L21                  | 2.71  | 0.01  | 0.31 | 0.82 |
| rRNA       | 5S-L526                 | 1.32  | 0.02  | 0.31 | 0.82 |
| mir-3p     | hsa-miR-628-3p          | 3.76  | -0.01 | 0.31 | 0.82 |



|        |                          |       |       |      |      |
|--------|--------------------------|-------|-------|------|------|
| mir-3p | hsa-miR-339-3p           | 2.88  | -0.01 | 0.31 | 0.83 |
| snoRNA | U41                      | 2.48  | -0.02 | 0.31 | 0.83 |
| mir-5p | hsa-miR-4665-5p          | 1.60  | -0.02 | 0.31 | 0.83 |
| scRNA  | HY4-L129                 | 3.45  | -0.01 | 0.31 | 0.83 |
| mir-5p | hsa-miR-10a-5p           | 8.93  | -0.01 | 0.31 | 0.83 |
| scRNA  | HY4                      | 10.16 | 0.00  | 0.31 | 0.83 |
| piRNA  | piR-44716                | 4.74  | 0.04  | 0.31 | 0.83 |
| rRNA   | 5S-L746                  | 2.21  | 0.01  | 0.32 | 0.83 |
| tRF3   | chr6.tRNA153-IleAAT-tRF3 | 2.68  | 0.02  | 0.32 | 0.83 |
| mir-3p | hsa-miR-505-3p           | 2.00  | -0.01 | 0.32 | 0.83 |
| scRNA  | HY4-L10                  | 10.20 | 0.00  | 0.32 | 0.83 |
| mir-3p | hsa-miR-18a-3p           | 2.18  | -0.01 | 0.32 | 0.83 |
| tRNA   | chr6.tRNA78-LeuAAG       | 2.00  | -0.02 | 0.32 | 0.83 |
| tRNA   | chr16.tRNA32-LysCTT      | 2.11  | -0.01 | 0.32 | 0.83 |
| scRNA  | HY4-L97                  | 8.74  | 0.00  | 0.32 | 0.83 |
| scRNA  | HY4-L110                 | 1.99  | -0.01 | 0.32 | 0.83 |
| tRNA   | chr2.tRNA27-GlyCCC       | 8.80  | -0.01 | 0.32 | 0.83 |
| scRNA  | HY4-L46                  | 9.09  | 0.00  | 0.32 | 0.83 |
| mir-3p | hsa-miR-99b-3p           | 3.53  | -0.01 | 0.32 | 0.83 |
| rRNA   | LSU-rRNA_Hsa-L130        | 4.63  | 0.01  | 0.32 | 0.83 |
| piRNA  | piR-36323-L3             | 2.88  | -0.01 | 0.33 | 0.83 |
| snoRNA | U35A                     | 1.80  | 0.01  | 0.33 | 0.83 |
| tRNA   | chr1.tRNA119-LysCTT      | 7.12  | -0.01 | 0.33 | 0.83 |
| mir-5p | hsa-miR-486-5p           | 13.44 | -0.01 | 0.33 | 0.83 |
| snoRNA | U99                      | 3.13  | 0.01  | 0.33 | 0.83 |
| scRNA  | HY4-L17                  | 10.67 | 0.00  | 0.33 | 0.83 |
| tRF3   | chr6.tRNA37-ValAAC-tRF3  | 12.93 | -0.01 | 0.33 | 0.83 |
| snRNA  | U5-L67                   | 7.03  | 0.01  | 0.33 | 0.83 |
| mir-5p | hsa-miR-382-5p           | 5.88  | -0.01 | 0.33 | 0.83 |
| scRNA  | BC200-L62                | 2.72  | 0.01  | 0.33 | 0.83 |
| scRNA  | HY4-L69                  | 9.89  | 0.00  | 0.33 | 0.83 |
| rRNA   | 5S-L586                  | 2.14  | 0.01  | 0.33 | 0.83 |
| mir-3p | hsa-miR-185-3p           | 2.98  | -0.01 | 0.33 | 0.83 |
| scRNA  | BC200-L93                | 1.59  | 0.02  | 0.33 | 0.83 |
| scRNA  | HY4-L120                 | 9.92  | 0.00  | 0.33 | 0.83 |
| snRNA  | U6-L503                  | 1.31  | 0.01  | 0.33 | 0.83 |
| mir-3p | hsa-miR-500a-3p          | 3.32  | 0.01  | 0.33 | 0.83 |
| mir-5p | hsa-let-7a-5p            | 2.02  | -0.02 | 0.33 | 0.83 |
| piRNA  | piR-33082                | 7.18  | -0.01 | 0.33 | 0.83 |
| rRNA   | 5S-L1014                 | 1.63  | -0.02 | 0.33 | 0.84 |
| rRNA   | LSU-rRNA_Hsa-L249        | 7.95  | 0.01  | 0.34 | 0.84 |
| snRNA  | U1-L17                   | 1.83  | -0.02 | 0.34 | 0.84 |
| rRNA   | LSU-rRNA_Hsa-L298        | 3.46  | -0.01 | 0.34 | 0.84 |

|            |                          |       |       |      |      |
|------------|--------------------------|-------|-------|------|------|
| tRNA       | chr14.tRNA3-ProTGG       | 3.97  | -0.01 | 0.34 | 0.84 |
| piRNA      | piR-61647-L4             | 3.62  | -0.01 | 0.34 | 0.84 |
| tRF5       | chr17.tRNA25-SeCTCA-tRF5 | 2.25  | 0.01  | 0.34 | 0.84 |
| rRNA       | LSU-rRNA_Hsa-L247        | 1.53  | 0.01  | 0.34 | 0.84 |
| scRNA      | HY4-L111                 | 9.50  | 0.00  | 0.34 | 0.84 |
| rRNA       | 5S-L61                   | 2.67  | -0.01 | 0.34 | 0.84 |
| mir-5p3pnc | hsa-miR-6073             | 1.46  | 0.01  | 0.34 | 0.84 |
| mir-3p     | hsa-miR-139-3p           | 3.31  | -0.01 | 0.34 | 0.84 |
| tRNA       | chr6.tRNA86-PseudoTAC    | 2.07  | -0.01 | 0.35 | 0.84 |
| rRNA       | 5S-L389                  | 1.35  | 0.01  | 0.35 | 0.84 |
| rRNA       | 5S-L344                  | 2.37  | -0.01 | 0.35 | 0.84 |
| mir-5p     | hsa-miR-185-5p           | 8.24  | -0.01 | 0.35 | 0.84 |
| rRNA       | 5S-L530                  | 5.17  | -0.01 | 0.35 | 0.84 |
| rRNA       | 5S-L1178                 | 1.51  | -0.01 | 0.35 | 0.84 |
| scRNA      | HY4-L138                 | 8.42  | 0.00  | 0.35 | 0.84 |
| mir-3p     | hsa-miR-3177-3p          | 1.68  | 0.01  | 0.35 | 0.84 |
| mir-5p3pnc | hsa-miR-410              | 1.74  | -0.02 | 0.35 | 0.84 |
| snoRNA     | HBII-85-8                | 2.22  | 0.02  | 0.35 | 0.84 |
| mir-3p     | hsa-miR-330-3p           | 3.77  | -0.01 | 0.35 | 0.84 |
| rRNA       | LSU-rRNA_Hsa-L375        | 10.09 | -0.01 | 0.35 | 0.84 |
| mir-5p     | hsa-miR-30d-5p           | 10.84 | 0.00  | 0.35 | 0.84 |
| snoRNA     | HBII-135                 | 5.06  | 0.01  | 0.35 | 0.84 |
| mir-3p     | hsa-miR-1306-3p          | 2.00  | -0.01 | 0.35 | 0.84 |
| mir-5p3pnc | hsa-miR-378g             | 2.04  | 0.01  | 0.36 | 0.84 |
| scRNA      | HY5-L9                   | 1.40  | 0.01  | 0.36 | 0.84 |
| tRF3       | chr22.tRNA1-SeCTCA-tRF3  | 4.56  | 0.01  | 0.36 | 0.84 |
| snoRNA     | HBI-61                   | 3.49  | 0.01  | 0.36 | 0.84 |
| scRNA      | HY4-L136                 | 2.51  | -0.01 | 0.36 | 0.84 |
| rRNA       | 5S-L471                  | 2.19  | -0.01 | 0.36 | 0.84 |
| piRNA      | piR-33468-L4             | 2.34  | -0.01 | 0.36 | 0.84 |
| rRNA       | LSU-rRNA_Hsa-L220        | 4.41  | -0.01 | 0.36 | 0.84 |
| piRNA      | piR-52416                | 1.72  | 0.01  | 0.36 | 0.84 |
| tRF5       | chr1.tRNA90-ValCAC-tRF5  | 2.14  | -0.01 | 0.36 | 0.84 |
| mir-5p     | hsa-miR-335-5p           | 3.57  | -0.01 | 0.36 | 0.84 |
| rRNA       | 5S-L621                  | 1.23  | 0.01  | 0.36 | 0.84 |
| rRNA       | LSU-rRNA_Hsa-L60         | 12.44 | 0.01  | 0.36 | 0.84 |
| mir-3p     | hsa-miR-148a-3p          | 13.46 | -0.01 | 0.36 | 0.84 |
| snRNA      | U5-L108                  | 2.23  | -0.02 | 0.36 | 0.84 |
| snoRNA     | mgU6-47                  | 1.72  | 0.01  | 0.36 | 0.84 |
| mir-5p     | hsa-let-7e-5p            | 5.52  | 0.01  | 0.36 | 0.84 |
| scRNA      | BC200-L126               | 3.33  | 0.01  | 0.36 | 0.84 |
| mir-5p3pnc | hsa-miR-3615             | 7.34  | 0.00  | 0.36 | 0.84 |
| scRNA      | HY4-L54                  | 6.72  | 0.00  | 0.36 | 0.84 |

|            |                             |       |       |      |      |
|------------|-----------------------------|-------|-------|------|------|
| snoRNA     | E3                          | 2.67  | -0.01 | 0.37 | 0.84 |
| tRF3       | chr16.tRNA11-ProAGG-tRF3    | 1.79  | -0.01 | 0.37 | 0.84 |
| scRNA      | BC200-L159                  | 1.51  | 0.01  | 0.37 | 0.84 |
| scRNA      | HY1-L409                    | 2.73  | 0.01  | 0.37 | 0.84 |
| mir-5p3pnc | hsa-miR-320d-L2             | 3.63  | 0.01  | 0.37 | 0.84 |
| mir-5p     | hsa-miR-186-5p              | 6.23  | -0.01 | 0.37 | 0.84 |
| tRNA       | chr13.tRNA4-GluCTC          | 2.04  | -0.01 | 0.37 | 0.84 |
| snoRNA     | ACA44                       | 2.30  | 0.01  | 0.37 | 0.84 |
| mir-5p     | hsa-miR-150-5p              | 5.10  | -0.01 | 0.37 | 0.84 |
| mir-3p     | hsa-miR-574-3p              | 1.66  | -0.01 | 0.37 | 0.84 |
| tRF5       | chr1.tRNA109-PseudoGTT-tRF5 | 1.70  | -0.01 | 0.37 | 0.84 |
| mir-5p3pnc | hsa-miR-511-L2              | 3.90  | -0.01 | 0.37 | 0.84 |
| scRNA      | HY4-L66                     | 7.15  | 0.00  | 0.37 | 0.84 |
| rRNA       | LSU-rRNA_Hsa-L203           | 5.91  | 0.01  | 0.37 | 0.84 |
| rRNA       | 5S-L489                     | 5.18  | -0.02 | 0.37 | 0.84 |
| scRNA      | HY4-L43                     | 2.22  | -0.01 | 0.37 | 0.84 |
| scRNA      | HY1-L183                    | 2.44  | 0.01  | 0.37 | 0.84 |
| scRNA      | HY4-L92                     | 1.42  | 0.01  | 0.37 | 0.84 |
| mir-3p     | hsa-miR-1307-3p             | 7.96  | -0.01 | 0.38 | 0.84 |
| rRNA       | LSU-rRNA_Hsa-L188           | 1.82  | -0.01 | 0.38 | 0.85 |
| mir-5p     | hsa-miR-221-5p              | 3.85  | -0.01 | 0.38 | 0.85 |
| scRNA      | BC200-L100                  | 1.69  | 0.02  | 0.38 | 0.85 |
| snoRNA     | HBII-382                    | 2.17  | -0.01 | 0.38 | 0.85 |
| piRNA      | piR-35548-L4                | 7.22  | -0.01 | 0.38 | 0.85 |
| mir-5p     | hsa-miR-93-5p               | 7.11  | -0.01 | 0.38 | 0.85 |
| mir-5p     | hsa-miR-338-5p              | 4.39  | -0.01 | 0.38 | 0.85 |
| mir-5p     | hsa-miR-20a-5p              | 7.17  | -0.01 | 0.38 | 0.85 |
| snoRNA     | HBI-43                      | 3.60  | 0.01  | 0.38 | 0.85 |
| scRNA      | HY4-L28                     | 6.48  | 0.00  | 0.38 | 0.85 |
| mir-3p     | hsa-miR-125a-3p             | 3.83  | 0.01  | 0.39 | 0.85 |
| tRNA       | chr17.tRNA14-ThrCGT         | 1.87  | -0.01 | 0.39 | 0.85 |
| mir-5p3pnc | hsa-miR-543                 | 5.86  | -0.01 | 0.39 | 0.85 |
| mir-5p     | hsa-miR-654-5p              | 3.09  | -0.01 | 0.39 | 0.85 |
| scRNA      | HY4-L102                    | 8.16  | 0.00  | 0.39 | 0.85 |
| scRNA      | HY4-L116                    | 3.88  | -0.01 | 0.39 | 0.85 |
| rRNA       | LSU-rRNA_Hsa-L380           | 13.98 | 0.00  | 0.39 | 0.85 |
| scRNA      | HY1-L352                    | 1.78  | 0.01  | 0.39 | 0.85 |
| mir-5p     | hsa-miR-196b-5p             | 2.79  | 0.01  | 0.39 | 0.85 |
| mir-3p     | hsa-miR-3529-3p             | 7.65  | 0.00  | 0.39 | 0.85 |
| mir-3p     | hsa-miR-3613-3p             | 1.73  | -0.01 | 0.39 | 0.85 |
| tRNA       | chr14.tRNA2-LeuTAG          | 2.26  | -0.01 | 0.39 | 0.85 |
| snoRNA     | HBII-142                    | 3.42  | -0.01 | 0.39 | 0.85 |
| rRNA       | LSU-rRNA_Hsa-L174           | 1.61  | 0.01  | 0.39 | 0.85 |

|            |                             |      |       |      |      |
|------------|-----------------------------|------|-------|------|------|
| snoRNA     | ACA46                       | 2.20 | 0.01  | 0.39 | 0.85 |
| scRNA      | HY1-L435                    | 3.49 | 0.01  | 0.39 | 0.85 |
| scRNA      | HY4-L53                     | 3.75 | -0.01 | 0.39 | 0.85 |
| rRNA       | 5S-L103                     | 3.03 | -0.01 | 0.39 | 0.85 |
| tRNA       | chr1.tRNA54-LysTTT          | 8.24 | -0.01 | 0.40 | 0.86 |
| mir-3p     | hsa-miR-342-3p              | 3.63 | -0.01 | 0.40 | 0.86 |
| mir-5p     | hsa-miR-145-5p              | 1.79 | 0.01  | 0.40 | 0.86 |
| rRNA       | LSU-rRNA_Hsa-L230           | 3.37 | 0.01  | 0.40 | 0.86 |
| piRNA      | piR-41588                   | 1.60 | 0.01  | 0.40 | 0.86 |
| piRNA      | piR-33468                   | 1.61 | 0.01  | 0.40 | 0.86 |
| piRNA      | piR-61298                   | 1.91 | -0.02 | 0.40 | 0.86 |
| mir-5p     | hsa-miR-92b-5p              | 2.27 | 0.01  | 0.40 | 0.86 |
| rRNA       | 5S-L550                     | 2.32 | 0.01  | 0.40 | 0.86 |
| rRNA       | LSU-rRNA_Hsa-L348           | 1.92 | -0.01 | 0.40 | 0.86 |
| snRNA      | U1-L63                      | 2.53 | 0.01  | 0.40 | 0.86 |
| tRF5       | chr1.tRNA132-PseudoCAC-tRF5 | 2.10 | 0.01  | 0.40 | 0.86 |
| rRNA       | 5S-L1075                    | 3.11 | 0.01  | 0.41 | 0.86 |
| scRNA      | HY3-L82                     | 3.20 | 0.01  | 0.41 | 0.86 |
| tRNA       | chr5.tRNA14-ProTGG          | 4.85 | -0.01 | 0.41 | 0.86 |
| rRNA       | 5S-L109                     | 9.56 | 0.00  | 0.41 | 0.86 |
| snoRNA     | U102                        | 7.38 | -0.01 | 0.41 | 0.86 |
| tRNA       | chr6.tRNA129-MetCAT         | 5.33 | -0.01 | 0.41 | 0.86 |
| mir-5p     | hsa-miR-27b-5p              | 1.72 | -0.01 | 0.41 | 0.86 |
| mir-5p3pnc | hsa-miR-370                 | 4.87 | -0.01 | 0.41 | 0.86 |
| rRNA       | LSU-rRNA_Hsa-L29            | 2.54 | 0.01  | 0.42 | 0.86 |
| snRNA      | U17-L2                      | 2.12 | -0.01 | 0.42 | 0.86 |
| mir-3p     | hsa-miR-652-3p              | 3.92 | -0.01 | 0.42 | 0.86 |
| mir-3p     | hsa-miR-576-3p              | 4.04 | -0.01 | 0.42 | 0.86 |
| mir-5p     | hsa-miR-374a-5p             | 2.91 | -0.01 | 0.42 | 0.86 |
| snoRNA     | U83A                        | 3.52 | 0.01  | 0.42 | 0.86 |
| mir-5p     | hsa-miR-454-5p              | 2.36 | -0.01 | 0.42 | 0.86 |
| mir-5p3pnc | hsa-miR-651                 | 3.29 | -0.01 | 0.42 | 0.86 |
| snoRNA     | HBI-115                     | 2.00 | -0.01 | 0.42 | 0.86 |
| mir-5p     | hsa-miR-151a-5p             | 6.40 | -0.01 | 0.42 | 0.86 |
| mir-3p     | hsa-miR-548g-3p             | 2.15 | -0.01 | 0.42 | 0.86 |
| mir-3p     | hsa-miR-130a-3p             | 3.58 | -0.01 | 0.42 | 0.86 |
| scRNA      | HY4-L14                     | 8.83 | 0.00  | 0.42 | 0.86 |
| scRNA      | HY4-L42                     | 1.44 | -0.01 | 0.42 | 0.86 |
| tRNA       | chr6.tRNA122-PseudoTGC      | 2.61 | -0.01 | 0.42 | 0.86 |
| rRNA       | LSU-rRNA_Hsa-L143           | 5.07 | 0.00  | 0.42 | 0.86 |
| mir-5p     | hsa-miR-96-5p               | 2.19 | 0.01  | 0.42 | 0.86 |
| piRNA      | piR-36074                   | 4.27 | -0.01 | 0.42 | 0.86 |
| scRNA      | HY1-L37                     | 6.31 | -0.01 | 0.42 | 0.86 |

|            |                        |       |       |      |      |
|------------|------------------------|-------|-------|------|------|
| rRNA       | LSU-rRNA_Hsa-L189      | 4.24  | 0.01  | 0.43 | 0.86 |
| piRNA      | piR-33650              | 3.05  | 0.01  | 0.43 | 0.86 |
| mir-3p     | hsa-miR-30a-3p         | 5.31  | -0.01 | 0.43 | 0.86 |
| mir-5p     | hsa-miR-23b-5p         | 1.51  | -0.01 | 0.43 | 0.86 |
| snRNA      | U14-L5                 | 4.25  | -0.01 | 0.43 | 0.86 |
| snRNA      | U6-L1308               | 2.67  | -0.01 | 0.43 | 0.86 |
| mir-5p     | hsa-let-7f-5p-L2       | 6.10  | 0.00  | 0.43 | 0.86 |
| scRNA      | HY4-L38                | 4.19  | -0.01 | 0.43 | 0.86 |
| tRNA       | chr16.tRNA27-LeuTAG    | 2.12  | -0.01 | 0.43 | 0.86 |
| mir-3p     | hsa-miR-92a-3p         | 11.39 | 0.00  | 0.43 | 0.86 |
| tRNA       | chr6.tRNA168-TrpCCA    | 2.05  | -0.01 | 0.43 | 0.86 |
| rRNA       | 5S-L688                | 4.43  | 0.01  | 0.43 | 0.86 |
| tRNA       | chr2.tRNA23-GlnTTG     | 3.06  | -0.01 | 0.43 | 0.86 |
| tRNA       | chr7.tRNA3-ArgCCT      | 5.38  | 0.00  | 0.43 | 0.86 |
| snRNA      | U2-L388                | 3.41  | 0.01  | 0.43 | 0.86 |
| snoRNA     | U105B                  | 4.75  | 0.01  | 0.43 | 0.86 |
| tRNA       | chr1.tRNA110-PseudoTTC | 1.44  | -0.01 | 0.43 | 0.87 |
| piRNA      | piR-34535              | 5.56  | -0.01 | 0.44 | 0.87 |
| snoRNA     | U45B                   | 2.57  | -0.01 | 0.44 | 0.87 |
| snoRNA     | ACA51                  | 2.14  | 0.01  | 0.44 | 0.87 |
| rRNA       | 5S-L98                 | 9.83  | 0.00  | 0.44 | 0.87 |
| snoRNA     | HBII-420               | 4.25  | -0.01 | 0.44 | 0.87 |
| scRNA      | HY1-L159               | 4.34  | 0.01  | 0.44 | 0.87 |
| tRF3       | chr3.tRNA2-ValAAC-tRF3 | 4.15  | 0.01  | 0.44 | 0.87 |
| piRNA      | piR-61648-L7           | 4.08  | -0.01 | 0.44 | 0.87 |
| mir-5p     | hsa-miR-148a-5p        | 4.17  | 0.01  | 0.44 | 0.87 |
| snoRNA     | U73a                   | 1.79  | -0.02 | 0.44 | 0.87 |
| scRNA      | HY4-L71                | 5.97  | 0.00  | 0.44 | 0.87 |
| mir-5p     | hsa-miR-1255b-5p-L2    | 1.62  | -0.01 | 0.44 | 0.87 |
| scRNA      | HY3-L203               | 1.78  | 0.01  | 0.45 | 0.87 |
| scRNA      | HY4-L93                | 3.97  | -0.01 | 0.45 | 0.88 |
| piRNA      | piR-37525              | 1.54  | -0.01 | 0.45 | 0.88 |
| rRNA       | LSU-rRNA_Hsa-L381      | 2.74  | 0.01  | 0.45 | 0.88 |
| rRNA       | 5S-L995                | 3.46  | 0.02  | 0.45 | 0.88 |
| mir-3p     | hsa-miR-335-3p         | 3.66  | -0.01 | 0.45 | 0.88 |
| scRNA      | HY1-L439               | 2.44  | -0.01 | 0.45 | 0.88 |
| snoRNA     | U18B                   | 2.75  | 0.01  | 0.45 | 0.88 |
| scRNA      | HY3-L105               | 3.97  | -0.01 | 0.45 | 0.88 |
| mir-3p     | hsa-miR-181a-3p        | 2.62  | 0.01  | 0.45 | 0.88 |
| piRNA      | piR-61648              | 2.28  | 0.01  | 0.45 | 0.88 |
| mir-5p3pnc | hsa-miR-378f           | 1.69  | 0.01  | 0.46 | 0.88 |
| scRNA      | HY4-L153               | 8.62  | 0.00  | 0.46 | 0.88 |
| tRNA       | chr1.tRNA79-GlyTCC     | 1.87  | 0.01  | 0.46 | 0.88 |

|            |                         |      |       |      |      |
|------------|-------------------------|------|-------|------|------|
| tRNA       | chr3.tRNA10-PseudoCTC   | 7.60 | 0.00  | 0.46 | 0.88 |
| mir-5p     | hsa-miR-4787-5p         | 1.33 | 0.01  | 0.46 | 0.88 |
| scRNA      | HY4-L122                | 7.82 | 0.00  | 0.46 | 0.88 |
| tRNA       | chr1.tRNA81-AspGTC      | 4.35 | -0.01 | 0.46 | 0.88 |
| rRNA       | 5S-L1164                | 2.08 | -0.01 | 0.46 | 0.88 |
| piRNA      | piR-33151-L8            | 4.43 | 0.01  | 0.46 | 0.88 |
| mir-5p3pnc | hsa-miR-1-L2            | 4.82 | -0.01 | 0.46 | 0.88 |
| rRNA       | LSU-rRNA_Hsa-L51        | 4.19 | -0.01 | 0.46 | 0.88 |
| tRNA       | chr6.tRNA83-LeuTAA      | 2.22 | 0.01  | 0.46 | 0.88 |
| rRNA       | LSU-rRNA_Hsa-L63        | 4.97 | 0.01  | 0.46 | 0.88 |
| scRNA      | HY3-L492                | 1.45 | 0.01  | 0.46 | 0.88 |
| tRNA       | chr14.tRNA8-CysGCA      | 4.27 | -0.01 | 0.46 | 0.88 |
| mir-5p3pnc | hsa-miR-378d-L2         | 1.37 | 0.01  | 0.46 | 0.88 |
| rRNA       | 5S-L500                 | 1.78 | 0.01  | 0.46 | 0.88 |
| rRNA       | 5S-L357                 | 2.11 | 0.01  | 0.46 | 0.88 |
| snRNA      | U7-L159                 | 1.62 | 0.01  | 0.47 | 0.88 |
| mir-5p     | hsa-miR-409-5p          | 1.55 | -0.01 | 0.47 | 0.88 |
| piRNA      | piR-45195-L2            | 1.33 | 0.02  | 0.47 | 0.88 |
| scRNA      | HY3-L518                | 8.30 | 0.00  | 0.47 | 0.88 |
| snoRNA     | U3-4                    | 7.31 | -0.01 | 0.47 | 0.88 |
| rRNA       | LSU-rRNA_Hsa-L251       | 7.46 | 0.00  | 0.47 | 0.88 |
| snoRNA     | ACA36                   | 1.90 | -0.01 | 0.47 | 0.88 |
| tRF5       | chr16.tRNA8-ProTGG-tRF5 | 2.11 | -0.01 | 0.47 | 0.88 |
| mir-3p     | hsa-let-7d-3p           | 6.61 | 0.00  | 0.47 | 0.88 |
| mir-3p     | hsa-miR-29b-3p          | 2.25 | -0.01 | 0.47 | 0.88 |
| mir-5p     | hsa-miR-200c-5p         | 2.02 | 0.02  | 0.47 | 0.88 |
| snoRNA     | U27                     | 4.90 | 0.01  | 0.47 | 0.88 |
| scRNA      | HY1-L247                | 1.49 | 0.01  | 0.47 | 0.88 |
| scRNA      | HY1-L192                | 5.99 | 0.00  | 0.47 | 0.88 |
| rRNA       | 5S-L137                 | 1.95 | 0.01  | 0.48 | 0.88 |
| snRNA      | U17                     | 1.81 | 0.01  | 0.48 | 0.88 |
| snoRNA     | U96a                    | 3.47 | -0.01 | 0.48 | 0.88 |
| scRNA      | BC200-L146              | 2.61 | -0.01 | 0.48 | 0.88 |
| scRNA      | HY3-L359                | 1.92 | 0.01  | 0.48 | 0.88 |
| tRNA       | chr16.tRNA33-PseudoAGG  | 3.64 | -0.01 | 0.48 | 0.88 |
| snoRNA     | HBII-210                | 5.47 | 0.01  | 0.48 | 0.88 |
| mir-3p     | hsa-miR-570-3p          | 1.85 | -0.01 | 0.48 | 0.88 |
| snoRNA     | U87                     | 1.65 | -0.01 | 0.48 | 0.88 |
| piRNA      | piR-31986               | 8.37 | -0.01 | 0.48 | 0.88 |
| rRNA       | LSU-rRNA_Hsa-L266       | 3.17 | -0.01 | 0.48 | 0.88 |
| mir-5p     | hsa-miR-122-5p          | 9.88 | 0.01  | 0.48 | 0.88 |
| mir-3p     | hsa-miR-142-3p          | 5.68 | 0.00  | 0.48 | 0.88 |
| snoRNA     | SNORD126                | 2.74 | -0.01 | 0.49 | 0.88 |

|            |                        |      |       |      |      |
|------------|------------------------|------|-------|------|------|
| mir-5p     | hsa-miR-99a-5p         | 7.41 | -0.01 | 0.49 | 0.88 |
| snoRNA     | HBII-55                | 4.50 | 0.01  | 0.49 | 0.88 |
| scRNA      | HY1-L121               | 2.71 | -0.01 | 0.49 | 0.88 |
| scRNA      | HY3-L208               | 1.34 | 0.01  | 0.49 | 0.88 |
| snRNA      | U4-L40                 | 2.99 | 0.01  | 0.49 | 0.88 |
| mir-5p3pnc | hsa-miR-1301           | 4.06 | -0.01 | 0.49 | 0.88 |
| rRNA       | 5S-L99                 | 8.58 | 0.00  | 0.49 | 0.88 |
| snoRNA     | U21                    | 4.60 | -0.01 | 0.49 | 0.88 |
| mir-5p3pnc | hsa-miR-95             | 2.72 | -0.01 | 0.49 | 0.88 |
| tRNA       | chr17.tRNA3-GlnCTG     | 6.70 | 0.00  | 0.49 | 0.88 |
| rRNA       | 5S-L877                | 2.33 | 0.01  | 0.49 | 0.88 |
| mir-5p3pnc | hsa-miR-1294           | 1.62 | -0.01 | 0.49 | 0.88 |
| snoRNA     | HBII-85-3              | 2.57 | -0.01 | 0.49 | 0.88 |
| scRNA      | HY1-L208               | 3.29 | -0.01 | 0.49 | 0.88 |
| mir-3p     | hsa-miR-542-3p         | 3.59 | -0.01 | 0.49 | 0.88 |
| scRNA      | BC200-L43              | 3.28 | 0.01  | 0.49 | 0.88 |
| rRNA       | 5S-L1143               | 1.64 | 0.01  | 0.49 | 0.88 |
| tRNA       | chr7.tRNA8-CysGCA      | 1.87 | 0.01  | 0.49 | 0.88 |
| snoRNA     | ACA66                  | 2.24 | 0.01  | 0.50 | 0.88 |
| scRNA      | BC200-L91              | 1.97 | -0.01 | 0.50 | 0.88 |
| mir-5p     | hsa-miR-425-5p         | 5.12 | -0.01 | 0.50 | 0.88 |
| mir-5p     | hsa-miR-99b-5p         | 6.89 | 0.00  | 0.50 | 0.88 |
| rRNA       | 5S-L254                | 2.29 | -0.01 | 0.50 | 0.88 |
| mir-3p     | hsa-miR-106b-3p        | 7.66 | 0.00  | 0.50 | 0.88 |
| snoRNA     | snR39B                 | 5.72 | 0.01  | 0.50 | 0.88 |
| rRNA       | 5S-L583                | 2.69 | -0.01 | 0.50 | 0.88 |
| piRNA      | piR-31115-L2           | 6.67 | 0.00  | 0.50 | 0.88 |
| snoRNA     | U52                    | 2.73 | -0.01 | 0.50 | 0.88 |
| tRF5       | chr4.tRNA3-CysGCA-tRF5 | 1.61 | 0.01  | 0.50 | 0.88 |
| scRNA      | HY1-L103               | 2.46 | -0.01 | 0.50 | 0.88 |
| rRNA       | 5S-L829                | 2.65 | 0.01  | 0.50 | 0.88 |
| rRNA       | 5S-L472                | 2.70 | 0.01  | 0.50 | 0.88 |
| mir-3p     | hsa-miR-15b-3p         | 3.61 | -0.01 | 0.50 | 0.88 |
| mir-5p3pnc | hsa-miR-421            | 2.77 | -0.01 | 0.50 | 0.88 |
| tRNA       | chr7.tRNA21-CysGCA     | 1.68 | -0.01 | 0.50 | 0.88 |
| rRNA       | SSU-rRNA_Hsa-L16       | 6.78 | -0.01 | 0.51 | 0.88 |
| snoRNA     | U16                    | 2.75 | 0.01  | 0.51 | 0.88 |
| rRNA       | 5S-L819                | 2.01 | 0.01  | 0.51 | 0.88 |
| tRNA       | chr14.tRNA12-PseudoTTT | 1.55 | 0.01  | 0.51 | 0.88 |
| snoRNA     | HBII-180C              | 4.12 | 0.01  | 0.51 | 0.88 |
| mir-5p     | hsa-miR-106a-5p        | 2.83 | 0.01  | 0.51 | 0.88 |
| snRNA      | U1-L138                | 3.38 | -0.01 | 0.51 | 0.88 |
| mir-5p     | hsa-miR-17-5p          | 5.08 | -0.01 | 0.51 | 0.88 |

|            |                         |       |       |      |      |
|------------|-------------------------|-------|-------|------|------|
| mir-5p     | hsa-miR-27a-5p          | 4.98  | 0.00  | 0.51 | 0.88 |
| rRNA       | LSU-rRNA_Hsa-L164       | 5.97  | 0.00  | 0.51 | 0.88 |
| mir-5p     | hsa-miR-148b-5p         | 2.86  | -0.01 | 0.51 | 0.88 |
| snoRNA     | U23                     | 1.46  | 0.01  | 0.51 | 0.88 |
| scRNA      | BC200-L82               | 1.75  | -0.01 | 0.51 | 0.88 |
| rRNA       | 5S-L255                 | 2.65  | 0.01  | 0.51 | 0.88 |
| snRNA      | U6-L1561                | 2.12  | -0.01 | 0.51 | 0.88 |
| mir-5p3pnc | hsa-miR-5096            | 2.21  | -0.01 | 0.51 | 0.88 |
| piRNA      | piR-35411-L4            | 2.53  | -0.01 | 0.52 | 0.88 |
| rRNA       | 5S-L367                 | 1.91  | -0.01 | 0.52 | 0.88 |
| scRNA      | HY1-L114                | 3.94  | 0.01  | 0.52 | 0.89 |
| rRNA       | 5S-L1214                | 1.33  | 0.01  | 0.52 | 0.89 |
| piRNA      | piR-35469               | 1.70  | -0.01 | 0.52 | 0.89 |
| scRNA      | BC200-L16               | 1.59  | 0.01  | 0.52 | 0.89 |
| scRNA      | HY4-L6                  | 3.98  | 0.00  | 0.52 | 0.89 |
| piRNA      | piR-32678-L3            | 10.98 | 0.00  | 0.52 | 0.89 |
| snoRNA     | U83                     | 2.97  | -0.01 | 0.52 | 0.89 |
| piRNA      | piR-36376               | 2.64  | -0.01 | 0.52 | 0.89 |
| tRNA       | chr6.tRNA133-ValCAC     | 2.93  | -0.01 | 0.52 | 0.89 |
| snoRNA     | ACA7                    | 2.30  | 0.01  | 0.52 | 0.89 |
| mir-5p3pnc | hsa-miR-1278            | 1.56  | 0.01  | 0.52 | 0.89 |
| tRNA       | chr22.tRNA1-SeCTCA      | 2.22  | 0.01  | 0.52 | 0.89 |
| scRNA      | HY1-L321                | 4.61  | 0.00  | 0.53 | 0.89 |
| rRNA       | LSU-rRNA_Hsa-L18        | 5.98  | 0.01  | 0.53 | 0.89 |
| snoRNA     | ACA36B                  | 3.83  | 0.00  | 0.53 | 0.89 |
| scRNA      | BC200-L72               | 1.58  | -0.01 | 0.53 | 0.89 |
| scRNA      | HY1-L13                 | 2.51  | 0.01  | 0.53 | 0.89 |
| tRF5       | chr8.tRNA12-TyrGTA-tRF5 | 2.21  | 0.01  | 0.53 | 0.89 |
| rRNA       | 5S-L758                 | 2.59  | 0.01  | 0.53 | 0.89 |
| rRNA       | LSU-rRNA_Hsa-L162       | 2.42  | -0.01 | 0.53 | 0.89 |
| mir-5p     | hsa-miR-25-5p           | 2.07  | -0.01 | 0.53 | 0.89 |
| tRNA       | chr6.tRNA66-AlaTGC      | 1.95  | 0.01  | 0.53 | 0.89 |
| mir-3p     | hsa-miR-382-3p          | 2.29  | -0.01 | 0.53 | 0.89 |
| tRNA       | chr6.tRNA130-GlnTTG     | 3.35  | 0.01  | 0.53 | 0.89 |
| snRNA      | U3-L4                   | 1.56  | -0.01 | 0.53 | 0.89 |
| piRNA      | piR-36170               | 2.57  | 0.01  | 0.54 | 0.89 |
| rRNA       | SSU-rRNA_Hsa-L34        | 5.52  | 0.00  | 0.54 | 0.89 |
| scRNA      | HY4-L61                 | 5.54  | 0.00  | 0.54 | 0.89 |
| mir-3p     | hsa-miR-539-3p          | 1.61  | 0.01  | 0.54 | 0.89 |
| scRNA      | HY4-L114                | 2.44  | -0.01 | 0.54 | 0.89 |
| mir-3p     | hsa-miR-3184-3p         | 11.60 | 0.00  | 0.54 | 0.89 |
| scRNA      | HY1-L419                | 3.95  | 0.00  | 0.54 | 0.89 |
| rRNA       | 5S-L578                 | 2.37  | -0.01 | 0.54 | 0.89 |



|            |                            |       |       |      |      |
|------------|----------------------------|-------|-------|------|------|
| mir-3p     | hsa-miR-126-3p             | 11.12 | 0.00  | 0.54 | 0.89 |
| tRNA       | chr6.tRNA157-ValCAC        | 1.40  | -0.01 | 0.54 | 0.89 |
| mir-5p     | hsa-miR-132-5p             | 2.49  | -0.01 | 0.54 | 0.89 |
| rRNA       | SSU-rRNA_Hsa-L30           | 11.12 | 0.00  | 0.54 | 0.89 |
| tRNA       | chr1.tRNA52-ProCGG         | 2.13  | 0.01  | 0.54 | 0.89 |
| piRNA      | piR-48772-L2               | 1.95  | -0.01 | 0.54 | 0.89 |
| tRNA       | chr16.tRNA4-ProAGG         | 2.50  | -0.01 | 0.54 | 0.89 |
| tRNA       | chr6.tRNA143-LysTTT        | 5.55  | 0.01  | 0.54 | 0.89 |
| snoRNA     | ACA21                      | 2.76  | 0.01  | 0.54 | 0.89 |
| scRNA      | HY3-L512                   | 2.06  | 0.01  | 0.55 | 0.89 |
| rRNA       | LSU-rRNA_Hsa-L221          | 2.74  | 0.01  | 0.55 | 0.89 |
| scRNA      | HY4-L146                   | 1.61  | -0.01 | 0.55 | 0.90 |
| mir-5p     | hsa-miR-144-5p             | 5.62  | 0.01  | 0.55 | 0.90 |
| mir-3p     | hsa-miR-29a-3p             | 5.96  | 0.00  | 0.55 | 0.90 |
| scRNA      | BC200-L167                 | 1.58  | 0.01  | 0.55 | 0.90 |
| mir-5p     | hsa-miR-139-5p             | 6.03  | 0.00  | 0.55 | 0.90 |
| scRNA      | HY1-L326                   | 1.43  | 0.01  | 0.55 | 0.90 |
| mir-5p3pnc | hsa-miR-494                | 1.75  | -0.01 | 0.55 | 0.90 |
| piRNA      | piR-36494                  | 2.00  | -0.01 | 0.56 | 0.90 |
| snoRNA     | U61                        | 5.55  | 0.01  | 0.56 | 0.90 |
| rRNA       | 5S-L317                    | 1.26  | 0.01  | 0.56 | 0.90 |
| mir-5p     | hsa-miR-22-5p              | 3.80  | -0.01 | 0.56 | 0.90 |
| tRF5       | chr3.tRNA9-PseudoTTG-tRF5  | 1.99  | -0.01 | 0.56 | 0.90 |
| tRNA       | chr2.tRNA14-TyrATA         | 3.30  | -0.01 | 0.56 | 0.91 |
| piRNA      | piR-33151-L4               | 4.06  | 0.00  | 0.57 | 0.91 |
| rRNA       | 5S-L101                    | 9.06  | 0.00  | 0.57 | 0.91 |
| scRNA      | HY1-L269                   | 1.87  | -0.01 | 0.57 | 0.91 |
| scRNA      | HY4-L59                    | 4.56  | 0.00  | 0.57 | 0.91 |
| snoRNA     | SNORD125                   | 1.69  | 0.01  | 0.57 | 0.91 |
| mir-5p     | hsa-miR-26a-5p-L2          | 10.75 | 0.00  | 0.57 | 0.91 |
| tRNA       | chr5.tRNA22-AspGTC         | 1.97  | 0.01  | 0.57 | 0.91 |
| scRNA      | HY4-L160                   | 7.28  | 0.00  | 0.57 | 0.91 |
| rRNA       | 5S-L1071                   | 1.54  | -0.01 | 0.57 | 0.91 |
| mir-5p     | hsa-miR-26b-5p             | 8.15  | 0.00  | 0.57 | 0.91 |
| tRF3       | chr10.tRNA5-PseudoCTG-tRF3 | 1.70  | -0.01 | 0.57 | 0.91 |
| scRNA      | HY1-L124                   | 1.84  | 0.01  | 0.57 | 0.91 |
| scRNA      | HY4-L52                    | 2.37  | 0.00  | 0.57 | 0.91 |
| rRNA       | LSU-rRNA_Hsa-L163          | 9.10  | -0.01 | 0.57 | 0.91 |
| piRNA      | piR-36716                  | 2.87  | -0.01 | 0.57 | 0.91 |
| rRNA       | LSU-rRNA_Hsa-L124          | 2.33  | 0.01  | 0.57 | 0.91 |
| tRNA       | chr1.tRNA58-LeuCAA         | 3.40  | 0.00  | 0.57 | 0.91 |
| mir-3p     | hsa-miR-199b-3p            | 7.58  | 0.00  | 0.58 | 0.91 |
| mir-5p     | hsa-miR-345-5p             | 2.70  | 0.01  | 0.58 | 0.91 |

|            |                            |       |       |      |      |
|------------|----------------------------|-------|-------|------|------|
| tRF3       | chr18.tRNA2-PseudoTCC-tRF3 | 3.09  | -0.01 | 0.58 | 0.91 |
| snoRNA     | U81                        | 6.27  | -0.01 | 0.58 | 0.91 |
| snRNA      | U3-L74                     | 2.45  | -0.01 | 0.58 | 0.91 |
| tRNA       | chr17.tRNA31-AsnGTT        | 2.61  | 0.01  | 0.58 | 0.91 |
| rRNA       | LSU-rRNA_Hsa-L198          | 7.74  | 0.00  | 0.58 | 0.91 |
| tRNA       | chr16.tRNA22-MetCAT        | 3.03  | 0.01  | 0.58 | 0.91 |
| scRNA      | BC200-L49                  | 4.36  | 0.00  | 0.58 | 0.91 |
| snoRNA     | SNORD127                   | 4.77  | -0.01 | 0.58 | 0.91 |
| mir-3p     | hsa-miR-130b-3p            | 2.46  | 0.00  | 0.59 | 0.91 |
| mir-5p3pnc | hsa-miR-1976               | 1.89  | 0.01  | 0.59 | 0.91 |
| mir-3p     | hsa-miR-222-3p             | 8.33  | 0.00  | 0.59 | 0.91 |
| scRNA      | HY4-L3                     | 2.42  | 0.00  | 0.59 | 0.91 |
| rRNA       | 5S-L803                    | 7.74  | 0.00  | 0.59 | 0.91 |
| tRF3       | chr19.tRNA9-PseudoTTT-tRF3 | 1.65  | 0.01  | 0.59 | 0.91 |
| scRNA      | HY4-L149                   | 1.76  | 0.01  | 0.59 | 0.91 |
| scRNA      | HY1-L414                   | 1.30  | -0.01 | 0.59 | 0.91 |
| snRNA      | U2-L218                    | 1.63  | -0.01 | 0.59 | 0.91 |
| piRNA      | piR-34804                  | 4.98  | 0.00  | 0.59 | 0.91 |
| snoRNA     | SNORD119                   | 5.61  | -0.01 | 0.59 | 0.91 |
| snRNA      | U5-L22                     | 1.98  | -0.01 | 0.59 | 0.91 |
| snoRNA     | ACA16                      | 2.80  | 0.01  | 0.59 | 0.91 |
| snoRNA     | U100                       | 1.54  | -0.01 | 0.59 | 0.91 |
| mir-5p3pnc | hsa-miR-433                | 3.46  | 0.01  | 0.59 | 0.91 |
| scRNA      | HY1-L106                   | 1.92  | -0.01 | 0.59 | 0.91 |
| tRNA       | chr20.tRNA3-PseudoCAC      | 1.30  | -0.01 | 0.59 | 0.91 |
| tRNA       | chr14.tRNA10-IleAAT        | 1.41  | -0.01 | 0.59 | 0.91 |
| scRNA      | HY4-L39                    | 3.89  | 0.00  | 0.59 | 0.91 |
| rRNA       | 5S-L1068                   | 2.39  | 0.00  | 0.59 | 0.91 |
| snRNA      | U2-L550                    | 2.12  | 0.01  | 0.60 | 0.91 |
| rRNA       | 5S-L515                    | 2.06  | -0.01 | 0.60 | 0.91 |
| snRNA      | U3-L78                     | 4.40  | 0.01  | 0.60 | 0.91 |
| rRNA       | 5S-L78                     | 2.70  | 0.00  | 0.60 | 0.91 |
| tRNA       | chr1.tRNA60-PseudoTAA      | 3.73  | -0.01 | 0.60 | 0.91 |
| tRF5       | chr17.tRNA21-ArgCCT-tRF5   | 1.46  | -0.01 | 0.60 | 0.91 |
| tRNA       | chr6.tRNA131-GlnCTG        | 1.62  | 0.01  | 0.60 | 0.91 |
| mir-3p     | hsa-miR-340-3p             | 4.29  | -0.01 | 0.60 | 0.91 |
| tRNA       | chr18.tRNA4-LysCTT         | 6.31  | 0.00  | 0.60 | 0.91 |
| rRNA       | LSU-rRNA_Hsa-L367          | 7.90  | 0.00  | 0.60 | 0.91 |
| rRNA       | LSU-rRNA_Hsa-L193          | 7.16  | 0.00  | 0.60 | 0.91 |
| scRNA      | HY4-L130                   | 14.43 | 0.00  | 0.60 | 0.91 |
| scRNA      | BC200-L164                 | 2.30  | 0.01  | 0.60 | 0.91 |
| tRF5       | chr6.tRNA114-ArgCCG-tRF5   | 1.61  | -0.01 | 0.60 | 0.91 |
| tRF5       | chrX.tRNA1-PseudoTTG-tRF5  | 2.77  | -0.01 | 0.60 | 0.91 |

|            |                             |       |       |      |      |
|------------|-----------------------------|-------|-------|------|------|
| piRNA      | piR-31638-L3                | 7.00  | 0.00  | 0.60 | 0.91 |
| rRNA       | 5S-L986                     | 1.69  | 0.01  | 0.61 | 0.91 |
| rRNA       | SSU-rRNA_Hsa-L10            | 11.45 | 0.00  | 0.61 | 0.91 |
| mir-5p3pnc | hsa-miR-4488                | 1.35  | 0.01  | 0.61 | 0.91 |
| snoRNA     | U62B                        | 3.72  | -0.01 | 0.61 | 0.91 |
| tRNA       | chr15.tRNA2-LysCTT          | 6.59  | 0.00  | 0.61 | 0.91 |
| tRF5       | chr1.tRNA104-PseudoGTT-tRF5 | 2.69  | 0.01  | 0.61 | 0.91 |
| mir-5p3pnc | hsa-miR-378e                | 1.49  | -0.01 | 0.61 | 0.91 |
| snoRNA     | U97                         | 1.93  | 0.01  | 0.61 | 0.91 |
| mir-5p     | hsa-miR-411-5p              | 2.70  | -0.01 | 0.61 | 0.91 |
| piRNA      | piR-33082-L2                | 1.79  | 0.01  | 0.61 | 0.91 |
| mir-5p     | hsa-miR-3184-5p             | 7.99  | 0.00  | 0.61 | 0.91 |
| tRF5       | chr20.tRNA7-PseudoCTC-tRF5  | 1.39  | 0.01  | 0.61 | 0.91 |
| scRNA      | HY1-L69                     | 4.11  | 0.00  | 0.61 | 0.91 |
| mir-5p3pnc | hsa-miR-378c                | 5.35  | 0.00  | 0.61 | 0.91 |
| mir-5p     | hsa-miR-432-5p              | 5.13  | -0.01 | 0.61 | 0.91 |
| scRNA      | BC200-L68                   | 2.33  | 0.01  | 0.62 | 0.91 |
| scRNA      | BC200-L7                    | 2.61  | 0.01  | 0.62 | 0.91 |
| snoRNA     | U56                         | 2.63  | 0.01  | 0.62 | 0.91 |
| rRNA       | 5S-L106                     | 12.29 | 0.00  | 0.62 | 0.91 |
| scRNA      | HY4-L68                     | 4.03  | 0.00  | 0.62 | 0.91 |
| scRNA      | HY1-L389                    | 2.66  | 0.00  | 0.62 | 0.92 |
| snoRNA     | U74                         | 5.78  | -0.01 | 0.62 | 0.92 |
| rRNA       | LSU-rRNA_Hsa-L333           | 4.08  | 0.00  | 0.62 | 0.92 |
| scRNA      | HY3-L142                    | 1.70  | -0.01 | 0.62 | 0.92 |
| snoRNA     | U80                         | 3.36  | -0.01 | 0.62 | 0.92 |
| snoRNA     | U18A                        | 6.81  | 0.01  | 0.62 | 0.92 |
| snoRNA     | ACA11                       | 2.12  | -0.01 | 0.62 | 0.92 |
| snoRNA     | mgh18S-121                  | 1.93  | 0.01  | 0.63 | 0.92 |
| scRNA      | BC200-L134                  | 1.43  | 0.01  | 0.63 | 0.92 |
| snRNA      | U5-L76                      | 2.56  | -0.01 | 0.63 | 0.92 |
| piRNA      | piR-35952-L5                | 2.44  | -0.01 | 0.63 | 0.92 |
| tRNA       | chr6.tRNA166-AlaAGC         | 1.77  | -0.01 | 0.63 | 0.92 |
| scRNA      | HY4-L36                     | 2.19  | -0.01 | 0.63 | 0.92 |
| snoRNA     | HBII-180A                   | 2.03  | -0.01 | 0.63 | 0.92 |
| mir-5p3pnc | hsa-miR-3168                | 2.09  | 0.01  | 0.63 | 0.92 |
| snoRNA     | U13-L162                    | 2.03  | 0.01  | 0.63 | 0.92 |
| mir-5p     | hsa-miR-194-5p              | 4.47  | 0.00  | 0.63 | 0.92 |
| snoRNA     | U82                         | 5.05  | 0.01  | 0.63 | 0.92 |
| mir-3p     | hsa-miR-423-3p              | 8.89  | 0.00  | 0.63 | 0.92 |
| mir-5p     | hsa-miR-423-5p              | 3.96  | 0.00  | 0.64 | 0.92 |
| mir-3p     | hsa-miR-501-3p              | 4.83  | 0.00  | 0.64 | 0.92 |
| scRNA      | HY3-L196                    | 1.85  | 0.00  | 0.64 | 0.92 |

|            |                            |       |       |      |      |
|------------|----------------------------|-------|-------|------|------|
| scRNA      | BC200-L32                  | 2.06  | -0.01 | 0.64 | 0.92 |
| snoRNA     | U83B                       | 2.68  | 0.01  | 0.64 | 0.92 |
| mir-3p     | hsa-miR-363-3p             | 7.85  | 0.00  | 0.64 | 0.92 |
| scRNA      | HY3-L382                   | 1.28  | -0.01 | 0.64 | 0.92 |
| mir-5p     | hsa-miR-450a-5p            | 3.31  | -0.01 | 0.64 | 0.92 |
| piRNA      | piR-37213                  | 1.60  | 0.01  | 0.64 | 0.92 |
| mir-3p     | hsa-miR-411-3p             | 1.75  | -0.01 | 0.64 | 0.92 |
| mir-5p     | hsa-miR-2115-5p            | 1.27  | -0.01 | 0.64 | 0.92 |
| tRNA       | chr3.tRNA7-CysGCA          | 1.80  | -0.01 | 0.64 | 0.92 |
| snRNA      | U2-L302                    | 4.05  | 0.00  | 0.64 | 0.92 |
| mir-3p     | hsa-let-7b-3p              | 3.86  | 0.00  | 0.64 | 0.92 |
| mir-5p3pnc | hsa-miR-618                | 2.72  | -0.01 | 0.65 | 0.92 |
| mir-5p     | hsa-miR-106b-5p            | 3.53  | 0.00  | 0.65 | 0.93 |
| snoRNA     | HBII-295                   | 3.05  | -0.01 | 0.65 | 0.93 |
| snoRNA     | U84                        | 2.10  | -0.01 | 0.65 | 0.93 |
| rRNA       | 5S-L935                    | 2.94  | -0.01 | 0.65 | 0.93 |
| piRNA      | piR-38502                  | 3.33  | -0.01 | 0.65 | 0.93 |
| snoRNA     | snR38C                     | 2.03  | 0.01  | 0.65 | 0.93 |
| scRNA      | HY1-L261                   | 1.76  | 0.01  | 0.65 | 0.93 |
| snoRNA     | ACA34                      | 4.14  | 0.00  | 0.66 | 0.93 |
| rRNA       | SSU-rRNA_Hsa-L26           | 3.24  | 0.00  | 0.66 | 0.93 |
| tRNA       | chr6.tRNA105-AlaAGC        | 1.66  | 0.01  | 0.66 | 0.93 |
| scRNA      | HY4-L16                    | 3.92  | 0.00  | 0.66 | 0.93 |
| mir-5p     | hsa-miR-485-5p             | 4.20  | 0.00  | 0.66 | 0.93 |
| snoRNA     | U25                        | 5.20  | 0.01  | 0.66 | 0.93 |
| rRNA       | LSU-rRNA_Hsa-L159          | 2.57  | 0.00  | 0.66 | 0.93 |
| scRNA      | HY1-L155                   | 2.69  | 0.00  | 0.66 | 0.93 |
| piRNA      | piR-49144                  | 7.05  | 0.00  | 0.66 | 0.93 |
| mir-5p3pnc | hsa-miR-4473               | 1.40  | 0.00  | 0.66 | 0.93 |
| mir-5p     | hsa-miR-3613-5p            | 4.64  | 0.00  | 0.66 | 0.93 |
| snoRNA     | U60                        | 4.21  | 0.00  | 0.66 | 0.93 |
| scRNA      | HY1-L374                   | 8.15  | 0.00  | 0.67 | 0.94 |
| rRNA       | LSU-rRNA_Hsa-L140          | 4.43  | 0.00  | 0.67 | 0.94 |
| rRNA       | 5S-L1009                   | 2.50  | 0.01  | 0.67 | 0.94 |
| piRNA      | piR-52041                  | 1.91  | -0.01 | 0.67 | 0.94 |
| mir-5p     | hsa-miR-550a-3-5p          | 1.55  | -0.01 | 0.67 | 0.94 |
| mir-3p     | hsa-miR-22-3p              | 10.18 | 0.00  | 0.68 | 0.94 |
| tRNA       | chr6.tRNA74-LeuCAA         | 2.43  | 0.00  | 0.68 | 0.94 |
| tRF3       | chr7.tRNA26-PseudoTTG-tRF3 | 2.24  | -0.01 | 0.68 | 0.94 |
| piRNA      | piR-53129                  | 1.55  | -0.01 | 0.68 | 0.94 |
| snoRNA     | U57                        | 4.69  | 0.00  | 0.68 | 0.94 |
| tRF5       | chr6.tRNA130-GlnTTG-tRF5   | 1.89  | 0.00  | 0.68 | 0.94 |
| scRNA      | HY4-L162                   | 1.65  | 0.00  | 0.68 | 0.94 |

|            |                            |       |       |      |      |
|------------|----------------------------|-------|-------|------|------|
| scRNA      | HY1-L356                   | 4.04  | 0.00  | 0.68 | 0.94 |
| tRNA       | chr1.tRNA18-PseudoCCT      | 1.66  | 0.01  | 0.68 | 0.94 |
| piRNA      | piR-44984-L3               | 2.62  | 0.00  | 0.68 | 0.94 |
| mir-5p3pnc | hsa-miR-3928               | 1.51  | -0.01 | 0.68 | 0.94 |
| mir-3p     | hsa-miR-27a-3p             | 10.82 | 0.00  | 0.68 | 0.94 |
| tRF3       | chr15.tRNA6-PseudoCTT-tRF3 | 2.01  | -0.01 | 0.68 | 0.94 |
| tRF3       | chr1.tRNA55-LysTTT-tRF3    | 2.49  | 0.01  | 0.69 | 0.94 |
| scRNA      | BC200-L135                 | 2.24  | -0.01 | 0.69 | 0.94 |
| rRNA       | 5S-L102                    | 7.36  | 0.00  | 0.69 | 0.94 |
| rRNA       | 5S-L363                    | 1.50  | -0.01 | 0.69 | 0.94 |
| scRNA      | HY4-L103                   | 4.44  | 0.00  | 0.69 | 0.94 |
| mir-5p     | hsa-miR-10b-5p             | 10.26 | 0.00  | 0.69 | 0.94 |
| tRF5       | chr11.tRNA16-ValTAC-tRF5   | 1.57  | 0.01  | 0.69 | 0.94 |
| snoRNA     | U59B                       | 7.06  | 0.00  | 0.69 | 0.94 |
| rRNA       | LSU-rRNA_Hsa-L48           | 1.64  | 0.01  | 0.69 | 0.94 |
| mir-5p     | hsa-miR-660-5p             | 3.50  | 0.00  | 0.69 | 0.94 |
| scRNA      | BC200-L156                 | 2.60  | 0.00  | 0.69 | 0.94 |
| scRNA      | BC200-L161                 | 1.53  | -0.01 | 0.69 | 0.94 |
| mir-3p     | hsa-let-7a-3p-L2           | 3.02  | 0.00  | 0.69 | 0.94 |
| snoRNA     | mgh28S-2411                | 6.56  | 0.00  | 0.69 | 0.94 |
| mir-3p     | hsa-miR-19b-3p             | 4.04  | 0.00  | 0.69 | 0.94 |
| tRNA       | chr12.tRNA6-TrpCCA         | 2.86  | 0.00  | 0.69 | 0.94 |
| mir-3p     | hsa-miR-323b-3p            | 3.62  | 0.00  | 0.69 | 0.94 |
| rRNA       | LSU-rRNA_Hsa-L308          | 1.76  | -0.01 | 0.69 | 0.94 |
| rRNA       | 5S-L946                    | 9.07  | 0.00  | 0.69 | 0.94 |
| scRNA      | HY1-L279                   | 4.02  | 0.00  | 0.69 | 0.94 |
| tRNA       | chr11.tRNA16-ValTAC        | 4.20  | 0.00  | 0.69 | 0.94 |
| scRNA      | HY1-L26                    | 2.97  | 0.00  | 0.69 | 0.94 |
| mir-5p     | hsa-miR-24-2-5p            | 4.12  | 0.00  | 0.69 | 0.94 |
| snoRNA     | HBII-289                   | 7.18  | 0.00  | 0.70 | 0.94 |
| tRNA       | chr16.tRNA34-GlyCCC        | 4.00  | 0.00  | 0.70 | 0.94 |
| snRNA      | U3-L75                     | 3.12  | -0.01 | 0.70 | 0.94 |
| tRNA       | chr16.tRNA19-GlyGCC        | 1.88  | 0.01  | 0.70 | 0.94 |
| snoRNA     | U22                        | 3.81  | 0.01  | 0.70 | 0.94 |
| rRNA       | LSU-rRNA_Hsa-L346          | 1.67  | 0.00  | 0.70 | 0.94 |
| mir-3p     | hsa-miR-92b-3p             | 4.74  | 0.00  | 0.70 | 0.94 |
| snoRNA     | U106                       | 1.86  | 0.01  | 0.70 | 0.94 |
| scRNA      | BC200-L73                  | 2.27  | 0.01  | 0.70 | 0.94 |
| mir-3p     | hsa-miR-200c-3p            | 2.75  | 0.00  | 0.70 | 0.94 |
| mir-3p     | hsa-miR-10a-3p             | 1.82  | 0.00  | 0.70 | 0.94 |
| tRF3       | chr10.tRNA2-SerTGA-tRF3    | 2.00  | 0.01  | 0.70 | 0.94 |
| scRNA      | HY1-L393                   | 1.73  | 0.00  | 0.70 | 0.94 |
| rRNA       | LSU-rRNA_Hsa-L34           | 1.35  | -0.01 | 0.71 | 0.94 |

|            |                            |      |       |      |      |
|------------|----------------------------|------|-------|------|------|
| scRNA      | BC200-L114                 | 2.21 | 0.00  | 0.71 | 0.94 |
| piRNA      | piR-51810-L2               | 8.21 | 0.00  | 0.71 | 0.94 |
| scRNA      | HY1-L227                   | 1.30 | -0.01 | 0.71 | 0.94 |
| mir-5p     | hsa-let-7d-5p              | 8.11 | 0.00  | 0.71 | 0.94 |
| tRF5       | chr18.tRNA3-PseudoTCC-tRF5 | 1.35 | 0.01  | 0.71 | 0.94 |
| mir-3p     | hsa-miR-2115-3p            | 1.61 | 0.01  | 0.71 | 0.94 |
| snoRNA     | U94                        | 3.12 | 0.00  | 0.71 | 0.94 |
| tRNA       | chr6.tRNA73-ArgCCG         | 2.37 | 0.00  | 0.71 | 0.94 |
| snoRNA     | E2                         | 2.14 | 0.00  | 0.71 | 0.94 |
| scRNA      | HY4-L18                    | 1.43 | 0.00  | 0.71 | 0.94 |
| mir-5p3pnc | hsa-miR-598                | 1.77 | -0.01 | 0.71 | 0.94 |
| snoRNA     | U92                        | 2.16 | 0.00  | 0.72 | 0.94 |
| scRNA      | HY3-L62                    | 1.84 | -0.01 | 0.72 | 0.94 |
| rRNA       | 5S-L247                    | 1.54 | 0.00  | 0.72 | 0.94 |
| piRNA      | piR-62011                  | 8.25 | 0.00  | 0.72 | 0.94 |
| scRNA      | BC200-L95                  | 3.20 | 0.00  | 0.72 | 0.94 |
| tRF5       | chr6.tRNA129-MetCAT-tRF5   | 2.00 | 0.00  | 0.72 | 0.94 |
| scRNA      | HY1-L226                   | 3.29 | 0.00  | 0.72 | 0.94 |
| snoRNA     | ACA9                       | 1.70 | 0.01  | 0.72 | 0.94 |
| piRNA      | piR-36741-L2               | 1.62 | 0.00  | 0.72 | 0.94 |
| scRNA      | HY3-L199                   | 1.72 | 0.00  | 0.72 | 0.94 |
| scRNA      | HY3-L497                   | 2.14 | 0.00  | 0.72 | 0.94 |
| rRNA       | LSU-rRNA_Hsa-L355          | 3.31 | 0.00  | 0.72 | 0.94 |
| tRNA       | chr6.tRNA175-SerGCT        | 2.06 | -0.01 | 0.72 | 0.94 |
| mir-5p     | hsa-miR-877-5p             | 2.35 | 0.00  | 0.73 | 0.94 |
| mir-5p3pnc | hsa-miR-1468               | 2.31 | -0.01 | 0.73 | 0.94 |
| mir-5p     | hsa-miR-342-5p             | 6.55 | 0.00  | 0.73 | 0.94 |
| snoRNA     | ACA53                      | 3.01 | 0.00  | 0.73 | 0.94 |
| scRNA      | HY4-L41                    | 1.86 | 0.00  | 0.73 | 0.94 |
| snoRNA     | U48                        | 5.72 | 0.00  | 0.73 | 0.94 |
| scRNA      | BC200-L138                 | 4.89 | 0.00  | 0.73 | 0.94 |
| snoRNA     | HBII-13                    | 3.91 | 0.01  | 0.73 | 0.94 |
| rRNA       | LSU-rRNA_Hsa-L166          | 5.43 | -0.01 | 0.73 | 0.94 |
| mir-5p3pnc | hsa-miR-4485               | 4.29 | 0.00  | 0.73 | 0.94 |
| rRNA       | LSU-rRNA_Hsa-L345          | 2.84 | 0.00  | 0.73 | 0.94 |
| snoRNA     | U49B                       | 1.62 | -0.01 | 0.73 | 0.94 |
| scRNA      | HY3-L432                   | 1.48 | 0.00  | 0.73 | 0.94 |
| scRNA      | BC200-L128                 | 2.65 | 0.00  | 0.73 | 0.94 |
| snRNA      | U2-L1001                   | 2.25 | 0.00  | 0.73 | 0.94 |
| scRNA      | BC200-L67                  | 4.19 | 0.00  | 0.73 | 0.95 |
| snoRNA     | ACA20                      | 2.31 | 0.01  | 0.74 | 0.95 |
| snRNA      | U3-L79                     | 3.27 | 0.00  | 0.74 | 0.95 |
| mir-3p     | hsa-miR-374c-3p            | 2.90 | 0.00  | 0.74 | 0.95 |

|            |                    |       |       |      |      |
|------------|--------------------|-------|-------|------|------|
| rRNA       | 5S-L356            | 5.32  | 0.00  | 0.74 | 0.95 |
| scRNA      | HY1-L137           | 4.44  | 0.00  | 0.74 | 0.95 |
| scRNA      | HY1-L149           | 3.78  | 0.00  | 0.74 | 0.95 |
| mir-5p     | hsa-miR-125b-5p-L2 | 3.27  | 0.00  | 0.74 | 0.95 |
| mir-5p3pnc | hsa-miR-133a       | 1.55  | 0.01  | 0.74 | 0.95 |
| mir-3p     | hsa-miR-3591-3p    | 12.23 | 0.00  | 0.74 | 0.95 |
| scRNA      | HY4-L142           | 3.10  | 0.00  | 0.74 | 0.95 |
| mir-3p     | hsa-miR-2355-3p    | 1.86  | 0.00  | 0.74 | 0.95 |
| scRNA      | HY1-L78            | 1.39  | -0.01 | 0.74 | 0.95 |
| scRNA      | HY1-L133           | 2.77  | 0.00  | 0.74 | 0.95 |
| mir-5p     | hsa-miR-550a-5p-L2 | 3.39  | 0.00  | 0.74 | 0.95 |
| scRNA      | HY1-L342           | 1.37  | 0.00  | 0.75 | 0.95 |
| tRNA       | chr2.tRNA2-TyrGTA  | 1.69  | 0.00  | 0.75 | 0.95 |
| piRNA      | piR-44984-L6       | 2.42  | 0.00  | 0.75 | 0.95 |
| scRNA      | HY1-L276           | 3.15  | 0.00  | 0.75 | 0.95 |
| rRNA       | 5S-L71             | 1.74  | 0.00  | 0.75 | 0.95 |
| snoRNA     | ACA8               | 2.21  | -0.01 | 0.75 | 0.95 |
| snoRNA     | HBII-316           | 2.03  | -0.01 | 0.75 | 0.95 |
| rRNA       | 5S-L790            | 4.09  | 0.00  | 0.75 | 0.95 |
| mir-3p     | hsa-let-7i-3p      | 1.50  | 0.00  | 0.75 | 0.95 |
| snoRNA     | HBII-82B           | 2.38  | -0.01 | 0.75 | 0.95 |
| mir-5p     | hsa-miR-15a-5p     | 3.78  | 0.00  | 0.76 | 0.95 |
| mir-5p     | hsa-miR-450b-5p    | 5.25  | 0.00  | 0.76 | 0.95 |
| scRNA      | HY1-L260           | 4.88  | 0.00  | 0.76 | 0.95 |
| rRNA       | LSU-rRNA_Hsa-L382  | 13.70 | 0.00  | 0.76 | 0.95 |
| rRNA       | LSU-rRNA_Hsa-L365  | 1.60  | 0.00  | 0.76 | 0.95 |
| mir-5p3pnc | hsa-miR-320c       | 4.43  | 0.00  | 0.76 | 0.95 |
| scRNA      | HY3-L120           | 2.34  | 0.00  | 0.76 | 0.95 |
| mir-3p     | hsa-miR-197-3p     | 2.69  | 0.00  | 0.76 | 0.95 |
| mir-5p3pnc | hsa-miR-942        | 3.31  | 0.00  | 0.76 | 0.95 |
| rRNA       | LSU-rRNA_Hsa-L73   | 2.19  | 0.00  | 0.76 | 0.95 |
| mir-5p3pnc | hsa-miR-1180       | 4.05  | 0.00  | 0.76 | 0.95 |
| rRNA       | 5S-L1067           | 2.57  | 0.00  | 0.76 | 0.95 |
| mir-3p     | hsa-miR-30c-2-3p   | 1.38  | -0.01 | 0.76 | 0.95 |
| tRNA       | chr1.tRNA5-GluTTC  | 5.89  | 0.00  | 0.76 | 0.95 |
| scRNA      | HY1-L263           | 2.72  | 0.00  | 0.76 | 0.95 |
| snRNA      | U6-L1696           | 1.91  | 0.00  | 0.76 | 0.95 |
| scRNA      | HY4-L72            | 7.28  | 0.00  | 0.76 | 0.95 |
| rRNA       | 5S-L1129           | 1.90  | 0.00  | 0.77 | 0.95 |
| mir-5p     | hsa-miR-3679-5p    | 2.94  | 0.00  | 0.77 | 0.95 |
| mir-5p3pnc | hsa-miR-320a       | 11.48 | 0.00  | 0.77 | 0.95 |
| scRNA      | BC200-L28          | 2.06  | 0.00  | 0.77 | 0.95 |
| piRNA      | piR-33151-L12      | 2.94  | 0.00  | 0.77 | 0.95 |

|            |                             |       |       |      |      |
|------------|-----------------------------|-------|-------|------|------|
| mir-5p     | hsa-miR-140-5p              | 4.20  | 0.00  | 0.77 | 0.95 |
| rRNA       | LSU-rRNA_Hsa-L403           | 9.95  | 0.00  | 0.77 | 0.95 |
| tRNA       | chr1.tRNA85-ValCAC          | 3.44  | 0.00  | 0.77 | 0.95 |
| mir-3p     | hsa-miR-495-3p              | 2.88  | 0.00  | 0.77 | 0.95 |
| piRNA      | piR-39361                   | 2.73  | 0.00  | 0.77 | 0.95 |
| rRNA       | 5S-L194                     | 2.89  | 0.00  | 0.77 | 0.95 |
| mir-5p     | hsa-miR-100-5p              | 6.59  | 0.00  | 0.77 | 0.95 |
| mir-5p     | hsa-miR-129-5p-L2           | 1.82  | 0.00  | 0.77 | 0.95 |
| snoRNA     | U59A                        | 6.70  | 0.00  | 0.77 | 0.95 |
| snoRNA     | U38A                        | 4.23  | 0.00  | 0.77 | 0.95 |
| mir-5p3pnc | hsa-miR-107                 | 1.72  | 0.00  | 0.77 | 0.95 |
| snoRNA     | U47                         | 3.87  | 0.00  | 0.77 | 0.95 |
| piRNA      | piR-34041                   | 4.17  | 0.01  | 0.78 | 0.95 |
| mir-5p     | hsa-miR-369-5p              | 1.73  | -0.01 | 0.78 | 0.95 |
| scRNA      | BC200-L88                   | 1.65  | 0.00  | 0.78 | 0.95 |
| scRNA      | HY1-L10                     | 1.55  | 0.00  | 0.78 | 0.95 |
| scRNA      | HY3-L524                    | 1.56  | 0.00  | 0.78 | 0.95 |
| tRF5       | chr1.tRNA125-PseudoGTT-tRF5 | 1.49  | 0.00  | 0.78 | 0.95 |
| snoRNA     | U32A                        | 4.08  | 0.00  | 0.78 | 0.95 |
| snoRNA     | HBII-234                    | 2.39  | 0.00  | 0.78 | 0.95 |
| scRNA      | BC200-L166                  | 2.95  | 0.00  | 0.78 | 0.95 |
| tRNA       | chr1.tRNA38-LeuCAG          | 3.68  | 0.00  | 0.78 | 0.95 |
| tRNA       | chr8.tRNA5-TyrGTA           | 1.91  | 0.00  | 0.79 | 0.96 |
| scRNA      | HY4-L99                     | 1.47  | 0.00  | 0.79 | 0.96 |
| snRNA      | U7-L52                      | 6.85  | 0.00  | 0.79 | 0.96 |
| mir-5p     | hsa-miR-142-5p              | 5.73  | 0.00  | 0.79 | 0.96 |
| mir-3p     | hsa-miR-424-3p              | 4.70  | 0.00  | 0.79 | 0.96 |
| mir-3p     | hsa-miR-26b-3p              | 2.34  | 0.00  | 0.79 | 0.96 |
| snRNA      | U1-L38                      | 1.64  | 0.00  | 0.79 | 0.96 |
| snoRNA     | U101                        | 5.22  | 0.00  | 0.79 | 0.96 |
| scRNA      | HY1-L434                    | 6.45  | 0.00  | 0.79 | 0.96 |
| mir-5p     | hsa-miR-183-5p              | 7.53  | 0.00  | 0.79 | 0.96 |
| tRF3       | chr17.tRNA33-PseudoTTG-tRF3 | 4.41  | 0.00  | 0.79 | 0.96 |
| piRNA      | piR-49145                   | 2.41  | 0.00  | 0.79 | 0.96 |
| rRNA       | LSU-rRNA_Hsa-L283           | 2.11  | 0.00  | 0.79 | 0.96 |
| rRNA       | SSU-rRNA_Hsa-L74            | 6.51  | 0.00  | 0.79 | 0.96 |
| mir-5p     | hsa-let-7b-5p               | 12.45 | 0.00  | 0.80 | 0.96 |
| piRNA      | piR-33151-L9                | 3.44  | 0.00  | 0.80 | 0.96 |
| mir-5p     | hsa-miR-30b-5p              | 2.47  | 0.00  | 0.80 | 0.96 |
| rRNA       | LSU-rRNA_Hsa-L257           | 4.58  | 0.00  | 0.80 | 0.96 |
| tRNA       | chr6.tRNA75-MetCAT          | 1.36  | 0.00  | 0.80 | 0.96 |
| scRNA      | HY1-L223                    | 6.19  | 0.00  | 0.80 | 0.96 |
| snoRNA     | U45A                        | 4.15  | 0.00  | 0.80 | 0.96 |



|            |                         |       |       |      |      |
|------------|-------------------------|-------|-------|------|------|
| tRNA       | chr16.tRNA10-LysCTT     | 4.96  | 0.00  | 0.80 | 0.96 |
| mir-5p     | hsa-miR-4732-5p         | 3.27  | 0.00  | 0.80 | 0.96 |
| tRF3       | chr6.tRNA61-MetCAT-tRF3 | 2.22  | -0.01 | 0.80 | 0.96 |
| scRNA      | HY1-L25                 | 1.88  | 0.00  | 0.80 | 0.96 |
| tRNA       | chr19.tRNA2-GlyTCC      | 4.14  | 0.00  | 0.81 | 0.96 |
| scRNA      | HY4-L21                 | 2.22  | 0.00  | 0.81 | 0.96 |
| mir-5p3pnc | hsa-miR-320b            | 4.99  | 0.00  | 0.81 | 0.96 |
| tRNA       | chr1.tRNA9-ArgTCT       | 2.50  | 0.00  | 0.81 | 0.96 |
| mir-5p     | hsa-miR-548ay-5p        | 2.18  | 0.00  | 0.81 | 0.96 |
| tRF5       | chr6.tRNA56-PheGAA-tRF5 | 1.38  | 0.00  | 0.81 | 0.96 |
| mir-3p     | hsa-miR-23a-3p          | 6.59  | 0.00  | 0.81 | 0.96 |
| rRNA       | LSU-rRNA_Hsa-L144       | 1.61  | 0.00  | 0.81 | 0.96 |
| mir-5p     | hsa-miR-424-5p          | 2.86  | 0.00  | 0.81 | 0.96 |
| snoRNA     | HBII-82                 | 2.14  | -0.01 | 0.81 | 0.96 |
| snRNA      | U6-L440                 | 1.97  | 0.00  | 0.81 | 0.96 |
| piRNA      | piR-33404               | 6.30  | 0.00  | 0.81 | 0.96 |
| mir-3p     | hsa-miR-145-3p          | 4.84  | 0.00  | 0.81 | 0.96 |
| mir-5p3pnc | hsa-miR-206             | 2.36  | 0.00  | 0.81 | 0.96 |
| mir-5p     | hsa-miR-20b-5p          | 3.49  | 0.00  | 0.81 | 0.96 |
| scRNA      | HY1-L190                | 2.42  | 0.00  | 0.82 | 0.96 |
| scRNA      | HY4-L77                 | 2.15  | 0.00  | 0.82 | 0.96 |
| snRNA      | U1-L33                  | 2.56  | 0.00  | 0.82 | 0.96 |
| mir-3p     | hsa-miR-3913-3p         | 1.59  | 0.00  | 0.82 | 0.96 |
| rRNA       | LSU-rRNA_Hsa-L309       | 8.19  | 0.00  | 0.82 | 0.96 |
| scRNA      | HY1-L171                | 1.68  | 0.00  | 0.82 | 0.96 |
| scRNA      | HY1-L67                 | 6.00  | 0.00  | 0.82 | 0.96 |
| snoRNA     | U42B                    | 4.22  | 0.00  | 0.82 | 0.96 |
| rRNA       | SSU-rRNA_Hsa-L3         | 1.28  | 0.00  | 0.82 | 0.96 |
| mir-3p     | hsa-miR-195-3p          | 1.91  | 0.00  | 0.82 | 0.96 |
| snoRNA     | ACA3                    | 2.48  | 0.00  | 0.82 | 0.96 |
| mir-5p3pnc | hsa-miR-4461            | 2.06  | 0.00  | 0.82 | 0.96 |
| rRNA       | 5S-L762                 | 4.86  | 0.00  | 0.82 | 0.96 |
| rRNA       | 5S-L676                 | 1.34  | 0.00  | 0.82 | 0.96 |
| mir-5p     | hsa-miR-16-5p-L2        | 8.44  | 0.00  | 0.82 | 0.96 |
| rRNA       | 5S-L558                 | 7.28  | 0.00  | 0.82 | 0.96 |
| piRNA      | piR-38600               | 3.94  | 0.00  | 0.83 | 0.96 |
| rRNA       | SSU-rRNA_Hsa-L80        | 6.73  | 0.00  | 0.83 | 0.96 |
| scRNA      | BC200-L36               | 2.68  | 0.00  | 0.83 | 0.96 |
| scRNA      | HY4-L47                 | 2.67  | 0.00  | 0.83 | 0.96 |
| rRNA       | LSU-rRNA_Hsa-L109       | 1.47  | 0.00  | 0.83 | 0.96 |
| rRNA       | LSU-rRNA_Hsa-L39        | 7.57  | 0.00  | 0.83 | 0.96 |
| rRNA       | 5S-L113                 | 10.34 | 0.00  | 0.83 | 0.96 |
| mir-5p3pnc | hsa-miR-134             | 6.74  | 0.00  | 0.83 | 0.96 |

|            |                          |       |      |      |      |
|------------|--------------------------|-------|------|------|------|
| snoRNA     | U55                      | 5.84  | 0.00 | 0.83 | 0.96 |
| mir-3p     | hsa-miR-1285-3p          | 3.54  | 0.00 | 0.84 | 0.97 |
| mir-5p     | hsa-miR-4746-5p          | 1.73  | 0.00 | 0.84 | 0.97 |
| tRF3       | chr12.tRNA7-AspGTC-tRF3  | 1.65  | 0.00 | 0.84 | 0.97 |
| mir-3p     | hsa-miR-10b-3p           | 1.70  | 0.00 | 0.84 | 0.97 |
| mir-5p3pnc | hsa-miR-451a             | 12.70 | 0.00 | 0.84 | 0.97 |
| rRNA       | 5S-L957                  | 1.43  | 0.00 | 0.84 | 0.97 |
| scRNA      | HY1-L57                  | 2.78  | 0.00 | 0.84 | 0.97 |
| scRNA      | HY1-L111                 | 1.94  | 0.00 | 0.85 | 0.97 |
| scRNA      | HY4-L11                  | 1.48  | 0.00 | 0.85 | 0.97 |
| mir-5p     | hsa-miR-3173-5p          | 2.41  | 0.00 | 0.85 | 0.97 |
| tRNA       | chr16.tRNA13-PseudoCTT   | 4.70  | 0.00 | 0.85 | 0.97 |
| scRNA      | HY1-L178                 | 4.26  | 0.00 | 0.85 | 0.97 |
| snoRNA     | U15A                     | 2.09  | 0.00 | 0.85 | 0.97 |
| snoRNA     | ACA18                    | 2.07  | 0.00 | 0.85 | 0.97 |
| rRNA       | LSU-rRNA_Hsa-L178        | 3.24  | 0.00 | 0.85 | 0.97 |
| piRNA      | piR-36707                | 5.03  | 0.00 | 0.85 | 0.97 |
| rRNA       | 5S-L104                  | 10.61 | 0.00 | 0.85 | 0.97 |
| mir-3p     | hsa-miR-16-2-3p          | 7.97  | 0.00 | 0.85 | 0.97 |
| piRNA      | piR-61174                | 1.23  | 0.00 | 0.85 | 0.97 |
| mir-3p     | hsa-miR-3187-3p          | 1.63  | 0.00 | 0.85 | 0.97 |
| mir-5p     | hsa-miR-505-5p           | 1.81  | 0.00 | 0.85 | 0.97 |
| rRNA       | 5S-L804                  | 4.97  | 0.00 | 0.85 | 0.97 |
| snoRNA     | ACA54                    | 1.60  | 0.00 | 0.85 | 0.97 |
| mir-3p     | hsa-miR-1185-1-3p        | 2.25  | 0.00 | 0.85 | 0.97 |
| snoRNA     | U85                      | 3.06  | 0.00 | 0.85 | 0.97 |
| snoRNA     | U18C                     | 1.82  | 0.00 | 0.86 | 0.97 |
| piRNA      | piR-52416-L2             | 2.28  | 0.00 | 0.86 | 0.97 |
| snoRNA     | U63                      | 5.92  | 0.00 | 0.86 | 0.97 |
| snoRNA     | ACA3-2                   | 2.59  | 0.00 | 0.86 | 0.97 |
| scRNA      | HY1-L100                 | 8.91  | 0.00 | 0.86 | 0.97 |
| rRNA       | LSU-rRNA_Hsa-L360        | 1.84  | 0.00 | 0.86 | 0.97 |
| mir-5p     | hsa-miR-766-5p           | 1.81  | 0.00 | 0.86 | 0.97 |
| piRNA      | piR-34536                | 5.56  | 0.00 | 0.86 | 0.97 |
| mir-5p     | hsa-miR-30c-5p           | 6.46  | 0.00 | 0.86 | 0.97 |
| rRNA       | 5S-L1270                 | 1.27  | 0.00 | 0.86 | 0.97 |
| scRNA      | HY1-L391                 | 14.88 | 0.00 | 0.86 | 0.97 |
| rRNA       | 5S-L111                  | 10.31 | 0.00 | 0.87 | 0.97 |
| snoRNA     | U104                     | 7.46  | 0.00 | 0.87 | 0.97 |
| tRF5       | chr17.tRNA31-AsnGTT-tRF5 | 2.92  | 0.00 | 0.87 | 0.97 |
| snoRNA     | U42A                     | 4.44  | 0.00 | 0.87 | 0.97 |
| rRNA       | 5S-L253                  | 3.20  | 0.00 | 0.87 | 0.97 |
| scRNA      | HY4-L132                 | 2.50  | 0.00 | 0.87 | 0.97 |

|            |                            |       |      |      |      |
|------------|----------------------------|-------|------|------|------|
| mir-5p     | hsa-miR-125a-5p            | 4.98  | 0.00 | 0.87 | 0.97 |
| tRNA       | chr16.tRNA25-GlyGCC        | 4.78  | 0.00 | 0.88 | 0.97 |
| scRNA      | HY1-L179                   | 6.39  | 0.00 | 0.88 | 0.97 |
| scRNA      | HY1-L239                   | 4.37  | 0.00 | 0.88 | 0.97 |
| piRNA      | piR-41209-L2               | 3.73  | 0.00 | 0.88 | 0.97 |
| scRNA      | HY1-L184                   | 3.77  | 0.00 | 0.88 | 0.97 |
| tRF3       | chr20.tRNA4-PseudoTAA-tRF3 | 4.75  | 0.00 | 0.88 | 0.97 |
| mir-5p     | hsa-miR-3074-5p            | 9.31  | 0.00 | 0.88 | 0.97 |
| tRNA       | chr16.tRNA31-PseudoTGG     | 3.01  | 0.00 | 0.88 | 0.97 |
| snRNA      | U1-L7                      | 6.15  | 0.00 | 0.88 | 0.97 |
| scRNA      | HY3-L140                   | 2.65  | 0.00 | 0.88 | 0.97 |
| mir-5p3pnc | hsa-miR-1284               | 1.70  | 0.00 | 0.88 | 0.97 |
| snRNA      | U2-L63                     | 2.16  | 0.00 | 0.88 | 0.97 |
| tRNA       | chr6.tRNA31-SerGCT         | 3.19  | 0.00 | 0.88 | 0.97 |
| tRF3       | chr14.tRNA14-GluTTC-tRF3   | 2.02  | 0.00 | 0.88 | 0.97 |
| rRNA       | LSU-rRNA_Hsa-L341          | 1.93  | 0.00 | 0.88 | 0.97 |
| mir-3p     | hsa-miR-181c-3p            | 1.57  | 0.00 | 0.88 | 0.97 |
| scRNA      | HY4-L147                   | 9.21  | 0.00 | 0.88 | 0.97 |
| snoRNA     | mgh28S-2409                | 3.15  | 0.00 | 0.89 | 0.97 |
| mir-5p3pnc | hsa-miR-210                | 2.15  | 0.00 | 0.89 | 0.97 |
| rRNA       | LSU-rRNA_Hsa-L13           | 12.04 | 0.00 | 0.89 | 0.97 |
| rRNA       | LSU-rRNA_Hsa-L300          | 7.63  | 0.00 | 0.89 | 0.97 |
| snoRNA     | HBII-239                   | 4.71  | 0.00 | 0.89 | 0.97 |
| tRNA       | chr10.tRNA6-ValTAC         | 1.49  | 0.00 | 0.89 | 0.97 |
| snoRNA     | HBII-166                   | 3.05  | 0.00 | 0.89 | 0.97 |
| rRNA       | 5S-L782                    | 3.63  | 0.00 | 0.89 | 0.97 |
| mir-3p     | hsa-miR-3150b-3p           | 1.47  | 0.00 | 0.89 | 0.97 |
| rRNA       | 5S-L815                    | 2.57  | 0.00 | 0.89 | 0.97 |
| scRNA      | BC200-L11                  | 1.53  | 0.00 | 0.89 | 0.97 |
| mir-5p3pnc | hsa-miR-3672               | 1.53  | 0.00 | 0.90 | 0.97 |
| tRNA       | chr17.tRNA16-GlnTTG        | 2.36  | 0.00 | 0.90 | 0.97 |
| rRNA       | LSU-rRNA_Hsa-L236          | 1.43  | 0.00 | 0.90 | 0.97 |
| piRNA      | piR-31638                  | 1.74  | 0.00 | 0.90 | 0.97 |
| snoRNA     | U26                        | 8.56  | 0.00 | 0.90 | 0.97 |
| scRNA      | HY1-L300                   | 2.19  | 0.00 | 0.90 | 0.97 |
| tRNA       | chr14.tRNA19-TyrGTA        | 2.52  | 0.00 | 0.90 | 0.97 |
| piRNA      | piR-30890                  | 3.30  | 0.00 | 0.90 | 0.97 |
| mir-5p3pnc | hsa-miR-328                | 4.07  | 0.00 | 0.90 | 0.97 |
| mir-3p     | hsa-miR-625-3p             | 4.68  | 0.00 | 0.90 | 0.97 |
| scRNA      | HY4-L100                   | 3.24  | 0.00 | 0.90 | 0.97 |
| piRNA      | piR-30112                  | 2.68  | 0.00 | 0.90 | 0.97 |
| rRNA       | 5S-L112                    | 10.83 | 0.00 | 0.90 | 0.97 |
| mir-5p     | hsa-miR-642b-5p            | 1.56  | 0.00 | 0.90 | 0.97 |

|            |                         |       |      |      |      |
|------------|-------------------------|-------|------|------|------|
| mir-5p     | hsa-miR-193a-5p         | 5.17  | 0.00 | 0.90 | 0.97 |
| rRNA       | 5S-L297                 | 1.59  | 0.00 | 0.90 | 0.97 |
| rRNA       | 5S-L1255                | 1.70  | 0.00 | 0.90 | 0.97 |
| scRNA      | HY1-L443                | 7.16  | 0.00 | 0.90 | 0.97 |
| tRF5       | chr14.tRNA4-ThrTGT-trf5 | 2.23  | 0.00 | 0.90 | 0.97 |
| piRNA      | piR-57824               | 1.45  | 0.00 | 0.91 | 0.97 |
| tRNA       | chr6.tRNA136-ValAAC     | 2.04  | 0.00 | 0.91 | 0.97 |
| snoRNA     | U79                     | 1.72  | 0.00 | 0.91 | 0.97 |
| mir-5p3pnc | hsa-miR-889             | 2.82  | 0.00 | 0.91 | 0.97 |
| scRNA      | HY1-L3                  | 3.10  | 0.00 | 0.91 | 0.97 |
| scRNA      | HY4-L159                | 4.46  | 0.00 | 0.91 | 0.97 |
| piRNA      | piR-59299               | 1.72  | 0.00 | 0.91 | 0.97 |
| snoRNA     | U38B                    | 2.95  | 0.00 | 0.91 | 0.97 |
| mir-5p     | hsa-miR-181b-5p-L2      | 6.05  | 0.00 | 0.91 | 0.97 |
| snRNA      | U4-L24                  | 1.61  | 0.00 | 0.91 | 0.97 |
| scRNA      | HY1-L304                | 3.88  | 0.00 | 0.91 | 0.97 |
| scRNA      | HY1-L143                | 2.32  | 0.00 | 0.91 | 0.97 |
| snoRNA     | U105                    | 2.35  | 0.00 | 0.91 | 0.97 |
| snoRNA     | HBII-85-10              | 1.77  | 0.00 | 0.91 | 0.97 |
| scRNA      | HY1-L277                | 3.60  | 0.00 | 0.92 | 0.97 |
| snRNA      | U1-L24                  | 2.67  | 0.00 | 0.92 | 0.97 |
| rRNA       | LSU-rRNA_Hsa-L304       | 2.50  | 0.00 | 0.92 | 0.97 |
| scRNA      | HY1-L292                | 5.48  | 0.00 | 0.92 | 0.97 |
| mir-5p     | hsa-miR-191-5p          | 8.87  | 0.00 | 0.92 | 0.97 |
| scRNA      | HY3-L239                | 1.81  | 0.00 | 0.92 | 0.97 |
| mir-3p     | hsa-miR-4677-3p         | 1.78  | 0.00 | 0.92 | 0.97 |
| mir-5p     | hsa-miR-5010-5p         | 1.44  | 0.00 | 0.92 | 0.97 |
| mir-5p3pnc | hsa-let-7c-L2           | 5.48  | 0.00 | 0.92 | 0.97 |
| rRNA       | 5S-L108                 | 11.53 | 0.00 | 0.92 | 0.97 |
| scRNA      | HY1                     | 6.00  | 0.00 | 0.92 | 0.97 |
| scRNA      | HY1-L191                | 3.51  | 0.00 | 0.92 | 0.97 |
| rRNA       | 5S-L1070                | 1.47  | 0.00 | 0.92 | 0.97 |
| tRNA       | chr17.tRNA12-TrpCCA     | 2.18  | 0.00 | 0.92 | 0.97 |
| tRNA       | chr6.tRNA84-GlnTTG      | 1.52  | 0.00 | 0.92 | 0.97 |
| tRNA       | chr6.tRNA100-LeuCAA     | 3.49  | 0.00 | 0.92 | 0.97 |
| snoRNA     | U103B                   | 3.29  | 0.00 | 0.93 | 0.97 |
| piRNA      | piR-43325-L2            | 2.34  | 0.00 | 0.93 | 0.97 |
| mir-5p     | hsa-miR-625-5p          | 2.07  | 0.00 | 0.93 | 0.97 |
| mir-5p     | hsa-miR-32-5p           | 3.62  | 0.00 | 0.93 | 0.97 |
| scRNA      | HY1-L324                | 1.92  | 0.00 | 0.93 | 0.97 |
| rRNA       | 5S-L731                 | 1.51  | 0.00 | 0.93 | 0.97 |
| snoRNA     | U31                     | 7.96  | 0.00 | 0.93 | 0.97 |
| snoRNA     | U49A                    | 7.52  | 0.00 | 0.93 | 0.97 |

|            |                          |       |      |      |      |
|------------|--------------------------|-------|------|------|------|
| snoRNA     | U58A                     | 5.02  | 0.00 | 0.93 | 0.97 |
| tRNA       | chr17.tRNA17-SupTTA      | 2.90  | 0.00 | 0.93 | 0.97 |
| rRNA       | LSU-rRNA_Hsa-L151        | 3.13  | 0.00 | 0.93 | 0.97 |
| mir-5p     | hsa-miR-30e-5p           | 8.13  | 0.00 | 0.93 | 0.97 |
| tRF3       | chr2.tRNA21-SerTGA-tRF3  | 2.33  | 0.00 | 0.93 | 0.97 |
| snoRNA     | snR38B                   | 3.26  | 0.00 | 0.93 | 0.97 |
| mir-5p     | hsa-miR-1234-5p          | 14.77 | 0.00 | 0.93 | 0.97 |
| scRNA      | HY1-L295                 | 4.37  | 0.00 | 0.93 | 0.97 |
| mir-5p3pnc | hsa-miR-451b             | 2.85  | 0.00 | 0.93 | 0.97 |
| scRNA      | HY4-L34                  | 1.71  | 0.00 | 0.93 | 0.97 |
| mir-3p     | hsa-miR-4433-3p          | 2.78  | 0.00 | 0.93 | 0.97 |
| mir-5p     | hsa-miR-361-5p           | 3.48  | 0.00 | 0.93 | 0.97 |
| rRNA       | 5S-L97                   | 10.24 | 0.00 | 0.93 | 0.97 |
| scRNA      | HY1-L287                 | 6.16  | 0.00 | 0.93 | 0.97 |
| scRNA      | BC200-L149               | 1.76  | 0.00 | 0.93 | 0.97 |
| snRNA      | U1-L47                   | 1.98  | 0.00 | 0.94 | 0.97 |
| snRNA      | U5-L133                  | 2.24  | 0.00 | 0.94 | 0.97 |
| rRNA       | 5S-L189                  | 2.24  | 0.00 | 0.94 | 0.97 |
| mir-3p     | hsa-let-7f-2-3p          | 1.55  | 0.00 | 0.94 | 0.97 |
| scRNA      | HY1-L397                 | 3.27  | 0.00 | 0.94 | 0.98 |
| rRNA       | 5S-L397                  | 1.55  | 0.00 | 0.94 | 0.98 |
| snoRNA     | U36B                     | 1.73  | 0.00 | 0.95 | 0.98 |
| rRNA       | 5S-L191                  | 4.70  | 0.00 | 0.95 | 0.98 |
| rRNA       | 5S-L1196                 | 2.22  | 0.00 | 0.95 | 0.98 |
| snoRNA     | HBII-202                 | 6.44  | 0.00 | 0.95 | 0.98 |
| rRNA       | LSU-rRNA_Hsa-L161        | 1.84  | 0.00 | 0.95 | 0.98 |
| mir-3p     | hsa-miR-150-3p           | 2.88  | 0.00 | 0.95 | 0.98 |
| snRNA      | U5-L2                    | 6.33  | 0.00 | 0.95 | 0.98 |
| mir-5p     | hsa-let-7a-5p-L3         | 12.09 | 0.00 | 0.95 | 0.98 |
| tRF5       | chr17.tRNA26-CysGCA-tRF5 | 5.39  | 0.00 | 0.95 | 0.98 |
| scRNA      | BC200-L54                | 4.73  | 0.00 | 0.95 | 0.98 |
| tRNA       | chr5.tRNA4-ValAAC        | 2.29  | 0.00 | 0.95 | 0.98 |
| scRNA      | HY4-L50                  | 1.52  | 0.00 | 0.96 | 0.98 |
| snoRNA     | U53                      | 2.70  | 0.00 | 0.96 | 0.98 |
| scRNA      | BC200-L46                | 1.64  | 0.00 | 0.96 | 0.98 |
| mir-5p3pnc | hsa-miR-3138             | 1.71  | 0.00 | 0.96 | 0.98 |
| tRF3       | chr9.tRNA6-AspGTC-tRF3   | 1.45  | 0.00 | 0.96 | 0.98 |
| scRNA      | HY4-L151                 | 2.39  | 0.00 | 0.96 | 0.98 |
| piRNA      | piR-53659                | 2.18  | 0.00 | 0.96 | 0.98 |
| scRNA      | HY1-L243                 | 6.54  | 0.00 | 0.96 | 0.99 |
| rRNA       | SSU-rRNA_Hsa-L67         | 3.08  | 0.00 | 0.97 | 0.99 |
| tRNA       | chr16.tRNA17-LeuCAG      | 3.37  | 0.00 | 0.97 | 0.99 |
| mir-3p     | hsa-miR-144-3p           | 5.77  | 0.00 | 0.97 | 0.99 |

|            |                     |       |      |      |      |
|------------|---------------------|-------|------|------|------|
| mir-3p     | hsa-miR-136-3p      | 2.62  | 0.00 | 0.97 | 0.99 |
| tRNA       | chr1.tRNA117-GlyTCC | 2.71  | 0.00 | 0.97 | 0.99 |
| piRNA      | piR-33160           | 1.68  | 0.00 | 0.97 | 0.99 |
| mir-5p     | hsa-miR-629-5p      | 7.76  | 0.00 | 0.97 | 0.99 |
| scRNA      | BC200-L37           | 6.33  | 0.00 | 0.97 | 0.99 |
| tRNA       | chr6.tRNA153-IleAAT | 1.68  | 0.00 | 0.97 | 0.99 |
| mir-5p3pnc | hsa-miR-1287        | 1.87  | 0.00 | 0.98 | 0.99 |
| snoRNA     | HBII-99B            | 1.87  | 0.00 | 0.98 | 0.99 |
| scRNA      | BC200-L29           | 2.92  | 0.00 | 0.98 | 0.99 |
| snoRNA     | HBII-276            | 3.49  | 0.00 | 0.98 | 0.99 |
| snoRNA     | mgU6-77             | 4.50  | 0.00 | 0.98 | 0.99 |
| mir-5p     | hsa-miR-193b-5p     | 2.08  | 0.00 | 0.98 | 0.99 |
| scRNA      | HY1-L212            | 2.69  | 0.00 | 0.98 | 0.99 |
| rRNA       | LSU-rRNA_Hsa-L212   | 3.25  | 0.00 | 0.98 | 0.99 |
| rRNA       | 5S-L126             | 2.55  | 0.00 | 0.98 | 0.99 |
| piRNA      | piR-38354           | 2.15  | 0.00 | 0.99 | 1.00 |
| rRNA       | 5S-L983             | 1.77  | 0.00 | 0.99 | 1.00 |
| scRNA      | HY1-L280            | 2.44  | 0.00 | 0.99 | 1.00 |
| mir-3p     | hsa-miR-3605-3p     | 2.12  | 0.00 | 0.99 | 1.00 |
| mir-5p     | hsa-miR-1228-5p     | 2.00  | 0.00 | 0.99 | 1.00 |
| tRNA       | chr6.tRNA14-TyrGTA  | 1.90  | 0.00 | 0.99 | 1.00 |
| mir-5p     | hsa-miR-331-5p      | 1.28  | 0.00 | 0.99 | 1.00 |
| scRNA      | BC200-L38           | 1.58  | 0.00 | 0.99 | 1.00 |
| mir-5p     | hsa-miR-7-5p-L3     | 1.44  | 0.00 | 0.99 | 1.00 |
| scRNA      | HY4-L30             | 3.53  | 0.00 | 1.00 | 1.00 |
| rRNA       | 5S-L107             | 10.07 | 0.00 | 1.00 | 1.00 |
| mir-5p3pnc | hsa-miR-2110        | 5.17  | 0.00 | 1.00 | 1.00 |
| scRNA      | HY1-L45             | 1.90  | 0.00 | 1.00 | 1.00 |
| tRNA       | chr14.tRNA7-ArgACG  | 1.75  | 0.00 | 1.00 | 1.00 |

**Supplementary Table 7: RNA correlations with baseline ESR**

| <i>RNA type</i> | <i>ID</i>                | <i>Average read count (log2 CPM)</i> | <i>Correlation coefficient</i> | <i>P-value</i> | <i>Adjusted P-value</i> |
|-----------------|--------------------------|--------------------------------------|--------------------------------|----------------|-------------------------|
| rRNA            | LSU-rRNA_Hsa-L385        | 8.75                                 | 0.02                           | 4.39E-06       | 6.53E-03                |
| tRNA            | chr6.tRNA38-IleAAT       | 3.15                                 | 0.06                           | 9.50E-06       | 7.06E-03                |
| tRNA            | chr6.tRNA15-TyrGTA       | 5.52                                 | 0.03                           | 3.63E-05       | 1.62E-02                |
| tRF3            | chr6.tRNA153-IleAAT-tRF3 | 2.68                                 | 0.04                           | 4.64E-05       | 1.62E-02                |
| piRNA           | piR-31925                | 11.30                                | -0.02                          | 5.45E-05       | 1.62E-02                |
| tRNA            | chr2.tRNA17-PseudoTTC    | 7.07                                 | -0.02                          | 8.69E-05       | 2.15E-02                |
| tRNA            | chr1.tRNA96-PseudoCCT    | 8.20                                 | -0.02                          | 1.11E-04       | 2.33E-02                |
| tRNA            | chr6.tRNA77-GluCTC       | 4.25                                 | 0.02                           | 1.25E-04       | 2.33E-02                |
| tRNA            | chr14.tRNA8-CysGCA       | 4.27                                 | 0.05                           | 1.46E-04       | 2.38E-02                |
| tRNA            | chr17.tRNA13-GlyCCC      | 5.82                                 | -0.02                          | 1.60E-04       | 2.38E-02                |
| tRNA            | chr1.tRNA99-ValCAC       | 8.58                                 | -0.02                          | 2.14E-04       | 2.63E-02                |
| tRF3            | chr3.tRNA2-ValAAC-tRF3   | 4.15                                 | 0.02                           | 2.52E-04       | 2.63E-02                |
| snRNA           | U2-L1058                 | 6.70                                 | 0.02                           | 2.68E-04       | 2.63E-02                |
| piRNA           | piR-31068-L10            | 2.13                                 | -0.05                          | 2.74E-04       | 2.63E-02                |
| tRNA            | chr7.tRNA7-CysGCA        | 7.06                                 | 0.03                           | 2.77E-04       | 2.63E-02                |
| mir-3p          | hsa-miR-151a-3p          | 11.62                                | -0.02                          | 2.83E-04       | 2.63E-02                |
| scRNA           | HY4-L152                 | 7.32                                 | 0.02                           | 3.34E-04       | 2.76E-02                |
| piRNA           | piR-35982                | 15.63                                | -0.03                          | 3.44E-04       | 2.76E-02                |
| rRNA            | SSU-rRNA_Hsa-L73         | 14.22                                | 0.01                           | 3.62E-04       | 2.76E-02                |
| tRF3            | chr6.tRNA61-MetCAT-tRF3  | 2.22                                 | 0.04                           | 3.71E-04       | 2.76E-02                |
| tRNA            | chr16.tRNA24-GlyGCC      | 15.82                                | -0.02                          | 5.05E-04       | 3.37E-02                |
| piRNA           | piR-35982-L11            | 1.95                                 | -0.06                          | 5.10E-04       | 3.37E-02                |
| tRNA            | chr1.tRNA88-PseudoCCT    | 6.19                                 | -0.02                          | 5.21E-04       | 3.37E-02                |
| mir-5p          | hsa-miR-379-5p           | 5.35                                 | -0.03                          | 5.90E-04       | 3.64E-02                |
| snRNA           | U2-L1061                 | 11.07                                | 0.02                           | 6.11E-04       | 3.64E-02                |
| scRNA           | BC200-L10                | 2.65                                 | 0.02                           | 6.67E-04       | 3.82E-02                |
| tRF5            | chr17.tRNA31-AsnGTT-tRF5 | 2.92                                 | 0.03                           | 7.00E-04       | 3.85E-02                |
| mir-3p          | hsa-miR-148b-3p          | 8.62                                 | -0.01                          | 7.34E-04       | 3.85E-02                |
| mir-5p          | hsa-miR-4433-5p          | 5.15                                 | -0.03                          | 7.53E-04       | 3.85E-02                |
| piRNA           | piR-31925-L9             | 13.82                                | -0.02                          | 7.88E-04       | 3.85E-02                |
| rRNA            | LSU-rRNA_Hsa-L389        | 10.71                                | 0.02                           | 8.03E-04       | 3.85E-02                |
| tRNA            | chr1.tRNA43-GlyGCC       | 6.87                                 | -0.02                          | 8.93E-04       | 4.15E-02                |
| scRNA           | HY5-L7                   | 2.29                                 | 0.02                           | 9.48E-04       | 4.27E-02                |
| rRNA            | LSU-rRNA_Hsa-L387        | 9.35                                 | 0.01                           | 1.02E-03       | 4.38E-02                |
| snRNA           | U14-L2                   | 1.79                                 | -0.05                          | 1.05E-03       | 4.38E-02                |
| piRNA           | piR-35982-L6             | 1.98                                 | -0.05                          | 1.06E-03       | 4.38E-02                |
| tRNA            | chr12.tRNA10-AspGTC      | 4.59                                 | 0.02                           | 1.25E-03       | 4.93E-02                |
| piRNA           | piR-31935                | 4.57                                 | 0.02                           | 1.28E-03       | 4.93E-02                |
| rRNA            | LSU-rRNA_Hsa-L350        | 10.47                                | 0.01                           | 1.29E-03       | 4.93E-02                |

|          |                          |       |       |          |          |
|----------|--------------------------|-------|-------|----------|----------|
| tRF3     | chr16.tRNA28-ProTGG-tRF3 | 1.99  | 0.03  | 1.40E-03 | 5.14E-02 |
| tRNA     | chr6.tRNA82-GlyGCC       | 5.28  | -0.02 | 1.42E-03 | 5.14E-02 |
| piRNA    | piR-35284                | 8.07  | -0.02 | 1.45E-03 | 5.14E-02 |
| mir-3p   | hsa-miR-127-3p           | 5.07  | -0.03 | 1.57E-03 | 5.36E-02 |
| snRNA    | U2-L240                  | 3.38  | 0.02  | 1.58E-03 | 5.36E-02 |
| tRNA     | chr19.tRNA8-SeCTCA       | 5.87  | 0.01  | 1.80E-03 | 5.95E-02 |
| mir-3p   | hsa-miR-28-3p            | 7.13  | -0.01 | 1.84E-03 | 5.95E-02 |
| tRF3     | chr6.tRNA36-ArgACG-tRF3  | 4.47  | 0.02  | 1.95E-03 | 6.03E-02 |
| snoRNA   | HBII-251                 | 3.81  | -0.04 | 1.97E-03 | 6.03E-02 |
| scRNA    | BC200-L139               | 3.27  | 0.02  | 1.99E-03 | 6.03E-02 |
| rRNA     | LSU-rRNA_Hsa-L384        | 14.09 | 0.01  | 2.06E-03 | 6.13E-02 |
| mir-5p   | hsa-miR-493-5p           | 4.61  | -0.03 | 2.14E-03 | 6.23E-02 |
| rRNA     | SSU-rRNA_Hsa-L24         | 9.30  | 0.01  | 2.23E-03 | 6.28E-02 |
| piRNA    | piR-36444                | 2.53  | -0.03 | 2.25E-03 | 6.28E-02 |
| rRNA     | LSU-rRNA_Hsa-L93         | 7.67  | 0.01  | 2.32E-03 | 6.28E-02 |
| mir-5p   | hsa-miR-3606-5p          | 2.63  | 0.04  | 2.34E-03 | 6.28E-02 |
| rRNA     | LSU-rRNA_Hsa-L64         | 1.52  | -0.04 | 2.36E-03 | 6.28E-02 |
| mir-3p   | hsa-miR-654-3p           | 3.75  | -0.04 | 2.47E-03 | 6.36E-02 |
| snoRNA   | HBI-100                  | 4.44  | -0.02 | 2.48E-03 | 6.36E-02 |
| tRF5     | chr16.tRNA23-LysTTT-tRF5 | 3.56  | 0.02  | 3.05E-03 | 7.50E-02 |
| tRNA     | chr11.tRNA13-PheGAA      | 3.60  | 0.03  | 3.06E-03 | 7.50E-02 |
| rRNA     | 5S-L997                  | 1.97  | 0.04  | 3.14E-03 | 7.50E-02 |
| mir-5p   | hsa-miR-1234-5p          | 14.77 | 0.02  | 3.19E-03 | 7.50E-02 |
| scRNA    | BC200-L165               | 1.54  | 0.03  | 3.19E-03 | 7.50E-02 |
| snRNA    | U2-L1074                 | 3.34  | 0.02  | 3.23E-03 | 7.50E-02 |
| tRNA     | chr11.tRNA12-ProTGG      | 8.16  | -0.02 | 3.35E-03 | 7.67E-02 |
| rRNA     | LSU-rRNA_Hsa-L275        | 5.54  | 0.02  | 3.67E-03 | 7.69E-02 |
| rRNA     | 5S-L105                  | 5.89  | 0.01  | 3.68E-03 | 7.69E-02 |
| tRF5     | chr1.tRNA98-ValCAC-tRF5  | 2.64  | 0.02  | 3.70E-03 | 7.69E-02 |
| piRNA    | piR-31447                | 1.47  | -0.04 | 3.70E-03 | 7.69E-02 |
| scRNA    | HY5-L21                  | 11.03 | 0.01  | 3.71E-03 | 7.69E-02 |
| mir-3p   | hsa-miR-148a-3p          | 13.46 | -0.01 | 3.71E-03 | 7.69E-02 |
| mir-5p3p | hsa-miR-1246             | 5.82  | 0.02  | 3.72E-03 | 7.69E-02 |
| tRNA     | chr1.tRNA2-GlyCCC        | 5.38  | -0.02 | 3.95E-03 | 8.05E-02 |
| mir-5p   | hsa-miR-224-5p           | 6.88  | -0.02 | 4.04E-03 | 8.12E-02 |
| scRNA    | HY5-L8                   | 3.89  | 0.02  | 4.25E-03 | 8.40E-02 |
| piRNA    | piR-61646-L2             | 8.65  | -0.02 | 4.29E-03 | 8.40E-02 |
| snRNA    | U2-L603                  | 6.16  | 0.02  | 4.47E-03 | 8.62E-02 |
| rRNA     | LSU-rRNA_Hsa-L19         | 2.11  | 0.02  | 4.77E-03 | 8.98E-02 |
| snRNA    | U2-L981                  | 4.06  | 0.02  | 4.77E-03 | 8.98E-02 |
| tRNA     | chr12.tRNA5-AspGTC       | 4.66  | 0.01  | 4.87E-03 | 9.06E-02 |
| piRNA    | piR-31925-L8             | 7.36  | -0.02 | 5.02E-03 | 9.22E-02 |
| snRNA    | U6-L1561                 | 2.11  | 0.03  | 5.10E-03 | 9.24E-02 |



|           |                            |       |       |          |      |
|-----------|----------------------------|-------|-------|----------|------|
| mir-3p    | hsa-miR-493-3p             | 3.21  | -0.03 | 5.33E-03 | 0.10 |
| tRNA      | chr2.tRNA22-PseudoTTG      | 3.04  | -0.02 | 5.44E-03 | 0.10 |
| mir-5p3pn | hsa-miR-203a               | 2.28  | -0.04 | 5.44E-03 | 0.10 |
| mir-5p3pn | hsa-miR-3609               | 2.88  | -0.03 | 5.62E-03 | 0.10 |
| mir-3p    | hsa-miR-381-3p             | 4.43  | -0.03 | 5.85E-03 | 0.10 |
| snoRNA    | U20                        | 6.66  | -0.02 | 5.86E-03 | 0.10 |
| tRNA      | chr11.tRNA11-LysTTT        | 7.37  | 0.02  | 5.99E-03 | 0.10 |
| scRNA     | BC200-L13                  | 2.84  | 0.02  | 6.25E-03 | 0.10 |
| piRNA     | piR-31115-L4               | 7.28  | 0.01  | 6.25E-03 | 0.10 |
| snRNA     | U3-L18                     | 6.00  | 0.02  | 6.32E-03 | 0.10 |
| snRNA     | U2-L250                    | 12.48 | 0.02  | 6.48E-03 | 0.10 |
| rRNA      | 5S-L1114                   | 1.68  | 0.02  | 6.56E-03 | 0.10 |
| tRNA      | chr14.tRNA16-TyrGTA        | 3.58  | 0.03  | 6.65E-03 | 0.10 |
| snRNA     | U2-L75                     | 4.87  | 0.02  | 6.70E-03 | 0.10 |
| piRNA     | piR-57516                  | 5.25  | 0.01  | 6.87E-03 | 0.11 |
| snRNA     | U2-L342                    | 5.41  | 0.02  | 7.02E-03 | 0.11 |
| piRNA     | piR-31068-L3               | 3.12  | -0.02 | 7.53E-03 | 0.11 |
| tRNA      | chr6.tRNA11-IleAAT         | 8.31  | 0.02  | 7.56E-03 | 0.11 |
| mir-5p    | hsa-miR-340-5p             | 6.42  | -0.01 | 7.62E-03 | 0.11 |
| snRNA     | U2-L405                    | 3.56  | 0.02  | 7.74E-03 | 0.11 |
| mir-5p3pn | hsa-miR-1290               | 2.06  | 0.03  | 7.92E-03 | 0.11 |
| snRNA     | U2-L537                    | 2.76  | 0.02  | 7.94E-03 | 0.11 |
| scRNA     | BC200-L12                  | 1.72  | 0.03  | 7.95E-03 | 0.11 |
| rRNA      | LSU-rRNA_Hsa-L198          | 7.74  | 0.01  | 8.46E-03 | 0.12 |
| rRNA      | 5S-L602                    | 5.12  | 0.02  | 8.53E-03 | 0.12 |
| rRNA      | 5S-L573                    | 3.03  | 0.02  | 8.63E-03 | 0.12 |
| rRNA      | LSU-rRNA_Hsa-L63           | 4.97  | 0.04  | 8.72E-03 | 0.12 |
| mir-5p    | hsa-miR-146a-5p            | 9.39  | -0.01 | 8.75E-03 | 0.12 |
| snRNA     | U2-L615                    | 13.00 | 0.02  | 8.93E-03 | 0.12 |
| tRNA      | chr6.tRNA172-SerTGA        | 1.90  | 0.04  | 9.06E-03 | 0.12 |
| mir-3p    | hsa-miR-1306-3p            | 2.00  | -0.03 | 9.32E-03 | 0.12 |
| tRF5      | chr1.tRNA104-PseudoGTT-tRF | 2.69  | 0.02  | 9.64E-03 | 0.13 |
| tRNA      | chr1.tRNA116-GluCTC        | 3.79  | 0.01  | 9.74E-03 | 0.13 |
| mir-3p    | hsa-miR-361-3p             | 7.04  | -0.01 | 9.82E-03 | 0.13 |
| piRNA     | piR-31638-L3               | 7.00  | -0.02 | 9.94E-03 | 0.13 |
| scRNA     | HY1-L273                   | 1.90  | 0.02  | 1.02E-02 | 0.13 |
| scRNA     | HY5                        | 1.57  | 0.02  | 1.02E-02 | 0.13 |
| scRNA     | BC200-L151                 | 2.08  | 0.02  | 1.05E-02 | 0.13 |
| rRNA      | SSU-rRNA_Hsa-L74           | 6.51  | 0.01  | 1.12E-02 | 0.14 |
| rRNA      | LSU-rRNA_Hsa-L102          | 3.17  | 0.02  | 1.17E-02 | 0.14 |
| mir-5p    | hsa-miR-330-5p             | 1.63  | 0.02  | 1.18E-02 | 0.14 |
| mir-3p    | hsa-miR-181c-3p            | 1.57  | -0.03 | 1.18E-02 | 0.14 |
| mir-5p    | hsa-miR-15b-5p             | 2.73  | -0.02 | 1.18E-02 | 0.14 |

|           |                            |       |       |          |      |
|-----------|----------------------------|-------|-------|----------|------|
| scRNA     | BC200-L76                  | 2.55  | 0.02  | 1.19E-02 | 0.14 |
| snoRNA    | ACA45                      | 6.69  | -0.01 | 1.22E-02 | 0.14 |
| tRF3      | chr17.tRNA1-Pseudo???-tRF3 | 2.09  | -0.03 | 1.25E-02 | 0.14 |
| mir-5p    | hsa-miR-214-5p             | 1.57  | -0.04 | 1.25E-02 | 0.14 |
| tRNA      | chr6.tRNA152-ValCAC        | 8.52  | -0.01 | 1.26E-02 | 0.14 |
| rRNA      | SSU-rRNA_Hsa-L72           | 14.26 | 0.01  | 1.29E-02 | 0.15 |
| scRNA     | BC200-L93                  | 1.58  | 0.03  | 1.30E-02 | 0.15 |
| tRNA      | chr2.tRNA13-AlaCGC         | 6.52  | -0.02 | 1.30E-02 | 0.15 |
| rRNA      | LSU-rRNA_Hsa-L366          | 4.93  | -0.02 | 1.35E-02 | 0.15 |
| scRNA     | BC200-L18                  | 3.08  | 0.02  | 1.39E-02 | 0.15 |
| piRNA     | piR-35468                  | 4.14  | 0.02  | 1.40E-02 | 0.15 |
| tRNA      | chr6.tRNA148-SerTGA        | 3.55  | 0.03  | 1.41E-02 | 0.15 |
| snRNA     | U7-L212                    | 2.30  | 0.03  | 1.41E-02 | 0.15 |
| tRNA      | chr16.tRNA4-ProAGG         | 2.50  | -0.02 | 1.42E-02 | 0.15 |
| scRNA     | BC200-L166                 | 2.95  | 0.02  | 1.43E-02 | 0.15 |
| scRNA     | BC200-L122                 | 3.31  | 0.01  | 1.44E-02 | 0.15 |
| piRNA     | piR-36741                  | 6.41  | -0.02 | 1.45E-02 | 0.15 |
| scRNA     | BC200-L128                 | 2.65  | 0.02  | 1.45E-02 | 0.15 |
| rRNA      | SSU-rRNA_Hsa-L50           | 4.47  | 0.02  | 1.47E-02 | 0.15 |
| piRNA     | piR-35548-L2               | 7.18  | -0.02 | 1.49E-02 | 0.15 |
| mir-3p    | hsa-miR-101-3p             | 10.61 | -0.01 | 1.51E-02 | 0.15 |
| snRNA     | U2-L479                    | 1.54  | 0.02  | 1.52E-02 | 0.15 |
| rRNA      | LSU-rRNA_Hsa-L18           | 5.98  | 0.02  | 1.52E-02 | 0.15 |
| mir-5p3pn | hsa-miR-760                | 2.39  | -0.02 | 1.52E-02 | 0.15 |
| snoRNA    | HBII-429                   | 4.20  | -0.02 | 1.57E-02 | 0.15 |
| snRNA     | U5-L108                    | 2.22  | 0.03  | 1.57E-02 | 0.15 |
| snoRNA    | U33                        | 4.23  | -0.02 | 1.59E-02 | 0.15 |
| scRNA     | HY1-L442                   | 1.33  | -0.03 | 1.59E-02 | 0.15 |
| tRF3      | chr17.tRNA13-GlyCCC-tRF3   | 5.22  | 0.01  | 1.63E-02 | 0.16 |
| scRNA     | BC200-L167                 | 1.58  | 0.02  | 1.63E-02 | 0.16 |
| mir-3p    | hsa-miR-143-3p             | 9.70  | -0.01 | 1.64E-02 | 0.16 |
| mir-5p    | hsa-miR-584-5p             | 7.31  | -0.01 | 1.65E-02 | 0.16 |
| tRNA      | chr6.tRNA128-GlyGCC        | 4.35  | 0.01  | 1.69E-02 | 0.16 |
| tRNA      | chr17.tRNA18-ArgCCT        | 1.71  | 0.02  | 1.76E-02 | 0.16 |
| tRNA      | chr6.tRNA30-ProCGG         | 10.88 | -0.01 | 1.78E-02 | 0.17 |
| rRNA      | LSU-rRNA_Hsa-L409          | 4.71  | 0.01  | 1.86E-02 | 0.17 |
| snRNA     | U2-L532                    | 3.08  | 0.02  | 1.87E-02 | 0.17 |
| mir-5p    | hsa-miR-432-5p             | 5.13  | -0.02 | 1.90E-02 | 0.17 |
| scRNA     | HY1-L175                   | 2.06  | 0.03  | 1.92E-02 | 0.17 |
| mir-5p3pn | hsa-miR-4485               | 4.29  | -0.02 | 1.97E-02 | 0.18 |
| mir-5p    | hsa-miR-181a-5p-L2         | 8.55  | -0.01 | 1.99E-02 | 0.18 |
| tRNA      | chr6.tRNA86-PseudoTAC      | 2.07  | -0.03 | 2.02E-02 | 0.18 |
| tRNA      | chr16.tRNA2-ArgCCT         | 3.09  | 0.01  | 2.03E-02 | 0.18 |

|           |                            |       |       |          |      |
|-----------|----------------------------|-------|-------|----------|------|
| mir-5p3pn | hsa-miR-511-L2             | 3.90  | -0.03 | 2.06E-02 | 0.18 |
| mir-5p3pn | hsa-miR-152                | 5.59  | -0.01 | 2.06E-02 | 0.18 |
| scRNA     | BC200-L4                   | 3.40  | 0.01  | 2.09E-02 | 0.18 |
| snRNA     | U2-L887                    | 6.33  | 0.01  | 2.11E-02 | 0.18 |
| tRF5      | chr5.tRNA22-AspGTC-tRF5    | 2.30  | 0.02  | 2.12E-02 | 0.18 |
| tRNA      | chr2.tRNA11-PseudoTTG      | 6.71  | -0.02 | 2.12E-02 | 0.18 |
| scRNA     | BC200-L90                  | 2.60  | 0.02  | 2.17E-02 | 0.18 |
| tRNA      | chr6.tRNA4-ArgTCG          | 2.79  | 0.03  | 2.20E-02 | 0.18 |
| scRNA     | HY4-L112                   | 3.97  | -0.01 | 2.20E-02 | 0.18 |
| piRNA     | piR-31638                  | 1.74  | -0.03 | 2.20E-02 | 0.18 |
| mir-5p    | hsa-let-7i-5p              | 12.19 | -0.01 | 2.23E-02 | 0.19 |
| mir-5p3pn | hsa-miR-375                | 6.00  | -0.02 | 2.27E-02 | 0.19 |
| scRNA     | HY5-L11                    | 5.18  | 0.01  | 2.29E-02 | 0.19 |
| snoRNA    | ACA61                      | 2.03  | 0.03  | 2.30E-02 | 0.19 |
| snRNA     | U1-L29                     | 2.03  | 0.02  | 2.31E-02 | 0.19 |
| scRNA     | BC200-L100                 | 1.69  | 0.04  | 2.33E-02 | 0.19 |
| piRNA     | piR-36041                  | 7.32  | -0.01 | 2.33E-02 | 0.19 |
| tRNA      | chr12.tRNA11-PheGAA        | 1.77  | 0.03  | 2.42E-02 | 0.19 |
| mir-3p    | hsa-miR-25-3p              | 12.18 | -0.01 | 2.42E-02 | 0.19 |
| mir-5p    | hsa-miR-21-5p              | 13.59 | -0.01 | 2.47E-02 | 0.20 |
| mir-5p3pn | hsa-miR-103b-L2            | 3.90  | -0.02 | 2.50E-02 | 0.20 |
| mir-5p    | hsa-miR-223-5p             | 8.71  | -0.01 | 2.52E-02 | 0.20 |
| piRNA     | piR-61298                  | 1.92  | -0.04 | 2.53E-02 | 0.20 |
| mir-5p    | hsa-miR-98-5p              | 6.17  | -0.01 | 2.55E-02 | 0.20 |
| rRNA      | 5S-L95                     | 1.71  | 0.02  | 2.61E-02 | 0.20 |
| rRNA      | LSU-rRNA_Hsa-L208          | 7.16  | 0.01  | 2.63E-02 | 0.20 |
| tRF5      | chr1.tRNA130-ValCAC-tRF5   | 2.38  | 0.02  | 2.67E-02 | 0.20 |
| mir-3p    | hsa-miR-30e-3p             | 8.45  | -0.01 | 2.71E-02 | 0.21 |
| scRNA     | HY4-L134                   | 2.51  | -0.02 | 2.76E-02 | 0.21 |
| rRNA      | LSU-rRNA_Hsa-L143          | 5.07  | 0.01  | 2.77E-02 | 0.21 |
| snoRNA    | U95                        | 6.95  | -0.01 | 2.77E-02 | 0.21 |
| rRNA      | LSU-rRNA_Hsa-L247          | 1.53  | 0.02  | 2.79E-02 | 0.21 |
| tRF3      | chr19.tRNA9-PseudoTTT-tRF3 | 1.65  | 0.02  | 2.82E-02 | 0.21 |
| snoRNA    | U50B                       | 4.34  | -0.02 | 2.86E-02 | 0.21 |
| mir-5p3pn | hsa-miR-1-L2               | 4.82  | -0.02 | 2.95E-02 | 0.21 |
| piRNA     | piR-60565-L4               | 12.26 | -0.01 | 2.96E-02 | 0.21 |
| piRNA     | piR-60576-L6               | 8.04  | -0.01 | 2.97E-02 | 0.21 |
| snoRNA    | ACA58                      | 1.85  | -0.03 | 2.98E-02 | 0.21 |
| tRNA      | chr1.tRNA39-GlyGCC         | 11.35 | -0.01 | 2.99E-02 | 0.21 |
| mir-3p    | hsa-miR-1273g-3p           | 5.83  | 0.01  | 3.00E-02 | 0.21 |
| mir-5p3pn | hsa-miR-181d               | 3.90  | -0.01 | 3.00E-02 | 0.21 |
| tRNA      | chr1.tRNA16-HisGTG         | 11.64 | -0.01 | 3.01E-02 | 0.21 |
| tRNA      | chr16.tRNA19-GlyGCC        | 1.89  | 0.02  | 3.02E-02 | 0.21 |

|           |                            |       |       |          |      |
|-----------|----------------------------|-------|-------|----------|------|
| mir-5p    | hsa-miR-382-5p             | 5.88  | -0.02 | 3.08E-02 | 0.22 |
| rRNA      | SSU-rRNA_Hsa-L33           | 12.79 | 0.01  | 3.13E-02 | 0.22 |
| mir-5p    | hsa-miR-483-5p             | 4.02  | 0.02  | 3.15E-02 | 0.22 |
| scRNA     | HY1-L352                   | 1.78  | 0.03  | 3.17E-02 | 0.22 |
| mir-5p    | hsa-miR-30d-5p             | 10.84 | -0.01 | 3.19E-02 | 0.22 |
| mir-3p    | hsa-miR-1185-1-3p          | 2.25  | -0.03 | 3.19E-02 | 0.22 |
| rRNA      | SSU-rRNA_Hsa-L65           | 4.29  | 0.01  | 3.20E-02 | 0.22 |
| snRNA     | U1-L142                    | 4.24  | -0.02 | 3.24E-02 | 0.22 |
| mir-5p    | hsa-miR-342-5p             | 6.55  | -0.01 | 3.25E-02 | 0.22 |
| piRNA     | piR-47305                  | 9.66  | -0.01 | 3.30E-02 | 0.22 |
| scRNA     | BC200-L140                 | 7.01  | 0.01  | 3.32E-02 | 0.22 |
| rRNA      | LSU-rRNA_Hsa-L341          | 1.93  | -0.03 | 3.36E-02 | 0.22 |
| rRNA      | 5S-L612                    | 2.86  | 0.02  | 3.40E-02 | 0.23 |
| tRNA      | chr5.tRNA22-AspGTC         | 1.97  | 0.02  | 3.43E-02 | 0.23 |
| mir-3p    | hsa-miR-382-3p             | 2.29  | -0.02 | 3.45E-02 | 0.23 |
| piRNA     | piR-36499                  | 1.68  | 0.02  | 3.55E-02 | 0.23 |
| rRNA      | 5S-L472                    | 2.70  | 0.02  | 3.56E-02 | 0.23 |
| rRNA      | LSU-rRNA_Hsa-L367          | 7.90  | 0.01  | 3.57E-02 | 0.23 |
| tRNA      | chr13.tRNA2-PseudoCTC      | 4.77  | -0.01 | 3.58E-02 | 0.23 |
| mir-3p    | hsa-miR-21-3p              | 1.95  | 0.02  | 3.65E-02 | 0.24 |
| rRNA      | 5S-L108                    | 11.53 | 0.01  | 3.68E-02 | 0.24 |
| mir-5p3pn | hsa-miR-548j               | 1.81  | -0.03 | 3.75E-02 | 0.24 |
| mir-3p    | hsa-miR-323a-3p            | 3.26  | -0.02 | 3.76E-02 | 0.24 |
| snRNA     | U2-L782                    | 2.99  | 0.02  | 3.79E-02 | 0.24 |
| mir-3p    | hsa-miR-495-3p             | 2.88  | -0.02 | 3.80E-02 | 0.24 |
| rRNA      | LSU-rRNA_Hsa-L130          | 4.63  | 0.02  | 3.80E-02 | 0.24 |
| tRF3      | chr3.tRNA10-PseudoCTC-tRF3 | 1.55  | 0.03  | 3.81E-02 | 0.24 |
| rRNA      | 5S-L356                    | 5.32  | 0.01  | 3.84E-02 | 0.24 |
| tRNA      | chr7.tRNA3-ArgCCT          | 5.38  | 0.01  | 3.85E-02 | 0.24 |
| tRF5      | chr9.tRNA6-AspGTC-tRF5     | 2.90  | 0.01  | 3.87E-02 | 0.24 |
| tRNA      | chr6.tRNA143-LysTTT        | 5.55  | 0.02  | 3.91E-02 | 0.24 |
| rRNA      | SSU-rRNA_Hsa-L80           | 6.73  | 0.01  | 3.93E-02 | 0.24 |
| rRNA      | 5S-L109                    | 9.56  | 0.01  | 3.93E-02 | 0.24 |
| mir-3p    | hsa-miR-223-3p             | 7.30  | -0.01 | 4.04E-02 | 0.24 |
| rRNA      | LSU-rRNA_Hsa-L211          | 1.63  | 0.02  | 4.05E-02 | 0.24 |
| mir-5p    | hsa-miR-744-5p             | 6.54  | -0.01 | 4.06E-02 | 0.24 |
| mir-3p    | hsa-miR-23b-3p             | 3.56  | -0.02 | 4.11E-02 | 0.25 |
| scRNA     | HY3-L279                   | 5.21  | 0.01  | 4.14E-02 | 0.25 |
| rRNA      | LSU-rRNA_Hsa-L388          | 10.79 | 0.01  | 4.14E-02 | 0.25 |
| snoRNA    | U3-3                       | 2.21  | -0.03 | 4.17E-02 | 0.25 |
| snoRNA    | mgU2-19/30                 | 3.71  | 0.01  | 4.24E-02 | 0.25 |
| tRF3      | chr2.tRNA21-SerTGA-tRF3    | 2.33  | -0.03 | 4.25E-02 | 0.25 |
| tRF3      | chr10.tRNA5-PseudoCTG-tRF3 | 1.70  | -0.02 | 4.26E-02 | 0.25 |

|           |                        |       |       |          |      |
|-----------|------------------------|-------|-------|----------|------|
| mir-5p3pn | hsa-miR-889            | 2.82  | -0.02 | 4.27E-02 | 0.25 |
| rRNA      | LSU-rRNA_Hsa-L150      | 3.40  | 0.01  | 4.42E-02 | 0.26 |
| mir-3p    | hsa-miR-191-3p         | 1.89  | -0.03 | 4.43E-02 | 0.26 |
| rRNA      | LSU-rRNA_Hsa-L13       | 12.04 | 0.01  | 4.49E-02 | 0.26 |
| snoRNA    | U3-4                   | 7.31  | -0.01 | 4.56E-02 | 0.26 |
| mir-3p    | hsa-miR-409-3p         | 5.71  | -0.02 | 4.63E-02 | 0.26 |
| scRNA     | BC200-L31              | 1.42  | 0.02  | 4.65E-02 | 0.26 |
| mir-5p    | hsa-miR-92b-5p         | 2.27  | 0.02  | 4.67E-02 | 0.26 |
| mir-5p3pn | hsa-miR-3168           | 2.09  | 0.02  | 4.71E-02 | 0.27 |
| rRNA      | SSU-rRNA_Hsa-L30       | 11.12 | 0.01  | 4.77E-02 | 0.27 |
| mir-5p3pn | hsa-miR-128            | 8.32  | -0.01 | 4.81E-02 | 0.27 |
| rRNA      | 5S-L106                | 12.29 | 0.01  | 4.93E-02 | 0.28 |
| mir-3p    | hsa-miR-450a-3p        | 1.54  | -0.03 | 4.97E-02 | 0.28 |
| rRNA      | LSU-rRNA_Hsa-L147      | 2.70  | 0.02  | 5.03E-02 | 0.28 |
| snRNA     | U2-L386                | 2.89  | 0.02  | 5.08E-02 | 0.28 |
| piRNA     | piR-31986              | 8.37  | -0.01 | 5.15E-02 | 0.28 |
| rRNA      | 5S-L530                | 5.17  | 0.02  | 5.21E-02 | 0.29 |
| mir-3p    | hsa-miR-5480-3p-L2     | 3.13  | -0.02 | 5.22E-02 | 0.29 |
| mir-3p    | hsa-miR-140-3p         | 9.02  | -0.01 | 5.23E-02 | 0.29 |
| snoRNA    | HBII-295               | 3.05  | -0.02 | 5.36E-02 | 0.29 |
| scRNA     | HY4-L89                | 8.76  | -0.01 | 5.37E-02 | 0.29 |
| tRNA      | chr17.tRNA2-LysTTT     | 3.04  | 0.02  | 5.40E-02 | 0.29 |
| scRNA     | BC200-L148             | 2.11  | 0.02  | 5.44E-02 | 0.29 |
| tRNA      | chr17.tRNA5-GlyGCC     | 7.52  | -0.01 | 5.48E-02 | 0.29 |
| rRNA      | 5S-L101                | 9.06  | 0.01  | 5.51E-02 | 0.29 |
| tRNA      | chr1.tRNA72-AspGTC     | 7.23  | 0.01  | 5.52E-02 | 0.29 |
| rRNA      | LSU-rRNA_Hsa-L203      | 5.91  | 0.01  | 5.54E-02 | 0.29 |
| mir-3p    | hsa-miR-4446-3p        | 3.56  | -0.01 | 5.58E-02 | 0.29 |
| snoRNA    | U15B                   | 2.20  | -0.02 | 5.61E-02 | 0.29 |
| rRNA      | 5S-L1234               | 5.10  | 0.01  | 5.65E-02 | 0.30 |
| mir-5p    | hsa-miR-411-5p         | 2.70  | -0.02 | 5.66E-02 | 0.30 |
| tRNA      | chr1.tRNA128-LysCTT    | 3.24  | 0.02  | 5.68E-02 | 0.30 |
| scRNA     | BC200-L110             | 1.47  | 0.02  | 5.71E-02 | 0.30 |
| rRNA      | 5S-L98                 | 9.83  | 0.01  | 5.76E-02 | 0.30 |
| tRNA      | chr15.tRNA4-ArgTCG     | 2.60  | 0.02  | 5.76E-02 | 0.30 |
| mir-3p    | hsa-miR-1307-3p        | 7.96  | -0.01 | 5.80E-02 | 0.30 |
| piRNA     | piR-58356              | 5.40  | -0.01 | 5.86E-02 | 0.30 |
| snRNA     | U1-L8                  | 6.14  | 0.01  | 5.87E-02 | 0.30 |
| snRNA     | U6-L9                  | 4.67  | 0.01  | 5.88E-02 | 0.30 |
| tRF3      | chr3.tRNA6-CysGCA-tRF3 | 2.19  | 0.02  | 5.88E-02 | 0.30 |
| tRNA      | chr12.tRNA2-SerCGA     | 1.51  | 0.04  | 5.88E-02 | 0.30 |
| mir-3p    | hsa-miR-3591-3p        | 12.23 | -0.02 | 5.91E-02 | 0.30 |
| mir-5p    | hsa-miR-196b-5p        | 2.79  | -0.02 | 5.93E-02 | 0.30 |

|          |                            |       |       |          |      |
|----------|----------------------------|-------|-------|----------|------|
| tRNA     | chr1.tRNA85-ValCAC         | 3.44  | 0.01  | 5.98E-02 | 0.30 |
| piRNA    | piR-35952-L4               | 3.22  | -0.03 | 6.05E-02 | 0.30 |
| scRNA    | HY1-L374                   | 8.15  | 0.01  | 6.11E-02 | 0.30 |
| tRNA     | chr14.tRNA4-ThrTGT         | 1.44  | 0.02  | 6.14E-02 | 0.30 |
| scRNA    | BC200-L155                 | 2.70  | 0.02  | 6.14E-02 | 0.30 |
| piRNA    | piR-32950                  | 6.31  | 0.01  | 6.23E-02 | 0.30 |
| tRF5     | chr17.tRNA33-PseudoTTG-tRF | 5.92  | -0.01 | 6.25E-02 | 0.30 |
| rRNA     | 5S-L1217                   | 1.70  | 0.02  | 6.27E-02 | 0.30 |
| mir-3p   | hsa-miR-24-3p              | 8.44  | -0.01 | 6.31E-02 | 0.30 |
| mir-3p   | hsa-miR-139-3p             | 3.31  | -0.01 | 6.31E-02 | 0.30 |
| rRNA     | 5S-L583                    | 2.69  | 0.03  | 6.32E-02 | 0.30 |
| tRNA     | chr1.tRNA64-GluTTC         | 7.89  | -0.01 | 6.33E-02 | 0.30 |
| rRNA     | LSU-rRNA_Hsa-L403          | 9.95  | 0.01  | 6.33E-02 | 0.30 |
| scRNA    | BC200-L129                 | 2.19  | 0.02  | 6.36E-02 | 0.30 |
| mir-5p   | hsa-miR-485-5p             | 4.19  | -0.02 | 6.38E-02 | 0.30 |
| mir-3p   | hsa-let-7a-3p-L2           | 3.03  | -0.02 | 6.41E-02 | 0.30 |
| scRNA    | BC200-L120                 | 1.92  | 0.02  | 6.48E-02 | 0.31 |
| mir-5p   | hsa-miR-3158-5p-L2         | 1.49  | 0.03  | 6.49E-02 | 0.31 |
| piRNA    | piR-53129                  | 1.55  | 0.02  | 6.51E-02 | 0.31 |
| rRNA     | LSU-rRNA_Hsa-L236          | 1.43  | 0.02  | 6.55E-02 | 0.31 |
| snoRNA   | U36A                       | 1.72  | -0.03 | 6.56E-02 | 0.31 |
| snRNA    | U2-L128                    | 7.39  | 0.01  | 6.62E-02 | 0.31 |
| tRNA     | chr6.tRNA74-LeuCAA         | 2.43  | 0.01  | 6.65E-02 | 0.31 |
| scRNA    | HY3-L84                    | 6.39  | -0.01 | 6.67E-02 | 0.31 |
| piRNA    | piR-43325-L7               | 3.82  | 0.01  | 6.74E-02 | 0.31 |
| mir-3p   | hsa-miR-27b-3p             | 8.94  | -0.01 | 7.01E-02 | 0.32 |
| tRNA     | chr5.tRNA6-ValCAC          | 10.69 | -0.01 | 7.01E-02 | 0.32 |
| rRNA     | LSU-rRNA_Hsa-L189          | 4.24  | 0.01  | 7.01E-02 | 0.32 |
| piRNA    | piR-50811                  | 3.43  | 0.01  | 7.13E-02 | 0.32 |
| piRNA    | piR-33065                  | 4.52  | -0.01 | 7.14E-02 | 0.32 |
| snRNA    | U1-L4                      | 8.27  | 0.01  | 7.14E-02 | 0.32 |
| rRNA     | 5S-L233                    | 2.20  | 0.02  | 7.24E-02 | 0.33 |
| mir-5p   | hsa-miR-146b-5p            | 7.71  | -0.01 | 7.24E-02 | 0.33 |
| mir-5p3p | hsa-miR-543                | 5.86  | -0.02 | 7.26E-02 | 0.33 |
| piRNA    | piR-60565-L12              | 10.99 | -0.01 | 7.34E-02 | 0.33 |
| tRNA     | chr17.tRNA23-ArgCCG        | 3.40  | 0.01  | 7.40E-02 | 0.33 |
| tRNA     | chr13.tRNA3-GluTTC         | 10.17 | -0.01 | 7.40E-02 | 0.33 |
| piRNA    | piR-36716                  | 2.88  | -0.02 | 7.41E-02 | 0.33 |
| mir-5p   | hsa-miR-532-5p             | 7.72  | -0.01 | 7.43E-02 | 0.33 |
| scRNA    | HY3-L525                   | 1.38  | -0.02 | 7.47E-02 | 0.33 |
| mir-5p   | hsa-let-7g-5p              | 11.06 | -0.01 | 7.49E-02 | 0.33 |
| scRNA    | BC200-L154                 | 1.42  | 0.02  | 7.58E-02 | 0.33 |
| mir-5p   | hsa-let-7f-5p-L2           | 6.10  | -0.01 | 7.65E-02 | 0.33 |

|           |                            |       |       |          |      |
|-----------|----------------------------|-------|-------|----------|------|
| rRNA      | LSU-rRNA_Hsa-L15           | 6.48  | 0.01  | 7.67E-02 | 0.33 |
| rRNA      | 5S-L526                    | 1.32  | 0.02  | 7.67E-02 | 0.33 |
| scRNA     | HY5-L19                    | 2.11  | 0.01  | 7.68E-02 | 0.33 |
| mir-5p3pn | hsa-miR-1244-L2            | 1.66  | 0.02  | 7.75E-02 | 0.33 |
| tRNA      | chr2.tRNA6-GluTTC          | 4.09  | -0.01 | 7.79E-02 | 0.34 |
| snRNA     | U5-L66                     | 6.99  | 0.01  | 7.81E-02 | 0.34 |
| scRNA     | HY4-L83                    | 4.19  | -0.01 | 7.90E-02 | 0.34 |
| piRNA     | piR-43772-L2               | 6.19  | -0.01 | 7.91E-02 | 0.34 |
| scRNA     | HY1-L159                   | 4.34  | 0.01  | 8.05E-02 | 0.34 |
| scRNA     | HY4-L57                    | 2.80  | -0.01 | 8.08E-02 | 0.34 |
| mir-3p    | hsa-miR-200a-3p            | 2.22  | -0.02 | 8.28E-02 | 0.35 |
| mir-5p    | hsa-miR-374a-5p            | 2.91  | -0.01 | 8.30E-02 | 0.35 |
| mir-3p    | hsa-miR-199b-3p            | 7.58  | -0.01 | 8.31E-02 | 0.35 |
| rRNA      | LSU-rRNA_Hsa-L375          | 10.09 | -0.01 | 8.38E-02 | 0.35 |
| snRNA     | U2-L709                    | 3.25  | -0.01 | 8.42E-02 | 0.35 |
| scRNA     | HY1-L124                   | 1.84  | 0.02  | 8.45E-02 | 0.35 |
| scRNA     | HY3-L287                   | 1.40  | -0.02 | 8.52E-02 | 0.35 |
| snRNA     | U3-L205                    | 4.79  | -0.01 | 8.56E-02 | 0.35 |
| rRNA      | 5S-L1179                   | 1.46  | 0.02  | 8.57E-02 | 0.35 |
| mir-5p    | hsa-miR-10a-5p             | 8.93  | -0.01 | 8.57E-02 | 0.35 |
| mir-5p3pn | hsa-miR-451a               | 12.70 | -0.01 | 8.66E-02 | 0.36 |
| tRF3      | chr6.tRNA37-ValAAC-tRF3    | 12.93 | 0.01  | 8.76E-02 | 0.36 |
| tRF3      | chrX.tRNA2-LeuTAA-tRF3     | 1.82  | -0.02 | 8.79E-02 | 0.36 |
| tRNA      | chr6.tRNA83-LeuTAA         | 2.22  | 0.01  | 8.90E-02 | 0.36 |
| rRNA      | LSU-rRNA_Hsa-L383          | 14.16 | 0.01  | 9.02E-02 | 0.37 |
| snoRNA    | SNORD119                   | 5.61  | -0.01 | 9.03E-02 | 0.37 |
| mir-3p    | hsa-miR-106b-3p            | 7.66  | -0.01 | 9.03E-02 | 0.37 |
| tRNA      | chr6.tRNA88-PseudoGAA      | 8.20  | 0.01  | 9.04E-02 | 0.37 |
| mir-5p    | hsa-miR-452-5p             | 1.74  | -0.02 | 9.07E-02 | 0.37 |
| rRNA      | 5S-L126                    | 2.55  | 0.01  | 9.10E-02 | 0.37 |
| mir-5p    | hsa-miR-221-5p             | 3.86  | -0.01 | 9.16E-02 | 0.37 |
| tRF5      | chr20.tRNA7-PseudoCTC-tRF5 | 1.39  | 0.02  | 9.24E-02 | 0.37 |
| mir-5p    | hsa-miR-6723-5p            | 4.58  | -0.01 | 9.25E-02 | 0.37 |
| mir-3p    | hsa-miR-221-3p             | 7.16  | -0.01 | 9.28E-02 | 0.37 |
| rRNA      | 5S-L500                    | 1.78  | 0.02  | 9.31E-02 | 0.37 |
| mir-5p    | hsa-miR-654-5p             | 3.09  | -0.02 | 9.35E-02 | 0.37 |
| tRNA      | chr5.tRNA15-ValAAC         | 4.70  | -0.01 | 9.37E-02 | 0.37 |
| rRNA      | LSU-rRNA_Hsa-L51           | 4.19  | -0.02 | 0.10     | 0.38 |
| scRNA     | BC200-L82                  | 1.75  | 0.02  | 0.10     | 0.38 |
| mir-5p    | hsa-miR-100-5p             | 6.59  | -0.01 | 0.10     | 0.38 |
| piRNA     | piR-31987                  | 6.33  | -0.01 | 0.10     | 0.38 |
| tRNA      | chr5.tRNA8-AlaTGC          | 3.15  | -0.02 | 0.10     | 0.39 |
| snoRNA    | ACA36                      | 1.90  | -0.02 | 0.10     | 0.39 |

|           |                            |       |       |      |      |
|-----------|----------------------------|-------|-------|------|------|
| mir-3p    | hsa-miR-30d-3p             | 1.67  | -0.02 | 0.10 | 0.39 |
| piRNA     | piR-43995-L4               | 6.52  | -0.01 | 0.10 | 0.40 |
| mir-5p    | hsa-miR-23b-5p             | 1.51  | -0.02 | 0.10 | 0.40 |
| tRF3      | chr1.tRNA55-LysTTT-tRF3    | 2.49  | 0.02  | 0.10 | 0.40 |
| mir-5p3pn | hsa-miR-941                | 6.39  | -0.01 | 0.10 | 0.40 |
| rRNA      | SSU-rRNA_Hsa-L10           | 11.45 | 0.01  | 0.10 | 0.40 |
| piRNA     | piR-33151-L8               | 4.43  | 0.01  | 0.10 | 0.40 |
| piRNA     | piR-33151-L12              | 2.94  | 0.01  | 0.10 | 0.40 |
| mir-3p    | hsa-miR-582-3p             | 4.81  | -0.01 | 0.10 | 0.40 |
| mir-3p    | hsa-miR-197-3p             | 2.69  | -0.02 | 0.11 | 0.40 |
| snoRNA    | U58C                       | 3.37  | -0.02 | 0.11 | 0.40 |
| mir-5p    | hsa-miR-503-5p             | 3.20  | -0.01 | 0.11 | 0.40 |
| mir-5p    | hsa-miR-181b-5p-L2         | 6.05  | -0.01 | 0.11 | 0.40 |
| scRNA     | BC200-L68                  | 2.33  | 0.02  | 0.11 | 0.40 |
| rRNA      | 5S-L100                    | 2.88  | 0.01  | 0.11 | 0.41 |
| rRNA      | LSU-rRNA_Hsa-L132          | 10.51 | 0.01  | 0.11 | 0.41 |
| mir-3p    | hsa-miR-130a-3p            | 3.58  | -0.01 | 0.11 | 0.41 |
| piRNA     | piR-36494                  | 2.00  | -0.02 | 0.11 | 0.41 |
| rRNA      | LSU-rRNA_Hsa-L202          | 3.79  | 0.01  | 0.11 | 0.41 |
| snoRNA    | HBI-115                    | 2.00  | -0.02 | 0.11 | 0.41 |
| rRNA      | 5S-L194                    | 2.89  | 0.01  | 0.11 | 0.41 |
| rRNA      | 5S-L1009                   | 2.50  | 0.02  | 0.11 | 0.41 |
| piRNA     | piR-35548-L3               | 2.78  | -0.02 | 0.11 | 0.41 |
| mir-3p    | hsa-miR-411-3p             | 1.75  | -0.02 | 0.11 | 0.41 |
| tRF3      | chr7.tRNA26-PseudoTTG-tRF3 | 2.25  | -0.02 | 0.11 | 0.41 |
| tRNA      | chr1.tRNA33-Pseudo???      | 3.33  | -0.01 | 0.11 | 0.41 |
| snRNA     | U2-L825                    | 3.19  | 0.01  | 0.11 | 0.41 |
| scRNA     | HY3-L282                   | 3.75  | 0.01  | 0.11 | 0.41 |
| tRF3      | chr14.tRNA10-IleAAT-tRF3   | 2.47  | 0.02  | 0.11 | 0.41 |
| mir-5p    | hsa-miR-126-5p             | 6.05  | -0.01 | 0.11 | 0.41 |
| rRNA      | 5S-L489                    | 5.18  | -0.02 | 0.11 | 0.41 |
| tRNA      | chr2.tRNA1-PseudoCCC       | 5.86  | -0.01 | 0.11 | 0.41 |
| rRNA      | 5S-L97                     | 10.24 | 0.01  | 0.12 | 0.41 |
| snRNA     | U2-L161                    | 12.39 | 0.01  | 0.12 | 0.41 |
| rRNA      | 5S-L957                    | 1.43  | -0.02 | 0.12 | 0.41 |
| snoRNA    | HBII-316                   | 2.03  | -0.02 | 0.12 | 0.41 |
| piRNA     | piR-32377                  | 6.91  | -0.01 | 0.12 | 0.41 |
| snoRNA    | U66                        | 1.79  | -0.02 | 0.12 | 0.41 |
| mir-3p    | hsa-miR-18a-3p             | 2.18  | -0.02 | 0.12 | 0.42 |
| snoRNA    | mgU6-77                    | 4.50  | -0.01 | 0.12 | 0.42 |
| mir-5p3pn | hsa-miR-487b               | 1.50  | -0.03 | 0.12 | 0.42 |
| piRNA     | piR-49143                  | 11.96 | -0.01 | 0.12 | 0.42 |
| mir-5p    | hsa-miR-99a-5p             | 7.41  | -0.01 | 0.12 | 0.42 |



|        |                          |       |       |      |      |
|--------|--------------------------|-------|-------|------|------|
| scRNA  | HY1-L190                 | 2.42  | 0.02  | 0.12 | 0.42 |
| mir-5p | hsa-miR-769-5p           | 3.02  | -0.01 | 0.12 | 0.43 |
| snoRNA | SNORD125                 | 1.69  | -0.02 | 0.12 | 0.43 |
| piRNA  | piR-32678                | 6.09  | 0.01  | 0.12 | 0.43 |
| mir-5p | hsa-miR-1228-5p          | 2.00  | -0.02 | 0.13 | 0.43 |
| tRNA   | chr6.tRNA73-ArgCCG       | 2.37  | 0.01  | 0.13 | 0.43 |
| snoRNA | U57                      | 4.69  | -0.01 | 0.13 | 0.43 |
| mir-3p | hsa-miR-181a-2-3p        | 4.18  | -0.01 | 0.13 | 0.44 |
| piRNA  | piR-61648                | 2.28  | 0.01  | 0.13 | 0.44 |
| rRNA   | LSU-rRNA_Hsa-L200        | 2.74  | 0.01  | 0.13 | 0.44 |
| tRNA   | chr17.tRNA15-CysGCA      | 6.11  | -0.01 | 0.13 | 0.44 |
| snoRNA | U42A                     | 4.44  | -0.02 | 0.13 | 0.44 |
| tRF5   | chr1.tRNA118-HisGTG-tRF5 | 1.83  | 0.02  | 0.13 | 0.44 |
| scRNA  | HY4-L58                  | 3.81  | -0.01 | 0.13 | 0.44 |
| snRNA  | U1-L11                   | 3.91  | -0.01 | 0.13 | 0.44 |
| snoRNA | U23                      | 1.46  | 0.02  | 0.13 | 0.45 |
| tRNA   | chr19.tRNA13-ValCAC      | 4.33  | -0.01 | 0.13 | 0.45 |
| mir-3p | hsa-miR-625-3p           | 4.68  | -0.01 | 0.13 | 0.45 |
| snoRNA | HBII-85-8                | 2.22  | 0.02  | 0.13 | 0.45 |
| scRNA  | HY3-L159                 | 3.19  | 0.02  | 0.14 | 0.45 |
| scRNA  | BC200-L85                | 1.96  | 0.01  | 0.14 | 0.45 |
| snoRNA | U91                      | 2.25  | -0.02 | 0.14 | 0.45 |
| tRF5   | chr3.tRNA5-LeuAAG-tRF5   | 3.59  | 0.01  | 0.14 | 0.45 |
| rRNA   | LSU-rRNA_Hsa-L212        | 3.25  | 0.01  | 0.14 | 0.45 |
| snRNA  | U5-L2                    | 6.33  | 0.01  | 0.14 | 0.45 |
| snoRNA | U59B                     | 7.06  | -0.01 | 0.14 | 0.45 |
| mir-5p | hsa-miR-93-5p            | 7.11  | -0.01 | 0.14 | 0.45 |
| tRNA   | chr6.tRNA130-GlnTTG      | 3.35  | 0.01  | 0.14 | 0.46 |
| tRNA   | chr2.tRNA23-GlnTTG       | 3.06  | -0.02 | 0.14 | 0.46 |
| scRNA  | HY4-L56                  | 1.82  | -0.01 | 0.14 | 0.46 |
| rRNA   | 5S-L676                  | 1.34  | 0.02  | 0.14 | 0.46 |
| mir-5p | hsa-miR-23a-5p           | 1.78  | 0.01  | 0.14 | 0.46 |
| scRNA  | BC200-L135               | 2.24  | 0.01  | 0.14 | 0.46 |
| tRNA   | chr6.tRNA40-ValTAC       | 2.73  | -0.01 | 0.14 | 0.47 |
| piRNA  | piR-52416-L2             | 2.29  | -0.01 | 0.15 | 0.47 |
| tRNA   | chr1.tRNA106-HisGTG      | 3.36  | -0.01 | 0.15 | 0.47 |
| rRNA   | 5S-L790                  | 4.09  | 0.01  | 0.15 | 0.47 |
| rRNA   | LSU-rRNA_Hsa-L48         | 1.64  | 0.02  | 0.15 | 0.47 |
| mir-3p | hsa-miR-3158-3p          | 3.71  | -0.01 | 0.15 | 0.47 |
| snoRNA | HBII-82B                 | 2.38  | -0.02 | 0.15 | 0.47 |
| piRNA  | piR-35548-L4             | 7.22  | -0.01 | 0.15 | 0.47 |
| rRNA   | 5S-L104                  | 10.61 | 0.01  | 0.15 | 0.47 |
| rRNA   | LSU-rRNA_Hsa-L346        | 1.67  | 0.01  | 0.15 | 0.47 |

|        |                            |      |       |      |      |
|--------|----------------------------|------|-------|------|------|
| snoRNA | U50                        | 5.82 | -0.01 | 0.15 | 0.47 |
| snoRNA | E2                         | 2.14 | -0.01 | 0.15 | 0.47 |
| piRNA  | piR-38502                  | 3.33 | -0.01 | 0.15 | 0.47 |
| piRNA  | piR-43325-L2               | 2.34 | 0.02  | 0.15 | 0.47 |
| tRNA   | chr12.tRNA4-AspGTC         | 4.64 | -0.01 | 0.15 | 0.47 |
| scRNA  | HY4-L37                    | 4.01 | -0.01 | 0.15 | 0.47 |
| tRNA   | chr17.tRNA17-SupTTA        | 2.90 | 0.01  | 0.15 | 0.47 |
| mir-5p | hsa-miR-338-5p             | 4.39 | -0.01 | 0.15 | 0.47 |
| tRNA   | chr17.tRNA20-MetCAT        | 1.87 | 0.02  | 0.15 | 0.47 |
| snoRNA | U90                        | 2.75 | 0.02  | 0.15 | 0.47 |
| snoRNA | U102                       | 7.38 | -0.01 | 0.15 | 0.47 |
| rRNA   | 5S-L71                     | 1.74 | 0.01  | 0.15 | 0.47 |
| scRNA  | HY1-L304                   | 3.88 | 0.01  | 0.15 | 0.47 |
| tRNA   | chr6.tRNA168-TrpCCA        | 2.05 | -0.02 | 0.15 | 0.47 |
| scRNA  | BC200-L8                   | 2.74 | 0.01  | 0.15 | 0.47 |
| mir-3p | hsa-miR-3529-3p            | 7.65 | -0.01 | 0.15 | 0.47 |
| mir-5p | hsa-miR-335-5p             | 3.57 | -0.01 | 0.15 | 0.47 |
| tRF5   | chr1.tRNA125-PseudoGTT-tRF | 1.49 | 0.02  | 0.15 | 0.47 |
| scRNA  | HY1-L178                   | 4.26 | 0.01  | 0.16 | 0.47 |
| scRNA  | BC200-L27                  | 2.96 | -0.01 | 0.16 | 0.48 |
| tRF5   | chr6.tRNA78-LeuAAG-tRF5    | 1.31 | 0.02  | 0.16 | 0.48 |
| tRNA   | chr6.tRNA14-TyrGTA         | 1.90 | 0.02  | 0.16 | 0.48 |
| rRNA   | 5S-L762                    | 4.86 | 0.01  | 0.16 | 0.48 |
| mir-3p | hsa-miR-103a-3p-L2         | 3.33 | -0.01 | 0.16 | 0.48 |
| mir-5p | hsa-miR-96-5p              | 2.20 | -0.02 | 0.16 | 0.48 |
| rRNA   | LSU-rRNA_Hsa-L345          | 2.84 | 0.01  | 0.16 | 0.48 |
| tRNA   | chr16.tRNA33-PseudoAGG     | 3.64 | -0.01 | 0.16 | 0.48 |
| tRNA   | chr2.tRNA3-AlaAGC          | 3.59 | -0.01 | 0.16 | 0.48 |
| tRF3   | chr16.tRNA31-PseudoTGG-tRF | 1.95 | 0.01  | 0.16 | 0.48 |
| rRNA   | LSU-rRNA_Hsa-L2            | 9.24 | 0.01  | 0.16 | 0.48 |
| snoRNA | HBII-382                   | 2.17 | -0.02 | 0.16 | 0.48 |
| tRNA   | chr1.tRNA131-GlyCCC        | 7.00 | -0.02 | 0.16 | 0.48 |
| scRNA  | BC200-L101                 | 1.85 | 0.02  | 0.16 | 0.48 |
| snoRNA | U45B                       | 2.57 | -0.02 | 0.16 | 0.48 |
| rRNA   | LSU-rRNA_Hsa-L283          | 2.11 | 0.01  | 0.16 | 0.48 |
| scRNA  | HY1-L302                   | 2.49 | -0.01 | 0.17 | 0.49 |
| snoRNA | U49B                       | 1.62 | -0.02 | 0.17 | 0.49 |
| mir-3p | hsa-miR-125b-2-3p          | 1.53 | -0.02 | 0.17 | 0.49 |
| tRNA   | chr18.tRNA4-LysCTT         | 6.31 | 0.01  | 0.17 | 0.49 |
| snoRNA | U99                        | 3.13 | 0.01  | 0.17 | 0.49 |
| snoRNA | SNORD126                   | 2.74 | -0.01 | 0.17 | 0.49 |
| scRNA  | HY3-L208                   | 1.34 | 0.01  | 0.17 | 0.49 |
| scRNA  | BC200-L164                 | 2.31 | 0.01  | 0.17 | 0.49 |

|           |                          |       |       |      |      |
|-----------|--------------------------|-------|-------|------|------|
| mir-3p    | hsa-miR-628-3p           | 3.76  | -0.01 | 0.17 | 0.49 |
| mir-3p    | hsa-miR-136-3p           | 2.62  | -0.01 | 0.17 | 0.49 |
| tRNA      | chr6.tRNA31-SerGCT       | 3.19  | -0.02 | 0.17 | 0.49 |
| snoRNA    | U58A                     | 5.02  | -0.01 | 0.17 | 0.49 |
| tRNA      | chr6.tRNA28-IleAAT       | 3.35  | 0.02  | 0.17 | 0.49 |
| tRNA      | chr6.tRNA85-PseudoTTC    | 4.59  | -0.01 | 0.17 | 0.49 |
| snRNA     | U2-L285                  | 2.96  | 0.01  | 0.17 | 0.49 |
| tRF5      | chr17.tRNA25-SeCTCA-tRF5 | 2.26  | 0.01  | 0.17 | 0.49 |
| scRNA     | HY4-L110                 | 1.99  | -0.02 | 0.17 | 0.49 |
| rRNA      | 5S-L111                  | 10.31 | 0.01  | 0.17 | 0.49 |
| mir-5p    | hsa-miR-589-5p           | 4.56  | 0.01  | 0.17 | 0.49 |
| rRNA      | 5S-L688                  | 4.43  | 0.01  | 0.17 | 0.49 |
| tRF3      | chr18.tRNA1-GluCTC-tRF3  | 2.27  | 0.01  | 0.17 | 0.49 |
| rRNA      | 5S-L282                  | 1.46  | 0.01  | 0.17 | 0.49 |
| rRNA      | SSU-rRNA_Hsa-L26         | 3.25  | 0.01  | 0.18 | 0.50 |
| mir-3p    | hsa-miR-342-3p           | 3.63  | -0.01 | 0.18 | 0.50 |
| snoRNA    | ACA36B                   | 3.84  | -0.01 | 0.18 | 0.50 |
| tRNA      | chr14.tRNA2-LeuTAG       | 2.26  | -0.02 | 0.18 | 0.50 |
| mir-5p3pn | hsa-miR-421              | 2.78  | -0.01 | 0.18 | 0.50 |
| mir-5p    | hsa-miR-16-5p-L2         | 8.44  | -0.01 | 0.18 | 0.50 |
| mir-3p    | hsa-miR-27a-3p           | 10.82 | -0.01 | 0.18 | 0.50 |
| rRNA      | LSU-rRNA_Hsa-L382        | 13.70 | 0.01  | 0.18 | 0.50 |
| rRNA      | 5S-L255                  | 2.65  | 0.01  | 0.18 | 0.50 |
| mir-5p    | hsa-miR-4787-5p          | 1.33  | 0.02  | 0.18 | 0.50 |
| tRNA      | chr6.tRNA37-ValAAC       | 9.05  | -0.01 | 0.18 | 0.50 |
| mir-5p3pn | hsa-miR-320e             | 1.85  | -0.01 | 0.18 | 0.50 |
| snoRNA    | HBII-142                 | 3.42  | -0.01 | 0.18 | 0.50 |
| rRNA      | LSU-rRNA_Hsa-L380        | 13.98 | 0.01  | 0.18 | 0.50 |
| piRNA     | piR-35411-L4             | 2.53  | -0.02 | 0.18 | 0.50 |
| tRNA      | chr6.tRNA87-GluCTC       | 15.82 | -0.01 | 0.18 | 0.50 |
| rRNA      | SSU-rRNA_Hsa-L46         | 6.10  | -0.01 | 0.19 | 0.51 |
| tRNA      | chr1.tRNA110-PseudoTTC   | 1.44  | -0.02 | 0.19 | 0.51 |
| tRNA      | chrX.tRNA4-ValTAC        | 5.20  | -0.01 | 0.19 | 0.51 |
| tRF5      | chr6.tRNA130-GlnTTG-tRF5 | 1.89  | 0.01  | 0.19 | 0.51 |
| mir-3p    | hsa-miR-425-3p           | 4.15  | -0.01 | 0.19 | 0.51 |
| rRNA      | LSU-rRNA_Hsa-L174        | 1.61  | 0.01  | 0.19 | 0.51 |
| mir-3p    | hsa-miR-10a-3p           | 1.82  | 0.01  | 0.19 | 0.51 |
| scRNA     | BC200-L16                | 1.59  | 0.02  | 0.19 | 0.51 |
| tRNA      | chr6.tRNA136-ValAAC      | 2.04  | 0.01  | 0.19 | 0.51 |
| mir-5p3pn | hsa-miR-378d-L2          | 1.37  | 0.01  | 0.19 | 0.51 |
| scRNA     | BC200-L117               | 1.83  | 0.01  | 0.19 | 0.52 |
| scRNA     | HY4-L44                  | 1.59  | 0.01  | 0.19 | 0.52 |
| scRNA     | HY1-L260                 | 4.88  | 0.01  | 0.19 | 0.52 |

|           |                            |       |       |      |      |
|-----------|----------------------------|-------|-------|------|------|
| snRNA     | U4-L40                     | 2.99  | 0.01  | 0.20 | 0.52 |
| rRNA      | 5S-L550                    | 2.32  | 0.01  | 0.20 | 0.52 |
| mir-5p3pn | hsa-miR-4461               | 2.06  | -0.02 | 0.20 | 0.52 |
| mir-5p3pn | hsa-miR-103b               | 8.26  | -0.01 | 0.20 | 0.52 |
| mir-3p    | hsa-miR-374c-3p            | 2.90  | -0.01 | 0.20 | 0.52 |
| mir-5p3pn | hsa-miR-378f               | 1.69  | 0.01  | 0.20 | 0.52 |
| tRNA      | chr6.tRNA100-LeuCAA        | 3.49  | 0.01  | 0.20 | 0.52 |
| tRNA      | chr6.tRNA157-ValCAC        | 1.40  | -0.01 | 0.20 | 0.52 |
| tRF5      | chr1.tRNA132-PseudoCAC-tRF | 2.10  | 0.01  | 0.20 | 0.52 |
| mir-5p    | hsa-miR-144-5p             | 5.62  | 0.01  | 0.20 | 0.52 |
| snoRNA    | U8-L17                     | 2.67  | 0.01  | 0.20 | 0.53 |
| mir-5p    | hsa-miR-9-5p-L3            | 3.10  | -0.01 | 0.20 | 0.53 |
| scRNA     | BC200-L147                 | 2.24  | 0.01  | 0.20 | 0.53 |
| tRNA      | chr16.tRNA16-LeuAAG        | 3.29  | -0.01 | 0.20 | 0.53 |
| scRNA     | BC200-L28                  | 2.06  | 0.01  | 0.20 | 0.53 |
| scRNA     | BC200-L37                  | 6.33  | 0.01  | 0.20 | 0.53 |
| tRF5      | chr14.tRNA4-ThrTGT-tRF5    | 2.23  | 0.01  | 0.20 | 0.53 |
| rRNA      | 5S-L803                    | 7.74  | 0.01  | 0.20 | 0.53 |
| scRNA     | BC200-L95                  | 3.20  | 0.01  | 0.20 | 0.53 |
| rRNA      | 5S-L829                    | 2.65  | 0.01  | 0.21 | 0.53 |
| tRNA      | chr17.tRNA3-GlnCTG         | 6.70  | 0.01  | 0.21 | 0.53 |
| mir-3p    | hsa-let-7f-1-3p            | 1.62  | -0.02 | 0.21 | 0.53 |
| snoRNA    | U41                        | 2.49  | -0.01 | 0.21 | 0.53 |
| scRNA     | HY1-L10                    | 1.56  | 0.01  | 0.21 | 0.53 |
| tRNA      | chr17.tRNA36-ThrAGT        | 2.02  | 0.01  | 0.21 | 0.53 |
| rRNA      | LSU-rRNA_Hsa-L220          | 4.41  | -0.01 | 0.21 | 0.53 |
| mir-5p3pn | hsa-miR-1250               | 1.50  | -0.01 | 0.21 | 0.54 |
| rRNA      | 5S-L357                    | 2.11  | 0.01  | 0.21 | 0.54 |
| mir-5p    | hsa-miR-20a-5p             | 7.17  | -0.01 | 0.21 | 0.54 |
| mir-5p    | hsa-miR-185-5p             | 8.24  | -0.01 | 0.21 | 0.54 |
| snRNA     | U2-L205                    | 1.72  | -0.02 | 0.21 | 0.54 |
| tRNA      | chr1.tRNA79-GlyTCC         | 1.87  | 0.02  | 0.21 | 0.54 |
| snRNA     | U1-L63                     | 2.53  | 0.01  | 0.21 | 0.54 |
| snoRNA    | U93                        | 1.72  | 0.02  | 0.22 | 0.54 |
| piRNA     | piR-37525                  | 1.54  | -0.02 | 0.22 | 0.54 |
| mir-3p    | hsa-miR-505-3p             | 2.00  | -0.01 | 0.22 | 0.54 |
| mir-5p    | hsa-miR-425-5p             | 5.12  | -0.01 | 0.22 | 0.54 |
| rRNA      | 5S-L113                    | 10.34 | 0.01  | 0.22 | 0.54 |
| piRNA     | piR-33382                  | 8.69  | -0.01 | 0.22 | 0.54 |
| mir-5p    | hsa-miR-199b-5p            | 2.97  | -0.01 | 0.22 | 0.54 |
| mir-5p    | hsa-miR-106b-5p            | 3.53  | -0.01 | 0.22 | 0.54 |
| scRNA     | BC200-L108                 | 2.02  | 0.01  | 0.22 | 0.55 |
| rRNA      | 5S-L1075                   | 3.11  | 0.01  | 0.22 | 0.55 |

|           |                     |       |       |      |      |
|-----------|---------------------|-------|-------|------|------|
| rRNA      | 5S-L946             | 9.07  | 0.01  | 0.22 | 0.55 |
| rRNA      | LSU-rRNA_Hsa-L159   | 2.57  | 0.01  | 0.22 | 0.55 |
| rRNA      | LSU-rRNA_Hsa-L161   | 1.84  | 0.01  | 0.22 | 0.55 |
| mir-5p3pn | hsa-miR-4472-L2     | 1.83  | 0.01  | 0.23 | 0.56 |
| tRNA      | chr13.tRNA5-GluTTC  | 8.98  | -0.01 | 0.23 | 0.56 |
| tRNA      | chr6.tRNA147-SerAGA | 8.22  | -0.01 | 0.23 | 0.56 |
| snRNA     | U4-L24              | 1.61  | -0.02 | 0.23 | 0.57 |
| rRNA      | SSU-rRNA_Hsa-L34    | 5.52  | 0.01  | 0.23 | 0.57 |
| mir-5p3pn | hsa-miR-410         | 1.74  | -0.02 | 0.23 | 0.57 |
| rRNA      | 5S-L731             | 1.51  | 0.01  | 0.23 | 0.57 |
| mir-5p    | hsa-miR-345-5p      | 2.70  | 0.01  | 0.23 | 0.57 |
| mir-5p3pn | hsa-miR-370         | 4.87  | -0.01 | 0.23 | 0.57 |
| scRNA     | HY4-L11             | 1.48  | -0.02 | 0.23 | 0.57 |
| snoRNA    | SNORD127            | 4.77  | -0.01 | 0.23 | 0.57 |
| rRNA      | 5S-L930             | 1.75  | 0.01  | 0.24 | 0.57 |
| mir-3p    | hsa-miR-3184-3p     | 11.60 | 0.00  | 0.24 | 0.58 |
| rRNA      | LSU-rRNA_Hsa-L278   | 2.72  | 0.01  | 0.24 | 0.58 |
| scRNA     | HY1-L223            | 6.19  | 0.01  | 0.24 | 0.58 |
| scRNA     | HY4-L3              | 2.42  | -0.01 | 0.24 | 0.58 |
| scRNA     | HY1-L57             | 2.78  | 0.01  | 0.24 | 0.58 |
| scRNA     | HY5-L9              | 1.40  | 0.01  | 0.24 | 0.58 |
| tRNA      | chr6.tRNA123-SerGCT | 2.23  | -0.01 | 0.24 | 0.58 |
| mir-5p    | hsa-miR-5010-5p     | 1.44  | -0.02 | 0.24 | 0.58 |
| rRNA      | LSU-rRNA_Hsa-L41    | 1.50  | -0.02 | 0.24 | 0.58 |
| mir-3p    | hsa-miR-29c-3p      | 1.99  | 0.01  | 0.24 | 0.58 |
| scRNA     | HY3-L199            | 1.72  | 0.01  | 0.25 | 0.59 |
| rRNA      | 5S-L107             | 10.07 | 0.01  | 0.25 | 0.59 |
| tRNA      | chr14.tRNA19-TyrGTA | 2.52  | 0.01  | 0.25 | 0.59 |
| piRNA     | piR-52416           | 1.72  | 0.01  | 0.25 | 0.59 |
| mir-5p3pn | hsa-miR-651         | 3.29  | -0.01 | 0.25 | 0.59 |
| mir-3p    | hsa-miR-185-3p      | 2.98  | -0.01 | 0.25 | 0.59 |
| mir-5p3pn | hsa-miR-494         | 1.75  | -0.01 | 0.25 | 0.59 |
| snoRNA    | HBI-43              | 3.60  | 0.01  | 0.25 | 0.59 |
| piRNA     | piR-33151-L9        | 3.44  | 0.01  | 0.25 | 0.59 |
| mir-5p    | hsa-miR-32-5p       | 3.62  | -0.01 | 0.25 | 0.59 |
| piRNA     | piR-51810-L2        | 8.21  | -0.01 | 0.25 | 0.59 |
| scRNA     | BC200-L9            | 2.83  | 0.01  | 0.25 | 0.59 |
| snoRNA    | U104                | 7.46  | -0.01 | 0.25 | 0.60 |
| mir-5p    | hsa-miR-625-5p      | 2.07  | -0.01 | 0.26 | 0.60 |
| mir-5p    | hsa-miR-199a-5p     | 6.35  | -0.01 | 0.26 | 0.60 |
| snoRNA    | ACA20               | 2.31  | -0.01 | 0.26 | 0.60 |
| tRNA      | chr2.tRNA2-TyrGTA   | 1.69  | 0.01  | 0.26 | 0.60 |
| mir-3p    | hsa-miR-502-3p      | 2.26  | -0.01 | 0.26 | 0.60 |

|        |                          |      |       |      |      |
|--------|--------------------------|------|-------|------|------|
| scRNA  | HY1-L155                 | 2.69 | 0.01  | 0.26 | 0.60 |
| mir-5p | hsa-miR-145-5p           | 1.80 | 0.01  | 0.26 | 0.60 |
| rRNA   | LSU-rRNA_Hsa-L333        | 4.08 | 0.01  | 0.26 | 0.60 |
| scRNA  | BC200-L69                | 1.44 | 0.01  | 0.26 | 0.60 |
| rRNA   | LSU-rRNA_Hsa-L295        | 3.46 | 0.01  | 0.26 | 0.60 |
| snRNA  | U1-L71                   | 5.05 | -0.01 | 0.26 | 0.60 |
| rRNA   | 5S-L955                  | 1.52 | -0.01 | 0.26 | 0.60 |
| scRNA  | BC200-L62                | 2.72 | 0.01  | 0.26 | 0.60 |
| snoRNA | U35A                     | 1.80 | 0.01  | 0.26 | 0.60 |
| tRNA   | chr1.tRNA38-LeuCAG       | 3.68 | 0.01  | 0.26 | 0.60 |
| snRNA  | U6-L1696                 | 1.91 | -0.01 | 0.27 | 0.61 |
| piRNA  | piR-52041                | 1.91 | 0.01  | 0.27 | 0.61 |
| scRNA  | BC200-L161               | 1.53 | 0.01  | 0.27 | 0.61 |
| snRNA  | U5-L67                   | 7.03 | 0.01  | 0.27 | 0.61 |
| rRNA   | 5S-L189                  | 2.24 | 0.01  | 0.27 | 0.61 |
| scRNA  | BC200-L60                | 2.38 | 0.01  | 0.27 | 0.61 |
| snoRNA | U32A                     | 4.08 | -0.01 | 0.27 | 0.61 |
| tRF5   | chr16.tRNA8-ProTGG-tRF5  | 2.11 | -0.01 | 0.27 | 0.61 |
| mir-5p | hsa-miR-4665-5p          | 1.60 | -0.02 | 0.27 | 0.61 |
| mir-3p | hsa-miR-99b-3p           | 3.54 | -0.01 | 0.27 | 0.61 |
| mir-3p | hsa-miR-652-3p           | 3.92 | -0.01 | 0.27 | 0.61 |
| tRNA   | chr2.tRNA25-PseudoCTC    | 8.69 | 0.00  | 0.27 | 0.61 |
| rRNA   | LSU-rRNA_Hsa-L266        | 3.17 | 0.01  | 0.27 | 0.61 |
| tRNA   | chr14.tRNA12-PseudoTTT   | 1.55 | 0.01  | 0.28 | 0.62 |
| tRF5   | chr6.tRNA109-PheGAA-tRF5 | 2.26 | 0.01  | 0.28 | 0.62 |
| rRNA   | LSU-rRNA_Hsa-L166        | 5.43 | 0.02  | 0.28 | 0.62 |
| snoRNA | U105                     | 2.35 | -0.01 | 0.28 | 0.62 |
| snRNA  | U1-L45                   | 6.78 | -0.01 | 0.28 | 0.62 |
| rRNA   | 5S-L819                  | 2.01 | 0.01  | 0.28 | 0.62 |
| scRNA  | HY1-L184                 | 3.77 | 0.01  | 0.28 | 0.63 |
| tRNA   | chr1.tRNA52-ProCGG       | 2.14 | 0.01  | 0.28 | 0.63 |
| mir-5p | hsa-miR-142-5p           | 5.73 | -0.01 | 0.28 | 0.63 |
| tRNA   | chr14.tRNA3-ProTGG       | 3.97 | -0.01 | 0.28 | 0.63 |
| rRNA   | LSU-rRNA_Hsa-L4          | 8.09 | -0.01 | 0.29 | 0.63 |
| snoRNA | U74                      | 5.78 | -0.01 | 0.29 | 0.63 |
| rRNA   | LSU-rRNA_Hsa-L249        | 7.95 | 0.01  | 0.29 | 0.63 |
| mir-5p | hsa-miR-3679-5p          | 2.94 | 0.01  | 0.29 | 0.63 |
| piRNA  | piR-38354                | 2.15 | 0.01  | 0.29 | 0.63 |
| rRNA   | LSU-rRNA_Hsa-L58         | 7.02 | 0.01  | 0.29 | 0.63 |
| snoRNA | ACA47                    | 3.23 | -0.01 | 0.29 | 0.63 |
| snoRNA | U16                      | 2.75 | -0.01 | 0.29 | 0.63 |
| snoRNA | ACA51                    | 2.14 | 0.01  | 0.29 | 0.63 |
| tRF5   | chr14.tRNA8-CysGCA-tRF5  | 2.18 | -0.01 | 0.29 | 0.63 |

|          |                         |       |       |      |      |
|----------|-------------------------|-------|-------|------|------|
| mir-5p   | hsa-miR-3605-5p         | 2.60  | 0.01  | 0.29 | 0.63 |
| mir-5p   | hsa-miR-99b-5p          | 6.89  | -0.01 | 0.29 | 0.63 |
| scRNA    | HY4-L70                 | 9.07  | 0.00  | 0.29 | 0.63 |
| mir-5p3p | hsa-miR-107             | 1.72  | -0.01 | 0.29 | 0.63 |
| snoRNA   | U62B                    | 3.72  | -0.01 | 0.29 | 0.63 |
| rRNA     | 5S-L515                 | 2.06  | 0.01  | 0.30 | 0.63 |
| scRNA    | BC200-L116              | 2.42  | 0.01  | 0.30 | 0.63 |
| snoRNA   | HBI-61                  | 3.49  | 0.01  | 0.30 | 0.63 |
| scRNA    | BC200-L88               | 1.65  | 0.01  | 0.30 | 0.63 |
| tRNA     | chr17.tRNA14-ThrCGT     | 1.87  | -0.01 | 0.30 | 0.64 |
| rRNA     | LSU-rRNA_Hsa-L193       | 7.16  | 0.01  | 0.30 | 0.64 |
| piRNA    | piR-34536               | 5.56  | -0.01 | 0.30 | 0.64 |
| scRNA    | HY3-L140                | 2.65  | 0.01  | 0.30 | 0.64 |
| mir-5p   | hsa-miR-30a-5p          | 7.14  | 0.00  | 0.30 | 0.64 |
| mir-5p   | hsa-miR-122-5p          | 9.88  | -0.01 | 0.30 | 0.64 |
| scRNA    | HY3-L478                | 8.12  | -0.01 | 0.30 | 0.64 |
| scRNA    | BC200-L7                | 2.61  | 0.01  | 0.30 | 0.64 |
| mir-5p3p | hsa-miR-134             | 6.74  | -0.01 | 0.30 | 0.64 |
| scRNA    | HY4-L132                | 2.50  | 0.01  | 0.30 | 0.64 |
| mir-3p   | hsa-miR-146b-3p         | 2.42  | -0.01 | 0.30 | 0.64 |
| scRNA    | HY1-L13                 | 2.51  | 0.01  | 0.30 | 0.64 |
| mir-3p   | hsa-miR-19b-3p          | 4.04  | -0.01 | 0.30 | 0.64 |
| rRNA     | 5S-L586                 | 2.14  | 0.01  | 0.31 | 0.64 |
| tRF3     | chr22.tRNA1-SeCTCA-tRF3 | 4.56  | 0.01  | 0.31 | 0.64 |
| snRNA    | U2-L302                 | 4.05  | 0.01  | 0.31 | 0.64 |
| mir-3p   | hsa-miR-4433-3p         | 2.78  | -0.01 | 0.31 | 0.64 |
| mir-5p   | hsa-miR-151a-5p         | 6.40  | -0.01 | 0.31 | 0.64 |
| scRNA    | BC200-L46               | 1.64  | 0.01  | 0.31 | 0.64 |
| mir-5p   | hsa-miR-409-5p          | 1.55  | -0.02 | 0.31 | 0.64 |
| mir-5p   | hsa-miR-339-5p          | 1.85  | -0.02 | 0.31 | 0.65 |
| rRNA     | 5S-L136                 | 1.53  | -0.01 | 0.31 | 0.65 |
| tRNA     | chrX.tRNA2-LeuTAA       | 1.38  | -0.01 | 0.31 | 0.65 |
| snoRNA   | U81                     | 6.27  | -0.01 | 0.31 | 0.65 |
| rRNA     | 5S-L1067                | 2.57  | 0.01  | 0.31 | 0.65 |
| scRNA    | HY1-L430                | 1.34  | -0.01 | 0.31 | 0.65 |
| mir-5p   | hsa-miR-301a-5p         | 1.39  | -0.01 | 0.31 | 0.65 |
| piRNA    | piR-38600               | 3.94  | -0.01 | 0.32 | 0.65 |
| tRNA     | chr16.tRNA22-MetCAT     | 3.03  | 0.01  | 0.32 | 0.65 |
| mir-5p   | hsa-miR-150-5p          | 5.10  | -0.01 | 0.32 | 0.65 |
| rRNA     | 5S-L112                 | 10.83 | 0.00  | 0.32 | 0.65 |
| snRNA    | U2-L550                 | 2.12  | 0.02  | 0.32 | 0.65 |
| scRNA    | HY1-L103                | 2.46  | -0.01 | 0.32 | 0.66 |
| tRNA     | chr6.tRNA84-GlnTTG      | 1.52  | 0.01  | 0.32 | 0.66 |

|        |                         |       |       |      |      |
|--------|-------------------------|-------|-------|------|------|
| snoRNA | U84                     | 2.10  | -0.01 | 0.32 | 0.66 |
| scRNA  | HY1-L391                | 14.88 | 0.00  | 0.32 | 0.66 |
| snoRNA | U37                     | 1.76  | -0.02 | 0.32 | 0.66 |
| snRNA  | U2-L388                 | 3.41  | 0.01  | 0.33 | 0.66 |
| snoRNA | U31                     | 7.96  | -0.01 | 0.33 | 0.66 |
| piRNA  | piR-61648-L7            | 4.08  | 0.01  | 0.33 | 0.67 |
| scRNA  | BC200-L43               | 3.28  | 0.01  | 0.33 | 0.67 |
| scRNA  | HY1-L100                | 8.91  | 0.00  | 0.33 | 0.67 |
| rRNA   | 5S-L303                 | 2.33  | -0.01 | 0.33 | 0.67 |
| snoRNA | mgU6-47                 | 1.72  | 0.01  | 0.33 | 0.67 |
| rRNA   | 5S-L1152                | 1.59  | 0.01  | 0.33 | 0.67 |
| scRNA  | HY4-L59                 | 4.56  | 0.00  | 0.34 | 0.68 |
| scRNA  | HY4                     | 10.16 | 0.00  | 0.34 | 0.68 |
| piRNA  | piR-60565-L9            | 1.88  | -0.01 | 0.34 | 0.68 |
| scRNA  | HY4-L92                 | 1.42  | 0.01  | 0.34 | 0.68 |
| mir-3p | hsa-miR-501-3p          | 4.83  | 0.00  | 0.34 | 0.68 |
| scRNA  | HY1-L25                 | 1.88  | 0.01  | 0.34 | 0.68 |
| tRF5   | chr6.tRNA56-PheGAA-tRF5 | 1.38  | 0.01  | 0.34 | 0.68 |
| snoRNA | HBII-239                | 4.71  | -0.01 | 0.34 | 0.69 |
| mir-3p | hsa-miR-629-3p          | 1.42  | 0.01  | 0.35 | 0.69 |
| tRNA   | chr16.tRNA31-PseudoTGG  | 3.01  | 0.01  | 0.35 | 0.69 |
| scRNA  | HY1-L191                | 3.51  | 0.01  | 0.35 | 0.69 |
| tRNA   | chr19.tRNA2-GlyTCC      | 4.14  | -0.01 | 0.35 | 0.69 |
| piRNA  | piR-62011               | 8.25  | 0.01  | 0.35 | 0.69 |
| scRNA  | HY4-L100                | 3.24  | 0.01  | 0.35 | 0.69 |
| scRNA  | HY1-L243                | 6.54  | 0.00  | 0.35 | 0.69 |
| tRNA   | chr11.tRNA8-SerGCT      | 4.09  | -0.01 | 0.35 | 0.69 |
| rRNA   | SSU-rRNA_Hsa-L16        | 6.78  | 0.01  | 0.35 | 0.69 |
| snRNA  | U1-L138                 | 3.38  | -0.01 | 0.35 | 0.69 |
| scRNA  | BC200-L159              | 1.51  | 0.01  | 0.35 | 0.69 |
| snRNA  | U13_-L44                | 1.56  | 0.01  | 0.36 | 0.70 |
| scRNA  | BC200-L24               | 2.86  | 0.01  | 0.36 | 0.70 |
| piRNA  | piR-41209-L2            | 3.73  | 0.01  | 0.36 | 0.70 |
| snRNA  | U5-L22                  | 1.98  | 0.01  | 0.36 | 0.70 |
| piRNA  | piR-34535               | 5.56  | -0.01 | 0.36 | 0.70 |
| mir-5p | hsa-miR-125b-5p-L2      | 3.27  | 0.01  | 0.36 | 0.70 |
| scRNA  | BC200-L126              | 3.33  | 0.01  | 0.36 | 0.70 |
| tRNA   | chr9.tRNA4-ArgTCT       | 1.63  | -0.01 | 0.36 | 0.70 |
| mir-3p | hsa-miR-19a-3p          | 4.16  | -0.01 | 0.36 | 0.70 |
| scRNA  | HY1-L3                  | 3.10  | 0.01  | 0.36 | 0.70 |
| scRNA  | HY1-L279                | 4.02  | 0.00  | 0.36 | 0.70 |
| rRNA   | 5S-L247                 | 1.53  | 0.01  | 0.36 | 0.70 |
| snoRNA | U52                     | 2.73  | -0.01 | 0.36 | 0.70 |



|           |                           |      |       |      |      |
|-----------|---------------------------|------|-------|------|------|
| scRNA     | HY4-L12                   | 5.27 | 0.00  | 0.36 | 0.70 |
| mir-5p    | hsa-miR-450a-5p           | 3.31 | -0.01 | 0.36 | 0.70 |
| scRNA     | HY4-L47                   | 2.67 | -0.01 | 0.36 | 0.70 |
| mir-3p    | hsa-miR-323b-3p           | 3.62 | -0.01 | 0.36 | 0.70 |
| piRNA     | piR-31115-L2              | 6.67 | 0.00  | 0.37 | 0.70 |
| snRNA     | U1-L39                    | 1.74 | -0.01 | 0.37 | 0.70 |
| mir-3p    | hsa-miR-15b-3p            | 3.61 | -0.01 | 0.37 | 0.70 |
| mir-5p3pn | hsa-miR-133a              | 1.56 | -0.02 | 0.37 | 0.70 |
| scRNA     | HY1-L419                  | 3.95 | 0.00  | 0.37 | 0.70 |
| mir-3p    | hsa-miR-132-3p            | 1.92 | -0.01 | 0.37 | 0.70 |
| tRNA      | chr13.tRNA4-GluCTC        | 2.04 | -0.01 | 0.37 | 0.70 |
| rRNA      | SSU-rRNA_Hsa-L3           | 1.28 | 0.01  | 0.37 | 0.70 |
| tRF5      | chr3.tRNA9-PseudoTTG-tRF5 | 1.99 | -0.01 | 0.37 | 0.70 |
| snRNA     | U6-L1308                  | 2.67 | -0.01 | 0.37 | 0.70 |
| scRNA     | BC200-L49                 | 4.36 | 0.01  | 0.37 | 0.70 |
| mir-3p    | hsa-miR-671-3p            | 4.05 | -0.01 | 0.37 | 0.70 |
| piRNA     | piR-36742                 | 5.16 | -0.01 | 0.37 | 0.70 |
| piRNA     | piR-37213                 | 1.60 | 0.01  | 0.37 | 0.70 |
| mir-3p    | hsa-miR-2115-3p           | 1.61 | 0.01  | 0.37 | 0.70 |
| tRNA      | chr17.tRNA16-GlnTTG       | 2.36 | 0.01  | 0.38 | 0.71 |
| tRF3      | chr16.tRNA11-ProAGG-tRF3  | 1.80 | -0.01 | 0.38 | 0.71 |
| mir-5p    | hsa-miR-140-5p            | 4.20 | -0.01 | 0.38 | 0.71 |
| mir-5p    | hsa-miR-3613-5p           | 4.64 | -0.01 | 0.38 | 0.71 |
| scRNA     | HY3-L382                  | 1.28 | -0.01 | 0.38 | 0.71 |
| scRNA     | HY4-L54                   | 6.72 | 0.00  | 0.38 | 0.71 |
| tRNA      | chr1.tRNA60-PseudoTAA     | 3.73 | -0.01 | 0.38 | 0.71 |
| mir-3p    | hsa-miR-3613-3p           | 1.73 | 0.01  | 0.38 | 0.71 |
| rRNA      | 5S-L389                   | 1.35 | 0.01  | 0.38 | 0.71 |
| mir-5p3pn | hsa-miR-484               | 6.24 | 0.01  | 0.38 | 0.71 |
| tRNA      | chr15.tRNA2-LysCTT        | 6.59 | 0.00  | 0.38 | 0.71 |
| snoRNA    | U21                       | 4.61 | -0.01 | 0.38 | 0.71 |
| snRNA     | U4-L41                    | 2.29 | 0.01  | 0.38 | 0.71 |
| scRNA     | HY4-L150                  | 3.26 | 0.01  | 0.38 | 0.71 |
| mir-5p    | hsa-miR-192-5p            | 8.24 | 0.00  | 0.38 | 0.71 |
| snRNA     | U14-L5                    | 4.25 | -0.01 | 0.39 | 0.71 |
| rRNA      | 5S-L627                   | 1.59 | -0.01 | 0.39 | 0.71 |
| scRNA     | HY4-L87                   | 9.96 | 0.00  | 0.39 | 0.71 |
| snoRNA    | U85                       | 3.06 | 0.01  | 0.39 | 0.71 |
| tRF5      | chr1.tRNA90-ValCAC-tRF5   | 2.14 | 0.01  | 0.39 | 0.71 |
| tRNA      | chr6.tRNA131-GlnCTG       | 1.62 | 0.01  | 0.39 | 0.71 |
| scRNA     | HY1-L239                  | 4.37 | 0.00  | 0.39 | 0.71 |
| scRNA     | HY4-L136                  | 2.51 | -0.01 | 0.39 | 0.71 |
| mir-5p    | hsa-miR-1292-5p           | 1.70 | -0.01 | 0.39 | 0.71 |

|           |                          |       |       |      |      |
|-----------|--------------------------|-------|-------|------|------|
| tRF5      | chr4.tRNA3-CysGCA-tRF5   | 1.61  | -0.01 | 0.39 | 0.71 |
| scRNA     | HY4-L127                 | 11.00 | 0.00  | 0.39 | 0.71 |
| scRNA     | HY4-L96                  | 3.68  | 0.00  | 0.39 | 0.71 |
| scRNA     | HY4-L35                  | 7.15  | 0.00  | 0.39 | 0.71 |
| piRNA     | piR-44984-L6             | 2.43  | -0.01 | 0.39 | 0.71 |
| snRNA     | U5-L3                    | 2.02  | -0.01 | 0.39 | 0.71 |
| snRNA     | U1-L78                   | 1.40  | -0.01 | 0.39 | 0.71 |
| tRNA      | chr1.tRNA54-LysTTT       | 8.24  | -0.01 | 0.40 | 0.71 |
| scRNA     | HY4-L116                 | 3.88  | -0.01 | 0.40 | 0.71 |
| mir-3p    | hsa-miR-708-3p           | 1.51  | 0.01  | 0.40 | 0.71 |
| scRNA     | HY1-L292                 | 5.48  | 0.00  | 0.40 | 0.71 |
| snoRNA    | HBII-420                 | 4.25  | -0.01 | 0.40 | 0.71 |
| scRNA     | HY3-L120                 | 2.34  | -0.01 | 0.40 | 0.71 |
| tRNA      | chr1.tRNA5-GluTTC        | 5.89  | -0.01 | 0.40 | 0.71 |
| rRNA      | LSU-rRNA_Hsa-L252        | 2.98  | 0.01  | 0.40 | 0.71 |
| mir-5p3pn | hsa-miR-95               | 2.72  | -0.01 | 0.40 | 0.71 |
| snoRNA    | U45C                     | 2.62  | -0.01 | 0.40 | 0.71 |
| scRNA     | HY1-L418                 | 1.64  | -0.01 | 0.40 | 0.71 |
| rRNA      | LSU-rRNA_Hsa-L381        | 2.74  | 0.01  | 0.40 | 0.71 |
| scRNA     | HY4-L38                  | 4.19  | -0.01 | 0.40 | 0.71 |
| snoRNA    | HBII-166                 | 3.05  | -0.01 | 0.40 | 0.71 |
| scRNA     | HY1-L443                 | 7.16  | 0.00  | 0.40 | 0.71 |
| rRNA      | LSU-rRNA_Hsa-L230        | 3.37  | 0.01  | 0.40 | 0.71 |
| tRNA      | chr6.tRNA138-ArgACG      | 1.66  | 0.01  | 0.40 | 0.71 |
| scRNA     | BC200-L29                | 2.92  | 0.01  | 0.40 | 0.71 |
| mir-3p    | hsa-miR-195-3p           | 1.91  | 0.01  | 0.40 | 0.71 |
| mir-5p3pn | hsa-miR-320c             | 4.43  | 0.00  | 0.40 | 0.71 |
| mir-3p    | hsa-miR-144-3p           | 5.77  | 0.01  | 0.40 | 0.71 |
| tRF5      | chr6.tRNA129-MetCAT-tRF5 | 2.00  | 0.01  | 0.40 | 0.71 |
| scRNA     | HY3-L492                 | 1.46  | 0.01  | 0.41 | 0.72 |
| snoRNA    | HBII-85-3                | 2.58  | -0.01 | 0.41 | 0.72 |
| rRNA      | LSU-rRNA_Hsa-L39         | 7.57  | 0.00  | 0.41 | 0.72 |
| scRNA     | HY1-L434                 | 6.45  | 0.00  | 0.41 | 0.72 |
| piRNA     | piR-60577-L3             | 7.08  | 0.00  | 0.41 | 0.72 |
| mir-3p    | hsa-miR-330-3p           | 3.77  | -0.01 | 0.41 | 0.72 |
| snRNA     | U1-L33                   | 2.56  | 0.01  | 0.41 | 0.72 |
| scRNA     | HY4-L71                  | 5.97  | 0.00  | 0.41 | 0.72 |
| snoRNA    | HBII-289                 | 7.18  | 0.00  | 0.41 | 0.72 |
| tRNA      | chr7.tRNA8-CysGCA        | 1.87  | 0.01  | 0.41 | 0.72 |
| scRNA     | HY3-L372                 | 2.47  | 0.01  | 0.41 | 0.72 |
| tRNA      | chr17.tRNA41-SerCGA      | 2.37  | -0.01 | 0.41 | 0.72 |
| rRNA      | 5S-L746                  | 2.21  | -0.01 | 0.42 | 0.72 |
| scRNA     | HY4-L15                  | 7.92  | 0.00  | 0.42 | 0.72 |

|        |                        |       |       |      |      |
|--------|------------------------|-------|-------|------|------|
| snoRNA | U63                    | 5.92  | -0.01 | 0.42 | 0.72 |
| scRNA  | BC200-L72              | 1.58  | -0.01 | 0.42 | 0.72 |
| snoRNA | U27                    | 4.90  | 0.01  | 0.42 | 0.72 |
| snoRNA | U48                    | 5.72  | -0.01 | 0.42 | 0.72 |
| tRNA   | chr1.tRNA137-Pseudo??? | 6.02  | -0.01 | 0.42 | 0.72 |
| snRNA  | U1-L47                 | 1.98  | 0.01  | 0.42 | 0.72 |
| mir-3p | hsa-miR-23a-3p         | 6.59  | 0.00  | 0.42 | 0.72 |
| rRNA   | 5S-L758                | 2.59  | 0.01  | 0.42 | 0.72 |
| tRNA   | chr1.tRNA18-PseudoCCT  | 1.66  | 0.01  | 0.42 | 0.72 |
| tRNA   | chr14.tRNA23-ProAGG    | 2.14  | -0.01 | 0.42 | 0.72 |
| snoRNA | ACA8                   | 2.21  | -0.01 | 0.42 | 0.72 |
| snRNA  | U14-L3                 | 1.49  | -0.01 | 0.42 | 0.72 |
| rRNA   | LSU-rRNA_Hsa-L360      | 1.84  | 0.01  | 0.42 | 0.73 |
| mir-3p | hsa-miR-374b-3p        | 2.49  | 0.01  | 0.42 | 0.73 |
| rRNA   | 5S-L253                | 3.20  | 0.00  | 0.43 | 0.73 |
| snoRNA | U18A                   | 6.81  | -0.01 | 0.43 | 0.73 |
| scRNA  | HY4-L98                | 9.97  | 0.00  | 0.43 | 0.73 |
| scRNA  | HY4-L151               | 2.39  | 0.01  | 0.43 | 0.73 |
| snoRNA | U24                    | 2.09  | 0.01  | 0.43 | 0.73 |
| snoRNA | U92                    | 2.16  | -0.01 | 0.43 | 0.73 |
| scRNA  | HY1-L295               | 4.37  | 0.00  | 0.43 | 0.73 |
| mir-5p | hsa-let-7e-5p          | 5.52  | 0.00  | 0.43 | 0.73 |
| mir-3p | hsa-miR-222-3p         | 8.33  | 0.00  | 0.43 | 0.73 |
| snRNA  | U2-L481                | 1.44  | -0.01 | 0.43 | 0.73 |
| snRNA  | U1-L43                 | 1.94  | 0.01  | 0.43 | 0.73 |
| mir-3p | hsa-miR-29a-3p         | 5.96  | 0.00  | 0.43 | 0.73 |
| mir-5p | hsa-miR-27a-5p         | 4.98  | 0.00  | 0.43 | 0.73 |
| rRNA   | 5S-L1214               | 1.33  | 0.01  | 0.43 | 0.73 |
| mir-5p | hsa-miR-22-5p          | 3.80  | -0.01 | 0.43 | 0.73 |
| snRNA  | U3-L4                  | 1.56  | -0.01 | 0.44 | 0.73 |
| rRNA   | 5S-L877                | 2.33  | 0.01  | 0.44 | 0.73 |
| snoRNA | ACA21                  | 2.76  | -0.01 | 0.44 | 0.73 |
| piRNA  | piR-33404              | 6.30  | -0.01 | 0.44 | 0.73 |
| mir-5p | hsa-miR-486-5p         | 13.44 | 0.00  | 0.44 | 0.73 |
| rRNA   | 5S-L21                 | 2.71  | 0.01  | 0.44 | 0.73 |
| mir-5p | hsa-miR-25-5p          | 2.07  | -0.01 | 0.44 | 0.73 |
| scRNA  | HY4-L93                | 3.97  | 0.00  | 0.44 | 0.73 |
| scRNA  | HY1-L114               | 3.94  | 0.01  | 0.44 | 0.73 |
| mir-5p | hsa-miR-183-5p         | 7.53  | 0.00  | 0.44 | 0.73 |
| scRNA  | HY4-L138               | 8.42  | 0.00  | 0.44 | 0.73 |
| snoRNA | HBII-85-15             | 1.65  | -0.01 | 0.44 | 0.73 |
| rRNA   | 5S-L1071               | 1.54  | 0.01  | 0.44 | 0.73 |
| mir-5p | hsa-miR-629-5p         | 7.76  | 0.00  | 0.44 | 0.73 |

|           |                         |       |       |      |      |
|-----------|-------------------------|-------|-------|------|------|
| rRNA      | 5S-L191                 | 4.70  | 0.00  | 0.45 | 0.73 |
| scRNA     | HY4-L10                 | 10.20 | 0.00  | 0.45 | 0.73 |
| scRNA     | BC200-L32               | 2.06  | 0.01  | 0.45 | 0.73 |
| scRNA     | HY4-L102                | 8.16  | 0.00  | 0.45 | 0.73 |
| mir-3p    | hsa-miR-4732-3p         | 2.44  | 0.01  | 0.45 | 0.73 |
| mir-3p    | hsa-miR-4742-3p         | 1.43  | 0.01  | 0.45 | 0.73 |
| mir-5p    | hsa-let-7b-5p           | 12.45 | 0.00  | 0.45 | 0.73 |
| scRNA     | BC200-L114              | 2.21  | 0.01  | 0.45 | 0.74 |
| scRNA     | HY4-L130                | 14.43 | 0.00  | 0.45 | 0.74 |
| rRNA      | 5S-L990                 | 3.08  | 0.00  | 0.45 | 0.74 |
| snoRNA    | U106                    | 1.86  | -0.01 | 0.45 | 0.74 |
| snoRNA    | snR38B                  | 3.27  | -0.01 | 0.45 | 0.74 |
| rRNA      | LSU-rRNA_Hsa-L43        | 1.53  | 0.01  | 0.45 | 0.74 |
| tRNA      | chr2.tRNA14-TyrATA      | 3.30  | -0.01 | 0.45 | 0.74 |
| mir-5p    | hsa-miR-194-5p          | 4.47  | 0.00  | 0.45 | 0.74 |
| snoRNA    | U96a                    | 3.47  | -0.01 | 0.46 | 0.74 |
| snoRNA    | ACA46                   | 2.21  | 0.01  | 0.46 | 0.74 |
| scRNA     | HY1-L276                | 3.15  | 0.00  | 0.46 | 0.74 |
| scRNA     | BC200-L38               | 1.58  | -0.01 | 0.46 | 0.74 |
| scRNA     | HY4-L135                | 18.67 | 0.00  | 0.46 | 0.74 |
| scRNA     | HY1-L321                | 4.61  | 0.00  | 0.46 | 0.74 |
| rRNA      | 5S-L558                 | 7.28  | 0.00  | 0.46 | 0.74 |
| mir-3p    | hsa-miR-16-2-3p         | 7.97  | 0.00  | 0.46 | 0.75 |
| mir-3p    | hsa-miR-486-3p          | 10.93 | 0.00  | 0.46 | 0.75 |
| mir-3p    | hsa-miR-125a-3p         | 3.83  | 0.01  | 0.47 | 0.75 |
| snoRNA    | U64                     | 2.08  | -0.01 | 0.47 | 0.75 |
| rRNA      | 5S-L78                  | 2.70  | 0.01  | 0.47 | 0.75 |
| mir-5p    | hsa-miR-642b-5p         | 1.56  | 0.01  | 0.47 | 0.75 |
| mir-5p3pn | hsa-miR-215             | 3.83  | -0.01 | 0.47 | 0.75 |
| mir-5p    | hsa-miR-766-5p          | 1.81  | -0.01 | 0.47 | 0.75 |
| scRNA     | HY1-L435                | 3.49  | 0.00  | 0.47 | 0.75 |
| snoRNA    | ACA3                    | 2.48  | 0.01  | 0.47 | 0.75 |
| mir-5p    | hsa-miR-27b-5p          | 1.72  | -0.01 | 0.47 | 0.75 |
| rRNA      | LSU-rRNA_Hsa-L66        | 1.86  | -0.01 | 0.47 | 0.75 |
| mir-5p3pn | hsa-miR-3672            | 1.53  | -0.01 | 0.47 | 0.75 |
| scRNA     | HY4-L107                | 9.96  | 0.00  | 0.47 | 0.75 |
| piRNA     | piR-30112               | 2.68  | -0.01 | 0.47 | 0.75 |
| mir-5p    | hsa-miR-1304-5p         | 1.47  | -0.01 | 0.48 | 0.75 |
| rRNA      | 5S-L782                 | 3.63  | 0.00  | 0.48 | 0.75 |
| scRNA     | HY1-L247                | 1.49  | 0.01  | 0.48 | 0.76 |
| tRF5      | chr8.tRNA12-TyrGTA-tRF5 | 2.21  | 0.01  | 0.48 | 0.76 |
| mir-5p    | hsa-miR-132-5p          | 2.49  | -0.01 | 0.48 | 0.76 |
| scRNA     | HY4-L122                | 7.82  | 0.00  | 0.48 | 0.76 |

|          |                            |       |       |      |      |
|----------|----------------------------|-------|-------|------|------|
| snoRNA   | U46                        | 4.48  | -0.01 | 0.48 | 0.76 |
| scRNA    | HY4-L17                    | 10.67 | 0.00  | 0.48 | 0.76 |
| rRNA     | LSU-rRNA_Hsa-L257          | 4.58  | 0.01  | 0.48 | 0.76 |
| snoRNA   | U53                        | 2.71  | 0.01  | 0.48 | 0.76 |
| piRNA    | piR-34041                  | 4.17  | -0.01 | 0.48 | 0.76 |
| snoRNA   | ACA3-2                     | 2.59  | -0.01 | 0.49 | 0.76 |
| tRF5     | chr18.tRNA3-PseudoTCC-tRF5 | 1.35  | 0.01  | 0.49 | 0.76 |
| snoRNA   | U60                        | 4.22  | -0.01 | 0.49 | 0.76 |
| scRNA    | BC200-L134                 | 1.43  | 0.01  | 0.49 | 0.76 |
| mir-3p   | hsa-miR-500a-3p            | 3.33  | 0.00  | 0.49 | 0.76 |
| snoRNA   | ACA11                      | 2.12  | -0.01 | 0.49 | 0.76 |
| tRNA     | chr14.tRNA7-ArgACG         | 1.75  | 0.01  | 0.49 | 0.76 |
| scRNA    | HY4-L111                   | 9.50  | 0.00  | 0.49 | 0.76 |
| snRNA    | U7-L159                    | 1.62  | 0.01  | 0.49 | 0.76 |
| snoRNA   | snR39B                     | 5.72  | 0.00  | 0.49 | 0.77 |
| mir-3p   | hsa-miR-378a-3p            | 8.57  | 0.00  | 0.49 | 0.77 |
| mir-5p   | hsa-miR-26b-5p             | 8.15  | 0.00  | 0.49 | 0.77 |
| rRNA     | 5S-L1143                   | 1.64  | 0.01  | 0.50 | 0.77 |
| piRNA    | piR-39361                  | 2.73  | 0.01  | 0.50 | 0.77 |
| snoRNA   | U51                        | 2.71  | -0.01 | 0.50 | 0.77 |
| snoRNA   | mgh28S-2409                | 3.15  | -0.01 | 0.50 | 0.77 |
| scRNA    | HY4-L72                    | 7.28  | 0.00  | 0.50 | 0.77 |
| mir-5p3p | hsa-miR-3909               | 1.71  | -0.01 | 0.50 | 0.77 |
| scRNA    | HY4-L14                    | 8.84  | 0.00  | 0.50 | 0.77 |
| scRNA    | HY1-L149                   | 3.78  | 0.00  | 0.50 | 0.77 |
| scRNA    | HY1-L439                   | 2.44  | 0.00  | 0.50 | 0.77 |
| tRNA     | chr6.tRNA153-IleAAT        | 1.68  | -0.01 | 0.50 | 0.77 |
| mir-5p   | hsa-miR-186-5p             | 6.23  | 0.00  | 0.50 | 0.77 |
| mir-5p   | hsa-miR-26a-5p-L2          | 10.75 | 0.00  | 0.50 | 0.77 |
| rRNA     | 5S-L804                    | 4.97  | 0.00  | 0.50 | 0.77 |
| mir-3p   | hsa-miR-10b-3p             | 1.70  | 0.01  | 0.50 | 0.77 |
| snRNA    | U6-L503                    | 1.31  | 0.01  | 0.50 | 0.77 |
| tRNA     | chr8.tRNA5-TyrGTA          | 1.91  | 0.01  | 0.51 | 0.77 |
| tRNA     | chr1.tRNA134-GluTTC        | 7.45  | 0.00  | 0.51 | 0.77 |
| scRNA    | HY4-L120                   | 9.92  | 0.00  | 0.51 | 0.77 |
| tRF5     | chrX.tRNA1-PseudoTTG-tRF5  | 2.77  | -0.01 | 0.51 | 0.77 |
| scRNA    | HY4-L49                    | 1.27  | 0.01  | 0.51 | 0.77 |
| mir-5p   | hsa-miR-1255b-5p-L2        | 1.62  | -0.01 | 0.51 | 0.77 |
| scRNA    | HY3-L518                   | 8.30  | 0.00  | 0.51 | 0.78 |
| piRNA    | piR-33468                  | 1.61  | 0.01  | 0.51 | 0.78 |
| tRNA     | chr6.tRNA66-AlaTGC         | 1.95  | -0.01 | 0.51 | 0.78 |
| scRNA    | HY3-L35                    | 2.20  | -0.01 | 0.51 | 0.78 |
| scRNA    | HY1-L300                   | 2.19  | 0.00  | 0.51 | 0.78 |

|           |                            |       |       |      |      |
|-----------|----------------------------|-------|-------|------|------|
| snRNA     | U5-L133                    | 2.24  | -0.01 | 0.51 | 0.78 |
| mir-5p3pn | hsa-miR-1287               | 1.87  | -0.01 | 0.52 | 0.78 |
| scRNA     | HY3-L524                   | 1.56  | 0.01  | 0.52 | 0.78 |
| mir-5p    | hsa-miR-10b-5p             | 10.26 | 0.00  | 0.52 | 0.78 |
| snRNA     | U17-L2                     | 2.12  | -0.01 | 0.52 | 0.78 |
| rRNA      | 5S-L1091                   | 1.37  | -0.01 | 0.52 | 0.78 |
| mir-5p    | hsa-miR-423-5p             | 3.96  | 0.00  | 0.52 | 0.78 |
| scRNA     | BC200-L20                  | 1.94  | 0.01  | 0.52 | 0.78 |
| piRNA     | piR-34804                  | 4.98  | 0.00  | 0.52 | 0.78 |
| mir-3p    | hsa-miR-423-3p             | 8.89  | 0.00  | 0.52 | 0.78 |
| mir-5p3pn | hsa-miR-4488               | 1.35  | 0.01  | 0.53 | 0.79 |
| mir-3p    | hsa-miR-539-3p             | 1.61  | -0.01 | 0.53 | 0.79 |
| piRNA     | piR-41209                  | 2.58  | 0.00  | 0.53 | 0.79 |
| snRNA     | U2-L63                     | 2.16  | 0.01  | 0.53 | 0.79 |
| rRNA      | 5S-L1255                   | 1.70  | 0.01  | 0.53 | 0.79 |
| scRNA     | HY3-L359                   | 1.92  | 0.01  | 0.53 | 0.79 |
| tRNA      | chr6.tRNA36-ArgACG         | 1.39  | -0.01 | 0.53 | 0.79 |
| piRNA     | piR-33468-L4               | 2.35  | 0.00  | 0.54 | 0.79 |
| piRNA     | piR-33082-L2               | 1.79  | 0.01  | 0.54 | 0.79 |
| snoRNA    | U105B                      | 4.75  | -0.01 | 0.54 | 0.79 |
| mir-3p    | hsa-miR-130b-3p            | 2.46  | 0.00  | 0.54 | 0.79 |
| piRNA     | piR-49145                  | 2.41  | -0.01 | 0.54 | 0.79 |
| snoRNA    | U26                        | 8.56  | 0.00  | 0.54 | 0.79 |
| scRNA     | HY4-L28                    | 6.48  | 0.00  | 0.54 | 0.79 |
| mir-3p    | hsa-miR-339-3p             | 2.88  | 0.00  | 0.54 | 0.79 |
| tRNA      | chr7.tRNA21-CysGCA         | 1.68  | -0.01 | 0.54 | 0.79 |
| mir-5p3pn | hsa-miR-6073               | 1.45  | 0.01  | 0.54 | 0.79 |
| piRNA     | piR-33160                  | 1.68  | 0.01  | 0.54 | 0.79 |
| rRNA      | LSU-rRNA_Hsa-L221          | 2.74  | 0.01  | 0.54 | 0.79 |
| scRNA     | HY4-L43                    | 2.22  | 0.00  | 0.54 | 0.79 |
| rRNA      | LSU-rRNA_Hsa-L304          | 2.50  | 0.01  | 0.54 | 0.80 |
| mir-5p3pn | hsa-miR-433                | 3.46  | -0.01 | 0.54 | 0.80 |
| rRNA      | LSU-rRNA_Hsa-L300          | 7.63  | -0.01 | 0.55 | 0.80 |
| mir-5p    | hsa-miR-660-5p             | 3.50  | 0.00  | 0.55 | 0.80 |
| piRNA     | piR-35413-L2               | 1.56  | 0.01  | 0.55 | 0.80 |
| scRNA     | HY1-L78                    | 1.39  | -0.01 | 0.55 | 0.80 |
| scRNA     | BC200-L96                  | 5.30  | 0.00  | 0.55 | 0.80 |
| tRF3      | chr15.tRNA6-PseudoCTT-tRF3 | 2.01  | -0.01 | 0.55 | 0.80 |
| tRNA      | chr6.tRNA122-PseudoTGC     | 2.61  | 0.01  | 0.55 | 0.80 |
| rRNA      | 5S-L61                     | 2.67  | 0.00  | 0.55 | 0.80 |
| rRNA      | LSU-rRNA_Hsa-L188          | 1.83  | -0.01 | 0.55 | 0.80 |
| snoRNA    | U79                        | 1.72  | -0.01 | 0.55 | 0.80 |
| mir-5p3pn | hsa-miR-4473               | 1.39  | -0.01 | 0.56 | 0.80 |

|          |                            |      |       |      |      |
|----------|----------------------------|------|-------|------|------|
| mir-3p   | hsa-miR-576-3p             | 4.04 | 0.00  | 0.56 | 0.80 |
| mir-5p   | hsa-miR-28-5p              | 5.11 | 0.00  | 0.56 | 0.80 |
| scRNA    | HY4-L32                    | 3.65 | 0.00  | 0.56 | 0.80 |
| rRNA     | 5S-L1144                   | 1.38 | -0.01 | 0.56 | 0.80 |
| scRNA    | HY4-L142                   | 3.10 | 0.00  | 0.56 | 0.80 |
| snoRNA   | U49A                       | 7.52 | 0.00  | 0.56 | 0.80 |
| snoRNA   | U76                        | 2.36 | 0.01  | 0.56 | 0.80 |
| scRNA    | HY1-L167                   | 2.48 | 0.01  | 0.56 | 0.80 |
| piRNA    | piR-43771-L6               | 2.91 | -0.01 | 0.56 | 0.80 |
| scRNA    | HY3-L512                   | 2.06 | 0.01  | 0.56 | 0.80 |
| tRNA     | chr6.tRNA63-IleTAT         | 1.53 | 0.01  | 0.56 | 0.80 |
| snRNA    | U3-L79                     | 3.27 | 0.00  | 0.56 | 0.80 |
| mir-5p3p | hsa-miR-1284               | 1.70 | 0.01  | 0.57 | 0.81 |
| piRNA    | piR-36741-L2               | 1.62 | -0.01 | 0.57 | 0.81 |
| rRNA     | LSU-rRNA_Hsa-L178          | 3.24 | 0.01  | 0.57 | 0.81 |
| mir-5p   | hsa-let-7a-5p              | 2.01 | -0.01 | 0.57 | 0.81 |
| mir-5p   | hsa-miR-550a-5p-L2         | 3.39 | 0.00  | 0.57 | 0.81 |
| scRNA    | HY4-L69                    | 9.89 | 0.00  | 0.57 | 0.81 |
| snoRNA   | U59A                       | 6.70 | -0.01 | 0.57 | 0.81 |
| rRNA     | 5S-L1178                   | 1.52 | -0.01 | 0.57 | 0.81 |
| mir-5p   | hsa-miR-548ay-5p           | 2.18 | 0.01  | 0.57 | 0.81 |
| tRNA     | chr16.tRNA29-ProAGG        | 2.96 | 0.00  | 0.57 | 0.81 |
| mir-3p   | hsa-miR-499b-3p            | 3.25 | 0.01  | 0.57 | 0.81 |
| scRNA    | HY3-L479                   | 2.10 | -0.01 | 0.57 | 0.81 |
| scRNA    | HY1-L356                   | 4.04 | 0.00  | 0.57 | 0.81 |
| scRNA    | HY4-L154                   | 1.53 | -0.01 | 0.57 | 0.81 |
| snoRNA   | mgh28S-2411                | 6.56 | 0.00  | 0.57 | 0.81 |
| tRNA     | chr2.tRNA27-GlyCCC         | 8.80 | 0.00  | 0.58 | 0.81 |
| tRF3     | chr12.tRNA7-AspGTC-tRF3    | 1.65 | -0.01 | 0.58 | 0.81 |
| mir-5p   | hsa-miR-106a-5p            | 2.83 | 0.00  | 0.58 | 0.81 |
| rRNA     | 5S-L99                     | 8.58 | 0.00  | 0.58 | 0.81 |
| snoRNA   | U55                        | 5.84 | -0.01 | 0.58 | 0.81 |
| mir-3p   | hsa-let-7d-3p              | 6.61 | 0.00  | 0.58 | 0.81 |
| scRNA    | HY1-L121                   | 2.71 | 0.00  | 0.58 | 0.81 |
| rRNA     | LSU-rRNA_Hsa-L308          | 1.76 | 0.01  | 0.58 | 0.81 |
| mir-5p   | hsa-miR-30e-5p             | 8.13 | 0.00  | 0.58 | 0.81 |
| piRNA    | piR-31038                  | 9.22 | 0.00  | 0.58 | 0.82 |
| mir-5p   | hsa-miR-7-5p-L3            | 1.44 | 0.01  | 0.59 | 0.82 |
| scRNA    | HY1-L212                   | 2.69 | 0.00  | 0.59 | 0.82 |
| tRF3     | chr20.tRNA4-PseudoTAA-tRF3 | 4.75 | 0.00  | 0.59 | 0.82 |
| scRNA    | HY4-L160                   | 7.28 | 0.00  | 0.59 | 0.82 |
| mir-5p   | hsa-miR-24-2-5p            | 4.12 | 0.00  | 0.59 | 0.82 |
| snRNA    | U1-L17                     | 1.83 | -0.01 | 0.59 | 0.82 |

|           |                            |       |       |      |      |
|-----------|----------------------------|-------|-------|------|------|
| scRNA     | HY1-L259                   | 5.48  | 0.00  | 0.59 | 0.82 |
| scRNA     | HY3-L142                   | 1.70  | 0.01  | 0.59 | 0.82 |
| mir-3p    | hsa-miR-3177-3p            | 1.68  | 0.01  | 0.59 | 0.82 |
| rRNA      | 5S-L102                    | 7.36  | 0.00  | 0.59 | 0.82 |
| tRNA      | chr1.tRNA81-AspGTC         | 4.35  | 0.00  | 0.60 | 0.82 |
| scRNA     | HY1-L277                   | 3.60  | 0.00  | 0.60 | 0.82 |
| tRNA      | chr6.tRNA98-LeuAAG         | 2.93  | -0.01 | 0.60 | 0.82 |
| scRNA     | HY4-L53                    | 3.75  | 0.00  | 0.60 | 0.82 |
| rRNA      | LSU-rRNA_Hsa-L165          | 7.53  | 0.00  | 0.60 | 0.82 |
| snRNA     | U7-L207                    | 2.19  | -0.01 | 0.60 | 0.82 |
| mir-5p    | hsa-miR-877-5p             | 2.35  | -0.01 | 0.60 | 0.82 |
| snRNA     | U2-L1001                   | 2.25  | 0.00  | 0.60 | 0.82 |
| mir-5p3pn | hsa-miR-326                | 1.98  | -0.01 | 0.60 | 0.82 |
| rRNA      | 5S-L621                    | 1.23  | -0.01 | 0.60 | 0.82 |
| scRNA     | HY4-L68                    | 4.03  | 0.00  | 0.60 | 0.82 |
| scRNA     | BC200-L91                  | 1.97  | 0.01  | 0.60 | 0.82 |
| scRNA     | HY3-L196                   | 1.85  | 0.00  | 0.60 | 0.82 |
| piRNA     | piR-32678-L3               | 10.98 | 0.00  | 0.60 | 0.82 |
| rRNA      | 5S-L317                    | 1.26  | 0.01  | 0.60 | 0.82 |
| tRF3      | chr17.tRNA33-PseudoTTG-tRF | 4.41  | 0.00  | 0.60 | 0.82 |
| rRNA      | LSU-rRNA_Hsa-L139          | 14.15 | 0.00  | 0.61 | 0.82 |
| mir-5p3pn | hsa-miR-548k               | 1.89  | 0.01  | 0.61 | 0.82 |
| scRNA     | HY4-L109                   | 2.11  | 0.00  | 0.61 | 0.82 |
| tRNA      | chr6.tRNA6-ArgACG          | 2.65  | -0.01 | 0.61 | 0.82 |
| scRNA     | HY4-L34                    | 1.71  | 0.00  | 0.61 | 0.82 |
| snoRNA    | U36B                       | 1.73  | 0.01  | 0.61 | 0.82 |
| mir-5p3pn | hsa-miR-451b               | 2.85  | 0.00  | 0.61 | 0.82 |
| scRNA     | HY4-L99                    | 1.47  | 0.00  | 0.61 | 0.82 |
| snoRNA    | U47                        | 3.87  | -0.01 | 0.61 | 0.82 |
| rRNA      | LSU-rRNA_Hsa-L355          | 3.30  | 0.00  | 0.61 | 0.82 |
| rRNA      | SSU-rRNA_Hsa-L25           | 4.08  | 0.00  | 0.61 | 0.82 |
| tRNA      | chr16.tRNA13-PseudoCTT     | 4.70  | 0.00  | 0.61 | 0.82 |
| piRNA     | piR-49144                  | 7.05  | 0.00  | 0.61 | 0.82 |
| snoRNA    | HBII-55                    | 4.51  | -0.01 | 0.61 | 0.82 |
| rRNA      | 5S-L103                    | 3.02  | 0.00  | 0.61 | 0.82 |
| scRNA     | BC200-L54                  | 4.73  | 0.00  | 0.61 | 0.82 |
| snoRNA    | ACA9                       | 1.70  | -0.01 | 0.61 | 0.82 |
| scRNA     | HY3-L105                   | 3.97  | 0.00  | 0.61 | 0.82 |
| tRNA      | chr1.tRNA102-PseudoTTC     | 6.55  | 0.00  | 0.61 | 0.82 |
| mir-5p3pn | hsa-miR-3615               | 7.34  | 0.00  | 0.61 | 0.82 |
| scRNA     | HY4-L97                    | 8.74  | 0.00  | 0.61 | 0.82 |
| scRNA     | HY4-L30                    | 3.53  | 0.00  | 0.61 | 0.82 |
| tRNA      | chr10.tRNA6-ValTAC         | 1.49  | -0.01 | 0.61 | 0.82 |



|           |                         |       |       |      |      |
|-----------|-------------------------|-------|-------|------|------|
| snoRNA    | HBII-234                | 2.40  | 0.01  | 0.61 | 0.82 |
| scRNA     | HY3-L239                | 1.82  | 0.01  | 0.62 | 0.82 |
| rRNA      | LSU-rRNA_Hsa-L309       | 8.19  | 0.00  | 0.62 | 0.82 |
| snoRNA    | ACA54                   | 1.60  | 0.00  | 0.62 | 0.82 |
| snoRNA    | U73a                    | 1.79  | -0.01 | 0.62 | 0.83 |
| scRNA     | HY1-L45                 | 1.90  | -0.01 | 0.62 | 0.83 |
| scRNA     | HY1-L287                | 6.16  | 0.00  | 0.62 | 0.83 |
| mir-5p    | hsa-miR-2115-5p         | 1.27  | 0.01  | 0.63 | 0.83 |
| mir-5p    | hsa-miR-424-5p          | 2.86  | 0.00  | 0.63 | 0.83 |
| scRNA     | HY4-L146                | 1.61  | 0.00  | 0.63 | 0.83 |
| mir-5p    | hsa-miR-130b-5p         | 4.40  | 0.01  | 0.63 | 0.83 |
| scRNA     | HY1-L389                | 2.66  | 0.00  | 0.63 | 0.83 |
| scRNA     | HY1-L227                | 1.30  | 0.01  | 0.63 | 0.83 |
| mir-3p    | hsa-miR-22-3p           | 10.18 | 0.00  | 0.63 | 0.83 |
| scRNA     | HY1-L106                | 1.92  | 0.00  | 0.63 | 0.83 |
| rRNA      | LSU-rRNA_Hsa-L84        | 2.86  | 0.00  | 0.63 | 0.83 |
| scRNA     | HY4-L46                 | 9.09  | 0.00  | 0.63 | 0.83 |
| mir-5p    | hsa-miR-148b-5p         | 2.87  | 0.00  | 0.64 | 0.83 |
| tRNA      | chr17.tRNA12-TrpCCA     | 2.18  | 0.00  | 0.64 | 0.84 |
| tRF5      | chr20.tRNA6-LeuAAG-tRF5 | 3.01  | 0.00  | 0.64 | 0.84 |
| rRNA      | LSU-rRNA_Hsa-L53        | 2.22  | 0.00  | 0.64 | 0.84 |
| mir-5p    | hsa-miR-574-5p          | 4.85  | 0.00  | 0.64 | 0.84 |
| mir-3p    | hsa-miR-142-3p          | 5.68  | 0.00  | 0.64 | 0.84 |
| snoRNA    | HBII-85-10              | 1.77  | 0.00  | 0.64 | 0.84 |
| rRNA      | 5S-L995                 | 3.46  | -0.01 | 0.64 | 0.84 |
| mir-3p    | hsa-miR-363-3p          | 7.85  | 0.00  | 0.64 | 0.84 |
| mir-5p    | hsa-miR-17-5p           | 5.08  | 0.00  | 0.64 | 0.84 |
| piRNA     | piR-33151-L4            | 4.06  | 0.00  | 0.65 | 0.84 |
| scRNA     | HY3-L272                | 1.38  | 0.00  | 0.65 | 0.84 |
| scRNA     | HY1-L133                | 2.77  | 0.00  | 0.65 | 0.84 |
| scRNA     | HY4-L159                | 4.47  | 0.00  | 0.65 | 0.84 |
| snoRNA    | U94                     | 3.12  | 0.00  | 0.65 | 0.84 |
| scRNA     | BC200-L73               | 2.27  | 0.00  | 0.65 | 0.84 |
| mir-5p3pn | hsa-miR-206             | 2.36  | 0.01  | 0.65 | 0.84 |
| mir-3p    | hsa-miR-30a-3p          | 5.31  | 0.00  | 0.65 | 0.84 |
| scRNA     | HY4-L21                 | 2.22  | 0.00  | 0.65 | 0.85 |
| rRNA      | 5S-L367                 | 1.91  | 0.00  | 0.66 | 0.85 |
| rRNA      | SSU-rRNA_Hsa-L67        | 3.08  | 0.00  | 0.66 | 0.85 |
| rRNA      | 5S-L137                 | 1.95  | 0.00  | 0.66 | 0.85 |
| mir-5p3pn | hsa-miR-4326            | 1.51  | -0.01 | 0.66 | 0.85 |
| scRNA     | HY4-L61                 | 5.54  | 0.00  | 0.66 | 0.85 |
| tRNA      | chr6.tRNA133-ValCAC     | 2.93  | 0.00  | 0.66 | 0.85 |
| piRNA     | piR-33650               | 3.05  | 0.00  | 0.66 | 0.85 |

|           |                          |       |       |      |      |
|-----------|--------------------------|-------|-------|------|------|
| mir-5p    | hsa-miR-125a-5p          | 4.98  | 0.00  | 0.66 | 0.85 |
| rRNA      | LSU-rRNA_Hsa-L29         | 2.54  | 0.00  | 0.66 | 0.85 |
| mir-5p    | hsa-miR-3173-5p          | 2.41  | -0.01 | 0.66 | 0.85 |
| piRNA     | piR-33082                | 7.18  | 0.00  | 0.67 | 0.85 |
| mir-3p    | hsa-miR-126-3p           | 11.12 | 0.00  | 0.67 | 0.85 |
| scRNA     | HY1-L397                 | 3.27  | 0.00  | 0.67 | 0.85 |
| scRNA     | HY1-L192                 | 5.99  | 0.00  | 0.67 | 0.85 |
| tRNA      | chr6.tRNA129-MetCAT      | 5.33  | 0.00  | 0.67 | 0.85 |
| snoRNA    | ACA16                    | 2.81  | 0.00  | 0.67 | 0.85 |
| scRNA     | HY1-L174                 | 1.36  | 0.00  | 0.67 | 0.85 |
| rRNA      | LSU-rRNA_Hsa-L339        | 2.35  | -0.01 | 0.67 | 0.85 |
| scRNA     | BC200-L149               | 1.76  | 0.00  | 0.67 | 0.85 |
| mir-5p    | hsa-miR-550a-3-5p        | 1.55  | 0.00  | 0.67 | 0.85 |
| mir-5p3pn | hsa-miR-548e             | 2.60  | 0.00  | 0.67 | 0.85 |
| scRNA     | BC200-L11                | 1.53  | 0.00  | 0.67 | 0.85 |
| scRNA     | HY3-L190                 | 2.20  | 0.00  | 0.67 | 0.86 |
| rRNA      | 5S-L815                  | 2.57  | 0.00  | 0.68 | 0.86 |
| mir-5p    | hsa-miR-3074-5p          | 9.31  | 0.00  | 0.68 | 0.86 |
| scRNA     | BC200-L138               | 4.89  | 0.00  | 0.68 | 0.86 |
| mir-3p    | hsa-miR-340-3p           | 4.29  | 0.00  | 0.68 | 0.86 |
| scRNA     | HY4-L66                  | 7.15  | 0.00  | 0.68 | 0.86 |
| scRNA     | HY4-L50                  | 1.52  | 0.00  | 0.68 | 0.86 |
| rRNA      | 5S-L1070                 | 1.47  | 0.01  | 0.69 | 0.86 |
| scRNA     | HY1                      | 6.00  | 0.00  | 0.69 | 0.86 |
| mir-5p    | hsa-miR-331-5p           | 1.29  | 0.01  | 0.69 | 0.87 |
| snoRNA    | U38B                     | 2.96  | 0.00  | 0.69 | 0.87 |
| rRNA      | LSU-rRNA_Hsa-L34         | 1.35  | 0.00  | 0.69 | 0.87 |
| mir-5p3pn | hsa-miR-3928             | 1.51  | 0.00  | 0.69 | 0.87 |
| snoRNA    | ACA53                    | 3.01  | 0.00  | 0.69 | 0.87 |
| tRF3      | chr14.tRNA14-GluTTC-tRF3 | 2.02  | 0.01  | 0.69 | 0.87 |
| snoRNA    | U18C                     | 1.82  | 0.01  | 0.69 | 0.87 |
| snoRNA    | HBII-99B                 | 1.87  | 0.01  | 0.69 | 0.87 |
| mir-5p    | hsa-miR-191-5p           | 8.87  | 0.00  | 0.69 | 0.87 |
| mir-5p3pn | hsa-miR-378c             | 5.35  | 0.00  | 0.70 | 0.87 |
| rRNA      | 5S-L1270                 | 1.27  | 0.00  | 0.70 | 0.87 |
| piRNA     | piR-59299                | 1.72  | 0.00  | 0.70 | 0.87 |
| snRNA     | U1-L38                   | 1.64  | 0.00  | 0.70 | 0.87 |
| mir-5p3pn | hsa-let-7c-L2            | 5.48  | 0.00  | 0.70 | 0.87 |
| tRNA      | chr1.tRNA119-LysCTT      | 7.12  | 0.00  | 0.70 | 0.87 |
| scRNA     | HY1-L37                  | 6.31  | 0.00  | 0.70 | 0.87 |
| piRNA     | piR-45195-L2             | 1.33  | 0.01  | 0.70 | 0.87 |
| mir-5p    | hsa-miR-155-5p           | 4.35  | 0.00  | 0.70 | 0.87 |
| rRNA      | 5S-L1262                 | 1.38  | 0.01  | 0.71 | 0.87 |

|           |                          |       |       |      |      |
|-----------|--------------------------|-------|-------|------|------|
| mir-3p    | hsa-miR-3913-3p          | 1.59  | 0.00  | 0.71 | 0.88 |
| scRNA     | HY4-L153                 | 8.62  | 0.00  | 0.71 | 0.88 |
| mir-3p    | hsa-let-7b-3p            | 3.86  | 0.00  | 0.71 | 0.88 |
| tRNA      | chr6.tRNA105-AlaAGC      | 1.66  | -0.01 | 0.71 | 0.88 |
| scRNA     | HY4-L103                 | 4.44  | 0.00  | 0.71 | 0.88 |
| snoRNA    | U80                      | 3.36  | 0.00  | 0.71 | 0.88 |
| mir-3p    | hsa-miR-542-3p           | 3.60  | 0.00  | 0.71 | 0.88 |
| tRF5      | chr11.tRNA16-ValTAC-tRF5 | 1.57  | 0.00  | 0.71 | 0.88 |
| scRNA     | HY4-L126                 | 3.61  | 0.00  | 0.71 | 0.88 |
| snoRNA    | U56                      | 2.63  | 0.00  | 0.72 | 0.88 |
| rRNA      | LSU-rRNA_Hsa-L365        | 1.60  | 0.00  | 0.72 | 0.88 |
| rRNA      | 5S-L578                  | 2.37  | 0.00  | 0.72 | 0.88 |
| rRNA      | 5S-L986                  | 1.69  | 0.00  | 0.72 | 0.88 |
| tRNA      | chr16.tRNA10-LysCTT      | 4.96  | 0.00  | 0.72 | 0.88 |
| tRNA      | chr1.tRNA58-LeuCAA       | 3.40  | 0.00  | 0.72 | 0.88 |
| rRNA      | 5S-L1068                 | 2.39  | 0.00  | 0.72 | 0.88 |
| mir-5p    | hsa-miR-139-5p           | 6.03  | 0.00  | 0.72 | 0.88 |
| scRNA     | HY1-L179                 | 6.39  | 0.00  | 0.72 | 0.88 |
| scRNA     | HY3-L82                  | 3.20  | 0.00  | 0.73 | 0.88 |
| scRNA     | HY1-L111                 | 1.93  | 0.00  | 0.73 | 0.88 |
| snoRNA    | U83B                     | 2.68  | 0.00  | 0.73 | 0.88 |
| snoRNA    | U44                      | 6.36  | 0.00  | 0.73 | 0.88 |
| snoRNA    | U103B                    | 3.30  | 0.00  | 0.73 | 0.89 |
| tRF3      | chr10.tRNA2-SerTGA-tRF3  | 2.00  | 0.00  | 0.73 | 0.89 |
| mir-5p3pn | hsa-miR-320a             | 11.48 | 0.00  | 0.73 | 0.89 |
| tRNA      | chr20.tRNA3-PseudoCAC    | 1.30  | 0.00  | 0.73 | 0.89 |
| mir-5p3pn | hsa-miR-378g             | 2.04  | 0.00  | 0.73 | 0.89 |
| snoRNA    | HBII-99                  | 4.91  | 0.00  | 0.73 | 0.89 |
| rRNA      | 5S-L471                  | 2.19  | 0.00  | 0.73 | 0.89 |
| snoRNA    | U45A                     | 4.15  | 0.00  | 0.73 | 0.89 |
| scRNA     | HY4-L147                 | 9.21  | 0.00  | 0.73 | 0.89 |
| mir-5p3pn | hsa-miR-1294             | 1.62  | 0.00  | 0.74 | 0.89 |
| snRNA     | U2-L765                  | 2.07  | 0.00  | 0.74 | 0.89 |
| tRNA      | chr1.tRNA117-GlyTCC      | 2.71  | 0.00  | 0.74 | 0.89 |
| rRNA      | 5S-L254                  | 2.29  | 0.00  | 0.74 | 0.89 |
| tRNA      | chr17.tRNA10-GlyTCC      | 1.81  | 0.00  | 0.74 | 0.89 |
| snoRNA    | U87                      | 1.66  | 0.00  | 0.74 | 0.89 |
| tRNA      | chr6.tRNA175-SerGCT      | 2.05  | -0.01 | 0.74 | 0.89 |
| mir-5p    | hsa-miR-454-5p           | 2.36  | 0.00  | 0.74 | 0.89 |
| piRNA     | piR-36743                | 3.67  | 0.00  | 0.75 | 0.89 |
| mir-3p    | hsa-miR-424-3p           | 4.70  | 0.00  | 0.75 | 0.89 |
| scRNA     | HY1-L280                 | 2.44  | 0.00  | 0.75 | 0.89 |
| rRNA      | 5S-L297                  | 1.59  | 0.00  | 0.75 | 0.90 |

|           |                            |       |      |      |      |
|-----------|----------------------------|-------|------|------|------|
| mir-5p    | hsa-miR-505-5p             | 1.81  | 0.00 | 0.75 | 0.90 |
| snoRNA    | HBII-180A                  | 2.03  | 0.00 | 0.75 | 0.90 |
| scRNA     | HY1-L409                   | 2.73  | 0.00 | 0.75 | 0.90 |
| rRNA      | LSU-rRNA_Hsa-L124          | 2.33  | 0.00 | 0.75 | 0.90 |
| mir-5p3pn | hsa-miR-378e               | 1.50  | 0.00 | 0.75 | 0.90 |
| snoRNA    | U43                        | 4.95  | 0.00 | 0.75 | 0.90 |
| tRF3      | chr9.tRNA6-AspGTC-tRF3     | 1.45  | 0.00 | 0.76 | 0.90 |
| tRNA      | chr16.tRNA25-GlyGCC        | 4.78  | 0.00 | 0.76 | 0.90 |
| tRNA      | chr11.tRNA16-ValTAC        | 4.20  | 0.00 | 0.76 | 0.90 |
| snoRNA    | HBII-336                   | 2.07  | 0.00 | 0.76 | 0.90 |
| piRNA     | piR-44716                  | 4.74  | 0.01 | 0.76 | 0.90 |
| snoRNA    | HBII-202                   | 6.44  | 0.00 | 0.76 | 0.90 |
| snoRNA    | ACA44                      | 2.30  | 0.00 | 0.76 | 0.90 |
| scRNA     | HY4-L81                    | 3.17  | 0.00 | 0.77 | 0.91 |
| scRNA     | HY1-L263                   | 2.72  | 0.00 | 0.77 | 0.91 |
| snoRNA    | snR38C                     | 2.03  | 0.00 | 0.77 | 0.91 |
| snoRNA    | ACA18                      | 2.07  | 0.00 | 0.77 | 0.91 |
| mir-5p    | hsa-miR-3184-5p            | 7.99  | 0.00 | 0.77 | 0.91 |
| snRNA     | U1-L7                      | 6.15  | 0.00 | 0.77 | 0.91 |
| tRF5      | chr1.tRNA109-PseudoGTT-tRF | 1.70  | 0.00 | 0.77 | 0.91 |
| scRNA     | HY4-L39                    | 3.89  | 0.00 | 0.77 | 0.91 |
| rRNA      | LSU-rRNA_Hsa-L73           | 2.19  | 0.00 | 0.78 | 0.91 |
| mir-3p    | hsa-miR-92a-3p             | 11.39 | 0.00 | 0.78 | 0.91 |
| mir-3p    | hsa-miR-4677-3p            | 1.78  | 0.00 | 0.78 | 0.91 |
| mir-5p    | hsa-let-7d-5p              | 8.11  | 0.00 | 0.78 | 0.91 |
| piRNA     | piR-30890                  | 3.30  | 0.00 | 0.78 | 0.91 |
| mir-3p    | hsa-miR-3187-3p            | 1.63  | 0.00 | 0.78 | 0.91 |
| scRNA     | HY4-L52                    | 2.37  | 0.00 | 0.78 | 0.91 |
| rRNA      | LSU-rRNA_Hsa-L305          | 5.25  | 0.00 | 0.78 | 0.91 |
| rRNA      | LSU-rRNA_Hsa-L331          | 1.53  | 0.00 | 0.78 | 0.91 |
| rRNA      | 5S-L1014                   | 1.64  | 0.00 | 0.78 | 0.91 |
| snRNA     | U6-L440                    | 1.98  | 0.00 | 0.78 | 0.91 |
| mir-3p    | hsa-miR-30c-2-3p           | 1.38  | 0.00 | 0.78 | 0.91 |
| piRNA     | piR-35469                  | 1.70  | 0.00 | 0.78 | 0.91 |
| piRNA     | piR-36707                  | 5.03  | 0.00 | 0.79 | 0.91 |
| tRNA      | chr14.tRNA10-IleAAT        | 1.41  | 0.00 | 0.79 | 0.92 |
| mir-3p    | hsa-miR-29b-3p             | 2.25  | 0.00 | 0.79 | 0.92 |
| scRNA     | HY1-L26                    | 2.97  | 0.00 | 0.79 | 0.92 |
| scRNA     | HY3-L497                   | 2.14  | 0.00 | 0.79 | 0.92 |
| scRNA     | BC200-L156                 | 2.60  | 0.00 | 0.79 | 0.92 |
| scRNA     | HY4-L162                   | 1.65  | 0.00 | 0.79 | 0.92 |
| snoRNA    | U22                        | 3.81  | 0.00 | 0.79 | 0.92 |
| tRNA      | chr1.tRNA4-GlyCCC          | 5.56  | 0.00 | 0.80 | 0.92 |

|           |                          |       |      |      |      |
|-----------|--------------------------|-------|------|------|------|
| mir-5p3pn | hsa-miR-210              | 2.15  | 0.00 | 0.80 | 0.92 |
| scRNA     | HY3-L34                  | 3.61  | 0.00 | 0.80 | 0.92 |
| rRNA      | LSU-rRNA_Hsa-L185        | 2.41  | 0.00 | 0.80 | 0.92 |
| scRNA     | HY1-L67                  | 6.00  | 0.00 | 0.80 | 0.93 |
| rRNA      | LSU-rRNA_Hsa-L164        | 5.97  | 0.00 | 0.80 | 0.93 |
| scRNA     | HY3-L45                  | 3.48  | 0.00 | 0.80 | 0.93 |
| snoRNA    | HBII-13                  | 3.91  | 0.00 | 0.81 | 0.93 |
| mir-3p    | hsa-let-7i-3p            | 1.50  | 0.00 | 0.81 | 0.93 |
| tRF5      | chr19.tRNA5-LysCTT-tRF5  | 4.33  | 0.00 | 0.81 | 0.93 |
| rRNA      | 5S-L1196                 | 2.21  | 0.00 | 0.81 | 0.93 |
| rRNA      | LSU-rRNA_Hsa-L378        | 2.47  | 0.00 | 0.81 | 0.93 |
| snRNA     | U1-L174                  | 1.76  | 0.00 | 0.81 | 0.93 |
| mir-3p    | hsa-miR-200c-3p          | 2.75  | 0.00 | 0.81 | 0.93 |
| scRNA     | HY4-L36                  | 2.19  | 0.00 | 0.81 | 0.93 |
| rRNA      | LSU-rRNA_Hsa-L31         | 7.70  | 0.00 | 0.81 | 0.93 |
| mir-5p3pn | hsa-miR-2110             | 5.17  | 0.00 | 0.81 | 0.93 |
| snoRNA    | E3                       | 2.67  | 0.00 | 0.82 | 0.93 |
| snoRNA    | U30                      | 6.13  | 0.00 | 0.82 | 0.93 |
| tRNA      | chr22.tRNA1-SeCTCA       | 2.22  | 0.00 | 0.82 | 0.93 |
| snoRNA    | U82                      | 5.05  | 0.00 | 0.82 | 0.93 |
| tRNA      | chr12.tRNA6-TrpCCA       | 2.86  | 0.00 | 0.82 | 0.93 |
| rRNA      | LSU-rRNA_Hsa-L140        | 4.43  | 0.00 | 0.82 | 0.93 |
| mir-3p    | hsa-miR-92b-3p           | 4.74  | 0.00 | 0.82 | 0.93 |
| rRNA      | 5S-L935                  | 2.94  | 0.00 | 0.82 | 0.93 |
| scRNA     | HY1-L342                 | 1.37  | 0.00 | 0.82 | 0.93 |
| piRNA     | piR-61174                | 1.23  | 0.00 | 0.82 | 0.93 |
| mir-5p    | hsa-miR-200c-5p          | 2.01  | 0.00 | 0.82 | 0.93 |
| tRNA      | chr16.tRNA27-LeuTAG      | 2.12  | 0.00 | 0.82 | 0.93 |
| piRNA     | piR-36412                | 2.37  | 0.00 | 0.83 | 0.94 |
| scRNA     | BC200-L36                | 2.68  | 0.00 | 0.83 | 0.94 |
| mir-5p3pn | hsa-miR-328              | 4.07  | 0.00 | 0.83 | 0.94 |
| tRNA      | chr5.tRNA4-ValAAC        | 2.29  | 0.00 | 0.83 | 0.94 |
| scRNA     | HY4-L139                 | 10.83 | 0.00 | 0.83 | 0.94 |
| rRNA      | 5S-L1164                 | 2.08  | 0.00 | 0.83 | 0.94 |
| piRNA     | piR-33382-L2             | 2.24  | 0.00 | 0.83 | 0.94 |
| mir-5p    | hsa-miR-4732-5p          | 3.27  | 0.00 | 0.83 | 0.94 |
| tRF5      | chr17.tRNA21-ArgCCT-tRF5 | 1.45  | 0.00 | 0.83 | 0.94 |
| tRNA      | chr16.tRNA18-GlyGCC      | 1.78  | 0.00 | 0.83 | 0.94 |
| snoRNA    | U25                      | 5.20  | 0.00 | 0.83 | 0.94 |
| piRNA     | piR-53659                | 2.18  | 0.00 | 0.84 | 0.94 |
| tRNA      | chr17.tRNA31-AsnGTT      | 2.61  | 0.00 | 0.84 | 0.94 |
| tRNA      | chr16.tRNA32-LysCTT      | 2.11  | 0.00 | 0.84 | 0.94 |
| mir-5p3pn | hsa-miR-598              | 1.78  | 0.00 | 0.84 | 0.94 |

|           |                          |      |      |      |      |
|-----------|--------------------------|------|------|------|------|
| rRNA      | 5S-L1115                 | 1.30 | 0.00 | 0.84 | 0.94 |
| snoRNA    | U100                     | 1.54 | 0.00 | 0.84 | 0.94 |
| mir-5p3pn | hsa-miR-1180             | 4.05 | 0.00 | 0.84 | 0.94 |
| tRNA      | chr6.tRNA75-MetCAT       | 1.36 | 0.00 | 0.84 | 0.94 |
| snoRNA    | ACA7                     | 2.31 | 0.00 | 0.84 | 0.94 |
| scRNA     | HY4-L129                 | 3.45 | 0.00 | 0.84 | 0.94 |
| mir-5p    | hsa-miR-450b-5p          | 5.25 | 0.00 | 0.84 | 0.94 |
| snRNA     | U2-L218                  | 1.63 | 0.00 | 0.84 | 0.94 |
| snoRNA    | ACA34                    | 4.14 | 0.00 | 0.84 | 0.94 |
| snoRNA    | HBII-180C                | 4.12 | 0.00 | 0.85 | 0.94 |
| snoRNA    | U29                      | 5.29 | 0.00 | 0.85 | 0.94 |
| mir-5p    | hsa-miR-369-5p           | 1.73 | 0.00 | 0.85 | 0.94 |
| mir-5p3pn | hsa-miR-618              | 2.72 | 0.00 | 0.85 | 0.94 |
| scRNA     | HY1-L69                  | 4.11 | 0.00 | 0.85 | 0.94 |
| scRNA     | HY4-L16                  | 3.92 | 0.00 | 0.85 | 0.94 |
| scRNA     | HY1-L208                 | 3.29 | 0.00 | 0.85 | 0.94 |
| mir-5p3pn | hsa-miR-320d-L2          | 3.63 | 0.00 | 0.85 | 0.94 |
| mir-3p    | hsa-miR-335-3p           | 3.66 | 0.00 | 0.86 | 0.94 |
| mir-5p3pn | hsa-miR-1299             | 2.07 | 0.00 | 0.86 | 0.94 |
| mir-5p3pn | hsa-miR-1976             | 1.89 | 0.00 | 0.86 | 0.95 |
| rRNA      | LSU-rRNA_Hsa-L251        | 7.46 | 0.00 | 0.86 | 0.95 |
| snoRNA    | U61                      | 5.55 | 0.00 | 0.86 | 0.95 |
| mir-3p    | hsa-miR-2355-3p          | 1.86 | 0.00 | 0.86 | 0.95 |
| piRNA     | piR-61465                | 3.75 | 0.00 | 0.86 | 0.95 |
| scRNA     | HY3-L203                 | 1.78 | 0.00 | 0.87 | 0.95 |
| tRF5      | chr6.tRNA114-ArgCCG-tRF5 | 1.61 | 0.00 | 0.87 | 0.95 |
| scRNA     | BC200-L67                | 4.19 | 0.00 | 0.87 | 0.95 |
| scRNA     | HY1-L28                  | 1.58 | 0.00 | 0.87 | 0.95 |
| snoRNA    | U38A                     | 4.23 | 0.00 | 0.87 | 0.95 |
| mir-5p    | hsa-miR-3614-5p          | 1.91 | 0.00 | 0.87 | 0.95 |
| piRNA     | piR-36323-L3             | 2.88 | 0.00 | 0.87 | 0.95 |
| snoRNA    | U15A                     | 2.09 | 0.00 | 0.87 | 0.95 |
| snoRNA    | mgh18S-121               | 1.93 | 0.00 | 0.88 | 0.95 |
| snRNA     | U7-L52                   | 6.85 | 0.00 | 0.88 | 0.95 |
| rRNA      | 5S-L363                  | 1.50 | 0.00 | 0.88 | 0.96 |
| rRNA      | LSU-rRNA_Hsa-L151        | 3.13 | 0.00 | 0.88 | 0.96 |
| scRNA     | HY3-L432                 | 1.48 | 0.00 | 0.88 | 0.96 |
| mir-3p    | hsa-miR-574-3p           | 1.66 | 0.00 | 0.88 | 0.96 |
| mir-5p3pn | hsa-miR-5096             | 2.21 | 0.00 | 0.88 | 0.96 |
| mir-3p    | hsa-miR-570-3p           | 1.85 | 0.00 | 0.88 | 0.96 |
| snoRNA    | HBII-276                 | 3.49 | 0.00 | 0.88 | 0.96 |
| mir-3p    | hsa-miR-324-3p           | 1.81 | 0.00 | 0.88 | 0.96 |
| rRNA      | LSU-rRNA_Hsa-L67         | 3.16 | 0.00 | 0.89 | 0.96 |

|           |                     |      |      |      |      |
|-----------|---------------------|------|------|------|------|
| tRNA      | chr1.tRNA15-GlnCTG  | 2.98 | 0.00 | 0.89 | 0.96 |
| piRNA     | piR-61647-L4        | 3.62 | 0.00 | 0.89 | 0.96 |
| rRNA      | LSU-rRNA_Hsa-L348   | 1.92 | 0.00 | 0.89 | 0.96 |
| scRNA     | HY4-L149            | 1.76 | 0.00 | 0.89 | 0.96 |
| snoRNA    | U58B                | 4.91 | 0.00 | 0.89 | 0.97 |
| scRNA     | BC200-L146          | 2.61 | 0.00 | 0.90 | 0.97 |
| mir-5p    | hsa-miR-20b-5p      | 3.49 | 0.00 | 0.90 | 0.97 |
| scRNA     | HY1-L393            | 1.73 | 0.00 | 0.90 | 0.97 |
| mir-5p    | hsa-miR-193a-5p     | 5.17 | 0.00 | 0.90 | 0.97 |
| snRNA     | U3-L75              | 3.12 | 0.00 | 0.90 | 0.97 |
| snoRNA    | U83A                | 3.52 | 0.00 | 0.90 | 0.97 |
| rRNA      | 5S-L983             | 1.77 | 0.00 | 0.90 | 0.97 |
| mir-5p    | hsa-miR-4746-5p     | 1.73 | 0.00 | 0.90 | 0.97 |
| piRNA     | piR-48772-L2        | 1.95 | 0.00 | 0.90 | 0.97 |
| mir-3p    | hsa-miR-17-3p       | 1.53 | 0.00 | 0.90 | 0.97 |
| mir-5p    | hsa-miR-30b-5p      | 2.47 | 0.00 | 0.90 | 0.97 |
| mir-5p    | hsa-miR-148a-5p     | 4.17 | 0.00 | 0.90 | 0.97 |
| mir-5p3pn | hsa-miR-1468        | 2.31 | 0.00 | 0.90 | 0.97 |
| mir-5p    | hsa-miR-30c-5p      | 6.47 | 0.00 | 0.91 | 0.97 |
| mir-5p3pn | hsa-miR-4447        | 1.30 | 0.00 | 0.91 | 0.97 |
| mir-5p3pn | hsa-miR-1278        | 1.56 | 0.00 | 0.91 | 0.97 |
| snoRNA    | U42B                | 4.22 | 0.00 | 0.91 | 0.97 |
| mir-5p    | hsa-miR-129-5p-L2   | 1.82 | 0.00 | 0.91 | 0.97 |
| tRNA      | chr16.tRNA17-LeuCAG | 3.38 | 0.00 | 0.91 | 0.97 |
| mir-5p3pn | hsa-miR-942         | 3.31 | 0.00 | 0.91 | 0.97 |
| tRNA      | chr1.tRNA9-ArgTCT   | 2.50 | 0.00 | 0.91 | 0.97 |
| snoRNA    | U101                | 5.22 | 0.00 | 0.91 | 0.97 |
| snRNA     | U17                 | 1.81 | 0.00 | 0.92 | 0.97 |
| tRNA      | chr16.tRNA7-LysCTT  | 2.24 | 0.00 | 0.92 | 0.97 |
| mir-5p    | hsa-miR-1307-5p     | 1.42 | 0.00 | 0.92 | 0.97 |
| scRNA     | HY1-L261            | 1.76 | 0.00 | 0.92 | 0.97 |
| scRNA     | HY3-L177            | 1.55 | 0.00 | 0.92 | 0.97 |
| snRNA     | U2-L166             | 3.45 | 0.00 | 0.92 | 0.97 |
| snRNA     | U1-L24              | 2.67 | 0.00 | 0.92 | 0.97 |
| scRNA     | HY1-L226            | 3.29 | 0.00 | 0.92 | 0.97 |
| snoRNA    | ACA66               | 2.24 | 0.00 | 0.92 | 0.97 |
| rRNA      | LSU-rRNA_Hsa-L163   | 9.10 | 0.00 | 0.92 | 0.97 |
| rRNA      | 5S-L1129            | 1.90 | 0.00 | 0.92 | 0.97 |
| mir-3p    | hsa-miR-181a-3p     | 2.62 | 0.00 | 0.92 | 0.97 |
| mir-5p    | hsa-miR-15a-5p      | 3.78 | 0.00 | 0.92 | 0.97 |
| tRNA      | chr6.tRNA166-AlaAGC | 1.77 | 0.00 | 0.93 | 0.97 |
| piRNA     | piR-51119           | 2.10 | 0.00 | 0.93 | 0.97 |
| snoRNA    | U83                 | 2.97 | 0.00 | 0.93 | 0.97 |

|           |                            |       |      |      |      |
|-----------|----------------------------|-------|------|------|------|
| scRNA     | HY4-L41                    | 1.86  | 0.00 | 0.93 | 0.97 |
| mir-5p3pn | hsa-miR-1301               | 4.06  | 0.00 | 0.93 | 0.97 |
| mir-5p    | hsa-miR-361-5p             | 3.48  | 0.00 | 0.93 | 0.97 |
| scRNA     | HY4-L6                     | 3.98  | 0.00 | 0.93 | 0.97 |
| rRNA      | LSU-rRNA_Hsa-L214          | 2.13  | 0.00 | 0.93 | 0.98 |
| scRNA     | HY1-L326                   | 1.43  | 0.00 | 0.94 | 0.98 |
| snoRNA    | HBII-210                   | 5.47  | 0.00 | 0.94 | 0.98 |
| scRNA     | HY1-L324                   | 1.92  | 0.00 | 0.94 | 0.98 |
| tRF3      | chr18.tRNA2-PseudoTCC-tRF3 | 3.09  | 0.00 | 0.94 | 0.98 |
| rRNA      | LSU-rRNA_Hsa-L298          | 3.46  | 0.00 | 0.94 | 0.98 |
| piRNA     | piR-36170                  | 2.57  | 0.00 | 0.94 | 0.98 |
| snoRNA    | U97                        | 1.94  | 0.00 | 0.94 | 0.98 |
| scRNA     | HY4-L77                    | 2.15  | 0.00 | 0.94 | 0.98 |
| rRNA      | LSU-rRNA_Hsa-L144          | 1.61  | 0.00 | 0.95 | 0.99 |
| tRF5      | chr17.tRNA26-CysGCA-tRF5   | 5.39  | 0.00 | 0.95 | 0.99 |
| mir-3p    | hsa-miR-145-3p             | 4.84  | 0.00 | 0.95 | 0.99 |
| mir-3p    | hsa-miR-3150b-3p           | 1.47  | 0.00 | 0.95 | 0.99 |
| rRNA      | 5S-L397                    | 1.55  | 0.00 | 0.95 | 0.99 |
| mir-3p    | hsa-miR-200b-3p            | 1.87  | 0.00 | 0.95 | 0.99 |
| mir-5p3pn | hsa-miR-3138               | 1.71  | 0.00 | 0.95 | 0.99 |
| rRNA      | LSU-rRNA_Hsa-L60           | 12.44 | 0.00 | 0.95 | 0.99 |
| rRNA      | LSU-rRNA_Hsa-L162          | 2.42  | 0.00 | 0.95 | 0.99 |
| rRNA      | 5S-L344                    | 2.37  | 0.00 | 0.96 | 0.99 |
| snRNA     | U5-L76                     | 2.57  | 0.00 | 0.96 | 0.99 |
| snoRNA    | U18B                       | 2.75  | 0.00 | 0.96 | 0.99 |
| mir-3p    | hsa-miR-3605-3p            | 2.12  | 0.00 | 0.96 | 0.99 |
| piRNA     | piR-36376                  | 2.64  | 0.00 | 0.96 | 0.99 |
| rRNA      | LSU-rRNA_Hsa-L297          | 1.90  | 0.00 | 0.96 | 0.99 |
| snoRNA    | HBII-82                    | 2.15  | 0.00 | 0.96 | 0.99 |
| piRNA     | piR-57824                  | 1.45  | 0.00 | 0.96 | 0.99 |
| mir-5p    | hsa-let-7a-5p-L3           | 12.09 | 0.00 | 0.97 | 0.99 |
| piRNA     | piR-35952-L5               | 2.44  | 0.00 | 0.97 | 0.99 |
| mir-3p    | hsa-miR-548g-3p            | 2.15  | 0.00 | 0.97 | 0.99 |
| mir-3p    | hsa-let-7f-2-3p            | 1.55  | 0.00 | 0.97 | 0.99 |
| mir-5p    | hsa-miR-193b-5p            | 2.08  | 0.00 | 0.97 | 0.99 |
| mir-3p    | hsa-miR-150-3p             | 2.88  | 0.00 | 0.97 | 0.99 |
| scRNA     | HY3-L62                    | 1.84  | 0.00 | 0.97 | 0.99 |
| scRNA     | HY1-L171                   | 1.68  | 0.00 | 0.97 | 0.99 |
| mir-5p3pn | hsa-miR-320b               | 4.99  | 0.00 | 0.97 | 0.99 |
| snoRNA    | U13-L162                   | 2.04  | 0.00 | 0.97 | 0.99 |
| scRNA     | HY1-L137                   | 4.44  | 0.00 | 0.97 | 0.99 |
| piRNA     | piR-41588                  | 1.60  | 0.00 | 0.97 | 0.99 |
| tRNA      | chr3.tRNA10-PseudoCTC      | 7.60  | 0.00 | 0.97 | 0.99 |



|           |                     |      |      |      |      |
|-----------|---------------------|------|------|------|------|
| scRNA     | HY1-L414            | 1.30 | 0.00 | 0.98 | 0.99 |
| rRNA      | LSU-rRNA_Hsa-L323   | 8.20 | 0.00 | 0.98 | 0.99 |
| tRNA      | chr5.tRNA14-ProTGG  | 4.85 | 0.00 | 0.98 | 0.99 |
| mir-3p    | hsa-miR-374a-3p     | 3.85 | 0.00 | 0.98 | 0.99 |
| scRNA     | HY1-L143            | 2.32 | 0.00 | 0.98 | 0.99 |
| rRNA      | 5S-L115             | 1.96 | 0.00 | 0.98 | 0.99 |
| scRNA     | HY1-L183            | 2.44 | 0.00 | 0.98 | 0.99 |
| tRNA      | chr16.tRNA34-GlyCCC | 4.00 | 0.00 | 0.98 | 0.99 |
| snRNA     | U3-L74              | 2.45 | 0.00 | 0.98 | 1.00 |
| scRNA     | HY4-L20             | 3.35 | 0.00 | 0.98 | 1.00 |
| snRNA     | U3-L78              | 4.40 | 0.00 | 0.98 | 1.00 |
| mir-3p    | hsa-miR-369-3p      | 1.38 | 0.00 | 0.98 | 1.00 |
| mir-3p    | hsa-miR-26b-3p      | 2.34 | 0.00 | 0.98 | 1.00 |
| piRNA     | piR-36074           | 4.27 | 0.00 | 0.99 | 1.00 |
| scRNA     | HY4-L114            | 2.44 | 0.00 | 0.99 | 1.00 |
| tRNA      | chr6.tRNA78-LeuAAG  | 2.00 | 0.00 | 0.99 | 1.00 |
| scRNA     | HY4-L18             | 1.43 | 0.00 | 0.99 | 1.00 |
| scRNA     | BC200-L23           | 3.06 | 0.00 | 0.99 | 1.00 |
| scRNA     | BC200-L19           | 1.37 | 0.00 | 0.99 | 1.00 |
| scRNA     | HY4-L42             | 1.44 | 0.00 | 0.99 | 1.00 |
| mir-5p3pn | hsa-miR-1908        | 3.10 | 0.00 | 0.99 | 1.00 |
| snRNA     | U2-L288             | 2.57 | 0.00 | 0.99 | 1.00 |
| piRNA     | piR-44984-L3        | 2.62 | 0.00 | 0.99 | 1.00 |
| rRNA      | LSU-rRNA_Hsa-L109   | 1.47 | 0.00 | 0.99 | 1.00 |
| mir-3p    | hsa-miR-1285-3p     | 3.54 | 0.00 | 0.99 | 1.00 |
| snoRNA    | HBII-135            | 5.06 | 0.00 | 1.00 | 1.00 |
| scRNA     | HY1-L269            | 1.87 | 0.00 | 1.00 | 1.00 |
| tRNA      | chr3.tRNA7-CysGCA   | 1.80 | 0.00 | 1.00 | 1.00 |
| rRNA      | LSU-rRNA_Hsa-L42    | 1.88 | 0.00 | 1.00 | 1.00 |

**Supplementary Table 8: RNA correlations with baseline WCC**

| <i>RNA type</i> | <i>ID</i>                | <i>Average read count (log2 CPM)</i> | <i>Correlation coefficient</i> | <i>P-value</i> | <i>Adjusted P-value</i> |
|-----------------|--------------------------|--------------------------------------|--------------------------------|----------------|-------------------------|
| scRNA           | BC200-L96                | 0.20                                 | 5.30                           | 1.69E-04       | 0.18                    |
| piRNA           | piR-33382                | -0.18                                | 8.69                           | 2.48E-04       | 0.18                    |
| scRNA           | BC200-L166               | -0.31                                | 2.95                           | 4.98E-04       | 0.25                    |
| mir-5p          | hsa-miR-122-5p           | 0.18                                 | 9.88                           | 2.15E-03       | 0.68                    |
| tRF3            | chr14.tRNA10-IleAAT-tRF3 | -0.32                                | 2.47                           | 2.27E-03       | 0.68                    |
| snRNA           | U7-L212                  | -0.40                                | 2.30                           | 2.76E-03       | 0.68                    |
| tRF3            | chr6.tRNA36-ArgACG-tRF3  | -0.22                                | 4.47                           | 3.97E-03       | 0.79                    |
| tRNA            | chr1.tRNA4-GlyCCC        | -0.15                                | 5.56                           | 4.26E-03       | 0.79                    |
| mir-5p3pno      | hsa-miR-206              | -0.38                                | 2.36                           | 5.49E-03       | 0.79                    |
| mir-3p          | hsa-miR-125b-2-3p        | -0.33                                | 1.53                           | 5.77E-03       | 0.79                    |
| rRNA            | LSU-rRNA_Hsa-L378        | -0.33                                | 2.46                           | 5.87E-03       | 0.79                    |
| tRF5            | chr1.tRNA118-HisGTG-tRF5 | -0.30                                | 1.83                           | 6.89E-03       | 0.85                    |
| snoRNA          | U36A                     | -0.49                                | 1.72                           | 8.07E-03       | 0.85                    |
| tRF5            | chr16.tRNA23-LysTTT-tRF5 | -0.23                                | 3.56                           | 8.35E-03       | 0.85                    |
| tRNA            | chr6.tRNA172-SerTGA      | -0.42                                | 1.90                           | 8.59E-03       | 0.85                    |
| mir-3p          | hsa-miR-708-3p           | 0.24                                 | 1.52                           | 1.07E-02       | 0.94                    |
| mir-3p          | hsa-miR-495-3p           | 0.23                                 | 2.88                           | 1.08E-02       | 0.94                    |
| rRNA            | LSU-rRNA_Hsa-L212        | -0.16                                | 3.25                           | 1.19E-02       | 0.94                    |
| piRNA           | piR-35468                | -0.21                                | 4.14                           | 1.20E-02       | 0.94                    |
| snoRNA          | E2                       | -0.33                                | 2.14                           | 1.34E-02       | 0.96                    |
| snRNA           | U2-L166                  | -0.39                                | 3.45                           | 1.37E-02       | 0.96                    |
| rRNA            | LSU-rRNA_Hsa-L67         | -0.26                                | 3.16                           | 1.50E-02       | 0.96                    |
| mir-3p          | hsa-miR-3150b-3p         | 0.24                                 | 1.47                           | 1.52E-02       | 0.96                    |
| snRNA           | U2-L288                  | -0.21                                | 2.57                           | 1.63E-02       | 0.96                    |
| mir-3p          | hsa-miR-3591-3p          | 0.16                                 | 12.23                          | 1.68E-02       | 0.96                    |
| snoRNA          | U64                      | -0.24                                | 2.08                           | 1.78E-02       | 0.96                    |
| snRNA           | U7-L52                   | -0.15                                | 6.84                           | 1.86E-02       | 0.96                    |
| scRNA           | HY1-L175                 | 0.19                                 | 2.06                           | 1.88E-02       | 0.96                    |
| tRNA            | chr6.tRNA74-LeuCAA       | -0.22                                | 2.43                           | 2.02E-02       | 0.96                    |
| snRNA           | U3-L205                  | -0.13                                | 4.79                           | 2.03E-02       | 0.96                    |
| scRNA           | BC200-L146               | -0.25                                | 2.61                           | 2.05E-02       | 0.96                    |
| tRNA            | chr2.tRNA27-GlyCCC       | -0.14                                | 8.80                           | 2.06E-02       | 0.96                    |
| mir-5p          | hsa-miR-3614-5p          | -0.25                                | 1.91                           | 2.20E-02       | 0.96                    |
| rRNA            | SSU-rRNA_Hsa-L25         | -0.14                                | 4.08                           | 2.30E-02       | 0.96                    |
| snRNA           | U3-L75                   | -0.24                                | 3.12                           | 2.34E-02       | 0.96                    |
| snoRNA          | U15B                     | -0.27                                | 2.19                           | 2.39E-02       | 0.96                    |
| snoRNA          | U45C                     | -0.24                                | 2.62                           | 2.39E-02       | 0.96                    |
| scRNA           | HY1-L409                 | 0.14                                 | 2.73                           | 2.62E-02       | 0.98                    |
| tRNA            | chr17.tRNA17-SupTTA      | -0.22                                | 2.90                           | 2.69E-02       | 0.98                    |

|            |                            |       |       |          |      |
|------------|----------------------------|-------|-------|----------|------|
| snoRNA     | ACA21                      | 0.20  | 2.76  | 2.80E-02 | 0.98 |
| mir-5p3pno | hsa-miR-1468               | -0.22 | 2.31  | 2.82E-02 | 0.98 |
| mir-5p3pno | hsa-miR-103b-L2            | -0.14 | 3.90  | 2.92E-02 | 0.98 |
| scRNA      | BC200-L10                  | -0.20 | 2.65  | 2.94E-02 | 0.98 |
| tRF3       | chr9.tRNA6-AspGTC-tRF3     | 0.21  | 1.45  | 2.95E-02 | 0.98 |
| scRNA      | BC200-L149                 | -0.27 | 1.76  | 2.97E-02 | 0.98 |
| rRNA       | LSU-rRNA_Hsa-L151          | 0.15  | 3.12  | 3.05E-02 | 0.99 |
| snRNA      | U5-L108                    | -0.23 | 2.23  | 3.46E-02 | 1.00 |
| mir-5p     | hsa-let-7g-5p              | -0.09 | 11.06 | 3.52E-02 | 1.00 |
| rRNA       | LSU-rRNA_Hsa-L58           | -0.10 | 7.02  | 3.53E-02 | 1.00 |
| snRNA      | U6-L1561                   | -0.28 | 2.12  | 3.62E-02 | 1.00 |
| mir-5p     | hsa-let-7i-5p              | -0.07 | 12.19 | 3.91E-02 | 1.00 |
| mir-3p     | hsa-miR-499b-3p            | 0.13  | 3.26  | 3.93E-02 | 1.00 |
| snRNA      | U1-L78                     | -0.24 | 1.40  | 4.10E-02 | 1.00 |
| mir-5p     | hsa-miR-3158-5p-L2         | 0.24  | 1.49  | 4.11E-02 | 1.00 |
| scRNA      | BC200-L76                  | 0.16  | 2.55  | 4.26E-02 | 1.00 |
| scRNA      | BC200-L82                  | -0.23 | 1.75  | 4.29E-02 | 1.00 |
| piRNA      | piR-61465                  | 0.13  | 3.75  | 4.41E-02 | 1.00 |
| tRNA       | chr16.tRNA7-LysCTT         | 0.15  | 2.24  | 4.59E-02 | 1.00 |
| scRNA      | BC200-L7                   | -0.22 | 2.61  | 4.67E-02 | 1.00 |
| snoRNA     | U50                        | -0.15 | 5.82  | 4.80E-02 | 1.00 |
| mir-3p     | hsa-miR-29c-3p             | 0.17  | 1.99  | 4.95E-02 | 1.00 |
| rRNA       | LSU-rRNA_Hsa-L389          | -0.10 | 10.71 | 4.97E-02 | 1.00 |
| rRNA       | LSU-rRNA_Hsa-L31           | -0.12 | 7.70  | 4.99E-02 | 1.00 |
| snoRNA     | U58C                       | -0.21 | 3.37  | 5.08E-02 | 1.00 |
| rRNA       | 5S-L1071                   | -0.19 | 1.54  | 5.18E-02 | 1.00 |
| rRNA       | LSU-rRNA_Hsa-L185          | -0.17 | 2.41  | 5.31E-02 | 1.00 |
| snoRNA     | U90                        | 0.16  | 2.75  | 5.39E-02 | 1.00 |
| rRNA       | LSU-rRNA_Hsa-L84           | -0.18 | 2.85  | 5.40E-02 | 1.00 |
| snRNA      | U2-L1058                   | -0.15 | 6.70  | 5.59E-02 | 1.00 |
| piRNA      | piR-35952-L5               | -0.19 | 2.44  | 5.61E-02 | 1.00 |
| scRNA      | BC200-L138                 | -0.13 | 4.89  | 5.80E-02 | 1.00 |
| snoRNA     | U47                        | -0.21 | 3.87  | 5.82E-02 | 1.00 |
| tRNA       | chr1.tRNA81-AspGTC         | -0.15 | 4.35  | 5.82E-02 | 1.00 |
| snoRNA     | U46                        | 0.12  | 4.48  | 5.85E-02 | 1.00 |
| tRNA       | chr1.tRNA85-ValCAC         | -0.13 | 3.44  | 5.88E-02 | 1.00 |
| mir-3p     | hsa-miR-181a-3p            | 0.14  | 2.62  | 5.96E-02 | 1.00 |
| tRNA       | chr14.tRNA19-TyrGTA        | -0.19 | 2.52  | 6.26E-02 | 1.00 |
| tRF3       | chr19.tRNA9-PseudoTTT-tRF3 | -0.24 | 1.65  | 6.31E-02 | 1.00 |
| tRNA       | chr6.tRNA38-IleAAT         | -0.30 | 3.15  | 6.33E-02 | 1.00 |
| snoRNA     | U81                        | -0.16 | 6.27  | 6.38E-02 | 1.00 |
| tRF5       | chr17.tRNA31-AsnGTT-tRF5   | -0.17 | 2.92  | 6.47E-02 | 1.00 |
| snoRNA     | U51                        | -0.22 | 2.71  | 6.50E-02 | 1.00 |

|        |                          |       |       |          |      |
|--------|--------------------------|-------|-------|----------|------|
| piRNA  | piR-35284                | -0.11 | 8.07  | 6.58E-02 | 1.00 |
| scRNA  | BC200-L54                | -0.13 | 4.73  | 6.65E-02 | 1.00 |
| piRNA  | piR-49143                | -0.06 | 11.96 | 6.67E-02 | 1.00 |
| rRNA   | 5S-L136                  | -0.20 | 1.53  | 6.67E-02 | 1.00 |
| snoRNA | U58B                     | 0.12  | 4.91  | 6.76E-02 | 1.00 |
| mir-5p | hsa-miR-330-5p           | 0.17  | 1.63  | 6.86E-02 | 1.00 |
| mir-5p | hsa-miR-452-5p           | -0.24 | 1.74  | 6.93E-02 | 1.00 |
| tRF3   | chr16.tRNA11-ProAGG-tRF3 | -0.20 | 1.79  | 6.97E-02 | 1.00 |
| piRNA  | piR-33468                | 0.19  | 1.61  | 6.98E-02 | 1.00 |
| mir-3p | hsa-miR-3158-3p          | -0.12 | 3.71  | 7.06E-02 | 1.00 |
| tRF5   | chr6.tRNA109-PheGAA-tRF5 | 0.23  | 2.26  | 7.11E-02 | 1.00 |
| tRF3   | chr17.tRNA13-GlyCCC-tRF3 | -0.11 | 5.22  | 7.29E-02 | 1.00 |
| tRNA   | chr6.tRNA63-IleTAT       | 0.17  | 1.53  | 7.31E-02 | 1.00 |
| mir-5p | hsa-let-7f-5p-L2         | -0.07 | 6.10  | 7.32E-02 | 1.00 |
| snRNA  | U1-L38                   | 0.19  | 1.64  | 7.53E-02 | 1.00 |
| snRNA  | U2-L205                  | -0.26 | 1.72  | 7.59E-02 | 1.00 |
| piRNA  | piR-35982-L6             | -0.22 | 1.98  | 7.63E-02 | 1.00 |
| snoRNA | ACA53                    | 0.19  | 3.01  | 7.63E-02 | 1.00 |
| tRNA   | chr19.tRNA8-SeCTCA       | 0.07  | 5.86  | 7.64E-02 | 1.00 |
| rRNA   | 5S-L762                  | -0.09 | 4.86  | 7.67E-02 | 1.00 |
| tRF5   | chr4.tRNA3-CysGCA-tRF5   | 0.19  | 1.61  | 7.69E-02 | 1.00 |
| mir-5p | hsa-miR-183-5p           | -0.09 | 7.53  | 7.73E-02 | 1.00 |
| scRNA  | BC200-L155               | -0.18 | 2.70  | 7.86E-02 | 1.00 |
| scRNA  | HY1-L439                 | -0.12 | 2.44  | 7.89E-02 | 1.00 |
| tRNA   | chr19.tRNA2-GlyTCC       | 0.11  | 4.14  | 7.91E-02 | 1.00 |
| scRNA  | BC200-L23                | 0.15  | 3.06  | 8.03E-02 | 1.00 |
| mir-5p | hsa-miR-485-5p           | 0.13  | 4.20  | 8.12E-02 | 1.00 |
| mir-3p | hsa-miR-324-3p           | -0.18 | 1.81  | 8.23E-02 | 1.00 |
| scRNA  | HY1-L302                 | -0.12 | 2.49  | 8.35E-02 | 1.00 |
| tRNA   | chr1.tRNA15-GlnCTG       | -0.12 | 2.98  | 8.60E-02 | 1.00 |
| mir-5p | hsa-miR-574-5p           | 0.09  | 4.85  | 8.62E-02 | 1.00 |
| tRNA   | chr11.tRNA13-PheGAA      | -0.17 | 3.60  | 8.66E-02 | 1.00 |
| rRNA   | 5S-L303                  | -0.19 | 2.33  | 8.95E-02 | 1.00 |
| mir-5p | hsa-miR-9-5p-L3          | -0.13 | 3.09  | 9.19E-02 | 1.00 |
| scRNA  | HY1-L133                 | 0.10  | 2.77  | 9.28E-02 | 1.00 |
| snoRNA | U45A                     | -0.14 | 4.15  | 9.34E-02 | 1.00 |
| tRNA   | chr16.tRNA24-GlyGCC      | -0.07 | 15.82 | 9.49E-02 | 1.00 |
| rRNA   | LSU-rRNA_Hsa-L139        | -0.06 | 14.15 | 0.10     | 1.00 |
| scRNA  | HY4-L154                 | -0.20 | 1.53  | 0.10     | 1.00 |
| piRNA  | piR-62011                | -0.08 | 8.25  | 0.10     | 1.00 |
| mir-5p | hsa-miR-3173-5p          | -0.19 | 2.41  | 0.10     | 1.00 |
| snoRNA | E3                       | -0.12 | 2.66  | 0.10     | 1.00 |
| scRNA  | HY4-L127                 | -0.07 | 11.00 | 0.10     | 1.00 |

|            |                         |       |       |      |      |
|------------|-------------------------|-------|-------|------|------|
| mir-5p     | hsa-miR-98-5p           | -0.08 | 6.17  | 0.10 | 1.00 |
| mir-5p     | hsa-miR-23a-5p          | 0.14  | 1.78  | 0.10 | 1.00 |
| tRNA       | chr6.tRNA129-MetCAT     | -0.10 | 5.33  | 0.10 | 1.00 |
| scRNA      | HY4-L103                | -0.11 | 4.44  | 0.10 | 1.00 |
| mir-5p     | hsa-miR-550a-3-5p       | -0.18 | 1.55  | 0.10 | 1.00 |
| piRNA      | piR-36742               | 0.08  | 5.15  | 0.10 | 1.00 |
| piRNA      | piR-52041               | -0.15 | 1.91  | 0.10 | 1.00 |
| tRNA       | chr6.tRNA153-IleAAT     | 0.17  | 1.68  | 0.10 | 1.00 |
| rRNA       | 5S-L955                 | -0.16 | 1.52  | 0.10 | 1.00 |
| snoRNA     | HBI-115                 | -0.25 | 2.00  | 0.10 | 1.00 |
| scRNA      | BC200-L129              | 0.15  | 2.19  | 0.10 | 1.00 |
| tRF5       | chr19.tRNA5-LysCTT-tRF5 | -0.15 | 4.33  | 0.11 | 1.00 |
| scRNA      | HY5                     | 0.15  | 1.57  | 0.11 | 1.00 |
| rRNA       | LSU-rRNA_Hsa-L346       | -0.15 | 1.67  | 0.11 | 1.00 |
| tRNA       | chr6.tRNA36-ArgACG      | -0.23 | 1.39  | 0.11 | 1.00 |
| snoRNA     | U83                     | -0.16 | 2.97  | 0.11 | 1.00 |
| tRNA       | chr1.tRNA131-GlyCCC     | -0.15 | 7.00  | 0.11 | 1.00 |
| snRNA      | U1-L33                  | -0.14 | 2.56  | 0.11 | 1.00 |
| tRNA       | chr12.tRNA4-AspGTC      | -0.13 | 4.64  | 0.11 | 1.00 |
| rRNA       | LSU-rRNA_Hsa-L4         | -0.08 | 8.09  | 0.11 | 1.00 |
| mir-5p     | hsa-miR-339-5p          | -0.22 | 1.85  | 0.11 | 1.00 |
| snRNA      | U6-L9                   | 0.10  | 4.67  | 0.11 | 1.00 |
| scRNA      | BC200-L43               | -0.14 | 3.28  | 0.11 | 1.00 |
| piRNA      | piR-31925-L8            | -0.08 | 7.36  | 0.11 | 1.00 |
| snoRNA     | U36B                    | -0.27 | 1.73  | 0.11 | 1.00 |
| rRNA       | 5S-L1179                | 0.15  | 1.46  | 0.11 | 1.00 |
| tRF5       | chr6.tRNA56-PheGAA-tRF5 | -0.19 | 1.38  | 0.11 | 1.00 |
| scRNA      | HY4-L47                 | -0.12 | 2.67  | 0.11 | 1.00 |
| mir-5p3pno | hsa-miR-3909            | -0.17 | 1.71  | 0.12 | 1.00 |
| mir-3p     | hsa-miR-148a-3p         | 0.06  | 13.46 | 0.12 | 1.00 |
| mir-5p3pno | hsa-miR-326             | -0.15 | 1.98  | 0.12 | 1.00 |
| mir-3p     | hsa-miR-146b-3p         | -0.15 | 2.42  | 0.12 | 1.00 |
| mir-5p3pno | hsa-miR-1294            | -0.18 | 1.62  | 0.12 | 1.00 |
| rRNA       | LSU-rRNA_Hsa-L295       | 0.10  | 3.46  | 0.12 | 1.00 |
| tRF3       | chr1.tRNA55-LysTTT-tRF3 | -0.18 | 2.49  | 0.12 | 1.00 |
| mir-3p     | hsa-miR-374a-3p         | -0.08 | 3.84  | 0.12 | 1.00 |
| tRNA       | chr6.tRNA11-IleAAT      | -0.11 | 8.31  | 0.12 | 1.00 |
| mir-5p3pno | hsa-miR-4485            | 0.12  | 4.29  | 0.12 | 1.00 |
| scRNA      | HY5-L8                  | 0.10  | 3.89  | 0.12 | 1.00 |
| tRNA       | chr1.tRNA102-PseudoTTC  | -0.06 | 6.55  | 0.12 | 1.00 |
| snoRNA     | HBII-420                | -0.15 | 4.25  | 0.13 | 1.00 |
| scRNA      | BC200-L128              | -0.14 | 2.65  | 0.13 | 1.00 |
| mir-3p     | hsa-miR-23a-3p          | 0.08  | 6.59  | 0.13 | 1.00 |

|            |                             |       |       |      |      |
|------------|-----------------------------|-------|-------|------|------|
| rRNA       | LSU-rRNA_Hsa-L249           | 0.07  | 7.95  | 0.13 | 1.00 |
| tRNA       | chr6.tRNA133-ValCAC         | 0.10  | 2.93  | 0.13 | 1.00 |
| tRNA       | chr6.tRNA131-GlnCTG         | -0.19 | 1.62  | 0.13 | 1.00 |
| mir-5p     | hsa-miR-221-5p              | -0.11 | 3.85  | 0.13 | 1.00 |
| rRNA       | LSU-rRNA_Hsa-L298           | -0.14 | 3.46  | 0.13 | 1.00 |
| mir-5p     | hsa-miR-4732-5p             | 0.09  | 3.28  | 0.13 | 1.00 |
| snoRNA     | HBII-382                    | -0.23 | 2.17  | 0.13 | 1.00 |
| mir-3p     | hsa-miR-629-3p              | 0.16  | 1.42  | 0.13 | 1.00 |
| piRNA      | piR-31925-L9                | -0.07 | 13.82 | 0.13 | 1.00 |
| mir-5p     | hsa-miR-342-5p              | 0.07  | 6.55  | 0.13 | 1.00 |
| scRNA      | BC200-L147                  | 0.14  | 2.25  | 0.13 | 1.00 |
| rRNA       | LSU-rRNA_Hsa-L381           | -0.16 | 2.74  | 0.13 | 1.00 |
| snoRNA     | HBII-295                    | -0.17 | 3.05  | 0.14 | 1.00 |
| piRNA      | piR-43325-L2                | -0.16 | 2.33  | 0.14 | 1.00 |
| snoRNA     | U66                         | -0.19 | 1.79  | 0.14 | 1.00 |
| scRNA      | HY4-L139                    | -0.05 | 10.83 | 0.14 | 1.00 |
| mir-5p3pno | hsa-miR-4326                | -0.21 | 1.51  | 0.14 | 1.00 |
| tRF5       | chr1.tRNA125-PseudoGTT-tRF5 | -0.20 | 1.49  | 0.14 | 1.00 |
| snoRNA     | U21                         | -0.14 | 4.60  | 0.14 | 1.00 |
| scRNA      | HY4-L110                    | -0.19 | 1.99  | 0.14 | 1.00 |
| rRNA       | LSU-rRNA_Hsa-L34            | 0.15  | 1.35  | 0.14 | 1.00 |
| tRF5       | chr5.tRNA22-AspGTC-tRF5     | -0.16 | 2.30  | 0.14 | 1.00 |
| piRNA      | piR-43325-L7                | -0.13 | 3.82  | 0.14 | 1.00 |
| scRNA      | HY4-L6                      | -0.07 | 3.98  | 0.14 | 1.00 |
| scRNA      | BC200-L116                  | 0.13  | 2.42  | 0.14 | 1.00 |
| scRNA      | HY3-L82                     | 0.08  | 3.20  | 0.14 | 1.00 |
| tRF3       | chr3.tRNA10-PseudoCTC-tRF3  | -0.20 | 1.55  | 0.14 | 1.00 |
| tRNA       | chr1.tRNA2-GlyCCC           | -0.08 | 5.38  | 0.15 | 1.00 |
| mir-5p     | hsa-miR-30b-5p              | -0.14 | 2.47  | 0.15 | 1.00 |
| snoRNA     | U59B                        | -0.11 | 7.06  | 0.15 | 1.00 |
| scRNA      | HY3-L478                    | -0.07 | 8.12  | 0.15 | 1.00 |
| mir-5p3pno | hsa-miR-203a                | 0.18  | 2.28  | 0.15 | 1.00 |
| mir-3p     | hsa-miR-139-3p              | 0.09  | 3.31  | 0.15 | 1.00 |
| piRNA      | piR-48772-L2                | -0.17 | 1.95  | 0.15 | 1.00 |
| mir-5p3pno | hsa-miR-1976                | 0.12  | 1.89  | 0.15 | 1.00 |
| rRNA       | SSU-rRNA_Hsa-L74            | -0.08 | 6.51  | 0.15 | 1.00 |
| rRNA       | LSU-rRNA_Hsa-L73            | -0.13 | 2.19  | 0.15 | 1.00 |
| snoRNA     | U50B                        | -0.12 | 4.34  | 0.15 | 1.00 |
| scRNA      | BC200-L72                   | 0.16  | 1.58  | 0.16 | 1.00 |
| snoRNA     | U80                         | -0.16 | 3.36  | 0.16 | 1.00 |
| tRNA       | chr17.tRNA5-GlyGCC          | -0.06 | 7.52  | 0.16 | 1.00 |
| rRNA       | 5S-L990                     | -0.08 | 3.08  | 0.16 | 1.00 |
| scRNA      | HY4-L28                     | -0.06 | 6.48  | 0.16 | 1.00 |

|            |                         |       |       |      |      |
|------------|-------------------------|-------|-------|------|------|
| scRNA      | BC200-L151              | 0.13  | 2.08  | 0.16 | 1.00 |
| snoRNA     | U41                     | -0.17 | 2.48  | 0.16 | 1.00 |
| mir-3p     | hsa-miR-340-3p          | -0.10 | 4.29  | 0.16 | 1.00 |
| scRNA      | BC200-L91               | -0.18 | 1.97  | 0.16 | 1.00 |
| mir-5p3pno | hsa-miR-133a            | 0.16  | 1.55  | 0.16 | 1.00 |
| scRNA      | BC200-L135              | -0.14 | 2.24  | 0.16 | 1.00 |
| tRF3       | chr6.tRNA37-ValAAC-tRF3 | -0.08 | 12.93 | 0.16 | 1.00 |
| scRNA      | HY4-L100                | -0.11 | 3.24  | 0.16 | 1.00 |
| rRNA       | 5S-L621                 | 0.14  | 1.23  | 0.16 | 1.00 |
| rRNA       | 5S-L1214                | 0.14  | 1.33  | 0.16 | 1.00 |
| snoRNA     | ACA36                   | -0.20 | 1.89  | 0.16 | 1.00 |
| tRNA       | chr8.tRNA5-TyrGTA       | -0.23 | 1.91  | 0.16 | 1.00 |
| mir-3p     | hsa-miR-181c-3p         | 0.14  | 1.57  | 0.17 | 1.00 |
| mir-5p3pno | hsa-miR-4447            | -0.19 | 1.30  | 0.17 | 1.00 |
| mir-5p3pno | hsa-miR-134             | 0.08  | 6.74  | 0.17 | 1.00 |
| rRNA       | LSU-rRNA_Hsa-L166       | -0.22 | 5.43  | 0.17 | 1.00 |
| mir-5p3pno | hsa-miR-889             | 0.12  | 2.82  | 0.17 | 1.00 |
| scRNA      | HY1-L342                | 0.16  | 1.37  | 0.17 | 1.00 |
| scRNA      | HY4-L159                | -0.07 | 4.46  | 0.17 | 1.00 |
| rRNA       | LSU-rRNA_Hsa-L252       | 0.08  | 2.99  | 0.17 | 1.00 |
| scRNA      | HY3-L287                | -0.13 | 1.40  | 0.17 | 1.00 |
| snoRNA     | U49B                    | -0.21 | 1.62  | 0.17 | 1.00 |
| snoRNA     | SNORD127                | -0.14 | 4.77  | 0.17 | 1.00 |
| tRNA       | chr14.tRNA16-TyrGTA     | -0.13 | 3.58  | 0.17 | 1.00 |
| tRNA       | chr1.tRNA137-Pseudo???  | -0.11 | 6.02  | 0.17 | 1.00 |
| snRNA      | U5-L133                 | 0.12  | 2.25  | 0.18 | 1.00 |
| tRF5       | chr20.tRNA6-LeuAAG-tRF5 | -0.11 | 3.01  | 0.18 | 1.00 |
| rRNA       | 5S-L126                 | -0.10 | 2.55  | 0.18 | 1.00 |
| mir-5p3pno | hsa-miR-3609            | -0.15 | 2.87  | 0.18 | 1.00 |
| rRNA       | SSU-rRNA_Hsa-L16        | -0.08 | 6.78  | 0.18 | 1.00 |
| scRNA      | BC200-L19               | -0.22 | 1.37  | 0.18 | 1.00 |
| rRNA       | 5S-L103                 | -0.11 | 3.03  | 0.18 | 1.00 |
| mir-3p     | hsa-miR-369-3p          | 0.15  | 1.38  | 0.18 | 1.00 |
| snoRNA     | ACA3                    | -0.12 | 2.48  | 0.18 | 1.00 |
| snoRNA     | U62B                    | -0.12 | 3.71  | 0.18 | 1.00 |
| piRNA      | piR-43771-L6            | 0.11  | 2.90  | 0.18 | 1.00 |
| mir-5p3pno | hsa-miR-378c            | -0.06 | 5.35  | 0.18 | 1.00 |
| snoRNA     | U35A                    | -0.19 | 1.80  | 0.18 | 1.00 |
| rRNA       | LSU-rRNA_Hsa-L323       | -0.08 | 8.20  | 0.18 | 1.00 |
| snRNA      | U1-L63                  | -0.12 | 2.53  | 0.18 | 1.00 |
| rRNA       | 5S-L1152                | -0.13 | 1.59  | 0.18 | 1.00 |
| snoRNA     | U84                     | -0.17 | 2.09  | 0.18 | 1.00 |
| rRNA       | LSU-rRNA_Hsa-L403       | -0.05 | 9.95  | 0.18 | 1.00 |

|            |                          |       |      |      |      |
|------------|--------------------------|-------|------|------|------|
| snoRNA     | U32A                     | -0.16 | 4.08 | 0.18 | 1.00 |
| rRNA       | 5S-L356                  | -0.07 | 5.32 | 0.18 | 1.00 |
| tRNA       | chr20.tRNA3-PseudoCAC    | 0.13  | 1.30 | 0.18 | 1.00 |
| mir-3p     | hsa-miR-4732-3p          | 0.13  | 2.44 | 0.18 | 1.00 |
| tRNA       | chr6.tRNA84-GlnTTG       | -0.19 | 1.52 | 0.19 | 1.00 |
| piRNA      | piR-33065                | 0.07  | 4.52 | 0.19 | 1.00 |
| tRNA       | chr16.tRNA25-GlyGCC      | -0.07 | 4.78 | 0.19 | 1.00 |
| snoRNA     | U96a                     | -0.14 | 3.47 | 0.19 | 1.00 |
| scRNA      | HY4-L37                  | -0.08 | 4.00 | 0.19 | 1.00 |
| mir-3p     | hsa-miR-3187-3p          | 0.14  | 1.63 | 0.19 | 1.00 |
| rRNA       | 5S-L1067                 | -0.09 | 2.57 | 0.19 | 1.00 |
| tRF5       | chr6.tRNA78-LeuAAG-tRF5  | 0.17  | 1.31 | 0.20 | 1.00 |
| snoRNA     | U103B                    | -0.16 | 3.29 | 0.20 | 1.00 |
| scRNA      | HY4-L136                 | -0.12 | 2.51 | 0.20 | 1.00 |
| scRNA      | BC200-L24                | 0.09  | 2.86 | 0.20 | 1.00 |
| rRNA       | 5S-L78                   | -0.10 | 2.69 | 0.20 | 1.00 |
| tRNA       | chr6.tRNA6-ArgACG        | -0.12 | 2.65 | 0.20 | 1.00 |
| tRNA       | chr1.tRNA88-PseudoCCT    | -0.07 | 6.19 | 0.20 | 1.00 |
| mir-3p     | hsa-miR-30e-3p           | -0.04 | 8.45 | 0.20 | 1.00 |
| scRNA      | BC200-L46                | -0.18 | 1.64 | 0.20 | 1.00 |
| scRNA      | HY4-L43                  | -0.10 | 2.22 | 0.20 | 1.00 |
| mir-3p     | hsa-miR-335-3p           | -0.12 | 3.66 | 0.20 | 1.00 |
| tRNA       | chr16.tRNA16-LeuAAG      | -0.11 | 3.29 | 0.20 | 1.00 |
| mir-5p     | hsa-miR-26b-5p           | -0.05 | 8.15 | 0.20 | 1.00 |
| tRNA       | chr5.tRNA14-ProTGG       | -0.07 | 4.85 | 0.21 | 1.00 |
| mir-5p3pno | hsa-miR-548k             | 0.12  | 1.89 | 0.21 | 1.00 |
| piRNA      | piR-33151-L9             | -0.08 | 3.44 | 0.21 | 1.00 |
| snRNA      | U6-L1696                 | -0.18 | 1.91 | 0.21 | 1.00 |
| tRNA       | chr17.tRNA20-MetCAT      | -0.17 | 1.87 | 0.21 | 1.00 |
| piRNA      | piR-61174                | -0.17 | 1.23 | 0.21 | 1.00 |
| rRNA       | 5S-L99                   | -0.06 | 8.58 | 0.21 | 1.00 |
| snoRNA     | U43                      | 0.08  | 4.95 | 0.21 | 1.00 |
| tRF5       | chr9.tRNA6-AspGTC-tRF5   | 0.10  | 2.90 | 0.21 | 1.00 |
| snoRNA     | HBII-99                  | 0.09  | 4.90 | 0.21 | 1.00 |
| tRF5       | chr1.tRNA130-ValCAC-tRF5 | 0.11  | 2.38 | 0.21 | 1.00 |
| snRNA      | U1-L24                   | -0.11 | 2.67 | 0.21 | 1.00 |
| tRNA       | chr14.tRNA23-ProAGG      | -0.13 | 2.14 | 0.21 | 1.00 |
| scRNA      | HY1-L269                 | -0.11 | 1.88 | 0.21 | 1.00 |
| rRNA       | LSU-rRNA_Hsa-L367        | -0.05 | 7.90 | 0.21 | 1.00 |
| piRNA      | piR-41209                | 0.09  | 2.58 | 0.21 | 1.00 |
| mir-5p3pno | hsa-miR-618              | 0.11  | 2.72 | 0.21 | 1.00 |
| scRNA      | BC200-L134               | 0.14  | 1.43 | 0.22 | 1.00 |
| snRNA      | U3-L74                   | -0.17 | 2.45 | 0.22 | 1.00 |



|            |                         |       |       |      |      |
|------------|-------------------------|-------|-------|------|------|
| rRNA       | SSU-rRNA_Hsa-L46        | -0.08 | 6.10  | 0.22 | 1.00 |
| scRNA      | BC200-L159              | -0.16 | 1.51  | 0.22 | 1.00 |
| rRNA       | LSU-rRNA_Hsa-L305       | -0.09 | 5.25  | 0.22 | 1.00 |
| tRNA       | chr1.tRNA96-PseudoCCT   | -0.06 | 8.20  | 0.22 | 1.00 |
| mir-3p     | hsa-miR-136-3p          | 0.11  | 2.62  | 0.22 | 1.00 |
| piRNA      | piR-38600               | 0.11  | 3.94  | 0.22 | 1.00 |
| snoRNA     | HBI-61                  | -0.17 | 3.49  | 0.22 | 1.00 |
| tRNA       | chr16.tRNA4-ProAGG      | 0.09  | 2.50  | 0.22 | 1.00 |
| scRNA      | HY1-L326                | -0.15 | 1.43  | 0.22 | 1.00 |
| piRNA      | piR-31447               | 0.14  | 1.47  | 0.22 | 1.00 |
| tRF3       | chr6.tRNA61-MetCAT-tRF3 | -0.14 | 2.23  | 0.22 | 1.00 |
| snRNA      | U2-L481                 | -0.17 | 1.44  | 0.22 | 1.00 |
| mir-3p     | hsa-miR-92a-3p          | -0.05 | 11.39 | 0.22 | 1.00 |
| snoRNA     | mgh28S-2409             | -0.15 | 3.15  | 0.22 | 1.00 |
| tRNA       | chr1.tRNA134-GluTTC     | -0.04 | 7.45  | 0.23 | 1.00 |
| mir-5p     | hsa-miR-148a-5p         | 0.07  | 4.17  | 0.23 | 1.00 |
| scRNA      | HY3-L372                | -0.13 | 2.47  | 0.23 | 1.00 |
| mir-3p     | hsa-miR-144-3p          | -0.07 | 5.77  | 0.23 | 1.00 |
| mir-5p     | hsa-miR-27b-5p          | 0.12  | 1.72  | 0.23 | 1.00 |
| piRNA      | piR-31925               | -0.05 | 11.30 | 0.23 | 1.00 |
| rRNA       | 5S-L530                 | -0.12 | 5.17  | 0.23 | 1.00 |
| scRNA      | HY4-L146                | -0.11 | 1.61  | 0.23 | 1.00 |
| snoRNA     | HBII-85-10              | -0.12 | 1.77  | 0.23 | 1.00 |
| mir-5p     | hsa-miR-3613-5p         | 0.06  | 4.64  | 0.23 | 1.00 |
| mir-5p     | hsa-miR-100-5p          | 0.05  | 6.59  | 0.23 | 1.00 |
| snoRNA     | U37                     | -0.21 | 1.76  | 0.23 | 1.00 |
| mir-5p3pno | hsa-miR-152             | -0.06 | 5.59  | 0.23 | 1.00 |
| tRNA       | chr16.tRNA19-GlyGCC     | -0.18 | 1.88  | 0.23 | 1.00 |
| scRNA      | HY1-L37                 | -0.06 | 6.31  | 0.23 | 1.00 |
| rRNA       | LSU-rRNA_Hsa-L304       | -0.14 | 2.50  | 0.23 | 1.00 |
| piRNA      | piR-34536               | 0.07  | 5.56  | 0.23 | 1.00 |
| piRNA      | piR-49144               | -0.05 | 7.05  | 0.23 | 1.00 |
| rRNA       | 5S-L363                 | -0.13 | 1.50  | 0.24 | 1.00 |
| tRNA       | chr2.tRNA3-AlaAGC       | 0.10  | 3.59  | 0.24 | 1.00 |
| tRF5       | chr14.tRNA4-ThrTGT-tRF5 | -0.11 | 2.23  | 0.24 | 1.00 |
| mir-3p     | hsa-miR-145-3p          | 0.05  | 4.84  | 0.24 | 1.00 |
| mir-5p     | hsa-miR-532-5p          | -0.04 | 7.72  | 0.24 | 1.00 |
| snRNA      | U1-L71                  | -0.07 | 5.05  | 0.24 | 1.00 |
| mir-5p     | hsa-miR-3606-5p         | -0.17 | 2.63  | 0.24 | 1.00 |
| tRNA       | chr6.tRNA87-GluCTC      | -0.04 | 15.82 | 0.24 | 1.00 |
| mir-5p     | hsa-miR-155-5p          | -0.06 | 4.35  | 0.24 | 1.00 |
| snRNA      | U17-L2                  | -0.15 | 2.12  | 0.24 | 1.00 |
| mir-5p     | hsa-miR-199a-5p         | -0.06 | 6.35  | 0.24 | 1.00 |

|            |                             |       |       |      |      |
|------------|-----------------------------|-------|-------|------|------|
| mir-3p     | hsa-miR-27a-3p              | 0.04  | 10.82 | 0.24 | 1.00 |
| scRNA      | BC200-L32                   | -0.14 | 2.06  | 0.24 | 1.00 |
| scRNA      | HY3-L479                    | -0.14 | 2.10  | 0.24 | 1.00 |
| piRNA      | piR-61298                   | -0.16 | 1.91  | 0.25 | 1.00 |
| snRNA      | U3-L18                      | 0.08  | 6.00  | 0.25 | 1.00 |
| snRNA      | U14-L5                      | -0.08 | 4.24  | 0.25 | 1.00 |
| mir-5p3pno | hsa-miR-95                  | -0.08 | 2.72  | 0.25 | 1.00 |
| mir-3p     | hsa-miR-25-3p               | -0.04 | 12.18 | 0.25 | 1.00 |
| scRNA      | BC200-L36                   | -0.12 | 2.68  | 0.25 | 1.00 |
| snoRNA     | U92                         | -0.09 | 2.16  | 0.25 | 1.00 |
| scRNA      | HY1-L183                    | 0.07  | 2.44  | 0.25 | 1.00 |
| tRF5       | chr6.tRNA114-ArgCCG-tRF5    | -0.13 | 1.61  | 0.25 | 1.00 |
| rRNA       | LSU-rRNA_Hsa-L283           | -0.13 | 2.10  | 0.25 | 1.00 |
| tRNA       | chr1.tRNA72-AspGTC          | -0.07 | 7.23  | 0.25 | 1.00 |
| mir-3p     | hsa-miR-502-3p              | 0.10  | 2.26  | 0.25 | 1.00 |
| mir-3p     | hsa-miR-3529-3p             | -0.04 | 7.65  | 0.25 | 1.00 |
| rRNA       | LSU-rRNA_Hsa-L63            | -0.19 | 4.97  | 0.25 | 1.00 |
| snRNA      | U1-L7                       | -0.05 | 6.15  | 0.25 | 1.00 |
| snRNA      | U2-L1061                    | -0.10 | 11.07 | 0.25 | 1.00 |
| tRNA       | chr17.tRNA13-GlyCCC         | -0.06 | 5.81  | 0.26 | 1.00 |
| mir-5p     | hsa-miR-744-5p              | -0.05 | 6.54  | 0.26 | 1.00 |
| rRNA       | SSU-rRNA_Hsa-L65            | -0.07 | 4.28  | 0.26 | 1.00 |
| tRF3       | chr2.tRNA21-SerTGA-tRF3     | 0.11  | 2.33  | 0.26 | 1.00 |
| mir-5p     | hsa-miR-99a-5p              | 0.06  | 7.41  | 0.26 | 1.00 |
| snRNA      | U2-L285                     | -0.12 | 2.96  | 0.26 | 1.00 |
| piRNA      | piR-35548-L3                | 0.11  | 2.78  | 0.26 | 1.00 |
| mir-3p     | hsa-miR-19b-3p              | 0.07  | 4.04  | 0.26 | 1.00 |
| piRNA      | piR-35411-L4                | 0.09  | 2.53  | 0.26 | 1.00 |
| mir-3p     | hsa-miR-3913-3p             | 0.11  | 1.59  | 0.26 | 1.00 |
| tRF3       | chr18.tRNA2-PseudoTCC-tRF3  | -0.11 | 3.09  | 0.26 | 1.00 |
| tRF5       | chr1.tRNA132-PseudoCAC-tRF5 | -0.13 | 2.10  | 0.26 | 1.00 |
| snoRNA     | U52                         | -0.11 | 2.73  | 0.26 | 1.00 |
| scRNA      | HY4-L41                     | 0.08  | 1.86  | 0.26 | 1.00 |
| rRNA       | LSU-rRNA_Hsa-L339           | -0.15 | 2.35  | 0.26 | 1.00 |
| tRNA       | chr14.tRNA8-CysGCA          | -0.18 | 4.27  | 0.26 | 1.00 |
| tRNA       | chr1.tRNA106-HisGTG         | -0.06 | 3.36  | 0.26 | 1.00 |
| mir-5p     | hsa-miR-26a-5p-L2           | -0.04 | 10.75 | 0.26 | 1.00 |
| scRNA      | HY1-L435                    | 0.06  | 3.49  | 0.27 | 1.00 |
| snoRNA     | U13-L162                    | -0.12 | 2.03  | 0.27 | 1.00 |
| rRNA       | LSU-rRNA_Hsa-L64            | -0.12 | 1.52  | 0.27 | 1.00 |
| mir-5p3pno | hsa-miR-1301                | -0.06 | 4.06  | 0.27 | 1.00 |
| snRNA      | U1-L11                      | -0.10 | 3.90  | 0.27 | 1.00 |
| tRF5       | chr18.tRNA3-PseudoTCC-tRF5  | -0.17 | 1.35  | 0.27 | 1.00 |

|            |                             |       |       |      |      |
|------------|-----------------------------|-------|-------|------|------|
| snoRNA     | U30                         | 0.08  | 6.13  | 0.27 | 1.00 |
| scRNA      | HY4-L135                    | -0.04 | 18.67 | 0.27 | 1.00 |
| mir-3p     | hsa-miR-17-3p               | -0.12 | 1.53  | 0.27 | 1.00 |
| tRF5       | chr17.tRNA33-PseudoTTG-tRF5 | -0.07 | 5.92  | 0.27 | 1.00 |
| mir-5p     | hsa-miR-15b-5p              | -0.08 | 2.72  | 0.27 | 1.00 |
| mir-3p     | hsa-miR-3177-3p             | 0.10  | 1.68  | 0.27 | 1.00 |
| tRNA       | chr2.tRNA25-PseudoCTC       | -0.04 | 8.69  | 0.27 | 1.00 |
| rRNA       | 5S-L1262                    | -0.17 | 1.38  | 0.27 | 1.00 |
| tRNA       | chr3.tRNA7-CysGCA           | -0.12 | 1.80  | 0.28 | 1.00 |
| rRNA       | LSU-rRNA_Hsa-L66            | -0.12 | 1.87  | 0.28 | 1.00 |
| mir-5p     | hsa-miR-186-5p              | -0.06 | 6.23  | 0.28 | 1.00 |
| mir-3p     | hsa-miR-424-3p              | 0.06  | 4.70  | 0.28 | 1.00 |
| mir-3p     | hsa-miR-3613-3p             | -0.14 | 1.73  | 0.28 | 1.00 |
| tRNA       | chr17.tRNA41-SerCGA         | -0.15 | 2.38  | 0.28 | 1.00 |
| rRNA       | LSU-rRNA_Hsa-L60            | 0.05  | 12.44 | 0.29 | 1.00 |
| rRNA       | LSU-rRNA_Hsa-L18            | -0.07 | 5.98  | 0.29 | 1.00 |
| tRNA       | chr1.tRNA39-GlyGCC          | -0.04 | 11.35 | 0.29 | 1.00 |
| piRNA      | piR-52416                   | -0.17 | 1.72  | 0.29 | 1.00 |
| snoRNA     | ACA66                       | -0.15 | 2.24  | 0.29 | 1.00 |
| snRNA      | U14-L3                      | -0.15 | 1.49  | 0.29 | 1.00 |
| tRNA       | chr1.tRNA99-ValCAC          | -0.05 | 8.58  | 0.29 | 1.00 |
| mir-5p     | hsa-miR-345-5p              | -0.10 | 2.70  | 0.29 | 1.00 |
| mir-3p     | hsa-miR-221-3p              | -0.05 | 7.16  | 0.29 | 1.00 |
| rRNA       | 5S-L586                     | -0.09 | 2.14  | 0.29 | 1.00 |
| tRNA       | chr2.tRNA17-PseudoTTC       | -0.05 | 7.07  | 0.29 | 1.00 |
| rRNA       | LSU-rRNA_Hsa-L348           | -0.11 | 1.92  | 0.29 | 1.00 |
| tRNA       | chr1.tRNA43-GlyGCC          | -0.06 | 6.87  | 0.29 | 1.00 |
| mir-5p     | hsa-miR-3605-5p             | 0.09  | 2.60  | 0.29 | 1.00 |
| scRNA      | BC200-L12                   | -0.17 | 1.72  | 0.29 | 1.00 |
| mir-5p3pno | hsa-miR-421                 | -0.07 | 2.77  | 0.29 | 1.00 |
| mir-3p     | hsa-miR-200b-3p             | -0.11 | 1.87  | 0.29 | 1.00 |
| tRNA       | chr6.tRNA123-SerGCT         | -0.10 | 2.23  | 0.30 | 1.00 |
| rRNA       | 5S-L815                     | -0.08 | 2.57  | 0.30 | 1.00 |
| mir-5p     | hsa-miR-17-5p               | -0.06 | 5.08  | 0.30 | 1.00 |
| tRNA       | chr6.tRNA152-ValCAC         | -0.05 | 8.52  | 0.30 | 1.00 |
| snoRNA     | HBII-429                    | -0.10 | 4.20  | 0.30 | 1.00 |
| piRNA      | piR-31986                   | 0.06  | 8.37  | 0.30 | 1.00 |
| mir-3p     | hsa-miR-29b-3p              | -0.09 | 2.25  | 0.30 | 1.00 |
| snoRNA     | HBII-276                    | -0.11 | 3.49  | 0.30 | 1.00 |
| snoRNA     | U85                         | -0.09 | 3.06  | 0.30 | 1.00 |
| piRNA      | piR-32950                   | 0.05  | 6.31  | 0.30 | 1.00 |
| snoRNA     | U23                         | -0.14 | 1.46  | 0.30 | 1.00 |
| snRNA      | U14-L2                      | -0.14 | 1.79  | 0.30 | 1.00 |

|            |                          |       |      |      |      |
|------------|--------------------------|-------|------|------|------|
| scRNA      | HY4-L58                  | -0.05 | 3.81 | 0.30 | 1.00 |
| rRNA       | 5S-L21                   | 0.07  | 2.71 | 0.31 | 1.00 |
| scRNA      | HY4-L49                  | -0.14 | 1.27 | 0.31 | 1.00 |
| snoRNA     | ACA8                     | -0.13 | 2.21 | 0.31 | 1.00 |
| snRNA      | U1-L4                    | -0.07 | 8.27 | 0.31 | 1.00 |
| mir-5p     | hsa-miR-28-5p            | -0.05 | 5.10 | 0.31 | 1.00 |
| mir-3p     | hsa-miR-4446-3p          | -0.07 | 3.56 | 0.31 | 1.00 |
| tRNA       | chr6.tRNA148-SerTGA      | -0.12 | 3.56 | 0.31 | 1.00 |
| mir-3p     | hsa-miR-222-3p           | -0.04 | 8.33 | 0.31 | 1.00 |
| tRNA       | chr3.tRNA10-PseudoCTC    | -0.04 | 7.60 | 0.31 | 1.00 |
| rRNA       | 5S-L946                  | -0.04 | 9.07 | 0.31 | 1.00 |
| mir-5p     | hsa-miR-548ay-5p         | -0.10 | 2.18 | 0.31 | 1.00 |
| snRNA      | U2-L63                   | -0.09 | 2.16 | 0.31 | 1.00 |
| scRNA      | HY3-L239                 | -0.12 | 1.81 | 0.32 | 1.00 |
| tRNA       | chr6.tRNA73-ArgCCG       | -0.10 | 2.37 | 0.32 | 1.00 |
| piRNA      | piR-37525                | -0.15 | 1.54 | 0.32 | 1.00 |
| scRNA      | HY3-L382                 | 0.12  | 1.28 | 0.32 | 1.00 |
| scRNA      | HY4-L98                  | -0.03 | 9.97 | 0.32 | 1.00 |
| mir-5p     | hsa-miR-432-5p           | 0.08  | 5.13 | 0.32 | 1.00 |
| mir-5p     | hsa-miR-23b-5p           | -0.13 | 1.51 | 0.32 | 1.00 |
| rRNA       | LSU-rRNA_Hsa-L174        | 0.09  | 1.61 | 0.32 | 1.00 |
| scRNA      | HY4-L46                  | -0.04 | 9.09 | 0.32 | 1.00 |
| scRNA      | BC200-L73                | -0.09 | 2.27 | 0.32 | 1.00 |
| snoRNA     | U38A                     | -0.10 | 4.22 | 0.32 | 1.00 |
| mir-5p     | hsa-miR-223-5p           | 0.05  | 8.71 | 0.32 | 1.00 |
| snRNA      | U1-L17                   | 0.16  | 1.82 | 0.33 | 1.00 |
| tRF3       | chr3.tRNA2-ValAAC-tRF3   | -0.07 | 4.15 | 0.33 | 1.00 |
| piRNA      | piR-33082-L2             | 0.09  | 1.78 | 0.33 | 1.00 |
| tRF5       | chr11.tRNA16-ValTAC-tRF5 | 0.12  | 1.57 | 0.33 | 1.00 |
| snoRNA     | U29                      | 0.07  | 5.29 | 0.33 | 1.00 |
| tRNA       | chr1.tRNA116-GluCTC      | -0.06 | 3.79 | 0.33 | 1.00 |
| mir-5p     | hsa-miR-2115-5p          | -0.12 | 1.27 | 0.33 | 1.00 |
| mir-5p     | hsa-miR-106b-5p          | -0.06 | 3.53 | 0.33 | 1.00 |
| mir-5p     | hsa-miR-340-5p           | -0.05 | 6.42 | 0.33 | 1.00 |
| scRNA      | HY1-L45                  | -0.11 | 1.90 | 0.33 | 1.00 |
| mir-5p     | hsa-miR-4787-5p          | 0.11  | 1.33 | 0.33 | 1.00 |
| snoRNA     | U59A                     | 0.07  | 6.70 | 0.33 | 1.00 |
| mir-3p     | hsa-miR-378a-3p          | -0.03 | 8.57 | 0.33 | 1.00 |
| mir-5p3pno | hsa-miR-433              | 0.08  | 3.46 | 0.33 | 1.00 |
| scRNA      | HY4-L18                  | 0.09  | 1.43 | 0.33 | 1.00 |
| snRNA      | U1-L45                   | -0.07 | 6.78 | 0.33 | 1.00 |
| piRNA      | piR-36716                | -0.10 | 2.87 | 0.33 | 1.00 |
| mir-5p     | hsa-miR-589-5p           | 0.05  | 4.55 | 0.33 | 1.00 |

|            |                    |       |       |      |      |
|------------|--------------------|-------|-------|------|------|
| snRNA      | U2-L161            | -0.09 | 12.39 | 0.33 | 1.00 |
| scRNA      | HY4-L42            | -0.11 | 1.44  | 0.33 | 1.00 |
| mir-5p     | hsa-let-7e-5p      | 0.05  | 5.52  | 0.34 | 1.00 |
| scRNA      | BC200-L108         | 0.09  | 2.02  | 0.34 | 1.00 |
| scRNA      | BC200-L49          | -0.07 | 4.36  | 0.34 | 1.00 |
| rRNA       | 5S-L367            | -0.08 | 1.90  | 0.34 | 1.00 |
| rRNA       | 5S-L100            | 0.08  | 2.88  | 0.34 | 1.00 |
| mir-5p     | hsa-miR-191-5p     | -0.04 | 8.87  | 0.34 | 1.00 |
| rRNA       | 5S-L489            | 0.28  | 5.18  | 0.34 | 1.00 |
| scRNA      | BC200-L20          | -0.13 | 1.94  | 0.34 | 1.00 |
| snRNA      | U2-L887            | 0.07  | 6.32  | 0.34 | 1.00 |
| scRNA      | HY4-L17            | -0.03 | 10.67 | 0.34 | 1.00 |
| piRNA      | piR-36323-L3       | -0.09 | 2.88  | 0.34 | 1.00 |
| scRNA      | HY1-L414           | 0.10  | 1.30  | 0.34 | 1.00 |
| rRNA       | LSU-rRNA_Hsa-L385  | 0.05  | 8.75  | 0.35 | 1.00 |
| mir-5p     | hsa-miR-150-5p     | -0.07 | 5.10  | 0.35 | 1.00 |
| rRNA       | 5S-L472            | -0.08 | 2.70  | 0.35 | 1.00 |
| mir-5p     | hsa-miR-625-5p     | -0.10 | 2.07  | 0.35 | 1.00 |
| mir-5p     | hsa-miR-196b-5p    | 0.07  | 2.79  | 0.35 | 1.00 |
| scRNA      | HY4-L97            | -0.03 | 8.74  | 0.35 | 1.00 |
| snRNA      | U1-L138            | 0.08  | 3.38  | 0.35 | 1.00 |
| scRNA      | HY1-L121           | -0.08 | 2.72  | 0.35 | 1.00 |
| piRNA      | piR-35982          | -0.06 | 15.63 | 0.35 | 1.00 |
| tRNA       | chr1.tRNA5-GluTTC  | 0.06  | 5.89  | 0.35 | 1.00 |
| rRNA       | LSU-rRNA_Hsa-L383  | 0.03  | 14.16 | 0.35 | 1.00 |
| scRNA      | HY4-L11            | 0.11  | 1.48  | 0.35 | 1.00 |
| piRNA      | piR-53129          | -0.10 | 1.55  | 0.35 | 1.00 |
| rRNA       | LSU-rRNA_Hsa-L53   | -0.08 | 2.22  | 0.35 | 1.00 |
| scRNA      | HY4-L138           | -0.03 | 8.42  | 0.35 | 1.00 |
| scRNA      | HY4-L20            | -0.05 | 3.35  | 0.35 | 1.00 |
| scRNA      | BC200-L165         | 0.11  | 1.54  | 0.35 | 1.00 |
| mir-5p     | hsa-miR-338-5p     | 0.06  | 4.39  | 0.35 | 1.00 |
| scRNA      | HY4-L132           | -0.10 | 2.50  | 0.35 | 1.00 |
| mir-3p     | hsa-let-7f-2-3p    | 0.10  | 1.55  | 0.35 | 1.00 |
| snoRNA     | U100               | -0.11 | 1.54  | 0.35 | 1.00 |
| rRNA       | 5S-L1129           | -0.08 | 1.90  | 0.35 | 1.00 |
| rRNA       | 5S-L515            | -0.07 | 2.06  | 0.35 | 1.00 |
| snoRNA     | U57                | -0.07 | 4.68  | 0.36 | 1.00 |
| scRNA      | BC200-L88          | -0.11 | 1.65  | 0.36 | 1.00 |
| mir-3p     | hsa-miR-450a-3p    | -0.13 | 1.53  | 0.36 | 1.00 |
| mir-5p3pno | hsa-miR-320b       | 0.04  | 4.99  | 0.36 | 1.00 |
| scRNA      | BC200-L16          | -0.15 | 1.59  | 0.36 | 1.00 |
| tRNA       | chr14.tRNA4-ThrTGT | -0.12 | 1.44  | 0.36 | 1.00 |

|        |                             |       |       |      |      |
|--------|-----------------------------|-------|-------|------|------|
| scRNA  | HY4-L87                     | -0.03 | 9.96  | 0.36 | 1.00 |
| scRNA  | HY4-L50                     | 0.09  | 1.52  | 0.36 | 1.00 |
| rRNA   | 5S-L1196                    | -0.14 | 2.22  | 0.36 | 1.00 |
| scRNA  | BC200-L60                   | 0.09  | 2.38  | 0.36 | 1.00 |
| snoRNA | U56                         | 0.10  | 2.63  | 0.36 | 1.00 |
| mir-3p | hsa-miR-486-3p              | -0.04 | 10.93 | 0.36 | 1.00 |
| snoRNA | U42A                        | 0.08  | 4.44  | 0.37 | 1.00 |
| mir-5p | hsa-miR-493-5p              | 0.07  | 4.61  | 0.37 | 1.00 |
| rRNA   | LSU-rRNA_Hsa-L162           | -0.07 | 2.42  | 0.37 | 1.00 |
| tRNA   | chr16.tRNA31-PseudoTGG      | 0.12  | 3.01  | 0.37 | 1.00 |
| snoRNA | U24                         | 0.09  | 2.09  | 0.37 | 1.00 |
| scRNA  | HY3-L159                    | 0.08  | 3.19  | 0.37 | 1.00 |
| snoRNA | U15A                        | -0.13 | 2.08  | 0.37 | 1.00 |
| snoRNA | U42B                        | -0.12 | 4.22  | 0.37 | 1.00 |
| snRNA  | U2-L302                     | -0.06 | 4.05  | 0.37 | 1.00 |
| rRNA   | 5S-L255                     | -0.06 | 2.65  | 0.37 | 1.00 |
| scRNA  | HY1-L114                    | -0.06 | 3.94  | 0.37 | 1.00 |
| snoRNA | U53                         | -0.11 | 2.70  | 0.37 | 1.00 |
| mir-5p | hsa-let-7a-5p-L3            | -0.03 | 12.09 | 0.37 | 1.00 |
| mir-3p | hsa-let-7a-3p-L2            | 0.06  | 3.02  | 0.37 | 1.00 |
| tRF3   | chr16.tRNA31-PseudoTGG-tRF3 | 0.08  | 1.95  | 0.37 | 1.00 |
| rRNA   | LSU-rRNA_Hsa-L13            | -0.03 | 12.04 | 0.37 | 1.00 |
| mir-3p | hsa-miR-197-3p              | 0.07  | 2.69  | 0.37 | 1.00 |
| scRNA  | HY4-L126                    | -0.05 | 3.61  | 0.38 | 1.00 |
| scRNA  | HY4-L57                     | 0.05  | 2.80  | 0.38 | 1.00 |
| rRNA   | 5S-L189                     | -0.09 | 2.24  | 0.38 | 1.00 |
| scRNA  | BC200-L93                   | -0.13 | 1.59  | 0.38 | 1.00 |
| tRNA   | chr15.tRNA4-ArgTCG          | -0.10 | 2.60  | 0.38 | 1.00 |
| scRNA  | HY1-L149                    | 0.05  | 3.78  | 0.38 | 1.00 |
| snoRNA | ACA11                       | -0.10 | 2.12  | 0.38 | 1.00 |
| mir-3p | hsa-miR-101-3p              | -0.04 | 10.61 | 0.38 | 1.00 |
| snoRNA | ACA20                       | -0.10 | 2.30  | 0.38 | 1.00 |
| tRNA   | chr1.tRNA79-GlyTCC          | -0.11 | 1.87  | 0.38 | 1.00 |
| scRNA  | HY4-L10                     | -0.03 | 10.20 | 0.38 | 1.00 |
| mir-5p | hsa-miR-1255b-5p-L2         | -0.09 | 1.62  | 0.38 | 1.00 |
| mir-3p | hsa-miR-574-3p              | -0.10 | 1.66  | 0.38 | 1.00 |
| snoRNA | U87                         | -0.13 | 1.65  | 0.38 | 1.00 |
| piRNA  | piR-31115-L4                | -0.04 | 7.28  | 0.38 | 1.00 |
| snoRNA | U49A                        | -0.05 | 7.52  | 0.39 | 1.00 |
| scRNA  | HY4-L70                     | -0.03 | 9.07  | 0.39 | 1.00 |
| tRNA   | chr5.tRNA22-AspGTC          | -0.13 | 1.97  | 0.39 | 1.00 |
| snoRNA | HBII-142                    | -0.08 | 3.42  | 0.39 | 1.00 |
| snRNA  | U1-L8                       | -0.07 | 6.14  | 0.39 | 1.00 |

|            |                         |       |       |      |      |
|------------|-------------------------|-------|-------|------|------|
| mir-3p     | hsa-miR-28-3p           | -0.03 | 7.13  | 0.39 | 1.00 |
| snoRNA     | U106                    | -0.11 | 1.86  | 0.39 | 1.00 |
| mir-3p     | hsa-miR-654-3p          | 0.08  | 3.75  | 0.39 | 1.00 |
| piRNA      | piR-53659               | 0.07  | 2.18  | 0.39 | 1.00 |
| rRNA       | 5S-L61                  | -0.07 | 2.67  | 0.39 | 1.00 |
| mir-3p     | hsa-let-7i-3p           | -0.09 | 1.50  | 0.39 | 1.00 |
| mir-5p     | hsa-miR-766-5p          | 0.08  | 1.81  | 0.39 | 1.00 |
| rRNA       | LSU-rRNA_Hsa-L341       | 0.08  | 1.93  | 0.39 | 1.00 |
| snoRNA     | U95                     | -0.06 | 6.95  | 0.39 | 1.00 |
| tRNA       | chr6.tRNA83-LeuTAA      | 0.07  | 2.22  | 0.39 | 1.00 |
| rRNA       | SSU-rRNA_Hsa-L80        | -0.05 | 6.73  | 0.39 | 1.00 |
| scRNA      | HY5-L7                  | 0.08  | 2.29  | 0.39 | 1.00 |
| mir-5p     | hsa-miR-382-5p          | 0.06  | 5.88  | 0.40 | 1.00 |
| mir-5p     | hsa-miR-185-5p          | -0.04 | 8.24  | 0.40 | 1.00 |
| scRNA      | HY4-L107                | -0.03 | 9.96  | 0.40 | 1.00 |
| mir-3p     | hsa-miR-500a-3p         | 0.05  | 3.32  | 0.40 | 1.00 |
| mir-5p     | hsa-miR-486-5p          | -0.03 | 13.44 | 0.40 | 1.00 |
| scRNA      | HY3-L272                | 0.08  | 1.38  | 0.40 | 1.00 |
| mir-5p     | hsa-miR-877-5p          | 0.07  | 2.35  | 0.40 | 1.00 |
| rRNA       | 5S-L803                 | -0.03 | 7.74  | 0.40 | 1.00 |
| scRNA      | HY1-L159                | -0.05 | 4.34  | 0.40 | 1.00 |
| snoRNA     | U63                     | -0.06 | 5.92  | 0.40 | 1.00 |
| piRNA      | piR-60577-L3            | -0.04 | 7.08  | 0.40 | 1.00 |
| tRF3       | chr18.tRNA1-GluCTC-tRF3 | 0.11  | 2.27  | 0.40 | 1.00 |
| tRNA       | chr16.tRNA29-ProAGG     | -0.06 | 2.96  | 0.40 | 1.00 |
| tRNA       | chr6.tRNA15-TyrGTA      | -0.05 | 5.52  | 0.41 | 1.00 |
| mir-5p     | hsa-miR-92b-5p          | -0.07 | 2.28  | 0.41 | 1.00 |
| rRNA       | LSU-rRNA_Hsa-L297       | -0.10 | 1.90  | 0.41 | 1.00 |
| rRNA       | 5S-L104                 | -0.03 | 10.61 | 0.41 | 1.00 |
| rRNA       | 5S-L97                  | -0.04 | 10.24 | 0.41 | 1.00 |
| mir-5p3pno | hsa-miR-543             | 0.06  | 5.86  | 0.41 | 1.00 |
| rRNA       | LSU-rRNA_Hsa-L140       | -0.06 | 4.43  | 0.41 | 1.00 |
| mir-3p     | hsa-miR-323b-3p         | 0.07  | 3.62  | 0.41 | 1.00 |
| tRNA       | chr15.tRNA2-LysCTT      | 0.03  | 6.59  | 0.41 | 1.00 |
| mir-3p     | hsa-miR-23b-3p          | 0.05  | 3.55  | 0.41 | 1.00 |
| tRNA       | chr6.tRNA88-PseudoGAA   | 0.04  | 8.20  | 0.41 | 1.00 |
| mir-5p     | hsa-miR-503-5p          | -0.06 | 3.20  | 0.41 | 1.00 |
| snoRNA     | SNORD126                | -0.08 | 2.74  | 0.41 | 1.00 |
| tRNA       | chr6.tRNA138-ArgACG     | 0.09  | 1.66  | 0.41 | 1.00 |
| snRNA      | U1-L174                 | 0.07  | 1.76  | 0.41 | 1.00 |
| piRNA      | piR-31638-L3            | 0.05  | 7.00  | 0.41 | 1.00 |
| snRNA      | U3-L79                  | -0.07 | 3.27  | 0.42 | 1.00 |
| mir-3p     | hsa-miR-671-3p          | -0.05 | 4.05  | 0.42 | 1.00 |

|            |                             |       |       |      |      |
|------------|-----------------------------|-------|-------|------|------|
| rRNA       | 5S-L254                     | 0.06  | 2.29  | 0.42 | 1.00 |
| tRNA       | chr5.tRNA6-ValCAC           | -0.04 | 10.69 | 0.42 | 1.00 |
| tRNA       | chr17.tRNA16-GlnTTG         | -0.06 | 2.36  | 0.42 | 1.00 |
| tRNA       | chr6.tRNA30-ProCGG          | -0.04 | 10.88 | 0.42 | 1.00 |
| tRNA       | chr17.tRNA12-TrpCCA         | 0.07  | 2.18  | 0.42 | 1.00 |
| piRNA      | piR-36741                   | 0.05  | 6.41  | 0.42 | 1.00 |
| piRNA      | piR-33151-L12               | -0.05 | 2.94  | 0.42 | 1.00 |
| rRNA       | LSU-rRNA_Hsa-L360           | -0.07 | 1.84  | 0.42 | 1.00 |
| tRNA       | chr11.tRNA11-LysTTT         | -0.05 | 7.37  | 0.42 | 1.00 |
| mir-5p3pno | hsa-miR-181d                | -0.04 | 3.90  | 0.42 | 1.00 |
| snoRNA     | U60                         | -0.07 | 4.21  | 0.43 | 1.00 |
| mir-5p     | hsa-miR-126-5p              | -0.04 | 6.05  | 0.43 | 1.00 |
| scRNA      | HY4-L120                    | -0.03 | 9.92  | 0.43 | 1.00 |
| piRNA      | piR-33082                   | -0.04 | 7.18  | 0.43 | 1.00 |
| tRNA       | chr1.tRNA52-ProCGG          | -0.07 | 2.13  | 0.43 | 1.00 |
| snoRNA     | mgh18S-121                  | -0.14 | 1.93  | 0.43 | 1.00 |
| rRNA       | 5S-L389                     | -0.10 | 1.35  | 0.43 | 1.00 |
| snoRNA     | ACA51                       | -0.08 | 2.15  | 0.43 | 1.00 |
| scRNA      | HY4-L134                    | -0.07 | 2.51  | 0.43 | 1.00 |
| scRNA      | HY4-L102                    | -0.03 | 8.16  | 0.43 | 1.00 |
| scRNA      | HY4-L15                     | -0.03 | 7.92  | 0.43 | 1.00 |
| rRNA       | LSU-rRNA_Hsa-L42            | -0.08 | 1.88  | 0.43 | 1.00 |
| rRNA       | 5S-L191                     | -0.05 | 4.70  | 0.43 | 1.00 |
| mir-5p     | hsa-let-7a-5p               | -0.10 | 2.02  | 0.43 | 1.00 |
| mir-3p     | hsa-miR-21-3p               | 0.09  | 1.95  | 0.44 | 1.00 |
| tRNA       | chr6.tRNA82-GlyGCC          | -0.05 | 5.27  | 0.44 | 1.00 |
| mir-3p     | hsa-miR-382-3p              | -0.08 | 2.29  | 0.44 | 1.00 |
| rRNA       | LSU-rRNA_Hsa-L19            | 0.07  | 2.10  | 0.44 | 1.00 |
| tRF3       | chr17.tRNA33-PseudoTTG-tRF3 | -0.05 | 4.41  | 0.44 | 1.00 |
| piRNA      | piR-49145                   | 0.06  | 2.41  | 0.44 | 1.00 |
| rRNA       | LSU-rRNA_Hsa-L102           | 0.06  | 3.17  | 0.44 | 1.00 |
| tRNA       | chr19.tRNA13-ValCAC         | 0.05  | 4.33  | 0.44 | 1.00 |
| scRNA      | HY4-L38                     | -0.05 | 4.19  | 0.44 | 1.00 |
| mir-5p     | hsa-miR-144-5p              | -0.05 | 5.62  | 0.44 | 1.00 |
| snoRNA     | U45B                        | -0.09 | 2.57  | 0.44 | 1.00 |
| rRNA       | 5S-L550                     | -0.06 | 2.32  | 0.44 | 1.00 |
| tRNA       | chr7.tRNA21-CysGCA          | -0.10 | 1.68  | 0.44 | 1.00 |
| scRNA      | HY1-L273                    | 0.06  | 1.90  | 0.44 | 1.00 |
| rRNA       | 5S-L1234                    | 0.04  | 5.10  | 0.45 | 1.00 |
| rRNA       | 5S-L344                     | -0.06 | 2.37  | 0.45 | 1.00 |
| mir-5p     | hsa-miR-654-5p              | 0.07  | 3.09  | 0.45 | 1.00 |
| mir-5p3pno | hsa-miR-1287                | -0.09 | 1.87  | 0.45 | 1.00 |
| rRNA       | 5S-L113                     | -0.03 | 10.34 | 0.45 | 1.00 |



|            |                           |       |       |      |      |
|------------|---------------------------|-------|-------|------|------|
| piRNA      | piR-38354                 | -0.07 | 2.15  | 0.45 | 1.00 |
| rRNA       | LSU-rRNA_Hsa-L247         | -0.08 | 1.53  | 0.45 | 1.00 |
| mir-3p     | hsa-miR-4433-3p           | -0.06 | 2.78  | 0.45 | 1.00 |
| tRNA       | chr13.tRNA2-PseudoCTC     | 0.03  | 4.77  | 0.45 | 1.00 |
| scRNA      | HY4-L66                   | -0.03 | 7.15  | 0.45 | 1.00 |
| mir-5p3pno | hsa-miR-548e              | 0.06  | 2.60  | 0.45 | 1.00 |
| tRNA       | chr7.tRNA7-CysGCA         | -0.05 | 7.06  | 0.45 | 1.00 |
| rRNA       | 5S-L1144                  | -0.08 | 1.38  | 0.45 | 1.00 |
| scRNA      | BC200-L90                 | -0.07 | 2.60  | 0.45 | 1.00 |
| mir-5p3pno | hsa-miR-1278              | 0.10  | 1.56  | 0.45 | 1.00 |
| tRF5       | chr3.tRNA9-PseudoTTG-tRF5 | 0.08  | 1.99  | 0.45 | 1.00 |
| snRNA      | U2-L240                   | 0.07  | 3.38  | 0.46 | 1.00 |
| snRNA      | U1-L29                    | 0.07  | 2.02  | 0.46 | 1.00 |
| tRNA       | chr14.tRNA7-ArgACG        | -0.09 | 1.75  | 0.46 | 1.00 |
| tRNA       | chr17.tRNA36-ThrAGT       | 0.07  | 2.02  | 0.46 | 1.00 |
| scRNA      | HY1-L167                  | -0.07 | 2.48  | 0.46 | 1.00 |
| piRNA      | piR-52416-L2              | -0.08 | 2.28  | 0.46 | 1.00 |
| snoRNA     | U22                       | 0.07  | 3.81  | 0.46 | 1.00 |
| mir-5p     | hsa-miR-30e-5p            | 0.03  | 8.13  | 0.46 | 1.00 |
| snRNA      | U2-L128                   | -0.05 | 7.39  | 0.46 | 1.00 |
| mir-3p     | hsa-miR-30a-3p            | -0.03 | 5.31  | 0.46 | 1.00 |
| scRNA      | HY1-L137                  | 0.04  | 4.45  | 0.46 | 1.00 |
| snRNA      | U2-L386                   | 0.09  | 2.89  | 0.46 | 1.00 |
| tRNA       | chr6.tRNA168-TrpCCA       | 0.07  | 2.05  | 0.46 | 1.00 |
| tRNA       | chr14.tRNA10-IleAAT       | 0.08  | 1.41  | 0.46 | 1.00 |
| scRNA      | HY4-L53                   | -0.03 | 3.75  | 0.46 | 1.00 |
| rRNA       | 5S-L578                   | 0.07  | 2.37  | 0.47 | 1.00 |
| snRNA      | U6-L1308                  | -0.07 | 2.67  | 0.47 | 1.00 |
| rRNA       | 5S-L746                   | 0.07  | 2.21  | 0.47 | 1.00 |
| tRF5       | chr17.tRNA21-ArgCCT-tRF5  | -0.09 | 1.46  | 0.47 | 1.00 |
| piRNA      | piR-32678                 | 0.03  | 6.09  | 0.47 | 1.00 |
| scRNA      | HY4-L54                   | -0.03 | 6.72  | 0.47 | 1.00 |
| tRNA       | chr9.tRNA4-ArgTCT         | -0.10 | 1.63  | 0.47 | 1.00 |
| mir-5p3pno | hsa-let-7c-L2             | -0.03 | 5.48  | 0.47 | 1.00 |
| piRNA      | piR-61647-L4              | -0.05 | 3.62  | 0.47 | 1.00 |
| mir-5p     | hsa-miR-10b-5p            | 0.03  | 10.26 | 0.47 | 1.00 |
| tRNA       | chr6.tRNA175-SerGCT       | 0.11  | 2.06  | 0.47 | 1.00 |
| mir-5p     | hsa-miR-96-5p             | 0.07  | 2.19  | 0.47 | 1.00 |
| snoRNA     | U99                       | -0.08 | 3.13  | 0.47 | 1.00 |
| mir-3p     | hsa-miR-582-3p            | 0.05  | 4.81  | 0.48 | 1.00 |
| tRNA       | chr6.tRNA143-LysTTT       | -0.04 | 5.55  | 0.48 | 1.00 |
| scRNA      | HY4-L153                  | -0.02 | 8.62  | 0.48 | 1.00 |
| mir-5p     | hsa-miR-15a-5p            | -0.04 | 3.78  | 0.48 | 1.00 |

|            |                          |       |       |      |      |
|------------|--------------------------|-------|-------|------|------|
| rRNA       | LSU-rRNA_Hsa-L163        | -0.05 | 9.10  | 0.48 | 1.00 |
| scRNA      | BC200-L148               | 0.08  | 2.11  | 0.48 | 1.00 |
| snoRNA     | HBII-82B                 | 0.09  | 2.38  | 0.48 | 1.00 |
| mir-5p3pno | hsa-miR-1-L2             | -0.05 | 4.82  | 0.48 | 1.00 |
| mir-3p     | hsa-miR-542-3p           | 0.06  | 3.59  | 0.48 | 1.00 |
| scRNA      | BC200-L28                | -0.08 | 2.06  | 0.48 | 1.00 |
| scRNA      | HY1-L143                 | 0.06  | 2.32  | 0.48 | 1.00 |
| snRNA      | U5-L3                    | 0.06  | 2.02  | 0.49 | 1.00 |
| tRNA       | chr1.tRNA128-LysCTT      | -0.05 | 3.24  | 0.49 | 1.00 |
| snoRNA     | U82                      | -0.06 | 5.05  | 0.49 | 1.00 |
| mir-5p     | hsa-miR-224-5p           | -0.04 | 6.88  | 0.49 | 1.00 |
| snRNA      | U5-L67                   | -0.04 | 7.02  | 0.49 | 1.00 |
| mir-5p     | hsa-miR-200c-5p          | 0.09  | 2.02  | 0.49 | 1.00 |
| tRNA       | chr1.tRNA64-GluTTC       | -0.03 | 7.89  | 0.49 | 1.00 |
| mir-3p     | hsa-miR-374b-3p          | -0.07 | 2.49  | 0.49 | 1.00 |
| tRNA       | chr2.tRNA14-TyrATA       | -0.05 | 3.30  | 0.49 | 1.00 |
| snoRNA     | U102                     | -0.04 | 7.38  | 0.49 | 1.00 |
| rRNA       | 5S-L957                  | -0.08 | 1.43  | 0.49 | 1.00 |
| mir-5p     | hsa-miR-140-5p           | 0.04  | 4.19  | 0.49 | 1.00 |
| mir-3p     | hsa-miR-126-3p           | -0.02 | 11.12 | 0.50 | 1.00 |
| piRNA      | piR-33151-L4             | -0.04 | 4.06  | 0.50 | 1.00 |
| snoRNA     | ACA16                    | -0.07 | 2.80  | 0.50 | 1.00 |
| mir-5p     | hsa-miR-193a-5p          | 0.04  | 5.17  | 0.50 | 1.00 |
| snoRNA     | HBII-316                 | -0.10 | 2.02  | 0.50 | 1.00 |
| piRNA      | piR-36743                | -0.05 | 3.67  | 0.50 | 1.00 |
| scRNA      | BC200-L156               | 0.05  | 2.60  | 0.50 | 1.00 |
| mir-5p     | hsa-miR-769-5p           | -0.05 | 3.02  | 0.50 | 1.00 |
| rRNA       | LSU-rRNA_Hsa-L333        | -0.04 | 4.08  | 0.50 | 1.00 |
| tRNA       | chr2.tRNA22-PseudoTTG    | -0.06 | 3.03  | 0.50 | 1.00 |
| snoRNA     | HBII-202                 | -0.06 | 6.44  | 0.50 | 1.00 |
| tRNA       | chr6.tRNA86-PseudoTAC    | -0.07 | 2.07  | 0.50 | 1.00 |
| mir-5p     | hsa-miR-151a-5p          | -0.03 | 6.40  | 0.50 | 1.00 |
| tRF5       | chr16.tRNA8-ProTGG-tRF5  | -0.07 | 2.11  | 0.51 | 1.00 |
| snoRNA     | U83B                     | -0.06 | 2.68  | 0.51 | 1.00 |
| mir-5p     | hsa-miR-148b-5p          | -0.05 | 2.86  | 0.51 | 1.00 |
| scRNA      | HY3-L497                 | -0.06 | 2.14  | 0.51 | 1.00 |
| snoRNA     | HBII-85-3                | -0.09 | 2.57  | 0.51 | 1.00 |
| tRNA       | chr2.tRNA6-GluTTC        | -0.03 | 4.09  | 0.51 | 1.00 |
| mir-5p     | hsa-miR-1292-5p          | -0.07 | 1.70  | 0.51 | 1.00 |
| tRF5       | chr6.tRNA130-GlnTTG-tRF5 | -0.06 | 1.89  | 0.51 | 1.00 |
| mir-3p     | hsa-miR-411-3p           | 0.08  | 1.75  | 0.51 | 1.00 |
| tRNA       | chr6.tRNA100-LeuCAA      | -0.04 | 3.49  | 0.51 | 1.00 |
| piRNA      | piR-45195-L2             | 0.08  | 1.33  | 0.51 | 1.00 |

|            |                         |       |       |      |      |
|------------|-------------------------|-------|-------|------|------|
| mir-5p3pno | hsa-miR-320d-L2         | 0.04  | 3.63  | 0.51 | 1.00 |
| scRNA      | HY4-L35                 | -0.03 | 7.15  | 0.51 | 1.00 |
| tRNA       | chr12.tRNA11-PheGAA     | 0.09  | 1.77  | 0.51 | 1.00 |
| snRNA      | U2-L1001                | -0.07 | 2.25  | 0.51 | 1.00 |
| snoRNA     | U31                     | -0.04 | 7.96  | 0.51 | 1.00 |
| tRNA       | chr6.tRNA85-PseudoTTC   | 0.04  | 4.59  | 0.52 | 1.00 |
| rRNA       | 5S-L317                 | 0.08  | 1.26  | 0.52 | 1.00 |
| rRNA       | 5S-L106                 | -0.03 | 12.29 | 0.52 | 1.00 |
| mir-3p     | hsa-miR-570-3p          | -0.05 | 1.85  | 0.52 | 1.00 |
| piRNA      | piR-36494               | 0.09  | 2.00  | 0.52 | 1.00 |
| snoRNA     | U3-4                    | 0.04  | 7.31  | 0.52 | 1.00 |
| mir-3p     | hsa-miR-4677-3p         | 0.06  | 1.78  | 0.52 | 1.00 |
| mir-5p     | hsa-miR-1228-5p         | 0.07  | 2.00  | 0.52 | 1.00 |
| snRNA      | U13_-L44                | -0.09 | 1.56  | 0.52 | 1.00 |
| mir-5p     | hsa-miR-146b-5p         | -0.03 | 7.71  | 0.52 | 1.00 |
| mir-3p     | hsa-miR-181a-2-3p       | 0.03  | 4.18  | 0.52 | 1.00 |
| tRNA       | chr17.tRNA18-ArgCCT     | 0.06  | 1.72  | 0.52 | 1.00 |
| mir-5p     | hsa-miR-1307-5p         | -0.08 | 1.42  | 0.52 | 1.00 |
| mir-3p     | hsa-miR-548g-3p         | -0.06 | 2.14  | 0.52 | 1.00 |
| snoRNA     | ACA58                   | -0.08 | 1.85  | 0.52 | 1.00 |
| snoRNA     | U83A                    | -0.06 | 3.52  | 0.52 | 1.00 |
| scRNA      | BC200-L140              | 0.02  | 7.01  | 0.52 | 1.00 |
| rRNA       | LSU-rRNA_Hsa-L2         | 0.04  | 9.24  | 0.52 | 1.00 |
| piRNA      | piR-31068-L3            | -0.05 | 3.12  | 0.52 | 1.00 |
| scRNA      | HY4-L68                 | 0.03  | 4.03  | 0.53 | 1.00 |
| snoRNA     | U101                    | -0.05 | 5.22  | 0.53 | 1.00 |
| mir-5p3pno | hsa-miR-3672            | 0.07  | 1.53  | 0.53 | 1.00 |
| mir-5p     | hsa-miR-450a-5p         | 0.05  | 3.31  | 0.53 | 1.00 |
| tRF3       | chr22.tRNA1-SeCTCA-tRF3 | -0.06 | 4.56  | 0.53 | 1.00 |
| mir-5p     | hsa-miR-4665-5p         | -0.08 | 1.60  | 0.53 | 1.00 |
| scRNA      | HY4-L61                 | -0.03 | 5.54  | 0.53 | 1.00 |
| tRNA       | chr2.tRNA2-TyrGTA       | -0.07 | 1.69  | 0.53 | 1.00 |
| rRNA       | LSU-rRNA_Hsa-L278       | 0.04  | 2.72  | 0.53 | 1.00 |
| piRNA      | piR-51810-L2            | 0.03  | 8.21  | 0.53 | 1.00 |
| snRNA      | U2-L479                 | -0.09 | 1.54  | 0.53 | 1.00 |
| scRNA      | BC200-L37               | -0.03 | 6.33  | 0.53 | 1.00 |
| rRNA       | 5S-L98                  | -0.03 | 9.83  | 0.53 | 1.00 |
| snoRNA     | U18A                    | -0.05 | 6.81  | 0.53 | 1.00 |
| rRNA       | LSU-rRNA_Hsa-L221       | 0.05  | 2.74  | 0.54 | 1.00 |
| mir-3p     | hsa-miR-103a-3p-L2      | 0.03  | 3.33  | 0.54 | 1.00 |
| snRNA      | U5-L22                  | 0.07  | 1.98  | 0.54 | 1.00 |
| scRNA      | HY4-L69                 | -0.02 | 9.89  | 0.54 | 1.00 |
| rRNA       | LSU-rRNA_Hsa-L161       | -0.07 | 1.84  | 0.54 | 1.00 |

|            |                            |       |       |      |      |
|------------|----------------------------|-------|-------|------|------|
| tRF3       | chr14.tRNA14-GluTTC-tRF3   | -0.11 | 2.02  | 0.54 | 1.00 |
| tRNA       | chr16.tRNA33-PseudoAGG     | 0.05  | 3.64  | 0.54 | 1.00 |
| mir-3p     | hsa-miR-150-3p             | 0.05  | 2.88  | 0.54 | 1.00 |
| tRNA       | chr11.tRNA8-SerGCT         | 0.04  | 4.09  | 0.54 | 1.00 |
| rRNA       | LSU-rRNA_Hsa-L41           | -0.09 | 1.50  | 0.54 | 1.00 |
| rRNA       | SSU-rRNA_Hsa-L30           | -0.02 | 11.12 | 0.54 | 1.00 |
| mir-3p     | hsa-miR-361-3p             | -0.02 | 7.04  | 0.54 | 1.00 |
| mir-3p     | hsa-miR-2115-3p            | -0.07 | 1.61  | 0.54 | 1.00 |
| snoRNA     | U105                       | -0.07 | 2.34  | 0.54 | 1.00 |
| tRF3       | chr10.tRNA5-PseudoCTG-tRF3 | -0.06 | 1.70  | 0.54 | 1.00 |
| mir-5p     | hsa-miR-27a-5p             | -0.03 | 4.98  | 0.54 | 1.00 |
| rRNA       | 5S-L627                    | -0.07 | 1.59  | 0.54 | 1.00 |
| scRNA      | HY4                        | -0.02 | 10.16 | 0.55 | 1.00 |
| mir-5p3pno | hsa-miR-5096               | -0.09 | 2.21  | 0.55 | 1.00 |
| snoRNA     | U94                        | -0.06 | 3.12  | 0.55 | 1.00 |
| piRNA      | piR-58356                  | -0.03 | 5.40  | 0.55 | 1.00 |
| snoRNA     | U27                        | -0.06 | 4.90  | 0.55 | 1.00 |
| mir-5p     | hsa-miR-30c-5p             | -0.02 | 6.46  | 0.55 | 1.00 |
| scRNA      | HY4-L96                    | -0.03 | 3.68  | 0.55 | 1.00 |
| rRNA       | LSU-rRNA_Hsa-L308          | -0.07 | 1.76  | 0.55 | 1.00 |
| snoRNA     | ACA18                      | -0.07 | 2.07  | 0.55 | 1.00 |
| scRNA      | HY1-L280                   | -0.05 | 2.44  | 0.55 | 1.00 |
| scRNA      | HY3-L359                   | 0.07  | 1.91  | 0.55 | 1.00 |
| scRNA      | HY1-L178                   | -0.04 | 4.26  | 0.55 | 1.00 |
| snoRNA     | HBI-43                     | -0.06 | 3.60  | 0.55 | 1.00 |
| scRNA      | HY4-L32                    | -0.03 | 3.65  | 0.55 | 1.00 |
| scRNA      | HY1-L124                   | -0.06 | 1.84  | 0.55 | 1.00 |
| rRNA       | LSU-rRNA_Hsa-L266          | -0.06 | 3.17  | 0.55 | 1.00 |
| snoRNA     | U61                        | -0.04 | 5.55  | 0.55 | 1.00 |
| rRNA       | 5S-L194                    | -0.04 | 2.89  | 0.55 | 1.00 |
| rRNA       | 5S-L935                    | 0.05  | 2.94  | 0.55 | 1.00 |
| snoRNA     | HBII-135                   | -0.05 | 5.06  | 0.55 | 1.00 |
| scRNA      | HY3-L45                    | -0.04 | 3.48  | 0.55 | 1.00 |
| rRNA       | 5S-L1009                   | -0.06 | 2.50  | 0.55 | 1.00 |
| rRNA       | LSU-rRNA_Hsa-L388          | 0.02  | 10.79 | 0.55 | 1.00 |
| mir-5p     | hsa-miR-7-5p-L3            | -0.06 | 1.44  | 0.55 | 1.00 |
| mir-5p3pno | hsa-miR-375                | 0.03  | 6.00  | 0.55 | 1.00 |
| mir-5p     | hsa-miR-130b-5p            | -0.05 | 4.40  | 0.55 | 1.00 |
| snRNA      | U2-L765                    | -0.07 | 2.07  | 0.55 | 1.00 |
| rRNA       | 5S-L253                    | -0.04 | 3.20  | 0.56 | 1.00 |
| scRNA      | HY4-L39                    | -0.03 | 3.89  | 0.56 | 1.00 |
| scRNA      | BC200-L13                  | 0.06  | 2.84  | 0.56 | 1.00 |
| snoRNA     | HBII-180A                  | -0.08 | 2.03  | 0.56 | 1.00 |

|            |                         |       |       |      |      |
|------------|-------------------------|-------|-------|------|------|
| mir-5p     | hsa-miR-132-5p          | -0.06 | 2.50  | 0.56 | 1.00 |
| piRNA      | piR-41209-L2            | -0.04 | 3.72  | 0.56 | 1.00 |
| scRNA      | BC200-L27               | -0.05 | 2.97  | 0.56 | 1.00 |
| snRNA      | U6-L440                 | -0.08 | 1.97  | 0.56 | 1.00 |
| tRF5       | chr1.tRNA90-ValCAC-tRF5 | -0.06 | 2.14  | 0.56 | 1.00 |
| mir-5p3pno | hsa-miR-320a            | 0.02  | 11.48 | 0.56 | 1.00 |
| rRNA       | 5S-L583                 | -0.08 | 2.68  | 0.56 | 1.00 |
| piRNA      | piR-44716               | -0.17 | 4.73  | 0.56 | 1.00 |
| rRNA       | 5S-L108                 | -0.02 | 11.53 | 0.56 | 1.00 |
| scRNA      | HY4-L147                | -0.02 | 9.21  | 0.56 | 1.00 |
| mir-5p     | hsa-miR-21-5p           | -0.02 | 13.59 | 0.56 | 1.00 |
| rRNA       | 5S-L782                 | -0.03 | 3.63  | 0.56 | 1.00 |
| scRNA      | HY4-L111                | -0.02 | 9.50  | 0.56 | 1.00 |
| mir-5p     | hsa-miR-550a-5p-L2      | -0.03 | 3.39  | 0.56 | 1.00 |
| scRNA      | HY5-L21                 | 0.03  | 11.03 | 0.56 | 1.00 |
| rRNA       | LSU-rRNA_Hsa-L236       | -0.08 | 1.42  | 0.57 | 1.00 |
| mir-5p     | hsa-miR-4433-5p         | 0.04  | 5.15  | 0.57 | 1.00 |
| rRNA       | LSU-rRNA_Hsa-L48        | 0.06  | 1.64  | 0.57 | 1.00 |
| tRNA       | chr6.tRNA14-TyrGTA      | -0.07 | 1.90  | 0.57 | 1.00 |
| mir-5p     | hsa-miR-1234-5p         | -0.03 | 14.77 | 0.57 | 1.00 |
| scRNA      | BC200-L31               | 0.07  | 1.42  | 0.57 | 1.00 |
| piRNA      | piR-51119               | -0.09 | 2.10  | 0.57 | 1.00 |
| tRNA       | chr6.tRNA78-LeuAAG      | -0.07 | 2.00  | 0.57 | 1.00 |
| scRNA      | HY5-L11                 | 0.04  | 5.18  | 0.57 | 1.00 |
| snoRNA     | U18B                    | 0.06  | 2.75  | 0.57 | 1.00 |
| tRNA       | chr16.tRNA10-LysCTT     | 0.03  | 4.96  | 0.57 | 1.00 |
| scRNA      | BC200-L120              | 0.05  | 1.92  | 0.58 | 1.00 |
| mir-5p     | hsa-miR-629-5p          | -0.02 | 7.76  | 0.58 | 1.00 |
| mir-5p3pno | hsa-miR-328             | -0.04 | 4.07  | 0.58 | 1.00 |
| scRNA      | BC200-L164              | -0.05 | 2.30  | 0.58 | 1.00 |
| scRNA      | HY4-L114                | -0.05 | 2.44  | 0.58 | 1.00 |
| piRNA      | piR-44984-L6            | 0.05  | 2.42  | 0.58 | 1.00 |
| rRNA       | 5S-L558                 | -0.02 | 7.28  | 0.58 | 1.00 |
| snoRNA     | ACA44                   | -0.07 | 2.30  | 0.58 | 1.00 |
| tRNA       | chr6.tRNA75-MetCAT      | 0.08  | 1.36  | 0.58 | 1.00 |
| tRNA       | chr6.tRNA157-ValCAC     | 0.06  | 1.40  | 0.58 | 1.00 |
| scRNA      | HY4-L14                 | -0.02 | 8.83  | 0.58 | 1.00 |
| mir-5p     | hsa-miR-25-5p           | 0.05  | 2.07  | 0.58 | 1.00 |
| mir-5p3pno | hsa-miR-410             | 0.08  | 1.74  | 0.58 | 1.00 |
| scRNA      | HY4-L122                | -0.02 | 7.82  | 0.59 | 1.00 |
| scRNA      | HY3-L525                | -0.06 | 1.38  | 0.59 | 1.00 |
| snRNA      | U2-L218                 | -0.08 | 1.62  | 0.59 | 1.00 |
| piRNA      | piR-44984-L3            | 0.04  | 2.62  | 0.59 | 1.00 |

|            |                             |       |       |      |      |
|------------|-----------------------------|-------|-------|------|------|
| scRNA      | HY1-L174                    | -0.06 | 1.36  | 0.59 | 1.00 |
| snoRNA     | U55                         | -0.04 | 5.84  | 0.59 | 1.00 |
| snoRNA     | U105B                       | -0.05 | 4.75  | 0.59 | 1.00 |
| scRNA      | HY3-L512                    | 0.07  | 2.05  | 0.59 | 1.00 |
| snRNA      | U5-L2                       | -0.02 | 6.33  | 0.59 | 1.00 |
| rRNA       | 5S-L1091                    | -0.06 | 1.37  | 0.59 | 1.00 |
| snoRNA     | U8-L17                      | -0.05 | 2.67  | 0.59 | 1.00 |
| mir-5p3pno | hsa-miR-378g                | 0.04  | 2.04  | 0.59 | 1.00 |
| rRNA       | 5S-L819                     | -0.05 | 2.01  | 0.59 | 1.00 |
| piRNA      | piR-34041                   | -0.06 | 4.17  | 0.59 | 1.00 |
| rRNA       | LSU-rRNA_Hsa-L132           | 0.02  | 10.51 | 0.59 | 1.00 |
| snRNA      | U2-L405                     | 0.06  | 3.55  | 0.59 | 1.00 |
| mir-3p     | hsa-let-7b-3p               | 0.02  | 3.86  | 0.59 | 1.00 |
| tRF5       | chr1.tRNA109-PseudoGTT-tRF5 | -0.07 | 1.70  | 0.60 | 1.00 |
| scRNA      | HY1-L69                     | -0.03 | 4.11  | 0.60 | 1.00 |
| snoRNA     | HBII-239                    | -0.03 | 4.70  | 0.60 | 1.00 |
| rRNA       | SSU-rRNA_Hsa-L26            | -0.04 | 3.24  | 0.60 | 1.00 |
| mir-5p3pno | hsa-miR-320e                | -0.04 | 1.85  | 0.60 | 1.00 |
| scRNA      | HY1-L191                    | 0.03  | 3.51  | 0.60 | 1.00 |
| mir-5p3pno | hsa-miR-451b                | -0.04 | 2.85  | 0.60 | 1.00 |
| tRNA       | chr16.tRNA32-LysCTT         | -0.06 | 2.11  | 0.60 | 1.00 |
| rRNA       | SSU-rRNA_Hsa-L24            | 0.02  | 9.30  | 0.60 | 1.00 |
| snoRNA     | HBII-55                     | -0.06 | 4.50  | 0.60 | 1.00 |
| scRNA      | HY1-L261                    | -0.06 | 1.76  | 0.60 | 1.00 |
| scRNA      | HY1-L304                    | -0.03 | 3.88  | 0.60 | 1.00 |
| tRNA       | chr11.tRNA12-ProTGG         | -0.03 | 8.16  | 0.60 | 1.00 |
| tRF3       | chr6.tRNA153-IleAAT-tRF3    | -0.05 | 2.68  | 0.60 | 1.00 |
| scRNA      | HY4-L16                     | -0.03 | 3.92  | 0.60 | 1.00 |
| rRNA       | LSU-rRNA_Hsa-L275           | 0.03  | 5.54  | 0.60 | 1.00 |
| mir-5p     | hsa-miR-369-5p              | 0.09  | 1.73  | 0.61 | 1.00 |
| rRNA       | 5S-L500                     | -0.06 | 1.78  | 0.61 | 1.00 |
| rRNA       | 5S-L102                     | -0.02 | 7.36  | 0.61 | 1.00 |
| snRNA      | U2-L550                     | 0.07  | 2.12  | 0.61 | 1.00 |
| mir-3p     | hsa-miR-199b-3p             | 0.02  | 7.58  | 0.61 | 1.00 |
| rRNA       | 5S-L986                     | 0.05  | 1.69  | 0.61 | 1.00 |
| mir-5p3pno | hsa-miR-103b                | -0.02 | 8.26  | 0.61 | 1.00 |
| snoRNA     | HBII-85-15                  | -0.08 | 1.65  | 0.61 | 1.00 |
| rRNA       | 5S-L758                     | 0.04  | 2.59  | 0.61 | 1.00 |
| rRNA       | LSU-rRNA_Hsa-L220           | 0.03  | 4.41  | 0.61 | 1.00 |
| scRNA      | BC200-L95                   | -0.05 | 3.20  | 0.61 | 1.00 |
| mir-5p     | hsa-miR-20b-5p              | -0.04 | 3.49  | 0.61 | 1.00 |
| scRNA      | HY1-L25                     | -0.05 | 1.88  | 0.61 | 1.00 |
| scRNA      | HY1-L106                    | -0.05 | 1.92  | 0.61 | 1.00 |

|            |                        |       |       |      |      |
|------------|------------------------|-------|-------|------|------|
| rRNA       | 5S-L930                | 0.05  | 1.74  | 0.61 | 1.00 |
| piRNA      | piR-39361              | -0.05 | 2.73  | 0.61 | 1.00 |
| tRNA       | chr12.tRNA10-AspGTC    | -0.04 | 4.59  | 0.62 | 1.00 |
| rRNA       | 5S-L95                 | 0.05  | 1.71  | 0.62 | 1.00 |
| snoRNA     | U79                    | -0.07 | 1.72  | 0.62 | 1.00 |
| scRNA      | HY4-L3                 | -0.03 | 2.42  | 0.62 | 1.00 |
| rRNA       | 5S-L997                | -0.06 | 1.97  | 0.62 | 1.00 |
| scRNA      | HY4-L44                | 0.04  | 1.59  | 0.62 | 1.00 |
| tRNA       | chr2.tRNA13-AlaCGC     | 0.03  | 6.52  | 0.62 | 1.00 |
| snRNA      | U2-L75                 | 0.06  | 4.87  | 0.62 | 1.00 |
| mir-5p     | hsa-miR-192-5p         | -0.02 | 8.24  | 0.62 | 1.00 |
| tRNA       | chr6.tRNA28-IleAAT     | 0.04  | 3.35  | 0.62 | 1.00 |
| mir-5p3pno | hsa-miR-1290           | 0.09  | 2.05  | 0.63 | 1.00 |
| scRNA      | HY1-L295               | 0.03  | 4.37  | 0.63 | 1.00 |
| mir-5p     | hsa-miR-194-5p         | 0.02  | 4.46  | 0.63 | 1.00 |
| rRNA       | LSU-rRNA_Hsa-L375      | 0.03  | 10.09 | 0.63 | 1.00 |
| snoRNA     | ACA36B                 | 0.03  | 3.83  | 0.63 | 1.00 |
| mir-3p     | hsa-miR-1307-3p        | -0.02 | 7.96  | 0.63 | 1.00 |
| piRNA      | piR-43772-L2           | -0.02 | 6.19  | 0.63 | 1.00 |
| rRNA       | LSU-rRNA_Hsa-L124      | 0.04  | 2.33  | 0.63 | 1.00 |
| mir-5p3pno | hsa-miR-3928           | 0.05  | 1.51  | 0.63 | 1.00 |
| rRNA       | LSU-rRNA_Hsa-L230      | 0.03  | 3.37  | 0.63 | 1.00 |
| piRNA      | piR-31638              | 0.05  | 1.74  | 0.63 | 1.00 |
| scRNA      | HY1-L263               | 0.03  | 2.72  | 0.63 | 1.00 |
| scRNA      | BC200-L4               | -0.04 | 3.40  | 0.63 | 1.00 |
| mir-5p     | hsa-miR-30a-5p         | 0.02  | 7.14  | 0.63 | 1.00 |
| scRNA      | HY3-L196               | -0.04 | 1.85  | 0.64 | 1.00 |
| tRNA       | chr1.tRNA110-PseudoTTC | -0.06 | 1.44  | 0.64 | 1.00 |
| snRNA      | U7-L207                | 0.08  | 2.19  | 0.64 | 1.00 |
| mir-3p     | hsa-miR-30d-3p         | 0.04  | 1.67  | 0.64 | 1.00 |
| mir-3p     | hsa-miR-363-3p         | -0.02 | 7.85  | 0.64 | 1.00 |
| snoRNA     | ACA7                   | 0.06  | 2.30  | 0.64 | 1.00 |
| scRNA      | HY3-L518               | -0.02 | 8.30  | 0.64 | 1.00 |
| piRNA      | piR-33382-L2           | -0.07 | 2.24  | 0.64 | 1.00 |
| scRNA      | BC200-L62              | 0.03  | 2.72  | 0.64 | 1.00 |
| tRNA       | chr6.tRNA122-PseudoTGC | 0.04  | 2.61  | 0.64 | 1.00 |
| rRNA       | 5S-L1178               | -0.04 | 1.51  | 0.64 | 1.00 |
| mir-5p3pno | hsa-miR-548j           | 0.05  | 1.80  | 0.64 | 1.00 |
| tRNA       | chr14.tRNA2-LeuTAG     | 0.05  | 2.26  | 0.64 | 1.00 |
| mir-3p     | hsa-miR-200c-3p        | 0.04  | 2.75  | 0.65 | 1.00 |
| scRNA      | HY4-L59                | -0.02 | 4.56  | 0.65 | 1.00 |
| rRNA       | SSU-rRNA_Hsa-L34       | -0.02 | 5.52  | 0.65 | 1.00 |
| mir-5p     | hsa-let-7b-5p          | 0.01  | 12.45 | 0.65 | 1.00 |

|            |                         |       |       |      |      |
|------------|-------------------------|-------|-------|------|------|
| tRF3       | chr12.tRNA7-AspGTC-trf3 | -0.08 | 1.65  | 0.65 | 1.00 |
| piRNA      | piR-60576-L6            | -0.02 | 8.04  | 0.65 | 1.00 |
| piRNA      | piR-31038               | 0.02  | 9.22  | 0.65 | 1.00 |
| scRNA      | HY3-L142                | -0.07 | 1.70  | 0.65 | 1.00 |
| mir-3p     | hsa-miR-223-3p          | -0.03 | 7.30  | 0.65 | 1.00 |
| tRNA       | chr6.tRNA37-ValAAC      | 0.03  | 9.05  | 0.65 | 1.00 |
| rRNA       | LSU-rRNA_Hsa-L159       | -0.03 | 2.56  | 0.65 | 1.00 |
| scRNA      | HY4-L93                 | 0.02  | 3.97  | 0.65 | 1.00 |
| scRNA      | HY3-L524                | 0.05  | 1.56  | 0.65 | 1.00 |
| mir-3p     | hsa-miR-148b-3p         | -0.02 | 8.62  | 0.65 | 1.00 |
| snRNA      | U1-L39                  | 0.05  | 1.74  | 0.65 | 1.00 |
| snoRNA     | ACA46                   | 0.05  | 2.20  | 0.65 | 1.00 |
| tRF3       | chr3.tRNA6-CysGCA-trf3  | -0.05 | 2.19  | 0.65 | 1.00 |
| scRNA      | HY4-L130                | -0.02 | 14.43 | 0.65 | 1.00 |
| mir-5p     | hsa-miR-335-5p          | 0.02  | 3.57  | 0.66 | 1.00 |
| scRNA      | HY1-L260                | 0.02  | 4.88  | 0.66 | 1.00 |
| mir-3p     | hsa-miR-143-3p          | 0.02  | 9.70  | 0.66 | 1.00 |
| scRNA      | HY1-L287                | 0.02  | 6.16  | 0.66 | 1.00 |
| rRNA       | LSU-rRNA_Hsa-L251       | 0.02  | 7.46  | 0.66 | 1.00 |
| rRNA       | LSU-rRNA_Hsa-L93        | -0.02 | 7.67  | 0.66 | 1.00 |
| scRNA      | HY4-L71                 | -0.02 | 5.97  | 0.66 | 1.00 |
| mir-5p     | hsa-miR-93-5p           | -0.02 | 7.11  | 0.66 | 1.00 |
| rRNA       | 5S-L612                 | -0.04 | 2.86  | 0.66 | 1.00 |
| piRNA      | piR-33468-L4            | -0.03 | 2.34  | 0.66 | 1.00 |
| mir-5p     | hsa-miR-331-5p          | -0.06 | 1.28  | 0.66 | 1.00 |
| mir-5p3pno | hsa-miR-6073            | 0.05  | 1.46  | 0.66 | 1.00 |
| mir-5p3pno | hsa-miR-494             | 0.05  | 1.75  | 0.66 | 1.00 |
| scRNA      | HY4-L83                 | -0.03 | 4.19  | 0.66 | 1.00 |
| snoRNA     | HBII-251                | 0.05  | 3.81  | 0.66 | 1.00 |
| scRNA      | HY1-L356                | 0.02  | 4.04  | 0.66 | 1.00 |
| scRNA      | HY4-L160                | -0.02 | 7.28  | 0.66 | 1.00 |
| tRNA       | chr6.tRNA4-ArgTCG       | -0.05 | 2.79  | 0.66 | 1.00 |
| scRNA      | HY4-L109                | 0.03  | 2.11  | 0.66 | 1.00 |
| scRNA      | HY3-L190                | -0.04 | 2.20  | 0.67 | 1.00 |
| snoRNA     | HBII-289                | -0.02 | 7.18  | 0.67 | 1.00 |
| scRNA      | HY1-L26                 | 0.03  | 2.97  | 0.67 | 1.00 |
| snoRNA     | U18C                    | -0.07 | 1.82  | 0.67 | 1.00 |
| snoRNA     | HBI-100                 | -0.02 | 4.44  | 0.67 | 1.00 |
| scRNA      | HY3-L62                 | -0.06 | 1.83  | 0.67 | 1.00 |
| rRNA       | 5S-L1164                | -0.03 | 2.08  | 0.67 | 1.00 |
| snoRNA     | U58A                    | -0.03 | 5.02  | 0.67 | 1.00 |
| piRNA      | piR-57824               | 0.05  | 1.45  | 0.67 | 1.00 |
| scRNA      | HY4-L81                 | -0.03 | 3.17  | 0.67 | 1.00 |



|            |                       |       |       |      |      |
|------------|-----------------------|-------|-------|------|------|
| tRNA       | chr1.tRNA33-Pseudo??? | -0.03 | 3.32  | 0.67 | 1.00 |
| snoRNA     | U48                   | -0.03 | 5.72  | 0.67 | 1.00 |
| rRNA       | 5S-L1270              | 0.04  | 1.27  | 0.67 | 1.00 |
| mir-5p3pno | hsa-miR-484           | 0.02  | 6.24  | 0.67 | 1.00 |
| scRNA      | HY3-L282              | -0.03 | 3.75  | 0.67 | 1.00 |
| mir-5p     | hsa-miR-181b-5p-L2    | 0.02  | 6.05  | 0.67 | 1.00 |
| mir-5p3pno | hsa-miR-4473          | -0.06 | 1.40  | 0.68 | 1.00 |
| piRNA      | piR-32377             | -0.02 | 6.91  | 0.68 | 1.00 |
| tRNA       | chr17.tRNA23-ArgCCG   | 0.03  | 3.40  | 0.68 | 1.00 |
| mir-5p3pno | hsa-miR-215           | -0.03 | 3.83  | 0.68 | 1.00 |
| mir-5p     | hsa-miR-5010-5p       | -0.05 | 1.44  | 0.68 | 1.00 |
| rRNA       | 5S-L101               | -0.02 | 9.06  | 0.68 | 1.00 |
| mir-3p     | hsa-miR-27b-3p        | 0.01  | 8.94  | 0.68 | 1.00 |
| rRNA       | LSU-rRNA_Hsa-L39      | -0.02 | 7.57  | 0.68 | 1.00 |
| snoRNA     | U20                   | 0.03  | 6.66  | 0.68 | 1.00 |
| mir-3p     | hsa-miR-22-3p         | 0.01  | 10.18 | 0.68 | 1.00 |
| rRNA       | 5S-L297               | 0.05  | 1.59  | 0.68 | 1.00 |
| scRNA      | HY1-L276              | -0.03 | 3.15  | 0.68 | 1.00 |
| mir-5p3pno | hsa-miR-4472-L2       | -0.05 | 1.83  | 0.68 | 1.00 |
| tRNA       | chr6.tRNA130-GlnTTG   | 0.03  | 3.35  | 0.68 | 1.00 |
| mir-3p     | hsa-miR-339-3p        | -0.03 | 2.88  | 0.69 | 1.00 |
| mir-5p     | hsa-miR-16-5p-L2      | 0.02  | 8.44  | 0.69 | 1.00 |
| mir-3p     | hsa-miR-185-3p        | -0.03 | 2.98  | 0.69 | 1.00 |
| piRNA      | piR-36412             | -0.03 | 2.36  | 0.69 | 1.00 |
| tRNA       | chr14.tRNA3-ProTGG    | -0.03 | 3.97  | 0.69 | 1.00 |
| scRNA      | HY4-L36               | -0.04 | 2.19  | 0.69 | 1.00 |
| mir-3p     | hsa-miR-140-3p        | -0.02 | 9.02  | 0.69 | 1.00 |
| tRNA       | chr2.tRNA1-PseudoCCC  | -0.02 | 5.86  | 0.69 | 1.00 |
| mir-5p     | hsa-miR-374a-5p       | -0.03 | 2.91  | 0.69 | 1.00 |
| tRNA       | chr18.tRNA4-LysCTT    | -0.02 | 6.31  | 0.69 | 1.00 |
| rRNA       | LSU-rRNA_Hsa-L198     | -0.02 | 7.74  | 0.69 | 1.00 |
| mir-5p     | hsa-miR-6723-5p       | 0.03  | 4.58  | 0.70 | 1.00 |
| scRNA      | HY1-L171              | 0.03  | 1.68  | 0.70 | 1.00 |
| tRNA       | chr16.tRNA22-MetCAT   | 0.03  | 3.03  | 0.70 | 1.00 |
| mir-5p3pno | hsa-miR-651           | 0.02  | 3.29  | 0.70 | 1.00 |
| mir-5p     | hsa-miR-3184-5p       | -0.01 | 7.99  | 0.70 | 1.00 |
| snRNA      | U4-L40                | -0.03 | 2.99  | 0.70 | 1.00 |
| mir-3p     | hsa-miR-505-3p        | -0.04 | 2.00  | 0.70 | 1.00 |
| snoRNA     | HBII-210              | -0.03 | 5.46  | 0.70 | 1.00 |
| mir-5p     | hsa-miR-642b-5p       | 0.05  | 1.56  | 0.70 | 1.00 |
| scRNA      | HY1-L208              | 0.02  | 3.29  | 0.70 | 1.00 |
| snoRNA     | ACA34                 | -0.03 | 4.14  | 0.70 | 1.00 |
| mir-5p3pno | hsa-miR-942           | 0.03  | 3.31  | 0.70 | 1.00 |

|            |                             |       |       |      |      |
|------------|-----------------------------|-------|-------|------|------|
| rRNA       | 5S-L573                     | -0.03 | 3.03  | 0.70 | 1.00 |
| piRNA      | piR-36376                   | -0.03 | 2.64  | 0.71 | 1.00 |
| tRNA       | chr1.tRNA58-LeuCAA          | -0.03 | 3.40  | 0.71 | 1.00 |
| snoRNA     | snR38B                      | -0.04 | 3.26  | 0.71 | 1.00 |
| mir-5p     | hsa-miR-411-5p              | 0.04  | 2.70  | 0.71 | 1.00 |
| scRNA      | HY3-L203                    | 0.03  | 1.78  | 0.71 | 1.00 |
| scRNA      | HY3-L208                    | -0.04 | 1.34  | 0.71 | 1.00 |
| mir-5p3pno | hsa-miR-378f                | 0.03  | 1.69  | 0.71 | 1.00 |
| snoRNA     | mgU6-47                     | -0.06 | 1.72  | 0.71 | 1.00 |
| mir-3p     | hsa-let-7d-3p               | 0.02  | 6.61  | 0.71 | 1.00 |
| snoRNA     | ACA54                       | 0.04  | 1.59  | 0.71 | 1.00 |
| mir-3p     | hsa-miR-151a-3p             | -0.02 | 11.62 | 0.71 | 1.00 |
| scRNA      | BC200-L11                   | 0.05  | 1.53  | 0.72 | 1.00 |
| scRNA      | HY1-L179                    | 0.02  | 6.39  | 0.72 | 1.00 |
| tRNA       | chr13.tRNA5-GluTTC          | -0.02 | 8.98  | 0.72 | 1.00 |
| mir-5p     | hsa-miR-660-5p              | 0.02  | 3.50  | 0.72 | 1.00 |
| scRNA      | HY3-L105                    | -0.03 | 3.97  | 0.72 | 1.00 |
| scRNA      | HY1-L442                    | 0.04  | 1.33  | 0.72 | 1.00 |
| snoRNA     | U91                         | -0.06 | 2.24  | 0.72 | 1.00 |
| tRNA       | chr7.tRNA3-ArgCCT           | -0.02 | 5.38  | 0.72 | 1.00 |
| scRNA      | HY4-L162                    | -0.03 | 1.65  | 0.72 | 1.00 |
| mir-5p     | hsa-miR-125b-5p-L2          | 0.03  | 3.27  | 0.72 | 1.00 |
| tRNA       | chr16.tRNA27-LeuTAG         | -0.04 | 2.11  | 0.72 | 1.00 |
| piRNA      | piR-36444                   | -0.03 | 2.53  | 0.72 | 1.00 |
| mir-5p3pno | hsa-miR-320c                | 0.02  | 4.43  | 0.72 | 1.00 |
| mir-5p3pno | hsa-miR-378e                | 0.04  | 1.49  | 0.72 | 1.00 |
| rRNA       | 5S-L1075                    | -0.03 | 3.11  | 0.72 | 1.00 |
| rRNA       | LSU-rRNA_Hsa-L165           | 0.02  | 7.53  | 0.72 | 1.00 |
| rRNA       | LSU-rRNA_Hsa-L345           | -0.03 | 2.84  | 0.72 | 1.00 |
| piRNA      | piR-33151-L8                | -0.02 | 4.43  | 0.72 | 1.00 |
| tRF5       | chrX.tRNA1-PseudoTTG-tRF5   | -0.03 | 2.77  | 0.72 | 1.00 |
| mir-3p     | hsa-miR-423-3p              | -0.01 | 8.89  | 0.72 | 1.00 |
| scRNA      | HY4-L56                     | -0.03 | 1.81  | 0.73 | 1.00 |
| tRF5       | chr1.tRNA104-PseudoGTT-tRF5 | -0.03 | 2.69  | 0.73 | 1.00 |
| mir-5p3pno | hsa-miR-1284                | 0.04  | 1.70  | 0.73 | 1.00 |
| mir-5p     | hsa-miR-145-5p              | 0.04  | 1.79  | 0.73 | 1.00 |
| scRNA      | HY1-L324                    | 0.03  | 1.92  | 0.73 | 1.00 |
| scRNA      | BC200-L167                  | -0.04 | 1.58  | 0.73 | 1.00 |
| piRNA      | piR-36707                   | 0.02  | 5.03  | 0.73 | 1.00 |
| snRNA      | U4-L41                      | -0.04 | 2.29  | 0.73 | 1.00 |
| mir-5p     | hsa-miR-450b-5p             | 0.02  | 5.25  | 0.73 | 1.00 |
| tRNA       | chr10.tRNA6-ValTAC          | -0.04 | 1.49  | 0.73 | 1.00 |
| scRNA      | BC200-L69                   | 0.04  | 1.43  | 0.73 | 1.00 |

|            |                          |       |       |      |      |
|------------|--------------------------|-------|-------|------|------|
| mir-3p     | hsa-miR-130a-3p          | 0.02  | 3.58  | 0.73 | 1.00 |
| piRNA      | piR-36041                | -0.02 | 7.32  | 0.73 | 1.00 |
| mir-5p     | hsa-miR-483-5p           | 0.02  | 4.02  | 0.73 | 1.00 |
| tRF5       | chr1.tRNA98-ValCAC-tRF5  | 0.03  | 2.65  | 0.73 | 1.00 |
| rRNA       | LSU-rRNA_Hsa-L331        | 0.04  | 1.53  | 0.73 | 1.00 |
| piRNA      | piR-36499                | 0.03  | 1.68  | 0.73 | 1.00 |
| tRNA       | chr22.tRNA1-SeCTCA       | -0.03 | 2.22  | 0.74 | 1.00 |
| scRNA      | HY1-L227                 | -0.04 | 1.30  | 0.74 | 1.00 |
| mir-3p     | hsa-miR-628-3p           | 0.02  | 3.76  | 0.74 | 1.00 |
| tRNA       | chr1.tRNA16-HisGTG       | -0.01 | 11.64 | 0.74 | 1.00 |
| snoRNA     | U104                     | 0.02  | 7.46  | 0.74 | 1.00 |
| mir-3p     | hsa-miR-374c-3p          | -0.02 | 2.90  | 0.74 | 1.00 |
| mir-3p     | hsa-miR-3184-3p          | 0.01  | 11.60 | 0.74 | 1.00 |
| scRNA      | HY1-L434                 | 0.01  | 6.45  | 0.74 | 1.00 |
| snoRNA     | U33                      | -0.02 | 4.23  | 0.74 | 1.00 |
| rRNA       | LSU-rRNA_Hsa-L355        | 0.02  | 3.31  | 0.74 | 1.00 |
| mir-5p     | hsa-miR-129-5p-L2        | -0.03 | 1.82  | 0.74 | 1.00 |
| tRNA       | chr1.tRNA117-GlyTCC      | -0.02 | 2.71  | 0.74 | 1.00 |
| rRNA       | LSU-rRNA_Hsa-L51         | 0.03  | 4.19  | 0.74 | 1.00 |
| mir-5p3pno | hsa-miR-4488             | 0.03  | 1.35  | 0.74 | 1.00 |
| scRNA      | HY1-L391                 | -0.01 | 14.88 | 0.74 | 1.00 |
| piRNA      | piR-43995-L4             | -0.01 | 6.52  | 0.74 | 1.00 |
| scRNA      | BC200-L9                 | 0.02  | 2.83  | 0.74 | 1.00 |
| scRNA      | HY3-L35                  | -0.04 | 2.20  | 0.74 | 1.00 |
| rRNA       | 5S-L111                  | -0.01 | 10.31 | 0.74 | 1.00 |
| scRNA      | BC200-L18                | 0.03  | 3.08  | 0.74 | 1.00 |
| scRNA      | HY1-L300                 | 0.03  | 2.19  | 0.74 | 1.00 |
| mir-3p     | hsa-miR-330-3p           | -0.02 | 3.77  | 0.74 | 1.00 |
| rRNA       | SSU-rRNA_Hsa-L73         | 0.01  | 14.22 | 0.74 | 1.00 |
| rRNA       | LSU-rRNA_Hsa-L257        | -0.02 | 4.58  | 0.74 | 1.00 |
| snRNA      | U2-L981                  | 0.04  | 4.06  | 0.75 | 1.00 |
| tRF5       | chr3.tRNA5-LeuAAG-tRF5   | 0.02  | 3.59  | 0.75 | 1.00 |
| scRNA      | HY3-L120                 | 0.02  | 2.34  | 0.75 | 1.00 |
| scRNA      | HY1-L57                  | -0.02 | 2.78  | 0.75 | 1.00 |
| piRNA      | piR-38502                | -0.03 | 3.33  | 0.75 | 1.00 |
| scRNA      | HY4-L89                  | -0.02 | 8.76  | 0.75 | 1.00 |
| snoRNA     | SNORD125                 | -0.05 | 1.68  | 0.75 | 1.00 |
| mir-5p     | hsa-miR-3074-5p          | 0.01  | 9.31  | 0.75 | 1.00 |
| snoRNA     | SNORD119                 | 0.03  | 5.61  | 0.75 | 1.00 |
| rRNA       | 5S-L877                  | -0.03 | 2.33  | 0.75 | 1.00 |
| tRNA       | chr5.tRNA4-ValAAC        | 0.03  | 2.29  | 0.75 | 1.00 |
| tRF5       | chr6.tRNA129-MetCAT-tRF5 | 0.03  | 2.01  | 0.75 | 1.00 |
| tRNA       | chrX.tRNA4-ValTAC        | 0.02  | 5.20  | 0.75 | 1.00 |

|            |                            |       |       |      |      |
|------------|----------------------------|-------|-------|------|------|
| rRNA       | 5S-L109                    | -0.01 | 9.56  | 0.75 | 1.00 |
| tRF5       | chr8.tRNA12-TyrGTA-tRF5    | 0.03  | 2.21  | 0.75 | 1.00 |
| tRNA       | chr6.tRNA77-GluCTC         | -0.02 | 4.24  | 0.75 | 1.00 |
| tRF3       | chr17.tRNA1-Pseudo???-tRF3 | -0.03 | 2.09  | 0.75 | 1.00 |
| mir-3p     | hsa-miR-3605-3p            | -0.03 | 2.12  | 0.75 | 1.00 |
| mir-5p     | hsa-miR-301a-5p            | -0.04 | 1.39  | 0.75 | 1.00 |
| scRNA      | HY4-L152                   | -0.02 | 7.32  | 0.75 | 1.00 |
| rRNA       | LSU-rRNA_Hsa-L384          | -0.01 | 14.09 | 0.75 | 1.00 |
| piRNA      | piR-47305                  | -0.02 | 9.66  | 0.76 | 1.00 |
| snRNA      | U1-L142                    | 0.03  | 4.24  | 0.76 | 1.00 |
| rRNA       | LSU-rRNA_Hsa-L188          | 0.03  | 1.82  | 0.76 | 1.00 |
| rRNA       | 5S-L1068                   | -0.02 | 2.39  | 0.76 | 1.00 |
| snoRNA     | snR38C                     | 0.04  | 2.03  | 0.76 | 1.00 |
| piRNA      | piR-36741-L2               | -0.04 | 1.62  | 0.76 | 1.00 |
| tRNA       | chr16.tRNA34-GlyCCC        | 0.02  | 4.00  | 0.76 | 1.00 |
| mir-5p     | hsa-miR-409-5p             | -0.05 | 1.55  | 0.76 | 1.00 |
| rRNA       | 5S-L688                    | 0.02  | 4.43  | 0.76 | 1.00 |
| piRNA      | piR-61648                  | 0.02  | 2.28  | 0.76 | 1.00 |
| rRNA       | LSU-rRNA_Hsa-L193          | -0.02 | 7.16  | 0.76 | 1.00 |
| piRNA      | piR-33404                  | 0.02  | 6.30  | 0.76 | 1.00 |
| mir-3p     | hsa-miR-1306-3p            | -0.03 | 2.00  | 0.76 | 1.00 |
| snoRNA     | mgU2-19/30                 | -0.02 | 3.71  | 0.76 | 1.00 |
| tRNA       | chr16.tRNA18-GlyGCC        | -0.03 | 1.78  | 0.76 | 1.00 |
| mir-5p     | hsa-miR-361-5p             | 0.02  | 3.47  | 0.76 | 1.00 |
| rRNA       | 5S-L282                    | 0.03  | 1.46  | 0.76 | 1.00 |
| tRNA       | chr5.tRNA8-AlaTGC          | 0.03  | 3.15  | 0.76 | 1.00 |
| piRNA      | piR-60565-L9               | 0.03  | 1.87  | 0.77 | 1.00 |
| rRNA       | LSU-rRNA_Hsa-L208          | -0.01 | 7.16  | 0.77 | 1.00 |
| scRNA      | HY4-L99                    | -0.03 | 1.47  | 0.77 | 1.00 |
| tRF5       | chr14.tRNA8-CysGCA-tRF5    | -0.03 | 2.18  | 0.77 | 1.00 |
| piRNA      | piR-35469                  | 0.03  | 1.70  | 0.77 | 1.00 |
| mir-5p     | hsa-miR-181a-5p-L2         | 0.01  | 8.55  | 0.77 | 1.00 |
| tRNA       | chr6.tRNA98-LeuAAG         | 0.03  | 2.93  | 0.77 | 1.00 |
| tRNA       | chr5.tRNA15-ValAAC         | -0.02 | 4.70  | 0.77 | 1.00 |
| mir-5p3pno | hsa-miR-451a               | 0.01  | 12.70 | 0.77 | 1.00 |
| scRNA      | HY1-L190                   | -0.03 | 2.42  | 0.77 | 1.00 |
| snRNA      | U2-L250                    | -0.03 | 12.48 | 0.78 | 1.00 |
| tRNA       | chr6.tRNA147-SerAGA        | -0.02 | 8.22  | 0.78 | 1.00 |
| rRNA       | 5S-L1014                   | 0.03  | 1.63  | 0.78 | 1.00 |
| scRNA      | HY4-L72                    | -0.01 | 7.28  | 0.78 | 1.00 |
| snoRNA     | U74                        | -0.03 | 5.78  | 0.78 | 1.00 |
| mir-3p     | hsa-miR-106b-3p            | 0.01  | 7.66  | 0.78 | 1.00 |
| mir-3p     | hsa-miR-342-3p             | -0.02 | 3.63  | 0.78 | 1.00 |

|            |                            |       |       |      |      |
|------------|----------------------------|-------|-------|------|------|
| scRNA      | HY4-L151                   | -0.02 | 2.39  | 0.78 | 1.00 |
| scRNA      | HY1-L226                   | 0.02  | 3.29  | 0.79 | 1.00 |
| mir-3p     | hsa-miR-5480-3p-L2         | 0.02  | 3.14  | 0.79 | 1.00 |
| tRF3       | chr15.tRNA6-PseudoCTT-tRF3 | 0.03  | 2.01  | 0.79 | 1.00 |
| mir-3p     | hsa-miR-501-3p             | 0.01  | 4.83  | 0.79 | 1.00 |
| rRNA       | LSU-rRNA_Hsa-L189          | -0.01 | 4.24  | 0.79 | 1.00 |
| scRNA      | HY3-L140                   | 0.02  | 2.64  | 0.79 | 1.00 |
| rRNA       | LSU-rRNA_Hsa-L309          | -0.02 | 8.19  | 0.79 | 1.00 |
| tRNA       | chr16.tRNA2-ArgCCT         | -0.02 | 3.09  | 0.79 | 1.00 |
| scRNA      | BC200-L122                 | -0.02 | 3.31  | 0.79 | 1.00 |
| mir-5p     | hsa-miR-423-5p             | -0.01 | 3.96  | 0.79 | 1.00 |
| rRNA       | 5S-L602                    | -0.02 | 5.12  | 0.79 | 1.00 |
| tRNA       | chr17.tRNA3-GlnCTG         | -0.01 | 6.70  | 0.79 | 1.00 |
| rRNA       | LSU-rRNA_Hsa-L365          | 0.03  | 1.60  | 0.79 | 1.00 |
| tRF5       | chr17.tRNA26-CysGCA-tRF5   | 0.01  | 5.39  | 0.79 | 1.00 |
| mir-3p     | hsa-miR-15b-3p             | -0.02 | 3.61  | 0.79 | 1.00 |
| rRNA       | LSU-rRNA_Hsa-L380          | 0.01  | 13.98 | 0.79 | 1.00 |
| piRNA      | piR-32678-L3               | -0.01 | 10.98 | 0.79 | 1.00 |
| rRNA       | LSU-rRNA_Hsa-L211          | 0.02  | 1.63  | 0.79 | 1.00 |
| snoRNA     | U44                        | 0.02  | 6.36  | 0.79 | 1.00 |
| tRNA       | chrX.tRNA2-LeuTAA          | -0.04 | 1.38  | 0.80 | 1.00 |
| mir-5p3pno | hsa-miR-107                | 0.02  | 1.72  | 0.80 | 1.00 |
| scRNA      | HY1-L184                   | -0.01 | 3.77  | 0.80 | 1.00 |
| tRNA       | chr6.tRNA136-ValAAC        | -0.03 | 2.04  | 0.80 | 1.00 |
| rRNA       | LSU-rRNA_Hsa-L43           | -0.03 | 1.53  | 0.80 | 1.00 |
| mir-3p     | hsa-miR-539-3p             | 0.03  | 1.61  | 0.80 | 1.00 |
| scRNA      | HY3-L492                   | 0.03  | 1.45  | 0.80 | 1.00 |
| piRNA      | piR-31068-L10              | 0.03  | 2.12  | 0.80 | 1.00 |
| piRNA      | piR-35413-L2               | -0.02 | 1.56  | 0.80 | 1.00 |
| tRNA       | chr6.tRNA128-GlyGCC        | 0.01  | 4.35  | 0.80 | 1.00 |
| scRNA      | HY1-L389                   | -0.02 | 2.66  | 0.80 | 1.00 |
| mir-5p     | hsa-miR-139-5p             | -0.01 | 6.03  | 0.80 | 1.00 |
| scRNA      | HY1-L279                   | 0.01  | 4.02  | 0.80 | 1.00 |
| scRNA      | HY4-L92                    | 0.02  | 1.42  | 0.80 | 1.00 |
| tRNA       | chr2.tRNA11-PseudoTTG      | -0.02 | 6.71  | 0.80 | 1.00 |
| mir-5p3pno | hsa-miR-511-L2             | 0.02  | 3.90  | 0.80 | 1.00 |
| snRNA      | U2-L825                    | 0.03  | 3.19  | 0.81 | 1.00 |
| mir-5p     | hsa-miR-10a-5p             | 0.01  | 8.93  | 0.81 | 1.00 |
| scRNA      | BC200-L38                  | 0.04  | 1.59  | 0.81 | 1.00 |
| mir-3p     | hsa-miR-142-3p             | -0.01 | 5.68  | 0.81 | 1.00 |
| rRNA       | 5S-L1070                   | 0.03  | 1.47  | 0.81 | 1.00 |
| piRNA      | piR-30890                  | -0.02 | 3.30  | 0.81 | 1.00 |
| tRNA       | chr12.tRNA2-SerCGA         | -0.04 | 1.52  | 0.81 | 1.00 |

|            |                            |       |      |      |      |
|------------|----------------------------|-------|------|------|------|
| snRNA      | U3-L4                      | -0.03 | 1.56 | 0.82 | 1.00 |
| mir-3p     | hsa-miR-29a-3p             | 0.01  | 5.96 | 0.82 | 1.00 |
| mir-5p3pno | hsa-miR-941                | 0.01  | 6.39 | 0.82 | 1.00 |
| tRNA       | chr17.tRNA15-CysGCA        | -0.01 | 6.11 | 0.82 | 1.00 |
| rRNA       | 5S-L983                    | 0.02  | 1.77 | 0.82 | 1.00 |
| piRNA      | piR-31115-L2               | -0.01 | 6.67 | 0.82 | 1.00 |
| snoRNA     | U93                        | 0.03  | 1.72 | 0.82 | 1.00 |
| tRF3       | chrX.tRNA2-LeuTAA-tRF3     | 0.02  | 1.81 | 0.82 | 1.00 |
| mir-3p     | hsa-miR-381-3p             | -0.02 | 4.43 | 0.82 | 1.00 |
| tRF3       | chr10.tRNA2-SerTGA-tRF3    | -0.03 | 2.00 | 0.82 | 1.00 |
| snoRNA     | HBII-180C                  | 0.01  | 4.12 | 0.83 | 1.00 |
| scRNA      | HY1-L155                   | -0.02 | 2.69 | 0.83 | 1.00 |
| piRNA      | piR-41588                  | -0.02 | 1.60 | 0.83 | 1.00 |
| scRNA      | BC200-L67                  | 0.02  | 4.18 | 0.83 | 1.00 |
| scRNA      | HY4-L142                   | -0.01 | 3.10 | 0.83 | 1.00 |
| scRNA      | HY5-L9                     | -0.03 | 1.40 | 0.83 | 1.00 |
| scRNA      | HY5-L19                    | 0.02  | 2.11 | 0.83 | 1.00 |
| tRNA       | chr14.tRNA12-PseudoTTT     | 0.03  | 1.56 | 0.83 | 1.00 |
| mir-5p     | hsa-miR-425-5p             | -0.01 | 5.12 | 0.83 | 1.00 |
| rRNA       | LSU-rRNA_Hsa-L214          | 0.03  | 2.13 | 0.83 | 1.00 |
| scRNA      | HY1-L223                   | -0.01 | 6.19 | 0.83 | 1.00 |
| mir-5p3pno | hsa-miR-1908               | -0.02 | 3.09 | 0.83 | 1.00 |
| scRNA      | HY1-L430                   | 0.03  | 1.34 | 0.83 | 1.00 |
| snoRNA     | HBII-85-8                  | 0.03  | 2.21 | 0.83 | 1.00 |
| rRNA       | SSU-rRNA_Hsa-L50           | -0.01 | 4.47 | 0.83 | 1.00 |
| tRF5       | chr20.tRNA7-PseudoCTC-tRF5 | -0.02 | 1.40 | 0.84 | 1.00 |
| piRNA      | piR-31935                  | -0.01 | 4.57 | 0.84 | 1.00 |
| piRNA      | piR-34804                  | -0.01 | 4.98 | 0.84 | 1.00 |
| mir-3p     | hsa-miR-10a-3p             | -0.02 | 1.82 | 0.84 | 1.00 |
| scRNA      | HY1-L111                   | -0.02 | 1.94 | 0.84 | 1.00 |
| mir-3p     | hsa-miR-30c-2-3p           | -0.03 | 1.38 | 0.84 | 1.00 |
| mir-5p     | hsa-miR-199b-5p            | -0.02 | 2.97 | 0.84 | 1.00 |
| rRNA       | 5S-L233                    | -0.02 | 2.20 | 0.84 | 1.00 |
| snRNA      | U2-L388                    | -0.01 | 3.41 | 0.84 | 1.00 |
| snoRNA     | ACA61                      | -0.03 | 2.02 | 0.84 | 1.00 |
| scRNA      | HY4-L77                    | -0.02 | 2.15 | 0.84 | 1.00 |
| rRNA       | 5S-L731                    | -0.02 | 1.51 | 0.84 | 1.00 |
| rRNA       | LSU-rRNA_Hsa-L150          | -0.01 | 3.40 | 0.84 | 1.00 |
| snRNA      | U7-L159                    | -0.03 | 1.62 | 0.84 | 1.00 |
| tRNA       | chr7.tRNA8-CysGCA          | 0.02  | 1.87 | 0.84 | 1.00 |
| scRNA      | HY1-L419                   | -0.01 | 3.95 | 0.84 | 1.00 |
| snoRNA     | ACA3-2                     | 0.02  | 2.59 | 0.84 | 1.00 |
| rRNA       | LSU-rRNA_Hsa-L29           | -0.01 | 2.54 | 0.84 | 1.00 |

|            |                            |       |       |      |      |
|------------|----------------------------|-------|-------|------|------|
| snRNA      | U2-L537                    | 0.03  | 2.76  | 0.84 | 1.00 |
| mir-3p     | hsa-miR-409-3p             | 0.01  | 5.71  | 0.84 | 1.00 |
| scRNA      | HY4-L30                    | -0.01 | 3.53  | 0.85 | 1.00 |
| piRNA      | piR-35952-L4               | 0.02  | 3.22  | 0.85 | 1.00 |
| rRNA       | LSU-rRNA_Hsa-L15           | 0.01  | 6.48  | 0.85 | 1.00 |
| rRNA       | LSU-rRNA_Hsa-L144          | 0.02  | 1.61  | 0.85 | 1.00 |
| rRNA       | LSU-rRNA_Hsa-L366          | 0.01  | 4.93  | 0.85 | 1.00 |
| mir-5p     | hsa-miR-379-5p             | 0.01  | 5.35  | 0.85 | 1.00 |
| piRNA      | piR-36074                  | -0.01 | 4.27  | 0.85 | 1.00 |
| tRF3       | chr20.tRNA4-PseudoTAA-tRF3 | 0.01  | 4.75  | 0.85 | 1.00 |
| tRNA       | chr2.tRNA23-GlnTTG         | -0.02 | 3.06  | 0.85 | 1.00 |
| mir-3p     | hsa-miR-425-3p             | -0.01 | 4.14  | 0.85 | 1.00 |
| mir-5p     | hsa-miR-30d-5p             | 0.01  | 10.84 | 0.85 | 1.00 |
| tRNA       | chr1.tRNA119-LysCTT        | -0.01 | 7.12  | 0.85 | 1.00 |
| rRNA       | LSU-rRNA_Hsa-L387          | -0.01 | 9.35  | 0.85 | 1.00 |
| tRNA       | chr6.tRNA40-ValTAC         | -0.01 | 2.73  | 0.86 | 1.00 |
| rRNA       | LSU-rRNA_Hsa-L109          | 0.02  | 1.47  | 0.86 | 1.00 |
| scRNA      | HY1-L352                   | 0.02  | 1.78  | 0.86 | 1.00 |
| snRNA      | U5-L76                     | 0.02  | 2.56  | 0.86 | 1.00 |
| snoRNA     | U26                        | 0.01  | 8.56  | 0.86 | 1.00 |
| tRNA       | chr1.tRNA9-ArgTCT          | -0.01 | 2.50  | 0.86 | 1.00 |
| scRNA      | BC200-L126                 | -0.01 | 3.33  | 0.86 | 1.00 |
| scRNA      | HY1-L397                   | -0.01 | 3.27  | 0.86 | 1.00 |
| rRNA       | LSU-rRNA_Hsa-L382          | 0.01  | 13.70 | 0.86 | 1.00 |
| rRNA       | LSU-rRNA_Hsa-L164          | -0.01 | 5.97  | 0.86 | 1.00 |
| mir-5p     | hsa-miR-142-5p             | 0.01  | 5.73  | 0.86 | 1.00 |
| tRNA       | chr12.tRNA6-TrpCCA         | 0.01  | 2.86  | 0.86 | 1.00 |
| rRNA       | 5S-L526                    | 0.02  | 1.32  | 0.86 | 1.00 |
| mir-5p     | hsa-miR-22-5p              | 0.01  | 3.80  | 0.87 | 1.00 |
| mir-5p3pno | hsa-miR-1180               | 0.01  | 4.05  | 0.87 | 1.00 |
| mir-3p     | hsa-miR-323a-3p            | 0.01  | 3.26  | 0.87 | 1.00 |
| tRNA       | chr17.tRNA2-LysTTT         | 0.01  | 3.04  | 0.87 | 1.00 |
| rRNA       | LSU-rRNA_Hsa-L147          | -0.02 | 2.70  | 0.87 | 1.00 |
| mir-3p     | hsa-miR-1285-3p            | 0.01  | 3.54  | 0.87 | 1.00 |
| rRNA       | 5S-L1115                   | 0.02  | 1.30  | 0.87 | 1.00 |
| mir-5p     | hsa-miR-584-5p             | 0.01  | 7.31  | 0.87 | 1.00 |
| scRNA      | HY1-L10                    | 0.01  | 1.55  | 0.87 | 1.00 |
| mir-5p     | hsa-miR-424-5p             | 0.01  | 2.86  | 0.87 | 1.00 |
| piRNA      | piR-57516                  | -0.01 | 5.25  | 0.88 | 1.00 |
| mir-3p     | hsa-miR-132-3p             | 0.02  | 1.92  | 0.88 | 1.00 |
| mir-3p     | hsa-miR-2355-3p            | -0.01 | 1.86  | 0.88 | 1.00 |
| mir-3p     | hsa-miR-1273g-3p           | -0.01 | 5.83  | 0.88 | 1.00 |
| mir-3p     | hsa-miR-1185-1-3p          | 0.02  | 2.25  | 0.88 | 1.00 |

|            |                          |       |       |      |      |
|------------|--------------------------|-------|-------|------|------|
| scRNA      | HY1-L13                  | 0.01  | 2.51  | 0.88 | 1.00 |
| tRF5       | chr17.tRNA25-SeCTCA-tRF5 | -0.02 | 2.25  | 0.88 | 1.00 |
| piRNA      | piR-60565-L12            | -0.01 | 10.99 | 0.88 | 1.00 |
| scRNA      | HY1-L239                 | 0.01  | 4.37  | 0.88 | 1.00 |
| scRNA      | BC200-L110               | -0.03 | 1.47  | 0.88 | 1.00 |
| mir-3p     | hsa-miR-10b-3p           | -0.01 | 1.70  | 0.88 | 1.00 |
| scRNA      | HY1                      | 0.01  | 6.00  | 0.88 | 1.00 |
| rRNA       | 5S-L71                   | -0.02 | 1.74  | 0.88 | 1.00 |
| scRNA      | BC200-L101               | -0.02 | 1.85  | 0.88 | 1.00 |
| rRNA       | 5S-L1143                 | 0.02  | 1.64  | 0.88 | 1.00 |
| rRNA       | 5S-L995                  | -0.02 | 3.46  | 0.88 | 1.00 |
| piRNA      | piR-35548-L2             | -0.01 | 7.18  | 0.89 | 1.00 |
| snRNA      | U2-L615                  | -0.02 | 13.00 | 0.89 | 1.00 |
| scRNA      | HY3-L34                  | 0.01  | 3.61  | 0.89 | 1.00 |
| scRNA      | HY3-L177                 | 0.01  | 1.54  | 0.89 | 1.00 |
| tRNA       | chr6.tRNA166-AlaAGC      | 0.01  | 1.77  | 0.89 | 1.00 |
| rRNA       | 5S-L107                  | -0.01 | 10.07 | 0.89 | 1.00 |
| rRNA       | SSU-rRNA_Hsa-L3          | -0.02 | 1.28  | 0.89 | 1.00 |
| piRNA      | piR-34535                | 0.01  | 5.56  | 0.89 | 1.00 |
| mir-3p     | hsa-miR-625-3p           | 0.01  | 4.68  | 0.89 | 1.00 |
| scRNA      | HY1-L192                 | -0.01 | 5.99  | 0.89 | 1.00 |
| scRNA      | HY1-L67                  | -0.01 | 6.00  | 0.89 | 1.00 |
| mir-3p     | hsa-miR-19a-3p           | -0.01 | 4.16  | 0.89 | 1.00 |
| piRNA      | piR-30112                | 0.01  | 2.68  | 0.89 | 1.00 |
| rRNA       | LSU-rRNA_Hsa-L203        | -0.01 | 5.91  | 0.89 | 1.00 |
| rRNA       | LSU-rRNA_Hsa-L350        | -0.01 | 10.47 | 0.89 | 1.00 |
| scRNA      | BC200-L8                 | -0.01 | 2.74  | 0.89 | 1.00 |
| tRNA       | chr6.tRNA31-SerGCT       | -0.02 | 3.19  | 0.89 | 1.00 |
| mir-5p3pno | hsa-miR-378d-L2          | -0.01 | 1.37  | 0.90 | 1.00 |
| rRNA       | LSU-rRNA_Hsa-L300        | 0.01  | 7.63  | 0.90 | 1.00 |
| mir-3p     | hsa-miR-576-3p           | -0.01 | 4.04  | 0.90 | 1.00 |
| snRNA      | U2-L342                  | 0.01  | 5.41  | 0.90 | 1.00 |
| scRNA      | HY4-L12                  | 0.01  | 5.27  | 0.90 | 1.00 |
| rRNA       | 5S-L676                  | 0.01  | 1.34  | 0.90 | 1.00 |
| mir-3p     | hsa-miR-127-3p           | -0.01 | 5.06  | 0.90 | 1.00 |
| tRNA       | chr6.tRNA105-AlaAGC      | -0.02 | 1.66  | 0.90 | 1.00 |
| scRNA      | HY3-L432                 | -0.01 | 1.48  | 0.90 | 1.00 |
| scRNA      | HY4-L34                  | -0.01 | 1.71  | 0.90 | 1.00 |
| tRNA       | chr13.tRNA4-GluCTC       | -0.01 | 2.04  | 0.90 | 1.00 |
| mir-5p3pno | hsa-miR-128              | -0.01 | 8.32  | 0.90 | 1.00 |
| scRNA      | HY1-L3                   | -0.01 | 3.10  | 0.90 | 1.00 |
| tRNA       | chr1.tRNA54-LysTTT       | -0.01 | 8.24  | 0.90 | 1.00 |
| rRNA       | SSU-rRNA_Hsa-L67         | -0.01 | 3.08  | 0.90 | 1.00 |



|            |                          |       |       |      |      |
|------------|--------------------------|-------|-------|------|------|
| scRNA      | HY1-L292                 | -0.01 | 5.48  | 0.90 | 1.00 |
| snoRNA     | U76                      | -0.01 | 2.36  | 0.90 | 1.00 |
| snoRNA     | mgh28S-2411              | 0.01  | 6.56  | 0.90 | 1.00 |
| scRNA      | HY4-L150                 | -0.01 | 3.26  | 0.90 | 1.00 |
| mir-5p     | hsa-miR-125a-5p          | 0.01  | 4.98  | 0.90 | 1.00 |
| mir-5p3pno | hsa-miR-2110             | 0.00  | 5.17  | 0.90 | 1.00 |
| snoRNA     | HBII-234                 | -0.02 | 2.39  | 0.90 | 1.00 |
| tRNA       | chr16.tRNA17-LeuCAG      | 0.01  | 3.37  | 0.91 | 1.00 |
| piRNA      | piR-33160                | 0.01  | 1.68  | 0.91 | 1.00 |
| piRNA      | piR-33650                | -0.01 | 3.04  | 0.91 | 1.00 |
| piRNA      | piR-59299                | 0.01  | 1.72  | 0.91 | 1.00 |
| tRNA       | chr1.tRNA18-PseudoCCT    | 0.01  | 1.66  | 0.91 | 1.00 |
| mir-3p     | hsa-miR-99b-3p           | 0.01  | 3.53  | 0.91 | 1.00 |
| mir-3p     | hsa-miR-125a-3p          | 0.01  | 3.83  | 0.91 | 1.00 |
| mir-3p     | hsa-miR-18a-3p           | 0.01  | 2.18  | 0.91 | 1.00 |
| rRNA       | LSU-rRNA_Hsa-L200        | 0.01  | 2.74  | 0.91 | 1.00 |
| snRNA      | U2-L532                  | 0.02  | 3.08  | 0.91 | 1.00 |
| rRNA       | 5S-L112                  | 0.00  | 10.83 | 0.91 | 1.00 |
| scRNA      | HY1-L247                 | 0.01  | 1.49  | 0.91 | 1.00 |
| scRNA      | BC200-L68                | -0.02 | 2.33  | 0.91 | 1.00 |
| mir-5p     | hsa-miR-454-5p           | 0.01  | 2.36  | 0.91 | 1.00 |
| snRNA      | U2-L603                  | -0.01 | 6.16  | 0.91 | 1.00 |
| scRNA      | BC200-L29                | -0.01 | 2.91  | 0.91 | 1.00 |
| tRNA       | chr13.tRNA3-GluTTC       | 0.00  | 10.17 | 0.91 | 1.00 |
| tRNA       | chr6.tRNA66-AlaTGC       | 0.01  | 1.95  | 0.92 | 1.00 |
| scRNA      | HY1-L243                 | 0.00  | 6.54  | 0.92 | 1.00 |
| rRNA       | LSU-rRNA_Hsa-L409        | 0.01  | 4.71  | 0.92 | 1.00 |
| snRNA      | U5-L66                   | -0.01 | 6.99  | 0.92 | 1.00 |
| scRNA      | HY3-L84                  | -0.01 | 6.39  | 0.92 | 1.00 |
| tRNA       | chr17.tRNA10-GlyTCC      | 0.01  | 1.81  | 0.92 | 1.00 |
| scRNA      | HY1-L212                 | -0.01 | 2.69  | 0.92 | 1.00 |
| scRNA      | HY4-L21                  | 0.01  | 2.22  | 0.92 | 1.00 |
| rRNA       | 5S-L471                  | -0.01 | 2.19  | 0.92 | 1.00 |
| rRNA       | 5S-L137                  | -0.01 | 1.95  | 0.92 | 1.00 |
| tRF3       | chr16.tRNA28-ProTGG-tRF3 | -0.01 | 1.99  | 0.92 | 1.00 |
| mir-5p     | hsa-miR-106a-5p          | 0.01  | 2.83  | 0.92 | 1.00 |
| snoRNA     | U97                      | 0.01  | 1.93  | 0.92 | 1.00 |
| mir-3p     | hsa-miR-16-2-3p          | 0.00  | 7.97  | 0.93 | 1.00 |
| scRNA      | HY1-L103                 | -0.01 | 2.46  | 0.93 | 1.00 |
| tRNA       | chr12.tRNA5-AspGTC       | 0.01  | 4.66  | 0.93 | 1.00 |
| scRNA      | HY1-L277                 | -0.01 | 3.60  | 0.93 | 1.00 |
| mir-5p3pno | hsa-miR-4461             | 0.01  | 2.06  | 0.93 | 1.00 |
| snoRNA     | HBII-166                 | -0.01 | 3.05  | 0.93 | 1.00 |

|            |                     |       |      |      |      |
|------------|---------------------|-------|------|------|------|
| mir-5p     | hsa-miR-3679-5p     | 0.01  | 2.94 | 0.93 | 1.00 |
| scRNA      | BC200-L114          | -0.01 | 2.21 | 0.93 | 1.00 |
| snoRNA     | U16                 | 0.01  | 2.75 | 0.93 | 1.00 |
| mir-5p     | hsa-miR-4746-5p     | 0.01  | 1.73 | 0.93 | 1.00 |
| mir-3p     | hsa-miR-195-3p      | 0.01  | 1.91 | 0.93 | 1.00 |
| scRNA      | HY1-L393            | -0.01 | 1.73 | 0.94 | 1.00 |
| scRNA      | HY1-L100            | 0.00  | 8.91 | 0.94 | 1.00 |
| rRNA       | 5S-L357             | -0.01 | 2.11 | 0.94 | 1.00 |
| scRNA      | HY4-L112            | 0.00  | 3.97 | 0.94 | 1.00 |
| rRNA       | 5S-L1217            | 0.01  | 1.70 | 0.94 | 1.00 |
| mir-3p     | hsa-miR-4742-3p     | 0.00  | 1.43 | 0.94 | 1.00 |
| tRNA       | chr1.tRNA38-LeuCAG  | -0.01 | 3.68 | 0.94 | 1.00 |
| scRNA      | HY4-L52             | 0.00  | 2.37 | 0.94 | 1.00 |
| piRNA      | piR-31987           | 0.00  | 6.33 | 0.94 | 1.00 |
| scRNA      | HY4-L129            | 0.00  | 3.45 | 0.94 | 1.00 |
| mir-5p     | hsa-miR-214-5p      | 0.01  | 1.57 | 0.94 | 1.00 |
| snoRNA     | HBII-99B            | -0.01 | 1.87 | 0.94 | 1.00 |
| piRNA      | piR-37213           | 0.01  | 1.60 | 0.94 | 1.00 |
| snRNA      | U2-L1074            | 0.01  | 3.33 | 0.94 | 1.00 |
| scRNA      | HY1-L259            | 0.00  | 5.48 | 0.94 | 1.00 |
| rRNA       | LSU-rRNA_Hsa-L202   | 0.00  | 3.79 | 0.94 | 1.00 |
| mir-5p     | hsa-miR-24-2-5p     | 0.00  | 4.12 | 0.95 | 1.00 |
| tRNA       | chr17.tRNA31-AsnGTT | -0.01 | 2.61 | 0.95 | 1.00 |
| scRNA      | HY1-L443            | 0.00  | 7.16 | 0.95 | 1.00 |
| rRNA       | 5S-L804             | 0.00  | 4.97 | 0.95 | 1.00 |
| snoRNA     | ACA47               | 0.01  | 3.23 | 0.95 | 1.00 |
| scRNA      | HY1-L28             | -0.01 | 1.58 | 0.95 | 1.00 |
| mir-5p3pno | hsa-miR-1299        | 0.01  | 2.07 | 0.95 | 1.00 |
| mir-3p     | hsa-miR-130b-3p     | -0.01 | 2.46 | 0.95 | 1.00 |
| snRNA      | U2-L782             | -0.01 | 2.99 | 0.95 | 1.00 |
| rRNA       | 5S-L105             | 0.00  | 5.89 | 0.95 | 1.00 |
| mir-5p     | hsa-miR-193b-5p     | -0.01 | 2.08 | 0.95 | 1.00 |
| rRNA       | LSU-rRNA_Hsa-L130   | -0.01 | 4.63 | 0.95 | 1.00 |
| rRNA       | 5S-L247             | 0.00  | 1.54 | 0.95 | 1.00 |
| scRNA      | BC200-L100          | 0.01  | 1.69 | 0.95 | 1.00 |
| rRNA       | LSU-rRNA_Hsa-L143   | 0.00  | 5.07 | 0.95 | 1.00 |
| mir-3p     | hsa-let-7f-1-3p     | 0.01  | 1.61 | 0.95 | 1.00 |
| snoRNA     | U25                 | -0.01 | 5.19 | 0.95 | 1.00 |
| scRNA      | HY4-L149            | 0.00  | 1.76 | 0.95 | 1.00 |
| snoRNA     | U38B                | -0.01 | 2.95 | 0.95 | 1.00 |
| piRNA      | piR-35548-L4        | 0.00  | 7.22 | 0.96 | 1.00 |
| rRNA       | 5S-L397             | 0.01  | 1.55 | 0.96 | 1.00 |
| rRNA       | 5S-L1255            | 0.00  | 1.70 | 0.96 | 1.00 |

|            |                            |       |       |      |      |
|------------|----------------------------|-------|-------|------|------|
| scRNA      | HY1-L374                   | 0.00  | 8.15  | 0.96 | 1.00 |
| mir-5p     | hsa-let-7d-5p              | 0.00  | 8.11  | 0.96 | 1.00 |
| rRNA       | 5S-L1114                   | 0.00  | 1.68  | 0.96 | 1.00 |
| mir-3p     | hsa-miR-191-3p             | 0.01  | 1.89  | 0.96 | 1.00 |
| scRNA      | HY3-L279                   | 0.00  | 5.21  | 0.96 | 1.00 |
| mir-3p     | hsa-miR-92b-3p             | 0.00  | 4.74  | 0.96 | 1.00 |
| piRNA      | piR-35982-L11              | -0.01 | 1.95  | 0.96 | 1.00 |
| snoRNA     | ACA9                       | 0.00  | 1.70  | 0.96 | 1.00 |
| mir-5p3pno | hsa-miR-1250               | -0.01 | 1.50  | 0.96 | 1.00 |
| mir-5p3pno | hsa-miR-760                | 0.00  | 2.38  | 0.96 | 1.00 |
| rRNA       | SSU-rRNA_Hsa-L72           | 0.00  | 14.26 | 0.96 | 1.00 |
| snoRNA     | mgU6-77                    | 0.00  | 4.50  | 0.97 | 1.00 |
| rRNA       | 5S-L829                    | -0.01 | 2.65  | 0.97 | 1.00 |
| tRNA       | chr17.tRNA14-ThrCGT        | 0.00  | 1.87  | 0.97 | 1.00 |
| snoRNA     | ACA45                      | 0.00  | 6.69  | 0.97 | 1.00 |
| mir-3p     | hsa-miR-652-3p             | 0.00  | 3.92  | 0.97 | 1.00 |
| rRNA       | SSU-rRNA_Hsa-L10           | 0.00  | 11.45 | 0.97 | 1.00 |
| scRNA      | HY1-L418                   | 0.00  | 1.64  | 0.97 | 1.00 |
| scRNA      | HY3-L199                   | 0.00  | 1.72  | 0.97 | 1.00 |
| piRNA      | piR-61646-L2               | 0.00  | 8.65  | 0.97 | 1.00 |
| mir-3p     | hsa-miR-24-3p              | 0.00  | 8.44  | 0.97 | 1.00 |
| snRNA      | U2-L709                    | 0.00  | 3.25  | 0.97 | 1.00 |
| piRNA      | piR-60565-L4               | 0.00  | 12.26 | 0.97 | 1.00 |
| snoRNA     | U3-3                       | 0.00  | 2.20  | 0.97 | 1.00 |
| mir-5p3pno | hsa-miR-3138               | 0.01  | 1.71  | 0.97 | 1.00 |
| snoRNA     | HBII-82                    | -0.01 | 2.14  | 0.97 | 1.00 |
| snRNA      | U3-L78                     | 0.00  | 4.40  | 0.97 | 1.00 |
| piRNA      | piR-61648-L7               | 0.00  | 4.08  | 0.97 | 1.00 |
| mir-5p     | hsa-miR-1304-5p            | 0.00  | 1.47  | 0.98 | 1.00 |
| mir-5p     | hsa-miR-146a-5p            | 0.00  | 9.39  | 0.98 | 1.00 |
| rRNA       | 5S-L115                    | 0.00  | 1.96  | 0.98 | 1.00 |
| snRNA      | U17                        | -0.01 | 1.81  | 0.98 | 1.00 |
| rRNA       | 5S-L790                    | 0.00  | 4.09  | 0.98 | 1.00 |
| mir-5p3pno | hsa-miR-3168               | 0.00  | 2.09  | 0.98 | 1.00 |
| piRNA      | piR-50811                  | 0.00  | 3.42  | 0.98 | 1.00 |
| piRNA      | piR-36170                  | 0.00  | 2.57  | 0.98 | 1.00 |
| snRNA      | U1-L47                     | 0.00  | 1.98  | 0.98 | 1.00 |
| scRNA      | HY1-L321                   | 0.00  | 4.61  | 0.98 | 1.00 |
| scRNA      | BC200-L154                 | 0.00  | 1.41  | 0.98 | 1.00 |
| mir-5p3pno | hsa-miR-1246               | 0.00  | 5.82  | 0.98 | 1.00 |
| tRF3       | chr7.tRNA26-PseudoTTG-tRF3 | 0.00  | 2.24  | 0.98 | 1.00 |
| mir-5p     | hsa-miR-20a-5p             | 0.00  | 7.17  | 0.98 | 1.00 |
| rRNA       | LSU-rRNA_Hsa-L178          | 0.00  | 3.24  | 0.98 | 1.00 |

|            |                        |       |       |      |      |
|------------|------------------------|-------|-------|------|------|
| scRNA      | BC200-L117             | 0.00  | 1.83  | 0.98 | 1.00 |
| mir-5p     | hsa-miR-32-5p          | 0.00  | 3.62  | 0.98 | 1.00 |
| snRNA      | U6-L503                | 0.00  | 1.31  | 0.98 | 1.00 |
| mir-5p     | hsa-miR-505-5p         | 0.00  | 1.81  | 0.99 | 1.00 |
| snRNA      | U1-L43                 | 0.00  | 1.93  | 0.99 | 1.00 |
| tRNA       | chr1.tRNA60-PseudoTAA  | 0.00  | 3.73  | 0.99 | 1.00 |
| tRNA       | chr11.tRNA16-ValTAC    | 0.00  | 4.20  | 0.99 | 1.00 |
| mir-5p3pno | hsa-miR-1244-L2        | -0.01 | 1.66  | 0.99 | 1.00 |
| mir-5p3pno | hsa-miR-598            | 0.00  | 1.77  | 0.99 | 1.00 |
| rRNA       | SSU-rRNA_Hsa-L33       | 0.00  | 12.79 | 0.99 | 1.00 |
| mir-3p     | hsa-miR-493-3p         | 0.00  | 3.21  | 0.99 | 1.00 |
| mir-3p     | hsa-miR-26b-3p         | 0.00  | 2.34  | 0.99 | 1.00 |
| snoRNA     | HBII-336               | 0.00  | 2.07  | 0.99 | 1.00 |
| scRNA      | BC200-L85              | 0.00  | 1.95  | 0.99 | 1.00 |
| snRNA      | U4-L24                 | 0.00  | 1.61  | 0.99 | 1.00 |
| tRNA       | chr16.tRNA13-PseudoCTT | 0.00  | 4.70  | 0.99 | 1.00 |
| scRNA      | HY1-L78                | -0.01 | 1.39  | 0.99 | 1.00 |
| mir-5p3pno | hsa-miR-370            | 0.00  | 4.87  | 0.99 | 1.00 |
| mir-5p     | hsa-miR-99b-5p         | 0.00  | 6.89  | 0.99 | 1.00 |
| mir-5p3pno | hsa-miR-210            | 0.00  | 2.15  | 0.99 | 1.00 |
| mir-5p3pno | hsa-miR-3615           | 0.00  | 7.34  | 0.99 | 1.00 |
| snoRNA     | snR39B                 | 0.00  | 5.72  | 1.00 | 1.00 |
| snoRNA     | HBII-13                | 0.00  | 3.91  | 1.00 | 1.00 |
| scRNA      | BC200-L161             | 0.00  | 1.53  | 1.00 | 1.00 |
| scRNA      | HY4-L116               | 0.00  | 3.88  | 1.00 | 1.00 |
| snoRNA     | U73a                   | 0.00  | 1.79  | 1.00 | 1.00 |
| mir-5p3pno | hsa-miR-487b           | 0.00  | 1.50  | 1.00 | 1.00 |
| mir-3p     | hsa-miR-200a-3p        | 0.00  | 2.22  | 1.00 | 1.00 |
| scRNA      | BC200-L139             | 0.00  | 3.27  | 1.00 | 1.00 |

**Supplementary Table 9: RNA correlations with baseline SJC28**

| <i>RNA type</i> | <i>ID</i>              | <i>Average read count (log2 CPM)</i> | <i>Correlation coefficient</i> | <i>P-value</i> | <i>Adjusted P-value</i> |
|-----------------|------------------------|--------------------------------------|--------------------------------|----------------|-------------------------|
| tRNA            | chr1.tRNA131-GlyCCC    | 7.00                                 | 0.14                           | 7.10E-05       | 0.11                    |
| scRNA           | HY4-L36                | 2.19                                 | -0.14                          | 3.02E-04       | 0.15                    |
| mir-5p          | hsa-miR-338-5p         | 4.39                                 | -0.10                          | 3.06E-04       | 0.15                    |
| rRNA            | LSU-rRNA_Hsa-L165      | 7.53                                 | -0.08                          | 1.02E-03       | 0.38                    |
| tRNA            | chr16.tRNA31-PseudoTGG | 3.01                                 | 0.12                           | 1.47E-03       | 0.39                    |
| rRNA            | 5S-L602                | 5.12                                 | 0.08                           | 1.58E-03       | 0.39                    |
| tRNA            | chr1.tRNA137-Pseudo??? | 6.02                                 | -0.09                          | 2.25E-03       | 0.42                    |
| scRNA           | BC200-L76              | 2.55                                 | 0.12                           | 2.26E-03       | 0.42                    |
| mir-5p3pno      | hsa-miR-203a           | 2.28                                 | -0.20                          | 2.54E-03       | 0.42                    |
| mir-3p          | hsa-miR-505-3p         | 2.00                                 | -0.13                          | 3.79E-03       | 0.52                    |
| tRNA            | chr6.tRNA40-ValTAC     | 2.73                                 | -0.10                          | 3.93E-03       | 0.52                    |
| snoRNA          | ACA3                   | 2.48                                 | 0.09                           | 4.29E-03       | 0.52                    |
| rRNA            | 5S-L189                | 2.24                                 | 0.10                           | 4.58E-03       | 0.52                    |
| piRNA           | piR-35548-L2           | 7.18                                 | -0.08                          | 5.36E-03       | 0.57                    |
| scRNA           | HY1-L114               | 3.94                                 | 0.07                           | 6.00E-03       | 0.59                    |
| rRNA            | 5S-L688                | 4.43                                 | 0.07                           | 6.60E-03       | 0.61                    |
| snoRNA          | U73a                   | 1.79                                 | -0.19                          | 7.19E-03       | 0.62                    |
| tRNA            | chr14.tRNA10-IleAAT    | 1.41                                 | -0.15                          | 8.28E-03       | 0.62                    |
| snRNA           | U17                    | 1.81                                 | 0.13                           | 8.51E-03       | 0.62                    |
| scRNA           | HY1-L190               | 2.42                                 | 0.09                           | 8.72E-03       | 0.62                    |
| snoRNA          | U25                    | 5.19                                 | -0.12                          | 8.99E-03       | 0.62                    |
| mir-3p          | hsa-miR-323a-3p        | 3.26                                 | -0.11                          | 9.44E-03       | 0.62                    |
| mir-3p          | hsa-miR-19b-3p         | 4.04                                 | -0.07                          | 9.97E-03       | 0.62                    |
| tRNA            | chr5.tRNA15-ValAAC     | 4.70                                 | -0.07                          | 1.01E-02       | 0.62                    |
| mir-3p          | hsa-miR-450a-3p        | 1.53                                 | -0.14                          | 1.04E-02       | 0.62                    |
| snoRNA          | U23                    | 1.46                                 | 0.11                           | 1.10E-02       | 0.62                    |
| snoRNA          | U80                    | 3.36                                 | 0.09                           | 1.16E-02       | 0.62                    |
| mir-5p3pno      | hsa-miR-487b           | 1.50                                 | -0.17                          | 1.17E-02       | 0.62                    |
| snoRNA          | U36B                   | 1.73                                 | -0.18                          | 1.21E-02       | 0.62                    |
| mir-3p          | hsa-miR-424-3p         | 4.70                                 | -0.07                          | 1.26E-02       | 0.62                    |
| scRNA           | HY1-L442               | 1.33                                 | -0.13                          | 1.40E-02       | 0.66                    |
| snoRNA          | U37                    | 1.76                                 | -0.20                          | 1.52E-02       | 0.66                    |
| snoRNA          | U102                   | 7.38                                 | -0.07                          | 1.55E-02       | 0.66                    |
| mir-5p          | hsa-miR-223-5p         | 8.71                                 | -0.05                          | 1.59E-02       | 0.66                    |
| piRNA           | piR-31038              | 9.22                                 | -0.05                          | 1.60E-02       | 0.66                    |
| mir-3p          | hsa-miR-132-3p         | 1.92                                 | -0.12                          | 1.61E-02       | 0.66                    |
| tRNA            | chrX.tRNA2-LeuTAA      | 1.38                                 | -0.13                          | 1.65E-02       | 0.66                    |
| piRNA           | piR-31068-L10          | 2.13                                 | -0.15                          | 1.75E-02       | 0.66                    |

|            |                          |       |       |          |      |
|------------|--------------------------|-------|-------|----------|------|
| rRNA       | LSU-rRNA_Hsa-L66         | 1.86  | -0.11 | 1.82E-02 | 0.66 |
| mir-3p     | hsa-miR-24-3p            | 8.44  | -0.05 | 1.82E-02 | 0.66 |
| mir-5p     | hsa-miR-132-5p           | 2.49  | -0.11 | 1.83E-02 | 0.66 |
| mir-5p     | hsa-miR-345-5p           | 2.70  | -0.10 | 1.88E-02 | 0.67 |
| scRNA      | HY1-L171                 | 1.68  | -0.09 | 1.93E-02 | 0.67 |
| snoRNA     | U42A                     | 4.44  | -0.11 | 2.00E-02 | 0.68 |
| snoRNA     | HBII-276                 | 3.49  | -0.11 | 2.11E-02 | 0.69 |
| tRNA       | chr1.tRNA79-GlyTCC       | 1.87  | 0.11  | 2.17E-02 | 0.69 |
| rRNA       | 5S-L106                  | 12.29 | 0.05  | 2.23E-02 | 0.69 |
| piRNA      | piR-52416                | 1.72  | 0.15  | 2.24E-02 | 0.69 |
| snRNA      | U1-L17                   | 1.82  | -0.19 | 2.55E-02 | 0.71 |
| snoRNA     | ACA53                    | 3.01  | -0.13 | 2.59E-02 | 0.71 |
| tRNA       | chr11.tRNA8-SerGCT       | 4.09  | -0.07 | 2.63E-02 | 0.71 |
| snoRNA     | HBII-85-15               | 1.65  | -0.17 | 2.70E-02 | 0.71 |
| snoRNA     | U21                      | 4.60  | -0.08 | 2.72E-02 | 0.71 |
| mir-3p     | hsa-miR-148a-3p          | 13.46 | -0.04 | 2.79E-02 | 0.71 |
| piRNA      | piR-33404                | 6.30  | -0.08 | 2.81E-02 | 0.71 |
| mir-3p     | hsa-miR-143-3p           | 9.70  | -0.05 | 2.85E-02 | 0.71 |
| mir-5p3pno | hsa-miR-1976             | 1.89  | -0.10 | 2.86E-02 | 0.71 |
| rRNA       | LSU-rRNA_Hsa-L41         | 1.50  | -0.13 | 2.88E-02 | 0.71 |
| tRF5       | chr17.tRNA21-ArgCCT-tRF5 | 1.46  | 0.12  | 2.96E-02 | 0.71 |
| tRF3       | chr9.tRNA6-AspGTC-tRF3   | 1.45  | -0.11 | 3.03E-02 | 0.71 |
| mir-5p3pno | hsa-miR-548e             | 2.60  | -0.08 | 3.09E-02 | 0.71 |
| snRNA      | U3-L18                   | 6.00  | 0.07  | 3.12E-02 | 0.71 |
| snoRNA     | ACA11                    | 2.12  | -0.11 | 3.20E-02 | 0.71 |
| mir-3p     | hsa-miR-130a-3p          | 3.58  | -0.06 | 3.23E-02 | 0.71 |
| rRNA       | 5S-L790                  | 4.09  | 0.06  | 3.26E-02 | 0.71 |
| tRNA       | chr5.tRNA14-ProTGG       | 4.85  | -0.06 | 3.30E-02 | 0.71 |
| mir-5p3pno | hsa-miR-320b             | 4.99  | -0.05 | 3.35E-02 | 0.71 |
| rRNA       | LSU-rRNA_Hsa-L164        | 5.97  | -0.05 | 3.36E-02 | 0.71 |
| snoRNA     | HBII-251                 | 3.81  | -0.14 | 3.43E-02 | 0.71 |
| snoRNA     | U90                      | 2.75  | 0.11  | 3.50E-02 | 0.71 |
| tRNA       | chr19.tRNA8-SeCTCA       | 5.86  | 0.04  | 3.52E-02 | 0.71 |
| snoRNA     | U79                      | 1.72  | -0.13 | 3.54E-02 | 0.71 |
| tRNA       | chrX.tRNA4-ValTAC        | 5.20  | -0.06 | 3.57E-02 | 0.71 |
| mir-5p3pno | hsa-miR-3609             | 2.87  | -0.10 | 3.61E-02 | 0.71 |
| snRNA      | U2-L288                  | 2.57  | 0.07  | 3.62E-02 | 0.71 |
| rRNA       | 5S-L489                  | 5.18  | -0.24 | 3.63E-02 | 0.71 |
| snoRNA     | U103B                    | 3.29  | -0.11 | 3.73E-02 | 0.72 |
| mir-5p     | hsa-miR-15b-5p           | 2.72  | -0.06 | 3.79E-02 | 0.72 |
| piRNA      | piR-36743                | 3.67  | -0.06 | 3.87E-02 | 0.72 |
| snoRNA     | U3-3                     | 2.20  | -0.12 | 3.93E-02 | 0.72 |
| piRNA      | piR-59299                | 1.72  | -0.10 | 3.94E-02 | 0.72 |

|            |                             |      |       |          |      |
|------------|-----------------------------|------|-------|----------|------|
| rRNA       | LSU-rRNA_Hsa-L251           | 7.46 | -0.04 | 3.96E-02 | 0.72 |
| snRNA      | U1-L45                      | 6.78 | -0.06 | 4.30E-02 | 0.77 |
| tRNA       | chr6.tRNA147-SerAGA         | 8.22 | -0.06 | 4.37E-02 | 0.77 |
| rRNA       | LSU-rRNA_Hsa-L355           | 3.31 | -0.06 | 4.47E-02 | 0.78 |
| rRNA       | 5S-L472                     | 2.70 | 0.07  | 4.48E-02 | 0.78 |
| mir-5p     | hsa-miR-335-5p              | 3.57 | -0.05 | 4.55E-02 | 0.78 |
| scRNA      | BC200-L134                  | 1.43 | 0.09  | 4.70E-02 | 0.79 |
| mir-3p     | hsa-miR-342-3p              | 3.63 | -0.07 | 4.76E-02 | 0.79 |
| snoRNA     | U74                         | 5.78 | -0.08 | 4.78E-02 | 0.79 |
| rRNA       | LSU-rRNA_Hsa-L178           | 3.24 | 0.07  | 4.90E-02 | 0.79 |
| scRNA      | HY1-L45                     | 1.90 | -0.09 | 5.00E-02 | 0.79 |
| rRNA       | LSU-rRNA_Hsa-L249           | 7.95 | -0.04 | 5.10E-02 | 0.79 |
| mir-3p     | hsa-miR-223-3p              | 7.30 | -0.06 | 5.18E-02 | 0.79 |
| scRNA      | HY1-L302                    | 2.49 | -0.06 | 5.19E-02 | 0.79 |
| mir-5p3pno | hsa-miR-651                 | 3.29 | -0.06 | 5.21E-02 | 0.79 |
| tRF5       | chr17.tRNA33-PseudoTTG-tRF5 | 5.92 | -0.06 | 5.40E-02 | 0.79 |
| mir-5p     | hsa-miR-3074-5p             | 9.31 | -0.04 | 5.41E-02 | 0.79 |
| piRNA      | piR-60576-L6                | 8.04 | -0.05 | 5.42E-02 | 0.79 |
| snRNA      | U2-L479                     | 1.54 | 0.10  | 5.45E-02 | 0.79 |
| scRNA      | BC200-L38                   | 1.59 | -0.12 | 5.53E-02 | 0.79 |
| rRNA       | LSU-rRNA_Hsa-L15            | 6.48 | 0.03  | 5.59E-02 | 0.79 |
| rRNA       | LSU-rRNA_Hsa-L130           | 4.63 | 0.09  | 5.66E-02 | 0.79 |
| snRNA      | U7-L159                     | 1.62 | 0.10  | 5.89E-02 | 0.79 |
| snoRNA     | mgh28S-2409                 | 3.15 | -0.10 | 5.96E-02 | 0.79 |
| piRNA      | piR-38354                   | 2.15 | -0.07 | 5.97E-02 | 0.79 |
| scRNA      | BC200-L96                   | 5.30 | 0.05  | 6.04E-02 | 0.79 |
| mir-5p3pno | hsa-miR-543                 | 5.86 | -0.06 | 6.07E-02 | 0.79 |
| mir-3p     | hsa-miR-145-3p              | 4.84 | -0.04 | 6.10E-02 | 0.79 |
| mir-3p     | hsa-miR-654-3p              | 3.75 | -0.08 | 6.24E-02 | 0.79 |
| mir-3p     | hsa-let-7d-3p               | 6.61 | -0.04 | 6.33E-02 | 0.79 |
| mir-3p     | hsa-let-7f-1-3p             | 1.61 | -0.12 | 6.42E-02 | 0.79 |
| piRNA      | piR-36376                   | 2.64 | -0.06 | 6.43E-02 | 0.79 |
| mir-5p3pno | hsa-miR-451b                | 2.85 | -0.07 | 6.43E-02 | 0.79 |
| snoRNA     | U87                         | 1.65 | -0.13 | 6.47E-02 | 0.79 |
| snoRNA     | U104                        | 7.46 | -0.06 | 6.48E-02 | 0.79 |
| rRNA       | 5S-L1164                    | 2.08 | -0.07 | 6.50E-02 | 0.79 |
| mir-5p3pno | hsa-miR-128                 | 8.32 | -0.04 | 6.50E-02 | 0.79 |
| snRNA      | U5-L76                      | 2.56 | -0.08 | 6.57E-02 | 0.79 |
| tRF5       | chr6.tRNA114-ArgCCG-tRF5    | 1.61 | -0.09 | 6.57E-02 | 0.79 |
| mir-5p     | hsa-miR-339-5p              | 1.85 | -0.12 | 6.57E-02 | 0.79 |
| tRNA       | chr6.tRNA85-PseudoTTC       | 4.59 | -0.05 | 6.60E-02 | 0.79 |
| snoRNA     | SNORD127                    | 4.77 | -0.08 | 6.65E-02 | 0.79 |
| snoRNA     | U31                         | 7.96 | -0.05 | 6.67E-02 | 0.79 |

|            |                         |       |       |          |      |
|------------|-------------------------|-------|-------|----------|------|
| mir-5p     | hsa-miR-22-5p           | 3.80  | -0.05 | 6.74E-02 | 0.79 |
| mir-3p     | hsa-miR-495-3p          | 2.88  | -0.09 | 6.83E-02 | 0.79 |
| snoRNA     | E3                      | 2.66  | 0.06  | 6.83E-02 | 0.79 |
| mir-5p3pno | hsa-miR-134             | 6.74  | -0.05 | 6.84E-02 | 0.79 |
| mir-3p     | hsa-miR-29a-3p          | 5.96  | -0.04 | 6.91E-02 | 0.80 |
| mir-5p3pno | hsa-miR-4473            | 1.40  | 0.08  | 7.01E-02 | 0.80 |
| tRNA       | chr8.tRNA5-TyrGTA       | 1.91  | 0.14  | 7.05E-02 | 0.80 |
| snoRNA     | snR38C                  | 2.03  | -0.12 | 7.31E-02 | 0.82 |
| rRNA       | LSU-rRNA_Hsa-L300       | 7.63  | -0.06 | 7.51E-02 | 0.84 |
| mir-3p     | hsa-miR-493-3p          | 3.21  | -0.08 | 7.57E-02 | 0.84 |
| scRNA      | BC200-L161              | 1.53  | 0.08  | 7.59E-02 | 0.84 |
| piRNA      | piR-35982               | 15.63 | -0.06 | 7.74E-02 | 0.85 |
| rRNA       | SSU-rRNA_Hsa-L67        | 3.08  | -0.07 | 7.85E-02 | 0.85 |
| rRNA       | 5S-L1214                | 1.33  | -0.09 | 7.94E-02 | 0.85 |
| rRNA       | SSU-rRNA_Hsa-L24        | 9.30  | 0.03  | 7.96E-02 | 0.85 |
| rRNA       | LSU-rRNA_Hsa-L297       | 1.90  | -0.08 | 8.05E-02 | 0.86 |
| mir-5p3pno | hsa-miR-181d            | 3.90  | -0.04 | 8.19E-02 | 0.86 |
| mir-5p     | hsa-miR-424-5p          | 2.86  | -0.07 | 8.36E-02 | 0.87 |
| mir-5p     | hsa-miR-331-5p          | 1.28  | -0.10 | 8.38E-02 | 0.87 |
| mir-5p     | hsa-miR-574-5p          | 4.85  | 0.05  | 8.54E-02 | 0.87 |
| rRNA       | LSU-rRNA_Hsa-L151       | 3.13  | -0.06 | 8.58E-02 | 0.87 |
| snoRNA     | U42B                    | 4.22  | -0.10 | 8.58E-02 | 0.87 |
| snoRNA     | HBII-289                | 7.18  | -0.04 | 8.70E-02 | 0.87 |
| rRNA       | LSU-rRNA_Hsa-L380       | 13.98 | -0.03 | 8.72E-02 | 0.87 |
| snoRNA     | HBII-239                | 4.70  | -0.05 | 8.79E-02 | 0.87 |
| rRNA       | 5S-L71                  | 1.74  | 0.07  | 8.81E-02 | 0.87 |
| snoRNA     | U52                     | 2.73  | -0.07 | 8.87E-02 | 0.87 |
| snoRNA     | U41                     | 2.48  | -0.09 | 8.92E-02 | 0.87 |
| tRF5       | chr14.tRNA4-ThrTGT-tRF5 | 2.23  | -0.07 | 8.97E-02 | 0.87 |
| rRNA       | LSU-rRNA_Hsa-L34        | 1.35  | -0.09 | 9.01E-02 | 0.87 |
| mir-5p3pno | hsa-miR-6073            | 1.46  | 0.08  | 9.03E-02 | 0.87 |
| mir-5p     | hsa-miR-584-5p          | 7.31  | -0.04 | 9.13E-02 | 0.87 |
| rRNA       | LSU-rRNA_Hsa-L382       | 13.70 | -0.03 | 9.25E-02 | 0.87 |
| mir-3p     | hsa-miR-411-3p          | 1.75  | -0.12 | 9.30E-02 | 0.87 |
| mir-5p     | hsa-miR-361-5p          | 3.48  | -0.06 | 9.30E-02 | 0.87 |
| mir-3p     | hsa-miR-3187-3p         | 1.63  | -0.10 | 9.39E-02 | 0.87 |
| rRNA       | 5S-L612                 | 2.86  | 0.06  | 9.41E-02 | 0.87 |
| mir-5p     | hsa-miR-432-5p          | 5.13  | -0.06 | 9.43E-02 | 0.87 |
| tRNA       | chr1.tRNA15-GlnCTG      | 2.98  | -0.05 | 0.10     | 0.87 |
| scRNA      | BC200-L82               | 1.75  | 0.07  | 0.10     | 0.87 |
| piRNA      | piR-36494               | 2.00  | -0.11 | 0.10     | 0.87 |
| scRNA      | BC200-L37               | 6.33  | -0.03 | 0.10     | 0.87 |
| scRNA      | HY1-L133                | 2.77  | -0.05 | 0.10     | 0.87 |



|            |                            |       |       |      |      |
|------------|----------------------------|-------|-------|------|------|
| piRNA      | piR-36074                  | 4.27  | -0.04 | 0.10 | 0.87 |
| tRNA       | chr6.tRNA37-ValAAC         | 9.05  | -0.04 | 0.10 | 0.87 |
| tRNA       | chr16.tRNA34-GlyCCC        | 4.00  | -0.05 | 0.10 | 0.87 |
| rRNA       | LSU-rRNA_Hsa-L48           | 1.64  | -0.09 | 0.10 | 0.87 |
| snoRNA     | HBII-99B                   | 1.87  | -0.12 | 0.10 | 0.87 |
| rRNA       | SSU-rRNA_Hsa-L10           | 11.45 | -0.03 | 0.10 | 0.87 |
| piRNA      | piR-62011                  | 8.25  | 0.03  | 0.10 | 0.87 |
| scRNA      | HY1-L106                   | 1.92  | -0.09 | 0.10 | 0.87 |
| tRF3       | chr15.tRNA6-PseudoCTT-tRF3 | 2.01  | -0.08 | 0.10 | 0.87 |
| mir-5p     | hsa-miR-30b-5p             | 2.47  | 0.06  | 0.10 | 0.87 |
| rRNA       | 5S-L1067                   | 2.57  | 0.05  | 0.10 | 0.87 |
| rRNA       | LSU-rRNA_Hsa-L389          | 10.71 | 0.05  | 0.10 | 0.87 |
| snoRNA     | U59B                       | 7.06  | -0.06 | 0.11 | 0.87 |
| rRNA       | 5S-L1179                   | 1.46  | 0.08  | 0.11 | 0.87 |
| rRNA       | LSU-rRNA_Hsa-L31           | 7.70  | -0.05 | 0.11 | 0.87 |
| tRNA       | chr6.tRNA15-TyrGTA         | 5.52  | 0.05  | 0.11 | 0.88 |
| snoRNA     | ACA66                      | 2.24  | 0.07  | 0.11 | 0.88 |
| mir-5p3pno | hsa-miR-942                | 3.31  | 0.05  | 0.11 | 0.88 |
| mir-5p     | hsa-miR-6723-5p            | 4.58  | -0.05 | 0.11 | 0.88 |
| mir-3p     | hsa-miR-27a-3p             | 10.82 | -0.03 | 0.11 | 0.88 |
| mir-5p     | hsa-miR-3605-5p            | 2.60  | -0.07 | 0.11 | 0.88 |
| piRNA      | piR-41588                  | 1.60  | -0.08 | 0.11 | 0.88 |
| mir-5p     | hsa-miR-99a-5p             | 7.41  | -0.05 | 0.11 | 0.88 |
| tRNA       | chr16.tRNA4-ProAGG         | 2.50  | -0.06 | 0.11 | 0.88 |
| tRNA       | chr2.tRNA27-GlyCCC         | 8.80  | -0.04 | 0.11 | 0.89 |
| piRNA      | piR-31935                  | 4.57  | 0.04  | 0.12 | 0.89 |
| mir-5p     | hsa-miR-221-5p             | 3.85  | 0.04  | 0.12 | 0.89 |
| mir-3p     | hsa-miR-136-3p             | 2.62  | -0.07 | 0.12 | 0.89 |
| scRNA      | HY4-L38                    | 4.19  | -0.04 | 0.12 | 0.89 |
| tRF3       | chr17.tRNA1-Pseudo???-tRF3 | 2.09  | -0.06 | 0.12 | 0.89 |
| snoRNA     | HBII-180A                  | 2.03  | -0.10 | 0.12 | 0.89 |
| scRNA      | BC200-L19                  | 1.37  | -0.10 | 0.12 | 0.89 |
| mir-3p     | hsa-miR-1185-1-3p          | 2.25  | -0.08 | 0.12 | 0.89 |
| piRNA      | piR-38502                  | 3.33  | -0.06 | 0.12 | 0.89 |
| mir-3p     | hsa-miR-339-3p             | 2.88  | -0.05 | 0.12 | 0.89 |
| scRNA      | BC200-L88                  | 1.65  | -0.07 | 0.12 | 0.89 |
| tRNA       | chr1.tRNA2-GlyCCC          | 5.38  | -0.04 | 0.12 | 0.89 |
| rRNA       | 5S-L762                    | 4.86  | 0.03  | 0.12 | 0.89 |
| piRNA      | piR-35284                  | 8.07  | -0.05 | 0.12 | 0.89 |
| mir-3p     | hsa-miR-19a-3p             | 4.16  | -0.04 | 0.12 | 0.89 |
| tRNA       | chr14.tRNA8-CysGCA         | 4.27  | 0.08  | 0.13 | 0.89 |
| rRNA       | SSU-rRNA_Hsa-L25           | 4.08  | -0.04 | 0.13 | 0.89 |
| snoRNA     | U18B                       | 2.75  | -0.08 | 0.13 | 0.89 |

|            |                         |      |       |      |      |
|------------|-------------------------|------|-------|------|------|
| piRNA      | piR-61465               | 3.75 | 0.05  | 0.13 | 0.89 |
| piRNA      | piR-61646-L2            | 8.65 | -0.04 | 0.13 | 0.89 |
| mir-3p     | hsa-let-7i-3p           | 1.50 | -0.07 | 0.13 | 0.89 |
| snoRNA     | snR38B                  | 3.26 | -0.08 | 0.13 | 0.89 |
| rRNA       | 5S-L530                 | 5.17 | -0.08 | 0.13 | 0.89 |
| rRNA       | 5S-L101                 | 9.06 | 0.03  | 0.13 | 0.89 |
| tRNA       | chr17.tRNA20-MetCAT     | 1.87 | 0.08  | 0.13 | 0.89 |
| snoRNA     | U95                     | 6.95 | -0.04 | 0.13 | 0.89 |
| snoRNA     | HBII-420                | 4.25 | -0.06 | 0.14 | 0.89 |
| snRNA      | U17-L2                  | 2.12 | -0.08 | 0.14 | 0.89 |
| rRNA       | 5S-L877                 | 2.33 | 0.05  | 0.14 | 0.89 |
| tRF5       | chr6.tRNA78-LeuAAG-tRF5 | 1.31 | 0.09  | 0.14 | 0.89 |
| tRNA       | chr17.tRNA18-ArgCCT     | 1.72 | 0.06  | 0.14 | 0.89 |
| snoRNA     | ACA8                    | 2.21 | 0.07  | 0.14 | 0.89 |
| mir-5p3pno | hsa-miR-215             | 3.83 | -0.05 | 0.14 | 0.89 |
| rRNA       | 5S-L194                 | 2.89 | 0.04  | 0.14 | 0.89 |
| tRNA       | chr6.tRNA78-LeuAAG      | 2.00 | -0.10 | 0.14 | 0.89 |
| rRNA       | 5S-L233                 | 2.20 | 0.05  | 0.14 | 0.89 |
| scRNA      | HY1-L167                | 2.48 | -0.07 | 0.14 | 0.89 |
| mir-5p3pno | hsa-miR-375             | 6.00 | -0.04 | 0.14 | 0.89 |
| rRNA       | 5S-L515                 | 2.06 | -0.05 | 0.14 | 0.89 |
| snoRNA     | ACA46                   | 2.20 | 0.06  | 0.14 | 0.89 |
| tRNA       | chr17.tRNA41-SerCGA     | 2.38 | 0.09  | 0.15 | 0.89 |
| tRNA       | chr2.tRNA17-PseudoTTC   | 7.07 | -0.04 | 0.15 | 0.89 |
| snRNA      | U3-L4                   | 1.56 | 0.07  | 0.15 | 0.89 |
| tRNA       | chr12.tRNA11-PheGAA     | 1.77 | 0.09  | 0.15 | 0.89 |
| mir-3p     | hsa-miR-23a-3p          | 6.59 | -0.04 | 0.15 | 0.89 |
| scRNA      | HY3-L34                 | 3.61 | -0.06 | 0.15 | 0.89 |
| mir-5p     | hsa-miR-183-5p          | 7.53 | 0.03  | 0.15 | 0.89 |
| snoRNA     | HBI-61                  | 3.49 | 0.08  | 0.15 | 0.89 |
| mir-5p     | hsa-miR-142-5p          | 5.73 | -0.04 | 0.15 | 0.89 |
| snoRNA     | HBII-85-3               | 2.57 | -0.10 | 0.15 | 0.89 |
| tRNA       | chr6.tRNA75-MetCAT      | 1.36 | -0.09 | 0.15 | 0.89 |
| mir-3p     | hsa-miR-139-3p          | 3.31 | -0.05 | 0.15 | 0.89 |
| tRNA       | chr16.tRNA32-LysCTT     | 2.11 | -0.05 | 0.15 | 0.89 |
| snRNA      | U1-L142                 | 4.24 | -0.07 | 0.15 | 0.89 |
| tRNA       | chr17.tRNA3-GlnCTG      | 6.70 | 0.03  | 0.15 | 0.89 |
| mir-5p     | hsa-miR-140-5p          | 4.19 | -0.05 | 0.15 | 0.89 |
| scRNA      | HY1-L175                | 2.06 | 0.07  | 0.16 | 0.89 |
| tRNA       | chr11.tRNA16-ValTAC     | 4.20 | -0.04 | 0.16 | 0.89 |
| tRNA       | chr2.tRNA14-TyrATA      | 3.30 | 0.05  | 0.16 | 0.89 |
| snoRNA     | U50                     | 5.82 | -0.04 | 0.16 | 0.89 |
| mir-5p     | hsa-miR-181a-5p-L2      | 8.55 | -0.02 | 0.16 | 0.89 |

|            |                           |       |       |      |      |
|------------|---------------------------|-------|-------|------|------|
| rRNA       | LSU-rRNA_Hsa-L162         | 2.42  | -0.05 | 0.16 | 0.89 |
| piRNA      | piR-60577-L3              | 7.08  | -0.03 | 0.16 | 0.89 |
| scRNA      | BC200-L139                | 3.27  | 0.04  | 0.16 | 0.89 |
| mir-5p     | hsa-miR-3679-5p           | 2.94  | 0.05  | 0.16 | 0.89 |
| piRNA      | piR-31638-L3              | 7.00  | -0.05 | 0.16 | 0.89 |
| rRNA       | LSU-rRNA_Hsa-L309         | 8.19  | -0.04 | 0.16 | 0.89 |
| mir-3p     | hsa-miR-582-3p            | 4.81  | -0.05 | 0.16 | 0.89 |
| rRNA       | LSU-rRNA_Hsa-L51          | 4.19  | -0.06 | 0.16 | 0.89 |
| mir-5p3pno | hsa-let-7c-L2             | 5.48  | 0.02  | 0.16 | 0.89 |
| rRNA       | LSU-rRNA_Hsa-L375         | 10.09 | -0.04 | 0.16 | 0.89 |
| snoRNA     | mgh18S-121                | 1.93  | -0.10 | 0.16 | 0.89 |
| rRNA       | 5S-L583                   | 2.68  | -0.10 | 0.17 | 0.89 |
| mir-5p3pno | hsa-miR-941               | 6.39  | -0.03 | 0.17 | 0.89 |
| snoRNA     | U20                       | 6.66  | -0.06 | 0.17 | 0.89 |
| mir-5p     | hsa-miR-654-5p            | 3.09  | -0.06 | 0.17 | 0.89 |
| piRNA      | piR-53129                 | 1.55  | 0.07  | 0.17 | 0.89 |
| scRNA      | HY1-L263                  | 2.72  | -0.04 | 0.17 | 0.89 |
| mir-3p     | hsa-miR-27b-3p            | 8.94  | -0.02 | 0.17 | 0.89 |
| mir-3p     | hsa-miR-374a-3p           | 3.84  | 0.03  | 0.17 | 0.89 |
| piRNA      | piR-37525                 | 1.54  | -0.08 | 0.17 | 0.89 |
| tRF3       | chr16.tRNA28-ProtGGG-tRF3 | 1.99  | 0.07  | 0.17 | 0.89 |
| tRNA       | chr18.tRNA4-LysCTT        | 6.31  | -0.04 | 0.17 | 0.89 |
| snoRNA     | U84                       | 2.09  | -0.08 | 0.17 | 0.89 |
| tRNA       | chr6.tRNA38-IleAAT        | 3.15  | 0.11  | 0.17 | 0.89 |
| snRNA      | U1-L43                    | 1.93  | 0.05  | 0.17 | 0.89 |
| scRNA      | HY4-L152                  | 7.32  | 0.03  | 0.17 | 0.89 |
| mir-5p3pno | hsa-miR-511-L2            | 3.90  | -0.05 | 0.17 | 0.89 |
| mir-5p     | hsa-miR-146a-5p           | 9.39  | -0.03 | 0.17 | 0.89 |
| scRNA      | HY4-L89                   | 8.76  | -0.03 | 0.17 | 0.89 |
| scRNA      | HY1-L276                  | 3.15  | 0.04  | 0.17 | 0.89 |
| mir-5p     | hsa-miR-125a-5p           | 4.98  | -0.04 | 0.18 | 0.89 |
| scRNA      | BC200-L13                 | 2.84  | 0.06  | 0.18 | 0.89 |
| snoRNA     | U56                       | 2.63  | -0.07 | 0.18 | 0.89 |
| mir-5p     | hsa-let-7e-5p             | 5.52  | -0.03 | 0.18 | 0.89 |
| mir-5p3pno | hsa-miR-326               | 1.98  | 0.05  | 0.18 | 0.89 |
| tRNA       | chr1.tRNA96-PseudoCCT     | 8.20  | -0.04 | 0.18 | 0.89 |
| snoRNA     | U63                       | 5.92  | -0.05 | 0.18 | 0.89 |
| rRNA       | 5S-L815                   | 2.57  | 0.04  | 0.18 | 0.89 |
| piRNA      | piR-53659                 | 2.18  | 0.07  | 0.18 | 0.89 |
| mir-5p3pno | hsa-miR-889               | 2.82  | -0.07 | 0.18 | 0.89 |
| tRNA       | chr6.tRNA148-SerTGA       | 3.56  | 0.06  | 0.18 | 0.89 |
| mir-3p     | hsa-miR-148b-3p           | 8.62  | -0.03 | 0.19 | 0.89 |
| rRNA       | LSU-rRNA_Hsa-L339         | 2.35  | -0.08 | 0.19 | 0.89 |

|            |                          |      |       |      |      |
|------------|--------------------------|------|-------|------|------|
| rRNA       | 5S-L829                  | 2.65 | 0.05  | 0.19 | 0.89 |
| rRNA       | 5S-L930                  | 1.75 | 0.06  | 0.19 | 0.89 |
| mir-5p     | hsa-miR-126-5p           | 6.05 | -0.03 | 0.19 | 0.89 |
| mir-5p3pno | hsa-miR-210              | 2.15 | -0.07 | 0.19 | 0.89 |
| snoRNA     | HBII-85-10               | 1.77 | -0.06 | 0.19 | 0.89 |
| mir-5p3pno | hsa-miR-1244-L2          | 1.66 | 0.08  | 0.19 | 0.89 |
| scRNA      | BC200-L46                | 1.64 | -0.07 | 0.19 | 0.89 |
| rRNA       | 5S-L1234                 | 5.10 | 0.03  | 0.19 | 0.89 |
| tRNA       | chr6.tRNA98-LeuAAG       | 2.93 | 0.07  | 0.19 | 0.89 |
| snoRNA     | U83B                     | 2.68 | 0.05  | 0.19 | 0.89 |
| scRNA      | HY4-L50                  | 1.52 | -0.07 | 0.19 | 0.89 |
| rRNA       | LSU-rRNA_Hsa-L266        | 3.17 | -0.06 | 0.19 | 0.89 |
| tRF5       | chr14.tRNA8-CysGCA-tRF5  | 2.18 | -0.08 | 0.19 | 0.89 |
| piRNA      | piR-35952-L4             | 3.22 | -0.06 | 0.19 | 0.89 |
| mir-5p     | hsa-miR-382-5p           | 5.88 | -0.04 | 0.19 | 0.89 |
| mir-5p     | hsa-miR-193a-5p          | 5.17 | -0.03 | 0.19 | 0.89 |
| tRF5       | chr17.tRNA31-AsnGTT-tRF5 | 2.92 | 0.05  | 0.19 | 0.89 |
| scRNA      | HY4-L93                  | 3.97 | -0.03 | 0.19 | 0.89 |
| mir-5p     | hsa-miR-27b-5p           | 1.72 | -0.07 | 0.19 | 0.89 |
| snoRNA     | U27                      | 4.90 | -0.06 | 0.19 | 0.89 |
| piRNA      | piR-36323-L3             | 2.88 | -0.05 | 0.20 | 0.89 |
| tRNA       | chr1.tRNA43-GlyGCC       | 6.87 | -0.03 | 0.20 | 0.89 |
| tRNA       | chr7.tRNA7-CysGCA        | 7.06 | 0.04  | 0.20 | 0.89 |
| tRNA       | chr6.tRNA166-AlaAGC      | 1.77 | -0.08 | 0.20 | 0.89 |
| mir-5p3pno | hsa-miR-1278             | 1.56 | -0.07 | 0.20 | 0.89 |
| rRNA       | LSU-rRNA_Hsa-L331        | 1.53 | 0.06  | 0.20 | 0.89 |
| tRNA       | chr6.tRNA168-TrpCCA      | 2.05 | -0.07 | 0.20 | 0.89 |
| tRNA       | chr2.tRNA1-PseudoCCC     | 5.86 | -0.03 | 0.20 | 0.89 |
| rRNA       | SSU-rRNA_Hsa-L80         | 6.73 | -0.04 | 0.20 | 0.89 |
| snoRNA     | U60                      | 4.21 | -0.05 | 0.20 | 0.89 |
| mir-5p3pno | hsa-miR-548j             | 1.80 | -0.07 | 0.20 | 0.89 |
| scRNA      | HY1-L155                 | 2.69 | 0.04  | 0.20 | 0.89 |
| mir-5p     | hsa-miR-3173-5p          | 2.41 | -0.06 | 0.20 | 0.89 |
| mir-5p     | hsa-miR-181b-5p-L2       | 6.05 | -0.02 | 0.20 | 0.89 |
| mir-5p     | hsa-miR-411-5p           | 2.70 | -0.06 | 0.20 | 0.89 |
| piRNA      | piR-35548-L4             | 7.22 | -0.03 | 0.21 | 0.89 |
| rRNA       | 5S-L1144                 | 1.38 | -0.06 | 0.21 | 0.89 |
| rRNA       | 5S-L282                  | 1.46 | 0.06  | 0.21 | 0.89 |
| mir-3p     | hsa-miR-130b-3p          | 2.46 | -0.04 | 0.21 | 0.89 |
| snoRNA     | SNORD119                 | 5.61 | -0.05 | 0.21 | 0.89 |
| rRNA       | LSU-rRNA_Hsa-L385        | 8.75 | 0.03  | 0.21 | 0.89 |
| snRNA      | U4-L41                   | 2.29 | -0.06 | 0.21 | 0.89 |
| snoRNA     | U51                      | 2.71 | -0.07 | 0.21 | 0.89 |

|            |                             |       |       |      |      |
|------------|-----------------------------|-------|-------|------|------|
| snoRNA     | U62B                        | 3.71  | -0.06 | 0.21 | 0.89 |
| tRNA       | chr5.tRNA6-ValCAC           | 10.69 | -0.03 | 0.21 | 0.89 |
| mir-5p     | hsa-miR-454-5p              | 2.36  | -0.04 | 0.21 | 0.89 |
| tRF3       | chr17.tRNA33-PseudoTTG-tRF3 | 4.41  | -0.04 | 0.21 | 0.89 |
| scRNA      | BC200-L20                   | 1.94  | -0.07 | 0.21 | 0.89 |
| piRNA      | piR-31986                   | 8.37  | -0.04 | 0.21 | 0.89 |
| snRNA      | U2-L825                     | 3.19  | 0.05  | 0.21 | 0.89 |
| mir-5p     | hsa-miR-550a-5p-L2          | 3.39  | -0.04 | 0.21 | 0.89 |
| tRNA       | chr6.tRNA88-PseudoGAA       | 8.20  | 0.03  | 0.21 | 0.89 |
| mir-3p     | hsa-miR-378a-3p             | 8.57  | -0.02 | 0.21 | 0.89 |
| rRNA       | 5S-L471                     | 2.19  | 0.04  | 0.21 | 0.89 |
| snRNA      | U3-L78                      | 4.40  | -0.05 | 0.21 | 0.89 |
| mir-5p     | hsa-miR-642b-5p             | 1.56  | -0.06 | 0.22 | 0.89 |
| tRNA       | chr1.tRNA33-Pseudo???       | 3.32  | -0.04 | 0.22 | 0.89 |
| tRNA       | chr2.tRNA6-GluTTC           | 4.09  | -0.03 | 0.22 | 0.89 |
| tRF5       | chr3.tRNA5-LeuAAG-tRF5      | 3.59  | -0.03 | 0.22 | 0.89 |
| snRNA      | U1-L138                     | 3.38  | -0.06 | 0.22 | 0.89 |
| tRF5       | chr18.tRNA3-PseudoTCC-tRF5  | 1.35  | 0.08  | 0.22 | 0.89 |
| rRNA       | 5S-L1009                    | 2.50  | 0.04  | 0.22 | 0.89 |
| snoRNA     | U101                        | 5.22  | -0.04 | 0.22 | 0.89 |
| rRNA       | 5S-L107                     | 10.07 | -0.02 | 0.22 | 0.89 |
| scRNA      | HY3-L208                    | 1.34  | 0.06  | 0.22 | 0.89 |
| snRNA      | U3-L74                      | 2.45  | -0.07 | 0.22 | 0.89 |
| scRNA      | BC200-L91                   | 1.97  | -0.08 | 0.22 | 0.89 |
| tRF3       | chr3.tRNA10-PseudoCTC-tRF3  | 1.55  | 0.10  | 0.22 | 0.89 |
| rRNA       | LSU-rRNA_Hsa-L308           | 1.76  | -0.06 | 0.22 | 0.89 |
| tRNA       | chr6.tRNA11-IleAAT          | 8.31  | 0.04  | 0.22 | 0.89 |
| snoRNA     | mgh28S-2411                 | 6.56  | -0.04 | 0.22 | 0.89 |
| piRNA      | piR-49143                   | 11.96 | 0.02  | 0.22 | 0.89 |
| snoRNA     | HBII-202                    | 6.44  | -0.05 | 0.22 | 0.89 |
| tRNA       | chr1.tRNA5-GluTTC           | 5.89  | -0.04 | 0.22 | 0.89 |
| mir-5p3pno | hsa-miR-5096                | 2.21  | -0.06 | 0.22 | 0.89 |
| piRNA      | piR-45195-L2                | 1.33  | -0.07 | 0.23 | 0.89 |
| rRNA       | LSU-rRNA_Hsa-L67            | 3.16  | -0.06 | 0.23 | 0.89 |
| scRNA      | HY1-L409                    | 2.73  | -0.04 | 0.23 | 0.89 |
| piRNA      | piR-33065                   | 4.52  | -0.04 | 0.23 | 0.89 |
| piRNA      | piR-31447                   | 1.47  | -0.08 | 0.23 | 0.89 |
| snRNA      | U5-L108                     | 2.23  | 0.07  | 0.23 | 0.89 |
| tRNA       | chr6.tRNA28-IleAAT          | 3.35  | 0.05  | 0.23 | 0.89 |
| snRNA      | U1-L24                      | 2.67  | 0.04  | 0.23 | 0.89 |
| mir-5p3pno | hsa-miR-378e                | 1.49  | -0.06 | 0.23 | 0.89 |
| snRNA      | U6-L1308                    | 2.67  | -0.05 | 0.23 | 0.89 |
| mir-5p     | hsa-miR-30a-5p              | 7.14  | -0.02 | 0.23 | 0.89 |

|            |                         |       |       |      |      |
|------------|-------------------------|-------|-------|------|------|
| tRNA       | chr6.tRNA82-GlyGCC      | 5.27  | -0.04 | 0.23 | 0.89 |
| rRNA       | 5S-L105                 | 5.89  | 0.03  | 0.23 | 0.89 |
| piRNA      | piR-34041               | 4.17  | -0.04 | 0.23 | 0.89 |
| mir-3p     | hsa-miR-501-3p          | 4.83  | -0.03 | 0.23 | 0.89 |
| rRNA       | LSU-rRNA_Hsa-L378       | 2.46  | -0.07 | 0.23 | 0.89 |
| mir-5p     | hsa-miR-3158-5p-L2      | 1.49  | 0.07  | 0.23 | 0.89 |
| snoRNA     | U100                    | 1.54  | -0.07 | 0.23 | 0.89 |
| rRNA       | LSU-rRNA_Hsa-L188       | 1.82  | -0.05 | 0.24 | 0.89 |
| tRNA       | chr6.tRNA4-ArgTCG       | 2.79  | 0.06  | 0.24 | 0.89 |
| snoRNA     | HBII-234                | 2.39  | -0.06 | 0.24 | 0.89 |
| mir-5p3pno | hsa-miR-3928            | 1.51  | -0.07 | 0.24 | 0.89 |
| tRNA       | chr20.tRNA3-PseudoCAC   | 1.30  | -0.06 | 0.24 | 0.89 |
| tRNA       | chr2.tRNA23-GlnTTG      | 3.06  | -0.06 | 0.24 | 0.89 |
| scRNA      | BC200-L16               | 1.59  | 0.09  | 0.24 | 0.89 |
| tRNA       | chr1.tRNA99-ValCAC      | 8.58  | -0.03 | 0.24 | 0.89 |
| rRNA       | 5S-L995                 | 3.46  | -0.08 | 0.24 | 0.89 |
| mir-5p3pno | hsa-miR-3672            | 1.53  | -0.06 | 0.24 | 0.89 |
| scRNA      | HY4-L11                 | 1.48  | -0.07 | 0.24 | 0.89 |
| mir-3p     | hsa-miR-3913-3p         | 1.59  | 0.05  | 0.24 | 0.89 |
| piRNA      | piR-35468               | 4.14  | 0.04  | 0.24 | 0.89 |
| piRNA      | piR-33082               | 7.18  | -0.02 | 0.24 | 0.89 |
| scRNA      | HY1-L57                 | 2.78  | -0.04 | 0.24 | 0.89 |
| tRNA       | chr12.tRNA4-AspGTC      | 4.64  | -0.04 | 0.25 | 0.89 |
| mir-3p     | hsa-miR-10b-3p          | 1.70  | 0.07  | 0.25 | 0.89 |
| snoRNA     | U35A                    | 1.80  | -0.07 | 0.25 | 0.89 |
| mir-5p     | hsa-miR-148a-5p         | 4.17  | -0.03 | 0.25 | 0.89 |
| mir-5p     | hsa-miR-25-5p           | 2.07  | -0.06 | 0.25 | 0.89 |
| snoRNA     | U26                     | 8.56  | -0.04 | 0.25 | 0.89 |
| scRNA      | HY4-L134                | 2.51  | -0.05 | 0.25 | 0.89 |
| scRNA      | HY1-L393                | 1.73  | -0.05 | 0.25 | 0.89 |
| rRNA       | LSU-rRNA_Hsa-L140       | 4.43  | -0.03 | 0.25 | 0.89 |
| piRNA      | piR-31925               | 11.30 | -0.03 | 0.25 | 0.89 |
| rRNA       | LSU-rRNA_Hsa-L305       | 5.25  | -0.03 | 0.25 | 0.89 |
| snRNA      | U1-L8                   | 6.14  | 0.04  | 0.25 | 0.89 |
| snoRNA     | U66                     | 1.79  | -0.06 | 0.25 | 0.89 |
| scRNA      | BC200-L146              | 2.61  | -0.05 | 0.25 | 0.89 |
| rRNA       | LSU-rRNA_Hsa-L132       | 10.51 | 0.02  | 0.25 | 0.89 |
| piRNA      | piR-30112               | 2.68  | -0.05 | 0.25 | 0.89 |
| piRNA      | piR-31068-L3            | 3.12  | -0.05 | 0.25 | 0.89 |
| mir-3p     | hsa-miR-199b-3p         | 7.58  | -0.03 | 0.25 | 0.89 |
| tRF3       | chr12.tRNA7-AspGTC-tRF3 | 1.65  | -0.07 | 0.25 | 0.89 |
| rRNA       | LSU-rRNA_Hsa-L2         | 9.24  | 0.04  | 0.25 | 0.89 |
| mir-3p     | hsa-miR-221-3p          | 7.16  | -0.03 | 0.26 | 0.89 |

|            |                          |       |       |      |      |
|------------|--------------------------|-------|-------|------|------|
| rRNA       | 5S-L297                  | 1.59  | -0.07 | 0.26 | 0.89 |
| scRNA      | HY4-L59                  | 4.56  | -0.02 | 0.26 | 0.89 |
| scRNA      | HY1-L13                  | 2.51  | -0.04 | 0.26 | 0.89 |
| snRNA      | U2-L550                  | 2.12  | 0.06  | 0.26 | 0.89 |
| piRNA      | piR-60565-L4             | 12.26 | -0.02 | 0.26 | 0.89 |
| scRNA      | HY1-L261                 | 1.76  | -0.06 | 0.26 | 0.89 |
| tRNA       | chr6.tRNA77-GluCTC       | 4.25  | 0.03  | 0.26 | 0.89 |
| tRNA       | chr19.tRNA13-ValCAC      | 4.33  | -0.03 | 0.26 | 0.89 |
| snoRNA     | HBI-100                  | 4.44  | -0.03 | 0.26 | 0.89 |
| scRNA      | HY1-L26                  | 2.97  | -0.03 | 0.26 | 0.89 |
| mir-5p3pno | hsa-miR-548k             | 1.89  | -0.06 | 0.26 | 0.89 |
| snoRNA     | ACA61                    | 2.02  | 0.06  | 0.26 | 0.89 |
| rRNA       | 5S-L112                  | 10.83 | -0.02 | 0.26 | 0.89 |
| snRNA      | U1-L63                   | 2.53  | 0.04  | 0.26 | 0.89 |
| tRNA       | chr6.tRNA30-ProCGG       | 10.88 | -0.02 | 0.26 | 0.89 |
| mir-3p     | hsa-miR-181a-2-3p        | 4.18  | -0.03 | 0.26 | 0.89 |
| snoRNA     | HBII-85-8                | 2.21  | -0.09 | 0.26 | 0.89 |
| scRNA      | HY3-L159                 | 3.19  | 0.05  | 0.27 | 0.89 |
| snoRNA     | U96a                     | 3.47  | -0.05 | 0.27 | 0.89 |
| snoRNA     | mgU6-47                  | 1.72  | 0.07  | 0.27 | 0.89 |
| scRNA      | HY4-L162                 | 1.65  | -0.05 | 0.27 | 0.89 |
| scRNA      | HY3-L512                 | 2.05  | 0.07  | 0.27 | 0.90 |
| tRNA       | chr13.tRNA5-GluTTC       | 8.98  | -0.02 | 0.27 | 0.90 |
| tRF5       | chr1.tRNA130-ValCAC-tRF5 | 2.38  | 0.04  | 0.27 | 0.90 |
| scRNA      | BC200-L135               | 2.24  | -0.05 | 0.27 | 0.90 |
| piRNA      | piR-50811                | 3.42  | 0.03  | 0.27 | 0.90 |
| piRNA      | piR-32678-L3             | 10.98 | -0.02 | 0.27 | 0.90 |
| snRNA      | U6-L9                    | 4.67  | 0.03  | 0.28 | 0.90 |
| mir-3p     | hsa-miR-542-3p           | 3.59  | -0.04 | 0.28 | 0.90 |
| mir-5p     | hsa-miR-301a-5p          | 1.39  | -0.06 | 0.28 | 0.90 |
| scRNA      | HY3-L272                 | 1.38  | 0.05  | 0.28 | 0.90 |
| mir-5p     | hsa-miR-144-5p           | 5.62  | 0.03  | 0.28 | 0.90 |
| snoRNA     | U13-L162                 | 2.03  | 0.04  | 0.28 | 0.90 |
| rRNA       | SSU-rRNA_Hsa-L16         | 6.78  | -0.03 | 0.28 | 0.90 |
| mir-3p     | hsa-let-7a-3p-L2         | 3.02  | -0.04 | 0.28 | 0.90 |
| rRNA       | 5S-L363                  | 1.50  | 0.05  | 0.28 | 0.90 |
| tRF3       | chr18.tRNA1-GluCTC-tRF3  | 2.27  | 0.06  | 0.28 | 0.90 |
| mir-3p     | hsa-miR-381-3p           | 4.43  | -0.04 | 0.29 | 0.91 |
| mir-3p     | hsa-miR-30d-3p           | 1.67  | -0.05 | 0.29 | 0.91 |
| snRNA      | U4-L24                   | 1.61  | -0.05 | 0.29 | 0.91 |
| tRNA       | chr17.tRNA5-GlyGCC       | 7.52  | -0.02 | 0.29 | 0.91 |
| mir-3p     | hsa-miR-23b-3p           | 3.55  | -0.04 | 0.29 | 0.91 |
| tRF5       | chr20.tRNA6-LeuAAG-tRF5  | 3.01  | -0.03 | 0.29 | 0.91 |

|            |                          |       |       |      |      |
|------------|--------------------------|-------|-------|------|------|
| mir-5p     | hsa-miR-450b-5p          | 5.25  | -0.03 | 0.29 | 0.91 |
| mir-5p3pno | hsa-miR-1294             | 1.62  | 0.06  | 0.29 | 0.91 |
| snRNA      | U1-L39                   | 1.74  | -0.05 | 0.29 | 0.91 |
| rRNA       | LSU-rRNA_Hsa-L365        | 1.60  | -0.05 | 0.29 | 0.91 |
| scRNA      | HY1-L183                 | 2.44  | 0.03  | 0.29 | 0.91 |
| scRNA      | HY4-L151                 | 2.39  | 0.03  | 0.29 | 0.91 |
| tRNA       | chr15.tRNA4-ArgTCG       | 2.60  | 0.05  | 0.29 | 0.91 |
| piRNA      | piR-61174                | 1.23  | 0.06  | 0.29 | 0.91 |
| tRF5       | chr6.tRNA109-PheGAA-tRF5 | 2.26  | 0.05  | 0.29 | 0.91 |
| mir-5p     | hsa-miR-3613-5p          | 4.64  | -0.03 | 0.29 | 0.91 |
| mir-5p3pno | hsa-miR-4447             | 1.30  | -0.05 | 0.29 | 0.91 |
| rRNA       | LSU-rRNA_Hsa-L13         | 12.04 | -0.02 | 0.29 | 0.91 |
| tRNA       | chr17.tRNA36-ThrAGT      | 2.02  | 0.04  | 0.29 | 0.91 |
| piRNA      | piR-33382-L2             | 2.24  | -0.07 | 0.29 | 0.91 |
| scRNA      | HY1-L418                 | 1.64  | -0.05 | 0.30 | 0.91 |
| rRNA       | 5S-L935                  | 2.94  | -0.04 | 0.30 | 0.91 |
| mir-5p     | hsa-miR-340-5p           | 6.42  | -0.03 | 0.30 | 0.91 |
| mir-3p     | hsa-miR-200a-3p          | 2.22  | -0.04 | 0.30 | 0.91 |
| rRNA       | 5S-L1143                 | 1.64  | 0.05  | 0.30 | 0.91 |
| mir-5p3pno | hsa-miR-3615             | 7.34  | -0.02 | 0.30 | 0.91 |
| mir-5p3pno | hsa-miR-4485             | 4.29  | -0.04 | 0.30 | 0.91 |
| piRNA      | piR-44984-L3             | 2.62  | -0.03 | 0.30 | 0.91 |
| tRF3       | chr6.tRNA37-ValAAC-tRF3  | 12.93 | -0.03 | 0.30 | 0.91 |
| mir-3p     | hsa-miR-3177-3p          | 1.68  | -0.05 | 0.30 | 0.91 |
| snRNA      | U3-L75                   | 3.12  | -0.05 | 0.30 | 0.91 |
| scRNA      | HY1-L10                  | 1.55  | -0.05 | 0.30 | 0.91 |
| scRNA      | HY1-L259                 | 5.48  | -0.02 | 0.30 | 0.92 |
| piRNA      | piR-32678                | 6.09  | -0.02 | 0.31 | 0.92 |
| rRNA       | LSU-rRNA_Hsa-L42         | 1.88  | -0.05 | 0.31 | 0.92 |
| snoRNA     | HBII-13                  | 3.91  | -0.06 | 0.31 | 0.92 |
| tRNA       | chr19.tRNA2-GlyTCC       | 4.14  | -0.03 | 0.31 | 0.92 |
| piRNA      | piR-43995-L4             | 6.52  | -0.02 | 0.31 | 0.92 |
| tRNA       | chr2.tRNA3-AlaAGC        | 3.59  | -0.04 | 0.31 | 0.92 |
| scRNA      | HY1-L149                 | 3.78  | -0.03 | 0.31 | 0.92 |
| tRF3       | chr6.tRNA153-IleAAT-tRF3 | 2.68  | 0.06  | 0.31 | 0.92 |
| scRNA      | HY4-L132                 | 2.50  | 0.04  | 0.32 | 0.92 |
| snoRNA     | U33                      | 4.23  | -0.03 | 0.32 | 0.92 |
| tRF5       | chr9.tRNA6-AspGTC-tRF5   | 2.90  | 0.03  | 0.32 | 0.92 |
| scRNA      | HY1-L226                 | 3.29  | -0.03 | 0.32 | 0.92 |
| snoRNA     | SNORD126                 | 2.74  | -0.05 | 0.32 | 0.92 |
| mir-5p     | hsa-miR-100-5p           | 6.59  | -0.02 | 0.32 | 0.92 |
| rRNA       | LSU-rRNA_Hsa-L39         | 7.57  | -0.03 | 0.32 | 0.92 |
| scRNA      | BC200-L10                | 2.65  | 0.04  | 0.32 | 0.92 |



|        |                        |       |       |      |      |
|--------|------------------------|-------|-------|------|------|
| mir-5p | hsa-miR-99b-5p         | 6.89  | -0.02 | 0.32 | 0.92 |
| mir-5p | hsa-miR-146b-5p        | 7.71  | -0.02 | 0.32 | 0.92 |
| mir-3p | hsa-miR-4433-3p        | 2.78  | -0.04 | 0.32 | 0.92 |
| scRNA  | HY3-L140               | 2.64  | -0.04 | 0.32 | 0.92 |
| rRNA   | 5S-L627                | 1.59  | 0.05  | 0.32 | 0.92 |
| rRNA   | LSU-rRNA_Hsa-L366      | 4.93  | -0.03 | 0.32 | 0.92 |
| tRNA   | chr2.tRNA11-PseudoTTG  | 6.71  | -0.03 | 0.32 | 0.92 |
| scRNA  | HY4-L159               | 4.46  | -0.02 | 0.32 | 0.92 |
| mir-5p | hsa-miR-9-5p-L3        | 3.09  | 0.04  | 0.32 | 0.92 |
| mir-3p | hsa-miR-21-3p          | 1.95  | -0.05 | 0.33 | 0.93 |
| scRNA  | HY4-L81                | 3.17  | -0.03 | 0.33 | 0.93 |
| snRNA  | U2-L1001               | 2.25  | 0.04  | 0.33 | 0.93 |
| rRNA   | LSU-rRNA_Hsa-L64       | 1.52  | -0.05 | 0.33 | 0.93 |
| rRNA   | SSU-rRNA_Hsa-L33       | 12.79 | 0.02  | 0.33 | 0.93 |
| tRNA   | chr16.tRNA7-LysCTT     | 2.24  | 0.04  | 0.33 | 0.93 |
| scRNA  | HY4-L92                | 1.42  | 0.04  | 0.33 | 0.93 |
| rRNA   | LSU-rRNA_Hsa-L193      | 7.16  | -0.02 | 0.33 | 0.93 |
| snoRNA | HBII-180C              | 4.12  | -0.03 | 0.33 | 0.93 |
| tRNA   | chr6.tRNA143-LysTTT    | 5.55  | 0.03  | 0.33 | 0.93 |
| scRNA  | HY4-L34                | 1.71  | -0.04 | 0.33 | 0.93 |
| scRNA  | BC200-L49              | 4.36  | 0.03  | 0.33 | 0.93 |
| piRNA  | piR-60565-L9           | 1.87  | -0.04 | 0.34 | 0.93 |
| rRNA   | 5S-L986                | 1.69  | -0.04 | 0.34 | 0.93 |
| tRNA   | chr16.tRNA22-MetCAT    | 3.03  | -0.03 | 0.34 | 0.93 |
| snoRNA | U55                    | 5.84  | -0.04 | 0.34 | 0.93 |
| tRNA   | chr11.tRNA11-LysTTT    | 7.37  | 0.03  | 0.34 | 0.93 |
| tRF3   | chrX.tRNA2-LeuTAA-trF3 | 1.82  | -0.05 | 0.34 | 0.93 |
| scRNA  | BC200-L122             | 3.31  | 0.03  | 0.34 | 0.93 |
| piRNA  | piR-35982-L6           | 1.98  | -0.07 | 0.34 | 0.93 |
| rRNA   | 5S-L804                | 4.97  | 0.02  | 0.34 | 0.93 |
| mir-3p | hsa-miR-1273g-3p       | 5.83  | -0.02 | 0.34 | 0.93 |
| scRNA  | HY4-L32                | 3.65  | -0.03 | 0.34 | 0.93 |
| piRNA  | piR-57824              | 1.45  | -0.05 | 0.34 | 0.93 |
| rRNA   | 5S-L137                | 1.95  | 0.03  | 0.34 | 0.93 |
| snoRNA | U18A                   | 6.81  | -0.04 | 0.34 | 0.93 |
| scRNA  | HY1-L419               | 3.95  | -0.02 | 0.34 | 0.93 |
| tRNA   | chr14.tRNA2-LeuTAG     | 2.26  | 0.05  | 0.35 | 0.94 |
| mir-3p | hsa-miR-200c-3p        | 2.75  | 0.03  | 0.35 | 0.94 |
| snRNA  | U2-L302                | 4.05  | 0.03  | 0.35 | 0.94 |
| tRNA   | chr1.tRNA81-AspGTC     | 4.35  | -0.03 | 0.35 | 0.94 |
| mir-3p | hsa-miR-708-3p         | 1.52  | 0.05  | 0.35 | 0.94 |
| rRNA   | LSU-rRNA_Hsa-L203      | 5.91  | -0.02 | 0.35 | 0.94 |
| mir-3p | hsa-miR-22-3p          | 10.18 | -0.02 | 0.35 | 0.94 |

|            |                          |       |       |      |      |
|------------|--------------------------|-------|-------|------|------|
| mir-5p3pno | hsa-miR-433              | 3.46  | -0.04 | 0.36 | 0.94 |
| tRF5       | chr6.tRNA129-MetCAT-tRF5 | 2.00  | -0.04 | 0.36 | 0.94 |
| piRNA      | piR-43325-L2             | 2.34  | -0.04 | 0.36 | 0.94 |
| rRNA       | 5S-L126                  | 2.55  | 0.03  | 0.36 | 0.94 |
| mir-5p3pno | hsa-miR-494              | 1.75  | 0.05  | 0.36 | 0.94 |
| snRNA      | U3-L79                   | 3.27  | -0.04 | 0.36 | 0.94 |
| scRNA      | HY1-L321                 | 4.61  | -0.02 | 0.36 | 0.94 |
| tRNA       | chr14.tRNA19-TyrGTA      | 2.52  | 0.04  | 0.36 | 0.94 |
| piRNA      | piR-31925-L9             | 13.82 | -0.02 | 0.36 | 0.94 |
| rRNA       | LSU-rRNA_Hsa-L360        | 1.84  | -0.03 | 0.36 | 0.94 |
| snoRNA     | mgU6-77                  | 4.50  | -0.04 | 0.36 | 0.94 |
| scRNA      | HY1-L227                 | 1.30  | 0.05  | 0.36 | 0.94 |
| scRNA      | HY5-L7                   | 2.29  | 0.04  | 0.36 | 0.94 |
| mir-3p     | hsa-miR-671-3p           | 4.05  | 0.03  | 0.36 | 0.94 |
| tRNA       | chr11.tRNA12-ProTGG      | 8.16  | -0.02 | 0.36 | 0.94 |
| tRNA       | chr6.tRNA157-ValCAC      | 1.40  | -0.05 | 0.36 | 0.94 |
| rRNA       | 5S-L1114                 | 1.68  | 0.03  | 0.36 | 0.94 |
| rRNA       | LSU-rRNA_Hsa-L348        | 1.92  | -0.04 | 0.37 | 0.94 |
| rRNA       | LSU-rRNA_Hsa-L189        | 4.24  | 0.02  | 0.37 | 0.94 |
| snoRNA     | ACA47                    | 3.23  | -0.04 | 0.37 | 0.94 |
| mir-3p     | hsa-miR-409-3p           | 5.71  | -0.03 | 0.37 | 0.94 |
| tRNA       | chr6.tRNA153-IleAAT      | 1.68  | -0.05 | 0.37 | 0.94 |
| rRNA       | 5S-L957                  | 1.43  | 0.05  | 0.37 | 0.94 |
| rRNA       | LSU-rRNA_Hsa-L323        | 8.20  | -0.03 | 0.37 | 0.94 |
| snoRNA     | mgU2-19/30               | 3.71  | 0.02  | 0.37 | 0.94 |
| rRNA       | LSU-rRNA_Hsa-L166        | 5.43  | -0.06 | 0.37 | 0.94 |
| snRNA      | U14-L2                   | 1.79  | -0.06 | 0.37 | 0.94 |
| scRNA      | HY1-L352                 | 1.78  | -0.05 | 0.37 | 0.94 |
| snRNA      | U3-L205                  | 4.79  | -0.02 | 0.37 | 0.94 |
| mir-3p     | hsa-miR-30a-3p           | 5.31  | 0.02  | 0.37 | 0.94 |
| snRNA      | U2-L782                  | 2.99  | -0.04 | 0.37 | 0.94 |
| mir-5p3pno | hsa-miR-320a             | 11.48 | -0.01 | 0.37 | 0.94 |
| rRNA       | LSU-rRNA_Hsa-L275        | 5.54  | 0.03  | 0.37 | 0.94 |
| scRNA      | HY4-L154                 | 1.53  | 0.04  | 0.37 | 0.94 |
| mir-5p     | hsa-miR-106b-5p          | 3.53  | -0.03 | 0.38 | 0.94 |
| scRNA      | HY1-L28                  | 1.58  | 0.04  | 0.38 | 0.94 |
| snoRNA     | U81                      | 6.27  | -0.03 | 0.38 | 0.94 |
| piRNA      | piR-34535                | 5.56  | -0.03 | 0.38 | 0.94 |
| tRNA       | chr16.tRNA16-LeuAAG      | 3.29  | -0.03 | 0.38 | 0.94 |
| tRF5       | chr16.tRNA23-LysTTT-tRF5 | 3.56  | 0.04  | 0.38 | 0.94 |
| snRNA      | U2-L63                   | 2.16  | 0.03  | 0.38 | 0.94 |
| mir-5p     | hsa-let-7a-5p-L3         | 12.09 | 0.01  | 0.38 | 0.94 |
| piRNA      | piR-36444                | 2.53  | -0.04 | 0.38 | 0.94 |

|            |                             |      |       |      |      |
|------------|-----------------------------|------|-------|------|------|
| piRNA      | piR-33160                   | 1.68 | -0.04 | 0.38 | 0.94 |
| rRNA       | LSU-rRNA_Hsa-L109           | 1.47 | -0.04 | 0.38 | 0.94 |
| mir-5p     | hsa-miR-196b-5p             | 2.79 | 0.04  | 0.38 | 0.94 |
| mir-5p     | hsa-miR-744-5p              | 6.54 | -0.02 | 0.38 | 0.94 |
| tRNA       | chr6.tRNA131-GlnCTG         | 1.62 | 0.04  | 0.38 | 0.94 |
| rRNA       | LSU-rRNA_Hsa-L304           | 2.50 | -0.04 | 0.38 | 0.94 |
| tRF5       | chr16.tRNA8-ProTGG-tRF5     | 2.11 | 0.04  | 0.38 | 0.94 |
| scRNA      | BC200-L85                   | 1.95 | 0.04  | 0.38 | 0.94 |
| tRNA       | chr12.tRNA5-AspGTC          | 4.66 | 0.02  | 0.38 | 0.94 |
| rRNA       | 5S-L578                     | 2.37 | -0.04 | 0.38 | 0.94 |
| mir-5p     | hsa-miR-194-5p              | 4.46 | -0.02 | 0.39 | 0.94 |
| snRNA      | U2-L765                     | 2.07 | 0.05  | 0.39 | 0.94 |
| scRNA      | BC200-L73                   | 2.27 | -0.03 | 0.39 | 0.94 |
| piRNA      | piR-31115-L2                | 6.67 | -0.02 | 0.39 | 0.94 |
| snoRNA     | U83A                        | 3.52 | 0.04  | 0.39 | 0.94 |
| piRNA      | piR-44984-L6                | 2.42 | 0.03  | 0.39 | 0.94 |
| snoRNA     | U49A                        | 7.52 | -0.03 | 0.39 | 0.94 |
| mir-5p3pno | hsa-miR-410                 | 1.74 | -0.06 | 0.39 | 0.94 |
| scRNA      | HY1-L25                     | 1.88 | 0.04  | 0.39 | 0.94 |
| mir-5p     | hsa-miR-769-5p              | 3.02 | -0.03 | 0.39 | 0.94 |
| piRNA      | piR-36741                   | 6.41 | -0.02 | 0.39 | 0.94 |
| piRNA      | piR-52416-L2                | 2.28 | -0.04 | 0.39 | 0.94 |
| tRNA       | chr6.tRNA122-PseudoTGC      | 2.61 | 0.03  | 0.39 | 0.94 |
| scRNA      | BC200-L129                  | 2.19 | 0.04  | 0.39 | 0.94 |
| rRNA       | 5S-L1115                    | 1.30 | 0.05  | 0.39 | 0.94 |
| snoRNA     | U82                         | 5.05 | -0.03 | 0.39 | 0.94 |
| snoRNA     | HBII-210                    | 5.46 | -0.03 | 0.40 | 0.94 |
| tRF3       | chr3.tRNA6-CysGCA-tRF3      | 2.19 | 0.04  | 0.40 | 0.94 |
| piRNA      | piR-38600                   | 3.94 | -0.04 | 0.40 | 0.94 |
| scRNA      | BC200-L100                  | 1.69 | 0.06  | 0.40 | 0.94 |
| mir-3p     | hsa-miR-3613-3p             | 1.73 | -0.05 | 0.40 | 0.94 |
| piRNA      | piR-39361                   | 2.73 | -0.04 | 0.40 | 0.94 |
| mir-5p3pno | hsa-miR-2110                | 5.17 | -0.02 | 0.40 | 0.94 |
| tRF5       | chr1.tRNA109-PseudoGTT-tRF5 | 1.70 | -0.05 | 0.40 | 0.94 |
| scRNA      | HY4-L18                     | 1.43 | -0.04 | 0.40 | 0.94 |
| mir-5p3pno | hsa-miR-3909                | 1.71 | 0.04  | 0.40 | 0.94 |
| mir-5p     | hsa-miR-96-5p               | 2.19 | -0.04 | 0.40 | 0.94 |
| snoRNA     | U32A                        | 4.08 | -0.04 | 0.41 | 0.94 |
| rRNA       | 5S-L955                     | 1.52 | -0.04 | 0.41 | 0.94 |
| tRF5       | chr19.tRNA5-LysCTT-tRF5     | 4.33 | -0.03 | 0.41 | 0.94 |
| scRNA      | HY4-L47                     | 2.67 | 0.03  | 0.41 | 0.94 |
| mir-3p     | hsa-miR-576-3p              | 4.04 | -0.02 | 0.41 | 0.94 |
| rRNA       | LSU-rRNA_Hsa-L345           | 2.84 | -0.04 | 0.41 | 0.94 |

|            |                          |      |       |      |      |
|------------|--------------------------|------|-------|------|------|
| tRNA       | chr6.tRNA136-ValAAC      | 2.04 | -0.04 | 0.41 | 0.94 |
| mir-5p     | hsa-miR-27a-5p           | 4.98 | -0.02 | 0.41 | 0.94 |
| mir-3p     | hsa-miR-127-3p           | 5.07 | -0.03 | 0.41 | 0.94 |
| mir-5p     | hsa-miR-32-5p            | 3.62 | -0.02 | 0.41 | 0.94 |
| snoRNA     | U76                      | 2.36 | 0.05  | 0.41 | 0.94 |
| tRF3       | chr16.tRNA11-ProAGG-tRF3 | 1.79 | 0.04  | 0.41 | 0.94 |
| rRNA       | LSU-rRNA_Hsa-L278        | 2.72 | -0.02 | 0.41 | 0.94 |
| tRNA       | chr10.tRNA6-ValTAC       | 1.49 | -0.05 | 0.41 | 0.94 |
| mir-5p     | hsa-miR-425-5p           | 5.12 | -0.02 | 0.41 | 0.94 |
| scRNA      | HY3-L492                 | 1.45 | -0.04 | 0.42 | 0.94 |
| snRNA      | U5-L66                   | 6.99 | 0.02  | 0.42 | 0.94 |
| mir-5p     | hsa-miR-20a-5p           | 7.17 | -0.02 | 0.42 | 0.94 |
| scRNA      | HY3-L287                 | 1.40 | -0.04 | 0.42 | 0.94 |
| rRNA       | 5S-L247                  | 1.54 | 0.03  | 0.42 | 0.94 |
| scRNA      | HY1-L3                   | 3.10 | 0.02  | 0.42 | 0.94 |
| mir-5p     | hsa-miR-125b-5p-L2       | 3.27 | -0.03 | 0.42 | 0.94 |
| piRNA      | piR-41209-L2             | 3.72 | -0.03 | 0.42 | 0.94 |
| tRF5       | chr1.tRNA118-HisGTG-tRF5 | 1.83 | -0.04 | 0.42 | 0.94 |
| rRNA       | LSU-rRNA_Hsa-L214        | 2.13 | 0.06  | 0.42 | 0.94 |
| snoRNA     | HBII-382                 | 2.17 | 0.05  | 0.42 | 0.94 |
| piRNA      | piR-61648                | 2.28 | 0.03  | 0.42 | 0.94 |
| rRNA       | 5S-L95                   | 1.71 | -0.03 | 0.42 | 0.94 |
| rRNA       | LSU-rRNA_Hsa-L163        | 9.10 | -0.03 | 0.42 | 0.94 |
| rRNA       | LSU-rRNA_Hsa-L236        | 1.43 | -0.03 | 0.43 | 0.94 |
| piRNA      | piR-31987                | 6.33 | -0.02 | 0.43 | 0.94 |
| tRNA       | chr1.tRNA110-PseudoTTC   | 1.44 | -0.04 | 0.43 | 0.94 |
| scRNA      | BC200-L8                 | 2.74 | -0.03 | 0.43 | 0.94 |
| rRNA       | 5S-L621                  | 1.23 | 0.04  | 0.43 | 0.94 |
| scRNA      | HY1-L414                 | 1.30 | -0.04 | 0.43 | 0.94 |
| tRNA       | chr6.tRNA31-SerGCT       | 3.19 | -0.05 | 0.43 | 0.94 |
| tRNA       | chr17.tRNA14-ThrCGT      | 1.87 | -0.04 | 0.43 | 0.94 |
| rRNA       | LSU-rRNA_Hsa-L174        | 1.61 | -0.04 | 0.43 | 0.94 |
| tRNA       | chr6.tRNA133-ValCAC      | 2.93 | -0.02 | 0.43 | 0.94 |
| scRNA      | BC200-L27                | 2.97 | -0.03 | 0.43 | 0.94 |
| scRNA      | HY4-L100                 | 3.24 | -0.02 | 0.43 | 0.94 |
| tRNA       | chr17.tRNA17-SupTTA      | 2.90 | 0.03  | 0.43 | 0.94 |
| snoRNA     | ACA36                    | 1.90 | -0.05 | 0.43 | 0.94 |
| tRNA       | chr16.tRNA2-ArgCCT       | 3.09 | -0.03 | 0.43 | 0.94 |
| mir-5p3pno | hsa-miR-152              | 5.59 | -0.02 | 0.43 | 0.94 |
| scRNA      | HY4-L56                  | 1.82 | -0.03 | 0.43 | 0.94 |
| scRNA      | HY1-L69                  | 4.11 | -0.02 | 0.43 | 0.94 |
| scRNA      | HY4-L103                 | 4.44 | 0.02  | 0.43 | 0.94 |
| scRNA      | HY1-L430                 | 1.34 | -0.04 | 0.43 | 0.94 |

|            |                     |       |       |      |      |
|------------|---------------------|-------|-------|------|------|
| tRNA       | chr1.tRNA85-ValCAC  | 3.44  | 0.03  | 0.44 | 0.94 |
| mir-5p     | hsa-let-7g-5p       | 11.06 | 0.02  | 0.44 | 0.94 |
| rRNA       | LSU-rRNA_Hsa-L53    | 2.22  | -0.03 | 0.44 | 0.94 |
| piRNA      | piR-32950           | 6.31  | 0.02  | 0.44 | 0.94 |
| snoRNA     | ACA45               | 6.69  | -0.01 | 0.44 | 0.94 |
| mir-3p     | hsa-miR-3529-3p     | 7.65  | 0.02  | 0.44 | 0.94 |
| piRNA      | piR-31115-L4        | 7.28  | 0.02  | 0.44 | 0.94 |
| rRNA       | 5S-L526             | 1.32  | 0.04  | 0.44 | 0.94 |
| rRNA       | LSU-rRNA_Hsa-L58    | 7.02  | -0.02 | 0.44 | 0.94 |
| rRNA       | LSU-rRNA_Hsa-L198   | 7.74  | -0.02 | 0.44 | 0.94 |
| scRNA      | BC200-L117          | 1.83  | 0.04  | 0.44 | 0.94 |
| mir-3p     | hsa-miR-200b-3p     | 1.87  | -0.04 | 0.44 | 0.94 |
| mir-3p     | hsa-miR-548o-3p-L2  | 3.14  | -0.03 | 0.44 | 0.94 |
| mir-5p3pno | hsa-miR-1301        | 4.06  | -0.02 | 0.44 | 0.94 |
| snoRNA     | U18C                | 1.82  | 0.05  | 0.45 | 0.94 |
| mir-5p     | hsa-miR-409-5p      | 1.55  | -0.05 | 0.45 | 0.94 |
| mir-5p     | hsa-miR-493-5p      | 4.61  | -0.03 | 0.45 | 0.94 |
| mir-3p     | hsa-miR-4446-3p     | 3.56  | -0.02 | 0.45 | 0.94 |
| tRNA       | chr7.tRNA21-CysGCA  | 1.68  | -0.03 | 0.45 | 0.94 |
| tRNA       | chr1.tRNA4-GlyCCC   | 5.56  | 0.02  | 0.45 | 0.94 |
| tRNA       | chr16.tRNA17-LeuCAG | 3.37  | -0.02 | 0.45 | 0.94 |
| snoRNA     | snR39B              | 5.72  | -0.02 | 0.45 | 0.94 |
| piRNA      | piR-36041           | 7.32  | 0.02  | 0.45 | 0.94 |
| rRNA       | LSU-rRNA_Hsa-L93    | 7.67  | -0.02 | 0.45 | 0.94 |
| snRNA      | U2-L1074            | 3.33  | 0.03  | 0.45 | 0.94 |
| snRNA      | U1-L7               | 6.15  | -0.02 | 0.45 | 0.94 |
| rRNA       | 5S-L356             | 5.32  | 0.02  | 0.45 | 0.94 |
| mir-3p     | hsa-miR-539-3p      | 1.61  | 0.05  | 0.45 | 0.94 |
| mir-5p     | hsa-miR-16-5p-L2    | 8.44  | -0.02 | 0.45 | 0.94 |
| mir-5p     | hsa-miR-92b-5p      | 2.28  | 0.03  | 0.45 | 0.94 |
| tRNA       | chr5.tRNA4-ValAAC   | 2.29  | -0.03 | 0.45 | 0.94 |
| rRNA       | LSU-rRNA_Hsa-L84    | 2.85  | -0.03 | 0.46 | 0.94 |
| snoRNA     | ACA9                | 1.70  | 0.05  | 0.46 | 0.94 |
| rRNA       | 5S-L573             | 3.03  | 0.02  | 0.46 | 0.94 |
| mir-3p     | hsa-miR-3158-3p     | 3.71  | 0.03  | 0.46 | 0.94 |
| snRNA      | U7-L52              | 6.85  | -0.02 | 0.46 | 0.94 |
| scRNA      | BC200-L12           | 1.72  | -0.05 | 0.46 | 0.94 |
| snRNA      | U1-L4               | 8.27  | 0.02  | 0.46 | 0.94 |
| tRNA       | chr6.tRNA172-SerTGA | 1.90  | -0.05 | 0.46 | 0.94 |
| mir-5p     | hsa-let-7f-5p-L2    | 6.10  | 0.01  | 0.46 | 0.94 |
| snRNA      | U6-L503             | 1.31  | 0.04  | 0.46 | 0.94 |
| rRNA       | SSU-rRNA_Hsa-L26    | 3.24  | -0.03 | 0.46 | 0.94 |
| rRNA       | LSU-rRNA_Hsa-L221   | 2.74  | -0.03 | 0.46 | 0.94 |

|            |                        |       |       |      |      |
|------------|------------------------|-------|-------|------|------|
| scRNA      | HY4-L20                | 3.35  | -0.02 | 0.46 | 0.94 |
| mir-3p     | hsa-miR-144-3p         | 5.77  | 0.02  | 0.46 | 0.94 |
| tRNA       | chr1.tRNA106-HisGTG    | 3.36  | 0.02  | 0.46 | 0.94 |
| piRNA      | piR-48772-L2           | 1.95  | -0.03 | 0.47 | 0.94 |
| mir-5p     | hsa-miR-30e-5p         | 8.13  | -0.01 | 0.47 | 0.94 |
| rRNA       | LSU-rRNA_Hsa-L159      | 2.56  | -0.02 | 0.47 | 0.94 |
| rRNA       | 5S-L1196               | 2.22  | -0.04 | 0.47 | 0.94 |
| tRNA       | chr12.tRNA6-TrpCCA     | 2.86  | -0.02 | 0.47 | 0.94 |
| scRNA      | HY1-L121               | 2.72  | -0.03 | 0.47 | 0.94 |
| piRNA      | piR-43771-L6           | 2.90  | -0.03 | 0.47 | 0.94 |
| snoRNA     | U97                    | 1.93  | -0.05 | 0.47 | 0.94 |
| rRNA       | SSU-rRNA_Hsa-L34       | 5.52  | -0.02 | 0.47 | 0.94 |
| piRNA      | piR-60565-L12          | 10.99 | -0.02 | 0.47 | 0.94 |
| scRNA      | HY4-L112               | 3.97  | -0.02 | 0.47 | 0.94 |
| rRNA       | LSU-rRNA_Hsa-L220      | 4.41  | -0.02 | 0.47 | 0.94 |
| piRNA      | piR-33082-L2           | 1.78  | -0.03 | 0.47 | 0.94 |
| tRNA       | chr2.tRNA25-PseudoCTC  | 8.69  | -0.01 | 0.47 | 0.94 |
| tRF3       | chr3.tRNA2-ValAAC-tRF3 | 4.15  | 0.03  | 0.47 | 0.94 |
| mir-5p3pno | hsa-miR-4488           | 1.35  | 0.04  | 0.47 | 0.94 |
| scRNA      | BC200-L151             | 2.08  | -0.03 | 0.47 | 0.94 |
| mir-3p     | hsa-miR-3591-3p        | 12.23 | -0.03 | 0.48 | 0.94 |
| snRNA      | U6-L1561               | 2.12  | 0.05  | 0.48 | 0.94 |
| tRNA       | chr17.tRNA13-GlyCCC    | 5.81  | -0.02 | 0.48 | 0.94 |
| snRNA      | U2-L887                | 6.32  | -0.02 | 0.48 | 0.94 |
| mir-3p     | hsa-miR-629-3p         | 1.42  | -0.04 | 0.48 | 0.94 |
| scRNA      | HY4-L6                 | 3.98  | 0.01  | 0.48 | 0.94 |
| mir-5p     | hsa-miR-139-5p         | 6.03  | -0.02 | 0.48 | 0.94 |
| mir-5p     | hsa-miR-503-5p         | 3.20  | 0.02  | 0.48 | 0.94 |
| rRNA       | 5S-L115                | 1.96  | 0.03  | 0.48 | 0.94 |
| snRNA      | U2-L388                | 3.41  | 0.02  | 0.48 | 0.94 |
| mir-3p     | hsa-miR-4732-3p        | 2.44  | -0.04 | 0.48 | 0.94 |
| rRNA       | LSU-rRNA_Hsa-L283      | 2.10  | -0.04 | 0.48 | 0.94 |
| snoRNA     | HBII-55                | 4.50  | -0.03 | 0.48 | 0.94 |
| tRNA       | chr17.tRNA23-ArgCCG    | 3.40  | 0.02  | 0.48 | 0.94 |
| rRNA       | LSU-rRNA_Hsa-L185      | 2.41  | 0.03  | 0.48 | 0.94 |
| piRNA      | piR-34804              | 4.98  | 0.02  | 0.49 | 0.94 |
| mir-5p     | hsa-miR-106a-5p        | 2.83  | 0.03  | 0.49 | 0.94 |
| mir-5p     | hsa-miR-589-5p         | 4.55  | 0.02  | 0.49 | 0.94 |
| mir-5p3pno | hsa-miR-95             | 2.72  | -0.02 | 0.49 | 0.94 |
| scRNA      | BC200-L156             | 2.60  | -0.02 | 0.49 | 0.94 |
| mir-3p     | hsa-miR-195-3p         | 1.91  | 0.03  | 0.49 | 0.94 |
| rRNA       | LSU-rRNA_Hsa-L295      | 3.46  | -0.02 | 0.49 | 0.94 |
| mir-5p     | hsa-miR-23a-5p         | 1.78  | 0.03  | 0.49 | 0.94 |

|            |                     |       |       |      |      |
|------------|---------------------|-------|-------|------|------|
| mir-5p3pno | hsa-miR-3138        | 1.71  | 0.04  | 0.49 | 0.94 |
| scRNA      | HY3-L84             | 6.39  | -0.02 | 0.49 | 0.94 |
| rRNA       | LSU-rRNA_Hsa-L161   | 1.84  | -0.03 | 0.49 | 0.94 |
| scRNA      | HY4-L77             | 2.15  | -0.02 | 0.49 | 0.94 |
| snoRNA     | U15B                | 2.19  | -0.04 | 0.49 | 0.94 |
| rRNA       | 5S-L1255            | 1.70  | -0.03 | 0.50 | 0.94 |
| mir-5p     | hsa-miR-369-5p      | 1.73  | 0.05  | 0.50 | 0.94 |
| mir-5p3pno | hsa-miR-4472-L2     | 1.83  | -0.03 | 0.50 | 0.94 |
| mir-5p     | hsa-miR-199b-5p     | 2.97  | -0.03 | 0.50 | 0.94 |
| snRNA      | U14-L3              | 1.49  | -0.04 | 0.50 | 0.94 |
| snRNA      | U2-L1058            | 6.70  | 0.03  | 0.50 | 0.94 |
| rRNA       | 5S-L500             | 1.78  | -0.03 | 0.50 | 0.94 |
| tRNA       | chr17.tRNA12-TrpCCA | 2.18  | 0.03  | 0.50 | 0.94 |
| rRNA       | 5S-L731             | 1.51  | -0.03 | 0.50 | 0.94 |
| mir-5p     | hsa-miR-30d-5p      | 10.84 | -0.01 | 0.50 | 0.94 |
| mir-5p     | hsa-miR-28-5p       | 5.11  | -0.02 | 0.50 | 0.95 |
| mir-3p     | hsa-miR-1307-3p     | 7.96  | -0.01 | 0.50 | 0.95 |
| snRNA      | U5-L2               | 6.33  | -0.01 | 0.50 | 0.95 |
| mir-3p     | hsa-miR-324-3p      | 1.81  | 0.03  | 0.50 | 0.95 |
| mir-5p     | hsa-miR-629-5p      | 7.76  | -0.01 | 0.50 | 0.95 |
| scRNA      | HY3-L62             | 1.84  | -0.05 | 0.50 | 0.95 |
| snoRNA     | U92                 | 2.16  | -0.02 | 0.50 | 0.95 |
| mir-5p     | hsa-miR-4746-5p     | 1.73  | -0.03 | 0.51 | 0.95 |
| mir-5p     | hsa-miR-193b-5p     | 2.08  | -0.03 | 0.51 | 0.95 |
| mir-3p     | hsa-miR-1306-3p     | 2.00  | -0.03 | 0.51 | 0.95 |
| scRNA      | HY1-L243            | 6.54  | -0.01 | 0.51 | 0.95 |
| snRNA      | U5-L67              | 7.03  | 0.02  | 0.51 | 0.95 |
| mir-3p     | hsa-miR-16-2-3p     | 7.97  | -0.02 | 0.51 | 0.95 |
| mir-5p3pno | hsa-miR-370         | 4.87  | -0.03 | 0.51 | 0.95 |
| tRNA       | chr6.tRNA73-ArgCCG  | 2.37  | 0.03  | 0.51 | 0.95 |
| tRNA       | chr14.tRNA3-ProTGG  | 3.97  | 0.02  | 0.51 | 0.95 |
| scRNA      | BC200-L167          | 1.58  | 0.03  | 0.51 | 0.95 |
| tRNA       | chr7.tRNA3-ArgCCT   | 5.38  | 0.01  | 0.51 | 0.95 |
| rRNA       | 5S-L983             | 1.77  | 0.03  | 0.51 | 0.95 |
| mir-3p     | hsa-miR-29c-3p      | 1.99  | 0.03  | 0.51 | 0.95 |
| mir-5p     | hsa-miR-145-5p      | 1.79  | -0.03 | 0.51 | 0.95 |
| tRNA       | chr7.tRNA8-CysGCA   | 1.87  | -0.03 | 0.51 | 0.95 |
| mir-3p     | hsa-miR-150-3p      | 2.88  | -0.03 | 0.51 | 0.95 |
| piRNA      | piR-52041           | 1.91  | -0.03 | 0.51 | 0.95 |
| snRNA      | U1-L33              | 2.56  | 0.02  | 0.52 | 0.95 |
| mir-5p3pno | hsa-miR-378g        | 2.04  | -0.03 | 0.52 | 0.95 |
| scRNA      | BC200-L101          | 1.85  | 0.04  | 0.52 | 0.95 |
| rRNA       | 5S-L1068            | 2.39  | 0.02  | 0.52 | 0.95 |

|            |                             |       |       |      |      |
|------------|-----------------------------|-------|-------|------|------|
| snoRNA     | HBII-316                    | 2.02  | -0.04 | 0.52 | 0.95 |
| mir-3p     | hsa-miR-374b-3p             | 2.49  | 0.03  | 0.52 | 0.95 |
| tRNA       | chr14.tRNA23-ProAGG         | 2.14  | -0.03 | 0.52 | 0.95 |
| mir-3p     | hsa-miR-4742-3p             | 1.43  | 0.04  | 0.52 | 0.95 |
| piRNA      | piR-44716                   | 4.74  | -0.04 | 0.52 | 0.95 |
| rRNA       | SSU-rRNA_Hsa-L72            | 14.26 | -0.01 | 0.52 | 0.95 |
| scRNA      | HY3-L203                    | 1.78  | -0.03 | 0.52 | 0.95 |
| snoRNA     | ACA36B                      | 3.83  | -0.02 | 0.52 | 0.95 |
| tRF5       | chr11.tRNA16-ValTAC-tRF5    | 1.57  | 0.04  | 0.52 | 0.95 |
| tRNA       | chr1.tRNA38-LeuCAG          | 3.68  | 0.02  | 0.52 | 0.95 |
| snoRNA     | ACA7                        | 2.30  | -0.04 | 0.53 | 0.95 |
| mir-5p     | hsa-miR-4787-5p             | 1.33  | -0.04 | 0.53 | 0.95 |
| snRNA      | U2-L128                     | 7.39  | 0.02  | 0.53 | 0.95 |
| snoRNA     | U16                         | 2.75  | 0.03  | 0.53 | 0.95 |
| scRNA      | BC200-L32                   | 2.06  | 0.03  | 0.53 | 0.95 |
| snoRNA     | U24                         | 2.09  | -0.03 | 0.53 | 0.95 |
| rRNA       | LSU-rRNA_Hsa-L252           | 2.99  | -0.02 | 0.53 | 0.95 |
| mir-3p     | hsa-miR-628-3p              | 3.76  | -0.02 | 0.53 | 0.95 |
| tRF5       | chr1.tRNA125-PseudoGTT-tRF5 | 1.49  | 0.03  | 0.53 | 0.95 |
| scRNA      | HY3-L196                    | 1.85  | -0.03 | 0.53 | 0.95 |
| piRNA      | piR-36412                   | 2.36  | -0.03 | 0.53 | 0.95 |
| mir-3p     | hsa-miR-125b-2-3p           | 1.53  | -0.04 | 0.53 | 0.95 |
| rRNA       | 5S-L1270                    | 1.27  | -0.03 | 0.53 | 0.95 |
| mir-5p     | hsa-miR-379-5p              | 5.35  | -0.02 | 0.53 | 0.95 |
| tRNA       | chr13.tRNA3-GluTTC          | 10.17 | -0.01 | 0.53 | 0.95 |
| mir-5p     | hsa-miR-1292-5p             | 1.70  | -0.03 | 0.54 | 0.95 |
| scRNA      | HY4-L110                    | 1.99  | 0.04  | 0.54 | 0.95 |
| tRNA       | chr6.tRNA130-GlnTTG         | 3.35  | -0.02 | 0.54 | 0.95 |
| tRF5       | chr17.tRNA25-SeCTCA-tRF5    | 2.25  | -0.02 | 0.54 | 0.95 |
| rRNA       | LSU-rRNA_Hsa-L298           | 3.46  | 0.02  | 0.54 | 0.95 |
| mir-5p3pno | hsa-miR-378c                | 5.35  | -0.01 | 0.54 | 0.95 |
| mir-3p     | hsa-miR-502-3p              | 2.26  | -0.02 | 0.54 | 0.96 |
| rRNA       | LSU-rRNA_Hsa-L341           | 1.93  | -0.03 | 0.55 | 0.96 |
| snRNA      | U5-L133                     | 2.25  | -0.02 | 0.55 | 0.96 |
| piRNA      | piR-41209                   | 2.58  | 0.02  | 0.55 | 0.96 |
| mir-3p     | hsa-miR-140-3p              | 9.02  | -0.01 | 0.55 | 0.96 |
| mir-5p3pno | hsa-miR-320c                | 4.43  | -0.01 | 0.55 | 0.96 |
| snoRNA     | HBII-99                     | 4.90  | -0.02 | 0.55 | 0.96 |
| mir-3p     | hsa-miR-142-3p              | 5.68  | -0.01 | 0.55 | 0.96 |
| mir-3p     | hsa-miR-625-3p              | 4.68  | 0.02  | 0.56 | 0.96 |
| scRNA      | HY1-L269                    | 1.87  | 0.02  | 0.56 | 0.96 |
| scRNA      | HY5-L8                      | 3.89  | -0.02 | 0.56 | 0.96 |
| mir-3p     | hsa-miR-323b-3p             | 3.62  | -0.02 | 0.56 | 0.96 |



|            |                          |       |       |      |      |
|------------|--------------------------|-------|-------|------|------|
| snoRNA     | HBII-142                 | 3.42  | -0.03 | 0.56 | 0.96 |
| piRNA      | piR-33468                | 1.61  | -0.03 | 0.56 | 0.96 |
| tRNA       | chr5.tRNA22-AspGTC       | 1.97  | 0.04  | 0.56 | 0.96 |
| rRNA       | 5S-L782                  | 3.63  | 0.01  | 0.56 | 0.96 |
| tRNA       | chr1.tRNA88-PseudoCCT    | 6.19  | -0.02 | 0.56 | 0.96 |
| tRF5       | chr6.tRNA130-GlnTTG-tRF5 | 1.89  | -0.03 | 0.56 | 0.96 |
| piRNA      | piR-61298                | 1.91  | 0.04  | 0.56 | 0.96 |
| snoRNA     | U83                      | 2.97  | 0.02  | 0.56 | 0.96 |
| piRNA      | piR-35413-L2             | 1.56  | -0.02 | 0.56 | 0.96 |
| scRNA      | HY4-L96                  | 3.68  | 0.01  | 0.56 | 0.96 |
| mir-5p     | hsa-miR-548ay-5p         | 2.18  | -0.03 | 0.56 | 0.97 |
| tRF3       | chr6.tRNA61-MetCAT-tRF3  | 2.23  | 0.03  | 0.56 | 0.97 |
| mir-5p3pno | hsa-miR-3168             | 2.09  | -0.03 | 0.57 | 0.97 |
| scRNA      | BC200-L149               | 1.76  | 0.03  | 0.57 | 0.97 |
| snRNA      | U1-L174                  | 1.76  | -0.02 | 0.57 | 0.97 |
| snoRNA     | U85                      | 3.06  | -0.02 | 0.57 | 0.97 |
| mir-5p     | hsa-let-7i-5p            | 12.19 | 0.01  | 0.57 | 0.97 |
| scRNA      | BC200-L114               | 2.21  | 0.02  | 0.57 | 0.97 |
| rRNA       | LSU-rRNA_Hsa-L367        | 7.90  | -0.01 | 0.57 | 0.97 |
| scRNA      | HY4-L68                  | 4.03  | 0.01  | 0.57 | 0.97 |
| mir-5p     | hsa-miR-330-5p           | 1.63  | -0.03 | 0.57 | 0.97 |
| snoRNA     | HBII-295                 | 3.05  | 0.03  | 0.57 | 0.97 |
| snoRNA     | U45C                     | 2.62  | -0.03 | 0.57 | 0.97 |
| scRNA      | HY1-L397                 | 3.27  | 0.02  | 0.58 | 0.97 |
| snoRNA     | U45B                     | 2.57  | -0.02 | 0.58 | 0.97 |
| mir-5p3pno | hsa-miR-206              | 2.36  | 0.03  | 0.58 | 0.97 |
| mir-5p     | hsa-miR-214-5p           | 1.57  | -0.03 | 0.58 | 0.97 |
| scRNA      | BC200-L4                 | 3.40  | 0.02  | 0.58 | 0.97 |
| snoRNA     | U106                     | 1.86  | -0.03 | 0.58 | 0.97 |
| mir-3p     | hsa-miR-146b-3p          | 2.42  | 0.02  | 0.58 | 0.97 |
| rRNA       | LSU-rRNA_Hsa-L257        | 4.58  | 0.02  | 0.58 | 0.97 |
| mir-5p     | hsa-miR-485-5p           | 4.20  | -0.02 | 0.58 | 0.97 |
| scRNA      | HY1-L192                 | 5.99  | -0.01 | 0.58 | 0.97 |
| rRNA       | LSU-rRNA_Hsa-L333        | 4.08  | -0.02 | 0.58 | 0.97 |
| mir-3p     | hsa-miR-197-3p           | 2.69  | -0.02 | 0.58 | 0.97 |
| rRNA       | SSU-rRNA_Hsa-L73         | 14.22 | 0.01  | 0.58 | 0.97 |
| tRNA       | chr1.tRNA16-HisGTG       | 11.64 | -0.01 | 0.58 | 0.97 |
| scRNA      | HY4-L114                 | 2.44  | 0.02  | 0.58 | 0.97 |
| mir-3p     | hsa-miR-423-3p           | 8.89  | -0.01 | 0.58 | 0.97 |
| mir-3p     | hsa-miR-125a-3p          | 3.83  | -0.02 | 0.58 | 0.97 |
| piRNA      | piR-31925-L8             | 7.36  | -0.02 | 0.59 | 0.97 |
| rRNA       | LSU-rRNA_Hsa-L388        | 10.79 | -0.01 | 0.59 | 0.97 |
| snoRNA     | HBII-336                 | 2.07  | 0.03  | 0.59 | 0.97 |

|        |                        |       |       |      |      |
|--------|------------------------|-------|-------|------|------|
| rRNA   | 5S-L317                | 1.26  | 0.03  | 0.59 | 0.97 |
| mir-5p | hsa-let-7b-5p          | 12.45 | 0.01  | 0.59 | 0.97 |
| tRNA   | chr17.tRNA15-CysGCA    | 6.11  | -0.01 | 0.59 | 0.97 |
| rRNA   | LSU-rRNA_Hsa-L43       | 1.53  | 0.02  | 0.59 | 0.97 |
| mir-3p | hsa-miR-4677-3p        | 1.78  | -0.03 | 0.59 | 0.97 |
| mir-5p | hsa-miR-3606-5p        | 2.63  | 0.04  | 0.59 | 0.97 |
| scRNA  | HY1-L111               | 1.94  | -0.02 | 0.59 | 0.97 |
| scRNA  | BC200-L154             | 1.41  | 0.03  | 0.59 | 0.97 |
| mir-3p | hsa-let-7f-2-3p        | 1.55  | -0.03 | 0.59 | 0.97 |
| rRNA   | 5S-L1152               | 1.59  | 0.02  | 0.59 | 0.97 |
| snoRNA | U8-L17                 | 2.67  | 0.02  | 0.59 | 0.97 |
| rRNA   | 5S-L990                | 3.08  | 0.01  | 0.59 | 0.97 |
| snoRNA | U45A                   | 4.15  | 0.02  | 0.59 | 0.97 |
| rRNA   | LSU-rRNA_Hsa-L102      | 3.17  | -0.02 | 0.59 | 0.97 |
| snoRNA | U38A                   | 4.22  | -0.02 | 0.59 | 0.97 |
| mir-5p | hsa-miR-26b-5p         | 8.15  | 0.01  | 0.60 | 0.97 |
| tRNA   | chr5.tRNA8-AlaTGC      | 3.15  | -0.03 | 0.60 | 0.97 |
| tRNA   | chr2.tRNA22-PseudoTTG  | 3.03  | -0.02 | 0.60 | 0.97 |
| snRNA  | U2-L285                | 2.96  | 0.02  | 0.60 | 0.97 |
| mir-5p | hsa-miR-224-5p         | 6.88  | 0.01  | 0.60 | 0.97 |
| scRNA  | BC200-L24              | 2.86  | 0.02  | 0.60 | 0.97 |
| scRNA  | HY4-L83                | 4.19  | -0.01 | 0.60 | 0.97 |
| rRNA   | LSU-rRNA_Hsa-L63       | 4.97  | -0.05 | 0.60 | 0.97 |
| snoRNA | U105                   | 2.35  | 0.03  | 0.60 | 0.97 |
| scRNA  | HY1-L324               | 1.92  | -0.02 | 0.60 | 0.97 |
| scRNA  | HY3-L177               | 1.55  | -0.03 | 0.60 | 0.97 |
| scRNA  | HY3-L382               | 1.28  | -0.03 | 0.60 | 0.97 |
| tRNA   | chr12.tRNA2-SerCGA     | 1.52  | -0.04 | 0.60 | 0.97 |
| snRNA  | U2-L240                | 3.38  | 0.02  | 0.60 | 0.97 |
| tRNA   | chr17.tRNA16-GlnTTG    | 2.36  | 0.02  | 0.61 | 0.97 |
| snoRNA | U22                    | 3.81  | -0.03 | 0.61 | 0.97 |
| mir-5p | hsa-miR-10a-5p         | 8.93  | -0.01 | 0.61 | 0.98 |
| snoRNA | U29                    | 5.29  | 0.02  | 0.61 | 0.98 |
| scRNA  | HY4-L71                | 5.97  | -0.01 | 0.61 | 0.98 |
| tRNA   | chr6.tRNA152-ValCAC    | 8.52  | -0.01 | 0.61 | 0.98 |
| tRNA   | chr16.tRNA13-PseudoCTT | 4.70  | 0.01  | 0.62 | 0.98 |
| tRNA   | chr3.tRNA10-PseudoCTC  | 7.60  | 0.01  | 0.62 | 0.98 |
| scRNA  | BC200-L23              | 3.06  | 0.02  | 0.62 | 0.98 |
| scRNA  | HY4-L116               | 3.88  | 0.01  | 0.62 | 0.98 |
| tRNA   | chr1.tRNA18-PseudoCCT  | 1.66  | 0.02  | 0.62 | 0.98 |
| scRNA  | HY1-L280               | 2.44  | 0.02  | 0.62 | 0.98 |
| mir-5p | hsa-miR-423-5p         | 3.96  | -0.01 | 0.63 | 0.98 |
| mir-5p | hsa-miR-1228-5p        | 2.00  | -0.03 | 0.63 | 0.98 |

|            |                             |       |       |      |      |
|------------|-----------------------------|-------|-------|------|------|
| tRNA       | chr1.tRNA39-GlyGCC          | 11.35 | -0.01 | 0.63 | 0.98 |
| tRF3       | chr14.tRNA14-GluTTC-tRF3    | 2.02  | 0.04  | 0.63 | 0.98 |
| piRNA      | piR-35548-L3                | 2.78  | -0.02 | 0.63 | 0.98 |
| mir-5p     | hsa-miR-20b-5p              | 3.49  | -0.02 | 0.63 | 0.98 |
| scRNA      | HY4-L136                    | 2.51  | 0.02  | 0.63 | 0.98 |
| mir-5p3pno | hsa-miR-328                 | 4.07  | 0.01  | 0.63 | 0.98 |
| snRNA      | U5-L22                      | 1.98  | 0.03  | 0.63 | 0.98 |
| scRNA      | BC200-L165                  | 1.54  | 0.03  | 0.63 | 0.98 |
| scRNA      | HY3-L432                    | 1.48  | 0.02  | 0.63 | 0.98 |
| rRNA       | 5S-L61                      | 2.67  | -0.02 | 0.63 | 0.98 |
| scRNA      | HY4-L42                     | 1.44  | -0.02 | 0.63 | 0.98 |
| mir-5p3pno | hsa-miR-103b-L2             | 3.90  | 0.02  | 0.63 | 0.98 |
| rRNA       | 5S-L746                     | 2.21  | 0.02  | 0.63 | 0.98 |
| tRNA       | chr15.tRNA2-LysCTT          | 6.59  | -0.01 | 0.63 | 0.98 |
| mir-5p     | hsa-let-7a-5p               | 2.02  | 0.03  | 0.63 | 0.98 |
| mir-5p     | hsa-miR-374a-5p             | 2.91  | -0.02 | 0.64 | 0.98 |
| tRNA       | chr16.tRNA18-GlyGCC         | 1.78  | -0.02 | 0.64 | 0.98 |
| snoRNA     | HBII-166                    | 3.05  | -0.03 | 0.64 | 0.98 |
| tRNA       | chr16.tRNA27-LeuTAG         | 2.11  | -0.02 | 0.64 | 0.98 |
| mir-3p     | hsa-miR-28-3p               | 7.13  | -0.01 | 0.64 | 0.98 |
| tRF5       | chr6.tRNA56-PheGAA-tRF5     | 1.38  | -0.03 | 0.64 | 0.98 |
| mir-5p     | hsa-miR-150-5p              | 5.10  | -0.02 | 0.64 | 0.98 |
| snoRNA     | ACA51                       | 2.15  | -0.02 | 0.65 | 0.98 |
| tRNA       | chr6.tRNA100-LeuCAA         | 3.49  | 0.01  | 0.65 | 0.98 |
| piRNA      | piR-35982-L11               | 1.95  | -0.04 | 0.65 | 0.98 |
| scRNA      | HY1-L279                    | 4.02  | 0.01  | 0.65 | 0.98 |
| mir-5p     | hsa-miR-151a-5p             | 6.40  | -0.01 | 0.65 | 0.98 |
| mir-5p     | hsa-miR-24-2-5p             | 4.12  | -0.01 | 0.65 | 0.98 |
| piRNA      | piR-36170                   | 2.57  | 0.03  | 0.65 | 0.98 |
| snoRNA     | U43                         | 4.95  | 0.02  | 0.65 | 0.98 |
| rRNA       | LSU-rRNA_Hsa-L403           | 9.95  | 0.01  | 0.65 | 0.98 |
| scRNA      | HY4-L160                    | 7.28  | 0.01  | 0.65 | 0.98 |
| snoRNA     | U3-4                        | 7.31  | -0.01 | 0.65 | 0.98 |
| scRNA      | HY4-L99                     | 1.47  | -0.02 | 0.66 | 0.98 |
| scRNA      | BC200-L148                  | 2.11  | 0.02  | 0.66 | 0.98 |
| piRNA      | piR-49145                   | 2.41  | 0.02  | 0.66 | 0.98 |
| rRNA       | 5S-L367                     | 1.90  | -0.02 | 0.66 | 0.98 |
| scRNA      | HY4-L12                     | 5.27  | -0.01 | 0.66 | 0.98 |
| scRNA      | HY4-L130                    | 14.43 | -0.01 | 0.66 | 0.98 |
| mir-3p     | hsa-miR-570-3p              | 1.85  | 0.02  | 0.66 | 0.98 |
| tRF5       | chr1.tRNA104-PseudoGTT-tRF5 | 2.69  | 0.02  | 0.66 | 0.98 |
| scRNA      | BC200-L72                   | 1.58  | 0.02  | 0.66 | 0.98 |
| mir-5p3pno | hsa-miR-760                 | 2.38  | 0.01  | 0.66 | 0.98 |

|            |                            |       |       |      |      |
|------------|----------------------------|-------|-------|------|------|
| mir-3p     | hsa-miR-181a-3p            | 2.62  | 0.02  | 0.66 | 0.98 |
| scRNA      | HY4-L147                   | 9.21  | -0.01 | 0.66 | 0.98 |
| rRNA       | LSU-rRNA_Hsa-L202          | 3.79  | 0.01  | 0.66 | 0.98 |
| mir-3p     | hsa-miR-3605-3p            | 2.12  | 0.02  | 0.66 | 0.98 |
| snoRNA     | ACA16                      | 2.80  | -0.02 | 0.66 | 0.98 |
| mir-3p     | hsa-miR-652-3p             | 3.92  | -0.01 | 0.66 | 0.98 |
| scRNA      | HY1-L300                   | 2.19  | -0.02 | 0.67 | 0.98 |
| tRF5       | chr4.tRNA3-CysGCA-tRF5     | 1.61  | 0.02  | 0.67 | 0.98 |
| mir-3p     | hsa-miR-330-3p             | 3.77  | -0.01 | 0.67 | 0.98 |
| snoRNA     | HBII-82B                   | 2.38  | -0.03 | 0.67 | 0.98 |
| mir-3p     | hsa-miR-10a-3p             | 1.82  | 0.02  | 0.67 | 0.98 |
| scRNA      | HY4-L127                   | 11.00 | -0.01 | 0.67 | 0.98 |
| scRNA      | HY4-L109                   | 2.11  | 0.01  | 0.67 | 0.98 |
| rRNA       | 5S-L1075                   | 3.11  | 0.01  | 0.67 | 0.98 |
| rRNA       | LSU-rRNA_Hsa-L143          | 5.07  | 0.01  | 0.67 | 0.98 |
| tRNA       | chr16.tRNA19-GlyGCC        | 1.88  | -0.03 | 0.67 | 0.98 |
| tRF3       | chr18.tRNA2-PseudoTCC-tRF3 | 3.09  | -0.02 | 0.67 | 0.98 |
| rRNA       | 5S-L558                    | 7.28  | 0.01  | 0.67 | 0.98 |
| mir-5p     | hsa-miR-3614-5p            | 1.91  | -0.02 | 0.68 | 0.98 |
| mir-3p     | hsa-miR-126-3p             | 11.12 | -0.01 | 0.68 | 0.98 |
| tRNA       | chr1.tRNA9-ArgTCT          | 2.50  | -0.01 | 0.68 | 0.98 |
| mir-5p3pno | hsa-miR-320d-L2            | 3.63  | -0.01 | 0.68 | 0.98 |
| mir-5p3pno | hsa-miR-1284               | 1.70  | 0.02  | 0.68 | 0.98 |
| tRNA       | chr12.tRNA10-AspGTC        | 4.59  | 0.02  | 0.68 | 0.98 |
| mir-3p     | hsa-miR-18a-3p             | 2.18  | -0.02 | 0.68 | 0.98 |
| tRF3       | chr7.tRNA26-PseudoTTG-tRF3 | 2.24  | 0.02  | 0.68 | 0.98 |
| mir-5p     | hsa-miR-21-5p              | 13.59 | -0.01 | 0.68 | 0.98 |
| scRNA      | BC200-L9                   | 2.83  | -0.01 | 0.68 | 0.98 |
| mir-3p     | hsa-miR-382-3p             | 2.29  | 0.02  | 0.68 | 0.98 |
| scRNA      | HY1-L435                   | 3.49  | -0.01 | 0.68 | 0.98 |
| scRNA      | HY1-L223                   | 6.19  | -0.01 | 0.68 | 0.98 |
| mir-3p     | hsa-miR-2355-3p            | 1.86  | -0.02 | 0.68 | 0.98 |
| rRNA       | SSU-rRNA_Hsa-L74           | 6.51  | -0.01 | 0.68 | 0.98 |
| mir-3p     | hsa-miR-2115-3p            | 1.61  | 0.02  | 0.68 | 0.98 |
| scRNA      | HY4-L107                   | 9.96  | -0.01 | 0.68 | 0.98 |
| tRF3       | chr20.tRNA4-PseudoTAA-tRF3 | 4.75  | 0.01  | 0.68 | 0.98 |
| mir-3p     | hsa-miR-425-3p             | 4.14  | 0.01  | 0.68 | 0.98 |
| snRNA      | U1-L38                     | 1.64  | 0.02  | 0.68 | 0.98 |
| scRNA      | HY1-L374                   | 8.15  | -0.01 | 0.69 | 0.98 |
| piRNA      | piR-37213                  | 1.60  | -0.02 | 0.69 | 0.98 |
| scRNA      | BC200-L29                  | 2.92  | -0.02 | 0.69 | 0.98 |
| piRNA      | piR-33151-L12              | 2.94  | 0.01  | 0.69 | 0.98 |
| snoRNA     | U59A                       | 6.70  | -0.02 | 0.69 | 0.98 |

|            |                          |       |       |      |      |
|------------|--------------------------|-------|-------|------|------|
| mir-3p     | hsa-miR-191-3p           | 1.89  | -0.02 | 0.69 | 0.98 |
| snRNA      | U2-L615                  | 13.00 | -0.02 | 0.69 | 0.98 |
| scRNA      | BC200-L128               | 2.65  | -0.02 | 0.69 | 0.98 |
| snoRNA     | U53                      | 2.70  | -0.02 | 0.69 | 0.98 |
| scRNA      | HY3-L525                 | 1.38  | -0.02 | 0.69 | 0.98 |
| scRNA      | HY4-L120                 | 9.92  | -0.01 | 0.69 | 0.98 |
| mir-3p     | hsa-miR-1285-3p          | 3.54  | 0.01  | 0.69 | 0.98 |
| tRNA       | chr17.tRNA2-LysTTT       | 3.04  | 0.02  | 0.69 | 0.98 |
| rRNA       | LSU-rRNA_Hsa-L346        | 1.67  | -0.02 | 0.69 | 0.98 |
| mir-5p3pno | hsa-miR-4326             | 1.51  | -0.03 | 0.69 | 0.98 |
| tRF5       | chr17.tRNA26-CysGCA-tRF5 | 5.39  | 0.01  | 0.69 | 0.98 |
| mir-3p     | hsa-miR-3184-3p          | 11.60 | -0.01 | 0.69 | 0.98 |
| snRNA      | U14-L5                   | 4.24  | -0.01 | 0.69 | 0.98 |
| scRNA      | HY1-L103                 | 2.46  | 0.02  | 0.70 | 0.98 |
| snoRNA     | ACA3-2                   | 2.59  | -0.02 | 0.70 | 0.98 |
| scRNA      | HY4-L69                  | 9.89  | -0.01 | 0.70 | 0.98 |
| rRNA       | 5S-L397                  | 1.55  | -0.02 | 0.70 | 0.98 |
| piRNA      | piR-58356                | 5.40  | 0.01  | 0.70 | 0.98 |
| mir-5p     | hsa-miR-532-5p           | 7.72  | 0.01  | 0.70 | 0.98 |
| snRNA      | U2-L75                   | 4.87  | -0.02 | 0.70 | 0.98 |
| piRNA      | piR-36742                | 5.15  | -0.01 | 0.70 | 0.98 |
| piRNA      | piR-33151-L4             | 4.06  | 0.01  | 0.70 | 0.98 |
| snRNA      | U2-L981                  | 4.06  | 0.02  | 0.70 | 0.98 |
| tRNA       | chr9.tRNA4-ArgTCT        | 1.63  | -0.02 | 0.70 | 0.98 |
| scRNA      | HY3-L359                 | 1.91  | -0.02 | 0.70 | 0.98 |
| scRNA      | BC200-L108               | 2.02  | 0.02  | 0.70 | 0.98 |
| mir-5p3pno | hsa-miR-4461             | 2.06  | -0.03 | 0.70 | 0.98 |
| rRNA       | SSU-rRNA_Hsa-L65         | 4.28  | 0.01  | 0.70 | 0.98 |
| mir-5p     | hsa-miR-199a-5p          | 6.35  | 0.01  | 0.70 | 0.98 |
| mir-5p3pno | hsa-miR-320e             | 1.85  | 0.02  | 0.70 | 0.98 |
| scRNA      | BC200-L159               | 1.51  | -0.02 | 0.70 | 0.98 |
| tRNA       | chr1.tRNA60-PseudoTAA    | 3.73  | 0.01  | 0.70 | 0.98 |
| mir-5p     | hsa-miR-660-5p           | 3.50  | -0.01 | 0.70 | 0.98 |
| tRF5       | chr8.tRNA12-TyrGTA-tRF5  | 2.21  | 0.02  | 0.70 | 0.98 |
| snoRNA     | U47                      | 3.87  | -0.02 | 0.70 | 0.98 |
| snRNA      | U4-L40                   | 2.99  | -0.02 | 0.70 | 0.98 |
| scRNA      | HY5                      | 1.57  | 0.02  | 0.71 | 0.98 |
| scRNA      | HY4                      | 10.16 | -0.01 | 0.71 | 0.98 |
| mir-5p     | hsa-miR-1304-5p          | 1.47  | -0.02 | 0.71 | 0.98 |
| mir-3p     | hsa-miR-25-3p            | 12.18 | -0.01 | 0.71 | 0.98 |
| tRNA       | chr6.tRNA74-LeuCAA       | 2.43  | 0.01  | 0.71 | 0.98 |
| scRNA      | HY3-L479                 | 2.10  | 0.02  | 0.71 | 0.98 |
| piRNA      | piR-36707                | 5.03  | 0.01  | 0.71 | 0.98 |

|            |                            |       |       |      |      |
|------------|----------------------------|-------|-------|------|------|
| scRNA      | BC200-L31                  | 1.42  | 0.02  | 0.71 | 0.98 |
| snRNA      | U2-L709                    | 3.25  | -0.02 | 0.71 | 0.98 |
| snRNA      | U2-L532                    | 3.08  | -0.02 | 0.71 | 0.98 |
| mir-3p     | hsa-miR-103a-3p-L2         | 3.33  | -0.01 | 0.71 | 0.98 |
| rRNA       | LSU-rRNA_Hsa-L60           | 12.44 | -0.01 | 0.71 | 0.98 |
| rRNA       | LSU-rRNA_Hsa-L19           | 2.10  | 0.02  | 0.71 | 0.98 |
| mir-3p     | hsa-miR-106b-3p            | 7.66  | -0.01 | 0.71 | 0.98 |
| scRNA      | HY1-L356                   | 4.04  | -0.01 | 0.71 | 0.98 |
| scRNA      | HY3-L190                   | 2.20  | 0.01  | 0.71 | 0.98 |
| rRNA       | 5S-L102                    | 7.36  | -0.01 | 0.71 | 0.98 |
| tRNA       | chr2.tRNA13-AlaCGC         | 6.52  | -0.01 | 0.71 | 0.98 |
| mir-5p     | hsa-miR-7-5p-L3            | 1.44  | 0.02  | 0.71 | 0.98 |
| mir-5p     | hsa-miR-98-5p              | 6.17  | 0.01  | 0.71 | 0.98 |
| tRF3       | chr10.tRNA5-PseudoCTG-tRF3 | 1.70  | 0.02  | 0.72 | 0.98 |
| tRNA       | chr6.tRNA36-ArgACG         | 1.39  | -0.02 | 0.72 | 0.98 |
| tRF3       | chr19.tRNA9-PseudoTTT-tRF3 | 1.65  | -0.02 | 0.72 | 0.98 |
| scRNA      | HY4-L10                    | 10.20 | -0.01 | 0.72 | 0.98 |
| mir-3p     | hsa-miR-26b-3p             | 2.34  | -0.02 | 0.72 | 0.98 |
| tRNA       | chr6.tRNA175-SerGCT        | 2.06  | -0.03 | 0.72 | 0.98 |
| snoRNA     | HBII-82                    | 2.14  | -0.03 | 0.72 | 0.98 |
| snoRNA     | HBII-429                   | 4.20  | -0.02 | 0.72 | 0.98 |
| snoRNA     | ACA34                      | 4.14  | -0.01 | 0.72 | 0.98 |
| mir-3p     | hsa-miR-574-3p             | 1.66  | -0.02 | 0.72 | 0.98 |
| scRNA      | HY1-L208                   | 3.29  | -0.01 | 0.72 | 0.98 |
| scRNA      | HY3-L279                   | 5.21  | 0.01  | 0.72 | 0.98 |
| mir-5p     | hsa-miR-23b-5p             | 1.51  | -0.02 | 0.72 | 0.98 |
| tRNA       | chr6.tRNA86-PseudoTAC      | 2.07  | -0.02 | 0.72 | 0.98 |
| scRNA      | HY4-L111                   | 9.50  | -0.01 | 0.72 | 0.98 |
| snoRNA     | ACA54                      | 1.59  | -0.02 | 0.72 | 0.98 |
| scRNA      | HY1-L78                    | 1.39  | 0.02  | 0.73 | 0.98 |
| scRNA      | HY3-L120                   | 2.34  | 0.01  | 0.73 | 0.98 |
| tRNA       | chr6.tRNA138-ArgACG        | 1.66  | 0.02  | 0.73 | 0.98 |
| rRNA       | LSU-rRNA_Hsa-L144          | 1.61  | 0.02  | 0.73 | 0.98 |
| scRNA      | HY1-L179                   | 6.39  | -0.01 | 0.73 | 0.98 |
| mir-5p3pno | hsa-miR-378f               | 1.69  | -0.01 | 0.73 | 0.98 |
| rRNA       | 5S-L357                    | 2.11  | -0.01 | 0.73 | 0.98 |
| scRNA      | HY4-L49                    | 1.27  | 0.02  | 0.73 | 0.98 |
| rRNA       | 5S-L803                    | 7.74  | 0.01  | 0.73 | 0.98 |
| scRNA      | HY1-L37                    | 6.31  | -0.01 | 0.73 | 0.98 |
| mir-3p     | hsa-miR-340-3p             | 4.29  | -0.01 | 0.73 | 0.98 |
| rRNA       | 5S-L1091                   | 1.37  | 0.02  | 0.73 | 0.98 |
| rRNA       | 5S-L99                     | 8.58  | -0.01 | 0.73 | 0.98 |
| mir-5p     | hsa-miR-4433-5p            | 5.15  | -0.01 | 0.73 | 0.98 |

|            |                          |       |       |      |      |
|------------|--------------------------|-------|-------|------|------|
| scRNA      | HY1-L434                 | 6.45  | -0.01 | 0.73 | 0.98 |
| rRNA       | 5S-L303                  | 2.33  | -0.02 | 0.74 | 0.98 |
| snRNA      | U2-L603                  | 6.16  | -0.01 | 0.74 | 0.98 |
| rRNA       | 5S-L136                  | 1.53  | 0.01  | 0.74 | 0.98 |
| scRNA      | HY4-L35                  | 7.15  | -0.01 | 0.74 | 0.98 |
| scRNA      | HY4-L129                 | 3.45  | -0.01 | 0.74 | 0.98 |
| piRNA      | piR-36741-L2             | 1.62  | -0.02 | 0.74 | 0.98 |
| piRNA      | piR-35469                | 1.70  | 0.01  | 0.74 | 0.98 |
| tRF3       | chr1.tRNA55-LysTTT-tRF3  | 2.49  | -0.01 | 0.74 | 0.98 |
| snRNA      | U5-L3                    | 2.02  | -0.01 | 0.74 | 0.98 |
| mir-5p3pno | hsa-miR-451a             | 12.70 | -0.01 | 0.74 | 0.98 |
| piRNA      | piR-51119                | 2.10  | -0.02 | 0.74 | 0.98 |
| scRNA      | HY3-L372                 | 2.47  | -0.01 | 0.74 | 0.98 |
| rRNA       | LSU-rRNA_Hsa-L230        | 3.37  | -0.01 | 0.74 | 0.98 |
| piRNA      | piR-43772-L2             | 6.19  | -0.01 | 0.75 | 0.98 |
| tRNA       | chr13.tRNA2-PseudoCTC    | 4.77  | -0.01 | 0.75 | 0.98 |
| tRNA       | chr16.tRNA25-GlyGCC      | 4.78  | 0.01  | 0.75 | 0.98 |
| rRNA       | LSU-rRNA_Hsa-L211        | 1.63  | -0.02 | 0.75 | 0.98 |
| rRNA       | 5S-L111                  | 10.31 | -0.01 | 0.75 | 0.98 |
| mir-5p3pno | hsa-miR-618              | 2.72  | -0.01 | 0.75 | 0.98 |
| tRNA       | chr17.tRNA10-GlyTCC      | 1.81  | -0.02 | 0.75 | 0.98 |
| rRNA       | LSU-rRNA_Hsa-L73         | 2.19  | -0.01 | 0.75 | 0.98 |
| tRF3       | chr17.tRNA13-GlyCCC-tRF3 | 5.22  | 0.01  | 0.75 | 0.98 |
| tRNA       | chr1.tRNA58-LeuCAA       | 3.40  | -0.01 | 0.75 | 0.98 |
| scRNA      | HY4-L146                 | 1.61  | 0.01  | 0.75 | 0.98 |
| tRNA       | chr6.tRNA105-AlaAGC      | 1.66  | 0.02  | 0.75 | 0.98 |
| scRNA      | HY4-L15                  | 7.92  | 0.00  | 0.76 | 0.98 |
| scRNA      | HY1-L184                 | 3.77  | -0.01 | 0.76 | 0.98 |
| snoRNA     | U99                      | 3.13  | -0.01 | 0.76 | 0.98 |
| scRNA      | HY3-L142                 | 1.70  | 0.02  | 0.76 | 0.98 |
| scRNA      | HY4-L150                 | 3.26  | -0.01 | 0.76 | 0.98 |
| mir-5p3pno | hsa-miR-1468             | 2.31  | -0.01 | 0.76 | 0.98 |
| scRNA      | HY1-L124                 | 1.84  | 0.01  | 0.76 | 0.98 |
| mir-5p     | hsa-miR-10b-5p           | 10.26 | 0.01  | 0.76 | 0.98 |
| tRNA       | chr16.tRNA29-ProAGG      | 2.96  | 0.01  | 0.76 | 0.98 |
| rRNA       | 5S-L1071                 | 1.54  | 0.01  | 0.76 | 0.98 |
| snoRNA     | ACA20                    | 2.30  | 0.01  | 0.76 | 0.98 |
| scRNA      | HY1-L191                 | 3.51  | 0.01  | 0.76 | 0.98 |
| scRNA      | BC200-L68                | 2.33  | 0.01  | 0.76 | 0.98 |
| scRNA      | HY1-L143                 | 2.32  | -0.01 | 0.77 | 0.99 |
| scRNA      | HY1-L389                 | 2.66  | -0.01 | 0.77 | 0.99 |
| mir-5p     | hsa-miR-26a-5p-L2        | 10.75 | 0.01  | 0.77 | 0.99 |
| mir-3p     | hsa-miR-500a-3p          | 3.32  | 0.01  | 0.77 | 0.99 |

|            |                             |       |       |      |      |
|------------|-----------------------------|-------|-------|------|------|
| mir-5p     | hsa-miR-122-5p              | 9.88  | -0.01 | 0.77 | 0.99 |
| scRNA      | HY1-L326                    | 1.43  | 0.01  | 0.77 | 0.99 |
| rRNA       | 5S-L819                     | 2.01  | -0.01 | 0.77 | 0.99 |
| scRNA      | HY4-L28                     | 6.48  | -0.01 | 0.77 | 0.99 |
| mir-5p     | hsa-miR-483-5p              | 4.02  | 0.01  | 0.77 | 0.99 |
| mir-3p     | hsa-miR-335-3p              | 3.66  | 0.01  | 0.77 | 0.99 |
| scRNA      | BC200-L140                  | 7.01  | 0.01  | 0.77 | 0.99 |
| snRNA      | U6-L440                     | 1.97  | -0.02 | 0.77 | 0.99 |
| snoRNA     | U58A                        | 5.02  | -0.01 | 0.77 | 0.99 |
| mir-5p     | hsa-miR-1255b-5p-L2         | 1.62  | 0.01  | 0.78 | 0.99 |
| mir-5p     | hsa-miR-4732-5p             | 3.27  | -0.01 | 0.78 | 0.99 |
| rRNA       | LSU-rRNA_Hsa-L247           | 1.53  | 0.01  | 0.78 | 0.99 |
| scRNA      | HY4-L17                     | 10.67 | 0.00  | 0.78 | 0.99 |
| piRNA      | piR-33650                   | 3.04  | -0.01 | 0.78 | 0.99 |
| piRNA      | piR-57516                   | 5.25  | 0.01  | 0.78 | 0.99 |
| tRNA       | chr1.tRNA54-LysTTT          | 8.24  | -0.01 | 0.78 | 0.99 |
| mir-3p     | hsa-miR-374c-3p             | 2.90  | 0.01  | 0.78 | 0.99 |
| tRF5       | chrX.tRNA1-PseudoTTG-tRF5   | 2.77  | -0.01 | 0.78 | 0.99 |
| scRNA      | HY5-L21                     | 11.03 | -0.01 | 0.78 | 0.99 |
| scRNA      | HY4-L54                     | 6.72  | 0.00  | 0.78 | 0.99 |
| tRF5       | chr1.tRNA132-PseudoCAC-tRF5 | 2.10  | -0.01 | 0.78 | 0.99 |
| mir-3p     | hsa-miR-30c-2-3p            | 1.38  | -0.02 | 0.78 | 0.99 |
| piRNA      | piR-32377                   | 6.91  | 0.01  | 0.79 | 0.99 |
| mir-3p     | hsa-miR-92a-3p              | 11.39 | -0.01 | 0.79 | 0.99 |
| mir-5p3pno | hsa-miR-1908                | 3.10  | -0.01 | 0.79 | 0.99 |
| scRNA      | HY4-L30                     | 3.53  | 0.01  | 0.79 | 0.99 |
| snoRNA     | U58C                        | 3.37  | -0.01 | 0.79 | 0.99 |
| rRNA       | 5S-L255                     | 2.65  | -0.01 | 0.79 | 0.99 |
| tRF3       | chr10.tRNA2-SerTGA-tRF3     | 2.00  | 0.01  | 0.79 | 0.99 |
| tRNA       | chr3.tRNA7-CysGCA           | 1.80  | 0.01  | 0.79 | 0.99 |
| tRF3       | chr6.tRNA36-ArgACG-tRF3     | 4.47  | -0.01 | 0.79 | 0.99 |
| scRNA      | HY1-L178                    | 4.26  | -0.01 | 0.79 | 0.99 |
| snoRNA     | U91                         | 2.24  | -0.02 | 0.79 | 0.99 |
| snRNA      | U2-L1061                    | 11.07 | 0.01  | 0.79 | 0.99 |
| scRNA      | HY1                         | 6.00  | -0.01 | 0.80 | 0.99 |
| scRNA      | HY4-L44                     | 1.59  | -0.01 | 0.80 | 0.99 |
| scRNA      | HY4-L72                     | 7.28  | 0.00  | 0.80 | 0.99 |
| scRNA      | HY3-L239                    | 1.81  | 0.01  | 0.80 | 0.99 |
| tRF3       | chr2.tRNA21-SerTGA-tRF3     | 2.33  | -0.01 | 0.80 | 0.99 |
| mir-5p3pno | hsa-miR-1-L2                | 4.82  | 0.01  | 0.80 | 0.99 |
| snRNA      | U2-L205                     | 1.72  | 0.01  | 0.80 | 0.99 |
| scRNA      | BC200-L155                  | 2.70  | 0.01  | 0.80 | 0.99 |
| mir-5p     | hsa-miR-17-5p               | 5.08  | -0.01 | 0.80 | 0.99 |



|            |                           |       |       |      |      |
|------------|---------------------------|-------|-------|------|------|
| rRNA       | 5S-L1217                  | 1.70  | -0.01 | 0.80 | 0.99 |
| scRNA      | HY4-L126                  | 3.61  | -0.01 | 0.80 | 0.99 |
| tRNA       | chr1.tRNA119-LysCTT       | 7.12  | -0.01 | 0.80 | 0.99 |
| mir-5p3pno | hsa-miR-1287              | 1.87  | 0.01  | 0.80 | 0.99 |
| snRNA      | U2-L386                   | 2.89  | 0.01  | 0.81 | 0.99 |
| rRNA       | 5S-L109                   | 9.56  | 0.00  | 0.81 | 0.99 |
| rRNA       | 5S-L676                   | 1.34  | 0.01  | 0.81 | 0.99 |
| mir-3p     | hsa-miR-361-3p            | 7.04  | -0.01 | 0.81 | 0.99 |
| mir-5p     | hsa-miR-452-5p            | 1.74  | -0.01 | 0.81 | 0.99 |
| scRNA      | HY4-L66                   | 7.15  | 0.00  | 0.81 | 0.99 |
| scRNA      | BC200-L7                  | 2.61  | -0.01 | 0.81 | 0.99 |
| scRNA      | HY1-L273                  | 1.90  | -0.01 | 0.81 | 0.99 |
| scRNA      | HY1-L342                  | 1.37  | -0.01 | 0.81 | 0.99 |
| rRNA       | 5S-L344                   | 2.37  | 0.01  | 0.81 | 0.99 |
| snoRNA     | HBII-135                  | 5.06  | -0.01 | 0.81 | 0.99 |
| rRNA       | LSU-rRNA_Hsa-L200         | 2.74  | -0.01 | 0.81 | 0.99 |
| snoRNA     | U44                       | 6.36  | -0.01 | 0.81 | 0.99 |
| mir-3p     | hsa-miR-363-3p            | 7.85  | 0.01  | 0.82 | 0.99 |
| piRNA      | piR-36499                 | 1.68  | 0.01  | 0.82 | 0.99 |
| scRNA      | BC200-L90                 | 2.60  | 0.01  | 0.82 | 0.99 |
| mir-3p     | hsa-miR-99b-3p            | 3.53  | -0.01 | 0.82 | 0.99 |
| scRNA      | HY1-L159                  | 4.34  | -0.01 | 0.82 | 0.99 |
| rRNA       | 5S-L946                   | 9.07  | 0.00  | 0.82 | 0.99 |
| mir-3p     | hsa-miR-222-3p            | 8.33  | 0.01  | 0.82 | 0.99 |
| mir-5p     | hsa-miR-15a-5p            | 3.78  | -0.01 | 0.82 | 0.99 |
| scRNA      | HY4-L21                   | 2.22  | -0.01 | 0.82 | 0.99 |
| scRNA      | HY4-L58                   | 3.81  | 0.01  | 0.82 | 0.99 |
| snoRNA     | U46                       | 4.48  | 0.01  | 0.82 | 0.99 |
| scRNA      | HY1-L391                  | 14.88 | 0.00  | 0.82 | 0.99 |
| snoRNA     | SNORD125                  | 1.68  | 0.01  | 0.82 | 0.99 |
| mir-3p     | hsa-miR-486-3p            | 10.93 | 0.01  | 0.82 | 0.99 |
| scRNA      | HY3-L199                  | 1.72  | -0.01 | 0.82 | 0.99 |
| scRNA      | BC200-L67                 | 4.18  | -0.01 | 0.82 | 0.99 |
| snoRNA     | U94                       | 3.12  | 0.01  | 0.82 | 0.99 |
| scRNA      | HY4-L16                   | 3.92  | 0.00  | 0.82 | 0.99 |
| snoRNA     | U58B                      | 4.91  | 0.01  | 0.83 | 0.99 |
| scRNA      | HY1-L439                  | 2.44  | -0.01 | 0.83 | 0.99 |
| scRNA      | HY4-L70                   | 9.07  | 0.00  | 0.83 | 0.99 |
| scRNA      | HY4-L97                   | 8.74  | 0.00  | 0.83 | 0.99 |
| tRF5       | chr3.tRNA9-PseudoTTG-tRF5 | 1.99  | -0.01 | 0.83 | 0.99 |
| scRNA      | HY3-L524                  | 1.56  | -0.01 | 0.83 | 0.99 |
| rRNA       | LSU-rRNA_Hsa-L18          | 5.98  | 0.01  | 0.83 | 0.99 |
| rRNA       | LSU-rRNA_Hsa-L147         | 2.70  | 0.01  | 0.83 | 0.99 |

|            |                         |       |       |      |      |
|------------|-------------------------|-------|-------|------|------|
| mir-5p     | hsa-miR-185-5p          | 8.24  | -0.01 | 0.83 | 0.99 |
| rRNA       | 5S-L100                 | 2.88  | -0.01 | 0.83 | 0.99 |
| scRNA      | HY5-L19                 | 2.11  | -0.01 | 0.84 | 0.99 |
| mir-5p3pno | hsa-miR-484             | 6.24  | -0.01 | 0.84 | 0.99 |
| tRNA       | chr11.tRNA13-PheGAA     | 3.60  | 0.01  | 0.84 | 0.99 |
| rRNA       | 5S-L1129                | 1.90  | 0.01  | 0.84 | 0.99 |
| piRNA      | piR-61647-L4            | 3.62  | 0.01  | 0.84 | 0.99 |
| snoRNA     | HBI-43                  | 3.60  | 0.01  | 0.84 | 0.99 |
| tRNA       | chr6.tRNA63-IleTAT      | 1.53  | 0.01  | 0.84 | 0.99 |
| snoRNA     | ACA21                   | 2.76  | -0.01 | 0.84 | 0.99 |
| scRNA      | BC200-L69               | 1.43  | -0.01 | 0.84 | 0.99 |
| scRNA      | HY1-L67                 | 6.00  | 0.00  | 0.84 | 0.99 |
| tRNA       | chr1.tRNA72-AspGTC      | 7.23  | 0.01  | 0.84 | 0.99 |
| scRNA      | BC200-L11               | 1.53  | 0.01  | 0.84 | 0.99 |
| mir-3p     | hsa-miR-17-3p           | 1.53  | -0.01 | 0.84 | 0.99 |
| mir-3p     | hsa-miR-92b-3p          | 4.74  | 0.00  | 0.84 | 0.99 |
| scRNA      | HY4-L43                 | 2.22  | 0.01  | 0.84 | 0.99 |
| mir-5p3pno | hsa-miR-1299            | 2.07  | -0.01 | 0.85 | 0.99 |
| scRNA      | BC200-L164              | 2.30  | 0.01  | 0.85 | 0.99 |
| scRNA      | BC200-L93               | 1.59  | -0.01 | 0.85 | 0.99 |
| tRNA       | chr6.tRNA128-GlyGCC     | 4.35  | 0.00  | 0.85 | 0.99 |
| snRNA      | U2-L166                 | 3.45  | -0.01 | 0.85 | 0.99 |
| snRNA      | U2-L537                 | 2.76  | 0.01  | 0.85 | 0.99 |
| snoRNA     | U49B                    | 1.62  | 0.00  | 0.85 | 0.99 |
| snoRNA     | U15A                    | 2.09  | -0.01 | 0.85 | 0.99 |
| rRNA       | LSU-rRNA_Hsa-L383       | 14.16 | 0.00  | 0.85 | 0.99 |
| piRNA      | piR-34536               | 5.56  | 0.01  | 0.85 | 0.99 |
| snoRNA     | E2                      | 2.14  | 0.01  | 0.85 | 0.99 |
| tRNA       | chr13.tRNA4-GluCTC      | 2.04  | 0.01  | 0.85 | 0.99 |
| scRNA      | HY1-L174                | 1.36  | 0.01  | 0.85 | 0.99 |
| rRNA       | 5S-L1178                | 1.51  | -0.01 | 0.85 | 0.99 |
| piRNA      | piR-61648-L7            | 4.08  | -0.01 | 0.85 | 0.99 |
| rRNA       | SSU-rRNA_Hsa-L30        | 11.12 | 0.00  | 0.85 | 0.99 |
| mir-3p     | hsa-miR-15b-3p          | 3.61  | -0.01 | 0.85 | 0.99 |
| tRF5       | chr1.tRNA90-ValCAC-tRF5 | 2.14  | 0.01  | 0.85 | 0.99 |
| snRNA      | U1-L47                  | 1.98  | -0.01 | 0.85 | 0.99 |
| rRNA       | 5S-L550                 | 2.32  | 0.01  | 0.85 | 0.99 |
| rRNA       | 5S-L254                 | 2.29  | -0.01 | 0.86 | 0.99 |
| mir-5p     | hsa-miR-505-5p          | 1.81  | -0.01 | 0.86 | 0.99 |
| rRNA       | LSU-rRNA_Hsa-L150       | 3.40  | 0.00  | 0.86 | 1.00 |
| scRNA      | BC200-L120              | 1.92  | 0.01  | 0.86 | 1.00 |
| tRNA       | chr14.tRNA12-PseudoTTT  | 1.56  | 0.01  | 0.86 | 1.00 |
| rRNA       | 5S-L758                 | 2.59  | 0.01  | 0.86 | 1.00 |

|            |                     |       |       |      |      |
|------------|---------------------|-------|-------|------|------|
| piRNA      | piR-43325-L7        | 3.82  | 0.01  | 0.86 | 1.00 |
| scRNA      | HY5-L11             | 5.18  | -0.01 | 0.86 | 1.00 |
| scRNA      | BC200-L43           | 3.28  | 0.01  | 0.86 | 1.00 |
| rRNA       | LSU-rRNA_Hsa-L4     | 8.09  | 0.00  | 0.87 | 1.00 |
| snoRNA     | U38B                | 2.95  | 0.01  | 0.87 | 1.00 |
| mir-5p3pno | hsa-miR-378d-L2     | 1.37  | 0.01  | 0.87 | 1.00 |
| rRNA       | SSU-rRNA_Hsa-L50    | 4.47  | 0.01  | 0.87 | 1.00 |
| mir-3p     | hsa-miR-499b-3p     | 3.26  | 0.00  | 0.87 | 1.00 |
| rRNA       | 5S-L586             | 2.14  | -0.01 | 0.87 | 1.00 |
| scRNA      | HY4-L87             | 9.96  | 0.00  | 0.87 | 1.00 |
| snoRNA     | U48                 | 5.72  | -0.01 | 0.87 | 1.00 |
| piRNA      | piR-35411-L4        | 2.53  | -0.01 | 0.87 | 1.00 |
| scRNA      | HY3-L35             | 2.20  | 0.01  | 0.87 | 1.00 |
| tRNA       | chr14.tRNA7-ArgACG  | 1.75  | -0.01 | 0.88 | 1.00 |
| tRNA       | chr6.tRNA6-ArgACG   | 2.65  | 0.01  | 0.88 | 1.00 |
| snRNA      | U1-L78              | 1.40  | -0.01 | 0.88 | 1.00 |
| tRNA       | chr6.tRNA84-GlnTTG  | 1.52  | -0.01 | 0.88 | 1.00 |
| mir-3p     | hsa-miR-151a-3p     | 11.62 | 0.00  | 0.88 | 1.00 |
| tRNA       | chr1.tRNA134-GluTTC | 7.45  | 0.00  | 0.88 | 1.00 |
| mir-3p     | hsa-miR-185-3p      | 2.98  | -0.01 | 0.88 | 1.00 |
| scRNA      | BC200-L95           | 3.20  | -0.01 | 0.88 | 1.00 |
| scRNA      | HY4-L98             | 9.97  | 0.00  | 0.88 | 1.00 |
| mir-5p     | hsa-miR-30c-5p      | 6.46  | 0.00  | 0.88 | 1.00 |
| snRNA      | U1-L11              | 3.90  | -0.01 | 0.88 | 1.00 |
| mir-3p     | hsa-miR-3150b-3p    | 1.47  | 0.01  | 0.88 | 1.00 |
| scRNA      | BC200-L166          | 2.95  | 0.01  | 0.88 | 1.00 |
| snRNA      | U2-L161             | 12.39 | 0.00  | 0.89 | 1.00 |
| scRNA      | HY3-L282            | 3.75  | 0.00  | 0.89 | 1.00 |
| snRNA      | U2-L405             | 3.55  | -0.01 | 0.89 | 1.00 |
| mir-3p     | hsa-miR-29b-3p      | 2.25  | -0.01 | 0.89 | 1.00 |
| mir-3p     | hsa-miR-369-3p      | 1.38  | 0.01  | 0.89 | 1.00 |
| piRNA      | piR-51810-L2        | 8.21  | 0.00  | 0.89 | 1.00 |
| piRNA      | piR-31638           | 1.74  | -0.01 | 0.89 | 1.00 |
| snoRNA     | ACA18               | 2.07  | 0.01  | 0.89 | 1.00 |
| scRNA      | HY4-L53             | 3.75  | 0.00  | 0.89 | 1.00 |
| mir-5p     | hsa-miR-130b-5p     | 4.40  | 0.00  | 0.89 | 1.00 |
| tRNA       | chr6.tRNA123-SerGCT | 2.23  | 0.00  | 0.89 | 1.00 |
| scRNA      | HY4-L142            | 3.10  | 0.00  | 0.90 | 1.00 |
| snoRNA     | U36A                | 1.72  | 0.01  | 0.90 | 1.00 |
| scRNA      | HY4-L135            | 18.67 | 0.00  | 0.90 | 1.00 |
| tRNA       | chr6.tRNA129-MetCAT | 5.33  | 0.00  | 0.90 | 1.00 |
| mir-5p     | hsa-miR-5010-5p     | 1.44  | 0.01  | 0.90 | 1.00 |
| scRNA      | HY3-L497            | 2.14  | -0.01 | 0.90 | 1.00 |

|            |                        |      |       |      |      |
|------------|------------------------|------|-------|------|------|
| scRNA      | HY4-L37                | 4.00 | 0.00  | 0.90 | 1.00 |
| tRNA       | chr14.tRNA16-TyrGTA    | 3.58 | 0.01  | 0.90 | 1.00 |
| tRNA       | chr16.tRNA10-LysCTT    | 4.96 | 0.00  | 0.90 | 1.00 |
| scRNA      | BC200-L36              | 2.68 | 0.00  | 0.90 | 1.00 |
| rRNA       | SSU-rRNA_Hsa-L3        | 1.28 | 0.01  | 0.90 | 1.00 |
| mir-5p3pno | hsa-miR-1246           | 5.82 | -0.01 | 0.90 | 1.00 |
| mir-5p     | hsa-miR-625-5p         | 2.07 | 0.01  | 0.90 | 1.00 |
| mir-5p3pno | hsa-miR-133a           | 1.55 | 0.01  | 0.90 | 1.00 |
| scRNA      | HY4-L52                | 2.37 | 0.00  | 0.90 | 1.00 |
| mir-5p     | hsa-miR-155-5p         | 4.35 | 0.00  | 0.90 | 1.00 |
| snoRNA     | U105B                  | 4.75 | 0.01  | 0.91 | 1.00 |
| mir-3p     | hsa-let-7b-3p          | 3.86 | 0.00  | 0.91 | 1.00 |
| tRNA       | chr6.tRNA14-TyrGTA     | 1.90 | -0.01 | 0.91 | 1.00 |
| scRNA      | HY5-L9                 | 1.40 | -0.01 | 0.91 | 1.00 |
| scRNA      | HY4-L14                | 8.83 | 0.00  | 0.91 | 1.00 |
| scRNA      | HY4-L3                 | 2.42 | 0.00  | 0.91 | 1.00 |
| scRNA      | HY1-L295               | 4.37 | 0.00  | 0.91 | 1.00 |
| snRNA      | U6-L1696               | 1.91 | 0.01  | 0.91 | 1.00 |
| snoRNA     | U30                    | 6.13 | 0.00  | 0.91 | 1.00 |
| tRNA       | chr6.tRNA66-AlaTGC     | 1.95 | 0.00  | 0.91 | 1.00 |
| mir-5p3pno | hsa-miR-103b           | 8.26 | 0.00  | 0.91 | 1.00 |
| rRNA       | LSU-rRNA_Hsa-L409      | 4.71 | 0.00  | 0.91 | 1.00 |
| mir-5p     | hsa-miR-3184-5p        | 7.99 | 0.00  | 0.91 | 1.00 |
| scRNA      | HY1-L304               | 3.88 | 0.00  | 0.91 | 1.00 |
| snRNA      | U2-L342                | 5.41 | 0.00  | 0.91 | 1.00 |
| tRNA       | chr1.tRNA64-GluTTC     | 7.89 | 0.00  | 0.91 | 1.00 |
| mir-5p3pno | hsa-miR-107            | 1.72 | 0.00  | 0.91 | 1.00 |
| tRNA       | chr1.tRNA117-GlyTCC    | 2.71 | 0.00  | 0.92 | 1.00 |
| tRNA       | chr14.tRNA4-ThrTGT     | 1.44 | 0.01  | 0.92 | 1.00 |
| scRNA      | HY4-L39                | 3.89 | 0.00  | 0.92 | 1.00 |
| scRNA      | HY3-L82                | 3.20 | 0.00  | 0.92 | 1.00 |
| tRNA       | chr1.tRNA102-PseudoTTC | 6.55 | 0.00  | 0.92 | 1.00 |
| scRNA      | HY1-L292               | 5.48 | 0.00  | 0.92 | 1.00 |
| scRNA      | HY1-L443               | 7.16 | 0.00  | 0.92 | 1.00 |
| scRNA      | HY1-L277               | 3.60 | 0.00  | 0.92 | 1.00 |
| mir-5p     | hsa-miR-4665-5p        | 1.60 | 0.01  | 0.92 | 1.00 |
| piRNA      | piR-33151-L8           | 4.43 | 0.00  | 0.92 | 1.00 |
| mir-5p     | hsa-miR-450a-5p        | 3.31 | 0.00  | 0.92 | 1.00 |
| snoRNA     | HBI-115                | 2.00 | 0.01  | 0.92 | 1.00 |
| tRNA       | chr1.tRNA128-LysCTT    | 3.24 | 0.00  | 0.93 | 1.00 |
| snRNA      | U1-L29                 | 2.02 | 0.00  | 0.93 | 1.00 |
| scRNA      | BC200-L147             | 2.25 | 0.01  | 0.93 | 1.00 |
| rRNA       | LSU-rRNA_Hsa-L124      | 2.33 | 0.00  | 0.93 | 1.00 |

|            |                     |       |      |      |      |
|------------|---------------------|-------|------|------|------|
| mir-5p     | hsa-miR-486-5p      | 13.44 | 0.00 | 0.93 | 1.00 |
| mir-5p3pno | hsa-miR-421         | 2.77  | 0.00 | 0.93 | 1.00 |
| rRNA       | 5S-L98              | 9.83  | 0.00 | 0.93 | 1.00 |
| piRNA      | piR-33382           | 8.69  | 0.00 | 0.93 | 1.00 |
| scRNA      | HY1-L100            | 8.91  | 0.00 | 0.93 | 1.00 |
| tRNA       | chr1.tRNA116-GluCTC | 3.79  | 0.00 | 0.93 | 1.00 |
| rRNA       | 5S-L103             | 3.03  | 0.00 | 0.93 | 1.00 |
| piRNA      | piR-47305           | 9.66  | 0.00 | 0.93 | 1.00 |
| rRNA       | LSU-rRNA_Hsa-L384   | 14.09 | 0.00 | 0.93 | 1.00 |
| mir-5p     | hsa-miR-186-5p      | 6.23  | 0.00 | 0.93 | 1.00 |
| mir-5p     | hsa-miR-93-5p       | 7.11  | 0.00 | 0.93 | 1.00 |
| mir-3p     | hsa-miR-101-3p      | 10.61 | 0.00 | 0.93 | 1.00 |
| scRNA      | HY4-L57             | 2.80  | 0.00 | 0.93 | 1.00 |
| scRNA      | BC200-L126          | 3.33  | 0.00 | 0.93 | 1.00 |
| rRNA       | LSU-rRNA_Hsa-L208   | 7.16  | 0.00 | 0.93 | 1.00 |
| piRNA      | piR-36716           | 2.87  | 0.00 | 0.93 | 1.00 |
| scRNA      | HY1-L247            | 1.49  | 0.00 | 0.93 | 1.00 |
| mir-5p     | hsa-miR-1307-5p     | 1.42  | 0.00 | 0.93 | 1.00 |
| rRNA       | 5S-L21              | 2.71  | 0.00 | 0.94 | 1.00 |
| piRNA      | piR-49144           | 7.05  | 0.00 | 0.94 | 1.00 |
| mir-3p     | hsa-miR-181c-3p     | 1.57  | 0.00 | 0.94 | 1.00 |
| rRNA       | LSU-rRNA_Hsa-L381   | 2.74  | 0.00 | 0.94 | 1.00 |
| piRNA      | piR-33151-L9        | 3.44  | 0.00 | 0.94 | 1.00 |
| mir-5p     | hsa-miR-550a-3-5p   | 1.55  | 0.00 | 0.94 | 1.00 |
| rRNA       | LSU-rRNA_Hsa-L350   | 10.47 | 0.00 | 0.94 | 1.00 |
| mir-5p     | hsa-miR-192-5p      | 8.24  | 0.00 | 0.94 | 1.00 |
| scRNA      | HY4-L122            | 7.82  | 0.00 | 0.94 | 1.00 |
| snoRNA     | ACA44               | 2.30  | 0.00 | 0.94 | 1.00 |
| rRNA       | 5S-L104             | 10.61 | 0.00 | 0.94 | 1.00 |
| scRNA      | HY3-L45             | 3.48  | 0.00 | 0.94 | 1.00 |
| rRNA       | LSU-rRNA_Hsa-L139   | 14.15 | 0.00 | 0.94 | 1.00 |
| scRNA      | HY4-L61             | 5.54  | 0.00 | 0.94 | 1.00 |
| snoRNA     | U57                 | 4.69  | 0.00 | 0.95 | 1.00 |
| mir-5p3pno | hsa-miR-1180        | 4.05  | 0.00 | 0.95 | 1.00 |
| rRNA       | 5S-L1262            | 1.38  | 0.00 | 0.95 | 1.00 |
| rRNA       | 5S-L191             | 4.70  | 0.00 | 0.95 | 1.00 |
| rRNA       | 5S-L113             | 10.34 | 0.00 | 0.95 | 1.00 |
| snoRNA     | ACA58               | 1.85  | 0.00 | 0.95 | 1.00 |
| snRNA      | U2-L218             | 1.62  | 0.00 | 0.95 | 1.00 |
| scRNA      | BC200-L62           | 2.72  | 0.00 | 0.95 | 1.00 |
| snoRNA     | U61                 | 5.55  | 0.00 | 0.95 | 1.00 |
| mir-5p     | hsa-miR-200c-5p     | 2.02  | 0.00 | 0.95 | 1.00 |
| scRNA      | HY4-L138            | 8.42  | 0.00 | 0.95 | 1.00 |

|        |                            |       |      |      |      |
|--------|----------------------------|-------|------|------|------|
| rRNA   | 5S-L78                     | 2.70  | 0.00 | 0.95 | 1.00 |
| mir-5p | hsa-miR-2115-5p            | 1.27  | 0.00 | 0.95 | 1.00 |
| rRNA   | LSU-rRNA_Hsa-L387          | 9.35  | 0.00 | 0.96 | 1.00 |
| piRNA  | piR-30890                  | 3.30  | 0.00 | 0.96 | 1.00 |
| scRNA  | HY4-L46                    | 9.09  | 0.00 | 0.96 | 1.00 |
| snoRNA | U64                        | 2.08  | 0.00 | 0.96 | 1.00 |
| mir-5p | hsa-miR-766-5p             | 1.81  | 0.00 | 0.96 | 1.00 |
| mir-5p | hsa-miR-877-5p             | 2.35  | 0.00 | 0.96 | 1.00 |
| scRNA  | BC200-L138                 | 4.89  | 0.00 | 0.96 | 1.00 |
| mir-3p | hsa-miR-30e-3p             | 8.45  | 0.00 | 0.96 | 1.00 |
| mir-5p | hsa-miR-342-5p             | 6.55  | 0.00 | 0.96 | 1.00 |
| snoRNA | U50B                       | 4.34  | 0.00 | 0.96 | 1.00 |
| tRF3   | chr14.tRNA10-IleAAT-tRF3   | 2.47  | 0.00 | 0.96 | 1.00 |
| tRNA   | chr1.tRNA52-ProCGG         | 2.13  | 0.00 | 0.96 | 1.00 |
| scRNA  | HY4-L102                   | 8.16  | 0.00 | 0.96 | 1.00 |
| tRNA   | chr16.tRNA33-PseudoAGG     | 3.64  | 0.00 | 0.96 | 1.00 |
| mir-5p | hsa-miR-191-5p             | 8.87  | 0.00 | 0.96 | 1.00 |
| tRNA   | chr6.tRNA87-GluCTC         | 15.82 | 0.00 | 0.97 | 1.00 |
| scRNA  | HY4-L41                    | 1.86  | 0.00 | 0.97 | 1.00 |
| rRNA   | SSU-rRNA_Hsa-L46           | 6.10  | 0.00 | 0.97 | 1.00 |
| piRNA  | piR-33468-L4               | 2.34  | 0.00 | 0.97 | 1.00 |
| snRNA  | U2-L481                    | 1.44  | 0.00 | 0.97 | 1.00 |
| scRNA  | HY3-L105                   | 3.97  | 0.00 | 0.97 | 1.00 |
| scRNA  | BC200-L60                  | 2.38  | 0.00 | 0.97 | 1.00 |
| rRNA   | 5S-L108                    | 11.53 | 0.00 | 0.97 | 1.00 |
| scRNA  | BC200-L54                  | 4.73  | 0.00 | 0.97 | 1.00 |
| mir-5p | hsa-miR-1234-5p            | 14.77 | 0.00 | 0.97 | 1.00 |
| scRNA  | BC200-L18                  | 3.08  | 0.00 | 0.97 | 1.00 |
| mir-5p | hsa-let-7d-5p              | 8.11  | 0.00 | 0.97 | 1.00 |
| rRNA   | 5S-L1070                   | 1.47  | 0.00 | 0.97 | 1.00 |
| scRNA  | HY1-L239                   | 4.37  | 0.00 | 0.97 | 1.00 |
| rRNA   | LSU-rRNA_Hsa-L212          | 3.25  | 0.00 | 0.97 | 1.00 |
| scRNA  | HY1-L212                   | 2.69  | 0.00 | 0.97 | 1.00 |
| tRF5   | chr5.tRNA22-AspGTC-tRF5    | 2.30  | 0.00 | 0.98 | 1.00 |
| piRNA  | piR-35952-L5               | 2.44  | 0.00 | 0.98 | 1.00 |
| scRNA  | HY1-L137                   | 4.44  | 0.00 | 0.98 | 1.00 |
| tRF5   | chr20.tRNA7-PseudoCTC-tRF5 | 1.40  | 0.00 | 0.98 | 1.00 |
| rRNA   | 5S-L97                     | 10.24 | 0.00 | 0.98 | 1.00 |
| scRNA  | BC200-L110                 | 1.47  | 0.00 | 0.98 | 1.00 |
| tRF3   | chr22.tRNA1-SeCTCA-tRF3    | 4.56  | 0.00 | 0.98 | 1.00 |
| tRNA   | chr2.tRNA2-TyrGTA          | 1.69  | 0.00 | 0.98 | 1.00 |
| scRNA  | HY3-L478                   | 8.12  | 0.00 | 0.98 | 1.00 |
| tRNA   | chr17.tRNA31-AsnGTT        | 2.61  | 0.00 | 0.98 | 1.00 |

|            |                            |       |      |      |      |
|------------|----------------------------|-------|------|------|------|
| scRNA      | HY4-L153                   | 8.62  | 0.00 | 0.98 | 1.00 |
| snoRNA     | U93                        | 1.72  | 0.00 | 0.98 | 1.00 |
| snRNA      | U7-L207                    | 2.19  | 0.00 | 0.98 | 1.00 |
| scRNA      | HY3-L518                   | 8.30  | 0.00 | 0.98 | 1.00 |
| mir-5p3pno | hsa-miR-598                | 1.77  | 0.00 | 0.98 | 1.00 |
| rRNA       | LSU-rRNA_Hsa-L29           | 2.54  | 0.00 | 0.98 | 1.00 |
| mir-5p3pno | hsa-miR-1290               | 2.05  | 0.00 | 0.99 | 1.00 |
| snRNA      | U2-L250                    | 12.48 | 0.00 | 0.99 | 1.00 |
| rRNA       | 5S-L389                    | 1.35  | 0.00 | 0.99 | 1.00 |
| tRF5       | chr1.tRNA98-ValCAC-tRF5    | 2.65  | 0.00 | 0.99 | 1.00 |
| rRNA       | 5S-L1014                   | 1.63  | 0.00 | 0.99 | 1.00 |
| tRF3       | chr16.tRNA31-PseudoTGG-tRF | 1.95  | 0.00 | 0.99 | 1.00 |
| snRNA      | U7-L212                    | 2.30  | 0.00 | 0.99 | 1.00 |
| scRNA      | BC200-L116                 | 2.42  | 0.00 | 0.99 | 1.00 |
| snRNA      | U13_-L44                   | 1.56  | 0.00 | 0.99 | 1.00 |
| mir-3p     | hsa-miR-548g-3p            | 2.14  | 0.00 | 0.99 | 1.00 |
| mir-5p     | hsa-miR-129-5p-L2          | 1.82  | 0.00 | 0.99 | 1.00 |
| scRNA      | HY4-L139                   | 10.83 | 0.00 | 0.99 | 1.00 |
| scRNA      | HY1-L260                   | 4.88  | 0.00 | 0.99 | 1.00 |
| snRNA      | U1-L71                     | 5.05  | 0.00 | 0.99 | 1.00 |
| scRNA      | BC200-L28                  | 2.06  | 0.00 | 0.99 | 1.00 |
| scRNA      | HY4-L149                   | 1.76  | 0.00 | 0.99 | 1.00 |
| tRNA       | chr6.tRNA83-LeuTAA         | 2.22  | 0.00 | 0.99 | 1.00 |
| scRNA      | HY1-L287                   | 6.16  | 0.00 | 0.99 | 1.00 |
| tRNA       | chr16.tRNA24-GlyGCC        | 15.82 | 0.00 | 1.00 | 1.00 |
| mir-5p     | hsa-miR-148b-5p            | 2.86  | 0.00 | 1.00 | 1.00 |
| rRNA       | 5S-L253                    | 3.20  | 0.00 | 1.00 | 1.00 |
| mir-5p3pno | hsa-miR-1250               | 1.50  | 0.00 | 1.00 | 1.00 |
| rRNA       | 5S-L997                    | 1.97  | 0.00 | 1.00 | 1.00 |
| tRNA       | chr22.tRNA1-SeCTCA         | 2.22  | 0.00 | 1.00 | 1.00 |

**Supplementary Table 10: RNA correlations with baseline TJC28**

| <i>RNA type</i> | <i>ID</i>                | <i>Average read count (log2 CPM)</i> | <i>Correlation coefficient</i> | <i>P-value</i> | <i>Adjusted P-value</i> |
|-----------------|--------------------------|--------------------------------------|--------------------------------|----------------|-------------------------|
| tRNA            | chr1.tRNA131-GlyCCC      | 7.00                                 | 0.14                           | 4.84E-09       | 7.19E-06                |
| snRNA           | U2-L166                  | 3.45                                 | 0.20                           | 4.04E-05       | 3.00E-02                |
| mir-3p          | hsa-miR-324-3p           | 1.81                                 | 0.10                           | 5.95E-04       | 0.30                    |
| mir-5p          | hsa-miR-345-5p           | 2.70                                 | -0.10                          | 1.09E-03       | 0.41                    |
| snRNA           | U3-L78                   | 4.40                                 | -0.09                          | 1.83E-03       | 0.42                    |
| snRNA           | U2-L481                  | 1.44                                 | 0.14                           | 2.07E-03       | 0.42                    |
| tRF5            | chr17.tRNA21-ArgCCT-tRF5 | 1.46                                 | 0.12                           | 2.39E-03       | 0.42                    |
| snoRNA          | U102                     | 7.38                                 | -0.08                          | 2.48E-03       | 0.42                    |
| snoRNA          | U52                      | 2.73                                 | -0.11                          | 2.56E-03       | 0.42                    |
| snRNA           | U2-L288                  | 2.57                                 | 0.07                           | 3.05E-03       | 0.45                    |
| mir-5p3pno      | hsa-miR-210              | 2.15                                 | -0.11                          | 3.72E-03       | 0.50                    |
| snoRNA          | U42A                     | 4.44                                 | -0.10                          | 4.89E-03       | 0.56                    |
| scRNA           | HY4-L50                  | 1.52                                 | -0.11                          | 5.06E-03       | 0.56                    |
| tRNA            | chr16.tRNA31-PseudoTGG   | 3.01                                 | 0.11                           | 5.30E-03       | 0.56                    |
| rRNA            | 5S-L1179                 | 1.46                                 | 0.10                           | 5.73E-03       | 0.57                    |
| rRNA            | LSU-rRNA_Hsa-L84         | 2.85                                 | 0.08                           | 6.80E-03       | 0.62                    |
| snoRNA          | U59B                     | 7.06                                 | -0.08                          | 7.14E-03       | 0.62                    |
| scRNA           | BC200-L161               | 1.53                                 | 0.12                           | 8.60E-03       | 0.66                    |
| snoRNA          | mgh285-2409              | 3.15                                 | -0.10                          | 9.19E-03       | 0.66                    |
| snRNA           | U7-L159                  | 1.62                                 | 0.12                           | 9.19E-03       | 0.66                    |
| snoRNA          | U15B                     | 2.19                                 | -0.10                          | 9.37E-03       | 0.66                    |
| snoRNA          | HBII-295                 | 3.05                                 | -0.11                          | 1.04E-02       | 0.67                    |
| snoRNA          | U27                      | 4.90                                 | -0.09                          | 1.05E-02       | 0.67                    |
| snoRNA          | HBII-239                 | 4.70                                 | -0.06                          | 1.08E-02       | 0.67                    |
| snoRNA          | HBII-276                 | 3.49                                 | -0.10                          | 1.20E-02       | 0.67                    |
| rRNA            | LSU-rRNA_Hsa-L41         | 1.50                                 | -0.13                          | 1.22E-02       | 0.67                    |
| snRNA           | U3-L4                    | 1.56                                 | 0.09                           | 1.27E-02       | 0.67                    |
| tRNA            | chr2.tRNA13-AlaCGC       | 6.52                                 | 0.05                           | 1.32E-02       | 0.67                    |
| mir-5p3pno      | hsa-miR-3609             | 2.87                                 | -0.10                          | 1.35E-02       | 0.67                    |
| snoRNA          | HBII-202                 | 6.44                                 | -0.08                          | 1.36E-02       | 0.67                    |
| tRNA            | chr16.tRNA27-LeuTAG      | 2.11                                 | 0.09                           | 1.44E-02       | 0.67                    |
| snoRNA          | ACA44                    | 2.30                                 | -0.12                          | 1.49E-02       | 0.67                    |
| rRNA            | LSU-rRNA_Hsa-L185        | 2.41                                 | 0.09                           | 1.49E-02       | 0.67                    |
| scRNA           | BC200-L134               | 1.43                                 | 0.10                           | 1.66E-02       | 0.71                    |
| tRF5            | chr16.tRNA8-ProTGG-tRF5  | 2.11                                 | 0.09                           | 1.68E-02       | 0.71                    |
| tRNA            | chr17.tRNA12-TrpCCA      | 2.18                                 | 0.07                           | 1.81E-02       | 0.75                    |
| rRNA            | LSU-rRNA_Hsa-L257        | 4.58                                 | 0.06                           | 2.00E-02       | 0.80                    |
| mir-3p          | hsa-miR-424-3p           | 4.70                                 | -0.05                          | 2.03E-02       | 0.80                    |
| mir-5p3pno      | hsa-miR-6073             | 1.46                                 | 0.08                           | 2.41E-02       | 0.85                    |



|            |                        |       |       |          |      |
|------------|------------------------|-------|-------|----------|------|
| mir-3p     | hsa-miR-24-3p          | 8.44  | -0.04 | 2.46E-02 | 0.85 |
| snoRNA     | U101                   | 5.22  | -0.06 | 2.53E-02 | 0.85 |
| mir-3p     | hsa-miR-19b-3p         | 4.04  | -0.05 | 2.54E-02 | 0.85 |
| rRNA       | LSU-rRNA_Hsa-L297      | 1.90  | -0.08 | 2.64E-02 | 0.85 |
| mir-3p     | hsa-let-7d-3p          | 6.61  | -0.04 | 2.75E-02 | 0.85 |
| mir-3p     | hsa-miR-4433-3p        | 2.78  | -0.07 | 2.81E-02 | 0.85 |
| snoRNA     | U48                    | 5.72  | -0.06 | 2.81E-02 | 0.85 |
| scRNA      | HY4-L151               | 2.39  | 0.05  | 2.82E-02 | 0.85 |
| snoRNA     | ACA20                  | 2.30  | -0.09 | 2.85E-02 | 0.85 |
| snoRNA     | U105B                  | 4.75  | -0.08 | 2.88E-02 | 0.85 |
| scRNA      | HY4-L44                | 1.59  | -0.07 | 2.90E-02 | 0.85 |
| rRNA       | 5S-L189                | 2.24  | 0.07  | 2.94E-02 | 0.85 |
| snoRNA     | U63                    | 5.92  | -0.06 | 2.97E-02 | 0.85 |
| snoRNA     | U60                    | 4.21  | -0.07 | 3.17E-02 | 0.88 |
| rRNA       | LSU-rRNA_Hsa-L331      | 1.53  | 0.08  | 3.18E-02 | 0.88 |
| mir-5p     | hsa-miR-214-5p         | 1.57  | -0.09 | 3.28E-02 | 0.89 |
| scRNA      | BC200-L76              | 2.55  | 0.07  | 3.42E-02 | 0.89 |
| snoRNA     | U18A                   | 6.81  | -0.07 | 3.60E-02 | 0.89 |
| snoRNA     | SNORD127               | 4.77  | -0.08 | 3.66E-02 | 0.89 |
| snRNA      | U3-L74                 | 2.45  | -0.09 | 3.76E-02 | 0.89 |
| snoRNA     | HBII-166               | 3.05  | -0.09 | 4.02E-02 | 0.89 |
| snoRNA     | U93                    | 1.72  | -0.13 | 4.04E-02 | 0.89 |
| mir-5p     | hsa-miR-10b-5p         | 10.26 | 0.03  | 4.10E-02 | 0.89 |
| tRNA       | chr6.tRNA122-PseudoTGC | 2.61  | 0.08  | 4.13E-02 | 0.89 |
| piRNA      | piR-33082-L2           | 1.78  | -0.07 | 4.19E-02 | 0.89 |
| rRNA       | 5S-L471                | 2.19  | 0.06  | 4.21E-02 | 0.89 |
| snRNA      | U6-L1696               | 1.91  | -0.10 | 4.29E-02 | 0.89 |
| scRNA      | HY3-L203               | 1.78  | -0.07 | 4.41E-02 | 0.89 |
| snoRNA     | U49B                   | 1.62  | -0.11 | 4.57E-02 | 0.89 |
| snoRNA     | U31                    | 7.96  | -0.05 | 4.58E-02 | 0.89 |
| snoRNA     | U82                    | 5.05  | -0.06 | 4.61E-02 | 0.89 |
| rRNA       | LSU-rRNA_Hsa-L109      | 1.47  | -0.08 | 4.65E-02 | 0.89 |
| rRNA       | 5S-L303                | 2.33  | 0.07  | 4.73E-02 | 0.89 |
| mir-5p3pno | hsa-miR-598            | 1.77  | -0.10 | 4.74E-02 | 0.89 |
| piRNA      | piR-38502              | 3.33  | -0.06 | 4.75E-02 | 0.89 |
| mir-5p     | hsa-miR-338-5p         | 4.39  | -0.05 | 4.79E-02 | 0.89 |
| snoRNA     | SNORD119               | 5.61  | -0.06 | 4.81E-02 | 0.89 |
| rRNA       | LSU-rRNA_Hsa-L15       | 6.48  | 0.03  | 4.83E-02 | 0.89 |
| rRNA       | LSU-rRNA_Hsa-L67       | 3.16  | 0.08  | 4.88E-02 | 0.89 |
| snoRNA     | mgh18S-121             | 1.93  | -0.10 | 4.89E-02 | 0.89 |
| piRNA      | piR-36716              | 2.87  | -0.08 | 4.94E-02 | 0.89 |
| rRNA       | 5S-L602                | 5.12  | 0.04  | 4.96E-02 | 0.89 |
| mir-3p     | hsa-miR-450a-3p        | 1.53  | -0.08 | 4.99E-02 | 0.89 |

|            |                           |       |       |          |      |
|------------|---------------------------|-------|-------|----------|------|
| mir-3p     | hsa-miR-3177-3p           | 1.68  | -0.08 | 5.09E-02 | 0.89 |
| snoRNA     | U81                       | 6.27  | -0.06 | 5.11E-02 | 0.89 |
| snoRNA     | U3-3                      | 2.20  | -0.09 | 5.25E-02 | 0.89 |
| mir-5p     | hsa-miR-142-5p            | 5.73  | -0.04 | 5.35E-02 | 0.89 |
| mir-3p     | hsa-miR-18a-3p            | 2.18  | -0.06 | 5.42E-02 | 0.89 |
| snoRNA     | U44                       | 6.36  | -0.06 | 5.45E-02 | 0.89 |
| snoRNA     | U55                       | 5.84  | -0.06 | 5.67E-02 | 0.89 |
| snRNA      | U2-L709                   | 3.25  | 0.06  | 5.76E-02 | 0.89 |
| snoRNA     | ACA3                      | 2.48  | 0.06  | 5.76E-02 | 0.89 |
| scRNA      | HY1-L190                  | 2.42  | 0.06  | 5.91E-02 | 0.89 |
| snRNA      | U7-L207                   | 2.19  | 0.11  | 5.92E-02 | 0.89 |
| tRNA       | chr16.tRNA29-ProAGG       | 2.96  | 0.06  | 5.93E-02 | 0.89 |
| snoRNA     | U74                       | 5.78  | -0.06 | 6.16E-02 | 0.89 |
| scRNA      | BC200-L28                 | 2.06  | -0.07 | 6.18E-02 | 0.89 |
| snoRNA     | U79                       | 1.72  | -0.10 | 6.24E-02 | 0.89 |
| snoRNA     | U51                       | 2.71  | 0.08  | 6.25E-02 | 0.89 |
| rRNA       | LSU-rRNA_Hsa-L31          | 7.70  | 0.05  | 6.28E-02 | 0.89 |
| snoRNA     | HBII-142                  | 3.42  | -0.07 | 6.28E-02 | 0.89 |
| snoRNA     | U35A                      | 1.80  | -0.08 | 6.31E-02 | 0.89 |
| rRNA       | SSU-rRNA_Hsa-L46          | 6.10  | 0.04  | 6.39E-02 | 0.89 |
| tRNA       | chr17.tRNA3-GlnCTG        | 6.70  | 0.03  | 6.53E-02 | 0.89 |
| mir-5p3pno | hsa-miR-487b              | 1.50  | -0.10 | 6.58E-02 | 0.89 |
| mir-5p     | hsa-miR-23b-5p            | 1.51  | -0.09 | 6.69E-02 | 0.89 |
| scRNA      | HY4-L96                   | 3.68  | 0.03  | 6.78E-02 | 0.89 |
| snoRNA     | U50                       | 5.82  | -0.05 | 6.82E-02 | 0.89 |
| snRNA      | U6-L440                   | 1.97  | -0.09 | 6.87E-02 | 0.89 |
| rRNA       | 5S-L1196                  | 2.22  | -0.08 | 6.89E-02 | 0.89 |
| snoRNA     | HBII-85-3                 | 2.57  | -0.09 | 6.93E-02 | 0.89 |
| rRNA       | LSU-rRNA_Hsa-L403         | 9.95  | 0.03  | 7.01E-02 | 0.89 |
| snoRNA     | U76                       | 2.36  | -0.09 | 7.01E-02 | 0.89 |
| mir-3p     | hsa-miR-223-3p            | 7.30  | -0.05 | 7.05E-02 | 0.89 |
| snoRNA     | U25                       | 5.19  | -0.07 | 7.05E-02 | 0.89 |
| rRNA       | LSU-rRNA_Hsa-L323         | 8.20  | 0.04  | 7.10E-02 | 0.89 |
| rRNA       | LSU-rRNA_Hsa-L39          | 7.57  | -0.04 | 7.24E-02 | 0.89 |
| mir-5p     | hsa-miR-1304-5p           | 1.47  | -0.08 | 7.28E-02 | 0.89 |
| rRNA       | 5S-L297                   | 1.59  | -0.08 | 7.31E-02 | 0.89 |
| rRNA       | 5S-L71                    | 1.74  | 0.06  | 7.44E-02 | 0.89 |
| snoRNA     | mgU6-77                   | 4.50  | -0.06 | 7.46E-02 | 0.89 |
| snoRNA     | HBII-429                  | 4.20  | -0.07 | 7.49E-02 | 0.89 |
| rRNA       | LSU-rRNA_Hsa-L380         | 13.98 | -0.03 | 7.49E-02 | 0.89 |
| tRF5       | chr3.tRNA9-PseudoTTG-tRF5 | 1.99  | 0.09  | 7.50E-02 | 0.89 |
| tRNA       | chr14.tRNA8-CysGCA        | 4.27  | 0.09  | 7.54E-02 | 0.89 |
| tRNA       | chr1.tRNA88-PseudoCCT     | 6.19  | 0.04  | 7.60E-02 | 0.89 |

|            |                        |       |       |          |      |
|------------|------------------------|-------|-------|----------|------|
| piRNA      | piR-35548-L2           | 7.18  | -0.04 | 7.61E-02 | 0.89 |
| snoRNA     | U103B                  | 3.29  | -0.07 | 7.62E-02 | 0.89 |
| snoRNA     | HBII-13                | 3.91  | -0.08 | 7.68E-02 | 0.89 |
| snoRNA     | U47                    | 3.87  | -0.07 | 7.86E-02 | 0.90 |
| scRNA      | BC200-L20              | 1.94  | -0.08 | 8.00E-02 | 0.90 |
| piRNA      | piR-60565-L12          | 10.99 | 0.04  | 8.07E-02 | 0.90 |
| piRNA      | piR-59299              | 1.72  | -0.07 | 8.09E-02 | 0.90 |
| snoRNA     | U37                    | 1.76  | -0.09 | 8.17E-02 | 0.90 |
| tRNA       | chr1.tRNA99-ValCAC     | 8.58  | 0.04  | 8.25E-02 | 0.90 |
| tRNA       | chr17.tRNA13-GlyCCC    | 5.81  | 0.04  | 8.28E-02 | 0.90 |
| tRNA       | chr14.tRNA10-IleAAT    | 1.41  | -0.08 | 8.30E-02 | 0.90 |
| snRNA      | U3-L79                 | 3.27  | -0.06 | 8.38E-02 | 0.90 |
| mir-5p3pno | hsa-miR-4326           | 1.51  | -0.08 | 8.40E-02 | 0.90 |
| snoRNA     | U42B                   | 4.22  | -0.07 | 8.45E-02 | 0.90 |
| tRNA       | chr12.tRNA2-SerCGA     | 1.52  | -0.11 | 8.53E-02 | 0.90 |
| mir-5p     | hsa-miR-16-5p-L2       | 8.44  | -0.04 | 8.62E-02 | 0.90 |
| rRNA       | 5S-L1091               | 1.37  | 0.06  | 8.64E-02 | 0.90 |
| snoRNA     | U41                    | 2.48  | -0.07 | 8.69E-02 | 0.90 |
| mir-3p     | hsa-miR-19a-3p         | 4.16  | -0.04 | 8.71E-02 | 0.90 |
| rRNA       | LSU-rRNA_Hsa-L298      | 3.46  | 0.05  | 9.25E-02 | 0.92 |
| rRNA       | LSU-rRNA_Hsa-L355      | 3.31  | -0.04 | 9.28E-02 | 0.92 |
| scRNA      | BC200-L85              | 1.96  | 0.06  | 9.34E-02 | 0.92 |
| rRNA       | LSU-rRNA_Hsa-L165      | 7.53  | -0.04 | 9.38E-02 | 0.92 |
| scRNA      | HY1-L397               | 3.27  | 0.04  | 9.38E-02 | 0.92 |
| mir-3p     | hsa-miR-132-3p         | 1.92  | -0.07 | 9.43E-02 | 0.92 |
| snoRNA     | U73a                   | 1.79  | -0.08 | 9.49E-02 | 0.92 |
| snoRNA     | U62B                   | 3.71  | -0.06 | 9.50E-02 | 0.92 |
| tRNA       | chr13.tRNA3-GluTTC     | 10.17 | 0.03  | 0.10     | 0.92 |
| snoRNA     | U80                    | 3.36  | 0.05  | 0.10     | 0.92 |
| snoRNA     | U32A                   | 4.08  | -0.06 | 0.10     | 0.92 |
| mir-5p     | hsa-miR-15b-5p         | 2.72  | -0.04 | 0.10     | 0.92 |
| rRNA       | 5S-L1129               | 1.90  | 0.05  | 0.10     | 0.92 |
| tRNA       | chr16.tRNA13-PseudoCTT | 4.70  | 0.05  | 0.10     | 0.92 |
| snoRNA     | E2                     | 2.14  | -0.07 | 0.10     | 0.92 |
| snoRNA     | ACA16                  | 2.80  | -0.07 | 0.10     | 0.92 |
| piRNA      | piR-52416-L2           | 2.28  | -0.06 | 0.10     | 0.92 |
| piRNA      | piR-31925-L9           | 13.82 | 0.03  | 0.10     | 0.92 |
| mir-5p     | hsa-miR-25-5p          | 2.07  | -0.07 | 0.10     | 0.93 |
| piRNA      | piR-36742              | 5.15  | 0.04  | 0.10     | 0.93 |
| snoRNA     | ACA54                  | 1.59  | -0.07 | 0.10     | 0.93 |
| snoRNA     | HBII-180C              | 4.12  | -0.05 | 0.10     | 0.93 |
| rRNA       | 5S-L627                | 1.59  | 0.06  | 0.11     | 0.94 |
| scRNA      | BC200-L108             | 2.02  | 0.05  | 0.11     | 0.95 |

|        |                          |       |       |      |      |
|--------|--------------------------|-------|-------|------|------|
| scRNA  | BC200-L96                | 5.30  | 0.04  | 0.11 | 0.95 |
| scRNA  | HY4-L103                 | 4.44  | -0.04 | 0.11 | 0.95 |
| tRNA   | chr6.tRNA98-LeuAAG       | 2.93  | 0.06  | 0.11 | 0.95 |
| snoRNA | U50B                     | 4.34  | -0.06 | 0.11 | 0.95 |
| tRNA   | chr6.tRNA123-SerGCT      | 2.23  | 0.05  | 0.11 | 0.95 |
| tRNA   | chr1.tRNA96-PseudoCCT    | 8.20  | 0.03  | 0.11 | 0.95 |
| piRNA  | piR-35284                | 8.07  | 0.04  | 0.12 | 0.95 |
| piRNA  | piR-43771-L6             | 2.90  | 0.05  | 0.12 | 0.95 |
| piRNA  | piR-60565-L4             | 12.26 | 0.03  | 0.12 | 0.95 |
| mir-5p | hsa-miR-3679-5p          | 2.94  | 0.05  | 0.12 | 0.95 |
| snoRNA | HBII-336                 | 2.07  | -0.07 | 0.12 | 0.95 |
| tRNA   | chr16.tRNA24-GlyGCC      | 15.82 | 0.03  | 0.12 | 0.95 |
| piRNA  | piR-33160                | 1.68  | -0.05 | 0.12 | 0.95 |
| snRNA  | U1-L7                    | 6.15  | -0.03 | 0.12 | 0.95 |
| scRNA  | HY3-L282                 | 3.75  | -0.04 | 0.12 | 0.96 |
| tRNA   | chr2.tRNA3-AlaAGC        | 3.59  | 0.06  | 0.12 | 0.96 |
| snoRNA | U23                      | 1.46  | 0.06  | 0.12 | 0.97 |
| scRNA  | HY1-L342                 | 1.37  | 0.07  | 0.12 | 0.97 |
| rRNA   | LSU-rRNA_Hsa-L58         | 7.02  | 0.03  | 0.12 | 0.97 |
| snoRNA | SNORD126                 | 2.74  | -0.06 | 0.12 | 0.97 |
| rRNA   | 5S-L489                  | 5.18  | 0.12  | 0.13 | 0.98 |
| mir-3p | hsa-miR-221-3p           | 7.16  | -0.03 | 0.13 | 0.98 |
| rRNA   | LSU-rRNA_Hsa-L18         | 5.98  | 0.04  | 0.13 | 0.98 |
| rRNA   | LSU-rRNA_Hsa-L130        | 4.63  | 0.06  | 0.13 | 0.98 |
| piRNA  | piR-31925                | 11.30 | 0.03  | 0.13 | 0.98 |
| mir-5p | hsa-miR-30e-5p           | 8.13  | -0.03 | 0.13 | 0.98 |
| tRNA   | chr17.tRNA14-ThrCGT      | 1.87  | 0.07  | 0.13 | 0.98 |
| rRNA   | 5S-L688                  | 4.43  | 0.03  | 0.13 | 0.98 |
| mir-3p | hsa-miR-125b-2-3p        | 1.53  | 0.07  | 0.13 | 0.98 |
| mir-5p | hsa-miR-106b-5p          | 3.53  | -0.03 | 0.13 | 0.98 |
| scRNA  | BC200-L148               | 2.11  | 0.06  | 0.13 | 0.98 |
| tRNA   | chr1.tRNA79-GlyTCC       | 1.87  | 0.06  | 0.13 | 0.98 |
| snoRNA | ACA51                    | 2.15  | -0.05 | 0.13 | 0.98 |
| tRF5   | chr5.tRNA22-AspGTC-tRF5  | 2.30  | -0.05 | 0.13 | 0.98 |
| rRNA   | LSU-rRNA_Hsa-L304        | 2.50  | -0.05 | 0.13 | 0.98 |
| scRNA  | BC200-L12                | 1.72  | -0.08 | 0.14 | 0.98 |
| snRNA  | U1-L33                   | 2.56  | 0.05  | 0.14 | 0.98 |
| rRNA   | LSU-rRNA_Hsa-L300        | 7.63  | -0.05 | 0.14 | 0.98 |
| rRNA   | SSU-rRNA_Hsa-L67         | 3.08  | -0.04 | 0.14 | 0.98 |
| snoRNA | U21                      | 4.60  | -0.05 | 0.14 | 0.98 |
| snRNA  | U1-L17                   | 1.82  | -0.09 | 0.14 | 0.99 |
| scRNA  | HY1-L276                 | 3.15  | 0.03  | 0.14 | 1.00 |
| tRF5   | chr16.tRNA23-LysTTT-tRF5 | 3.56  | 0.06  | 0.14 | 1.00 |

|            |                            |       |       |      |      |
|------------|----------------------------|-------|-------|------|------|
| snoRNA     | U18B                       | 2.75  | -0.06 | 0.14 | 1.00 |
| mir-5p     | hsa-miR-130b-5p            | 4.40  | -0.04 | 0.14 | 1.00 |
| tRNA       | chr1.tRNA43-GlyGCC         | 6.87  | 0.03  | 0.15 | 1.00 |
| piRNA      | piR-33404                  | 6.30  | -0.04 | 0.15 | 1.00 |
| piRNA      | piR-38354                  | 2.15  | -0.05 | 0.15 | 1.00 |
| tRNA       | chr5.tRNA8-AlaTGC          | 3.15  | 0.06  | 0.15 | 1.00 |
| snoRNA     | U45C                       | 2.62  | -0.06 | 0.15 | 1.00 |
| scRNA      | HY1-L121                   | 2.72  | -0.04 | 0.15 | 1.00 |
| rRNA       | 5S-L990                    | 3.08  | 0.03  | 0.15 | 1.00 |
| scRNA      | BC200-L27                  | 2.97  | 0.05  | 0.15 | 1.00 |
| mir-5p3pno | hsa-miR-128                | 8.32  | -0.03 | 0.15 | 1.00 |
| snoRNA     | snR39B                     | 5.72  | -0.04 | 0.15 | 1.00 |
| piRNA      | piR-35982                  | 15.63 | 0.04  | 0.15 | 1.00 |
| scRNA      | HY3-L34                    | 3.61  | -0.05 | 0.15 | 1.00 |
| tRNA       | chr6.tRNA172-SerTGA        | 1.90  | -0.07 | 0.16 | 1.00 |
| snoRNA     | U85                        | 3.06  | -0.05 | 0.16 | 1.00 |
| tRNA       | chr16.tRNA33-PseudoAGG     | 3.64  | 0.04  | 0.16 | 1.00 |
| snoRNA     | U66                        | 1.79  | -0.06 | 0.16 | 1.00 |
| tRNA       | chr5.tRNA15-ValAAC         | 4.70  | -0.03 | 0.16 | 1.00 |
| snoRNA     | ACA11                      | 2.12  | -0.06 | 0.16 | 1.00 |
| scRNA      | BC200-L38                  | 1.59  | -0.07 | 0.16 | 1.00 |
| snoRNA     | mgh28S-2411                | 6.56  | -0.04 | 0.16 | 1.00 |
| mir-3p     | hsa-miR-4742-3p            | 1.43  | -0.07 | 0.16 | 1.00 |
| snoRNA     | ACA53                      | 3.01  | -0.07 | 0.16 | 1.00 |
| mir-3p     | hsa-miR-125a-3p            | 3.83  | 0.04  | 0.16 | 1.00 |
| tRNA       | chr14.tRNA2-LeuTAG         | 2.26  | 0.06  | 0.16 | 1.00 |
| mir-5p3pno | hsa-miR-320b               | 4.99  | -0.03 | 0.16 | 1.00 |
| mir-5p     | hsa-miR-361-5p             | 3.48  | -0.04 | 0.16 | 1.00 |
| mir-3p     | hsa-miR-708-3p             | 1.52  | 0.07  | 0.17 | 1.00 |
| mir-5p     | hsa-miR-642b-5p            | 1.56  | -0.06 | 0.17 | 1.00 |
| tRNA       | chr14.tRNA3-ProTGG         | 3.97  | 0.03  | 0.17 | 1.00 |
| snoRNA     | U30                        | 6.13  | -0.05 | 0.17 | 1.00 |
| mir-5p     | hsa-miR-132-5p             | 2.49  | -0.05 | 0.17 | 1.00 |
| mir-3p     | hsa-miR-130b-3p            | 2.46  | -0.04 | 0.17 | 1.00 |
| snRNA      | U5-L108                    | 2.23  | 0.07  | 0.17 | 1.00 |
| tRF5       | chr1.tRNA125-PseudoGTT-tRF | 1.49  | 0.05  | 0.17 | 1.00 |
| mir-3p     | hsa-miR-574-3p             | 1.66  | -0.05 | 0.17 | 1.00 |
| tRNA       | chr2.tRNA14-TyrATA         | 3.30  | 0.04  | 0.17 | 1.00 |
| snoRNA     | HBII-234                   | 2.39  | -0.06 | 0.18 | 1.00 |
| snoRNA     | ACA58                      | 1.85  | -0.07 | 0.18 | 1.00 |
| mir-3p     | hsa-miR-374a-3p            | 3.84  | 0.03  | 0.18 | 1.00 |
| snRNA      | U5-L3                      | 2.02  | 0.05  | 0.18 | 1.00 |
| mir-5p3pno | hsa-miR-181d               | 3.90  | -0.03 | 0.18 | 1.00 |

|            |                            |       |       |      |      |
|------------|----------------------------|-------|-------|------|------|
| rRNA       | LSU-rRNA_Hsa-L178          | 3.24  | 0.04  | 0.18 | 1.00 |
| tRNA       | chr13.tRNA5-GluTTC         | 8.98  | 0.02  | 0.18 | 1.00 |
| snoRNA     | HBII-210                   | 5.46  | -0.04 | 0.18 | 1.00 |
| rRNA       | LSU-rRNA_Hsa-L132          | 10.51 | 0.02  | 0.18 | 1.00 |
| mir-5p3pno | hsa-miR-3909               | 1.71  | -0.05 | 0.18 | 1.00 |
| snoRNA     | U92                        | 2.16  | -0.04 | 0.18 | 1.00 |
| snoRNA     | U20                        | 6.66  | -0.05 | 0.18 | 1.00 |
| tRF5       | chr1.tRNA132-PseudoCAC-tRF | 2.10  | -0.05 | 0.18 | 1.00 |
| mir-3p     | hsa-miR-200c-3p            | 2.75  | 0.04  | 0.18 | 1.00 |
| snRNA      | U2-L825                    | 3.19  | 0.05  | 0.19 | 1.00 |
| piRNA      | piR-34041                  | 4.17  | -0.05 | 0.19 | 1.00 |
| mir-5p     | hsa-miR-10a-5p             | 8.93  | 0.02  | 0.19 | 1.00 |
| mir-5p3pno | hsa-miR-4461               | 2.06  | -0.07 | 0.19 | 1.00 |
| rRNA       | 5S-L472                    | 2.70  | 0.04  | 0.19 | 1.00 |
| tRNA       | chr16.tRNA18-GlyGCC        | 1.78  | -0.05 | 0.19 | 1.00 |
| snRNA      | U5-L76                     | 2.56  | -0.05 | 0.19 | 1.00 |
| tRNA       | chr6.tRNA82-GlyGCC         | 5.27  | 0.03  | 0.19 | 1.00 |
| scRNA      | HY1-L439                   | 2.44  | 0.03  | 0.19 | 1.00 |
| snRNA      | U1-L43                     | 1.93  | 0.04  | 0.19 | 1.00 |
| tRF5       | chr17.tRNA26-CysGCA-tRF5   | 5.39  | -0.03 | 0.19 | 1.00 |
| tRNA       | chr16.tRNA2-ArgCCT         | 3.09  | -0.04 | 0.20 | 1.00 |
| rRNA       | 5S-L746                    | 2.21  | 0.05  | 0.20 | 1.00 |
| piRNA      | piR-36412                  | 2.36  | 0.04  | 0.20 | 1.00 |
| mir-5p     | hsa-miR-100-5p             | 6.59  | 0.03  | 0.20 | 1.00 |
| snoRNA     | HBII-180A                  | 2.03  | -0.08 | 0.20 | 1.00 |
| piRNA      | piR-35548-L4               | 7.22  | -0.03 | 0.20 | 1.00 |
| tRNA       | chr2.tRNA17-PseudoTTC      | 7.07  | 0.03  | 0.20 | 1.00 |
| rRNA       | 5S-L1214                   | 1.33  | -0.05 | 0.20 | 1.00 |
| mir-5p     | hsa-miR-125a-5p            | 4.98  | -0.03 | 0.20 | 1.00 |
| scRNA      | HY4-L70                    | 9.07  | 0.02  | 0.20 | 1.00 |
| snoRNA     | HBII-99                    | 4.90  | -0.04 | 0.20 | 1.00 |
| mir-5p     | hsa-miR-140-5p             | 4.19  | -0.03 | 0.20 | 1.00 |
| mir-5p3pno | hsa-miR-203a               | 2.28  | -0.07 | 0.21 | 1.00 |
| mir-5p     | hsa-miR-20b-5p             | 3.49  | -0.04 | 0.21 | 1.00 |
| rRNA       | LSU-rRNA_Hsa-L309          | 8.19  | -0.03 | 0.21 | 1.00 |
| scRNA      | HY1-L149                   | 3.78  | -0.03 | 0.21 | 1.00 |
| rRNA       | SSU-rRNA_Hsa-L10           | 11.45 | -0.02 | 0.21 | 1.00 |
| tRF5       | chr6.tRNA78-LeuAAG-tRF5    | 1.31  | 0.07  | 0.21 | 1.00 |
| scRNA      | HY1-L352                   | 1.78  | -0.06 | 0.21 | 1.00 |
| snoRNA     | ACA7                       | 2.30  | -0.06 | 0.21 | 1.00 |
| mir-5p3pno | hsa-miR-548k               | 1.89  | -0.05 | 0.21 | 1.00 |
| piRNA      | piR-48772-L2               | 1.95  | -0.05 | 0.21 | 1.00 |
| mir-3p     | hsa-miR-30a-3p             | 5.31  | 0.02  | 0.21 | 1.00 |

|            |                          |       |       |      |      |
|------------|--------------------------|-------|-------|------|------|
| rRNA       | 5S-L515                  | 2.06  | -0.04 | 0.21 | 1.00 |
| rRNA       | LSU-rRNA_Hsa-L388        | 10.79 | -0.02 | 0.21 | 1.00 |
| scRNA      | BC200-L147               | 2.25  | -0.06 | 0.21 | 1.00 |
| snoRNA     | U15A                     | 2.09  | -0.06 | 0.21 | 1.00 |
| mir-5p3pno | hsa-miR-484              | 6.24  | -0.02 | 0.22 | 1.00 |
| mir-5p3pno | hsa-miR-1294             | 1.62  | 0.06  | 0.22 | 1.00 |
| scRNA      | HY4-L77                  | 2.15  | 0.03  | 0.22 | 1.00 |
| mir-5p     | hsa-miR-151a-5p          | 6.40  | -0.03 | 0.22 | 1.00 |
| tRNA       | chr6.tRNA88-PseudoGAA    | 8.20  | 0.03  | 0.22 | 1.00 |
| mir-5p     | hsa-miR-4732-5p          | 3.27  | 0.03  | 0.22 | 1.00 |
| mir-3p     | hsa-let-7i-3p            | 1.50  | -0.05 | 0.22 | 1.00 |
| tRF5       | chr1.tRNA130-ValCAC-tRF5 | 2.38  | 0.04  | 0.22 | 1.00 |
| tRNA       | chr14.tRNA16-TyrGTA      | 3.58  | -0.04 | 0.22 | 1.00 |
| piRNA      | piR-31115-L2             | 6.67  | -0.02 | 0.22 | 1.00 |
| piRNA      | piR-61298                | 1.91  | -0.08 | 0.22 | 1.00 |
| mir-5p3pno | hsa-miR-1278             | 1.56  | -0.06 | 0.22 | 1.00 |
| snRNA      | U2-L285                  | 2.96  | 0.04  | 0.22 | 1.00 |
| mir-5p3pno | hsa-miR-320e             | 1.85  | 0.04  | 0.22 | 1.00 |
| scRNA      | HY4-L68                  | 4.03  | 0.02  | 0.22 | 1.00 |
| scRNA      | HY3-L524                 | 1.56  | -0.05 | 0.22 | 1.00 |
| scRNA      | HY1-L137                 | 4.44  | 0.03  | 0.23 | 1.00 |
| scRNA      | HY4-L160                 | 7.28  | 0.02  | 0.23 | 1.00 |
| scRNA      | HY4-L116                 | 3.88  | 0.03  | 0.23 | 1.00 |
| snoRNA     | U84                      | 2.09  | -0.05 | 0.23 | 1.00 |
| scRNA      | HY3-L525                 | 1.38  | -0.05 | 0.23 | 1.00 |
| snoRNA     | U90                      | 2.75  | 0.06  | 0.23 | 1.00 |
| rRNA       | 5S-L254                  | 2.29  | 0.04  | 0.23 | 1.00 |
| mir-5p3pno | hsa-miR-3928             | 1.51  | -0.06 | 0.23 | 1.00 |
| scRNA      | HY1-L25                  | 1.88  | 0.04  | 0.23 | 1.00 |
| mir-5p     | hsa-miR-574-5p           | 4.85  | 0.03  | 0.23 | 1.00 |
| tRNA       | chr6.tRNA168-TrpCCA      | 2.05  | -0.05 | 0.23 | 1.00 |
| snoRNA     | U61                      | 5.55  | -0.04 | 0.23 | 1.00 |
| tRF3       | chr17.tRNA13-GlyCCC-tRF3 | 5.22  | -0.03 | 0.23 | 1.00 |
| tRNA       | chr6.tRNA6-ArgACG        | 2.65  | -0.04 | 0.23 | 1.00 |
| scRNA      | HY4-L122                 | 7.82  | 0.02  | 0.23 | 1.00 |
| tRF5       | chr19.tRNA5-LysCTT-tRF5  | 4.33  | 0.04  | 0.23 | 1.00 |
| mir-5p3pno | hsa-miR-543              | 5.86  | -0.03 | 0.23 | 1.00 |
| snoRNA     | E3                       | 2.66  | 0.03  | 0.24 | 1.00 |
| rRNA       | 5S-L877                  | 2.33  | 0.03  | 0.24 | 1.00 |
| snRNA      | U17-L2                   | 2.12  | -0.05 | 0.24 | 1.00 |
| tRNA       | chr13.tRNA4-GluCTC       | 2.04  | -0.03 | 0.24 | 1.00 |
| piRNA      | piR-36041                | 7.32  | 0.02  | 0.24 | 1.00 |
| tRNA       | chr5.tRNA14-ProTGG       | 4.85  | -0.03 | 0.24 | 1.00 |

|            |                         |       |       |      |      |
|------------|-------------------------|-------|-------|------|------|
| snoRNA     | U87                     | 1.65  | -0.06 | 0.24 | 1.00 |
| scRNA      | HY1-L171                | 1.68  | -0.03 | 0.24 | 1.00 |
| tRNA       | chr6.tRNA38-IleAAT      | 3.15  | -0.07 | 0.24 | 1.00 |
| scRNA      | BC200-L68               | 2.33  | 0.05  | 0.24 | 1.00 |
| mir-5p     | hsa-miR-411-5p          | 2.70  | -0.05 | 0.24 | 1.00 |
| scRNA      | HY4-L30                 | 3.53  | 0.02  | 0.24 | 1.00 |
| snoRNA     | U64                     | 2.08  | -0.05 | 0.24 | 1.00 |
| tRNA       | chr11.tRNA13-PheGAA     | 3.60  | -0.04 | 0.24 | 1.00 |
| tRNA       | chr17.tRNA41-SerCGA     | 2.38  | 0.07  | 0.25 | 1.00 |
| mir-3p     | hsa-miR-548g-3p         | 2.14  | 0.04  | 0.25 | 1.00 |
| piRNA      | piR-47305               | 9.66  | 0.03  | 0.25 | 1.00 |
| scRNA      | HY4-L46                 | 9.09  | 0.02  | 0.25 | 1.00 |
| tRF5       | chr14.tRNA4-ThrTGT-tRF5 | 2.23  | -0.04 | 0.25 | 1.00 |
| mir-3p     | hsa-miR-330-3p          | 3.77  | -0.03 | 0.25 | 1.00 |
| snoRNA     | snR38C                  | 2.03  | -0.06 | 0.25 | 1.00 |
| mir-3p     | hsa-miR-495-3p          | 2.88  | -0.04 | 0.25 | 1.00 |
| scRNA      | BC200-L37               | 6.33  | -0.02 | 0.25 | 1.00 |
| mir-5p     | hsa-miR-374a-5p         | 2.91  | -0.03 | 0.25 | 1.00 |
| tRNA       | chr6.tRNA138-ArgACG     | 1.66  | -0.05 | 0.25 | 1.00 |
| scRNA      | HY4-L138                | 8.42  | 0.02  | 0.26 | 1.00 |
| scRNA      | HY4-L120                | 9.92  | 0.02  | 0.26 | 1.00 |
| mir-5p     | hsa-miR-3605-5p         | 2.60  | -0.04 | 0.26 | 1.00 |
| scRNA      | HY1-L389                | 2.66  | 0.03  | 0.26 | 1.00 |
| mir-3p     | hsa-miR-101-3p          | 10.61 | 0.02  | 0.26 | 1.00 |
| piRNA      | piR-43325-L2            | 2.34  | -0.04 | 0.26 | 1.00 |
| scRNA      | HY4-L36                 | 2.19  | -0.04 | 0.26 | 1.00 |
| snoRNA     | U49A                    | 7.52  | -0.03 | 0.27 | 1.00 |
| snRNA      | U1-L38                  | 1.64  | 0.05  | 0.27 | 1.00 |
| snoRNA     | U99                     | 3.13  | -0.04 | 0.27 | 1.00 |
| tRNA       | chr1.tRNA39-GlyGCC      | 11.35 | 0.02  | 0.27 | 1.00 |
| scRNA      | HY1-L261                | 1.76  | -0.04 | 0.27 | 1.00 |
| piRNA      | piR-33382               | 8.69  | -0.02 | 0.27 | 1.00 |
| snoRNA     | ACA61                   | 2.02  | 0.05  | 0.27 | 1.00 |
| piRNA      | piR-36494               | 2.00  | -0.06 | 0.27 | 1.00 |
| scRNA      | HY1-L302                | 2.49  | -0.03 | 0.28 | 1.00 |
| scRNA      | BC200-L46               | 1.64  | -0.05 | 0.28 | 1.00 |
| mir-5p3pno | hsa-miR-378e            | 1.49  | -0.04 | 0.28 | 1.00 |
| mir-5p3pno | hsa-miR-1290            | 2.05  | 0.07  | 0.28 | 1.00 |
| scRNA      | BC200-L11               | 1.53  | 0.04  | 0.28 | 1.00 |
| tRNA       | chr6.tRNA129-MetCAT     | 5.33  | 0.03  | 0.28 | 1.00 |
| scRNA      | BC200-L166              | 2.95  | -0.03 | 0.28 | 1.00 |
| rRNA       | 5S-L1067                | 2.57  | 0.03  | 0.28 | 1.00 |
| mir-3p     | hsa-let-7a-3p-L2        | 3.02  | -0.03 | 0.28 | 1.00 |



|            |                     |       |       |      |      |
|------------|---------------------|-------|-------|------|------|
| tRNA       | chr6.tRNA37-ValAAC  | 9.05  | 0.02  | 0.28 | 1.00 |
| scRNA      | HY1-L227            | 1.30  | 0.04  | 0.28 | 1.00 |
| rRNA       | LSU-rRNA_Hsa-L278   | 2.72  | -0.03 | 0.28 | 1.00 |
| piRNA      | piR-35411-L4        | 2.53  | 0.03  | 0.28 | 1.00 |
| scRNA      | HY3-L35             | 2.20  | 0.04  | 0.28 | 1.00 |
| snoRNA     | snR38B              | 3.26  | -0.04 | 0.28 | 1.00 |
| rRNA       | SSU-rRNA_Hsa-L65    | 4.28  | -0.02 | 0.29 | 1.00 |
| mir-5p3pno | hsa-miR-451a        | 12.70 | -0.02 | 0.29 | 1.00 |
| mir-3p     | hsa-miR-3591-3p     | 12.23 | 0.04  | 0.29 | 1.00 |
| snRNA      | U6-L503             | 1.31  | 0.05  | 0.29 | 1.00 |
| snoRNA     | HBII-99B            | 1.87  | -0.05 | 0.29 | 1.00 |
| rRNA       | 5S-L1114            | 1.68  | 0.03  | 0.29 | 1.00 |
| snoRNA     | U53                 | 2.70  | -0.04 | 0.29 | 1.00 |
| rRNA       | LSU-rRNA_Hsa-L236   | 1.43  | -0.04 | 0.29 | 1.00 |
| rRNA       | 5S-L762             | 4.86  | 0.02  | 0.29 | 1.00 |
| mir-5p3pno | hsa-miR-1976        | 1.89  | -0.04 | 0.29 | 1.00 |
| rRNA       | 5S-L106             | 12.29 | 0.02  | 0.29 | 1.00 |
| tRNA       | chr11.tRNA12-ProTGG | 8.16  | 0.02  | 0.29 | 1.00 |
| tRNA       | chr1.tRNA2-GlyCCC   | 5.38  | 0.03  | 0.29 | 1.00 |
| snoRNA     | HBII-55             | 4.50  | -0.04 | 0.29 | 1.00 |
| snoRNA     | U13-L162            | 2.03  | 0.03  | 0.30 | 1.00 |
| tRNA       | chr16.tRNA32-LysCTT | 2.11  | -0.03 | 0.30 | 1.00 |
| snoRNA     | U33                 | 4.23  | -0.03 | 0.30 | 1.00 |
| rRNA       | SSU-rRNA_Hsa-L3     | 1.28  | 0.04  | 0.30 | 1.00 |
| scRNA      | HY4-L35             | 7.15  | 0.02  | 0.30 | 1.00 |
| rRNA       | SSU-rRNA_Hsa-L24    | 9.30  | 0.02  | 0.30 | 1.00 |
| scRNA      | BC200-L49           | 4.36  | 0.02  | 0.30 | 1.00 |
| scRNA      | HY4-L111            | 9.50  | 0.01  | 0.30 | 1.00 |
| mir-5p3pno | hsa-miR-1301        | 4.06  | -0.02 | 0.30 | 1.00 |
| scRNA      | HY4-L135            | 18.67 | 0.01  | 0.30 | 1.00 |
| piRNA      | piR-45195-L2        | 1.33  | -0.05 | 0.31 | 1.00 |
| scRNA      | BC200-L139          | 3.27  | 0.03  | 0.31 | 1.00 |
| scRNA      | HY3-L279            | 5.21  | -0.02 | 0.31 | 1.00 |
| scRNA      | HY3-L208            | 1.34  | 0.04  | 0.31 | 1.00 |
| mir-5p     | hsa-miR-223-5p      | 8.71  | -0.02 | 0.31 | 1.00 |
| tRNA       | chr1.tRNA58-LeuCAA  | 3.40  | 0.03  | 0.31 | 1.00 |
| scRNA      | HY4                 | 10.16 | 0.01  | 0.31 | 1.00 |
| piRNA      | piR-30112           | 2.68  | -0.04 | 0.31 | 1.00 |
| piRNA      | piR-33065           | 4.52  | 0.03  | 0.31 | 1.00 |
| mir-3p     | hsa-miR-92b-3p      | 4.74  | -0.02 | 0.31 | 1.00 |
| mir-3p     | hsa-miR-3150b-3p    | 1.47  | 0.05  | 0.31 | 1.00 |
| snoRNA     | ACA36               | 1.90  | -0.05 | 0.31 | 1.00 |
| mir-3p     | hsa-miR-4732-3p     | 2.44  | -0.04 | 0.31 | 1.00 |

|        |                            |       |       |      |      |
|--------|----------------------------|-------|-------|------|------|
| snRNA  | U2-L765                    | 2.07  | 0.04  | 0.31 | 1.00 |
| scRNA  | BC200-L18                  | 3.08  | -0.03 | 0.31 | 1.00 |
| mir-3p | hsa-miR-3187-3p            | 1.63  | -0.04 | 0.32 | 1.00 |
| scRNA  | HY4-L14                    | 8.83  | 0.01  | 0.32 | 1.00 |
| mir-3p | hsa-miR-99b-3p             | 3.53  | 0.02  | 0.32 | 1.00 |
| tRNA   | chr1.tRNA117-GlyTCC        | 2.71  | -0.02 | 0.32 | 1.00 |
| scRNA  | HY4-L87                    | 9.96  | 0.01  | 0.32 | 1.00 |
| tRNA   | chr1.tRNA116-GluCTC        | 3.79  | -0.02 | 0.32 | 1.00 |
| scRNA  | HY4-L139                   | 10.83 | -0.01 | 0.32 | 1.00 |
| mir-3p | hsa-miR-181a-3p            | 2.62  | 0.03  | 0.32 | 1.00 |
| mir-5p | hsa-miR-146a-5p            | 9.39  | -0.02 | 0.32 | 1.00 |
| scRNA  | HY4-L98                    | 9.97  | 0.01  | 0.32 | 1.00 |
| scRNA  | HY4-L154                   | 1.53  | 0.04  | 0.32 | 1.00 |
| scRNA  | BC200-L36                  | 2.68  | 0.04  | 0.32 | 1.00 |
| rRNA   | LSU-rRNA_Hsa-L147          | 2.70  | 0.04  | 0.32 | 1.00 |
| mir-5p | hsa-miR-122-5p             | 9.88  | 0.03  | 0.32 | 1.00 |
| snRNA  | U1-L78                     | 1.40  | 0.04  | 0.32 | 1.00 |
| piRNA  | piR-31925-L8               | 7.36  | 0.02  | 0.32 | 1.00 |
| mir-5p | hsa-miR-331-5p             | 1.28  | -0.04 | 0.33 | 1.00 |
| snRNA  | U3-L18                     | 6.00  | 0.03  | 0.33 | 1.00 |
| scRNA  | HY4-L16                    | 3.92  | 0.02  | 0.33 | 1.00 |
| scRNA  | HY1-L269                   | 1.87  | 0.03  | 0.33 | 1.00 |
| snRNA  | U2-L218                    | 1.62  | 0.05  | 0.33 | 1.00 |
| rRNA   | 5S-L1178                   | 1.51  | 0.03  | 0.33 | 1.00 |
| tRNA   | chr3.tRNA7-CysGCA          | 1.80  | -0.03 | 0.33 | 1.00 |
| snoRNA | U104                       | 7.46  | -0.03 | 0.33 | 1.00 |
| scRNA  | HY1-L3                     | 3.10  | 0.02  | 0.33 | 1.00 |
| snoRNA | HBII-382                   | 2.17  | -0.05 | 0.33 | 1.00 |
| snoRNA | HBII-135                   | 5.06  | -0.04 | 0.33 | 1.00 |
| scRNA  | HY1-L324                   | 1.92  | 0.04  | 0.33 | 1.00 |
| scRNA  | HY4-L17                    | 10.67 | 0.01  | 0.33 | 1.00 |
| tRF3   | chr16.tRNA11-ProAGG-tRF3   | 1.79  | 0.03  | 0.33 | 1.00 |
| scRNA  | BC200-L138                 | 4.89  | 0.02  | 0.33 | 1.00 |
| rRNA   | LSU-rRNA_Hsa-L63           | 4.97  | 0.07  | 0.33 | 1.00 |
| scRNA  | HY4-L110                   | 1.99  | -0.05 | 0.33 | 1.00 |
| rRNA   | LSU-rRNA_Hsa-L367          | 7.90  | -0.01 | 0.33 | 1.00 |
| mir-5p | hsa-miR-654-5p             | 3.09  | -0.04 | 0.34 | 1.00 |
| tRF3   | chr19.tRNA9-PseudoTTT-tRF3 | 1.65  | -0.05 | 0.34 | 1.00 |
| mir-3p | hsa-miR-340-3p             | 4.29  | -0.02 | 0.34 | 1.00 |
| rRNA   | 5S-L935                    | 2.94  | -0.03 | 0.34 | 1.00 |
| snRNA  | U2-L550                    | 2.12  | 0.05  | 0.34 | 1.00 |
| rRNA   | LSU-rRNA_Hsa-L275          | 5.54  | -0.02 | 0.34 | 1.00 |
| mir-5p | hsa-miR-194-5p             | 4.46  | -0.02 | 0.34 | 1.00 |

|            |                            |       |       |      |      |
|------------|----------------------------|-------|-------|------|------|
| scRNA      | HY4-L102                   | 8.16  | 0.01  | 0.34 | 1.00 |
| scRNA      | HY4-L69                    | 9.89  | 0.01  | 0.34 | 1.00 |
| snoRNA     | U24                        | 2.09  | -0.04 | 0.34 | 1.00 |
| tRF5       | chr8.tRNA12-TyrGTA-tRF5    | 2.21  | 0.05  | 0.34 | 1.00 |
| rRNA       | LSU-rRNA_Hsa-L73           | 2.19  | 0.03  | 0.34 | 1.00 |
| mir-5p     | hsa-miR-191-5p             | 8.87  | -0.01 | 0.34 | 1.00 |
| piRNA      | piR-35548-L3               | 2.78  | -0.03 | 0.34 | 1.00 |
| snRNA      | U2-L1074                   | 3.33  | 0.04  | 0.34 | 1.00 |
| tRF5       | chr17.tRNA33-PseudoTTG-tRF | 5.92  | -0.02 | 0.34 | 1.00 |
| mir-5p3pno | hsa-miR-548e               | 2.60  | -0.03 | 0.35 | 1.00 |
| rRNA       | 5S-L1217                   | 1.70  | -0.04 | 0.35 | 1.00 |
| rRNA       | LSU-rRNA_Hsa-L409          | 4.71  | -0.02 | 0.35 | 1.00 |
| mir-5p3pno | hsa-miR-1-L2               | 4.82  | -0.02 | 0.35 | 1.00 |
| rRNA       | SSU-rRNA_Hsa-L16           | 6.78  | 0.02  | 0.35 | 1.00 |
| mir-5p     | hsa-miR-126-5p             | 6.05  | -0.02 | 0.35 | 1.00 |
| rRNA       | 5S-L829                    | 2.65  | 0.03  | 0.35 | 1.00 |
| scRNA      | HY4-L146                   | 1.61  | 0.03  | 0.35 | 1.00 |
| mir-5p3pno | hsa-miR-95                 | 2.72  | 0.02  | 0.35 | 1.00 |
| rRNA       | 5S-L1009                   | 2.50  | 0.03  | 0.35 | 1.00 |
| piRNA      | piR-52041                  | 1.91  | 0.03  | 0.35 | 1.00 |
| snoRNA     | U95                        | 6.95  | -0.02 | 0.35 | 1.00 |
| rRNA       | 5S-L397                    | 1.55  | 0.03  | 0.35 | 1.00 |
| piRNA      | piR-37525                  | 1.54  | -0.04 | 0.36 | 1.00 |
| scRNA      | BC200-L72                  | 1.58  | 0.05  | 0.36 | 1.00 |
| piRNA      | piR-31638-L3               | 7.00  | -0.02 | 0.36 | 1.00 |
| scRNA      | HY4-L142                   | 3.10  | 0.02  | 0.36 | 1.00 |
| mir-3p     | hsa-miR-23a-3p             | 6.59  | -0.02 | 0.36 | 1.00 |
| mir-5p     | hsa-miR-27a-5p             | 4.98  | 0.02  | 0.36 | 1.00 |
| scRNA      | HY4-L127                   | 11.00 | 0.01  | 0.36 | 1.00 |
| tRNA       | chr1.tRNA128-LysCTT        | 3.24  | -0.02 | 0.36 | 1.00 |
| scRNA      | BC200-L151                 | 2.08  | -0.03 | 0.36 | 1.00 |
| rRNA       | LSU-rRNA_Hsa-L348          | 1.92  | 0.03  | 0.36 | 1.00 |
| scRNA      | HY1-L279                   | 4.02  | 0.02  | 0.36 | 1.00 |
| snoRNA     | U3-4                       | 7.31  | -0.02 | 0.36 | 1.00 |
| mir-5p     | hsa-miR-20a-5p             | 7.17  | -0.02 | 0.36 | 1.00 |
| scRNA      | HY4-L18                    | 1.43  | -0.03 | 0.36 | 1.00 |
| piRNA      | piR-44984-L6               | 2.42  | 0.03  | 0.37 | 1.00 |
| mir-5p     | hsa-miR-3606-5p            | 2.63  | 0.06  | 0.37 | 1.00 |
| scRNA      | BC200-L93                  | 1.59  | -0.04 | 0.37 | 1.00 |
| rRNA       | LSU-rRNA_Hsa-L144          | 1.61  | 0.03  | 0.37 | 1.00 |
| mir-3p     | hsa-miR-29b-3p             | 2.25  | -0.03 | 0.37 | 1.00 |
| tRNA       | chr2.tRNA27-GlyCCC         | 8.80  | -0.02 | 0.37 | 1.00 |
| rRNA       | LSU-rRNA_Hsa-L211          | 1.63  | -0.04 | 0.37 | 1.00 |

|            |                           |       |       |      |      |
|------------|---------------------------|-------|-------|------|------|
| mir-5p3pno | hsa-miR-618               | 2.72  | 0.03  | 0.37 | 1.00 |
| scRNA      | HY3-L140                  | 2.64  | -0.03 | 0.37 | 1.00 |
| mir-5p     | hsa-miR-424-5p            | 2.86  | -0.03 | 0.37 | 1.00 |
| mir-3p     | hsa-miR-21-3p             | 1.95  | -0.04 | 0.37 | 1.00 |
| scRNA      | HY3-L372                  | 2.47  | -0.03 | 0.37 | 1.00 |
| snRNA      | U14-L3                    | 1.49  | -0.04 | 0.37 | 1.00 |
| piRNA      | piR-43995-L4              | 6.52  | 0.02  | 0.37 | 1.00 |
| snRNA      | U2-L240                   | 3.38  | 0.04  | 0.38 | 1.00 |
| rRNA       | LSU-rRNA_Hsa-L305         | 5.25  | -0.02 | 0.38 | 1.00 |
| mir-5p     | hsa-miR-155-5p            | 4.35  | 0.01  | 0.38 | 1.00 |
| scRNA      | HY4-L126                  | 3.61  | 0.02  | 0.38 | 1.00 |
| rRNA       | LSU-rRNA_Hsa-L382         | 13.70 | -0.01 | 0.38 | 1.00 |
| tRF3       | chr16.tRNA31-PseudoTGG-tR | 1.95  | 0.03  | 0.38 | 1.00 |
| scRNA      | HY1-L124                  | 1.84  | 0.03  | 0.38 | 1.00 |
| tRF5       | chr14.tRNA8-CysGCA-tRF5   | 2.18  | -0.04 | 0.38 | 1.00 |
| scRNA      | HY1-L28                   | 1.58  | 0.03  | 0.38 | 1.00 |
| mir-5p     | hsa-miR-5010-5p           | 1.44  | 0.04  | 0.38 | 1.00 |
| mir-3p     | hsa-miR-199b-3p           | 7.58  | -0.02 | 0.38 | 1.00 |
| rRNA       | LSU-rRNA_Hsa-L333         | 4.08  | -0.02 | 0.38 | 1.00 |
| tRNA       | chr6.tRNA77-GluCTC        | 4.25  | 0.02  | 0.38 | 1.00 |
| mir-5p     | hsa-miR-629-5p            | 7.76  | 0.01  | 0.38 | 1.00 |
| scRNA      | BC200-L159                | 1.51  | -0.04 | 0.38 | 1.00 |
| mir-5p     | hsa-miR-7-5p-L3           | 1.44  | 0.04  | 0.38 | 1.00 |
| scRNA      | HY4-L10                   | 10.20 | 0.01  | 0.38 | 1.00 |
| snoRNA     | U58A                      | 5.02  | -0.03 | 0.38 | 1.00 |
| scRNA      | HY3-L479                  | 2.10  | 0.04  | 0.39 | 1.00 |
| snRNA      | U2-L161                   | 12.39 | 0.03  | 0.39 | 1.00 |
| scRNA      | HY4-L34                   | 1.71  | -0.03 | 0.39 | 1.00 |
| snoRNA     | U38A                      | 4.22  | -0.03 | 0.39 | 1.00 |
| piRNA      | piR-61174                 | 1.23  | 0.04  | 0.39 | 1.00 |
| tRNA       | chr6.tRNA131-GlnCTG       | 1.62  | 0.03  | 0.39 | 1.00 |
| scRNA      | HY1-L260                  | 4.88  | 0.02  | 0.39 | 1.00 |
| tRNA       | chr2.tRNA11-PseudoTTG     | 6.71  | 0.02  | 0.39 | 1.00 |
| mir-5p3pno | hsa-miR-103b-L2           | 3.90  | -0.02 | 0.39 | 1.00 |
| snRNA      | U2-L388                   | 3.41  | 0.02  | 0.39 | 1.00 |
| rRNA       | LSU-rRNA_Hsa-L389         | 10.71 | -0.02 | 0.39 | 1.00 |
| piRNA      | piR-33082                 | 7.18  | -0.02 | 0.39 | 1.00 |
| rRNA       | SSU-rRNA_Hsa-L72          | 14.26 | -0.01 | 0.39 | 1.00 |
| mir-5p     | hsa-miR-1292-5p           | 1.70  | -0.03 | 0.39 | 1.00 |
| mir-3p     | hsa-miR-30c-2-3p          | 1.38  | -0.04 | 0.40 | 1.00 |
| scRNA      | HY1-L326                  | 1.43  | 0.03  | 0.40 | 1.00 |
| rRNA       | 5S-L731                   | 1.51  | -0.03 | 0.40 | 1.00 |
| snRNA      | U2-L128                   | 7.39  | 0.02  | 0.40 | 1.00 |

|            |                        |       |       |      |      |
|------------|------------------------|-------|-------|------|------|
| mir-5p     | hsa-miR-548ay-5p       | 2.18  | -0.03 | 0.40 | 1.00 |
| snRNA      | U2-L386                | 2.89  | 0.04  | 0.40 | 1.00 |
| rRNA       | LSU-rRNA_Hsa-L93       | 7.67  | -0.02 | 0.40 | 1.00 |
| tRNA       | chr6.tRNA84-GlnTTG     | 1.52  | -0.04 | 0.40 | 1.00 |
| scRNA      | HY1-L111               | 1.94  | 0.03  | 0.40 | 1.00 |
| scRNA      | HY4-L72                | 7.28  | 0.01  | 0.40 | 1.00 |
| scRNA      | HY4-L136               | 2.51  | 0.03  | 0.40 | 1.00 |
| mir-5p     | hsa-miR-425-5p         | 5.12  | -0.02 | 0.40 | 1.00 |
| rRNA       | 5S-L78                 | 2.70  | 0.02  | 0.41 | 1.00 |
| scRNA      | HY4-L149               | 1.76  | 0.03  | 0.41 | 1.00 |
| mir-5p     | hsa-let-7e-5p          | 5.52  | -0.02 | 0.41 | 1.00 |
| piRNA      | piR-41209-L2           | 3.72  | -0.02 | 0.41 | 1.00 |
| scRNA      | HY4-L99                | 1.47  | -0.03 | 0.41 | 1.00 |
| mir-5p     | hsa-miR-6723-5p        | 4.58  | -0.02 | 0.41 | 1.00 |
| scRNA      | HY4-L92                | 1.42  | 0.03  | 0.41 | 1.00 |
| mir-5p     | hsa-miR-17-5p          | 5.08  | -0.02 | 0.41 | 1.00 |
| tRNA       | chr1.tRNA102-PseudoTTC | 6.55  | 0.01  | 0.41 | 1.00 |
| piRNA      | piR-36499              | 1.68  | -0.03 | 0.41 | 1.00 |
| mir-3p     | hsa-miR-363-3p         | 7.85  | -0.02 | 0.41 | 1.00 |
| tRNA       | chr8.tRNA5-TyrGTA      | 1.91  | -0.05 | 0.41 | 1.00 |
| mir-3p     | hsa-miR-323b-3p        | 3.62  | -0.03 | 0.41 | 1.00 |
| rRNA       | 5S-L1070               | 1.47  | -0.03 | 0.41 | 1.00 |
| rRNA       | LSU-rRNA_Hsa-L60       | 12.44 | 0.02  | 0.42 | 1.00 |
| rRNA       | LSU-rRNA_Hsa-L19       | 2.10  | 0.03  | 0.42 | 1.00 |
| mir-5p     | hsa-miR-26b-5p         | 8.15  | -0.01 | 0.42 | 1.00 |
| scRNA      | HY3-L478               | 8.12  | -0.01 | 0.42 | 1.00 |
| mir-5p     | hsa-miR-432-5p         | 5.13  | -0.02 | 0.42 | 1.00 |
| mir-5p     | hsa-miR-454-5p         | 2.36  | -0.02 | 0.42 | 1.00 |
| scRNA      | HY4-L66                | 7.15  | 0.01  | 0.42 | 1.00 |
| snRNA      | U1-L47                 | 1.98  | 0.03  | 0.42 | 1.00 |
| tRNA       | chr17.tRNA2-LysTTT     | 3.04  | -0.03 | 0.42 | 1.00 |
| mir-5p     | hsa-miR-550a-5p-L2     | 3.39  | -0.02 | 0.42 | 1.00 |
| mir-3p     | hsa-miR-3158-3p        | 3.71  | -0.02 | 0.42 | 1.00 |
| mir-5p     | hsa-miR-186-5p         | 6.23  | -0.02 | 0.42 | 1.00 |
| scRNA      | HY1-L419               | 3.95  | 0.02  | 0.42 | 1.00 |
| tRNA       | chr1.tRNA15-GlnCTG     | 2.98  | -0.02 | 0.42 | 1.00 |
| snoRNA     | U57                    | 4.69  | -0.02 | 0.42 | 1.00 |
| scRNA      | BC200-L95              | 3.20  | 0.03  | 0.42 | 1.00 |
| tRF3       | chr9.tRNA6-AspGTC-tRF3 | 1.45  | -0.03 | 0.42 | 1.00 |
| mir-5p3pno | hsa-miR-3138           | 1.71  | 0.04  | 0.42 | 1.00 |
| mir-3p     | hsa-miR-361-3p         | 7.04  | 0.01  | 0.42 | 1.00 |
| mir-3p     | hsa-miR-1185-1-3p      | 2.25  | -0.03 | 0.42 | 1.00 |
| tRNA       | chr1.tRNA4-GlyCCC      | 5.56  | 0.02  | 0.42 | 1.00 |

|            |                         |       |       |      |      |
|------------|-------------------------|-------|-------|------|------|
| snRNA      | U1-L63                  | 2.53  | 0.03  | 0.42 | 1.00 |
| snoRNA     | U8-L17                  | 2.67  | -0.03 | 0.42 | 1.00 |
| mir-5p3pno | hsa-miR-433             | 3.46  | -0.03 | 0.42 | 1.00 |
| scRNA      | HY4-L107                | 9.96  | 0.01  | 0.42 | 1.00 |
| piRNA      | piR-33151-L4            | 4.06  | 0.02  | 0.42 | 1.00 |
| snRNA      | U2-L887                 | 6.32  | 0.03  | 0.42 | 1.00 |
| mir-5p     | hsa-miR-93-5p           | 7.11  | -0.01 | 0.43 | 1.00 |
| piRNA      | piR-34536               | 5.56  | 0.02  | 0.43 | 1.00 |
| tRF3       | chr22.tRNA1-SeCTCA-tRF3 | 4.56  | 0.03  | 0.43 | 1.00 |
| scRNA      | HY4-L49                 | 1.27  | 0.03  | 0.43 | 1.00 |
| scRNA      | HY4-L153                | 8.62  | 0.01  | 0.43 | 1.00 |
| tRNA       | chr6.tRNA148-SerTGA     | 3.56  | 0.03  | 0.43 | 1.00 |
| rRNA       | LSU-rRNA_Hsa-L203       | 5.91  | -0.02 | 0.43 | 1.00 |
| snoRNA     | SNORD125                | 1.68  | -0.04 | 0.43 | 1.00 |
| tRNA       | chr14.tRNA23-ProAGG     | 2.14  | 0.03  | 0.43 | 1.00 |
| snoRNA     | ACA3-2                  | 2.59  | -0.03 | 0.43 | 1.00 |
| scRNA      | HY1-L295                | 4.37  | 0.02  | 0.43 | 1.00 |
| piRNA      | piR-44716               | 4.74  | -0.05 | 0.43 | 1.00 |
| rRNA       | SSU-rRNA_Hsa-L33        | 12.79 | -0.01 | 0.43 | 1.00 |
| snoRNA     | HBII-85-15              | 1.65  | -0.04 | 0.43 | 1.00 |
| mir-5p     | hsa-miR-423-5p          | 3.96  | -0.01 | 0.43 | 1.00 |
| piRNA      | piR-57516               | 5.25  | -0.02 | 0.43 | 1.00 |
| rRNA       | LSU-rRNA_Hsa-L252       | 2.99  | -0.02 | 0.43 | 1.00 |
| scRNA      | BC200-L67               | 4.18  | 0.02  | 0.43 | 1.00 |
| mir-3p     | hsa-miR-195-3p          | 1.91  | 0.03  | 0.44 | 1.00 |
| rRNA       | LSU-rRNA_Hsa-L164       | 5.97  | -0.01 | 0.44 | 1.00 |
| snoRNA     | U36A                    | 1.72  | -0.04 | 0.44 | 1.00 |
| rRNA       | 5S-L790                 | 4.09  | 0.02  | 0.44 | 1.00 |
| piRNA      | piR-35982-L11           | 1.95  | 0.05  | 0.44 | 1.00 |
| tRNA       | chr2.tRNA22-PseudoTTG   | 3.03  | 0.02  | 0.44 | 1.00 |
| rRNA       | 5S-L194                 | 2.89  | 0.02  | 0.44 | 1.00 |
| scRNA      | BC200-L29               | 2.92  | -0.03 | 0.44 | 1.00 |
| piRNA      | piR-60576-L6            | 8.04  | 0.02  | 0.44 | 1.00 |
| tRNA       | chr2.tRNA23-GlnTTG      | 3.06  | 0.03  | 0.44 | 1.00 |
| scRNA      | BC200-L82               | 1.75  | 0.03  | 0.44 | 1.00 |
| rRNA       | LSU-rRNA_Hsa-L220       | 4.41  | -0.02 | 0.44 | 1.00 |
| snoRNA     | U91                     | 2.24  | -0.04 | 0.44 | 1.00 |
| rRNA       | LSU-rRNA_Hsa-L174       | 1.61  | -0.03 | 0.44 | 1.00 |
| scRNA      | HY1-L45                 | 1.90  | -0.03 | 0.44 | 1.00 |
| mir-5p     | hsa-miR-145-5p          | 1.79  | -0.03 | 0.44 | 1.00 |
| scRNA      | HY1-L259                | 5.48  | 0.01  | 0.45 | 1.00 |
| rRNA       | LSU-rRNA_Hsa-L375       | 10.09 | -0.02 | 0.45 | 1.00 |
| mir-5p3pno | hsa-miR-326             | 1.98  | 0.02  | 0.45 | 1.00 |

|            |                        |       |       |      |      |
|------------|------------------------|-------|-------|------|------|
| mir-5p3pno | hsa-miR-328            | 4.07  | -0.02 | 0.45 | 1.00 |
| mir-5p3pno | hsa-miR-421            | 2.77  | -0.02 | 0.45 | 1.00 |
| scRNA      | HY4-L15                | 7.92  | 0.01  | 0.45 | 1.00 |
| tRNA       | chr6.tRNA152-ValCAC    | 8.52  | 0.01  | 0.45 | 1.00 |
| mir-5p3pno | hsa-miR-651            | 3.29  | -0.02 | 0.45 | 1.00 |
| piRNA      | piR-61648-L7           | 4.08  | -0.02 | 0.45 | 1.00 |
| tRNA       | chr16.tRNA22-MetCAT    | 3.03  | -0.02 | 0.45 | 1.00 |
| rRNA       | 5S-L1255               | 1.70  | -0.03 | 0.45 | 1.00 |
| rRNA       | 5S-L105                | 5.89  | 0.01  | 0.45 | 1.00 |
| piRNA      | piR-31068-L10          | 2.13  | -0.04 | 0.45 | 1.00 |
| snoRNA     | U58C                   | 3.37  | -0.03 | 0.45 | 1.00 |
| tRNA       | chr1.tRNA38-LeuCAG     | 3.68  | 0.02  | 0.45 | 1.00 |
| snoRNA     | HBI-43                 | 3.60  | -0.02 | 0.45 | 1.00 |
| rRNA       | 5S-L500                | 1.78  | -0.03 | 0.46 | 1.00 |
| snoRNA     | HBII-85-8              | 2.21  | -0.04 | 0.46 | 1.00 |
| mir-5p     | hsa-miR-766-5p         | 1.81  | -0.03 | 0.46 | 1.00 |
| snRNA      | U2-L981                | 4.06  | 0.03  | 0.46 | 1.00 |
| snoRNA     | U26                    | 8.56  | -0.02 | 0.46 | 1.00 |
| rRNA       | LSU-rRNA_Hsa-L346      | 1.67  | -0.02 | 0.46 | 1.00 |
| scRNA      | HY1-L184               | 3.77  | 0.01  | 0.46 | 1.00 |
| mir-3p     | hsa-miR-222-3p         | 8.33  | -0.01 | 0.46 | 1.00 |
| snoRNA     | HBII-316               | 2.02  | -0.04 | 0.46 | 1.00 |
| tRNA       | chr17.tRNA5-GlyGCC     | 7.52  | 0.01  | 0.46 | 1.00 |
| tRNA       | chr6.tRNA73-ArgCCG     | 2.37  | 0.03  | 0.46 | 1.00 |
| mir-5p3pno | hsa-miR-2110           | 5.17  | -0.01 | 0.47 | 1.00 |
| snoRNA     | HBII-420               | 4.25  | -0.03 | 0.47 | 1.00 |
| scRNA      | HY4-L162               | 1.65  | 0.02  | 0.47 | 1.00 |
| rRNA       | LSU-rRNA_Hsa-L365      | 1.60  | 0.03  | 0.47 | 1.00 |
| mir-3p     | hsa-miR-30e-3p         | 8.45  | 0.01  | 0.47 | 1.00 |
| scRNA      | HY4-L54                | 6.72  | 0.01  | 0.47 | 1.00 |
| snRNA      | U7-L212                | 2.30  | -0.03 | 0.47 | 1.00 |
| tRF5       | chr4.tRNA3-CysGCA-tRF5 | 1.61  | 0.03  | 0.47 | 1.00 |
| tRNA       | chr6.tRNA75-MetCAT     | 1.36  | -0.04 | 0.47 | 1.00 |
| mir-5p     | hsa-miR-185-5p         | 8.24  | -0.02 | 0.47 | 1.00 |
| mir-3p     | hsa-miR-92a-3p         | 11.39 | -0.01 | 0.47 | 1.00 |
| scRNA      | HY1-L69                | 4.11  | 0.02  | 0.48 | 1.00 |
| mir-5p3pno | hsa-miR-410            | 1.74  | -0.04 | 0.48 | 1.00 |
| mir-3p     | hsa-let-7b-3p          | 3.86  | 0.01  | 0.48 | 1.00 |
| scRNA      | HY1-L208               | 3.29  | 0.02  | 0.48 | 1.00 |
| piRNA      | piR-32678              | 6.09  | -0.01 | 0.48 | 1.00 |
| scRNA      | HY1-L414               | 1.30  | 0.03  | 0.48 | 1.00 |
| scRNA      | HY1-L273               | 1.90  | -0.02 | 0.48 | 1.00 |
| mir-5p     | hsa-miR-3074-5p        | 9.31  | -0.01 | 0.49 | 1.00 |

|            |                             |       |       |      |      |
|------------|-----------------------------|-------|-------|------|------|
| mir-5p3pno | hsa-miR-760                 | 2.38  | 0.02  | 0.49 | 1.00 |
| mir-5p3pno | hsa-miR-206                 | 2.36  | 0.04  | 0.49 | 1.00 |
| rRNA       | SSU-rRNA_Hsa-L30            | 11.12 | 0.01  | 0.49 | 1.00 |
| scRNA      | BC200-L88                   | 1.65  | -0.03 | 0.49 | 1.00 |
| tRNA       | chr6.tRNA128-GlyGCC         | 4.35  | -0.01 | 0.49 | 1.00 |
| tRF5       | chr1.tRNA109-PseudoGTT-tRF5 | 1.70  | -0.03 | 0.49 | 1.00 |
| rRNA       | 5S-L107                     | 10.07 | -0.01 | 0.49 | 1.00 |
| tRF5       | chr11.tRNA16-ValTAC-tRF5    | 1.57  | 0.03  | 0.49 | 1.00 |
| tRNA       | chr5.tRNA6-ValCAC           | 10.69 | 0.01  | 0.49 | 1.00 |
| tRNA       | chr16.tRNA19-GlyGCC         | 1.88  | 0.04  | 0.49 | 1.00 |
| scRNA      | HY5-L9                      | 1.40  | 0.02  | 0.49 | 1.00 |
| snRNA      | U1-L45                      | 6.78  | 0.02  | 0.49 | 1.00 |
| mir-5p     | hsa-miR-199b-5p             | 2.97  | 0.03  | 0.49 | 1.00 |
| mir-3p     | hsa-miR-140-3p              | 9.02  | -0.01 | 0.49 | 1.00 |
| scRNA      | HY4-L43                     | 2.22  | 0.02  | 0.49 | 1.00 |
| snoRNA     | U16                         | 2.75  | -0.03 | 0.50 | 1.00 |
| tRF3       | chr10.tRNA2-SerTGA-tRF3     | 2.00  | -0.03 | 0.50 | 1.00 |
| scRNA      | HY4-L56                     | 1.82  | -0.02 | 0.50 | 1.00 |
| mir-3p     | hsa-miR-22-3p               | 10.18 | -0.01 | 0.50 | 1.00 |
| tRF5       | chr3.tRNA5-LeuAAG-tRF5      | 3.59  | -0.01 | 0.50 | 1.00 |
| mir-5p3pno | hsa-miR-3672                | 1.53  | -0.03 | 0.50 | 1.00 |
| mir-3p     | hsa-miR-654-3p              | 3.75  | -0.02 | 0.50 | 1.00 |
| scRNA      | HY4-L41                     | 1.86  | 0.02  | 0.50 | 1.00 |
| tRNA       | chr1.tRNA18-PseudoCCT       | 1.66  | 0.03  | 0.50 | 1.00 |
| mir-5p     | hsa-miR-27b-5p              | 1.72  | -0.03 | 0.50 | 1.00 |
| scRNA      | BC200-L146                  | 2.61  | -0.02 | 0.51 | 1.00 |
| mir-5p     | hsa-let-7d-5p               | 8.11  | -0.01 | 0.51 | 1.00 |
| tRNA       | chr6.tRNA175-SerGCT         | 2.06  | 0.04  | 0.51 | 1.00 |
| mir-3p     | hsa-miR-1306-3p             | 2.00  | -0.03 | 0.51 | 1.00 |
| snRNA      | U4-L41                      | 2.29  | -0.03 | 0.51 | 1.00 |
| scRNA      | BC200-L154                  | 1.41  | -0.03 | 0.51 | 1.00 |
| snRNA      | U4-L40                      | 2.99  | -0.02 | 0.51 | 1.00 |
| tRNA       | chr5.tRNA4-ValAAC           | 2.29  | -0.02 | 0.51 | 1.00 |
| rRNA       | LSU-rRNA_Hsa-L295           | 3.46  | -0.02 | 0.51 | 1.00 |
| tRF3       | chr2.tRNA21-SerTGA-tRF3     | 2.33  | -0.03 | 0.51 | 1.00 |
| rRNA       | LSU-rRNA_Hsa-L212           | 3.25  | -0.01 | 0.51 | 1.00 |
| scRNA      | BC200-L117                  | 1.83  | 0.03  | 0.51 | 1.00 |
| scRNA      | HY3-L239                    | 1.81  | 0.03  | 0.51 | 1.00 |
| tRNA       | chr19.tRNA8-SeCTCA          | 5.86  | 0.01  | 0.51 | 1.00 |
| rRNA       | LSU-rRNA_Hsa-L384           | 14.09 | -0.01 | 0.52 | 1.00 |
| tRF5       | chr6.tRNA129-MetCAT-tRF5    | 2.00  | -0.02 | 0.52 | 1.00 |
| scRNA      | HY3-L512                    | 2.05  | 0.03  | 0.52 | 1.00 |
| rRNA       | 5S-L986                     | 1.69  | -0.03 | 0.52 | 1.00 |



|            |                            |       |       |      |      |
|------------|----------------------------|-------|-------|------|------|
| tRF3       | chr20.tRNA4-PseudoTAA-tRF3 | 4.75  | -0.01 | 0.52 | 1.00 |
| scRNA      | BC200-L43                  | 3.28  | -0.02 | 0.52 | 1.00 |
| tRNA       | chr14.tRNA19-TyrGTA        | 2.52  | -0.02 | 0.52 | 1.00 |
| scRNA      | HY1-L223                   | 6.19  | 0.01  | 0.52 | 1.00 |
| rRNA       | 5S-L558                    | 7.28  | 0.01  | 0.52 | 1.00 |
| rRNA       | 5S-L357                    | 2.11  | -0.02 | 0.52 | 1.00 |
| tRNA       | chr1.tRNA64-GluTTC         | 7.89  | 0.01  | 0.52 | 1.00 |
| mir-5p     | hsa-miR-28-5p              | 5.11  | -0.01 | 0.52 | 1.00 |
| piRNA      | piR-33382-L2               | 2.24  | 0.03  | 0.52 | 1.00 |
| rRNA       | 5S-L363                    | 1.50  | 0.02  | 0.52 | 1.00 |
| snoRNA     | U56                        | 2.63  | -0.03 | 0.52 | 1.00 |
| mir-5p3pno | hsa-miR-134                | 6.74  | -0.02 | 0.52 | 1.00 |
| mir-5p     | hsa-miR-30b-5p             | 2.47  | 0.02  | 0.52 | 1.00 |
| scRNA      | BC200-L149                 | 1.76  | 0.03  | 0.52 | 1.00 |
| scRNA      | BC200-L8                   | 2.74  | -0.02 | 0.52 | 1.00 |
| rRNA       | SSU-rRNA_Hsa-L34           | 5.52  | -0.01 | 0.52 | 1.00 |
| mir-3p     | hsa-miR-185-3p             | 2.98  | -0.02 | 0.52 | 1.00 |
| mir-5p     | hsa-miR-30d-5p             | 10.84 | -0.01 | 0.53 | 1.00 |
| scRNA      | BC200-L10                  | 2.65  | -0.02 | 0.53 | 1.00 |
| rRNA       | SSU-rRNA_Hsa-L25           | 4.08  | 0.01  | 0.53 | 1.00 |
| snoRNA     | U46                        | 4.48  | -0.02 | 0.53 | 1.00 |
| piRNA      | piR-43325-L7               | 3.82  | -0.02 | 0.53 | 1.00 |
| scRNA      | HY1-L100                   | 8.91  | 0.01  | 0.53 | 1.00 |
| rRNA       | LSU-rRNA_Hsa-L202          | 3.79  | -0.02 | 0.53 | 1.00 |
| scRNA      | HY4-L97                    | 8.74  | 0.01  | 0.53 | 1.00 |
| mir-3p     | hsa-miR-16-2-3p            | 7.97  | -0.01 | 0.53 | 1.00 |
| snRNA      | U2-L479                    | 1.54  | 0.03  | 0.53 | 1.00 |
| mir-5p3pno | hsa-miR-1299               | 2.07  | -0.03 | 0.53 | 1.00 |
| tRNA       | chr17.tRNA20-MetCAT        | 1.87  | -0.03 | 0.53 | 1.00 |
| scRNA      | HY1-L442                   | 1.33  | -0.03 | 0.53 | 1.00 |
| mir-3p     | hsa-miR-26b-3p             | 2.34  | -0.03 | 0.54 | 1.00 |
| mir-5p3pno | hsa-miR-1250               | 1.50  | 0.02  | 0.54 | 1.00 |
| mir-5p     | hsa-miR-32-5p              | 3.62  | 0.02  | 0.54 | 1.00 |
| rRNA       | 5S-L782                    | 3.63  | 0.01  | 0.54 | 1.00 |
| scRNA      | HY4-L132                   | 2.50  | -0.02 | 0.54 | 1.00 |
| rRNA       | 5S-L995                    | 3.46  | -0.03 | 0.54 | 1.00 |
| rRNA       | LSU-rRNA_Hsa-L150          | 3.40  | -0.01 | 0.54 | 1.00 |
| snoRNA     | U36B                       | 1.73  | -0.03 | 0.54 | 1.00 |
| tRNA       | chr2.tRNA2-TyrGTA          | 1.69  | -0.03 | 0.54 | 1.00 |
| scRNA      | HY1-L155                   | 2.69  | 0.02  | 0.54 | 1.00 |
| mir-5p     | hsa-miR-450b-5p            | 5.25  | 0.01  | 0.54 | 1.00 |
| rRNA       | 5S-L1152                   | 1.59  | -0.02 | 0.54 | 1.00 |
| scRNA      | HY3-L359                   | 1.92  | -0.03 | 0.54 | 1.00 |

|            |                            |      |       |      |      |
|------------|----------------------------|------|-------|------|------|
| rRNA       | 5S-L115                    | 1.96 | 0.02  | 0.54 | 1.00 |
| rRNA       | 5S-L126                    | 2.55 | 0.02  | 0.55 | 1.00 |
| scRNA      | HY5-L7                     | 2.29 | 0.02  | 0.55 | 1.00 |
| scRNA      | HY1-L114                   | 3.94 | 0.01  | 0.55 | 1.00 |
| tRNA       | chr16.tRNA25-GlyGCC        | 4.78 | -0.01 | 0.55 | 1.00 |
| snRNA      | U2-L532                    | 3.08 | 0.03  | 0.55 | 1.00 |
| snRNA      | U2-L1001                   | 2.25 | -0.02 | 0.55 | 1.00 |
| scRNA      | BC200-L129                 | 2.19 | 0.03  | 0.55 | 1.00 |
| mir-5p     | hsa-miR-1307-5p            | 1.42 | -0.02 | 0.55 | 1.00 |
| rRNA       | LSU-rRNA_Hsa-L387          | 9.35 | -0.01 | 0.55 | 1.00 |
| rRNA       | LSU-rRNA_Hsa-L51           | 4.19 | -0.02 | 0.55 | 1.00 |
| scRNA      | BC200-L91                  | 1.97 | 0.03  | 0.55 | 1.00 |
| rRNA       | LSU-rRNA_Hsa-L162          | 2.42 | -0.02 | 0.55 | 1.00 |
| mir-3p     | hsa-miR-423-3p             | 8.89 | -0.01 | 0.55 | 1.00 |
| mir-5p     | hsa-miR-369-5p             | 1.73 | -0.03 | 0.56 | 1.00 |
| scRNA      | HY1-L280                   | 2.44 | 0.02  | 0.56 | 1.00 |
| rRNA       | LSU-rRNA_Hsa-L366          | 4.93 | -0.02 | 0.56 | 1.00 |
| piRNA      | piR-33650                  | 3.04 | -0.02 | 0.56 | 1.00 |
| tRF3       | chr18.tRNA2-PseudoTCC-tRF3 | 3.09 | -0.02 | 0.56 | 1.00 |
| rRNA       | 5S-L804                    | 4.97 | 0.01  | 0.56 | 1.00 |
| rRNA       | 5S-L1270                   | 1.27 | -0.02 | 0.56 | 1.00 |
| snRNA      | U2-L782                    | 2.99 | -0.02 | 0.56 | 1.00 |
| mir-5p3pno | hsa-miR-942                | 3.31 | 0.02  | 0.56 | 1.00 |
| tRF3       | chr14.tRNA14-GluTTC-tRF3   | 2.02 | 0.04  | 0.56 | 1.00 |
| scRNA      | HY1-L183                   | 2.44 | 0.01  | 0.56 | 1.00 |
| scRNA      | HY1                        | 6.00 | 0.01  | 0.56 | 1.00 |
| piRNA      | piR-30890                  | 3.30 | 0.02  | 0.56 | 1.00 |
| mir-3p     | hsa-miR-136-3p             | 2.62 | -0.02 | 0.57 | 1.00 |
| mir-5p     | hsa-miR-3613-5p            | 4.64 | -0.01 | 0.57 | 1.00 |
| mir-5p     | hsa-miR-550a-3-5p          | 1.55 | -0.02 | 0.57 | 1.00 |
| snoRNA     | HBII-85-10                 | 1.77 | 0.02  | 0.57 | 1.00 |
| tRNA       | chr15.tRNA4-ArgTCG         | 2.60 | -0.02 | 0.57 | 1.00 |
| scRNA      | HY3-L159                   | 3.19 | 0.02  | 0.57 | 1.00 |
| scRNA      | HY4-L12                    | 5.27 | 0.01  | 0.57 | 1.00 |
| snoRNA     | ACA21                      | 2.76 | 0.02  | 0.57 | 1.00 |
| snoRNA     | U83A                       | 3.52 | -0.02 | 0.57 | 1.00 |
| mir-5p     | hsa-miR-3173-5p            | 2.41 | 0.02  | 0.57 | 1.00 |
| rRNA       | LSU-rRNA_Hsa-L345          | 2.84 | 0.02  | 0.57 | 1.00 |
| scRNA      | BC200-L101                 | 1.85 | -0.03 | 0.57 | 1.00 |
| scRNA      | BC200-L31                  | 1.42 | -0.03 | 0.57 | 1.00 |
| mir-5p     | hsa-miR-146b-5p            | 7.71 | -0.01 | 0.57 | 1.00 |
| mir-5p3pno | hsa-let-7c-L2              | 5.48 | 0.01  | 0.57 | 1.00 |
| rRNA       | 5S-L583                    | 2.68 | -0.03 | 0.57 | 1.00 |

|            |                             |       |       |      |      |
|------------|-----------------------------|-------|-------|------|------|
| scRNA      | HY1-L356                    | 4.04  | -0.01 | 0.58 | 1.00 |
| scRNA      | HY3-L62                     | 1.84  | -0.03 | 0.58 | 1.00 |
| mir-5p3pno | hsa-miR-1244-L2             | 1.66  | 0.03  | 0.58 | 1.00 |
| mir-5p     | hsa-miR-342-5p              | 6.55  | 0.01  | 0.58 | 1.00 |
| tRF3       | chr18.tRNA1-GluCTC-tRF3     | 2.27  | 0.03  | 0.58 | 1.00 |
| scRNA      | HY1-L287                    | 6.16  | 0.01  | 0.58 | 1.00 |
| mir-5p     | hsa-miR-505-5p              | 1.81  | -0.02 | 0.58 | 1.00 |
| mir-3p     | hsa-miR-151a-3p             | 11.62 | 0.01  | 0.58 | 1.00 |
| mir-3p     | hsa-miR-629-3p              | 1.42  | -0.02 | 0.58 | 1.00 |
| mir-3p     | hsa-miR-146b-3p             | 2.42  | 0.02  | 0.58 | 1.00 |
| scRNA      | HY1-L239                    | 4.37  | 0.01  | 0.58 | 1.00 |
| mir-5p     | hsa-miR-584-5p              | 7.31  | -0.01 | 0.58 | 1.00 |
| mir-5p     | hsa-miR-877-5p              | 2.35  | -0.02 | 0.58 | 1.00 |
| snoRNA     | U43                         | 4.95  | -0.02 | 0.58 | 1.00 |
| snRNA      | U1-L4                       | 8.27  | 0.02  | 0.58 | 1.00 |
| tRF3       | chr6.tRNA37-ValAAC-tRF3     | 12.93 | -0.02 | 0.58 | 1.00 |
| tRF5       | chr9.tRNA6-AspGTC-tRF5      | 2.90  | 0.02  | 0.58 | 1.00 |
| scRNA      | HY4-L130                    | 14.43 | 0.01  | 0.58 | 1.00 |
| tRNA       | chr17.tRNA23-ArgCCG         | 3.40  | 0.01  | 0.58 | 1.00 |
| mir-5p     | hsa-miR-96-5p               | 2.19  | -0.02 | 0.59 | 1.00 |
| tRNA       | chr1.tRNA81-AspGTC          | 4.35  | -0.02 | 0.59 | 1.00 |
| scRNA      | HY4-L42                     | 1.44  | -0.02 | 0.59 | 1.00 |
| mir-3p     | hsa-miR-17-3p               | 1.53  | -0.02 | 0.59 | 1.00 |
| rRNA       | 5S-L803                     | 7.74  | 0.01  | 0.59 | 1.00 |
| mir-3p     | hsa-miR-505-3p              | 2.00  | -0.02 | 0.59 | 1.00 |
| scRNA      | HY4-L28                     | 6.48  | 0.01  | 0.59 | 1.00 |
| mir-5p     | hsa-miR-30a-5p              | 7.14  | 0.01  | 0.60 | 1.00 |
| rRNA       | 5S-L101                     | 9.06  | 0.01  | 0.60 | 1.00 |
| tRF3       | chr17.tRNA33-PseudoTTG-tRF3 | 4.41  | -0.02 | 0.60 | 1.00 |
| piRNA      | piR-61648                   | 2.28  | 0.01  | 0.60 | 1.00 |
| piRNA      | piR-33151-L12               | 2.94  | -0.01 | 0.60 | 1.00 |
| scRNA      | HY1-L10                     | 1.55  | 0.02  | 0.60 | 1.00 |
| rRNA       | 5S-L61                      | 2.67  | 0.01  | 0.60 | 1.00 |
| piRNA      | piR-35468                   | 4.14  | -0.02 | 0.60 | 1.00 |
| scRNA      | HY3-L518                    | 8.30  | 0.01  | 0.60 | 1.00 |
| mir-5p     | hsa-miR-9-5p-L3             | 3.09  | 0.01  | 0.60 | 1.00 |
| scRNA      | BC200-L100                  | 1.69  | 0.03  | 0.60 | 1.00 |
| rRNA       | 5S-L621                     | 1.23  | 0.02  | 0.60 | 1.00 |
| mir-5p3pno | hsa-miR-548j                | 1.80  | -0.02 | 0.60 | 1.00 |
| snoRNA     | U29                         | 5.29  | -0.02 | 0.60 | 1.00 |
| scRNA      | HY4-L114                    | 2.44  | 0.02  | 0.60 | 1.00 |
| mir-3p     | hsa-miR-25-3p               | 12.18 | -0.01 | 0.60 | 1.00 |
| scRNA      | HY3-L272                    | 1.38  | 0.02  | 0.61 | 1.00 |

|            |                            |       |       |      |      |
|------------|----------------------------|-------|-------|------|------|
| rRNA       | LSU-rRNA_Hsa-L29           | 2.54  | 0.01  | 0.61 | 1.00 |
| scRNA      | BC200-L165                 | 1.54  | -0.02 | 0.61 | 1.00 |
| mir-3p     | hsa-miR-3913-3p            | 1.59  | -0.02 | 0.61 | 1.00 |
| scRNA      | HY4-L53                    | 3.75  | -0.01 | 0.61 | 1.00 |
| snRNA      | U2-L1058                   | 6.70  | 0.02  | 0.61 | 1.00 |
| scRNA      | HY1-L430                   | 1.34  | 0.02  | 0.61 | 1.00 |
| rRNA       | 5S-L815                    | 2.57  | 0.01  | 0.61 | 1.00 |
| tRNA       | chr2.tRNA25-PseudoCTC      | 8.69  | 0.01  | 0.61 | 1.00 |
| piRNA      | piR-36741-L2               | 1.62  | 0.02  | 0.61 | 1.00 |
| scRNA      | BC200-L167                 | 1.58  | 0.02  | 0.61 | 1.00 |
| tRNA       | chr6.tRNA30-ProCGG         | 10.88 | 0.01  | 0.61 | 1.00 |
| scRNA      | BC200-L116                 | 2.42  | -0.02 | 0.61 | 1.00 |
| scRNA      | BC200-L110                 | 1.47  | -0.02 | 0.61 | 1.00 |
| mir-3p     | hsa-miR-1307-3p            | 7.96  | -0.01 | 0.61 | 1.00 |
| mir-5p3pno | hsa-miR-1284               | 1.70  | 0.02  | 0.61 | 1.00 |
| tRF5       | chr1.tRNA90-ValCAC-tRF5    | 2.14  | 0.02  | 0.61 | 1.00 |
| tRNA       | chr17.tRNA18-ArgCCT        | 1.72  | 0.02  | 0.61 | 1.00 |
| tRF5       | chr17.tRNA31-AsnGTT-tRF5   | 2.92  | 0.02  | 0.61 | 1.00 |
| rRNA       | LSU-rRNA_Hsa-L151          | 3.13  | 0.02  | 0.61 | 1.00 |
| scRNA      | HY4-L11                    | 1.48  | 0.02  | 0.61 | 1.00 |
| rRNA       | LSU-rRNA_Hsa-L53           | 2.22  | -0.01 | 0.62 | 1.00 |
| tRNA       | chr12.tRNA11-PheGAA        | 1.77  | -0.03 | 0.62 | 1.00 |
| tRNA       | chr1.tRNA33-Pseudo???      | 3.32  | -0.01 | 0.62 | 1.00 |
| scRNA      | HY4-L58                    | 3.81  | -0.01 | 0.62 | 1.00 |
| piRNA      | piR-36707                  | 5.03  | 0.01  | 0.62 | 1.00 |
| mir-5p     | hsa-miR-193a-5p            | 5.17  | -0.01 | 0.62 | 1.00 |
| mir-5p     | hsa-miR-139-5p             | 6.03  | 0.01  | 0.62 | 1.00 |
| mir-3p     | hsa-miR-130a-3p            | 3.58  | -0.01 | 0.62 | 1.00 |
| rRNA       | 5S-L103                    | 3.03  | -0.02 | 0.62 | 1.00 |
| snoRNA     | ACA9                       | 1.70  | -0.02 | 0.62 | 1.00 |
| scRNA      | HY1-L192                   | 5.99  | 0.01  | 0.62 | 1.00 |
| scRNA      | BC200-L156                 | 2.60  | -0.01 | 0.62 | 1.00 |
| rRNA       | LSU-rRNA_Hsa-L189          | 4.24  | 0.01  | 0.62 | 1.00 |
| snoRNA     | ACA36B                     | 3.83  | 0.01  | 0.63 | 1.00 |
| piRNA      | piR-31447                  | 1.47  | 0.02  | 0.63 | 1.00 |
| rRNA       | 5S-L1068                   | 2.39  | 0.01  | 0.63 | 1.00 |
| rRNA       | 5S-L955                    | 1.52  | 0.01  | 0.63 | 1.00 |
| rRNA       | LSU-rRNA_Hsa-L381          | 2.74  | -0.02 | 0.63 | 1.00 |
| rRNA       | 5S-L930                    | 1.75  | 0.02  | 0.63 | 1.00 |
| mir-3p     | hsa-miR-197-3p             | 2.69  | -0.02 | 0.63 | 1.00 |
| tRNA       | chr16.tRNA10-LysCTT        | 4.96  | 0.01  | 0.63 | 1.00 |
| tRF5       | chr1.tRNA104-PseudoGTT-tRF | 2.69  | 0.02  | 0.63 | 1.00 |
| mir-3p     | hsa-miR-342-3p             | 3.63  | -0.01 | 0.63 | 1.00 |

|            |                            |       |       |      |      |
|------------|----------------------------|-------|-------|------|------|
| tRF5       | chrX.tRNA1-PseudoTTG-tRF5  | 2.77  | 0.02  | 0.63 | 1.00 |
| tRNA       | chr1.tRNA137-Pseudo???     | 6.02  | 0.01  | 0.63 | 1.00 |
| snoRNA     | HBII-251                   | 3.81  | -0.02 | 0.63 | 1.00 |
| scRNA      | HY1-L167                   | 2.48  | -0.02 | 0.63 | 1.00 |
| rRNA       | LSU-rRNA_Hsa-L341          | 1.93  | -0.02 | 0.63 | 1.00 |
| mir-5p     | hsa-miR-339-5p             | 1.85  | -0.02 | 0.63 | 1.00 |
| tRNA       | chr17.tRNA36-ThrAGT        | 2.02  | 0.02  | 0.63 | 1.00 |
| rRNA       | LSU-rRNA_Hsa-L339          | 2.35  | 0.02  | 0.64 | 1.00 |
| rRNA       | 5S-L108                    | 11.53 | 0.01  | 0.64 | 1.00 |
| snRNA      | U5-L67                     | 7.03  | -0.01 | 0.64 | 1.00 |
| tRNA       | chr1.tRNA119-LysCTT        | 7.12  | 0.01  | 0.64 | 1.00 |
| mir-3p     | hsa-miR-3184-3p            | 11.60 | 0.01  | 0.64 | 1.00 |
| piRNA      | piR-31068-L3               | 3.12  | 0.02  | 0.64 | 1.00 |
| snRNA      | U6-L9                      | 4.67  | 0.01  | 0.64 | 1.00 |
| snRNA      | U14-L2                     | 1.79  | -0.03 | 0.64 | 1.00 |
| piRNA      | piR-33468-L4               | 2.34  | 0.01  | 0.64 | 1.00 |
| piRNA      | piR-61647-L4               | 3.62  | 0.01  | 0.64 | 1.00 |
| mir-3p     | hsa-miR-486-3p             | 10.93 | 0.01  | 0.64 | 1.00 |
| tRF3       | chr15.tRNA6-PseudoCTT-tRF3 | 2.01  | -0.02 | 0.64 | 1.00 |
| snRNA      | U2-L302                    | 4.05  | 0.01  | 0.64 | 1.00 |
| tRF3       | chr3.tRNA6-CysGCA-tRF3     | 2.19  | 0.02  | 0.64 | 1.00 |
| mir-5p     | hsa-let-7g-5p              | 11.06 | -0.01 | 0.64 | 1.00 |
| rRNA       | 5S-L1014                   | 1.63  | 0.02  | 0.64 | 1.00 |
| rRNA       | LSU-rRNA_Hsa-L193          | 7.16  | -0.01 | 0.64 | 1.00 |
| tRNA       | chr12.tRNA4-AspGTC         | 4.64  | 0.01  | 0.64 | 1.00 |
| mir-3p     | hsa-miR-3529-3p            | 7.65  | -0.01 | 0.64 | 1.00 |
| scRNA      | HY4-L89                    | 8.76  | -0.01 | 0.65 | 1.00 |
| snRNA      | U2-L1061                   | 11.07 | 0.02  | 0.65 | 1.00 |
| mir-5p     | hsa-miR-98-5p              | 6.17  | -0.01 | 0.65 | 1.00 |
| mir-5p     | hsa-miR-148b-5p            | 2.86  | 0.01  | 0.65 | 1.00 |
| snRNA      | U2-L75                     | 4.87  | 0.02  | 0.65 | 1.00 |
| rRNA       | 5S-L137                    | 1.95  | 0.01  | 0.65 | 1.00 |
| mir-5p3pno | hsa-miR-4485               | 4.29  | -0.01 | 0.65 | 1.00 |
| mir-5p     | hsa-miR-589-5p             | 4.55  | 0.01  | 0.65 | 1.00 |
| snoRNA     | HBII-289                   | 7.18  | -0.01 | 0.65 | 1.00 |
| scRNA      | BC200-L54                  | 4.73  | 0.01  | 0.65 | 1.00 |
| scRNA      | HY1-L67                    | 6.00  | 0.01  | 0.65 | 1.00 |
| mir-3p     | hsa-miR-145-3p             | 4.84  | 0.01  | 0.65 | 1.00 |
| tRNA       | chr6.tRNA87-GluCTC         | 15.82 | 0.01  | 0.65 | 1.00 |
| scRNA      | HY1-L247                   | 1.49  | 0.02  | 0.65 | 1.00 |
| scRNA      | HY4-L20                    | 3.35  | 0.01  | 0.65 | 1.00 |
| snRNA      | U14-L5                     | 4.24  | -0.01 | 0.65 | 1.00 |
| mir-3p     | hsa-miR-374c-3p            | 2.90  | -0.01 | 0.65 | 1.00 |

|            |                            |       |       |      |      |
|------------|----------------------------|-------|-------|------|------|
| snRNA      | U6-L1308                   | 2.67  | 0.01  | 0.66 | 1.00 |
| tRF5       | chr6.tRNA130-GlnTTG-tRF5   | 1.89  | 0.01  | 0.66 | 1.00 |
| rRNA       | 5S-L1262                   | 1.38  | 0.02  | 0.66 | 1.00 |
| scRNA      | BC200-L69                  | 1.43  | 0.02  | 0.66 | 1.00 |
| scRNA      | HY4-L134                   | 2.51  | -0.02 | 0.66 | 1.00 |
| mir-5p     | hsa-miR-221-5p             | 3.85  | 0.01  | 0.66 | 1.00 |
| rRNA       | 5S-L253                    | 3.20  | -0.01 | 0.66 | 1.00 |
| tRNA       | chr6.tRNA105-AlaAGC        | 1.66  | 0.03  | 0.66 | 1.00 |
| snoRNA     | U106                       | 1.86  | -0.02 | 0.66 | 1.00 |
| mir-5p     | hsa-miR-106a-5p            | 2.83  | 0.01  | 0.66 | 1.00 |
| rRNA       | 5S-L317                    | 1.26  | 0.02  | 0.66 | 1.00 |
| mir-5p     | hsa-miR-744-5p             | 6.54  | -0.01 | 0.66 | 1.00 |
| snoRNA     | U94                        | 3.12  | -0.02 | 0.66 | 1.00 |
| rRNA       | 5S-L109                    | 9.56  | 0.01  | 0.66 | 1.00 |
| rRNA       | 5S-L282                    | 1.46  | -0.02 | 0.67 | 1.00 |
| mir-3p     | hsa-miR-29a-3p             | 5.96  | -0.01 | 0.67 | 1.00 |
| mir-3p     | hsa-miR-1273g-3p           | 5.83  | -0.01 | 0.67 | 1.00 |
| scRNA      | HY4-L109                   | 2.11  | -0.01 | 0.67 | 1.00 |
| piRNA      | piR-32678-L3               | 10.98 | -0.01 | 0.67 | 1.00 |
| tRF5       | chr6.tRNA109-PheGAA-tRF5   | 2.26  | 0.02  | 0.67 | 1.00 |
| mir-5p     | hsa-miR-24-2-5p            | 4.12  | -0.01 | 0.67 | 1.00 |
| scRNA      | HY1-L103                   | 2.46  | 0.01  | 0.67 | 1.00 |
| scRNA      | HY1-L226                   | 3.29  | 0.01  | 0.67 | 1.00 |
| piRNA      | piR-34804                  | 4.98  | 0.01  | 0.67 | 1.00 |
| scRNA      | BC200-L126                 | 3.33  | -0.01 | 0.67 | 1.00 |
| mir-5p     | hsa-miR-3184-5p            | 7.99  | -0.01 | 0.67 | 1.00 |
| mir-3p     | hsa-miR-501-3p             | 4.83  | -0.01 | 0.67 | 1.00 |
| snoRNA     | U38B                       | 2.95  | -0.02 | 0.67 | 1.00 |
| mir-3p     | hsa-miR-628-3p             | 3.76  | 0.01  | 0.67 | 1.00 |
| tRNA       | chr17.tRNA10-GlyTCC        | 1.81  | 0.01  | 0.67 | 1.00 |
| mir-5p     | hsa-miR-99b-5p             | 6.89  | 0.01  | 0.68 | 1.00 |
| mir-3p     | hsa-miR-411-3p             | 1.75  | -0.02 | 0.68 | 1.00 |
| scRNA      | HY4-L21                    | 2.22  | -0.01 | 0.68 | 1.00 |
| rRNA       | 5S-L191                    | 4.70  | -0.01 | 0.68 | 1.00 |
| tRF3       | chr3.tRNA10-PseudoCTC-tRF3 | 1.55  | 0.03  | 0.68 | 1.00 |
| scRNA      | HY4-L93                    | 3.97  | -0.01 | 0.68 | 1.00 |
| snRNA      | U5-L2                      | 6.33  | -0.01 | 0.68 | 1.00 |
| piRNA      | piR-41209                  | 2.58  | -0.01 | 0.68 | 1.00 |
| rRNA       | LSU-rRNA_Hsa-L4            | 8.09  | 0.01  | 0.68 | 1.00 |
| snoRNA     | U96a                       | 3.47  | -0.01 | 0.68 | 1.00 |
| mir-5p     | hsa-miR-196b-5p            | 2.79  | -0.01 | 0.68 | 1.00 |
| mir-5p3pno | hsa-miR-941                | 6.39  | 0.01  | 0.68 | 1.00 |
| tRNA       | chr6.tRNA11-IleAAT         | 8.31  | -0.01 | 0.68 | 1.00 |

|            |                         |      |       |      |      |
|------------|-------------------------|------|-------|------|------|
| mir-5p     | hsa-miR-4746-5p         | 1.73 | -0.02 | 0.68 | 1.00 |
| mir-5p     | hsa-miR-199a-5p         | 6.35 | -0.01 | 0.68 | 1.00 |
| mir-3p     | hsa-miR-29c-3p          | 1.99 | -0.02 | 0.69 | 1.00 |
| rRNA       | 5S-L526                 | 1.32 | 0.02  | 0.69 | 1.00 |
| tRF5       | chr20.tRNA6-LeuAAG-tRF5 | 3.01 | -0.01 | 0.69 | 1.00 |
| rRNA       | 5S-L1144                | 1.38 | -0.01 | 0.69 | 1.00 |
| rRNA       | LSU-rRNA_Hsa-L64        | 1.52 | -0.02 | 0.69 | 1.00 |
| snoRNA     | ACA47                   | 3.23 | 0.01  | 0.69 | 1.00 |
| snRNA      | U7-L52                  | 6.85 | 0.01  | 0.69 | 1.00 |
| piRNA      | piR-31038               | 9.22 | 0.01  | 0.70 | 1.00 |
| mir-3p     | hsa-miR-4677-3p         | 1.78 | -0.01 | 0.70 | 1.00 |
| snoRNA     | ACA66                   | 2.24 | 0.02  | 0.70 | 1.00 |
| piRNA      | piR-35469               | 1.70 | 0.01  | 0.70 | 1.00 |
| tRNA       | chr6.tRNA85-PseudoTTC   | 4.59 | 0.01  | 0.70 | 1.00 |
| mir-5p     | hsa-let-7a-5p           | 2.02 | -0.02 | 0.70 | 1.00 |
| mir-5p     | hsa-miR-148a-5p         | 4.17 | -0.01 | 0.70 | 1.00 |
| scRNA      | HY4-L81                 | 3.17 | -0.01 | 0.70 | 1.00 |
| snRNA      | U17                     | 1.81 | 0.02  | 0.70 | 1.00 |
| snoRNA     | U83B                    | 2.68 | -0.01 | 0.70 | 1.00 |
| snoRNA     | U45A                    | 4.15 | -0.01 | 0.70 | 1.00 |
| tRNA       | chr12.tRNA5-AspGTC      | 4.66 | 0.01  | 0.70 | 1.00 |
| scRNA      | BC200-L114              | 2.21 | 0.01  | 0.70 | 1.00 |
| scRNA      | HY3-L287                | 1.40 | -0.01 | 0.70 | 1.00 |
| tRNA       | chr6.tRNA63-IleTAT      | 1.53 | 0.02  | 0.70 | 1.00 |
| rRNA       | 5S-L1234                | 5.10 | 0.01  | 0.70 | 1.00 |
| scRNA      | HY3-L382                | 1.28 | 0.02  | 0.70 | 1.00 |
| tRF3       | chr12.tRNA7-AspGTC-tRF3 | 1.65 | -0.02 | 0.71 | 1.00 |
| tRNA       | chr6.tRNA78-LeuAAG      | 2.00 | 0.02  | 0.71 | 1.00 |
| mir-5p     | hsa-miR-4433-5p         | 5.15 | 0.01  | 0.71 | 1.00 |
| rRNA       | LSU-rRNA_Hsa-L42        | 1.88 | 0.01  | 0.71 | 1.00 |
| tRNA       | chr6.tRNA147-SerAGA     | 8.22 | 0.01  | 0.71 | 1.00 |
| mir-5p3pno | hsa-miR-4488            | 1.35 | 0.02  | 0.71 | 1.00 |
| snoRNA     | ACA8                    | 2.21 | -0.02 | 0.71 | 1.00 |
| scRNA      | HY3-L190                | 2.20 | -0.01 | 0.71 | 1.00 |
| mir-3p     | hsa-miR-323a-3p         | 3.26 | -0.01 | 0.71 | 1.00 |
| mir-3p     | hsa-miR-15b-3p          | 3.61 | 0.01  | 0.71 | 1.00 |
| tRNA       | chr1.tRNA52-ProCGG      | 2.13 | -0.01 | 0.71 | 1.00 |
| rRNA       | 5S-L1071                | 1.54 | 0.01  | 0.71 | 1.00 |
| scRNA      | HY4-L61                 | 5.54 | -0.01 | 0.72 | 1.00 |
| mir-5p     | hsa-miR-503-5p          | 3.20 | -0.01 | 0.72 | 1.00 |
| mir-3p     | hsa-miR-3605-3p         | 2.12 | -0.01 | 0.72 | 1.00 |
| tRNA       | chr1.tRNA85-ValCAC      | 3.44 | -0.01 | 0.72 | 1.00 |
| piRNA      | piR-36074               | 4.27 | -0.01 | 0.72 | 1.00 |

|            |                         |      |       |      |      |
|------------|-------------------------|------|-------|------|------|
| tRNA       | chr7.tRNA21-CysGCA      | 1.68 | -0.01 | 0.72 | 1.00 |
| tRF3       | chr6.tRNA61-MetCAT-tRF3 | 2.23 | 0.02  | 0.72 | 1.00 |
| mir-3p     | hsa-miR-374b-3p         | 2.49 | 0.01  | 0.72 | 1.00 |
| rRNA       | 5S-L573                 | 3.03 | 0.01  | 0.72 | 1.00 |
| piRNA      | piR-38600               | 3.94 | -0.01 | 0.72 | 1.00 |
| mir-5p     | hsa-miR-340-5p          | 6.42 | -0.01 | 0.72 | 1.00 |
| mir-5p3pno | hsa-miR-511-L2          | 3.90 | 0.01  | 0.72 | 1.00 |
| mir-5p     | hsa-miR-3158-5p-L2      | 1.49 | 0.02  | 0.72 | 1.00 |
| tRNA       | chr5.tRNA22-AspGTC      | 1.97 | 0.02  | 0.73 | 1.00 |
| mir-5p     | hsa-miR-99a-5p          | 7.41 | 0.01  | 0.73 | 1.00 |
| piRNA      | piR-33151-L9            | 3.44 | 0.01  | 0.73 | 1.00 |
| snoRNA     | U58B                    | 4.91 | -0.01 | 0.73 | 1.00 |
| mir-5p     | hsa-miR-450a-5p         | 3.31 | -0.01 | 0.73 | 1.00 |
| mir-5p     | hsa-miR-92b-5p          | 2.28 | -0.01 | 0.73 | 1.00 |
| snRNA      | U1-L11                  | 3.90 | -0.01 | 0.73 | 1.00 |
| tRF3       | chr1.tRNA55-LysTTT-tRF3 | 2.49 | -0.01 | 0.73 | 1.00 |
| scRNA      | HY1-L26                 | 2.97 | -0.01 | 0.73 | 1.00 |
| scRNA      | HY4-L129                | 3.45 | 0.01  | 0.73 | 1.00 |
| snRNA      | U1-L174                 | 1.76 | -0.01 | 0.73 | 1.00 |
| tRNA       | chr1.tRNA106-HisGTG     | 3.36 | 0.01  | 0.73 | 1.00 |
| mir-3p     | hsa-miR-144-3p          | 5.77 | 0.01  | 0.73 | 1.00 |
| mir-5p3pno | hsa-miR-4472-L2         | 1.83 | -0.01 | 0.73 | 1.00 |
| snoRNA     | U100                    | 1.54 | 0.01  | 0.73 | 1.00 |
| snRNA      | U2-L603                 | 6.16 | 0.01  | 0.73 | 1.00 |
| tRNA       | chr14.tRNA4-ThrTGT      | 1.44 | -0.01 | 0.73 | 1.00 |
| snRNA      | U2-L205                 | 1.72 | 0.01  | 0.74 | 1.00 |
| snRNA      | U1-L8                   | 6.14 | -0.01 | 0.74 | 1.00 |
| rRNA       | 5S-L255                 | 2.65 | 0.01  | 0.74 | 1.00 |
| mir-3p     | hsa-miR-2355-3p         | 1.86 | -0.01 | 0.74 | 1.00 |
| snRNA      | U1-L138                 | 3.38 | 0.01  | 0.74 | 1.00 |
| mir-5p     | hsa-miR-193b-5p         | 2.08 | 0.01  | 0.74 | 1.00 |
| mir-5p     | hsa-miR-1228-5p         | 2.00 | -0.02 | 0.74 | 1.00 |
| snoRNA     | U22                     | 3.81 | -0.01 | 0.74 | 1.00 |
| snRNA      | U1-L142                 | 4.24 | 0.01  | 0.74 | 1.00 |
| mir-3p     | hsa-miR-539-3p          | 1.61 | -0.01 | 0.74 | 1.00 |
| mir-5p     | hsa-miR-409-5p          | 1.55 | -0.02 | 0.74 | 1.00 |
| scRNA      | BC200-L120              | 1.92 | -0.01 | 0.74 | 1.00 |
| mir-3p     | hsa-miR-499b-3p         | 3.26 | -0.01 | 0.74 | 1.00 |
| mir-5p3pno | hsa-miR-5096            | 2.21 | -0.01 | 0.74 | 1.00 |
| rRNA       | LSU-rRNA_Hsa-L249       | 7.95 | -0.01 | 0.74 | 1.00 |
| rRNA       | LSU-rRNA_Hsa-L66        | 1.86 | -0.01 | 0.74 | 1.00 |
| scRNA      | BC200-L7                | 2.61 | -0.01 | 0.74 | 1.00 |
| rRNA       | 5S-L95                  | 1.71 | -0.01 | 0.74 | 1.00 |



|            |                         |       |       |      |      |
|------------|-------------------------|-------|-------|------|------|
| snoRNA     | ACA45                   | 6.69  | 0.01  | 0.74 | 1.00 |
| tRNA       | chr6.tRNA166-AlaAGC     | 1.77  | 0.02  | 0.75 | 1.00 |
| snRNA      | U6-L1561                | 2.12  | -0.01 | 0.75 | 1.00 |
| rRNA       | 5S-L136                 | 1.53  | 0.01  | 0.75 | 1.00 |
| tRNA       | chr16.tRNA16-LeuAAG     | 3.29  | -0.01 | 0.75 | 1.00 |
| snoRNA     | U83                     | 2.97  | 0.01  | 0.75 | 1.00 |
| mir-5p3pno | hsa-miR-494             | 1.75  | 0.01  | 0.75 | 1.00 |
| mir-5p3pno | hsa-miR-1287            | 1.87  | -0.02 | 0.75 | 1.00 |
| mir-5p     | hsa-miR-532-5p          | 7.72  | 0.01  | 0.75 | 1.00 |
| rRNA       | 5S-L819                 | 2.01  | 0.01  | 0.75 | 1.00 |
| tRF5       | chr6.tRNA56-PheGAA-tRF5 | 1.38  | 0.01  | 0.75 | 1.00 |
| rRNA       | 5S-L1143                | 1.64  | -0.01 | 0.75 | 1.00 |
| mir-5p     | hsa-miR-192-5p          | 8.24  | 0.01  | 0.75 | 1.00 |
| piRNA      | piR-36376               | 2.64  | -0.01 | 0.75 | 1.00 |
| mir-5p     | hsa-miR-493-5p          | 4.61  | -0.01 | 0.75 | 1.00 |
| scRNA      | HY3-L497                | 2.14  | -0.01 | 0.75 | 1.00 |
| tRNA       | chr6.tRNA31-SerGCT      | 3.19  | -0.01 | 0.75 | 1.00 |
| piRNA      | piR-62011               | 8.25  | -0.01 | 0.75 | 1.00 |
| mir-3p     | hsa-miR-142-3p          | 5.68  | -0.01 | 0.75 | 1.00 |
| snoRNA     | HBI-115                 | 2.00  | -0.02 | 0.75 | 1.00 |
| mir-5p     | hsa-miR-4665-5p         | 1.60  | 0.01  | 0.75 | 1.00 |
| snRNA      | U13_-L44                | 1.56  | -0.01 | 0.75 | 1.00 |
| tRNA       | chr6.tRNA74-LeuCAA      | 2.43  | 0.01  | 0.75 | 1.00 |
| scRNA      | HY4-L3                  | 2.42  | 0.01  | 0.75 | 1.00 |
| scRNA      | HY1-L178                | 4.26  | -0.01 | 0.75 | 1.00 |
| mir-5p3pno | hsa-miR-4473            | 1.40  | -0.02 | 0.75 | 1.00 |
| snRNA      | U2-L250                 | 12.48 | 0.01  | 0.76 | 1.00 |
| snRNA      | U5-L22                  | 1.98  | 0.02  | 0.76 | 1.00 |
| mir-3p     | hsa-miR-378a-3p         | 8.57  | 0.00  | 0.76 | 1.00 |
| mir-5p3pno | hsa-miR-378f            | 1.69  | 0.01  | 0.76 | 1.00 |
| piRNA      | piR-35952-L5            | 2.44  | -0.01 | 0.76 | 1.00 |
| rRNA       | LSU-rRNA_Hsa-L208       | 7.16  | 0.00  | 0.76 | 1.00 |
| tRNA       | chr1.tRNA72-AspGTC      | 7.23  | 0.01  | 0.76 | 1.00 |
| rRNA       | LSU-rRNA_Hsa-L350       | 10.47 | -0.01 | 0.76 | 1.00 |
| mir-3p     | hsa-miR-103a-3p-L2      | 3.33  | 0.01  | 0.76 | 1.00 |
| snoRNA     | HBI-61                  | 3.49  | 0.01  | 0.76 | 1.00 |
| mir-3p     | hsa-miR-30d-3p          | 1.67  | -0.01 | 0.76 | 1.00 |
| scRNA      | HY4-L39                 | 3.89  | 0.01  | 0.76 | 1.00 |
| piRNA      | piR-36743               | 3.67  | -0.01 | 0.76 | 1.00 |
| mir-5p     | hsa-miR-150-5p          | 5.10  | -0.01 | 0.76 | 1.00 |
| mir-5p3pno | hsa-miR-1908            | 3.10  | -0.01 | 0.77 | 1.00 |
| mir-5p     | hsa-miR-181a-5p-L2      | 8.55  | 0.00  | 0.77 | 1.00 |
| mir-5p     | hsa-let-7f-5p-L2        | 6.10  | 0.00  | 0.77 | 1.00 |

|            |                            |       |       |      |      |
|------------|----------------------------|-------|-------|------|------|
| mir-3p     | hsa-miR-27a-3p             | 10.82 | 0.00  | 0.77 | 1.00 |
| rRNA       | LSU-rRNA_Hsa-L43           | 1.53  | -0.01 | 0.77 | 1.00 |
| tRNA       | chr6.tRNA4-ArgTCG          | 2.79  | 0.01  | 0.77 | 1.00 |
| rRNA       | LSU-rRNA_Hsa-L48           | 1.64  | -0.01 | 0.77 | 1.00 |
| tRF3       | chr10.tRNA5-PseudoCTG-tRF3 | 1.70  | 0.01  | 0.77 | 1.00 |
| scRNA      | HY4-L47                    | 2.67  | -0.01 | 0.77 | 1.00 |
| snRNA      | U1-L71                     | 5.05  | 0.01  | 0.77 | 1.00 |
| rRNA       | LSU-rRNA_Hsa-L266          | 3.17  | 0.01  | 0.77 | 1.00 |
| mir-5p     | hsa-miR-3614-5p            | 1.91  | 0.01  | 0.77 | 1.00 |
| mir-5p3pno | hsa-miR-889                | 2.82  | 0.01  | 0.77 | 1.00 |
| rRNA       | 5S-L21                     | 2.71  | -0.01 | 0.77 | 1.00 |
| tRNA       | chr11.tRNA16-ValTAC        | 4.20  | -0.01 | 0.77 | 1.00 |
| tRNA       | chr12.tRNA6-TrpCCA         | 2.86  | -0.01 | 0.77 | 1.00 |
| scRNA      | HY1-L435                   | 3.49  | 0.01  | 0.77 | 1.00 |
| scRNA      | HY3-L432                   | 1.48  | -0.01 | 0.77 | 1.00 |
| scRNA      | HY1-L391                   | 14.88 | 0.00  | 0.77 | 1.00 |
| tRF5       | chr17.tRNA25-SeCTCA-tRF5   | 2.25  | -0.01 | 0.78 | 1.00 |
| scRNA      | HY1-L418                   | 1.64  | -0.01 | 0.78 | 1.00 |
| rRNA       | 5S-L100                    | 2.88  | -0.01 | 0.78 | 1.00 |
| tRF5       | chr1.tRNA118-HisGTG-tRF5   | 1.83  | 0.01  | 0.78 | 1.00 |
| tRNA       | chr19.tRNA13-ValCAC        | 4.33  | 0.01  | 0.78 | 1.00 |
| scRNA      | HY1-L143                   | 2.32  | -0.01 | 0.78 | 1.00 |
| tRNA       | chr1.tRNA134-GluTTC        | 7.45  | 0.00  | 0.78 | 1.00 |
| rRNA       | 5S-L578                    | 2.37  | -0.01 | 0.78 | 1.00 |
| scRNA      | BC200-L90                  | 2.60  | 0.01  | 0.78 | 1.00 |
| scRNA      | HY4-L6                     | 3.98  | 0.00  | 0.78 | 1.00 |
| mir-5p     | hsa-miR-1255b-5p-L2        | 1.62  | -0.01 | 0.78 | 1.00 |
| piRNA      | piR-33468                  | 1.61  | -0.01 | 0.79 | 1.00 |
| rRNA       | SSU-rRNA_Hsa-L73           | 14.22 | 0.00  | 0.79 | 1.00 |
| rRNA       | 5S-L113                    | 10.34 | 0.00  | 0.79 | 1.00 |
| mir-5p     | hsa-miR-30c-5p             | 6.46  | 0.00  | 0.79 | 1.00 |
| scRNA      | HY3-L142                   | 1.70  | -0.01 | 0.79 | 1.00 |
| rRNA       | LSU-rRNA_Hsa-L124          | 2.33  | -0.01 | 0.79 | 1.00 |
| mir-5p     | hsa-miR-26a-5p-L2          | 10.75 | 0.00  | 0.79 | 1.00 |
| snRNA      | U2-L537                    | 2.76  | 0.01  | 0.79 | 1.00 |
| tRNA       | chr12.tRNA10-AspGTC        | 4.59  | 0.01  | 0.79 | 1.00 |
| rRNA       | 5S-L530                    | 5.17  | 0.01  | 0.79 | 1.00 |
| piRNA      | piR-35413-L2               | 1.56  | -0.01 | 0.79 | 1.00 |
| scRNA      | HY1-L191                   | 3.51  | 0.01  | 0.79 | 1.00 |
| piRNA      | piR-49143                  | 11.96 | 0.00  | 0.79 | 1.00 |
| tRF3       | chr17.tRNA1-Pseudo???-tRF3 | 2.09  | -0.01 | 0.79 | 1.00 |
| scRNA      | HY1-L159                   | 4.34  | -0.01 | 0.80 | 1.00 |
| rRNA       | 5S-L111                    | 10.31 | 0.00  | 0.80 | 1.00 |

|            |                            |       |       |      |      |
|------------|----------------------------|-------|-------|------|------|
| piRNA      | piR-50811                  | 3.42  | 0.01  | 0.80 | 1.00 |
| scRNA      | HY1-L179                   | 6.39  | 0.00  | 0.80 | 1.00 |
| scRNA      | BC200-L73                  | 2.27  | 0.01  | 0.80 | 1.00 |
| tRF5       | chr18.tRNA3-PseudoTCC-tRF5 | 1.35  | 0.02  | 0.80 | 1.00 |
| scRNA      | HY4-L152                   | 7.32  | 0.01  | 0.80 | 1.00 |
| mir-3p     | hsa-miR-542-3p             | 3.59  | -0.01 | 0.80 | 1.00 |
| tRNA       | chr16.tRNA7-LysCTT         | 2.24  | -0.01 | 0.80 | 1.00 |
| rRNA       | 5S-L98                     | 9.83  | 0.00  | 0.80 | 1.00 |
| scRNA      | BC200-L32                  | 2.06  | 0.01  | 0.80 | 1.00 |
| tRNA       | chr6.tRNA15-TyrGTA         | 5.52  | -0.01 | 0.80 | 1.00 |
| piRNA      | piR-58356                  | 5.40  | 0.01  | 0.80 | 1.00 |
| scRNA      | HY3-L120                   | 2.34  | -0.01 | 0.80 | 1.00 |
| piRNA      | piR-32377                  | 6.91  | 0.01  | 0.80 | 1.00 |
| scRNA      | HY1-L443                   | 7.16  | 0.00  | 0.80 | 1.00 |
| piRNA      | piR-36323-L3               | 2.88  | -0.01 | 0.81 | 1.00 |
| rRNA       | LSU-rRNA_Hsa-L140          | 4.43  | 0.01  | 0.81 | 1.00 |
| mir-5p3pno | hsa-miR-320c               | 4.43  | 0.00  | 0.81 | 1.00 |
| tRNA       | chr14.tRNA12-PseudoTTT     | 1.56  | -0.01 | 0.81 | 1.00 |
| tRNA       | chr6.tRNA100-LeuCAA        | 3.49  | 0.01  | 0.81 | 1.00 |
| mir-5p     | hsa-let-7b-5p              | 12.45 | 0.00  | 0.81 | 1.00 |
| tRNA       | chr6.tRNA86-PseudoTAC      | 2.07  | 0.01  | 0.81 | 1.00 |
| scRNA      | HY1-L133                   | 2.77  | -0.01 | 0.81 | 1.00 |
| mir-3p     | hsa-miR-409-3p             | 5.71  | -0.01 | 0.81 | 1.00 |
| mir-5p     | hsa-miR-4787-5p            | 1.33  | 0.01  | 0.81 | 1.00 |
| piRNA      | piR-32950                  | 6.31  | 0.00  | 0.81 | 1.00 |
| tRNA       | chrX.tRNA4-ValTAC          | 5.20  | 0.01  | 0.81 | 1.00 |
| scRNA      | BC200-L62                  | 2.72  | 0.01  | 0.81 | 1.00 |
| rRNA       | SSU-rRNA_Hsa-L74           | 6.51  | 0.01  | 0.81 | 1.00 |
| piRNA      | piR-35952-L4               | 3.22  | 0.01  | 0.81 | 1.00 |
| tRNA       | chr6.tRNA14-TyrGTA         | 1.90  | -0.01 | 0.81 | 1.00 |
| mir-3p     | hsa-miR-425-3p             | 4.14  | 0.01  | 0.81 | 1.00 |
| mir-5p3pno | hsa-miR-378d-L2            | 1.37  | 0.01  | 0.81 | 1.00 |
| tRNA       | chr16.tRNA34-GlyCCC        | 4.00  | 0.01  | 0.82 | 1.00 |
| rRNA       | LSU-rRNA_Hsa-L163          | 9.10  | 0.01  | 0.82 | 1.00 |
| rRNA       | LSU-rRNA_Hsa-L188          | 1.82  | -0.01 | 0.82 | 1.00 |
| mir-3p     | hsa-miR-582-3p             | 4.81  | 0.01  | 0.82 | 1.00 |
| rRNA       | LSU-rRNA_Hsa-L198          | 7.74  | 0.00  | 0.82 | 1.00 |
| piRNA      | piR-49145                  | 2.41  | -0.01 | 0.82 | 1.00 |
| mir-5p     | hsa-miR-330-5p             | 1.63  | -0.01 | 0.82 | 1.00 |
| mir-5p3pno | hsa-miR-3168               | 2.09  | -0.01 | 0.82 | 1.00 |
| tRNA       | chr16.tRNA4-ProAGG         | 2.50  | -0.01 | 0.82 | 1.00 |
| scRNA      | HY3-L492                   | 1.45  | 0.01  | 0.82 | 1.00 |
| mir-3p     | hsa-miR-200a-3p            | 2.22  | -0.01 | 0.82 | 1.00 |

|            |                       |       |       |      |      |
|------------|-----------------------|-------|-------|------|------|
| tRNA       | chr20.tRNA3-PseudoCAC | 1.30  | 0.01  | 0.82 | 1.00 |
| mir-3p     | hsa-miR-339-3p        | 2.88  | -0.01 | 0.82 | 1.00 |
| rRNA       | 5S-L946               | 9.07  | 0.00  | 0.82 | 1.00 |
| mir-3p     | hsa-miR-28-3p         | 7.13  | 0.00  | 0.83 | 1.00 |
| tRNA       | chr6.tRNA130-GlnTTG   | 3.35  | 0.01  | 0.83 | 1.00 |
| mir-3p     | hsa-miR-493-3p        | 3.21  | -0.01 | 0.83 | 1.00 |
| rRNA       | LSU-rRNA_Hsa-L143     | 5.07  | 0.00  | 0.83 | 1.00 |
| rRNA       | LSU-rRNA_Hsa-L34      | 1.35  | 0.01  | 0.83 | 1.00 |
| scRNA      | HY1-L434              | 6.45  | 0.00  | 0.83 | 1.00 |
| rRNA       | LSU-rRNA_Hsa-L383     | 14.16 | 0.00  | 0.83 | 1.00 |
| scRNA      | BC200-L23             | 3.06  | 0.01  | 0.83 | 1.00 |
| snRNA      | U2-L615               | 13.00 | 0.01  | 0.83 | 1.00 |
| mir-5p     | hsa-miR-625-5p        | 2.07  | 0.01  | 0.83 | 1.00 |
| rRNA       | LSU-rRNA_Hsa-L200     | 2.74  | -0.01 | 0.83 | 1.00 |
| rRNA       | LSU-rRNA_Hsa-L166     | 5.43  | -0.01 | 0.83 | 1.00 |
| scRNA      | HY4-L83               | 4.19  | 0.00  | 0.83 | 1.00 |
| scRNA      | HY1-L263              | 2.72  | -0.01 | 0.83 | 1.00 |
| mir-5p3pno | hsa-miR-370           | 4.87  | 0.01  | 0.84 | 1.00 |
| mir-3p     | hsa-miR-191-3p        | 1.89  | -0.01 | 0.84 | 1.00 |
| mir-5p     | hsa-miR-382-5p        | 5.88  | -0.01 | 0.84 | 1.00 |
| rRNA       | LSU-rRNA_Hsa-L247     | 1.53  | 0.01  | 0.84 | 1.00 |
| piRNA      | piR-36444             | 2.53  | 0.01  | 0.84 | 1.00 |
| mir-3p     | hsa-miR-625-3p        | 4.68  | 0.00  | 0.84 | 1.00 |
| rRNA       | LSU-rRNA_Hsa-L308     | 1.76  | -0.01 | 0.84 | 1.00 |
| tRNA       | chr15.tRNA2-LysCTT    | 6.59  | 0.00  | 0.84 | 1.00 |
| rRNA       | LSU-rRNA_Hsa-L102     | 3.17  | -0.01 | 0.84 | 1.00 |
| tRNA       | chr6.tRNA36-ArgACG    | 1.39  | -0.01 | 0.84 | 1.00 |
| mir-3p     | hsa-miR-1285-3p       | 3.54  | -0.01 | 0.84 | 1.00 |
| scRNA      | BC200-L164            | 2.30  | -0.01 | 0.84 | 1.00 |
| tRNA       | chr1.tRNA9-ArgTCT     | 2.50  | 0.01  | 0.85 | 1.00 |
| mir-3p     | hsa-miR-5480-3p-L2    | 3.14  | -0.01 | 0.85 | 1.00 |
| scRNA      | HY1-L243              | 6.54  | 0.00  | 0.85 | 1.00 |
| scRNA      | HY1-L393              | 1.73  | 0.01  | 0.85 | 1.00 |
| piRNA      | piR-34535             | 5.56  | 0.01  | 0.85 | 1.00 |
| piRNA      | piR-31115-L4          | 7.28  | 0.00  | 0.85 | 1.00 |
| scRNA      | BC200-L140            | 7.01  | 0.00  | 0.85 | 1.00 |
| mir-3p     | hsa-miR-150-3p        | 2.88  | 0.01  | 0.85 | 1.00 |
| mir-3p     | hsa-miR-502-3p        | 2.26  | -0.01 | 0.85 | 1.00 |
| mir-3p     | hsa-miR-4446-3p       | 3.56  | 0.00  | 0.85 | 1.00 |
| tRNA       | chr6.tRNA133-ValCAC   | 2.93  | 0.00  | 0.85 | 1.00 |
| scRNA      | BC200-L155            | 2.70  | -0.01 | 0.85 | 1.00 |
| snRNA      | U2-L342               | 5.41  | 0.01  | 0.86 | 1.00 |
| scRNA      | BC200-L9              | 2.83  | 0.00  | 0.86 | 1.00 |

|            |                         |       |       |      |      |
|------------|-------------------------|-------|-------|------|------|
| rRNA       | 5S-L99                  | 8.58  | 0.00  | 0.86 | 1.00 |
| scRNA      | HY1-L300                | 2.19  | -0.01 | 0.86 | 1.00 |
| scRNA      | HY1-L321                | 4.61  | 0.00  | 0.86 | 1.00 |
| mir-3p     | hsa-miR-10a-3p          | 1.82  | -0.01 | 0.86 | 1.00 |
| mir-5p     | hsa-miR-769-5p          | 3.02  | 0.01  | 0.86 | 1.00 |
| rRNA       | LSU-rRNA_Hsa-L230       | 3.37  | 0.00  | 0.86 | 1.00 |
| snoRNA     | HBI-100                 | 4.44  | 0.00  | 0.86 | 1.00 |
| scRNA      | HY1-L106                | 1.92  | -0.01 | 0.86 | 1.00 |
| mir-5p     | hsa-miR-144-5p          | 5.62  | 0.00  | 0.86 | 1.00 |
| piRNA      | piR-52416               | 1.72  | 0.00  | 0.86 | 1.00 |
| rRNA       | SSU-rRNA_Hsa-L26        | 3.24  | -0.01 | 0.86 | 1.00 |
| scRNA      | BC200-L135              | 2.24  | -0.01 | 0.86 | 1.00 |
| tRNA       | chr6.tRNA83-LeuTAA      | 2.22  | 0.01  | 0.86 | 1.00 |
| rRNA       | 5S-L112                 | 10.83 | 0.00  | 0.86 | 1.00 |
| tRNA       | chr6.tRNA153-IleAAT     | 1.68  | -0.01 | 0.86 | 1.00 |
| scRNA      | BC200-L24               | 2.86  | 0.00  | 0.87 | 1.00 |
| snRNA      | U5-L66                  | 6.99  | 0.00  | 0.87 | 1.00 |
| tRNA       | chr7.tRNA3-ArgCCT       | 5.38  | 0.00  | 0.87 | 1.00 |
| snoRNA     | U18C                    | 1.82  | 0.01  | 0.87 | 1.00 |
| mir-5p3pno | hsa-miR-378g            | 2.04  | -0.01 | 0.87 | 1.00 |
| rRNA       | 5S-L957                 | 1.43  | -0.01 | 0.87 | 1.00 |
| mir-5p3pno | hsa-miR-451b            | 2.85  | 0.00  | 0.87 | 1.00 |
| scRNA      | HY1-L212                | 2.69  | 0.00  | 0.87 | 1.00 |
| tRF5       | chr1.tRNA98-ValCAC-tRF5 | 2.65  | -0.01 | 0.87 | 1.00 |
| mir-5p3pno | hsa-miR-1468            | 2.31  | -0.01 | 0.87 | 1.00 |
| scRNA      | HY3-L45                 | 3.48  | -0.01 | 0.87 | 1.00 |
| piRNA      | piR-61646-L2            | 8.65  | 0.00  | 0.87 | 1.00 |
| tRNA       | chrX.tRNA2-LeuTAA       | 1.38  | -0.01 | 0.87 | 1.00 |
| mir-5p     | hsa-miR-125b-5p-L2      | 3.27  | 0.00  | 0.87 | 1.00 |
| scRNA      | HY1-L409                | 2.73  | 0.00  | 0.87 | 1.00 |
| mir-3p     | hsa-miR-570-3p          | 1.85  | 0.00  | 0.87 | 1.00 |
| piRNA      | piR-31987               | 6.33  | 0.00  | 0.87 | 1.00 |
| rRNA       | 5S-L97                  | 10.24 | 0.00  | 0.87 | 1.00 |
| scRNA      | HY1-L78                 | 1.39  | 0.01  | 0.87 | 1.00 |
| mir-3p     | hsa-let-7f-2-3p         | 1.55  | -0.01 | 0.87 | 1.00 |
| mir-3p     | hsa-miR-139-3p          | 3.31  | 0.00  | 0.88 | 1.00 |
| piRNA      | piR-36741               | 6.41  | 0.00  | 0.88 | 1.00 |
| mir-3p     | hsa-miR-335-3p          | 3.66  | 0.00  | 0.88 | 1.00 |
| mir-3p     | hsa-miR-652-3p          | 3.92  | 0.00  | 0.88 | 1.00 |
| scRNA      | HY5-L19                 | 2.11  | -0.01 | 0.88 | 1.00 |
| mir-3p     | hsa-miR-576-3p          | 4.04  | 0.00  | 0.88 | 1.00 |
| piRNA      | piR-61465               | 3.75  | 0.00  | 0.88 | 1.00 |
| scRNA      | HY4-L37                 | 4.00  | 0.00  | 0.88 | 1.00 |

|            |                            |       |       |      |      |
|------------|----------------------------|-------|-------|------|------|
| tRNA       | chr6.tRNA157-ValCAC        | 1.40  | 0.01  | 0.88 | 1.00 |
| mir-5p     | hsa-miR-379-5p             | 5.35  | 0.00  | 0.88 | 1.00 |
| piRNA      | piR-37213                  | 1.60  | -0.01 | 0.88 | 1.00 |
| piRNA      | piR-60577-L3               | 7.08  | 0.00  | 0.88 | 1.00 |
| mir-5p3pno | hsa-miR-133a               | 1.55  | -0.01 | 0.89 | 1.00 |
| piRNA      | piR-31638                  | 1.74  | 0.01  | 0.89 | 1.00 |
| piRNA      | piR-31986                  | 8.37  | 0.00  | 0.89 | 1.00 |
| rRNA       | 5S-L104                    | 10.61 | 0.00  | 0.89 | 1.00 |
| tRNA       | chr11.tRNA11-LysTTT        | 7.37  | 0.00  | 0.89 | 1.00 |
| scRNA      | HY4-L59                    | 4.56  | 0.00  | 0.89 | 1.00 |
| snRNA      | U3-L75                     | 3.12  | 0.01  | 0.89 | 1.00 |
| mir-5p     | hsa-let-7i-5p              | 12.19 | 0.00  | 0.89 | 1.00 |
| scRNA      | HY1-L292                   | 5.48  | 0.00  | 0.89 | 1.00 |
| tRNA       | chr1.tRNA110-PseudoTTC     | 1.44  | 0.00  | 0.89 | 1.00 |
| mir-3p     | hsa-miR-369-3p             | 1.38  | 0.00  | 0.89 | 1.00 |
| scRNA      | BC200-L60                  | 2.38  | 0.00  | 0.89 | 1.00 |
| tRNA       | chr1.tRNA54-LysTTT         | 8.24  | 0.00  | 0.89 | 1.00 |
| mir-5p3pno | hsa-miR-320a               | 11.48 | 0.00  | 0.89 | 1.00 |
| piRNA      | piR-57824                  | 1.45  | -0.01 | 0.89 | 1.00 |
| tRNA       | chr19.tRNA2-GlyTCC         | 4.14  | 0.00  | 0.89 | 1.00 |
| scRNA      | BC200-L122                 | 3.31  | 0.00  | 0.90 | 1.00 |
| piRNA      | piR-41588                  | 1.60  | 0.00  | 0.90 | 1.00 |
| tRF3       | chr6.tRNA153-IleAAT-tRF3   | 2.68  | -0.01 | 0.90 | 1.00 |
| rRNA       | 5S-L758                    | 2.59  | 0.00  | 0.90 | 1.00 |
| snRNA      | U1-L24                     | 2.67  | 0.00  | 0.90 | 1.00 |
| rRNA       | LSU-rRNA_Hsa-L283          | 2.10  | -0.01 | 0.90 | 1.00 |
| scRNA      | HY4-L38                    | 4.19  | 0.00  | 0.91 | 1.00 |
| mir-5p     | hsa-miR-301a-5p            | 1.39  | 0.00  | 0.91 | 1.00 |
| scRNA      | HY4-L100                   | 3.24  | 0.00  | 0.91 | 1.00 |
| rRNA       | LSU-rRNA_Hsa-L159          | 2.57  | 0.00  | 0.91 | 1.00 |
| scRNA      | HY1-L37                    | 6.31  | 0.00  | 0.91 | 1.00 |
| mir-5p     | hsa-miR-483-5p             | 4.02  | 0.00  | 0.91 | 1.00 |
| tRNA       | chr22.tRNA1-SeCTCA         | 2.22  | 0.00  | 0.91 | 1.00 |
| snRNA      | U4-L24                     | 1.61  | 0.00  | 0.91 | 1.00 |
| snoRNA     | U59A                       | 6.70  | 0.00  | 0.91 | 1.00 |
| scRNA      | HY4-L71                    | 5.97  | 0.00  | 0.91 | 1.00 |
| rRNA       | LSU-rRNA_Hsa-L385          | 8.75  | 0.00  | 0.91 | 1.00 |
| rRNA       | LSU-rRNA_Hsa-L360          | 1.84  | 0.00  | 0.91 | 1.00 |
| mir-5p     | hsa-miR-21-5p              | 13.59 | 0.00  | 0.91 | 1.00 |
| tRF3       | chr7.tRNA26-PseudoTTG-tRF3 | 2.24  | 0.00  | 0.91 | 1.00 |
| scRNA      | HY5-L11                    | 5.18  | 0.00  | 0.91 | 1.00 |
| mir-3p     | hsa-miR-181a-2-3p          | 4.18  | 0.00  | 0.91 | 1.00 |
| mir-5p     | hsa-let-7a-5p-L3           | 12.09 | 0.00  | 0.91 | 1.00 |

|            |                        |       |       |      |      |
|------------|------------------------|-------|-------|------|------|
| rRNA       | 5S-L356                | 5.32  | 0.00  | 0.92 | 1.00 |
| tRNA       | chr9.tRNA4-ArgTCT      | 1.63  | 0.00  | 0.92 | 1.00 |
| mir-5p3pno | hsa-miR-375            | 6.00  | 0.00  | 0.92 | 1.00 |
| mir-3p     | hsa-miR-23b-3p         | 3.55  | 0.00  | 0.92 | 1.00 |
| snoRNA     | ACA18                  | 2.07  | 0.00  | 0.92 | 1.00 |
| mir-3p     | hsa-let-7f-1-3p        | 1.61  | 0.00  | 0.92 | 1.00 |
| mir-3p     | hsa-miR-3613-3p        | 1.73  | 0.01  | 0.92 | 1.00 |
| mir-5p3pno | hsa-miR-320d-L2        | 3.63  | 0.00  | 0.92 | 1.00 |
| tRNA       | chr2.tRNA6-GluTTC      | 4.09  | 0.00  | 0.92 | 1.00 |
| mir-3p     | hsa-miR-381-3p         | 4.43  | 0.00  | 0.92 | 1.00 |
| mir-3p     | hsa-miR-27b-3p         | 8.94  | 0.00  | 0.92 | 1.00 |
| mir-5p     | hsa-miR-1234-5p        | 14.77 | 0.00  | 0.92 | 1.00 |
| rRNA       | 5S-L247                | 1.54  | 0.00  | 0.92 | 1.00 |
| rRNA       | SSU-rRNA_Hsa-L80       | 6.73  | 0.00  | 0.92 | 1.00 |
| scRNA      | HY3-L177               | 1.55  | 0.00  | 0.92 | 1.00 |
| scRNA      | HY1-L57                | 2.78  | 0.00  | 0.92 | 1.00 |
| rRNA       | 5S-L983                | 1.77  | 0.00  | 0.92 | 1.00 |
| snoRNA     | HBII-82                | 2.14  | -0.01 | 0.93 | 1.00 |
| snoRNA     | mgU2-19/30             | 3.71  | 0.00  | 0.93 | 1.00 |
| scRNA      | HY5-L21                | 11.03 | 0.00  | 0.93 | 1.00 |
| tRNA       | chr3.tRNA10-PseudoCTC  | 7.60  | 0.00  | 0.93 | 1.00 |
| rRNA       | 5S-L1164               | 2.08  | 0.00  | 0.93 | 1.00 |
| mir-5p3pno | hsa-miR-4447           | 1.30  | 0.00  | 0.93 | 1.00 |
| mir-5p3pno | hsa-miR-103b           | 8.26  | 0.00  | 0.93 | 1.00 |
| tRNA       | chr6.tRNA28-IleAAT     | 3.35  | 0.00  | 0.93 | 1.00 |
| tRNA       | chr11.tRNA8-SerGCT     | 4.09  | 0.00  | 0.93 | 1.00 |
| scRNA      | HY4-L159               | 4.46  | 0.00  | 0.93 | 1.00 |
| scRNA      | HY1-L13                | 2.51  | 0.00  | 0.93 | 1.00 |
| mir-5p3pno | hsa-miR-1246           | 5.82  | 0.00  | 0.93 | 1.00 |
| mir-5p     | hsa-miR-486-5p         | 13.44 | 0.00  | 0.93 | 1.00 |
| mir-3p     | hsa-miR-181c-3p        | 1.57  | 0.00  | 0.93 | 1.00 |
| scRNA      | BC200-L16              | 1.59  | 0.01  | 0.93 | 1.00 |
| rRNA       | 5S-L389                | 1.35  | 0.00  | 0.93 | 1.00 |
| scRNA      | BC200-L4               | 3.40  | 0.00  | 0.93 | 1.00 |
| mir-5p     | hsa-miR-23a-5p         | 1.78  | 0.00  | 0.94 | 1.00 |
| tRF3       | chr3.tRNA2-ValAAC-tRF3 | 4.15  | 0.00  | 0.94 | 1.00 |
| mir-3p     | hsa-miR-148a-3p        | 13.46 | 0.00  | 0.94 | 1.00 |
| snoRNA     | U45B                   | 2.57  | 0.00  | 0.94 | 1.00 |
| scRNA      | HY4-L52                | 2.37  | 0.00  | 0.94 | 1.00 |
| tRNA       | chr6.tRNA136-ValAAC    | 2.04  | 0.00  | 0.94 | 1.00 |
| tRNA       | chr6.tRNA143-LysTTT    | 5.55  | 0.00  | 0.94 | 1.00 |
| mir-5p     | hsa-miR-335-5p         | 3.57  | 0.00  | 0.94 | 1.00 |
| scRNA      | HY5-L8                 | 3.89  | 0.00  | 0.94 | 1.00 |

|            |                          |       |      |      |      |
|------------|--------------------------|-------|------|------|------|
| mir-3p     | hsa-miR-143-3p           | 9.70  | 0.00 | 0.94 | 1.00 |
| rRNA       | 5S-L676                  | 1.34  | 0.00 | 0.94 | 1.00 |
| piRNA      | piR-36170                | 2.57  | 0.01 | 0.94 | 1.00 |
| rRNA       | LSU-rRNA_Hsa-L161        | 1.84  | 0.00 | 0.94 | 1.00 |
| scRNA      | HY4-L147                 | 9.21  | 0.00 | 0.94 | 1.00 |
| mir-5p3pno | hsa-miR-152              | 5.59  | 0.00 | 0.94 | 1.00 |
| scRNA      | HY1-L174                 | 1.36  | 0.00 | 0.94 | 1.00 |
| scRNA      | BC200-L19                | 1.37  | 0.00 | 0.94 | 1.00 |
| mir-5p     | hsa-miR-22-5p            | 3.80  | 0.00 | 0.94 | 1.00 |
| mir-5p     | hsa-miR-660-5p           | 3.50  | 0.00 | 0.94 | 1.00 |
| snRNA      | U2-L63                   | 2.16  | 0.00 | 0.94 | 1.00 |
| snoRNA     | ACA34                    | 4.14  | 0.00 | 0.94 | 1.00 |
| scRNA      | HY5                      | 1.57  | 0.00 | 0.94 | 1.00 |
| mir-3p     | hsa-miR-2115-3p          | 1.61  | 0.00 | 0.94 | 1.00 |
| scRNA      | HY3-L105                 | 3.97  | 0.00 | 0.95 | 1.00 |
| piRNA      | piR-43772-L2             | 6.19  | 0.00 | 0.95 | 1.00 |
| rRNA       | SSU-rRNA_Hsa-L50         | 4.47  | 0.00 | 0.95 | 1.00 |
| piRNA      | piR-39361                | 2.73  | 0.00 | 0.95 | 1.00 |
| rRNA       | 5S-L997                  | 1.97  | 0.00 | 0.95 | 1.00 |
| mir-5p     | hsa-miR-183-5p           | 7.53  | 0.00 | 0.95 | 1.00 |
| scRNA      | HY4-L57                  | 2.80  | 0.00 | 0.95 | 1.00 |
| mir-3p     | hsa-miR-106b-3p          | 7.66  | 0.00 | 0.95 | 1.00 |
| rRNA       | LSU-rRNA_Hsa-L378        | 2.46  | 0.00 | 0.95 | 1.00 |
| tRNA       | chr6.tRNA40-ValTAC       | 2.73  | 0.00 | 0.95 | 1.00 |
| mir-3p     | hsa-miR-148b-3p          | 8.62  | 0.00 | 0.95 | 1.00 |
| rRNA       | LSU-rRNA_Hsa-L139        | 14.15 | 0.00 | 0.95 | 1.00 |
| mir-3p     | hsa-miR-200b-3p          | 1.87  | 0.00 | 0.95 | 1.00 |
| mir-5p3pno | hsa-miR-378c             | 5.35  | 0.00 | 0.95 | 1.00 |
| mir-5p     | hsa-miR-129-5p-L2        | 1.82  | 0.00 | 0.95 | 1.00 |
| piRNA      | piR-51119                | 2.10  | 0.00 | 0.95 | 1.00 |
| scRNA      | HY1-L175                 | 2.06  | 0.00 | 0.95 | 1.00 |
| rRNA       | 5S-L1115                 | 1.30  | 0.01 | 0.95 | 1.00 |
| rRNA       | 5S-L586                  | 2.14  | 0.00 | 0.95 | 1.00 |
| tRNA       | chr17.tRNA16-GlnTTG      | 2.36  | 0.00 | 0.95 | 1.00 |
| rRNA       | LSU-rRNA_Hsa-L251        | 7.46  | 0.00 | 0.95 | 1.00 |
| mir-5p3pno | hsa-miR-107              | 1.72  | 0.00 | 0.95 | 1.00 |
| tRF3       | chr16.tRNA28-ProTGG-tRF3 | 1.99  | 0.00 | 0.95 | 1.00 |
| rRNA       | 5S-L367                  | 1.90  | 0.00 | 0.95 | 1.00 |
| mir-3p     | hsa-miR-127-3p           | 5.07  | 0.00 | 0.95 | 1.00 |
| snoRNA     | U97                      | 1.93  | 0.00 | 0.96 | 1.00 |
| rRNA       | LSU-rRNA_Hsa-L13         | 12.04 | 0.00 | 0.96 | 1.00 |
| tRNA       | chr16.tRNA17-LeuCAG      | 3.37  | 0.00 | 0.96 | 1.00 |
| rRNA       | 5S-L233                  | 2.20  | 0.00 | 0.96 | 1.00 |



|            |                          |       |      |      |      |
|------------|--------------------------|-------|------|------|------|
| mir-5p     | hsa-miR-485-5p           | 4.20  | 0.00 | 0.96 | 1.00 |
| scRNA      | HY3-L82                  | 3.20  | 0.00 | 0.96 | 1.00 |
| rRNA       | 5S-L1075                 | 3.11  | 0.00 | 0.96 | 1.00 |
| snRNA      | U1-L29                   | 2.02  | 0.00 | 0.96 | 1.00 |
| snoRNA     | ACA46                    | 2.20  | 0.00 | 0.96 | 1.00 |
| piRNA      | piR-60565-L9             | 1.87  | 0.00 | 0.96 | 1.00 |
| piRNA      | piR-53659                | 2.18  | 0.01 | 0.96 | 1.00 |
| snRNA      | U5-L133                  | 2.25  | 0.00 | 0.96 | 1.00 |
| snRNA      | U1-L39                   | 1.74  | 0.00 | 0.96 | 1.00 |
| scRNA      | HY1-L374                 | 8.15  | 0.00 | 0.96 | 1.00 |
| tRF3       | chrX.tRNA2-LeuTAA-tRF3   | 1.82  | 0.00 | 0.96 | 1.00 |
| tRNA       | chr1.tRNA16-HisGTG       | 11.64 | 0.00 | 0.96 | 1.00 |
| tRNA       | chr13.tRNA2-PseudoCTC    | 4.77  | 0.00 | 0.96 | 1.00 |
| snRNA      | U3-L205                  | 4.79  | 0.00 | 0.96 | 1.00 |
| rRNA       | 5S-L102                  | 7.36  | 0.00 | 0.96 | 1.00 |
| piRNA      | piR-53129                | 1.55  | 0.00 | 0.96 | 1.00 |
| rRNA       | LSU-rRNA_Hsa-L2          | 9.24  | 0.00 | 0.96 | 1.00 |
| piRNA      | piR-33151-L8             | 4.43  | 0.00 | 0.96 | 1.00 |
| mir-5p3pno | hsa-miR-1180             | 4.05  | 0.00 | 0.97 | 1.00 |
| mir-5p     | hsa-miR-181b-5p-L2       | 6.05  | 0.00 | 0.97 | 1.00 |
| rRNA       | LSU-rRNA_Hsa-L214        | 2.13  | 0.00 | 0.97 | 1.00 |
| tRNA       | chr6.tRNA66-AlaTGC       | 1.95  | 0.00 | 0.97 | 1.00 |
| mir-5p3pno | hsa-miR-215              | 3.83  | 0.00 | 0.97 | 1.00 |
| tRNA       | chr14.tRNA7-ArgACG       | 1.75  | 0.00 | 0.97 | 1.00 |
| piRNA      | piR-51810-L2             | 8.21  | 0.00 | 0.97 | 1.00 |
| mir-5p     | hsa-miR-200c-5p          | 2.02  | 0.00 | 0.97 | 1.00 |
| mir-3p     | hsa-miR-382-3p           | 2.29  | 0.00 | 0.97 | 1.00 |
| tRF5       | chr6.tRNA114-ArgCCG-tRF5 | 1.61  | 0.00 | 0.97 | 1.00 |
| tRNA       | chr7.tRNA8-CysGCA        | 1.87  | 0.00 | 0.97 | 1.00 |
| scRNA      | HY4-L32                  | 3.65  | 0.00 | 0.97 | 1.00 |
| tRNA       | chr18.tRNA4-LysCTT       | 6.31  | 0.00 | 0.98 | 1.00 |
| tRNA       | chr17.tRNA31-AsnGTT      | 2.61  | 0.00 | 0.98 | 1.00 |
| snoRNA     | U105                     | 2.35  | 0.00 | 0.98 | 1.00 |
| tRNA       | chr17.tRNA17-SupTTA      | 2.90  | 0.00 | 0.98 | 1.00 |
| tRNA       | chr7.tRNA7-CysGCA        | 7.06  | 0.00 | 0.98 | 1.00 |
| scRNA      | HY3-L196                 | 1.85  | 0.00 | 0.98 | 1.00 |
| scRNA      | HY3-L84                  | 6.39  | 0.00 | 0.98 | 1.00 |
| mir-5p     | hsa-miR-15a-5p           | 3.78  | 0.00 | 0.98 | 1.00 |
| rRNA       | 5S-L550                  | 2.32  | 0.00 | 0.98 | 1.00 |
| scRNA      | HY1-L277                 | 3.60  | 0.00 | 0.98 | 1.00 |
| tRF3       | chr6.tRNA36-ArgACG-tRF3  | 4.47  | 0.00 | 0.98 | 1.00 |
| rRNA       | 5S-L612                  | 2.86  | 0.00 | 0.98 | 1.00 |
| mir-3p     | hsa-miR-10b-3p           | 1.70  | 0.00 | 0.98 | 1.00 |

|            |                            |       |      |      |      |
|------------|----------------------------|-------|------|------|------|
| scRNA      | HY4-L150                   | 3.26  | 0.00 | 0.98 | 1.00 |
| rRNA       | LSU-rRNA_Hsa-L221          | 2.74  | 0.00 | 0.99 | 1.00 |
| scRNA      | HY1-L304                   | 3.88  | 0.00 | 0.99 | 1.00 |
| tRNA       | chr1.tRNA60-PseudoTAA      | 3.73  | 0.00 | 0.99 | 1.00 |
| tRNA       | chr2.tRNA1-PseudoCCC       | 5.86  | 0.00 | 0.99 | 1.00 |
| tRNA       | chr1.tRNA5-GluTTC          | 5.89  | 0.00 | 0.99 | 1.00 |
| scRNA      | BC200-L128                 | 2.65  | 0.00 | 0.99 | 1.00 |
| mir-5p     | hsa-miR-2115-5p            | 1.27  | 0.00 | 0.99 | 1.00 |
| piRNA      | piR-35982-L6               | 1.98  | 0.00 | 0.99 | 1.00 |
| mir-5p     | hsa-miR-224-5p             | 6.88  | 0.00 | 0.99 | 1.00 |
| piRNA      | piR-49144                  | 7.05  | 0.00 | 0.99 | 1.00 |
| mir-5p     | hsa-miR-452-5p             | 1.74  | 0.00 | 0.99 | 1.00 |
| snoRNA     | HBII-82B                   | 2.38  | 0.00 | 0.99 | 1.00 |
| piRNA      | piR-44984-L3               | 2.62  | 0.00 | 0.99 | 1.00 |
| piRNA      | piR-31935                  | 4.57  | 0.00 | 0.99 | 1.00 |
| mir-3p     | hsa-miR-671-3p             | 4.05  | 0.00 | 0.99 | 1.00 |
| tRF5       | chr20.tRNA7-PseudoCTC-tRF5 | 1.40  | 0.00 | 0.99 | 1.00 |
| scRNA      | HY4-L112                   | 3.97  | 0.00 | 0.99 | 1.00 |
| tRF3       | chr14.tRNA10-IleAAT-tRF3   | 2.47  | 0.00 | 0.99 | 1.00 |
| mir-5p3pno | hsa-miR-3615               | 7.34  | 0.00 | 0.99 | 1.00 |
| mir-3p     | hsa-miR-126-3p             | 11.12 | 0.00 | 0.99 | 1.00 |
| snoRNA     | mgU6-47                    | 1.72  | 0.00 | 1.00 | 1.00 |
| snRNA      | U2-L405                    | 3.55  | 0.00 | 1.00 | 1.00 |
| scRNA      | HY3-L199                   | 1.72  | 0.00 | 1.00 | 1.00 |
| rRNA       | 5S-L344                    | 2.37  | 0.00 | 1.00 | 1.00 |
| scRNA      | BC200-L13                  | 2.84  | 0.00 | 1.00 | 1.00 |
| tRNA       | chr17.tRNA15-CysGCA        | 6.11  | 0.00 | 1.00 | 1.00 |
| mir-3p     | hsa-miR-500a-3p            | 3.32  | 0.00 | 1.00 | 1.00 |
| tRNA       | chr10.tRNA6-ValTAC         | 1.49  | 0.00 | 1.00 | 1.00 |

**Supplementary Table 11: RNA correlations with age**

| <i>RNA type</i> | <i>ID</i>               | <i>Average read count (log2 CPM)</i> | <i>Correlation coefficient</i> | <i>P-value</i> | <i>Adjusted P-value</i> |
|-----------------|-------------------------|--------------------------------------|--------------------------------|----------------|-------------------------|
| mir-5p3pno      | hsa-miR-543             | 5.86                                 | -0.06                          | 1.08E-05       | 1.61E-02                |
| mir-3p          | hsa-miR-151a-3p         | 11.62                                | -0.04                          | 2.50E-05       | 1.86E-02                |
| mir-5p          | hsa-miR-485-5p          | 4.20                                 | -0.06                          | 1.62E-04       | 6.06E-02                |
| tRNA            | chr6.tRNA11-IleAAT      | 8.31                                 | 0.05                           | 1.63E-04       | 6.06E-02                |
| tRNA            | chr14.tRNA16-TyrGTA     | 3.58                                 | 0.07                           | 3.13E-04       | 7.82E-02                |
| tRNA            | chr11.tRNA11-LysTTT     | 7.37                                 | 0.05                           | 3.16E-04       | 7.82E-02                |
| tRNA            | chr6.tRNA77-GluCTC      | 4.25                                 | 0.04                           | 6.19E-04       | 9.35E-02                |
| rRNA            | 5S-L100                 | 2.88                                 | 0.06                           | 6.20E-04       | 9.35E-02                |
| tRNA            | chr11.tRNA13-PheGAA     | 3.60                                 | 0.06                           | 6.47E-04       | 9.35E-02                |
| mir-5p          | hsa-miR-4433-5p         | 5.15                                 | -0.04                          | 7.40E-04       | 9.35E-02                |
| mir-3p          | hsa-miR-127-3p          | 5.07                                 | -0.05                          | 7.51E-04       | 9.35E-02                |
| mir-3p          | hsa-miR-654-3p          | 3.75                                 | -0.07                          | 7.54E-04       | 9.35E-02                |
| piRNA           | piR-35468               | 4.14                                 | 0.05                           | 9.31E-04       | 0.10                    |
| tRNA            | chr6.tRNA15-TyrGTA      | 5.52                                 | 0.05                           | 9.77E-04       | 0.10                    |
| scRNA           | HY4-L152                | 7.32                                 | 0.03                           | 1.12E-03       | 0.11                    |
| tRNA            | chr6.tRNA148-SerTGA     | 3.55                                 | 0.07                           | 1.46E-03       | 0.14                    |
| rRNA            | 5S-L530                 | 5.17                                 | 0.07                           | 1.55E-03       | 0.14                    |
| mir-5p          | hsa-miR-224-5p          | 6.88                                 | -0.03                          | 1.80E-03       | 0.15                    |
| rRNA            | LSU-rRNA_Hsa-L147       | 2.70                                 | 0.07                           | 2.36E-03       | 0.18                    |
| snoRNA          | U35A                    | 1.80                                 | 0.08                           | 2.36E-03       | 0.18                    |
| mir-5p          | hsa-miR-744-5p          | 6.54                                 | -0.03                          | 2.60E-03       | 0.18                    |
| tRNA            | chr15.tRNA4-ArgTCG      | 2.60                                 | 0.06                           | 2.96E-03       | 0.20                    |
| piRNA           | piR-32678               | 6.09                                 | 0.02                           | 3.17E-03       | 0.20                    |
| mir-3p          | hsa-miR-28-3p           | 7.13                                 | -0.02                          | 3.27E-03       | 0.20                    |
| mir-3p          | hsa-miR-671-3p          | 4.05                                 | -0.03                          | 3.64E-03       | 0.21                    |
| snRNA           | U2-L1061                | 11.07                                | 0.05                           | 3.66E-03       | 0.21                    |
| mir-5p          | hsa-miR-584-5p          | 7.31                                 | -0.03                          | 4.04E-03       | 0.22                    |
| piRNA           | piR-31935               | 4.57                                 | 0.03                           | 4.09E-03       | 0.22                    |
| tRNA            | chr12.tRNA11-PheGAA     | 1.77                                 | 0.07                           | 4.21E-03       | 0.22                    |
| rRNA            | SSU-rRNA_Hsa-L74        | 6.51                                 | 0.03                           | 5.03E-03       | 0.23                    |
| tRNA            | chr14.tRNA8-CysGCA      | 4.27                                 | 0.09                           | 5.10E-03       | 0.23                    |
| snRNA           | U14-L2                  | 1.79                                 | -0.07                          | 5.44E-03       | 0.23                    |
| snoRNA          | HBI-100                 | 4.44                                 | -0.03                          | 5.46E-03       | 0.23                    |
| mir-5p          | hsa-miR-28-5p           | 5.11                                 | -0.03                          | 5.50E-03       | 0.23                    |
| snRNA           | U1-L29                  | 2.03                                 | 0.05                           | 5.57E-03       | 0.23                    |
| scRNA           | BC200-L31               | 1.42                                 | 0.07                           | 5.70E-03       | 0.23                    |
| mir-3p          | hsa-miR-1307-3p         | 7.96                                 | -0.03                          | 5.81E-03       | 0.23                    |
| tRF3            | chr6.tRNA36-ArgACG-tRF3 | 4.47                                 | 0.05                           | 5.85E-03       | 0.23                    |
| mir-3p          | hsa-miR-381-3p          | 4.43                                 | -0.04                          | 6.10E-03       | 0.23                    |

|            |                        |       |       |          |      |
|------------|------------------------|-------|-------|----------|------|
| mir-5p     | hsa-miR-877-5p         | 2.35  | -0.04 | 6.39E-03 | 0.24 |
| scRNA      | BC200-L18              | 3.08  | 0.04  | 6.49E-03 | 0.24 |
| scRNA      | BC200-L38              | 1.58  | 0.09  | 6.89E-03 | 0.24 |
| mir-5p     | hsa-miR-21-5p          | 13.59 | -0.02 | 7.01E-03 | 0.24 |
| mir-5p3pno | hsa-miR-3909           | 1.71  | -0.06 | 7.03E-03 | 0.24 |
| scRNA      | BC200-L88              | 1.65  | 0.06  | 7.86E-03 | 0.26 |
| scRNA      | HY5-L8                 | 3.89  | 0.04  | 8.10E-03 | 0.26 |
| scRNA      | HY1-L389               | 2.66  | 0.04  | 8.46E-03 | 0.26 |
| snRNA      | U7-L207                | 2.19  | 0.08  | 8.56E-03 | 0.26 |
| tRNA       | chr14.tRNA4-ThrTGT     | 1.44  | 0.06  | 8.61E-03 | 0.26 |
| snRNA      | U2-L782                | 2.99  | 0.05  | 8.70E-03 | 0.26 |
| mir-3p     | hsa-miR-3613-3p        | 1.73  | 0.07  | 9.10E-03 | 0.26 |
| scRNA      | BC200-L122             | 3.31  | 0.03  | 9.23E-03 | 0.26 |
| piRNA      | piR-57824              | 1.45  | 0.06  | 9.51E-03 | 0.27 |
| mir-3p     | hsa-miR-361-3p         | 7.04  | -0.02 | 9.80E-03 | 0.27 |
| tRNA       | chr6.tRNA6-ArgACG      | 2.65  | -0.05 | 9.89E-03 | 0.27 |
| tRF5       | chr3.tRNA5-LeuAAG-tRF5 | 3.59  | 0.03  | 1.04E-02 | 0.27 |
| snRNA      | U2-L603                | 6.16  | 0.04  | 1.08E-02 | 0.27 |
| mir-5p     | hsa-miR-30d-5p         | 10.84 | -0.02 | 1.09E-02 | 0.27 |
| scRNA      | HY1-L374               | 8.15  | 0.02  | 1.09E-02 | 0.27 |
| rRNA       | 5S-L489                | 5.18  | 0.12  | 1.11E-02 | 0.27 |
| snRNA      | U2-L1058               | 6.70  | 0.04  | 1.12E-02 | 0.27 |
| snRNA      | U2-L405                | 3.55  | 0.05  | 1.15E-02 | 0.27 |
| rRNA       | LSU-rRNA_Hsa-L385      | 8.75  | 0.02  | 1.19E-02 | 0.28 |
| piRNA      | piR-61298              | 1.91  | -0.08 | 1.20E-02 | 0.28 |
| snRNA      | U2-L887                | 6.33  | 0.04  | 1.24E-02 | 0.28 |
| rRNA       | SSU-rRNA_Hsa-L73       | 14.22 | 0.02  | 1.27E-02 | 0.29 |
| scRNA      | BC200-L12              | 1.72  | 0.07  | 1.29E-02 | 0.29 |
| scRNA      | BC200-L129             | 2.19  | 0.06  | 1.35E-02 | 0.29 |
| scRNA      | BC200-L69              | 1.44  | 0.06  | 1.36E-02 | 0.29 |
| snoRNA     | HBII-85-8              | 2.22  | 0.08  | 1.39E-02 | 0.29 |
| tRNA       | chr1.tRNA106-HisGTG    | 3.36  | -0.03 | 1.40E-02 | 0.29 |
| mir-5p3pno | hsa-miR-370            | 4.87  | -0.05 | 1.42E-02 | 0.29 |
| scRNA      | HY1-L57                | 2.78  | 0.04  | 1.42E-02 | 0.29 |
| mir-5p     | hsa-miR-382-5p         | 5.88  | -0.03 | 1.43E-02 | 0.29 |
| mir-3p     | hsa-miR-409-3p         | 5.71  | -0.04 | 1.49E-02 | 0.30 |
| snoRNA     | U56                    | 2.63  | 0.06  | 1.52E-02 | 0.30 |
| snRNA      | U2-L240                | 3.38  | 0.05  | 1.53E-02 | 0.30 |
| rRNA       | LSU-rRNA_Hsa-L31       | 7.70  | 0.03  | 1.56E-02 | 0.30 |
| rRNA       | SSU-rRNA_Hsa-L24       | 9.30  | 0.02  | 1.62E-02 | 0.30 |
| snRNA      | U2-L128                | 7.39  | 0.03  | 1.66E-02 | 0.30 |
| rRNA       | LSU-rRNA_Hsa-L63       | 4.97  | 0.07  | 1.67E-02 | 0.30 |
| snoRNA     | HBII-276               | 3.49  | 0.05  | 1.69E-02 | 0.30 |

|            |                          |       |       |          |      |
|------------|--------------------------|-------|-------|----------|------|
| mir-3p     | hsa-miR-493-3p           | 3.21  | -0.04 | 1.75E-02 | 0.30 |
| rRNA       | LSU-rRNA_Hsa-L275        | 5.54  | 0.03  | 1.79E-02 | 0.30 |
| mir-5p     | hsa-let-7f-5p-L2         | 6.10  | -0.02 | 1.80E-02 | 0.30 |
| tRNA       | chr6.tRNA38-IleAAT       | 3.15  | 0.07  | 1.82E-02 | 0.30 |
| tRNA       | chr14.tRNA2-LeuTAG       | 2.26  | 0.05  | 1.87E-02 | 0.30 |
| mir-5p     | hsa-miR-493-5p           | 4.61  | -0.04 | 1.87E-02 | 0.30 |
| mir-3p     | hsa-miR-425-3p           | 4.14  | -0.03 | 1.88E-02 | 0.30 |
| rRNA       | LSU-rRNA_Hsa-L350        | 10.47 | 0.02  | 1.90E-02 | 0.30 |
| piRNA      | piR-34535                | 5.56  | 0.04  | 1.94E-02 | 0.30 |
| snRNA      | U2-L615                  | 13.00 | 0.04  | 1.95E-02 | 0.30 |
| mir-5p     | hsa-miR-199a-5p          | 6.35  | -0.02 | 1.99E-02 | 0.30 |
| mir-5p     | hsa-miR-432-5p           | 5.13  | -0.04 | 2.01E-02 | 0.30 |
| mir-3p     | hsa-miR-4446-3p          | 3.56  | -0.03 | 2.02E-02 | 0.30 |
| tRNA       | chr1.tRNA16-HisGTG       | 11.64 | -0.02 | 2.02E-02 | 0.30 |
| scRNA      | HY1-L159                 | 4.34  | 0.03  | 2.07E-02 | 0.30 |
| rRNA       | LSU-rRNA_Hsa-L387        | 9.35  | 0.02  | 2.09E-02 | 0.30 |
| rRNA       | LSU-rRNA_Hsa-L323        | 8.20  | 0.04  | 2.09E-02 | 0.30 |
| scRNA      | BC200-L110               | 1.47  | 0.06  | 2.09E-02 | 0.30 |
| rRNA       | LSU-rRNA_Hsa-L67         | 3.16  | 0.05  | 2.10E-02 | 0.30 |
| mir-5p3pno | hsa-miR-1908             | 3.10  | -0.04 | 2.11E-02 | 0.30 |
| snoRNA     | HBII-234                 | 2.39  | 0.06  | 2.13E-02 | 0.30 |
| rRNA       | 5S-L233                  | 2.20  | 0.04  | 2.14E-02 | 0.30 |
| tRNA       | chr6.tRNA105-AlaAGC      | 1.66  | 0.05  | 2.15E-02 | 0.30 |
| tRNA       | chr16.tRNA2-ArgCCT       | 3.09  | 0.03  | 2.16E-02 | 0.30 |
| mir-3p     | hsa-miR-148b-3p          | 8.62  | -0.02 | 2.21E-02 | 0.30 |
| snRNA      | U2-L532                  | 3.08  | 0.05  | 2.21E-02 | 0.30 |
| tRNA       | chr1.tRNA137-Pseudo???   | 6.02  | 0.03  | 2.22E-02 | 0.30 |
| mir-5p3pno | hsa-miR-134              | 6.74  | -0.03 | 2.28E-02 | 0.30 |
| snoRNA     | HBII-55                  | 4.50  | 0.05  | 2.29E-02 | 0.30 |
| rRNA       | LSU-rRNA_Hsa-L18         | 5.98  | 0.03  | 2.30E-02 | 0.30 |
| rRNA       | 5S-L1114                 | 1.68  | 0.04  | 2.32E-02 | 0.30 |
| piRNA      | piR-49145                | 2.41  | -0.04 | 2.35E-02 | 0.30 |
| rRNA       | LSU-rRNA_Hsa-L198        | 7.74  | 0.02  | 2.35E-02 | 0.30 |
| rRNA       | SSU-rRNA_Hsa-L50         | 4.47  | 0.04  | 2.36E-02 | 0.30 |
| scRNA      | HY1-L391                 | 14.88 | 0.02  | 2.38E-02 | 0.30 |
| mir-5p     | hsa-miR-379-5p           | 5.35  | -0.03 | 2.43E-02 | 0.31 |
| tRNA       | chr18.tRNA4-LysCTT       | 6.31  | 0.03  | 2.60E-02 | 0.33 |
| tRNA       | chr12.tRNA5-AspGTC       | 4.66  | 0.03  | 2.65E-02 | 0.33 |
| tRF5       | chr17.tRNA26-CysGCA-tRF5 | 5.39  | -0.02 | 2.66E-02 | 0.33 |
| mir-3p     | hsa-miR-2355-3p          | 1.86  | -0.04 | 2.69E-02 | 0.33 |
| rRNA       | LSU-rRNA_Hsa-L15         | 6.48  | 0.02  | 2.71E-02 | 0.33 |
| tRNA       | chr6.tRNA28-IleAAT       | 3.35  | 0.04  | 2.71E-02 | 0.33 |
| snoRNA     | U43                      | 4.95  | 0.04  | 2.77E-02 | 0.33 |

|            |                          |       |       |          |      |
|------------|--------------------------|-------|-------|----------|------|
| mir-3p     | hsa-miR-106b-3p          | 7.66  | -0.02 | 2.79E-02 | 0.33 |
| tRF3       | chr3.tRNA6-CysGCA-tRF3   | 2.19  | 0.05  | 2.82E-02 | 0.33 |
| tRF3       | chr14.tRNA14-GluTTC-tRF3 | 2.02  | -0.06 | 2.85E-02 | 0.33 |
| mir-5p     | hsa-miR-221-5p           | 3.86  | -0.03 | 2.86E-02 | 0.33 |
| snRNA      | U2-L75                   | 4.87  | 0.04  | 2.87E-02 | 0.33 |
| mir-3p     | hsa-miR-140-3p           | 9.02  | -0.02 | 2.88E-02 | 0.33 |
| rRNA       | SSU-rRNA_Hsa-L33         | 12.79 | 0.02  | 2.90E-02 | 0.33 |
| mir-3p     | hsa-miR-222-3p           | 8.33  | -0.02 | 2.91E-02 | 0.33 |
| rRNA       | LSU-rRNA_Hsa-L331        | 1.53  | 0.05  | 2.96E-02 | 0.33 |
| snRNA      | U6-L9                    | 4.67  | 0.03  | 2.99E-02 | 0.33 |
| scRNA      | HY5-L21                  | 11.03 | 0.02  | 3.01E-02 | 0.33 |
| tRNA       | chr17.tRNA18-ArgCCT      | 1.71  | 0.04  | 3.05E-02 | 0.33 |
| mir-5p     | hsa-miR-3173-5p          | 2.41  | 0.05  | 3.05E-02 | 0.33 |
| rRNA       | SSU-rRNA_Hsa-L16         | 6.78  | 0.03  | 3.07E-02 | 0.33 |
| scRNA      | HY1-L277                 | 3.60  | 0.03  | 3.19E-02 | 0.34 |
| scRNA      | HY4-L110                 | 1.99  | -0.04 | 3.22E-02 | 0.34 |
| scRNA      | HY1-L208                 | 3.29  | 0.03  | 3.23E-02 | 0.34 |
| scRNA      | HY5-L7                   | 2.29  | 0.04  | 3.25E-02 | 0.34 |
| tRNA       | chr12.tRNA10-AspGTC      | 4.59  | 0.03  | 3.31E-02 | 0.34 |
| piRNA      | piR-43325-L7             | 3.82  | 0.03  | 3.35E-02 | 0.34 |
| rRNA       | SSU-rRNA_Hsa-L80         | 6.73  | 0.03  | 3.50E-02 | 0.35 |
| tRF3       | chr6.tRNA61-MetCAT-tRF3  | 2.22  | 0.05  | 3.50E-02 | 0.35 |
| snRNA      | U5-L66                   | 6.99  | 0.02  | 3.52E-02 | 0.35 |
| rRNA       | LSU-rRNA_Hsa-L221        | 2.74  | 0.04  | 3.54E-02 | 0.35 |
| rRNA       | 5S-L126                  | 2.55  | 0.03  | 3.55E-02 | 0.35 |
| mir-5p     | hsa-miR-654-5p           | 3.09  | -0.04 | 3.57E-02 | 0.35 |
| mir-5p     | hsa-miR-532-5p           | 7.72  | -0.02 | 3.58E-02 | 0.35 |
| scRNA      | HY1-L178                 | 4.26  | 0.03  | 3.61E-02 | 0.35 |
| rRNA       | LSU-rRNA_Hsa-L389        | 10.71 | 0.02  | 3.67E-02 | 0.35 |
| rRNA       | LSU-rRNA_Hsa-L409        | 4.71  | 0.02  | 3.70E-02 | 0.36 |
| mir-5p     | hsa-miR-20a-5p           | 7.17  | -0.02 | 3.75E-02 | 0.36 |
| tRF5       | chr1.tRNA104-PseudoGTT-t | 2.69  | 0.04  | 3.76E-02 | 0.36 |
| tRF3       | chr17.tRNA13-GlyCCC-tRF3 | 5.22  | 0.02  | 3.87E-02 | 0.36 |
| mir-3p     | hsa-miR-136-3p           | 2.62  | -0.04 | 3.87E-02 | 0.36 |
| piRNA      | piR-43771-L6             | 2.91  | 0.04  | 3.92E-02 | 0.36 |
| tRNA       | chr6.tRNA138-ArgACG      | 1.66  | 0.05  | 3.92E-02 | 0.36 |
| piRNA      | piR-57516                | 5.25  | 0.02  | 3.93E-02 | 0.36 |
| mir-5p3pno | hsa-miR-128              | 8.32  | -0.02 | 3.98E-02 | 0.36 |
| scRNA      | BC200-L90                | 2.60  | 0.03  | 4.01E-02 | 0.36 |
| snRNA      | U7-L52                   | 6.85  | 0.03  | 4.03E-02 | 0.36 |
| tRNA       | chr1.tRNA72-AspGTC       | 7.23  | 0.03  | 4.11E-02 | 0.37 |
| scRNA      | HY4-L112                 | 3.97  | -0.02 | 4.14E-02 | 0.37 |
| scRNA      | HY3-L524                 | 1.56  | 0.05  | 4.16E-02 | 0.37 |

|            |                          |       |       |          |      |
|------------|--------------------------|-------|-------|----------|------|
| tRNA       | chr16.tRNA19-GlyGCC      | 1.88  | 0.06  | 4.17E-02 | 0.37 |
| tRNA       | chr16.tRNA24-GlyGCC      | 15.82 | -0.02 | 4.21E-02 | 0.37 |
| scRNA      | BC200-L165               | 1.54  | 0.05  | 4.22E-02 | 0.37 |
| snRNA      | U5-L22                   | 1.98  | 0.05  | 4.29E-02 | 0.37 |
| mir-3p     | hsa-miR-30e-3p           | 8.45  | -0.02 | 4.36E-02 | 0.37 |
| tRNA       | chr1.tRNA128-LysCTT      | 3.24  | 0.03  | 4.41E-02 | 0.38 |
| scRNA      | HY1-L121                 | 2.71  | 0.04  | 4.49E-02 | 0.38 |
| rRNA       | LSU-rRNA_Hsa-L230        | 3.37  | 0.02  | 4.55E-02 | 0.38 |
| rRNA       | 5S-L1217                 | 1.70  | 0.04  | 4.60E-02 | 0.38 |
| snRNA      | U2-L250                  | 12.48 | 0.04  | 4.60E-02 | 0.38 |
| tRF5       | chr17.tRNA33-PseudoTTG-t | 5.92  | -0.03 | 4.63E-02 | 0.38 |
| mir-3p     | hsa-miR-382-3p           | 2.29  | -0.05 | 4.69E-02 | 0.38 |
| mir-5p3pno | hsa-miR-1290             | 2.06  | 0.06  | 4.71E-02 | 0.38 |
| snoRNA     | snR38C                   | 2.03  | 0.06  | 4.77E-02 | 0.38 |
| snRNA      | U4-L41                   | 2.29  | 0.04  | 4.79E-02 | 0.38 |
| scRNA      | HY1-L292                 | 5.48  | 0.02  | 4.81E-02 | 0.38 |
| rRNA       | LSU-rRNA_Hsa-L143        | 5.07  | 0.02  | 4.82E-02 | 0.38 |
| mir-3p     | hsa-miR-502-3p           | 2.26  | -0.04 | 4.84E-02 | 0.38 |
| scRNA      | BC200-L13                | 2.84  | 0.04  | 4.87E-02 | 0.38 |
| mir-3p     | hsa-miR-101-3p           | 10.61 | -0.02 | 4.87E-02 | 0.38 |
| snoRNA     | ACA16                    | 2.80  | 0.04  | 4.90E-02 | 0.38 |
| piRNA      | piR-33468                | 1.61  | 0.04  | 4.92E-02 | 0.38 |
| scRNA      | HY4-L93                  | 3.97  | -0.02 | 4.95E-02 | 0.38 |
| rRNA       | LSU-rRNA_Hsa-L384        | 14.09 | 0.01  | 4.96E-02 | 0.38 |
| tRNA       | chr19.tRNA8-SeCTCA       | 5.87  | 0.02  | 5.04E-02 | 0.39 |
| rRNA       | LSU-rRNA_Hsa-L208        | 7.16  | 0.02  | 5.12E-02 | 0.39 |
| scRNA      | HY4-L42                  | 1.44  | -0.04 | 5.17E-02 | 0.39 |
| mir-3p     | hsa-miR-25-3p            | 12.18 | -0.02 | 5.18E-02 | 0.39 |
| scRNA      | BC200-L140               | 7.01  | 0.02  | 5.18E-02 | 0.39 |
| tRNA       | chr19.tRNA2-GlyTCC       | 4.14  | 0.03  | 5.25E-02 | 0.39 |
| tRNA       | chr6.tRNA166-AlaAGC      | 1.77  | 0.05  | 5.38E-02 | 0.40 |
| mir-3p     | hsa-miR-103a-3p-L2       | 3.33  | -0.02 | 5.38E-02 | 0.40 |
| scRNA      | HY4-L89                  | 8.76  | -0.02 | 5.44E-02 | 0.40 |
| snRNA      | U2-L765                  | 2.07  | 0.04  | 5.50E-02 | 0.40 |
| rRNA       | LSU-rRNA_Hsa-L13         | 12.04 | 0.02  | 5.50E-02 | 0.40 |
| snRNA      | U2-L981                  | 4.06  | 0.04  | 5.53E-02 | 0.40 |
| mir-5p     | hsa-let-7i-5p            | 12.19 | -0.01 | 5.54E-02 | 0.40 |
| scRNA      | BC200-L155               | 2.70  | 0.04  | 5.57E-02 | 0.40 |
| piRNA      | piR-35982-L6             | 1.98  | -0.05 | 5.72E-02 | 0.41 |
| snRNA      | U2-L537                  | 2.76  | 0.04  | 5.82E-02 | 0.42 |
| snoRNA     | HBII-85-15               | 1.65  | 0.06  | 5.84E-02 | 0.42 |
| scRNA      | HY1-L137                 | 4.44  | 0.02  | 5.91E-02 | 0.42 |
| scRNA      | HY1-L260                 | 4.88  | 0.02  | 5.93E-02 | 0.42 |

|            |                         |       |       |          |      |
|------------|-------------------------|-------|-------|----------|------|
| rRNA       | 5S-L356                 | 5.32  | 0.02  | 6.01E-02 | 0.42 |
| mir-5p     | hsa-miR-25-5p           | 2.07  | -0.04 | 6.01E-02 | 0.42 |
| tRF3       | chr1.tRNA55-LysTTT-tRF3 | 2.49  | 0.04  | 6.01E-02 | 0.42 |
| snoRNA     | SNORD126                | 2.74  | -0.04 | 6.02E-02 | 0.42 |
| scRNA      | HY4-L37                 | 4.01  | -0.02 | 6.10E-02 | 0.42 |
| mir-3p     | hsa-miR-625-3p          | 4.68  | -0.02 | 6.12E-02 | 0.42 |
| tRNA       | chr6.tRNA172-SerTGA     | 1.90  | 0.05  | 6.15E-02 | 0.42 |
| scRNA      | HY1-L10                 | 1.56  | 0.04  | 6.19E-02 | 0.42 |
| scRNA      | HY4-L149                | 1.76  | 0.03  | 6.32E-02 | 0.43 |
| snRNA      | U1-L4                   | 8.27  | 0.03  | 6.40E-02 | 0.43 |
| tRNA       | chr7.tRNA3-ArgCCT       | 5.38  | 0.02  | 6.45E-02 | 0.43 |
| mir-5p     | hsa-miR-146a-5p         | 9.39  | -0.02 | 6.48E-02 | 0.43 |
| tRF3       | chr22.tRNA1-SeCTCA-tRF3 | 4.56  | 0.03  | 6.48E-02 | 0.43 |
| snRNA      | U6-L1696                | 1.91  | -0.04 | 6.52E-02 | 0.43 |
| mir-5p     | hsa-miR-3184-5p         | 7.99  | -0.01 | 6.56E-02 | 0.43 |
| scRNA      | BC200-L95               | 3.20  | 0.03  | 6.60E-02 | 0.43 |
| mir-5p3pno | hsa-miR-152             | 5.59  | -0.02 | 6.61E-02 | 0.43 |
| scRNA      | HY1-L352                | 1.78  | 0.05  | 6.67E-02 | 0.43 |
| mir-3p     | hsa-miR-1273g-3p        | 5.83  | 0.02  | 6.73E-02 | 0.43 |
| scRNA      | HY1-L67                 | 6.00  | 0.02  | 6.73E-02 | 0.43 |
| mir-3p     | hsa-miR-3158-3p         | 3.71  | -0.02 | 6.78E-02 | 0.43 |
| scRNA      | HY1-L443                | 7.16  | 0.02  | 6.78E-02 | 0.43 |
| scRNA      | HY1-L300                | 2.19  | 0.03  | 6.87E-02 | 0.44 |
| tRNA       | chr7.tRNA7-CysGCA       | 7.06  | 0.03  | 6.88E-02 | 0.44 |
| mir-3p     | hsa-miR-27b-3p          | 8.94  | -0.02 | 6.96E-02 | 0.44 |
| scRNA      | HY1-L100                | 8.91  | 0.02  | 6.97E-02 | 0.44 |
| scRNA      | BC200-L76               | 2.55  | 0.03  | 7.05E-02 | 0.44 |
| mir-3p     | hsa-miR-450a-3p         | 1.54  | -0.05 | 7.07E-02 | 0.44 |
| mir-5p     | hsa-miR-99b-5p          | 6.89  | -0.02 | 7.08E-02 | 0.44 |
| scRNA      | HY5                     | 1.57  | 0.04  | 7.23E-02 | 0.45 |
| mir-3p     | hsa-miR-30d-3p          | 1.67  | -0.04 | 7.31E-02 | 0.45 |
| tRNA       | chr17.tRNA17-SupTTA     | 2.90  | 0.04  | 7.32E-02 | 0.45 |
| tRNA       | chr6.tRNA4-ArgTCG       | 2.79  | 0.04  | 7.34E-02 | 0.45 |
| snoRNA     | U96a                    | 3.47  | 0.04  | 7.49E-02 | 0.45 |
| rRNA       | 5S-L1214                | 1.33  | 0.04  | 7.49E-02 | 0.45 |
| scRNA      | HY1-L435                | 3.49  | 0.02  | 7.49E-02 | 0.45 |
| snoRNA     | U36B                    | 1.73  | 0.06  | 7.56E-02 | 0.45 |
| snoRNA     | mgU2-19/30              | 3.71  | 0.02  | 7.56E-02 | 0.45 |
| mir-3p     | hsa-miR-323b-3p         | 3.62  | -0.03 | 7.57E-02 | 0.45 |
| mir-3p     | hsa-miR-181a-2-3p       | 4.18  | -0.02 | 7.59E-02 | 0.45 |
| rRNA       | 5S-L112                 | 10.83 | 0.02  | 7.71E-02 | 0.45 |
| snoRNA     | ACA61                   | 2.02  | 0.06  | 7.74E-02 | 0.45 |
| scRNA      | HY1-L243                | 6.54  | 0.02  | 7.83E-02 | 0.46 |



|            |                     |       |       |          |      |
|------------|---------------------|-------|-------|----------|------|
| snoRNA     | U26                 | 8.56  | 0.03  | 7.96E-02 | 0.46 |
| mir-5p3pno | hsa-miR-103b        | 8.26  | -0.02 | 8.04E-02 | 0.47 |
| piRNA      | piR-61646-L2        | 8.65  | -0.02 | 8.10E-02 | 0.47 |
| snRNA      | U6-L1561            | 2.12  | 0.05  | 8.11E-02 | 0.47 |
| scRNA      | HY1                 | 6.00  | 0.02  | 8.12E-02 | 0.47 |
| snoRNA     | U73a                | 1.79  | 0.05  | 8.18E-02 | 0.47 |
| mir-5p     | hsa-miR-452-5p      | 1.74  | -0.04 | 8.37E-02 | 0.47 |
| snoRNA     | U29                 | 5.29  | 0.03  | 8.37E-02 | 0.47 |
| rRNA       | LSU-rRNA_Hsa-L48    | 1.64  | 0.04  | 8.40E-02 | 0.47 |
| snoRNA     | U76                 | 2.36  | 0.05  | 8.48E-02 | 0.48 |
| rRNA       | LSU-rRNA_Hsa-L345   | 2.84  | 0.03  | 8.60E-02 | 0.48 |
| mir-5p3pno | hsa-miR-206         | 2.36  | 0.05  | 8.64E-02 | 0.48 |
| snRNA      | U2-L166             | 3.45  | 0.06  | 8.68E-02 | 0.48 |
| snRNA      | U1-L8               | 6.14  | 0.02  | 8.83E-02 | 0.49 |
| mir-5p3pno | hsa-miR-1301        | 4.06  | -0.02 | 8.86E-02 | 0.49 |
| rRNA       | LSU-rRNA_Hsa-L19    | 2.10  | 0.03  | 8.86E-02 | 0.49 |
| snoRNA     | U27                 | 4.90  | 0.03  | 9.02E-02 | 0.49 |
| piRNA      | piR-34536           | 5.56  | 0.02  | 9.05E-02 | 0.49 |
| mir-5p3pno | hsa-miR-1294        | 1.62  | -0.04 | 9.07E-02 | 0.49 |
| rRNA       | SSU-rRNA_Hsa-L26    | 3.24  | 0.03  | 9.09E-02 | 0.49 |
| snoRNA     | U22                 | 3.81  | 0.04  | 9.11E-02 | 0.49 |
| scRNA      | HY1-L434            | 6.45  | 0.02  | 9.19E-02 | 0.50 |
| snoRNA     | HBII-251            | 3.81  | 0.04  | 9.22E-02 | 0.50 |
| tRNA       | chr1.tRNA58-LeuCAA  | 3.40  | 0.02  | 9.30E-02 | 0.50 |
| tRNA       | chr1.tRNA116-GluCTC | 3.79  | 0.02  | 9.34E-02 | 0.50 |
| scRNA      | HY4-L150            | 3.26  | 0.03  | 9.36E-02 | 0.50 |
| mir-3p     | hsa-miR-4677-3p     | 1.78  | 0.03  | 9.43E-02 | 0.50 |
| tRNA       | chr3.tRNA7-CysGCA   | 1.80  | -0.03 | 0.10     | 0.50 |
| scRNA      | HY1-L223            | 6.19  | 0.02  | 0.10     | 0.50 |
| mir-3p     | hsa-miR-424-3p      | 4.70  | -0.02 | 0.10     | 0.51 |
| tRNA       | chr6.tRNA98-LeuAAG  | 2.93  | 0.04  | 0.10     | 0.51 |
| scRNA      | BC200-L156          | 2.60  | 0.02  | 0.10     | 0.51 |
| rRNA       | SSU-rRNA_Hsa-L65    | 4.29  | 0.02  | 0.10     | 0.51 |
| rRNA       | 5S-L997             | 1.97  | 0.05  | 0.10     | 0.51 |
| piRNA      | piR-51810-L2        | 8.21  | 0.02  | 0.10     | 0.51 |
| rRNA       | 5S-L1196            | 2.21  | 0.04  | 0.10     | 0.51 |
| rRNA       | LSU-rRNA_Hsa-L214   | 2.13  | 0.06  | 0.10     | 0.51 |
| scRNA      | HY1-L175            | 2.06  | 0.04  | 0.10     | 0.51 |
| rRNA       | LSU-rRNA_Hsa-L403   | 9.95  | 0.01  | 0.10     | 0.51 |
| snoRNA     | U21                 | 4.61  | 0.03  | 0.10     | 0.51 |
| mir-3p     | hsa-miR-24-3p       | 8.44  | -0.02 | 0.10     | 0.51 |
| mir-5p     | hsa-miR-486-5p      | 13.44 | -0.02 | 0.10     | 0.51 |
| snoRNA     | U104                | 7.46  | 0.03  | 0.10     | 0.51 |

|            |                     |       |       |      |      |
|------------|---------------------|-------|-------|------|------|
| snoRNA     | HBII-180A           | 2.03  | 0.05  | 0.10 | 0.51 |
| piRNA      | piR-31925-L9        | 13.82 | -0.02 | 0.10 | 0.51 |
| scRNA      | HY3-L239            | 1.81  | 0.03  | 0.10 | 0.51 |
| rRNA       | LSU-rRNA_Hsa-L58    | 7.02  | 0.02  | 0.10 | 0.51 |
| scRNA      | HY3-L372            | 2.47  | 0.03  | 0.10 | 0.51 |
| mir-5p3pno | hsa-miR-4461        | 2.06  | 0.04  | 0.10 | 0.51 |
| tRNA       | chr11.tRNA12-ProTGG | 8.16  | -0.02 | 0.11 | 0.51 |
| tRNA       | chr1.tRNA131-GlyCCC | 7.00  | -0.04 | 0.11 | 0.51 |
| snRNA      | U5-L67              | 7.03  | 0.02  | 0.11 | 0.51 |
| scRNA      | HY4-L58             | 3.81  | -0.02 | 0.11 | 0.51 |
| rRNA       | 5S-L111             | 10.31 | 0.01  | 0.11 | 0.51 |
| scRNA      | HY4-L134            | 2.51  | -0.03 | 0.11 | 0.51 |
| snoRNA     | U85                 | 3.06  | 0.03  | 0.11 | 0.51 |
| scRNA      | HY1-L304            | 3.88  | 0.02  | 0.11 | 0.52 |
| mir-5p     | hsa-miR-550a-5p-L2  | 3.39  | -0.02 | 0.11 | 0.52 |
| piRNA      | piR-33151-L8        | 4.43  | 0.02  | 0.11 | 0.52 |
| tRNA       | chr2.tRNA3-AlaAGC   | 3.59  | 0.03  | 0.11 | 0.52 |
| tRNA       | chr6.tRNA78-LeuAAG  | 2.00  | 0.05  | 0.11 | 0.52 |
| scRNA      | HY4-L83             | 4.19  | -0.02 | 0.11 | 0.52 |
| scRNA      | HY3-L35             | 2.20  | 0.04  | 0.11 | 0.52 |
| mir-5p     | hsa-miR-483-5p      | 4.02  | 0.03  | 0.11 | 0.53 |
| scRNA      | HY4-L12             | 5.27  | -0.01 | 0.11 | 0.53 |
| snoRNA     | U41                 | 2.49  | 0.04  | 0.11 | 0.53 |
| snRNA      | U1-L78              | 1.40  | -0.03 | 0.11 | 0.53 |
| scRNA      | HY4-L129            | 3.45  | -0.02 | 0.11 | 0.53 |
| snRNA      | U2-L709             | 3.25  | 0.03  | 0.12 | 0.53 |
| scRNA      | HY1-L287            | 6.16  | 0.02  | 0.12 | 0.53 |
| mir-3p     | hsa-miR-200b-3p     | 1.87  | 0.04  | 0.12 | 0.53 |
| snoRNA     | HBII-99B            | 1.87  | 0.05  | 0.12 | 0.53 |
| rRNA       | 5S-L1234            | 5.10  | 0.02  | 0.12 | 0.53 |
| piRNA      | piR-58356           | 5.40  | -0.02 | 0.12 | 0.53 |
| rRNA       | LSU-rRNA_Hsa-L220   | 4.41  | -0.02 | 0.12 | 0.54 |
| tRNA       | chr15.tRNA2-LysCTT  | 6.59  | 0.01  | 0.12 | 0.54 |
| mir-5p3pno | hsa-miR-1246        | 5.82  | 0.03  | 0.12 | 0.54 |
| mir-5p     | hsa-miR-192-5p      | 8.24  | -0.01 | 0.12 | 0.54 |
| snRNA      | U1-L33              | 2.56  | 0.03  | 0.12 | 0.55 |
| scRNA      | HY1-L179            | 6.39  | 0.02  | 0.12 | 0.55 |
| rRNA       | LSU-rRNA_Hsa-L66    | 1.86  | 0.04  | 0.12 | 0.55 |
| rRNA       | LSU-rRNA_Hsa-L185   | 2.41  | -0.03 | 0.13 | 0.55 |
| mir-5p     | hsa-miR-181a-5p-L2  | 8.55  | -0.01 | 0.13 | 0.55 |
| piRNA      | piR-31115-L4        | 7.28  | 0.02  | 0.13 | 0.55 |
| mir-5p     | hsa-miR-330-5p      | 1.63  | 0.03  | 0.13 | 0.55 |
| scRNA      | HY1-L184            | 3.77  | 0.02  | 0.13 | 0.55 |

|            |                          |       |       |      |      |
|------------|--------------------------|-------|-------|------|------|
| snoRNA     | snR39B                   | 5.72  | 0.03  | 0.13 | 0.56 |
| scRNA      | HY1-L409                 | 2.73  | 0.02  | 0.13 | 0.57 |
| rRNA       | 5S-L578                  | 2.37  | 0.03  | 0.13 | 0.57 |
| rRNA       | SSU-rRNA_Hsa-L72         | 14.26 | 0.01  | 0.13 | 0.57 |
| tRNA       | chr1.tRNA88-PseudoCCT    | 6.19  | -0.02 | 0.13 | 0.57 |
| tRF5       | chr1.tRNA130-ValCAC-tRF5 | 2.38  | 0.03  | 0.13 | 0.57 |
| mir-5p     | hsa-miR-340-5p           | 6.42  | -0.02 | 0.13 | 0.57 |
| snRNA      | U3-L4                    | 1.56  | -0.03 | 0.13 | 0.57 |
| piRNA      | piR-49143                | 11.96 | -0.01 | 0.14 | 0.57 |
| snRNA      | U2-L388                  | 3.41  | 0.02  | 0.14 | 0.57 |
| mir-3p     | hsa-miR-3529-3p          | 7.65  | -0.01 | 0.14 | 0.57 |
| rRNA       | 5S-L1075                 | 3.11  | 0.02  | 0.14 | 0.57 |
| mir-3p     | hsa-miR-3913-3p          | 1.59  | -0.03 | 0.14 | 0.57 |
| scRNA      | HY1-L393                 | 1.73  | 0.03  | 0.14 | 0.57 |
| piRNA      | piR-52416                | 1.72  | -0.04 | 0.14 | 0.57 |
| snRNA      | U2-L386                  | 2.89  | 0.03  | 0.14 | 0.57 |
| mir-3p     | hsa-miR-628-3p           | 3.76  | -0.02 | 0.14 | 0.57 |
| snoRNA     | HBII-316                 | 2.03  | -0.04 | 0.14 | 0.57 |
| snoRNA     | U106                     | 1.86  | 0.04  | 0.14 | 0.57 |
| scRNA      | HY1-L295                 | 4.37  | 0.02  | 0.14 | 0.57 |
| snoRNA     | U51                      | 2.71  | 0.04  | 0.14 | 0.57 |
| snRNA      | U5-L2                    | 6.33  | 0.02  | 0.14 | 0.57 |
| tRNA       | chr17.tRNA3-GlnCTG       | 6.70  | 0.01  | 0.14 | 0.57 |
| snoRNA     | HBII-135                 | 5.06  | 0.03  | 0.14 | 0.57 |
| rRNA       | LSU-rRNA_Hsa-L84         | 2.85  | 0.03  | 0.14 | 0.57 |
| scRNA      | HY3-L140                 | 2.65  | 0.03  | 0.14 | 0.57 |
| mir-5p     | hsa-miR-214-5p           | 1.57  | -0.04 | 0.14 | 0.57 |
| rRNA       | 5S-L500                  | 1.78  | 0.03  | 0.14 | 0.57 |
| tRNA       | chr17.tRNA16-GlnTTG      | 2.36  | 0.02  | 0.14 | 0.57 |
| tRNA       | chr1.tRNA81-AspGTC       | 4.35  | 0.02  | 0.14 | 0.57 |
| scRNA      | HY4-L114                 | 2.44  | -0.02 | 0.14 | 0.57 |
| mir-5p3pno | hsa-miR-378d-L2          | 1.37  | 0.03  | 0.14 | 0.57 |
| rRNA       | LSU-rRNA_Hsa-L73         | 2.19  | 0.03  | 0.14 | 0.57 |
| snoRNA     | mgh28S-2411              | 6.56  | 0.02  | 0.14 | 0.57 |
| rRNA       | SSU-rRNA_Hsa-L30         | 11.12 | 0.01  | 0.15 | 0.57 |
| snoRNA     | E3                       | 2.67  | -0.02 | 0.15 | 0.57 |
| snRNA      | U1-L38                   | 1.64  | 0.03  | 0.15 | 0.57 |
| tRNA       | chr13.tRNA2-PseudoCTC    | 4.77  | -0.01 | 0.15 | 0.57 |
| tRF5       | chr14.tRNA8-CysGCA-tRF5  | 2.18  | -0.03 | 0.15 | 0.57 |
| rRNA       | 5S-L389                  | 1.35  | 0.03  | 0.15 | 0.57 |
| rRNA       | 5S-L21                   | 2.71  | 0.02  | 0.15 | 0.57 |
| snoRNA     | U61                      | 5.55  | 0.02  | 0.15 | 0.57 |
| rRNA       | LSU-rRNA_Hsa-L247        | 1.53  | 0.03  | 0.15 | 0.57 |

|            |                          |       |       |      |      |
|------------|--------------------------|-------|-------|------|------|
| tRNA       | chr7.tRNA8-CysGCA        | 1.87  | 0.04  | 0.15 | 0.57 |
| tRNA       | chr13.tRNA5-GluTTC       | 8.98  | 0.01  | 0.15 | 0.57 |
| rRNA       | 5S-L98                   | 9.83  | 0.01  | 0.15 | 0.57 |
| scRNA      | HY1-L439                 | 2.44  | 0.02  | 0.15 | 0.57 |
| mir-5p     | hsa-miR-1255b-5p-L2      | 1.62  | -0.03 | 0.15 | 0.57 |
| mir-3p     | hsa-miR-1306-3p          | 2.00  | -0.03 | 0.15 | 0.57 |
| mir-3p     | hsa-miR-323a-3p          | 3.26  | -0.03 | 0.15 | 0.57 |
| mir-5p     | hsa-miR-3614-5p          | 1.91  | -0.03 | 0.15 | 0.57 |
| piRNA      | piR-31925                | 11.30 | -0.02 | 0.15 | 0.57 |
| mir-3p     | hsa-miR-542-3p           | 3.59  | 0.03  | 0.15 | 0.58 |
| rRNA       | 5S-L583                  | 2.69  | 0.04  | 0.15 | 0.58 |
| scRNA      | HY1-L149                 | 3.78  | 0.02  | 0.15 | 0.58 |
| mir-5p     | hsa-miR-629-5p           | 7.76  | 0.01  | 0.15 | 0.58 |
| rRNA       | 5S-L108                  | 11.53 | 0.01  | 0.16 | 0.58 |
| rRNA       | 5S-L957                  | 1.43  | -0.03 | 0.16 | 0.58 |
| mir-5p     | hsa-miR-454-5p           | 2.36  | -0.02 | 0.16 | 0.59 |
| mir-5p3pno | hsa-miR-326              | 1.98  | -0.02 | 0.16 | 0.59 |
| mir-5p     | hsa-miR-32-5p            | 3.62  | -0.02 | 0.16 | 0.59 |
| mir-3p     | hsa-miR-411-3p           | 1.75  | -0.04 | 0.16 | 0.59 |
| mir-5p3pno | hsa-miR-320c             | 4.43  | 0.01  | 0.16 | 0.60 |
| snoRNA     | HBII-382                 | 2.17  | -0.03 | 0.16 | 0.60 |
| scRNA      | BC200-L72                | 1.58  | -0.04 | 0.16 | 0.60 |
| tRF5       | chr16.tRNA23-LysTTT-tRF5 | 3.56  | 0.03  | 0.16 | 0.60 |
| piRNA      | piR-44716                | 4.74  | 0.07  | 0.16 | 0.60 |
| tRF5       | chr17.tRNA25-SeCTCA-tRF5 | 2.25  | 0.02  | 0.17 | 0.60 |
| snoRNA     | U25                      | 5.20  | 0.03  | 0.17 | 0.61 |
| snoRNA     | U64                      | 2.08  | -0.03 | 0.17 | 0.61 |
| tRNA       | chr17.tRNA14-ThrCGT      | 1.87  | 0.03  | 0.17 | 0.61 |
| scRNA      | HY4-L116                 | 3.88  | -0.02 | 0.17 | 0.61 |
| rRNA       | 5S-L254                  | 2.29  | 0.02  | 0.17 | 0.61 |
| scRNA      | HY5-L9                   | 1.40  | 0.03  | 0.17 | 0.61 |
| snoRNA     | HBI-43                   | 3.60  | 0.03  | 0.17 | 0.61 |
| scRNA      | BC200-L24                | 2.86  | 0.03  | 0.17 | 0.61 |
| piRNA      | piR-31447                | 1.47  | 0.04  | 0.17 | 0.61 |
| rRNA       | LSU-rRNA_Hsa-L93         | 7.67  | 0.01  | 0.17 | 0.61 |
| mir-3p     | hsa-miR-423-3p           | 8.89  | -0.01 | 0.17 | 0.61 |
| rRNA       | LSU-rRNA_Hsa-L53         | 2.22  | 0.02  | 0.17 | 0.62 |
| snoRNA     | U63                      | 5.92  | 0.02  | 0.17 | 0.62 |
| mir-5p     | hsa-miR-151a-5p          | 6.40  | -0.02 | 0.18 | 0.62 |
| snoRNA     | HBII-239                 | 4.71  | 0.02  | 0.18 | 0.62 |
| rRNA       | LSU-rRNA_Hsa-L140        | 4.43  | -0.02 | 0.18 | 0.62 |
| piRNA      | piR-33650                | 3.05  | 0.03  | 0.18 | 0.62 |
| snoRNA     | snR38B                   | 3.27  | 0.03  | 0.18 | 0.62 |

|            |                       |       |       |      |      |
|------------|-----------------------|-------|-------|------|------|
| rRNA       | LSU-rRNA_Hsa-L159     | 2.57  | 0.02  | 0.18 | 0.62 |
| scRNA      | HY5-L19               | 2.11  | 0.02  | 0.18 | 0.62 |
| snRNA      | U2-L1074              | 3.34  | 0.03  | 0.18 | 0.62 |
| snoRNA     | ACA36                 | 1.90  | -0.03 | 0.18 | 0.62 |
| tRNA       | chrX.tRNA4-ValTAC     | 5.20  | 0.02  | 0.18 | 0.62 |
| tRNA       | chr2.tRNA17-PseudoTTC | 7.07  | -0.02 | 0.18 | 0.62 |
| scRNA      | BC200-L128            | 2.65  | 0.02  | 0.18 | 0.62 |
| mir-3p     | hsa-let-7f-2-3p       | 1.55  | -0.03 | 0.18 | 0.62 |
| rRNA       | 5S-L255               | 2.65  | 0.02  | 0.18 | 0.62 |
| mir-5p     | hsa-miR-200c-5p       | 2.02  | -0.04 | 0.18 | 0.62 |
| scRNA      | HY1-L279              | 4.02  | 0.01  | 0.18 | 0.62 |
| scRNA      | HY4-L57               | 2.80  | -0.02 | 0.18 | 0.62 |
| snoRNA     | SNORD125              | 1.69  | 0.03  | 0.19 | 0.62 |
| piRNA      | piR-31925-L8          | 7.36  | -0.02 | 0.19 | 0.62 |
| piRNA      | piR-34804             | 4.98  | -0.02 | 0.19 | 0.62 |
| mir-3p     | hsa-miR-199b-3p       | 7.58  | -0.01 | 0.19 | 0.62 |
| scRNA      | HY3-L479              | 2.10  | -0.03 | 0.19 | 0.62 |
| snRNA      | U1-L7                 | 6.15  | 0.01  | 0.19 | 0.62 |
| piRNA      | piR-49144             | 7.05  | -0.01 | 0.19 | 0.62 |
| rRNA       | LSU-rRNA_Hsa-L132     | 10.51 | 0.01  | 0.19 | 0.63 |
| snoRNA     | U36A                  | 1.72  | -0.04 | 0.19 | 0.63 |
| mir-5p     | hsa-miR-23a-5p        | 1.78  | 0.02  | 0.19 | 0.63 |
| snoRNA     | U30                   | 6.13  | 0.03  | 0.19 | 0.63 |
| rRNA       | LSU-rRNA_Hsa-L382     | 13.70 | 0.01  | 0.19 | 0.63 |
| rRNA       | 5S-L758               | 2.59  | 0.02  | 0.19 | 0.63 |
| rRNA       | LSU-rRNA_Hsa-L193     | 7.16  | 0.01  | 0.19 | 0.63 |
| scRNA      | HY1-L342              | 1.37  | 0.03  | 0.19 | 0.63 |
| snoRNA     | U44                   | 6.36  | 0.02  | 0.19 | 0.63 |
| snoRNA     | HBII-210              | 5.47  | 0.02  | 0.19 | 0.63 |
| rRNA       | 5S-L612               | 2.86  | 0.02  | 0.19 | 0.63 |
| mir-3p     | hsa-miR-148a-3p       | 13.46 | -0.01 | 0.19 | 0.63 |
| rRNA       | LSU-rRNA_Hsa-L278     | 2.72  | 0.02  | 0.20 | 0.63 |
| snoRNA     | ACA53                 | 3.01  | 0.03  | 0.20 | 0.63 |
| piRNA      | piR-35469             | 1.70  | -0.03 | 0.20 | 0.63 |
| mir-5p3pno | hsa-miR-4488          | 1.35  | 0.03  | 0.20 | 0.63 |
| rRNA       | 5S-L1115              | 1.30  | 0.03  | 0.20 | 0.63 |
| snoRNA     | U42B                  | 4.22  | 0.03  | 0.20 | 0.63 |
| rRNA       | 5S-L573               | 3.03  | 0.02  | 0.20 | 0.63 |
| mir-3p     | hsa-miR-221-3p        | 7.16  | -0.01 | 0.20 | 0.63 |
| tRNA       | chr6.tRNA31-SerGCT    | 3.19  | 0.04  | 0.20 | 0.63 |
| mir-5p     | hsa-miR-625-5p        | 2.07  | -0.03 | 0.20 | 0.63 |
| snoRNA     | U38B                  | 2.96  | 0.03  | 0.20 | 0.63 |
| rRNA       | SSU-rRNA_Hsa-L34      | 5.52  | 0.01  | 0.20 | 0.63 |

|            |                         |       |       |      |      |
|------------|-------------------------|-------|-------|------|------|
| tRNA       | chr17.tRNA23-ArgCCG     | 3.40  | 0.02  | 0.20 | 0.63 |
| tRF5       | chr19.tRNA5-LysCTT-tRF5 | 4.33  | 0.02  | 0.20 | 0.63 |
| tRNA       | chr16.tRNA27-LeuTAG     | 2.12  | 0.03  | 0.20 | 0.63 |
| rRNA       | LSU-rRNA_Hsa-L2         | 9.24  | 0.02  | 0.20 | 0.63 |
| piRNA      | piR-36743               | 3.67  | 0.02  | 0.20 | 0.63 |
| rRNA       | LSU-rRNA_Hsa-L300       | 7.63  | -0.03 | 0.20 | 0.63 |
| scRNA      | BC200-L8                | 2.74  | 0.02  | 0.20 | 0.63 |
| mir-5p     | hsa-miR-1234-5p         | 14.77 | 0.02  | 0.20 | 0.63 |
| rRNA       | 5S-L1129                | 1.90  | 0.03  | 0.21 | 0.63 |
| tRNA       | chr1.tRNA39-GlyGCC      | 11.35 | -0.01 | 0.21 | 0.63 |
| tRNA       | chr16.tRNA17-LeuCAG     | 3.37  | 0.02  | 0.21 | 0.63 |
| scRNA      | BC200-L135              | 2.24  | 0.03  | 0.21 | 0.63 |
| scRNA      | HY1-L155                | 2.69  | 0.02  | 0.21 | 0.63 |
| tRNA       | chr5.tRNA22-AspGTC      | 1.97  | 0.03  | 0.21 | 0.63 |
| scRNA      | HY1-L397                | 3.27  | 0.02  | 0.21 | 0.63 |
| tRNA       | chr6.tRNA85-PseudoTTC   | 4.59  | 0.02  | 0.21 | 0.63 |
| snoRNA     | U84                     | 2.10  | 0.03  | 0.21 | 0.63 |
| tRNA       | chr1.tRNA99-ValCAC      | 8.58  | -0.01 | 0.21 | 0.63 |
| mir-3p     | hsa-miR-495-3p          | 2.88  | -0.03 | 0.21 | 0.63 |
| rRNA       | LSU-rRNA_Hsa-L203       | 5.91  | 0.01  | 0.21 | 0.63 |
| rRNA       | 5S-L78                  | 2.70  | 0.02  | 0.21 | 0.63 |
| scRNA      | BC200-L114              | 2.21  | -0.02 | 0.21 | 0.63 |
| rRNA       | 5S-L109                 | 9.56  | 0.01  | 0.21 | 0.63 |
| tRNA       | chr17.tRNA2-LysTTT      | 3.04  | 0.02  | 0.21 | 0.63 |
| scRNA      | HY4-L41                 | 1.86  | 0.02  | 0.21 | 0.63 |
| snRNA      | U1-L138                 | 3.38  | 0.02  | 0.21 | 0.63 |
| piRNA      | piR-31115-L2            | 6.67  | 0.01  | 0.21 | 0.63 |
| scRNA      | BC200-L60               | 2.38  | 0.03  | 0.21 | 0.63 |
| mir-5p     | hsa-let-7g-5p           | 11.06 | -0.01 | 0.21 | 0.63 |
| scRNA      | HY4-L162                | 1.65  | 0.02  | 0.21 | 0.63 |
| snoRNA     | ACA7                    | 2.30  | 0.04  | 0.21 | 0.63 |
| mir-5p     | hsa-miR-126-5p          | 6.05  | -0.01 | 0.21 | 0.63 |
| scRNA      | HY5-L11                 | 5.18  | 0.02  | 0.21 | 0.63 |
| tRNA       | chr1.tRNA33-Pseudo???   | 3.32  | 0.02  | 0.21 | 0.63 |
| snRNA      | U2-L205                 | 1.72  | 0.04  | 0.21 | 0.63 |
| mir-5p3pno | hsa-miR-451a            | 12.70 | -0.01 | 0.21 | 0.63 |
| piRNA      | piR-60565-L12           | 10.99 | 0.01  | 0.22 | 0.64 |
| rRNA       | 5S-L113                 | 10.34 | 0.01  | 0.22 | 0.64 |
| rRNA       | 5S-L104                 | 10.61 | 0.01  | 0.22 | 0.65 |
| mir-5p     | hsa-miR-9-5p-L3         | 3.09  | -0.02 | 0.22 | 0.65 |
| piRNA      | piR-33382               | 8.69  | -0.01 | 0.22 | 0.65 |
| scRNA      | HY4-L96                 | 3.68  | -0.01 | 0.22 | 0.65 |
| scRNA      | BC200-L23               | 3.06  | 0.02  | 0.22 | 0.65 |

|            |                          |       |       |      |      |
|------------|--------------------------|-------|-------|------|------|
| scRNA      | BC200-L85                | 1.96  | 0.02  | 0.22 | 0.65 |
| mir-5p3pno | hsa-miR-375              | 6.00  | -0.02 | 0.22 | 0.65 |
| mir-3p     | hsa-miR-1185-1-3p        | 2.25  | -0.03 | 0.23 | 0.65 |
| snoRNA     | U83A                     | 3.52  | 0.02  | 0.23 | 0.65 |
| rRNA       | SSU-rRNA_Hsa-L10         | 11.45 | 0.01  | 0.23 | 0.65 |
| mir-3p     | hsa-miR-125a-3p          | 3.83  | 0.02  | 0.23 | 0.65 |
| mir-5p     | hsa-miR-450b-5p          | 5.25  | 0.02  | 0.23 | 0.65 |
| snoRNA     | U18A                     | 6.81  | 0.02  | 0.23 | 0.65 |
| scRNA      | BC200-L93                | 1.59  | 0.04  | 0.23 | 0.65 |
| mir-3p     | hsa-miR-19a-3p           | 4.16  | -0.01 | 0.23 | 0.65 |
| scRNA      | HY1-L419                 | 3.95  | 0.01  | 0.23 | 0.65 |
| snRNA      | U2-L342                  | 5.41  | 0.02  | 0.23 | 0.65 |
| scRNA      | BC200-L139               | 3.27  | 0.02  | 0.23 | 0.65 |
| rRNA       | 5S-L97                   | 10.24 | 0.01  | 0.23 | 0.65 |
| snoRNA     | ACA58                    | 1.85  | -0.03 | 0.23 | 0.65 |
| mir-5p3pno | hsa-miR-3609             | 2.88  | -0.03 | 0.23 | 0.65 |
| mir-3p     | hsa-miR-15b-3p           | 3.61  | -0.02 | 0.23 | 0.65 |
| tRNA       | chr11.tRNA8-SerGCT       | 4.09  | 0.02  | 0.23 | 0.65 |
| rRNA       | LSU-rRNA_Hsa-L34         | 1.35  | 0.03  | 0.23 | 0.65 |
| snoRNA     | HBII-202                 | 6.44  | 0.02  | 0.23 | 0.65 |
| mir-3p     | hsa-miR-2115-3p          | 1.61  | -0.03 | 0.23 | 0.65 |
| tRNA       | chr17.tRNA20-MetCAT      | 1.87  | 0.03  | 0.23 | 0.65 |
| piRNA      | piR-35982-L11            | 1.95  | -0.03 | 0.23 | 0.65 |
| rRNA       | LSU-rRNA_Hsa-L42         | 1.88  | 0.02  | 0.24 | 0.65 |
| rRNA       | LSU-rRNA_Hsa-L348        | 1.92  | 0.03  | 0.24 | 0.65 |
| tRNA       | chr16.tRNA10-LysCTT      | 4.96  | 0.01  | 0.24 | 0.65 |
| mir-5p     | hsa-miR-411-5p           | 2.70  | -0.02 | 0.24 | 0.65 |
| tRNA       | chr6.tRNA30-ProCGG       | 10.88 | -0.01 | 0.24 | 0.66 |
| rRNA       | LSU-rRNA_Hsa-L383        | 14.16 | 0.01  | 0.24 | 0.66 |
| tRF3       | chr19.tRNA9-PseudoTTT-tR | 1.65  | 0.03  | 0.24 | 0.66 |
| scRNA      | HY4-L44                  | 1.59  | 0.02  | 0.24 | 0.66 |
| piRNA      | piR-61648                | 2.28  | 0.02  | 0.24 | 0.66 |
| snRNA      | U2-L825                  | 3.19  | 0.02  | 0.24 | 0.66 |
| piRNA      | piR-41588                | 1.60  | 0.03  | 0.24 | 0.66 |
| rRNA       | LSU-rRNA_Hsa-L165        | 7.53  | -0.01 | 0.24 | 0.66 |
| tRF5       | chr14.tRNA4-ThrTGT-tRF5  | 2.23  | 0.02  | 0.24 | 0.66 |
| piRNA      | piR-36376                | 2.64  | 0.02  | 0.24 | 0.66 |
| tRNA       | chr7.tRNA21-CysGCA       | 1.68  | -0.03 | 0.24 | 0.66 |
| tRNA       | chr1.tRNA5-GluTTC        | 5.89  | -0.02 | 0.24 | 0.66 |
| snRNA      | U1-L174                  | 1.76  | 0.02  | 0.24 | 0.66 |
| mir-5p3pno | hsa-miR-3672             | 1.53  | -0.03 | 0.25 | 0.66 |
| tRNA       | chr6.tRNA83-LeuTAA       | 2.22  | 0.02  | 0.25 | 0.66 |
| tRF5       | chr20.tRNA7-PseudoCTC-tR | 1.39  | 0.03  | 0.25 | 0.66 |

|            |                         |       |       |      |      |
|------------|-------------------------|-------|-------|------|------|
| tRNA       | chr17.tRNA13-GlyCCC     | 5.82  | -0.01 | 0.25 | 0.66 |
| piRNA      | piR-31986               | 8.37  | 0.01  | 0.25 | 0.66 |
| rRNA       | 5S-L1255                | 1.70  | 0.02  | 0.25 | 0.66 |
| mir-3p     | hsa-miR-143-3p          | 9.70  | -0.01 | 0.25 | 0.66 |
| snoRNA     | U24                     | 2.09  | 0.03  | 0.25 | 0.66 |
| tRF3       | chr6.tRNA37-ValAAC-tRF3 | 12.93 | 0.02  | 0.25 | 0.66 |
| scRNA      | HY1-L133                | 2.77  | 0.01  | 0.25 | 0.66 |
| scRNA      | BC200-L164              | 2.31  | 0.02  | 0.25 | 0.66 |
| piRNA      | piR-36742               | 5.16  | 0.01  | 0.25 | 0.66 |
| scRNA      | HY1-L183                | 2.44  | 0.02  | 0.25 | 0.66 |
| snRNA      | U2-L63                  | 2.16  | -0.02 | 0.25 | 0.66 |
| scRNA      | BC200-L159              | 1.51  | 0.03  | 0.25 | 0.66 |
| tRNA       | chr6.tRNA37-ValAAC      | 9.05  | 0.01  | 0.25 | 0.66 |
| mir-5p     | hsa-miR-409-5p          | 1.55  | -0.04 | 0.25 | 0.66 |
| mir-3p     | hsa-miR-18a-3p          | 2.18  | -0.02 | 0.25 | 0.66 |
| scRNA      | BC200-L49               | 4.36  | 0.01  | 0.25 | 0.66 |
| scRNA      | BC200-L167              | 1.58  | 0.02  | 0.26 | 0.66 |
| snoRNA     | U18C                    | 1.82  | 0.04  | 0.26 | 0.66 |
| mir-3p     | hsa-miR-185-3p          | 2.98  | -0.02 | 0.26 | 0.66 |
| mir-3p     | hsa-miR-374a-3p         | 3.85  | -0.01 | 0.26 | 0.66 |
| scRNA      | HY1-L259                | 5.48  | 0.01  | 0.26 | 0.66 |
| mir-5p     | hsa-miR-93-5p           | 7.11  | -0.01 | 0.26 | 0.66 |
| rRNA       | SSU-rRNA_Hsa-L67        | 3.08  | -0.02 | 0.26 | 0.66 |
| mir-5p     | hsa-miR-130b-5p         | 4.40  | -0.02 | 0.26 | 0.66 |
| snoRNA     | U58B                    | 4.91  | 0.02  | 0.26 | 0.66 |
| mir-5p3pno | hsa-miR-598             | 1.77  | 0.03  | 0.26 | 0.66 |
| scRNA      | HY4-L127                | 11.00 | -0.01 | 0.26 | 0.66 |
| scRNA      | BC200-L37               | 6.33  | 0.01  | 0.26 | 0.66 |
| scRNA      | HY4-L11                 | 1.48  | -0.03 | 0.26 | 0.66 |
| snRNA      | U2-L302                 | 4.05  | 0.02  | 0.26 | 0.66 |
| tRF3       | chr18.tRNA1-GluCTC-tRF3 | 2.27  | 0.03  | 0.26 | 0.66 |
| rRNA       | LSU-rRNA_Hsa-L366       | 4.93  | -0.02 | 0.26 | 0.66 |
| scRNA      | HY4-L3                  | 2.42  | -0.01 | 0.26 | 0.66 |
| snoRNA     | U16                     | 2.75  | -0.02 | 0.26 | 0.66 |
| mir-5p     | hsa-miR-15b-5p          | 2.72  | -0.02 | 0.26 | 0.66 |
| mir-5p     | hsa-miR-3605-5p         | 2.60  | 0.02  | 0.26 | 0.66 |
| tRF5       | chr20.tRNA6-LeuAAG-tRF5 | 3.01  | -0.02 | 0.26 | 0.66 |
| rRNA       | LSU-rRNA_Hsa-L200       | 2.74  | 0.02  | 0.26 | 0.66 |
| rRNA       | 5S-L819                 | 2.01  | 0.02  | 0.26 | 0.66 |
| tRNA       | chr13.tRNA3-GluTTC      | 10.17 | 0.01  | 0.27 | 0.66 |
| scRNA      | BC200-L148              | 2.11  | 0.03  | 0.27 | 0.67 |
| snoRNA     | HBII-99                 | 4.91  | 0.02  | 0.27 | 0.67 |
| rRNA       | LSU-rRNA_Hsa-L355       | 3.31  | -0.02 | 0.27 | 0.67 |



|            |                          |       |       |      |      |
|------------|--------------------------|-------|-------|------|------|
| rRNA       | LSU-rRNA_Hsa-L308        | 1.76  | 0.03  | 0.27 | 0.67 |
| rRNA       | LSU-rRNA_Hsa-L212        | 3.25  | 0.01  | 0.27 | 0.67 |
| scRNA      | HY4-L53                  | 3.75  | -0.01 | 0.27 | 0.67 |
| snoRNA     | U93                      | 1.72  | 0.03  | 0.27 | 0.67 |
| snoRNA     | U99                      | 3.13  | 0.02  | 0.27 | 0.68 |
| rRNA       | LSU-rRNA_Hsa-L64         | 1.52  | -0.02 | 0.27 | 0.68 |
| scRNA      | BC200-L20                | 1.94  | 0.03  | 0.28 | 0.68 |
| snoRNA     | ACA45                    | 6.69  | -0.01 | 0.28 | 0.68 |
| rRNA       | SSU-rRNA_Hsa-L46         | 6.10  | 0.02  | 0.28 | 0.68 |
| mir-5p     | hsa-miR-125b-5p-L2       | 3.27  | 0.02  | 0.28 | 0.68 |
| snRNA      | U1-L47                   | 1.98  | 0.02  | 0.28 | 0.69 |
| scRNA      | BC200-L32                | 2.06  | -0.03 | 0.28 | 0.69 |
| mir-5p3pno | hsa-miR-410              | 1.74  | -0.03 | 0.29 | 0.69 |
| piRNA      | piR-36041                | 7.32  | -0.01 | 0.29 | 0.69 |
| scRNA      | HY4-L130                 | 14.43 | 0.01  | 0.29 | 0.69 |
| rRNA       | 5S-L317                  | 1.26  | -0.03 | 0.29 | 0.69 |
| rRNA       | 5S-L101                  | 9.06  | 0.01  | 0.29 | 0.69 |
| mir-3p     | hsa-miR-29a-3p           | 5.96  | 0.01  | 0.29 | 0.70 |
| rRNA       | 5S-L803                  | 7.74  | 0.01  | 0.29 | 0.70 |
| mir-3p     | hsa-miR-340-3p           | 4.29  | -0.01 | 0.29 | 0.70 |
| scRNA      | HY3-L478                 | 8.12  | -0.01 | 0.29 | 0.70 |
| rRNA       | 5S-L829                  | 2.65  | 0.02  | 0.29 | 0.70 |
| snRNA      | U3-L75                   | 3.12  | 0.02  | 0.29 | 0.70 |
| tRNA       | chr1.tRNA96-PseudoCCT    | 8.20  | -0.01 | 0.29 | 0.70 |
| tRNA       | chr1.tRNA38-LeuCAG       | 3.68  | 0.02  | 0.29 | 0.70 |
| rRNA       | LSU-rRNA_Hsa-L249        | 7.95  | 0.01  | 0.29 | 0.70 |
| piRNA      | piR-35411-L4             | 2.53  | -0.02 | 0.30 | 0.71 |
| piRNA      | piR-31068-L10            | 2.13  | -0.02 | 0.30 | 0.71 |
| piRNA      | piR-60565-L4             | 12.26 | 0.01  | 0.30 | 0.71 |
| tRF5       | chr17.tRNA21-ArgCCT-tRF5 | 1.46  | -0.03 | 0.30 | 0.71 |
| snoRNA     | U15A                     | 2.09  | 0.03  | 0.30 | 0.71 |
| mir-5p     | hsa-miR-374a-5p          | 2.91  | -0.02 | 0.30 | 0.71 |
| rRNA       | 5S-L344                  | 2.37  | 0.02  | 0.30 | 0.71 |
| tRNA       | chr16.tRNA22-MetCAT      | 3.03  | 0.02  | 0.30 | 0.71 |
| piRNA      | piR-44984-L6             | 2.42  | -0.02 | 0.30 | 0.71 |
| snoRNA     | U97                      | 1.94  | 0.03  | 0.30 | 0.71 |
| mir-5p     | hsa-miR-3606-5p          | 2.63  | 0.03  | 0.30 | 0.71 |
| snoRNA     | U8-L17                   | 2.67  | 0.02  | 0.30 | 0.71 |
| snoRNA     | U47                      | 3.87  | 0.02  | 0.31 | 0.71 |
| mir-3p     | hsa-miR-21-3p            | 1.95  | 0.02  | 0.31 | 0.72 |
| piRNA      | piR-37525                | 1.54  | -0.03 | 0.31 | 0.72 |
| snRNA      | U2-L161                  | 12.39 | 0.02  | 0.31 | 0.72 |
| snoRNA     | U103B                    | 3.29  | 0.02  | 0.31 | 0.72 |

|            |                          |       |       |      |      |
|------------|--------------------------|-------|-------|------|------|
| scRNA      | HY4-L142                 | 3.10  | -0.01 | 0.31 | 0.72 |
| scRNA      | HY3-L82                  | 3.20  | -0.01 | 0.31 | 0.72 |
| mir-3p     | hsa-miR-92a-3p           | 11.39 | -0.01 | 0.31 | 0.72 |
| tRF5       | chr11.tRNA16-ValTAC-tRF5 | 1.57  | 0.03  | 0.31 | 0.72 |
| rRNA       | 5S-L107                  | 10.07 | 0.01  | 0.31 | 0.72 |
| mir-3p     | hsa-miR-139-3p           | 3.31  | -0.01 | 0.31 | 0.72 |
| tRF5       | chr18.tRNA3-PseudoTCC-tR | 1.35  | -0.02 | 0.31 | 0.72 |
| piRNA      | piR-33160                | 1.68  | 0.02  | 0.32 | 0.72 |
| scRNA      | HY3-L512                 | 2.06  | 0.03  | 0.32 | 0.72 |
| mir-5p3pno | hsa-miR-378g             | 2.04  | 0.02  | 0.32 | 0.72 |
| scRNA      | HY1-L3                   | 3.10  | 0.01  | 0.32 | 0.72 |
| tRNA       | chr6.tRNA175-SerGCT      | 2.06  | 0.03  | 0.32 | 0.72 |
| mir-5p     | hsa-miR-423-5p           | 3.96  | -0.01 | 0.32 | 0.72 |
| mir-5p     | hsa-miR-98-5p            | 6.17  | -0.01 | 0.32 | 0.72 |
| piRNA      | piR-61647-L4             | 3.62  | -0.01 | 0.32 | 0.72 |
| snRNA      | U14-L5                   | 4.25  | 0.01  | 0.32 | 0.72 |
| mir-3p     | hsa-miR-486-3p           | 10.93 | -0.01 | 0.32 | 0.72 |
| mir-5p3pno | hsa-miR-1278             | 1.56  | -0.03 | 0.32 | 0.72 |
| mir-5p3pno | hsa-miR-5096             | 2.21  | -0.03 | 0.32 | 0.72 |
| rRNA       | 5S-L731                  | 1.51  | -0.02 | 0.32 | 0.72 |
| mir-5p     | hsa-miR-92b-5p           | 2.27  | 0.02  | 0.32 | 0.72 |
| snoRNA     | U50B                     | 4.34  | -0.02 | 0.33 | 0.73 |
| mir-5p3pno | hsa-miR-1299             | 2.07  | -0.03 | 0.33 | 0.73 |
| tRNA       | chr6.tRNA133-ValCAC      | 2.93  | 0.01  | 0.33 | 0.73 |
| snRNA      | U2-L1001                 | 2.25  | -0.02 | 0.33 | 0.73 |
| piRNA      | piR-36716                | 2.87  | -0.02 | 0.33 | 0.73 |
| snRNA      | U5-L108                  | 2.22  | 0.02  | 0.33 | 0.74 |
| tRF3       | chr16.tRNA28-ProTGG-tRF3 | 1.99  | 0.02  | 0.33 | 0.74 |
| snoRNA     | ACA8                     | 2.21  | -0.03 | 0.33 | 0.74 |
| piRNA      | piR-33151-L9             | 3.44  | 0.01  | 0.33 | 0.74 |
| tRNA       | chr1.tRNA43-GlyGCC       | 6.87  | -0.01 | 0.33 | 0.74 |
| tRF3       | chr3.tRNA2-ValAAC-tRF3   | 4.15  | 0.01  | 0.33 | 0.74 |
| mir-3p     | hsa-miR-16-2-3p          | 7.97  | -0.01 | 0.33 | 0.74 |
| mir-5p     | hsa-miR-1292-5p          | 1.70  | -0.02 | 0.34 | 0.74 |
| piRNA      | piR-33065                | 4.52  | 0.01  | 0.34 | 0.74 |
| tRNA       | chr16.tRNA18-GlyGCC      | 1.78  | -0.02 | 0.34 | 0.74 |
| mir-3p     | hsa-miR-191-3p           | 1.89  | -0.02 | 0.34 | 0.74 |
| snRNA      | U3-L18                   | 6.00  | 0.02  | 0.34 | 0.74 |
| scRNA      | HY1-L37                  | 6.31  | 0.01  | 0.34 | 0.74 |
| tRNA       | chr2.tRNA23-GlnTTG       | 3.06  | 0.02  | 0.34 | 0.74 |
| scRNA      | HY4-L21                  | 2.22  | -0.01 | 0.34 | 0.74 |
| piRNA      | piR-36499                | 1.68  | 0.02  | 0.34 | 0.74 |
| mir-5p     | hsa-miR-24-2-5p          | 4.12  | -0.01 | 0.34 | 0.74 |

|            |                     |       |       |      |      |
|------------|---------------------|-------|-------|------|------|
| snoRNA     | U101                | 5.22  | 0.02  | 0.34 | 0.74 |
| rRNA       | LSU-rRNA_Hsa-L161   | 1.84  | 0.02  | 0.34 | 0.75 |
| rRNA       | LSU-rRNA_Hsa-L60    | 12.44 | 0.01  | 0.34 | 0.75 |
| mir-5p     | hsa-miR-148a-5p     | 4.17  | 0.01  | 0.35 | 0.75 |
| rRNA       | LSU-rRNA_Hsa-L41    | 1.50  | -0.02 | 0.35 | 0.75 |
| rRNA       | 5S-L363             | 1.50  | -0.02 | 0.35 | 0.75 |
| piRNA      | piR-43325-L2        | 2.34  | 0.02  | 0.35 | 0.75 |
| scRNA      | BC200-L7            | 2.61  | 0.02  | 0.35 | 0.75 |
| mir-5p     | hsa-miR-1307-5p     | 1.42  | 0.02  | 0.35 | 0.75 |
| snRNA      | U1-L43              | 1.94  | 0.02  | 0.35 | 0.75 |
| scRNA      | HY4-L100            | 3.24  | 0.02  | 0.35 | 0.75 |
| snoRNA     | U91                 | 2.25  | -0.03 | 0.35 | 0.75 |
| mir-5p3pno | hsa-miR-487b        | 1.50  | -0.03 | 0.35 | 0.75 |
| snRNA      | U1-L24              | 2.67  | 0.01  | 0.35 | 0.75 |
| snRNA      | U1-L17              | 1.83  | 0.03  | 0.35 | 0.75 |
| piRNA      | piR-50811           | 3.43  | 0.01  | 0.35 | 0.75 |
| scRNA      | HY3-L282            | 3.75  | 0.01  | 0.36 | 0.75 |
| mir-3p     | hsa-miR-23a-3p      | 6.59  | 0.01  | 0.36 | 0.75 |
| scRNA      | HY1-L247            | 1.49  | 0.02  | 0.36 | 0.75 |
| rRNA       | 5S-L995             | 3.46  | 0.03  | 0.36 | 0.75 |
| scRNA      | HY1-L69             | 4.11  | 0.01  | 0.36 | 0.75 |
| rRNA       | 5S-L526             | 1.32  | 0.02  | 0.36 | 0.75 |
| snoRNA     | HBI-115             | 2.00  | -0.02 | 0.36 | 0.75 |
| rRNA       | LSU-rRNA_Hsa-L166   | 5.43  | 0.03  | 0.36 | 0.75 |
| rRNA       | LSU-rRNA_Hsa-L257   | 4.58  | 0.02  | 0.36 | 0.76 |
| scRNA      | BC200-L46           | 1.64  | 0.03  | 0.36 | 0.76 |
| mir-5p3pno | hsa-miR-1-L2        | 4.82  | -0.01 | 0.36 | 0.76 |
| scRNA      | BC200-L68           | 2.33  | 0.02  | 0.36 | 0.76 |
| piRNA      | piR-60565-L9        | 1.88  | 0.02  | 0.37 | 0.76 |
| mir-3p     | hsa-miR-539-3p      | 1.61  | -0.03 | 0.37 | 0.76 |
| scRNA      | BC200-L151          | 2.08  | 0.02  | 0.37 | 0.77 |
| mir-5p3pno | hsa-miR-95          | 2.72  | 0.01  | 0.37 | 0.77 |
| tRNA       | chr6.tRNA152-ValCAC | 8.52  | -0.01 | 0.37 | 0.77 |
| scRNA      | HY1-L190            | 2.42  | 0.02  | 0.37 | 0.77 |
| snoRNA     | HBII-85-10          | 1.77  | 0.02  | 0.37 | 0.77 |
| mir-5p     | hsa-miR-183-5p      | 7.53  | -0.01 | 0.37 | 0.77 |
| mir-3p     | hsa-miR-1285-3p     | 3.54  | 0.01  | 0.37 | 0.77 |
| mir-5p3pno | hsa-miR-511-L2      | 3.90  | -0.02 | 0.37 | 0.77 |
| rRNA       | 5S-L1270            | 1.27  | 0.02  | 0.37 | 0.77 |
| mir-5p     | hsa-miR-139-5p      | 6.03  | 0.01  | 0.38 | 0.77 |
| mir-5p     | hsa-miR-150-5p      | 5.10  | 0.01  | 0.38 | 0.77 |
| snRNA      | U7-L159             | 1.62  | 0.03  | 0.38 | 0.77 |
| scRNA      | HY4-L70             | 9.07  | -0.01 | 0.38 | 0.77 |

|            |                     |      |       |      |      |
|------------|---------------------|------|-------|------|------|
| mir-5p     | hsa-let-7a-5p       | 2.02 | 0.02  | 0.38 | 0.77 |
| scRNA      | HY3-L359            | 1.92 | 0.03  | 0.38 | 0.77 |
| snoRNA     | U33                 | 4.23 | -0.01 | 0.38 | 0.78 |
| rRNA       | LSU-rRNA_Hsa-L178   | 3.24 | -0.02 | 0.38 | 0.78 |
| rRNA       | LSU-rRNA_Hsa-L252   | 2.98 | 0.01  | 0.38 | 0.78 |
| snoRNA     | U79                 | 1.72 | 0.03  | 0.38 | 0.78 |
| rRNA       | 5S-L586             | 2.14 | 0.01  | 0.38 | 0.78 |
| mir-5p     | hsa-miR-361-5p      | 3.48 | -0.01 | 0.38 | 0.78 |
| rRNA       | 5S-L472             | 2.70 | 0.01  | 0.39 | 0.78 |
| piRNA      | piR-32377           | 6.91 | -0.01 | 0.39 | 0.78 |
| scRNA      | BC200-L10           | 2.65 | 0.02  | 0.39 | 0.78 |
| rRNA       | 5S-L930             | 1.75 | 0.02  | 0.39 | 0.78 |
| mir-5p     | hsa-miR-505-5p      | 1.81 | 0.02  | 0.39 | 0.78 |
| snoRNA     | U20                 | 6.66 | -0.01 | 0.39 | 0.78 |
| rRNA       | 5S-L1014            | 1.63 | 0.02  | 0.39 | 0.78 |
| scRNA      | BC200-L4            | 3.40 | 0.01  | 0.39 | 0.78 |
| tRNA       | chr6.tRNA100-LeuCAA | 3.49 | 0.01  | 0.39 | 0.78 |
| rRNA       | 5S-L935             | 2.94 | 0.02  | 0.39 | 0.78 |
| snRNA      | U5-L76              | 2.57 | -0.02 | 0.39 | 0.78 |
| mir-5p3pno | hsa-miR-181d        | 3.90 | -0.01 | 0.39 | 0.78 |
| scRNA      | HY3-L525            | 1.38 | -0.02 | 0.39 | 0.78 |
| tRNA       | chr5.tRNA14-ProTGG  | 4.85 | -0.01 | 0.40 | 0.78 |
| mir-5p     | hsa-miR-27a-5p      | 4.98 | 0.01  | 0.40 | 0.78 |
| rRNA       | LSU-rRNA_Hsa-L251   | 7.46 | 0.01  | 0.40 | 0.78 |
| mir-5p3pno | hsa-miR-1250        | 1.50 | -0.02 | 0.40 | 0.78 |
| mir-5p3pno | hsa-miR-760         | 2.39 | -0.01 | 0.40 | 0.79 |
| snRNA      | U3-L205             | 4.79 | -0.01 | 0.40 | 0.79 |
| rRNA       | 5S-L194             | 2.89 | 0.01  | 0.40 | 0.79 |
| scRNA      | BC200-L67           | 4.19 | 0.01  | 0.40 | 0.79 |
| tRNA       | chr5.tRNA4-ValAAC   | 2.29 | -0.02 | 0.40 | 0.79 |
| mir-5p     | hsa-miR-194-5p      | 4.47 | -0.01 | 0.40 | 0.79 |
| snoRNA     | U83                 | 2.97 | -0.02 | 0.41 | 0.79 |
| rRNA       | LSU-rRNA_Hsa-L297   | 1.90 | -0.02 | 0.41 | 0.79 |
| snoRNA     | U74                 | 5.78 | 0.02  | 0.41 | 0.79 |
| snoRNA     | U32A                | 4.08 | 0.02  | 0.41 | 0.79 |
| rRNA       | LSU-rRNA_Hsa-L39    | 7.57 | 0.01  | 0.41 | 0.79 |
| rRNA       | 5S-L688             | 4.43 | -0.01 | 0.41 | 0.80 |
| mir-3p     | hsa-miR-374b-3p     | 2.49 | 0.02  | 0.41 | 0.80 |
| scRNA      | HY1-L263            | 2.72 | 0.01  | 0.41 | 0.80 |
| snRNA      | U1-L45              | 6.78 | 0.01  | 0.41 | 0.80 |
| mir-5p     | hsa-miR-10a-5p      | 8.93 | -0.01 | 0.41 | 0.80 |
| mir-5p     | hsa-miR-144-5p      | 5.62 | 0.01  | 0.41 | 0.80 |
| scRNA      | BC200-L108          | 2.02 | 0.02  | 0.41 | 0.80 |

|            |                          |       |       |      |      |
|------------|--------------------------|-------|-------|------|------|
| mir-3p     | hsa-miR-29c-3p           | 1.99  | 0.02  | 0.41 | 0.80 |
| tRF5       | chr3.tRNA9-PseudoTTG-tRF | 1.99  | -0.02 | 0.41 | 0.80 |
| scRNA      | HY3-L203                 | 1.78  | 0.01  | 0.41 | 0.80 |
| mir-5p3pno | hsa-miR-942              | 3.31  | -0.01 | 0.41 | 0.80 |
| piRNA      | piR-33382-L2             | 2.24  | 0.03  | 0.42 | 0.80 |
| scRNA      | HY4-L59                  | 4.56  | -0.01 | 0.42 | 0.80 |
| scRNA      | HY3-L279                 | 5.21  | 0.01  | 0.42 | 0.80 |
| tRNA       | chr2.tRNA22-PseudoTTG    | 3.03  | -0.01 | 0.42 | 0.80 |
| snoRNA     | HBII-420                 | 4.25  | 0.02  | 0.42 | 0.80 |
| snoRNA     | HBI-61                   | 3.49  | 0.02  | 0.42 | 0.80 |
| mir-5p     | hsa-miR-191-5p           | 8.87  | -0.01 | 0.42 | 0.80 |
| tRNA       | chr6.tRNA122-PseudoTGC   | 2.61  | -0.02 | 0.42 | 0.80 |
| scRNA      | HY1-L26                  | 2.97  | 0.01  | 0.42 | 0.80 |
| scRNA      | HY1-L273                 | 1.90  | 0.01  | 0.42 | 0.80 |
| scRNA      | HY4-L103                 | 4.44  | -0.01 | 0.42 | 0.80 |
| rRNA       | 5S-L106                  | 12.29 | 0.01  | 0.42 | 0.80 |
| piRNA      | piR-33082-L2             | 1.79  | 0.02  | 0.42 | 0.80 |
| rRNA       | 5S-L602                  | 5.12  | 0.01  | 0.43 | 0.80 |
| mir-3p     | hsa-miR-4742-3p          | 1.43  | -0.02 | 0.43 | 0.80 |
| tRNA       | chr10.tRNA6-ValTAC       | 1.49  | 0.02  | 0.43 | 0.80 |
| tRF5       | chr17.tRNA31-AsnGTT-tRF5 | 2.92  | 0.02  | 0.43 | 0.81 |
| scRNA      | BC200-L62                | 2.72  | 0.01  | 0.43 | 0.81 |
| scRNA      | HY4-L6                   | 3.98  | -0.01 | 0.43 | 0.81 |
| scRNA      | HY1-L226                 | 3.29  | 0.01  | 0.43 | 0.81 |
| mir-3p     | hsa-miR-132-3p           | 1.92  | 0.02  | 0.43 | 0.81 |
| rRNA       | LSU-rRNA_Hsa-L29         | 2.54  | 0.01  | 0.43 | 0.81 |
| mir-5p     | hsa-miR-106a-5p          | 2.83  | 0.01  | 0.43 | 0.81 |
| snRNA      | U4-L40                   | 2.99  | 0.01  | 0.44 | 0.81 |
| rRNA       | LSU-rRNA_Hsa-L365        | 1.60  | 0.02  | 0.44 | 0.81 |
| scRNA      | HY4-L111                 | 9.50  | -0.01 | 0.44 | 0.81 |
| rRNA       | 5S-L762                  | 4.86  | 0.01  | 0.44 | 0.81 |
| piRNA      | piR-36741-L2             | 1.62  | 0.02  | 0.44 | 0.81 |
| scRNA      | HY4-L122                 | 7.82  | -0.01 | 0.44 | 0.81 |
| rRNA       | LSU-rRNA_Hsa-L298        | 3.46  | 0.02  | 0.44 | 0.81 |
| scRNA      | HY3-L45                  | 3.48  | -0.01 | 0.44 | 0.81 |
| scRNA      | HY4-L77                  | 2.15  | 0.01  | 0.44 | 0.81 |
| scRNA      | BC200-L9                 | 2.83  | 0.01  | 0.44 | 0.81 |
| tRNA       | chr6.tRNA130-GlnTTG      | 3.35  | 0.01  | 0.44 | 0.81 |
| mir-5p3pno | hsa-miR-433              | 3.46  | -0.01 | 0.44 | 0.81 |
| tRF5       | chr9.tRNA6-AspGTC-tRF5   | 2.90  | 0.01  | 0.44 | 0.81 |
| rRNA       | 5S-L303                  | 2.33  | 0.02  | 0.44 | 0.81 |
| scRNA      | HY3-L177                 | 1.55  | 0.02  | 0.44 | 0.81 |
| mir-3p     | hsa-miR-339-3p           | 2.88  | 0.01  | 0.44 | 0.81 |

|            |                          |       |       |      |      |
|------------|--------------------------|-------|-------|------|------|
| rRNA       | 5S-L102                  | 7.36  | 0.01  | 0.45 | 0.81 |
| tRF3       | chr6.tRNA153-IleAAT-tRF3 | 2.68  | 0.02  | 0.45 | 0.81 |
| mir-3p     | hsa-miR-369-3p           | 1.38  | 0.02  | 0.45 | 0.81 |
| rRNA       | 5S-L621                  | 1.23  | 0.02  | 0.45 | 0.81 |
| mir-3p     | hsa-miR-223-3p           | 7.30  | -0.01 | 0.45 | 0.81 |
| scRNA      | HY1-L192                 | 5.99  | 0.01  | 0.45 | 0.81 |
| mir-5p     | hsa-miR-30b-5p           | 2.47  | -0.01 | 0.45 | 0.81 |
| snoRNA     | HBII-180C                | 4.12  | 0.01  | 0.45 | 0.82 |
| snoRNA     | U38A                     | 4.23  | 0.02  | 0.45 | 0.82 |
| scRNA      | HY4-L54                  | 6.72  | -0.01 | 0.45 | 0.82 |
| tRF3       | chr16.tRNA11-ProAGG-tRF3 | 1.79  | -0.02 | 0.45 | 0.82 |
| mir-5p     | hsa-miR-4665-5p          | 1.60  | -0.02 | 0.45 | 0.82 |
| snoRNA     | U13-L162                 | 2.03  | 0.01  | 0.45 | 0.82 |
| scRNA      | HY3-L432                 | 1.48  | -0.01 | 0.45 | 0.82 |
| scRNA      | BC200-L120               | 1.92  | 0.02  | 0.46 | 0.82 |
| mir-5p     | hsa-miR-660-5p           | 3.50  | 0.01  | 0.46 | 0.82 |
| piRNA      | piR-33151-L4             | 4.06  | 0.01  | 0.46 | 0.82 |
| tRF5       | chr1.tRNA118-HisGTG-tRF5 | 1.83  | 0.02  | 0.46 | 0.82 |
| scRNA      | HY1-L239                 | 4.37  | 0.01  | 0.46 | 0.82 |
| scRNA      | BC200-L73                | 2.27  | 0.01  | 0.46 | 0.82 |
| piRNA      | piR-51119                | 2.10  | -0.02 | 0.46 | 0.82 |
| mir-5p3pno | hsa-miR-103b-L2          | 3.90  | -0.01 | 0.46 | 0.82 |
| scRNA      | HY4-L68                  | 4.03  | 0.01  | 0.46 | 0.82 |
| rRNA       | LSU-rRNA_Hsa-L333        | 4.08  | 0.01  | 0.46 | 0.82 |
| scRNA      | BC200-L166               | 2.95  | 0.01  | 0.46 | 0.82 |
| snoRNA     | U100                     | 1.54  | -0.02 | 0.46 | 0.82 |
| piRNA      | piR-35548-L2             | 7.18  | -0.01 | 0.46 | 0.82 |
| tRF3       | chr16.tRNA31-PseudoTGG-t | 1.95  | 0.01  | 0.46 | 0.82 |
| scRNA      | BC200-L19                | 1.37  | 0.02  | 0.46 | 0.82 |
| scRNA      | BC200-L16                | 1.59  | 0.02  | 0.47 | 0.82 |
| mir-5p     | hsa-miR-15a-5p           | 3.78  | 0.01  | 0.47 | 0.82 |
| mir-3p     | hsa-miR-27a-3p           | 10.82 | -0.01 | 0.47 | 0.82 |
| mir-3p     | hsa-miR-19b-3p           | 4.04  | -0.01 | 0.47 | 0.83 |
| mir-3p     | hsa-miR-146b-3p          | 2.42  | -0.01 | 0.47 | 0.83 |
| snRNA      | U1-L63                   | 2.53  | 0.01  | 0.47 | 0.83 |
| mir-5p     | hsa-miR-339-5p           | 1.85  | -0.02 | 0.47 | 0.83 |
| tRF5       | chr1.tRNA132-PseudoCAC-t | 2.10  | -0.02 | 0.47 | 0.83 |
| mir-3p     | hsa-miR-200a-3p          | 2.22  | -0.02 | 0.47 | 0.83 |
| mir-5p     | hsa-miR-3158-5p-L2       | 1.49  | 0.02  | 0.48 | 0.83 |
| mir-3p     | hsa-miR-181c-3p          | 1.57  | -0.02 | 0.48 | 0.83 |
| scRNA      | HY1-L324                 | 1.92  | -0.01 | 0.48 | 0.83 |
| mir-5p     | hsa-miR-146b-5p          | 7.71  | -0.01 | 0.48 | 0.83 |
| scRNA      | HY4-L102                 | 8.16  | -0.01 | 0.48 | 0.83 |

|            |                         |       |       |      |      |
|------------|-------------------------|-------|-------|------|------|
| scRNA      | BC200-L149              | 1.76  | 0.02  | 0.48 | 0.83 |
| piRNA      | piR-35548-L4            | 7.22  | -0.01 | 0.48 | 0.84 |
| scRNA      | BC200-L117              | 1.83  | 0.02  | 0.49 | 0.84 |
| scRNA      | HY4-L16                 | 3.92  | 0.01  | 0.49 | 0.84 |
| mir-5p     | hsa-miR-3679-5p         | 2.94  | -0.01 | 0.49 | 0.84 |
| scRNA      | HY4-L28                 | 6.48  | -0.01 | 0.49 | 0.85 |
| piRNA      | piR-35982               | 15.63 | -0.01 | 0.49 | 0.85 |
| rRNA       | 5S-L946                 | 9.07  | 0.01  | 0.49 | 0.85 |
| mir-5p     | hsa-miR-17-5p           | 5.08  | -0.01 | 0.49 | 0.85 |
| mir-5p3pno | hsa-miR-378f            | 1.69  | 0.01  | 0.49 | 0.85 |
| rRNA       | 5S-L253                 | 3.20  | 0.01  | 0.49 | 0.85 |
| mir-5p     | hsa-miR-26a-5p-L2       | 10.75 | -0.01 | 0.49 | 0.85 |
| mir-5p     | hsa-miR-369-5p          | 1.73  | -0.02 | 0.49 | 0.85 |
| scRNA      | HY4-L159                | 4.46  | 0.01  | 0.50 | 0.85 |
| mir-5p     | hsa-miR-3613-5p         | 4.64  | -0.01 | 0.50 | 0.85 |
| rRNA       | 5S-L105                 | 5.89  | 0.01  | 0.50 | 0.85 |
| scRNA      | HY1-L326                | 1.43  | 0.02  | 0.50 | 0.85 |
| tRNA       | chr1.tRNA110-PseudoTTC  | 1.44  | 0.01  | 0.50 | 0.85 |
| mir-5p     | hsa-miR-122-5p          | 9.88  | -0.01 | 0.50 | 0.85 |
| rRNA       | 5S-L1070                | 1.47  | 0.02  | 0.50 | 0.85 |
| snoRNA     | U55                     | 5.84  | 0.01  | 0.50 | 0.85 |
| scRNA      | BC200-L11               | 1.53  | -0.02 | 0.50 | 0.85 |
| tRNA       | chr14.tRNA7-ArgACG      | 1.75  | -0.01 | 0.51 | 0.85 |
| rRNA       | 5S-L136                 | 1.53  | -0.01 | 0.51 | 0.85 |
| mir-5p     | hsa-miR-589-5p          | 4.55  | -0.01 | 0.51 | 0.85 |
| scRNA      | HY1-L280                | 2.44  | 0.01  | 0.51 | 0.86 |
| snoRNA     | mgh18S-121              | 1.93  | 0.02  | 0.51 | 0.86 |
| mir-5p     | hsa-miR-16-5p-L2        | 8.44  | -0.01 | 0.51 | 0.86 |
| mir-5p3pno | hsa-miR-651             | 3.29  | -0.01 | 0.51 | 0.86 |
| mir-5p3pno | hsa-miR-4472-L2         | 1.83  | 0.02  | 0.51 | 0.86 |
| rRNA       | 5S-L191                 | 4.70  | -0.01 | 0.51 | 0.86 |
| mir-5p3pno | hsa-miR-107             | 1.72  | -0.01 | 0.51 | 0.86 |
| tRF3       | chr9.tRNA6-AspGTC-tRF3  | 1.45  | -0.01 | 0.51 | 0.86 |
| mir-3p     | hsa-miR-330-3p          | 3.77  | -0.01 | 0.52 | 0.86 |
| piRNA      | piR-60576-L6            | 8.04  | 0.01  | 0.52 | 0.86 |
| mir-5p     | hsa-miR-503-5p          | 3.20  | -0.01 | 0.52 | 0.86 |
| mir-5p     | hsa-miR-199b-5p         | 2.97  | 0.01  | 0.52 | 0.86 |
| tRNA       | chr16.tRNA25-GlyGCC     | 4.78  | -0.01 | 0.52 | 0.86 |
| scRNA      | HY4-L92                 | 1.42  | 0.01  | 0.52 | 0.87 |
| rRNA       | 5S-L297                 | 1.59  | -0.01 | 0.52 | 0.87 |
| tRNA       | chr14.tRNA10-IleAAT     | 1.41  | 0.01  | 0.52 | 0.87 |
| tRF5       | chr5.tRNA22-AspGTC-tRF5 | 2.30  | 0.01  | 0.52 | 0.87 |
| rRNA       | LSU-rRNA_Hsa-L202       | 3.79  | 0.01  | 0.52 | 0.87 |

|            |                          |       |       |      |      |
|------------|--------------------------|-------|-------|------|------|
| mir-3p     | hsa-miR-342-3p           | 3.63  | -0.01 | 0.53 | 0.87 |
| tRNA       | chr2.tRNA2-TyrGTA        | 1.69  | 0.01  | 0.53 | 0.87 |
| tRNA       | chr6.tRNA123-SerGCT      | 2.23  | -0.01 | 0.53 | 0.87 |
| mir-5p     | hsa-miR-223-5p           | 8.71  | -0.01 | 0.53 | 0.87 |
| scRNA      | HY4-L32                  | 3.65  | -0.01 | 0.53 | 0.87 |
| piRNA      | piR-33404                | 6.30  | 0.01  | 0.53 | 0.87 |
| scRNA      | HY1-L430                 | 1.34  | 0.01  | 0.53 | 0.87 |
| mir-5p3pno | hsa-miR-4485             | 4.29  | 0.01  | 0.53 | 0.87 |
| mir-5p     | hsa-miR-5010-5p          | 1.44  | 0.01  | 0.53 | 0.87 |
| scRNA      | HY3-L105                 | 3.97  | 0.01  | 0.53 | 0.87 |
| scRNA      | HY4-L14                  | 8.84  | 0.00  | 0.53 | 0.87 |
| piRNA      | piR-38502                | 3.33  | 0.01  | 0.53 | 0.87 |
| scRNA      | HY1-L13                  | 2.51  | 0.01  | 0.53 | 0.87 |
| rRNA       | 5S-L71                   | 1.74  | 0.01  | 0.54 | 0.87 |
| tRF3       | chr18.tRNA2-PseudoTCC-tR | 3.09  | 0.01  | 0.54 | 0.87 |
| rRNA       | LSU-rRNA_Hsa-L388        | 10.79 | 0.00  | 0.54 | 0.87 |
| snRNA      | U1-L11                   | 3.91  | -0.01 | 0.54 | 0.87 |
| mir-3p     | hsa-let-7i-3p            | 1.50  | -0.01 | 0.54 | 0.87 |
| scRNA      | HY4-L52                  | 2.37  | -0.01 | 0.54 | 0.87 |
| tRNA       | chr17.tRNA15-CysGCA      | 6.11  | -0.01 | 0.54 | 0.87 |
| rRNA       | LSU-rRNA_Hsa-L151        | 3.13  | 0.01  | 0.54 | 0.87 |
| piRNA      | piR-36323-L3             | 2.88  | -0.01 | 0.54 | 0.87 |
| scRNA      | HY4-L160                 | 7.28  | 0.00  | 0.54 | 0.87 |
| scRNA      | HY1-L276                 | 3.15  | 0.01  | 0.54 | 0.87 |
| mir-5p3pno | hsa-miR-203a             | 2.28  | 0.02  | 0.54 | 0.87 |
| piRNA      | piR-36444                | 2.53  | -0.01 | 0.54 | 0.87 |
| scRNA      | HY3-L62                  | 1.84  | 0.02  | 0.54 | 0.87 |
| tRNA       | chr17.tRNA41-SerCGA      | 2.38  | -0.02 | 0.54 | 0.87 |
| scRNA      | HY4-L69                  | 9.89  | 0.00  | 0.54 | 0.87 |
| scRNA      | HY4-L71                  | 5.97  | -0.01 | 0.54 | 0.87 |
| scRNA      | BC200-L100               | 1.69  | 0.02  | 0.54 | 0.87 |
| scRNA      | HY3-L208                 | 1.34  | 0.01  | 0.54 | 0.87 |
| mir-5p     | hsa-let-7b-5p            | 12.45 | 0.00  | 0.55 | 0.87 |
| rRNA       | 5S-L103                  | 3.03  | 0.01  | 0.55 | 0.87 |
| mir-3p     | hsa-miR-499b-3p          | 3.25  | 0.01  | 0.55 | 0.87 |
| mir-5p3pno | hsa-miR-889              | 2.82  | -0.01 | 0.55 | 0.87 |
| snoRNA     | U90                      | 2.75  | 0.02  | 0.55 | 0.87 |
| snoRNA     | mgh28S-2409              | 3.15  | 0.01  | 0.55 | 0.87 |
| tRNA       | chr17.tRNA10-GlyTCC      | 1.81  | 0.01  | 0.55 | 0.87 |
| piRNA      | piR-33082                | 7.18  | -0.01 | 0.55 | 0.87 |
| tRNA       | chr6.tRNA36-ArgACG       | 1.39  | -0.01 | 0.55 | 0.87 |
| snoRNA     | HBII-166                 | 3.05  | -0.01 | 0.55 | 0.87 |
| scRNA      | HY4-L72                  | 7.28  | 0.00  | 0.55 | 0.87 |



|            |                          |      |       |      |      |
|------------|--------------------------|------|-------|------|------|
| scRNA      | HY4-L153                 | 8.62 | 0.00  | 0.56 | 0.87 |
| rRNA       | LSU-rRNA_Hsa-L188        | 1.83 | 0.01  | 0.56 | 0.87 |
| rRNA       | 5S-L983                  | 1.77 | 0.01  | 0.56 | 0.87 |
| snoRNA     | U57                      | 4.69 | -0.01 | 0.56 | 0.87 |
| scRNA      | HY4-L98                  | 9.97 | 0.00  | 0.56 | 0.87 |
| piRNA      | piR-30112                | 2.68 | 0.01  | 0.56 | 0.87 |
| rRNA       | 5S-L397                  | 1.55 | 0.01  | 0.56 | 0.87 |
| mir-5p3pno | hsa-miR-548j             | 1.80 | 0.01  | 0.56 | 0.87 |
| piRNA      | piR-52041                | 1.91 | 0.01  | 0.56 | 0.87 |
| snoRNA     | U95                      | 6.95 | 0.01  | 0.56 | 0.87 |
| snoRNA     | U23                      | 1.46 | 0.01  | 0.56 | 0.87 |
| mir-3p     | hsa-miR-576-3p           | 4.04 | -0.01 | 0.56 | 0.87 |
| snoRNA     | ACA21                    | 2.76 | 0.01  | 0.56 | 0.87 |
| rRNA       | LSU-rRNA_Hsa-L236        | 1.43 | 0.02  | 0.56 | 0.87 |
| mir-5p     | hsa-miR-424-5p           | 2.86 | -0.01 | 0.56 | 0.87 |
| rRNA       | 5S-L99                   | 8.58 | 0.01  | 0.56 | 0.87 |
| tRF3       | chr7.tRNA26-PseudoTTG-tR | 2.25 | 0.01  | 0.57 | 0.88 |
| scRNA      | HY4-L81                  | 3.17 | -0.01 | 0.57 | 0.88 |
| rRNA       | LSU-rRNA_Hsa-L367        | 7.90 | 0.00  | 0.57 | 0.88 |
| tRF5       | chr1.tRNA125-PseudoGTT-t | 1.49 | -0.01 | 0.57 | 0.88 |
| scRNA      | HY3-L142                 | 1.70 | 0.02  | 0.57 | 0.88 |
| piRNA      | piR-53659                | 2.18 | 0.00  | 0.57 | 0.88 |
| tRNA       | chr6.tRNA63-IleTAT       | 1.53 | 0.01  | 0.57 | 0.88 |
| tRNA       | chr2.tRNA6-GluTTC        | 4.09 | 0.01  | 0.57 | 0.88 |
| mir-5p     | hsa-miR-1304-5p          | 1.47 | -0.01 | 0.57 | 0.88 |
| scRNA      | HY3-L159                 | 3.19 | 0.01  | 0.57 | 0.88 |
| rRNA       | 5S-L1179                 | 1.46 | 0.01  | 0.58 | 0.88 |
| rRNA       | 5S-L815                  | 2.57 | 0.01  | 0.58 | 0.88 |
| scRNA      | HY4-L154                 | 1.53 | -0.01 | 0.58 | 0.88 |
| snoRNA     | U82                      | 5.05 | 0.01  | 0.58 | 0.88 |
| mir-3p     | hsa-miR-130a-3p          | 3.58 | -0.01 | 0.58 | 0.88 |
| rRNA       | LSU-rRNA_Hsa-L150        | 3.40 | 0.01  | 0.58 | 0.88 |
| tRNA       | chr17.tRNA36-ThrAGT      | 2.02 | 0.01  | 0.58 | 0.88 |
| piRNA      | piR-31638                | 1.74 | 0.01  | 0.58 | 0.88 |
| mir-5p     | hsa-miR-142-5p           | 5.73 | -0.01 | 0.58 | 0.88 |
| mir-5p3pno | hsa-miR-4447             | 1.30 | 0.02  | 0.58 | 0.88 |
| rRNA       | LSU-rRNA_Hsa-L378        | 2.46 | 0.01  | 0.58 | 0.88 |
| scRNA      | HY4-L87                  | 9.96 | 0.00  | 0.58 | 0.88 |
| scRNA      | HY3-L120                 | 2.34 | -0.01 | 0.58 | 0.88 |
| tRF3       | chr3.tRNA10-PseudoCTC-tR | 1.55 | 0.02  | 0.58 | 0.88 |
| mir-3p     | hsa-let-7b-3p            | 3.86 | 0.01  | 0.58 | 0.88 |
| scRNA      | HY3-L84                  | 6.39 | -0.01 | 0.59 | 0.88 |
| rRNA       | 5S-L1164                 | 2.08 | 0.01  | 0.59 | 0.89 |

|            |                          |      |       |      |      |
|------------|--------------------------|------|-------|------|------|
| scRNA      | HY4-L97                  | 8.74 | 0.00  | 0.59 | 0.89 |
| mir-3p     | hsa-miR-23b-3p           | 3.56 | -0.01 | 0.59 | 0.89 |
| tRNA       | chr6.tRNA153-IleAAT      | 1.68 | 0.02  | 0.59 | 0.89 |
| mir-3p     | hsa-miR-4433-3p          | 2.78 | -0.01 | 0.59 | 0.89 |
| snoRNA     | E2                       | 2.14 | -0.01 | 0.59 | 0.89 |
| scRNA      | HY4-L43                  | 2.22 | -0.01 | 0.59 | 0.89 |
| tRNA       | chr6.tRNA147-SerAGA      | 8.22 | 0.01  | 0.60 | 0.89 |
| snoRNA     | ACA51                    | 2.14 | 0.01  | 0.60 | 0.89 |
| mir-3p     | hsa-miR-144-3p           | 5.77 | 0.01  | 0.60 | 0.89 |
| rRNA       | 5S-L1091                 | 1.37 | -0.01 | 0.60 | 0.89 |
| tRNA       | chr1.tRNA119-LysCTT      | 7.12 | 0.01  | 0.60 | 0.90 |
| tRF5       | chr1.tRNA98-ValCAC-trF5  | 2.65 | -0.01 | 0.60 | 0.90 |
| mir-3p     | hsa-miR-363-3p           | 7.85 | -0.01 | 0.60 | 0.90 |
| tRF3       | chr20.tRNA4-PseudoTAA-tR | 4.75 | 0.01  | 0.60 | 0.90 |
| snoRNA     | U105B                    | 4.75 | 0.01  | 0.60 | 0.90 |
| snoRNA     | HBII-82                  | 2.14 | 0.02  | 0.60 | 0.90 |
| snRNA      | U1-L142                  | 4.24 | 0.01  | 0.60 | 0.90 |
| tRNA       | chr1.tRNA18-PseudoCCT    | 1.66 | -0.01 | 0.61 | 0.90 |
| tRNA       | chr17.tRNA31-AsnGTT      | 2.61 | 0.01  | 0.61 | 0.90 |
| snoRNA     | U49A                     | 7.52 | 0.01  | 0.61 | 0.90 |
| piRNA      | piR-38354                | 2.15 | 0.01  | 0.61 | 0.90 |
| scRNA      | BC200-L134               | 1.43 | 0.01  | 0.61 | 0.90 |
| tRNA       | chr6.tRNA82-GlyGCC       | 5.27 | -0.01 | 0.61 | 0.90 |
| scRNA      | HY4-L138                 | 8.42 | 0.00  | 0.61 | 0.90 |
| mir-5p     | hsa-miR-148b-5p          | 2.87 | -0.01 | 0.61 | 0.90 |
| mir-5p3pno | hsa-miR-1180             | 4.05 | -0.01 | 0.61 | 0.90 |
| scRNA      | HY1-L302                 | 2.49 | -0.01 | 0.61 | 0.90 |
| mir-5p3pno | hsa-miR-3168             | 2.09 | 0.01  | 0.61 | 0.90 |
| mir-5p     | hsa-miR-30e-5p           | 8.13 | 0.00  | 0.61 | 0.90 |
| rRNA       | 5S-L1144                 | 1.38 | 0.01  | 0.61 | 0.90 |
| scRNA      | HY4-L107                 | 9.96 | 0.00  | 0.61 | 0.90 |
| snoRNA     | ACA34                    | 4.14 | 0.01  | 0.61 | 0.90 |
| mir-5p3pno | hsa-miR-1287             | 1.87 | 0.01  | 0.61 | 0.90 |
| rRNA       | LSU-rRNA_Hsa-L346        | 1.67 | 0.01  | 0.61 | 0.90 |
| scRNA      | BC200-L116               | 2.42 | -0.01 | 0.62 | 0.90 |
| tRNA       | chr16.tRNA13-PseudoCCT   | 4.70 | -0.01 | 0.62 | 0.90 |
| piRNA      | piR-41209                | 2.58 | 0.01  | 0.62 | 0.90 |
| mir-5p     | hsa-miR-185-5p           | 8.24 | -0.01 | 0.62 | 0.90 |
| mir-5p     | hsa-miR-181b-5p-L2       | 6.05 | 0.00  | 0.62 | 0.90 |
| rRNA       | 5S-L247                  | 1.54 | 0.01  | 0.62 | 0.90 |
| mir-5p3pno | hsa-miR-451b             | 2.85 | -0.01 | 0.62 | 0.90 |
| piRNA      | piR-35284                | 8.07 | -0.01 | 0.62 | 0.90 |
| tRNA       | chr1.tRNA64-GluTTC       | 7.89 | 0.00  | 0.62 | 0.90 |

|            |                     |       |       |      |      |
|------------|---------------------|-------|-------|------|------|
| tRNA       | chr14.tRNA19-TyrGTA | 2.52  | 0.01  | 0.62 | 0.90 |
| scRNA      | HY4-L39             | 3.89  | -0.01 | 0.62 | 0.90 |
| mir-5p     | hsa-miR-342-5p      | 6.55  | -0.01 | 0.63 | 0.90 |
| mir-5p3pno | hsa-miR-320b        | 4.99  | 0.00  | 0.63 | 0.90 |
| mir-5p3pno | hsa-miR-133a        | 1.55  | -0.02 | 0.63 | 0.90 |
| tRNA       | chr14.tRNA3-ProTGG  | 3.97  | 0.01  | 0.63 | 0.90 |
| snRNA      | U1-L71              | 5.05  | 0.01  | 0.63 | 0.90 |
| mir-3p     | hsa-miR-3591-3p     | 12.23 | -0.01 | 0.63 | 0.90 |
| mir-3p     | hsa-let-7f-1-3p     | 1.62  | -0.01 | 0.63 | 0.90 |
| rRNA       | LSU-rRNA_Hsa-L139   | 14.15 | 0.00  | 0.63 | 0.90 |
| mir-3p     | hsa-miR-195-3p      | 1.91  | 0.01  | 0.63 | 0.90 |
| rRNA       | 5S-L115             | 1.96  | 0.01  | 0.63 | 0.90 |
| mir-5p3pno | hsa-miR-210         | 2.15  | -0.01 | 0.64 | 0.90 |
| scRNA      | HY3-L199            | 1.72  | 0.01  | 0.64 | 0.90 |
| scRNA      | HY1-L28             | 1.58  | 0.01  | 0.64 | 0.90 |
| rRNA       | 5S-L1068            | 2.39  | -0.01 | 0.64 | 0.90 |
| rRNA       | LSU-rRNA_Hsa-L305   | 5.25  | 0.01  | 0.64 | 0.90 |
| scRNA      | HY4                 | 10.16 | 0.00  | 0.64 | 0.90 |
| piRNA      | piR-48772-L2        | 1.95  | -0.01 | 0.64 | 0.90 |
| scRNA      | BC200-L126          | 3.33  | 0.01  | 0.64 | 0.90 |
| snoRNA     | U15B                | 2.19  | -0.01 | 0.64 | 0.90 |
| rRNA       | LSU-rRNA_Hsa-L163   | 9.10  | 0.01  | 0.64 | 0.90 |
| mir-3p     | hsa-miR-708-3p      | 1.52  | -0.01 | 0.64 | 0.90 |
| scRNA      | HY1-L212            | 2.69  | 0.01  | 0.64 | 0.90 |
| snoRNA     | ACA3-2              | 2.59  | 0.01  | 0.64 | 0.90 |
| tRNA       | chr1.tRNA52-ProCGG  | 2.13  | 0.01  | 0.64 | 0.90 |
| tRNA       | chr1.tRNA15-GlnCTG  | 2.98  | 0.01  | 0.64 | 0.90 |
| mir-3p     | hsa-miR-374c-3p     | 2.90  | -0.01 | 0.64 | 0.90 |
| scRNA      | HY4-L135            | 18.67 | 0.00  | 0.64 | 0.90 |
| snoRNA     | U92                 | 2.16  | -0.01 | 0.64 | 0.90 |
| snoRNA     | mgU6-47             | 1.72  | 0.01  | 0.64 | 0.90 |
| tRNA       | chr1.tRNA134-GluTTC | 7.45  | 0.00  | 0.65 | 0.90 |
| rRNA       | 5S-L189             | 2.24  | -0.01 | 0.65 | 0.90 |
| mir-5p     | hsa-miR-30c-5p      | 6.46  | 0.00  | 0.65 | 0.90 |
| rRNA       | 5S-L558             | 7.28  | 0.00  | 0.65 | 0.91 |
| scRNA      | HY1-L167            | 2.48  | -0.01 | 0.65 | 0.91 |
| tRNA       | chr1.tRNA2-GlyCCC   | 5.38  | -0.01 | 0.65 | 0.91 |
| mir-5p     | hsa-miR-186-5p      | 6.23  | -0.01 | 0.65 | 0.91 |
| piRNA      | piR-35952-L4        | 3.22  | 0.01  | 0.65 | 0.91 |
| snoRNA     | ACA47               | 3.23  | 0.01  | 0.65 | 0.91 |
| snoRNA     | HBII-13             | 3.91  | 0.01  | 0.65 | 0.91 |
| snRNA      | U6-L440             | 1.97  | -0.01 | 0.66 | 0.91 |
| rRNA       | LSU-rRNA_Hsa-L189   | 4.24  | 0.01  | 0.66 | 0.91 |

|            |                          |       |       |      |      |
|------------|--------------------------|-------|-------|------|------|
| scRNA      | HY4-L10                  | 10.20 | 0.00  | 0.66 | 0.91 |
| tRNA       | chr1.tRNA60-PseudoTAA    | 3.73  | 0.01  | 0.66 | 0.91 |
| snoRNA     | HBII-295                 | 3.05  | -0.01 | 0.66 | 0.91 |
| scRNA      | HY4-L151                 | 2.39  | 0.01  | 0.66 | 0.91 |
| mir-5p3pno | hsa-miR-3928             | 1.51  | 0.01  | 0.66 | 0.91 |
| rRNA       | 5S-L61                   | 2.67  | 0.01  | 0.66 | 0.91 |
| tRNA       | chr6.tRNA168-TrpCCA      | 2.05  | 0.01  | 0.66 | 0.91 |
| scRNA      | HY4-L15                  | 7.92  | 0.00  | 0.66 | 0.91 |
| snoRNA     | U62B                     | 3.72  | -0.01 | 0.66 | 0.91 |
| tRNA       | chr6.tRNA143-LysTTT      | 5.55  | 0.01  | 0.66 | 0.91 |
| snRNA      | U6-L1308                 | 2.67  | 0.01  | 0.67 | 0.91 |
| snoRNA     | U59A                     | 6.70  | -0.01 | 0.67 | 0.91 |
| mir-3p     | hsa-miR-30a-3p           | 5.31  | 0.00  | 0.67 | 0.91 |
| tRNA       | chr19.tRNA13-ValCAC      | 4.33  | 0.01  | 0.67 | 0.91 |
| scRNA      | HY1-L143                 | 2.32  | 0.01  | 0.67 | 0.91 |
| mir-5p     | hsa-miR-23b-5p           | 1.51  | -0.01 | 0.67 | 0.92 |
| scRNA      | HY4-L49                  | 1.27  | 0.01  | 0.67 | 0.92 |
| rRNA       | LSU-rRNA_Hsa-L130        | 4.63  | 0.01  | 0.67 | 0.92 |
| piRNA      | piR-36074                | 4.27  | 0.01  | 0.67 | 0.92 |
| tRNA       | chr6.tRNA73-ArgCCG       | 2.37  | 0.01  | 0.67 | 0.92 |
| mir-3p     | hsa-miR-574-3p           | 1.66  | 0.01  | 0.67 | 0.92 |
| tRF5       | chr4.tRNA3-CysGCA-tRF5   | 1.61  | -0.01 | 0.67 | 0.92 |
| tRNA       | chr16.tRNA34-GlyCCC      | 4.00  | 0.01  | 0.68 | 0.92 |
| tRF3       | chr12.tRNA7-AspGTC-tRF3  | 1.65  | 0.01  | 0.68 | 0.92 |
| piRNA      | piR-62011                | 8.25  | 0.00  | 0.68 | 0.92 |
| snRNA      | U6-L503                  | 1.31  | 0.01  | 0.68 | 0.92 |
| tRNA       | chr12.tRNA2-SerCGA       | 1.52  | 0.02  | 0.68 | 0.92 |
| tRF5       | chr6.tRNA114-ArgCCG-tRF5 | 1.61  | 0.01  | 0.68 | 0.92 |
| mir-5p     | hsa-miR-6723-5p          | 4.58  | 0.01  | 0.68 | 0.92 |
| scRNA      | HY4-L139                 | 10.83 | 0.00  | 0.68 | 0.92 |
| rRNA       | LSU-rRNA_Hsa-L211        | 1.63  | 0.01  | 0.68 | 0.92 |
| scRNA      | BC200-L146               | 2.61  | -0.01 | 0.68 | 0.92 |
| tRNA       | chr12.tRNA6-TrpCCA       | 2.86  | -0.01 | 0.68 | 0.92 |
| mir-5p     | hsa-miR-574-5p           | 4.85  | 0.00  | 0.69 | 0.92 |
| mir-5p     | hsa-miR-4787-5p          | 1.33  | -0.01 | 0.69 | 0.92 |
| tRNA       | chr14.tRNA23-ProAGG      | 2.14  | 0.01  | 0.69 | 0.92 |
| piRNA      | piR-43772-L2             | 6.19  | 0.00  | 0.69 | 0.92 |
| mir-3p     | hsa-miR-629-3p           | 1.42  | 0.01  | 0.69 | 0.92 |
| rRNA       | LSU-rRNA_Hsa-L4          | 8.09  | 0.00  | 0.69 | 0.92 |
| tRNA       | chr16.tRNA4-ProAGG       | 2.50  | -0.01 | 0.69 | 0.92 |
| mir-5p3pno | hsa-miR-4473             | 1.39  | -0.01 | 0.69 | 0.92 |
| snRNA      | U4-L24                   | 1.61  | -0.01 | 0.69 | 0.92 |
| snoRNA     | U81                      | 6.27  | 0.01  | 0.69 | 0.92 |

|            |                       |       |       |      |      |
|------------|-----------------------|-------|-------|------|------|
| tRNA       | chr2.tRNA1-PseudoCCC  | 5.86  | 0.00  | 0.69 | 0.92 |
| rRNA       | 5S-L986               | 1.69  | -0.01 | 0.69 | 0.92 |
| tRNA       | chr6.tRNA87-GluCTC    | 15.82 | 0.00  | 0.69 | 0.92 |
| mir-5p     | hsa-miR-331-5p        | 1.28  | -0.01 | 0.69 | 0.92 |
| scRNA      | HY1-L45               | 1.90  | 0.01  | 0.69 | 0.92 |
| mir-5p3pno | hsa-miR-618           | 2.72  | 0.01  | 0.70 | 0.92 |
| snRNA      | U2-L479               | 1.54  | 0.01  | 0.70 | 0.92 |
| snoRNA     | mgU6-77               | 4.50  | 0.01  | 0.70 | 0.92 |
| mir-5p3pno | hsa-miR-2110          | 5.17  | 0.00  | 0.70 | 0.92 |
| snoRNA     | SNORD127              | 4.77  | 0.01  | 0.70 | 0.92 |
| piRNA      | piR-31068-L3          | 3.12  | -0.01 | 0.70 | 0.92 |
| piRNA      | piR-53129             | 1.55  | 0.01  | 0.70 | 0.92 |
| tRNA       | chr1.tRNA117-GlyTCC   | 2.71  | 0.00  | 0.70 | 0.92 |
| snoRNA     | ACA54                 | 1.60  | 0.01  | 0.70 | 0.92 |
| tRNA       | chr6.tRNA86-PseudoTAC | 2.07  | 0.01  | 0.70 | 0.92 |
| mir-5p     | hsa-miR-155-5p        | 4.35  | 0.00  | 0.70 | 0.92 |
| tRNA       | chr20.tRNA3-PseudoCAC | 1.30  | -0.01 | 0.70 | 0.92 |
| tRNA       | chr22.tRNA1-SeCTCA    | 2.22  | -0.01 | 0.70 | 0.92 |
| snoRNA     | U31                   | 7.96  | 0.01  | 0.71 | 0.92 |
| mir-3p     | hsa-miR-125b-2-3p     | 1.53  | 0.01  | 0.71 | 0.92 |
| rRNA       | LSU-rRNA_Hsa-L102     | 3.17  | 0.01  | 0.71 | 0.92 |
| piRNA      | piR-33468-L4          | 2.34  | 0.00  | 0.71 | 0.92 |
| mir-3p     | hsa-miR-501-3p        | 4.83  | 0.00  | 0.71 | 0.92 |
| snoRNA     | HBII-429              | 4.20  | -0.01 | 0.71 | 0.92 |
| rRNA       | 5S-L1262              | 1.38  | -0.01 | 0.71 | 0.92 |
| scRNA      | HY1-L418              | 1.64  | 0.01  | 0.71 | 0.92 |
| scRNA      | HY4-L66               | 7.15  | 0.00  | 0.71 | 0.92 |
| snoRNA     | ACA18                 | 2.07  | 0.01  | 0.71 | 0.92 |
| scRNA      | HY4-L18               | 1.43  | -0.01 | 0.71 | 0.92 |
| rRNA       | 5S-L367               | 1.91  | -0.01 | 0.71 | 0.92 |
| scRNA      | HY4-L120              | 9.92  | 0.00  | 0.71 | 0.92 |
| mir-3p     | hsa-let-7a-3p-L2      | 3.03  | 0.01  | 0.71 | 0.92 |
| snRNA      | U2-L218               | 1.63  | 0.01  | 0.71 | 0.92 |
| scRNA      | HY1-L227              | 1.30  | 0.01  | 0.72 | 0.92 |
| mir-3p     | hsa-miR-126-3p        | 11.12 | 0.00  | 0.72 | 0.92 |
| mir-5p     | hsa-miR-125a-5p       | 4.98  | 0.01  | 0.72 | 0.92 |
| snoRNA     | U46                   | 4.48  | 0.01  | 0.72 | 0.92 |
| piRNA      | piR-39361             | 2.73  | 0.01  | 0.72 | 0.92 |
| mir-5p     | hsa-miR-7-5p-L3       | 1.44  | -0.01 | 0.72 | 0.92 |
| scRNA      | HY4-L136              | 2.51  | -0.01 | 0.72 | 0.92 |
| scRNA      | HY4-L17               | 10.67 | 0.00  | 0.72 | 0.92 |
| snoRNA     | ACA46                 | 2.21  | -0.01 | 0.72 | 0.92 |
| piRNA      | piR-32678-L3          | 10.98 | 0.00  | 0.72 | 0.92 |

|            |                         |       |       |      |      |
|------------|-------------------------|-------|-------|------|------|
| mir-3p     | hsa-miR-145-3p          | 4.84  | 0.00  | 0.72 | 0.92 |
| scRNA      | HY4-L132                | 2.50  | 0.01  | 0.72 | 0.92 |
| mir-5p3pno | hsa-miR-1468            | 2.31  | -0.01 | 0.72 | 0.92 |
| mir-5p     | hsa-miR-425-5p          | 5.12  | 0.00  | 0.73 | 0.92 |
| rRNA       | 5S-L95                  | 1.71  | 0.01  | 0.73 | 0.92 |
| scRNA      | HY1-L111                | 1.94  | 0.01  | 0.73 | 0.92 |
| rRNA       | SSU-rRNA_Hsa-L3         | 1.28  | -0.01 | 0.73 | 0.92 |
| mir-3p     | hsa-miR-505-3p          | 2.00  | -0.01 | 0.73 | 0.92 |
| tRNA       | chr6.tRNA128-GlyGCC     | 4.35  | 0.00  | 0.73 | 0.92 |
| piRNA      | piR-36494               | 2.00  | -0.01 | 0.73 | 0.92 |
| scRNA      | BC200-L138              | 4.89  | 0.00  | 0.73 | 0.92 |
| snoRNA     | U45C                    | 2.62  | 0.01  | 0.73 | 0.92 |
| tRNA       | chr12.tRNA4-AspGTC      | 4.64  | -0.01 | 0.73 | 0.92 |
| tRF5       | chr6.tRNA56-PheGAA-tRF5 | 1.38  | 0.01  | 0.73 | 0.93 |
| scRNA      | HY1-L171                | 1.68  | 0.01  | 0.73 | 0.93 |
| piRNA      | piR-30890               | 3.30  | 0.01  | 0.73 | 0.93 |
| mir-5p3pno | hsa-miR-320a            | 11.48 | 0.00  | 0.73 | 0.93 |
| snoRNA     | HBII-336                | 2.07  | -0.01 | 0.73 | 0.93 |
| rRNA       | 5S-L1143                | 1.64  | 0.01  | 0.73 | 0.93 |
| mir-3p     | hsa-miR-200c-3p         | 2.75  | 0.01  | 0.73 | 0.93 |
| mir-5p3pno | hsa-miR-1244-L2         | 1.66  | 0.01  | 0.73 | 0.93 |
| scRNA      | HY4-L99                 | 1.47  | 0.01  | 0.74 | 0.93 |
| scRNA      | BC200-L147              | 2.25  | 0.01  | 0.74 | 0.93 |
| mir-3p     | hsa-miR-99b-3p          | 3.53  | 0.01  | 0.74 | 0.93 |
| mir-5p     | hsa-miR-4746-5p         | 1.73  | 0.01  | 0.74 | 0.93 |
| tRNA       | chr16.tRNA29-ProAGG     | 2.96  | 0.00  | 0.74 | 0.93 |
| rRNA       | 5S-L282                 | 1.46  | 0.01  | 0.74 | 0.93 |
| mir-5p3pno | hsa-miR-3615            | 7.34  | 0.00  | 0.74 | 0.93 |
| mir-3p     | hsa-miR-10b-3p          | 1.70  | 0.01  | 0.74 | 0.93 |
| piRNA      | piR-33151-L12           | 2.94  | 0.00  | 0.74 | 0.93 |
| snoRNA     | U50                     | 5.82  | -0.01 | 0.74 | 0.93 |
| mir-3p     | hsa-miR-3605-3p         | 2.12  | -0.01 | 0.74 | 0.93 |
| snoRNA     | ACA3                    | 2.48  | -0.01 | 0.74 | 0.93 |
| tRF5       | chr8.tRNA12-TyrGTA-tRF5 | 2.21  | -0.01 | 0.74 | 0.93 |
| mir-5p3pno | hsa-miR-4326            | 1.51  | -0.01 | 0.74 | 0.93 |
| scRNA      | BC200-L36               | 2.68  | 0.01  | 0.74 | 0.93 |
| snoRNA     | U18B                    | 2.75  | 0.01  | 0.75 | 0.93 |
| piRNA      | piR-31038               | 9.22  | 0.00  | 0.75 | 0.93 |
| scRNA      | BC200-L101              | 1.85  | 0.01  | 0.75 | 0.93 |
| piRNA      | piR-32950               | 6.31  | 0.00  | 0.75 | 0.93 |
| mir-5p3pno | hsa-miR-6073            | 1.46  | -0.01 | 0.75 | 0.93 |
| snoRNA     | U83B                    | 2.68  | 0.01  | 0.75 | 0.93 |
| tRNA       | chr17.tRNA12-TrpCCA     | 2.18  | 0.01  | 0.75 | 0.93 |

|            |                          |       |       |      |      |
|------------|--------------------------|-------|-------|------|------|
| snoRNA     | SNORD119                 | 5.61  | 0.01  | 0.75 | 0.93 |
| tRNA       | chr16.tRNA33-PseudoAGG   | 3.64  | 0.01  | 0.75 | 0.93 |
| mir-5p     | hsa-miR-2115-5p          | 1.27  | -0.01 | 0.75 | 0.93 |
| mir-5p3pno | hsa-miR-548e             | 2.60  | -0.01 | 0.75 | 0.93 |
| mir-5p     | hsa-let-7a-5p-L3         | 12.09 | 0.00  | 0.75 | 0.93 |
| scRNA      | HY4-L46                  | 9.09  | 0.00  | 0.75 | 0.93 |
| scRNA      | HY1-L356                 | 4.04  | 0.00  | 0.76 | 0.93 |
| tRF5       | chr1.tRNA90-ValCAC-tRF5  | 2.14  | 0.01  | 0.76 | 0.93 |
| tRNA       | chr6.tRNA74-LeuCAA       | 2.43  | -0.01 | 0.76 | 0.93 |
| piRNA      | piR-35952-L5             | 2.44  | -0.01 | 0.76 | 0.93 |
| rRNA       | 5S-L550                  | 2.32  | 0.00  | 0.76 | 0.93 |
| piRNA      | piR-36170                | 2.57  | -0.01 | 0.76 | 0.93 |
| mir-3p     | hsa-miR-29b-3p           | 2.25  | 0.01  | 0.76 | 0.93 |
| rRNA       | 5S-L1071                 | 1.54  | 0.01  | 0.76 | 0.93 |
| tRNA       | chr16.tRNA31-PseudoTGG   | 3.01  | -0.01 | 0.76 | 0.93 |
| snoRNA     | ACA20                    | 2.31  | 0.01  | 0.76 | 0.93 |
| mir-3p     | hsa-miR-570-3p           | 1.85  | 0.00  | 0.76 | 0.93 |
| mir-3p     | hsa-miR-92b-3p           | 4.74  | 0.00  | 0.76 | 0.93 |
| scRNA      | HY4-L35                  | 7.15  | 0.00  | 0.76 | 0.93 |
| piRNA      | piR-36741                | 6.41  | 0.00  | 0.76 | 0.93 |
| snRNA      | U2-L550                  | 2.12  | -0.01 | 0.77 | 0.93 |
| snoRNA     | U45A                     | 4.15  | -0.01 | 0.77 | 0.93 |
| piRNA      | piR-61465                | 3.75  | 0.00  | 0.77 | 0.93 |
| rRNA       | 5S-L137                  | 1.95  | 0.01  | 0.77 | 0.93 |
| rRNA       | LSU-rRNA_Hsa-L43         | 1.53  | -0.01 | 0.77 | 0.93 |
| mir-3p     | hsa-miR-197-3p           | 2.69  | -0.01 | 0.77 | 0.93 |
| mir-5p3pno | hsa-miR-320d-L2          | 3.63  | 0.00  | 0.77 | 0.93 |
| snoRNA     | ACA36B                   | 3.84  | 0.00  | 0.77 | 0.93 |
| piRNA      | piR-35413-L2             | 1.56  | 0.00  | 0.77 | 0.93 |
| piRNA      | piR-44984-L3             | 2.62  | 0.00  | 0.77 | 0.93 |
| mir-3p     | hsa-miR-22-3p            | 10.18 | 0.00  | 0.77 | 0.93 |
| snoRNA     | U45B                     | 2.57  | 0.01  | 0.77 | 0.93 |
| rRNA       | LSU-rRNA_Hsa-L266        | 3.17  | 0.00  | 0.77 | 0.93 |
| tRNA       | chr8.tRNA5-TyrGTA        | 1.91  | -0.01 | 0.77 | 0.93 |
| tRF5       | chr6.tRNA129-MetCAT-tRF5 | 2.00  | -0.01 | 0.78 | 0.93 |
| rRNA       | LSU-rRNA_Hsa-L304        | 2.50  | 0.01  | 0.78 | 0.93 |
| mir-3p     | hsa-miR-548o-3p-L2       | 3.13  | 0.00  | 0.78 | 0.93 |
| rRNA       | LSU-rRNA_Hsa-L309        | 8.19  | 0.00  | 0.78 | 0.94 |
| scRNA      | HY1-L114                 | 3.94  | 0.00  | 0.78 | 0.94 |
| tRF3       | chr2.tRNA21-SerTGA-tRF3  | 2.33  | -0.01 | 0.78 | 0.94 |
| tRF3       | chr15.tRNA6-PseudoCTT-tR | 2.01  | -0.01 | 0.78 | 0.94 |
| mir-3p     | hsa-miR-652-3p           | 3.92  | 0.00  | 0.78 | 0.94 |
| scRNA      | HY4-L126                 | 3.61  | 0.00  | 0.78 | 0.94 |

|            |                            |       |       |      |      |
|------------|----------------------------|-------|-------|------|------|
| mir-5p     | hsa-miR-301a-5p            | 1.39  | -0.01 | 0.79 | 0.94 |
| rRNA       | 5S-L1152                   | 1.59  | 0.01  | 0.79 | 0.94 |
| snoRNA     | U58C                       | 3.37  | -0.01 | 0.79 | 0.94 |
| piRNA      | piR-34041                  | 4.17  | 0.00  | 0.79 | 0.94 |
| rRNA       | 5S-L790                    | 4.09  | 0.00  | 0.79 | 0.94 |
| snRNA      | U14-L3                     | 1.49  | 0.01  | 0.79 | 0.94 |
| rRNA       | LSU-rRNA_Hsa-L51           | 4.19  | 0.00  | 0.79 | 0.94 |
| rRNA       | LSU-rRNA_Hsa-L381          | 2.74  | 0.00  | 0.79 | 0.94 |
| mir-5p     | hsa-miR-129-5p-L2          | 1.82  | -0.01 | 0.79 | 0.94 |
| mir-5p3pno | hsa-miR-484                | 6.24  | 0.00  | 0.79 | 0.94 |
| mir-5p3pno | hsa-miR-378e               | 1.50  | -0.01 | 0.79 | 0.94 |
| snRNA      | U13_-L44                   | 1.56  | 0.01  | 0.79 | 0.94 |
| mir-5p     | hsa-miR-769-5p             | 3.02  | 0.00  | 0.79 | 0.94 |
| rRNA       | LSU-rRNA_Hsa-L164          | 5.97  | 0.00  | 0.80 | 0.94 |
| rRNA       | 5S-L746                    | 2.21  | -0.01 | 0.80 | 0.94 |
| snoRNA     | U58A                       | 5.02  | 0.00  | 0.80 | 0.94 |
| rRNA       | 5S-L1178                   | 1.51  | 0.00  | 0.80 | 0.95 |
| scRNA      | HY4-L34                    | 1.71  | 0.00  | 0.80 | 0.95 |
| tRNA       | chr16.tRNA16-LeuAAG        | 3.29  | 0.00  | 0.81 | 0.95 |
| rRNA       | 5S-L877                    | 2.33  | 0.00  | 0.81 | 0.95 |
| mir-3p     | hsa-let-7d-3p              | 6.61  | 0.00  | 0.81 | 0.95 |
| mir-5p     | hsa-miR-132-5p             | 2.49  | -0.01 | 0.81 | 0.95 |
| mir-5p     | hsa-let-7e-5p              | 5.52  | 0.00  | 0.81 | 0.95 |
| scRNA      | HY4-L56                    | 1.82  | 0.00  | 0.81 | 0.95 |
| scRNA      | HY4-L47                    | 2.67  | 0.00  | 0.81 | 0.95 |
| snoRNA     | U105                       | 2.35  | -0.01 | 0.81 | 0.95 |
| tRNA       | chr2.tRNA13-AlaCGC         | 6.52  | 0.00  | 0.81 | 0.95 |
| mir-5p     | hsa-miR-766-5p             | 1.81  | 0.00  | 0.81 | 0.95 |
| mir-3p     | hsa-miR-582-3p             | 4.81  | 0.00  | 0.81 | 0.95 |
| tRF3       | chr17.tRNA1-Pseudo???-tRNA | 2.09  | 0.00  | 0.81 | 0.95 |
| tRNA       | chr17.tRNA5-GlyGCC         | 7.52  | 0.00  | 0.81 | 0.95 |
| mir-5p     | hsa-miR-4732-5p            | 3.27  | 0.00  | 0.82 | 0.95 |
| mir-3p     | hsa-miR-3184-3p            | 11.60 | 0.00  | 0.82 | 0.95 |
| tRNA       | chr13.tRNA4-GluCTC         | 2.04  | 0.00  | 0.82 | 0.95 |
| mir-3p     | hsa-miR-181a-3p            | 2.62  | 0.00  | 0.82 | 0.95 |
| tRNA       | chr6.tRNA14-TyrGTA         | 1.90  | 0.01  | 0.82 | 0.95 |
| mir-5p     | hsa-miR-140-5p             | 4.20  | 0.00  | 0.82 | 0.95 |
| mir-5p3pno | hsa-miR-320e               | 1.85  | 0.00  | 0.82 | 0.95 |
| scRNA      | HY1-L442                   | 1.33  | -0.01 | 0.82 | 0.95 |
| scRNA      | HY3-L196                   | 1.85  | 0.00  | 0.82 | 0.95 |
| piRNA      | piR-31638-L3               | 7.00  | 0.00  | 0.82 | 0.95 |
| mir-3p     | hsa-miR-17-3p              | 1.53  | -0.01 | 0.82 | 0.95 |
| piRNA      | piR-61648-L7               | 4.08  | 0.00  | 0.82 | 0.95 |



|            |                          |      |       |      |      |
|------------|--------------------------|------|-------|------|------|
| scRNA      | BC200-L43                | 3.28 | 0.00  | 0.82 | 0.95 |
| tRNA       | chr6.tRNA40-ValTAC       | 2.73 | 0.00  | 0.82 | 0.95 |
| mir-5p     | hsa-miR-193b-5p          | 2.08 | -0.01 | 0.82 | 0.95 |
| piRNA      | piR-35548-L3             | 2.78 | 0.00  | 0.82 | 0.95 |
| tRNA       | chr6.tRNA136-ValAAC      | 2.04 | 0.00  | 0.83 | 0.95 |
| piRNA      | piR-37213                | 1.60 | 0.01  | 0.83 | 0.95 |
| tRNA       | chr5.tRNA15-ValAAC       | 4.70 | 0.00  | 0.83 | 0.95 |
| tRNA       | chr1.tRNA102-PseudoTTC   | 6.55 | 0.00  | 0.83 | 0.95 |
| mir-5p     | hsa-miR-3074-5p          | 9.31 | 0.00  | 0.83 | 0.95 |
| scRNA      | BC200-L27                | 2.96 | 0.00  | 0.83 | 0.95 |
| tRNA       | chr3.tRNA10-PseudoCTC    | 7.60 | 0.00  | 0.83 | 0.95 |
| tRNA       | chr16.tRNA7-LysCTT       | 2.24 | 0.00  | 0.83 | 0.95 |
| mir-3p     | hsa-miR-4732-3p          | 2.44 | -0.01 | 0.83 | 0.95 |
| rRNA       | 5S-L782                  | 3.63 | 0.00  | 0.83 | 0.95 |
| snoRNA     | U48                      | 5.72 | 0.00  | 0.83 | 0.95 |
| mir-3p     | hsa-miR-3150b-3p         | 1.47 | -0.01 | 0.83 | 0.95 |
| rRNA       | 5S-L471                  | 2.19 | 0.00  | 0.84 | 0.96 |
| tRF5       | chr1.tRNA109-PseudoGTT-t | 1.70 | 0.00  | 0.84 | 0.96 |
| mir-5p     | hsa-miR-642b-5p          | 1.56 | -0.01 | 0.84 | 0.96 |
| mir-5p     | hsa-miR-193a-5p          | 5.17 | 0.00  | 0.84 | 0.96 |
| scRNA      | HY1-L78                  | 1.39 | 0.00  | 0.84 | 0.96 |
| rRNA       | 5S-L804                  | 4.97 | 0.00  | 0.84 | 0.96 |
| scRNA      | HY1-L124                 | 1.84 | 0.00  | 0.84 | 0.96 |
| mir-3p     | hsa-miR-150-3p           | 2.88 | 0.00  | 0.85 | 0.96 |
| rRNA       | LSU-rRNA_Hsa-L360        | 1.84 | 0.00  | 0.85 | 0.96 |
| snoRNA     | U59B                     | 7.06 | 0.00  | 0.85 | 0.96 |
| piRNA      | piR-36707                | 5.03 | 0.00  | 0.85 | 0.96 |
| tRF3       | chr14.tRNA10-IleAAT-tRF3 | 2.47 | 0.01  | 0.85 | 0.96 |
| rRNA       | SSU-rRNA_Hsa-L25         | 4.08 | 0.00  | 0.85 | 0.96 |
| mir-5p3pno | hsa-miR-328              | 4.07 | 0.00  | 0.85 | 0.96 |
| snoRNA     | U42A                     | 4.44 | 0.00  | 0.85 | 0.96 |
| snRNA      | U5-L3                    | 2.02 | 0.00  | 0.85 | 0.96 |
| tRNA       | chr11.tRNA16-ValTAC      | 4.20 | 0.00  | 0.85 | 0.96 |
| piRNA      | piR-38600                | 3.94 | 0.00  | 0.85 | 0.96 |
| scRNA      | HY4-L147                 | 9.21 | 0.00  | 0.85 | 0.96 |
| tRF3       | chrX.tRNA2-LeuTAA-tRF3   | 1.82 | 0.00  | 0.85 | 0.96 |
| piRNA      | piR-61174                | 1.23 | 0.00  | 0.85 | 0.96 |
| mir-5p3pno | hsa-miR-1284             | 1.70 | -0.01 | 0.85 | 0.96 |
| rRNA       | 5S-L515                  | 2.06 | 0.00  | 0.85 | 0.96 |
| tRNA       | chr6.tRNA88-PseudoGAA    | 8.20 | 0.00  | 0.85 | 0.96 |
| mir-3p     | hsa-miR-3187-3p          | 1.63 | 0.00  | 0.86 | 0.96 |
| scRNA      | BC200-L82                | 1.75 | 0.00  | 0.86 | 0.96 |
| mir-5p3pno | hsa-miR-3138             | 1.71 | 0.00  | 0.86 | 0.96 |

|        |                          |       |      |      |      |
|--------|--------------------------|-------|------|------|------|
| rRNA   | 5S-L955                  | 1.52  | 0.00 | 0.86 | 0.96 |
| piRNA  | piR-47305                | 9.66  | 0.00 | 0.86 | 0.96 |
| tRNA   | chr2.tRNA11-PseudoTTG    | 6.71  | 0.00 | 0.86 | 0.96 |
| mir-5p | hsa-miR-100-5p           | 6.59  | 0.00 | 0.86 | 0.96 |
| mir-5p | hsa-miR-338-5p           | 4.39  | 0.00 | 0.86 | 0.96 |
| rRNA   | LSU-rRNA_Hsa-L380        | 13.98 | 0.00 | 0.86 | 0.96 |
| tRNA   | chr1.tRNA79-GlyTCC       | 1.87  | 0.00 | 0.86 | 0.96 |
| mir-5p | hsa-miR-1228-5p          | 2.00  | 0.00 | 0.86 | 0.96 |
| scRNA  | HY1-L321                 | 4.61  | 0.00 | 0.86 | 0.96 |
| scRNA  | HY3-L492                 | 1.45  | 0.00 | 0.86 | 0.96 |
| mir-5p | hsa-miR-550a-3-5p        | 1.55  | 0.00 | 0.86 | 0.96 |
| snoRNA | U80                      | 3.36  | 0.00 | 0.86 | 0.96 |
| scRNA  | HY3-L34                  | 3.61  | 0.00 | 0.87 | 0.96 |
| scRNA  | BC200-L161               | 1.53  | 0.00 | 0.87 | 0.96 |
| rRNA   | LSU-rRNA_Hsa-L109        | 1.47  | 0.00 | 0.87 | 0.96 |
| tRNA   | chr1.tRNA54-LysTTT       | 8.24  | 0.00 | 0.87 | 0.96 |
| scRNA  | HY3-L382                 | 1.28  | 0.00 | 0.87 | 0.96 |
| mir-5p | hsa-miR-20b-5p           | 3.49  | 0.00 | 0.87 | 0.96 |
| tRNA   | chr5.tRNA6-ValCAC        | 10.69 | 0.00 | 0.87 | 0.96 |
| tRF5   | chrX.tRNA1-PseudoTTG-tRF | 2.77  | 0.00 | 0.87 | 0.96 |
| mir-3p | hsa-miR-500a-3p          | 3.33  | 0.00 | 0.87 | 0.96 |
| rRNA   | LSU-rRNA_Hsa-L124        | 2.33  | 0.00 | 0.87 | 0.96 |
| snRNA  | U3-L74                   | 2.45  | 0.00 | 0.87 | 0.96 |
| mir-5p | hsa-miR-335-5p           | 3.57  | 0.00 | 0.87 | 0.96 |
| tRNA   | chr16.tRNA32-LysCTT      | 2.11  | 0.00 | 0.87 | 0.96 |
| scRNA  | HY1-L269                 | 1.87  | 0.00 | 0.87 | 0.96 |
| snRNA  | U3-L79                   | 3.27  | 0.00 | 0.88 | 0.96 |
| tRNA   | chr6.tRNA157-ValCAC      | 1.40  | 0.00 | 0.88 | 0.96 |
| mir-5p | hsa-miR-10b-5p           | 10.26 | 0.00 | 0.88 | 0.96 |
| piRNA  | piR-36412                | 2.36  | 0.00 | 0.88 | 0.96 |
| mir-5p | hsa-miR-548ay-5p         | 2.18  | 0.00 | 0.88 | 0.96 |
| piRNA  | piR-43995-L4             | 6.52  | 0.00 | 0.88 | 0.96 |
| tRNA   | chr2.tRNA25-PseudoCTC    | 8.69  | 0.00 | 0.88 | 0.96 |
| piRNA  | piR-59299                | 1.72  | 0.00 | 0.88 | 0.96 |
| mir-3p | hsa-miR-130b-3p          | 2.46  | 0.00 | 0.88 | 0.96 |
| tRF5   | chr6.tRNA109-PheGAA-tRF5 | 2.26  | 0.00 | 0.88 | 0.96 |
| tRNA   | chr6.tRNA131-GlnCTG      | 1.62  | 0.00 | 0.88 | 0.96 |
| scRNA  | HY3-L497                 | 2.14  | 0.00 | 0.88 | 0.96 |
| snoRNA | ACA44                    | 2.30  | 0.00 | 0.88 | 0.96 |
| scRNA  | BC200-L91                | 1.97  | 0.00 | 0.88 | 0.96 |
| tRF5   | chr6.tRNA78-LeuAAG-tRF5  | 1.31  | 0.01 | 0.89 | 0.96 |
| scRNA  | HY3-L190                 | 2.20  | 0.00 | 0.89 | 0.96 |
| piRNA  | piR-52416-L2             | 2.29  | 0.00 | 0.89 | 0.96 |

|            |                          |       |      |      |      |
|------------|--------------------------|-------|------|------|------|
| tRNA       | chr9.tRNA4-ArgTCT        | 1.63  | 0.00 | 0.89 | 0.96 |
| snoRNA     | U53                      | 2.71  | 0.00 | 0.89 | 0.96 |
| scRNA      | HY1-L174                 | 1.36  | 0.00 | 0.89 | 0.96 |
| rRNA       | LSU-rRNA_Hsa-L375        | 10.09 | 0.00 | 0.89 | 0.96 |
| tRF3       | chr17.tRNA33-PseudoTTG-t | 4.41  | 0.00 | 0.89 | 0.96 |
| tRNA       | chr14.tRNA12-PseudoTTT   | 1.55  | 0.00 | 0.89 | 0.96 |
| scRNA      | HY1-L261                 | 1.76  | 0.00 | 0.89 | 0.96 |
| snoRNA     | HBII-82B                 | 2.38  | 0.00 | 0.89 | 0.96 |
| tRNA       | chr5.tRNA8-AlaTGC        | 3.15  | 0.00 | 0.89 | 0.96 |
| scRNA      | HY4-L50                  | 1.52  | 0.00 | 0.89 | 0.96 |
| tRNA       | chr1.tRNA4-GlyCCC        | 5.56  | 0.00 | 0.90 | 0.96 |
| mir-5p     | hsa-miR-27b-5p           | 1.72  | 0.00 | 0.90 | 0.96 |
| mir-3p     | hsa-miR-3177-3p          | 1.68  | 0.00 | 0.90 | 0.97 |
| scRNA      | HY4-L20                  | 3.35  | 0.00 | 0.90 | 0.97 |
| mir-3p     | hsa-miR-142-3p           | 5.68  | 0.00 | 0.90 | 0.97 |
| snoRNA     | U87                      | 1.66  | 0.00 | 0.90 | 0.97 |
| tRF3       | chr10.tRNA2-SerTGA-tRF3  | 2.00  | 0.00 | 0.91 | 0.97 |
| mir-3p     | hsa-miR-10a-3p           | 1.82  | 0.00 | 0.91 | 0.97 |
| scRNA      | HY1-L106                 | 1.92  | 0.00 | 0.91 | 0.97 |
| mir-3p     | hsa-miR-548g-3p          | 2.15  | 0.00 | 0.91 | 0.97 |
| mir-5p3pno | hsa-miR-421              | 2.78  | 0.00 | 0.91 | 0.97 |
| tRNA       | chr2.tRNA27-GlyCCC       | 8.80  | 0.00 | 0.91 | 0.97 |
| snoRNA     | HBII-85-3                | 2.58  | 0.00 | 0.91 | 0.97 |
| rRNA       | LSU-rRNA_Hsa-L341        | 1.93  | 0.00 | 0.92 | 0.97 |
| mir-5p     | hsa-miR-145-5p           | 1.79  | 0.00 | 0.92 | 0.97 |
| tRNA       | chr6.tRNA129-MetCAT      | 5.33  | 0.00 | 0.92 | 0.98 |
| snoRNA     | ACA9                     | 1.70  | 0.00 | 0.92 | 0.98 |
| snRNA      | U17                      | 1.81  | 0.00 | 0.92 | 0.98 |
| tRNA       | chr6.tRNA75-MetCAT       | 1.36  | 0.00 | 0.92 | 0.98 |
| mir-5p     | hsa-miR-30a-5p           | 7.14  | 0.00 | 0.93 | 0.98 |
| snRNA      | U2-L285                  | 2.96  | 0.00 | 0.93 | 0.98 |
| scRNA      | HY1-L191                 | 3.51  | 0.00 | 0.93 | 0.98 |
| mir-5p     | hsa-miR-196b-5p          | 2.79  | 0.00 | 0.93 | 0.98 |
| snoRNA     | U3-3                     | 2.21  | 0.00 | 0.93 | 0.98 |
| mir-5p     | hsa-miR-106b-5p          | 3.53  | 0.00 | 0.93 | 0.98 |
| mir-5p3pno | hsa-miR-941              | 6.39  | 0.00 | 0.93 | 0.98 |
| rRNA       | 5S-L1009                 | 2.50  | 0.00 | 0.93 | 0.98 |
| snoRNA     | U49B                     | 1.62  | 0.01 | 0.93 | 0.98 |
| mir-5p     | hsa-miR-26b-5p           | 8.15  | 0.00 | 0.93 | 0.98 |
| rRNA       | LSU-rRNA_Hsa-L144        | 1.61  | 0.00 | 0.93 | 0.98 |
| piRNA      | piR-60577-L3             | 7.08  | 0.00 | 0.93 | 0.98 |
| rRNA       | 5S-L676                  | 1.34  | 0.00 | 0.93 | 0.98 |
| tRF5       | chr16.tRNA8-ProTGG-tRF5  | 2.11  | 0.00 | 0.94 | 0.98 |

|            |                            |      |      |      |      |
|------------|----------------------------|------|------|------|------|
| mir-5p     | hsa-miR-345-5p             | 2.70 | 0.00 | 0.94 | 0.98 |
| snoRNA     | HBII-289                   | 7.18 | 0.00 | 0.94 | 0.98 |
| snRNA      | U1-L39                     | 1.74 | 0.00 | 0.94 | 0.98 |
| snoRNA     | U66                        | 1.79 | 0.00 | 0.94 | 0.98 |
| scRNA      | HY4-L36                    | 2.19 | 0.00 | 0.94 | 0.98 |
| mir-5p3pno | hsa-let-7c-L2              | 5.48 | 0.00 | 0.94 | 0.98 |
| rRNA       | LSU-rRNA_Hsa-L283          | 2.11 | 0.01 | 0.94 | 0.98 |
| snRNA      | U17-L2                     | 2.12 | 0.00 | 0.94 | 0.98 |
| rRNA       | 5S-L627                    | 1.59 | 0.00 | 0.94 | 0.98 |
| mir-5p3pno | hsa-miR-378c               | 5.35 | 0.00 | 0.94 | 0.98 |
| snRNA      | U5-L133                    | 2.24 | 0.00 | 0.94 | 0.98 |
| tRNA       | chr1.tRNA85-ValCAC         | 3.44 | 0.00 | 0.94 | 0.98 |
| tRNA       | chr2.tRNA14-TyrATA         | 3.30 | 0.00 | 0.94 | 0.98 |
| mir-5p3pno | hsa-miR-548k               | 1.89 | 0.00 | 0.94 | 0.98 |
| scRNA      | HY4-L146                   | 1.61 | 0.00 | 0.94 | 0.98 |
| snoRNA     | U60                        | 4.22 | 0.00 | 0.94 | 0.98 |
| tRF5       | chr6.tRNA130-GlnTTG-tRF5   | 1.89 | 0.00 | 0.94 | 0.98 |
| mir-5p3pno | hsa-miR-494                | 1.75 | 0.00 | 0.95 | 0.98 |
| snRNA      | U3-L78                     | 4.40 | 0.00 | 0.95 | 0.98 |
| scRNA      | BC200-L96                  | 5.30 | 0.00 | 0.95 | 0.99 |
| snoRNA     | HBII-142                   | 3.42 | 0.00 | 0.96 | 0.99 |
| tRF3       | chr10.tRNA5-PseudoCTG-tRF3 | 1.70 | 0.00 | 0.96 | 0.99 |
| mir-3p     | hsa-miR-378a-3p            | 8.57 | 0.00 | 0.96 | 0.99 |
| snoRNA     | U102                       | 7.38 | 0.00 | 0.96 | 0.99 |
| scRNA      | HY1-L25                    | 1.88 | 0.00 | 0.96 | 0.99 |
| mir-5p     | hsa-let-7d-5p              | 8.11 | 0.00 | 0.96 | 0.99 |
| snoRNA     | U37                        | 1.76 | 0.00 | 0.96 | 0.99 |
| snRNA      | U2-L288                    | 2.57 | 0.00 | 0.96 | 0.99 |
| rRNA       | 5S-L357                    | 2.11 | 0.00 | 0.96 | 0.99 |
| scRNA      | BC200-L28                  | 2.06 | 0.00 | 0.96 | 0.99 |
| scRNA      | HY3-L287                   | 1.40 | 0.00 | 0.96 | 0.99 |
| mir-3p     | hsa-miR-30c-2-3p           | 1.38 | 0.00 | 0.96 | 0.99 |
| scRNA      | HY4-L30                    | 3.53 | 0.00 | 0.97 | 0.99 |
| scRNA      | BC200-L154                 | 1.41 | 0.00 | 0.97 | 0.99 |
| piRNA      | piR-41209-L2               | 3.73 | 0.00 | 0.97 | 0.99 |
| mir-5p3pno | hsa-miR-215                | 3.83 | 0.00 | 0.97 | 0.99 |
| mir-3p     | hsa-miR-324-3p             | 1.81 | 0.00 | 0.97 | 0.99 |
| mir-5p3pno | hsa-miR-1976               | 1.89 | 0.00 | 0.97 | 0.99 |
| snoRNA     | U94                        | 3.12 | 0.00 | 0.97 | 0.99 |
| scRNA      | BC200-L54                  | 4.73 | 0.00 | 0.97 | 0.99 |
| scRNA      | HY3-L518                   | 8.30 | 0.00 | 0.97 | 0.99 |
| snoRNA     | U3-4                       | 7.31 | 0.00 | 0.97 | 0.99 |
| scRNA      | HY1-L414                   | 1.30 | 0.00 | 0.97 | 0.99 |

|        |                    |      |      |      |      |
|--------|--------------------|------|------|------|------|
| piRNA  | piR-45195-L2       | 1.33 | 0.01 | 0.97 | 0.99 |
| rRNA   | LSU-rRNA_Hsa-L295  | 3.46 | 0.00 | 0.97 | 0.99 |
| mir-5p | hsa-miR-99a-5p     | 7.41 | 0.00 | 0.97 | 0.99 |
| snRNA  | U7-L212            | 2.30 | 0.00 | 0.97 | 0.99 |
| snoRNA | ACA66              | 2.24 | 0.00 | 0.98 | 0.99 |
| mir-5p | hsa-miR-22-5p      | 3.80 | 0.00 | 0.98 | 0.99 |
| tRNA   | chr1.tRNA9-ArgTCT  | 2.50 | 0.00 | 0.98 | 0.99 |
| rRNA   | LSU-rRNA_Hsa-L162  | 2.42 | 0.00 | 0.98 | 0.99 |
| tRNA   | chrX.tRNA2-LeuTAA  | 1.38 | 0.00 | 0.98 | 0.99 |
| mir-5p | hsa-miR-96-5p      | 2.20 | 0.00 | 0.98 | 0.99 |
| snRNA  | U2-L481            | 1.44 | 0.00 | 0.98 | 0.99 |
| tRNA   | chr6.tRNA84-GlnTTG | 1.52 | 0.00 | 0.98 | 0.99 |
| mir-3p | hsa-miR-335-3p     | 3.66 | 0.00 | 0.98 | 0.99 |
| tRNA   | chr6.tRNA66-AlaTGC | 1.95 | 0.00 | 0.98 | 0.99 |
| piRNA  | piR-31987          | 6.33 | 0.00 | 0.99 | 1.00 |
| scRNA  | HY4-L61            | 5.54 | 0.00 | 0.99 | 1.00 |
| mir-5p | hsa-miR-450a-5p    | 3.31 | 0.00 | 0.99 | 1.00 |
| snoRNA | ACA11              | 2.12 | 0.00 | 0.99 | 1.00 |
| snoRNA | U52                | 2.73 | 0.00 | 0.99 | 1.00 |
| rRNA   | 5S-L1067           | 2.57 | 0.00 | 0.99 | 1.00 |
| scRNA  | HY3-L272           | 1.38 | 0.00 | 0.99 | 1.00 |
| scRNA  | HY4-L109           | 2.11 | 0.00 | 0.99 | 1.00 |
| scRNA  | HY1-L103           | 2.46 | 0.00 | 0.99 | 1.00 |
| rRNA   | 5S-L990            | 3.08 | 0.00 | 0.99 | 1.00 |
| scRNA  | BC200-L29          | 2.92 | 0.00 | 1.00 | 1.00 |
| rRNA   | LSU-rRNA_Hsa-L174  | 1.61 | 0.00 | 1.00 | 1.00 |
| rRNA   | LSU-rRNA_Hsa-L339  | 2.35 | 0.00 | 1.00 | 1.00 |
| scRNA  | HY4-L38            | 4.19 | 0.00 | 1.00 | 1.00 |
| mir-3p | hsa-miR-26b-3p     | 2.34 | 0.00 | 1.00 | 1.00 |

**Supplementary Table 12: RNA correlations with disease duration**

| <i>RNA type</i> | <i>ID</i>           | <i>Average read count (log2 CPM)</i> | <i>Correlation coefficient</i> | <i>P-value</i> | <i>Adjusted P-value</i> |
|-----------------|---------------------|--------------------------------------|--------------------------------|----------------|-------------------------|
| scRNA           | BC200-L96           | 5.30                                 | 0.01                           | 1.01E-04       | 5.93E-02                |
| snoRNA          | U90                 | 2.75                                 | 0.02                           | 1.13E-04       | 5.93E-02                |
| piRNA           | piR-35468           | 4.14                                 | -0.06                          | 1.20E-04       | 5.93E-02                |
| snoRNA          | U46                 | 4.48                                 | 0.02                           | 2.90E-04       | 0.11                    |
| tRNA            | chr1.tRNA38-LeuCAG  | 3.68                                 | -0.05                          | 3.70E-04       | 0.11                    |
| tRNA            | chr14.tRNA16-TyrGTA | 3.58                                 | -0.06                          | 4.29E-04       | 0.11                    |
| scRNA           | HY4-L11             | 1.48                                 | -0.08                          | 1.05E-03       | 0.22                    |
| scRNA           | BC200-L12           | 1.72                                 | -0.09                          | 1.26E-03       | 0.23                    |
| snoRNA          | U58B                | 4.91                                 | 0.01                           | 1.40E-03       | 0.23                    |
| tRNA            | chr14.tRNA8-CysGCA  | 4.27                                 | -0.08                          | 1.61E-03       | 0.24                    |
| rRNA            | LSU-rRNA_Hsa-L409   | 4.71                                 | -0.02                          | 1.78E-03       | 0.24                    |
| rRNA            | 5S-L530             | 5.17                                 | -0.05                          | 2.54E-03       | 0.30                    |
| snoRNA          | U30                 | 6.13                                 | 0.01                           | 2.80E-03       | 0.30                    |
| mir-5p          | hsa-miR-744-5p      | 6.54                                 | -0.01                          | 2.92E-03       | 0.30                    |
| mir-5p          | hsa-miR-155-5p      | 4.35                                 | -0.02                          | 2.98E-03       | 0.30                    |
| rRNA            | LSU-rRNA_Hsa-L63    | 4.97                                 | -0.06                          | 3.31E-03       | 0.31                    |
| snoRNA          | HBII-99             | 4.90                                 | 0.01                           | 4.20E-03       | 0.37                    |
| scRNA           | BC200-L165          | 1.54                                 | -0.06                          | 5.22E-03       | 0.43                    |
| scRNA           | BC200-L85           | 1.95                                 | -0.06                          | 6.20E-03       | 0.47                    |
| piRNA           | piR-61465           | 3.75                                 | 0.01                           | 6.27E-03       | 0.47                    |
| tRNA            | chr12.tRNA11-PheGAA | 1.77                                 | -0.08                          | 7.12E-03       | 0.50                    |
| tRNA            | chr11.tRNA13-PheGAA | 3.60                                 | -0.04                          | 7.72E-03       | 0.50                    |
| scRNA           | BC200-L110          | 1.47                                 | -0.07                          | 8.06E-03       | 0.50                    |
| snoRNA          | U29                 | 5.29                                 | 0.01                           | 8.12E-03       | 0.50                    |
| rRNA            | LSU-rRNA_Hsa-L345   | 2.84                                 | -0.05                          | 8.84E-03       | 0.50                    |
| mir-5p          | hsa-miR-186-5p      | 6.23                                 | -0.02                          | 9.02E-03       | 0.50                    |
| scRNA           | BC200-L24           | 2.86                                 | 0.01                           | 9.22E-03       | 0.50                    |
| mir-3p          | hsa-miR-708-3p      | 1.52                                 | 0.01                           | 1.02E-02       | 0.50                    |
| tRNA            | chr1.tRNA116-GluCTC | 3.79                                 | -0.02                          | 1.02E-02       | 0.50                    |
| piRNA           | piR-36499           | 1.68                                 | -0.05                          | 1.03E-02       | 0.50                    |
| snoRNA          | U16                 | 2.75                                 | 0.01                           | 1.04E-02       | 0.50                    |
| piRNA           | piR-33382-L2        | 2.24                                 | -0.07                          | 1.15E-02       | 0.52                    |
| tRNA            | chr6.tRNA172-SerTGA | 1.90                                 | -0.07                          | 1.16E-02       | 0.52                    |
| scRNA           | BC200-L164          | 2.30                                 | -0.04                          | 1.25E-02       | 0.52                    |
| scRNA           | HY1-L175            | 2.06                                 | 0.01                           | 1.27E-02       | 0.52                    |
| snoRNA          | U43                 | 4.95                                 | 0.01                           | 1.29E-02       | 0.52                    |
| mir-3p          | hsa-miR-144-3p      | 5.77                                 | -0.02                          | 1.41E-02       | 0.52                    |
| tRNA            | chr6.tRNA73-ArgCCG  | 2.37                                 | -0.04                          | 1.42E-02       | 0.52                    |
| scRNA           | HY4-L149            | 1.76                                 | -0.04                          | 1.43E-02       | 0.52                    |

|            |                        |      |       |          |      |
|------------|------------------------|------|-------|----------|------|
| scRNA      | HY1-L57                | 2.78 | -0.03 | 1.45E-02 | 0.52 |
| tRNA       | chr17.tRNA23-ArgCCG    | 3.40 | 0.01  | 1.45E-02 | 0.52 |
| snoRNA     | U44                    | 6.36 | 0.01  | 1.55E-02 | 0.55 |
| tRF5       | chr6.tRNA78-LeuAAG-tRF | 1.31 | 0.02  | 1.70E-02 | 0.57 |
| tRNA       | chr16.tRNA7-LysCTT     | 2.24 | 0.01  | 1.72E-02 | 0.57 |
| mir-5p     | hsa-miR-3605-5p        | 2.60 | -0.04 | 1.77E-02 | 0.57 |
| tRNA       | chr16.tRNA22-MetCAT    | 3.03 | -0.03 | 1.77E-02 | 0.57 |
| rRNA       | LSU-rRNA_Hsa-L367      | 7.90 | -0.01 | 1.85E-02 | 0.58 |
| snoRNA     | HBII-180C              | 4.12 | 0.01  | 1.92E-02 | 0.59 |
| mir-3p     | hsa-miR-335-3p         | 3.66 | -0.03 | 1.96E-02 | 0.59 |
| mir-5p3pno | hsa-miR-328            | 4.07 | -0.02 | 2.00E-02 | 0.59 |
| rRNA       | LSU-rRNA_Hsa-L140      | 4.43 | -0.02 | 2.03E-02 | 0.59 |
| scRNA      | HY1-L159               | 4.34 | -0.01 | 2.09E-02 | 0.59 |
| scRNA      | HY4-L103               | 4.44 | -0.02 | 2.13E-02 | 0.59 |
| mir-3p     | hsa-miR-339-3p         | 2.88 | -0.03 | 2.14E-02 | 0.59 |
| scRNA      | BC200-L167             | 1.58 | -0.05 | 2.18E-02 | 0.59 |
| tRNA       | chr17.tRNA36-ThrAGT    | 2.02 | -0.04 | 2.28E-02 | 0.59 |
| snRNA      | U7-L207                | 2.19 | -0.05 | 2.30E-02 | 0.59 |
| tRNA       | chr19.tRNA13-ValCAC    | 4.33 | -0.02 | 2.32E-02 | 0.59 |
| rRNA       | 5S-L71                 | 1.74 | -0.04 | 2.40E-02 | 0.59 |
| rRNA       | 5S-L472                | 2.70 | -0.03 | 2.41E-02 | 0.59 |
| rRNA       | 5S-L1179               | 1.46 | 0.01  | 2.44E-02 | 0.59 |
| scRNA      | BC200-L13              | 2.84 | -0.04 | 2.49E-02 | 0.60 |
| snoRNA     | snR39B                 | 5.72 | 0.01  | 2.66E-02 | 0.63 |
| scRNA      | HY3-L372               | 2.47 | -0.04 | 2.74E-02 | 0.63 |
| piRNA      | piR-35548-L2           | 7.18 | -0.01 | 2.76E-02 | 0.63 |
| mir-3p     | hsa-miR-29c-3p         | 1.99 | 0.01  | 2.82E-02 | 0.63 |
| scRNA      | HY3-L105               | 3.97 | -0.02 | 2.94E-02 | 0.65 |
| mir-5p     | hsa-miR-425-5p         | 5.12 | -0.01 | 3.00E-02 | 0.65 |
| rRNA       | LSU-rRNA_Hsa-L305      | 5.25 | -0.02 | 3.05E-02 | 0.65 |
| mir-5p     | hsa-miR-98-5p          | 6.17 | -0.01 | 3.10E-02 | 0.65 |
| rRNA       | LSU-rRNA_Hsa-L298      | 3.46 | -0.03 | 3.11E-02 | 0.65 |
| scRNA      | HY5-L11                | 5.18 | -0.02 | 3.20E-02 | 0.65 |
| mir-5p     | hsa-miR-140-5p         | 4.19 | -0.02 | 3.20E-02 | 0.65 |
| rRNA       | 5S-L1114               | 1.68 | -0.04 | 3.44E-02 | 0.66 |
| rRNA       | LSU-rRNA_Hsa-L147      | 2.70 | -0.04 | 3.44E-02 | 0.66 |
| mir-3p     | hsa-miR-16-2-3p        | 7.97 | -0.01 | 3.50E-02 | 0.66 |
| mir-5p3pno | hsa-miR-320c           | 4.43 | -0.01 | 3.55E-02 | 0.66 |
| mir-3p     | hsa-miR-363-3p         | 7.85 | -0.01 | 3.60E-02 | 0.66 |
| rRNA       | LSU-rRNA_Hsa-L34       | 1.35 | -0.05 | 3.60E-02 | 0.66 |
| tRNA       | chrX.tRNA4-ValTAC      | 5.20 | -0.01 | 3.63E-02 | 0.66 |
| mir-5p     | hsa-miR-26b-5p         | 8.15 | -0.01 | 3.67E-02 | 0.66 |
| rRNA       | LSU-rRNA_Hsa-L331      | 1.53 | -0.04 | 3.70E-02 | 0.66 |

|            |                         |       |       |          |      |
|------------|-------------------------|-------|-------|----------|------|
| rRNA       | 5S-L583                 | 2.68  | -0.05 | 3.72E-02 | 0.66 |
| mir-3p     | hsa-miR-499b-3p         | 3.26  | 0.01  | 3.75E-02 | 0.66 |
| tRNA       | chr6.tRNA148-SerTGA     | 3.56  | -0.03 | 3.77E-02 | 0.66 |
| mir-5p     | hsa-miR-17-5p           | 5.08  | -0.02 | 3.81E-02 | 0.66 |
| tRNA       | chr6.tRNA138-ArgACG     | 1.66  | -0.05 | 3.84E-02 | 0.66 |
| scRNA      | HY1-L25                 | 1.88  | -0.03 | 3.93E-02 | 0.66 |
| snoRNA     | U24                     | 2.09  | 0.01  | 4.04E-02 | 0.67 |
| tRNA       | chr7.tRNA8-CysGCA       | 1.87  | -0.05 | 4.13E-02 | 0.67 |
| rRNA       | SSU-rRNA_Hsa-L65        | 4.28  | -0.01 | 4.15E-02 | 0.67 |
| mir-5p3pno | hsa-miR-103b            | 8.26  | -0.01 | 4.17E-02 | 0.67 |
| mir-5p     | hsa-let-7a-5p-L3        | 12.09 | -0.01 | 4.18E-02 | 0.67 |
| rRNA       | 5S-L255                 | 2.65  | -0.02 | 4.21E-02 | 0.67 |
| mir-3p     | hsa-miR-340-3p          | 4.29  | -0.02 | 4.33E-02 | 0.68 |
| snRNA      | U1-L8                   | 6.14  | -0.01 | 4.50E-02 | 0.69 |
| mir-5p     | hsa-let-7g-5p           | 11.06 | -0.01 | 4.53E-02 | 0.69 |
| mir-5p3pno | hsa-miR-4472-L2         | 1.83  | -0.04 | 4.59E-02 | 0.70 |
| rRNA       | 5S-L621                 | 1.23  | 0.01  | 4.72E-02 | 0.70 |
| snoRNA     | U58A                    | 5.02  | 0.01  | 4.72E-02 | 0.70 |
| scRNA      | HY4-L44                 | 1.59  | -0.04 | 4.76E-02 | 0.70 |
| scRNA      | BC200-L4                | 3.40  | -0.02 | 4.78E-02 | 0.70 |
| snoRNA     | U104                    | 7.46  | 0.01  | 5.02E-02 | 0.72 |
| tRF3       | chr6.tRNA153-IleAAT-tRF | 2.68  | 0.02  | 5.05E-02 | 0.72 |
| scRNA      | BC200-L122              | 3.31  | -0.02 | 5.31E-02 | 0.74 |
| piRNA      | piR-57516               | 5.25  | -0.01 | 5.37E-02 | 0.74 |
| rRNA       | LSU-rRNA_Hsa-L159       | 2.56  | -0.02 | 5.37E-02 | 0.74 |
| mir-3p     | hsa-miR-374a-3p         | 3.84  | -0.02 | 5.49E-02 | 0.74 |
| rRNA       | 5S-L946                 | 9.07  | 0.00  | 5.57E-02 | 0.74 |
| tRNA       | chr17.tRNA16-GlnTTG     | 2.36  | -0.03 | 5.65E-02 | 0.74 |
| tRNA       | chr12.tRNA2-SerCGA      | 1.52  | -0.06 | 5.66E-02 | 0.74 |
| snoRNA     | mgU2-19/30              | 3.71  | -0.01 | 5.68E-02 | 0.74 |
| rRNA       | LSU-rRNA_Hsa-L174       | 1.61  | -0.04 | 5.68E-02 | 0.74 |
| mir-3p     | hsa-miR-4677-3p         | 1.78  | -0.04 | 5.88E-02 | 0.74 |
| tRNA       | chr17.tRNA5-GlyGCC      | 7.52  | -0.01 | 5.90E-02 | 0.74 |
| snoRNA     | U8-L17                  | 2.67  | -0.03 | 5.92E-02 | 0.74 |
| mir-5p     | hsa-miR-196b-5p         | 2.79  | 0.01  | 6.12E-02 | 0.74 |
| tRNA       | chr6.tRNA38-IleAAT      | 3.15  | -0.04 | 6.17E-02 | 0.74 |
| rRNA       | 5S-L782                 | 3.63  | -0.01 | 6.22E-02 | 0.74 |
| scRNA      | HY4-L147                | 9.21  | 0.00  | 6.25E-02 | 0.74 |
| tRF5       | chr17.tRNA25-SeCTCA-tRF | 2.25  | -0.03 | 6.27E-02 | 0.74 |
| piRNA      | piR-33468-L4            | 2.34  | -0.02 | 6.32E-02 | 0.74 |
| rRNA       | LSU-rRNA_Hsa-L236       | 1.43  | -0.04 | 6.34E-02 | 0.74 |
| mir-3p     | hsa-miR-125b-2-3p       | 1.53  | -0.05 | 6.35E-02 | 0.74 |
| snRNA      | U3-L205                 | 4.79  | -0.01 | 6.42E-02 | 0.74 |



|            |                        |       |       |          |      |
|------------|------------------------|-------|-------|----------|------|
| mir-5p     | hsa-miR-20a-5p         | 7.17  | -0.01 | 6.47E-02 | 0.74 |
| tRNA       | chr6.tRNA77-GluCTC     | 4.24  | -0.01 | 6.50E-02 | 0.74 |
| snRNA      | U5-L76                 | 2.56  | -0.03 | 6.53E-02 | 0.74 |
| tRNA       | chr6.tRNA168-TrpCCA    | 2.05  | -0.04 | 6.57E-02 | 0.74 |
| tRNA       | chr6.tRNA36-ArgACG     | 1.39  | -0.05 | 6.57E-02 | 0.74 |
| mir-3p     | hsa-miR-200b-3p        | 1.87  | -0.04 | 6.58E-02 | 0.74 |
| piRNA      | piR-31115-L4           | 7.28  | -0.01 | 6.64E-02 | 0.74 |
| scRNA      | BC200-L82              | 1.75  | -0.04 | 6.64E-02 | 0.74 |
| tRNA       | chr12.tRNA10-AspGTC    | 4.59  | -0.02 | 6.74E-02 | 0.75 |
| mir-5p     | hsa-miR-589-5p         | 4.55  | 0.01  | 6.92E-02 | 0.75 |
| mir-5p     | hsa-miR-125a-5p        | 4.98  | -0.01 | 7.04E-02 | 0.75 |
| scRNA      | BC200-L155             | 2.70  | -0.03 | 7.05E-02 | 0.75 |
| scRNA      | HY4-L92                | 1.42  | -0.04 | 7.07E-02 | 0.75 |
| tRNA       | chr6.tRNA175-SerGCT    | 2.06  | -0.06 | 7.11E-02 | 0.75 |
| tRNA       | chr6.tRNA153-IleAAT    | 1.68  | 0.01  | 7.12E-02 | 0.75 |
| mir-3p     | hsa-miR-629-3p         | 1.42  | -0.04 | 7.22E-02 | 0.75 |
| tRF3       | chr19.tRNA9-PseudoTTT- | 1.65  | -0.05 | 7.22E-02 | 0.75 |
| mir-3p     | hsa-miR-221-3p         | 7.16  | -0.01 | 7.28E-02 | 0.75 |
| tRNA       | chr6.tRNA143-LysTTT    | 5.55  | -0.01 | 7.35E-02 | 0.75 |
| scRNA      | HY1-L280               | 2.44  | -0.03 | 7.36E-02 | 0.75 |
| scRNA      | HY3-L34                | 3.61  | -0.02 | 7.68E-02 | 0.78 |
| mir-3p     | hsa-miR-200c-3p        | 2.75  | -0.02 | 7.69E-02 | 0.78 |
| tRNA       | chr16.tRNA25-GlyGCC    | 4.78  | -0.01 | 7.94E-02 | 0.78 |
| tRNA       | chr16.tRNA29-ProAGG    | 2.96  | -0.02 | 7.95E-02 | 0.78 |
| rRNA       | LSU-rRNA_Hsa-L188      | 1.82  | -0.04 | 7.99E-02 | 0.78 |
| piRNA      | piR-49143              | 11.96 | 0.00  | 8.04E-02 | 0.78 |
| rRNA       | LSU-rRNA_Hsa-L247      | 1.53  | -0.03 | 8.26E-02 | 0.78 |
| mir-5p     | hsa-miR-144-5p         | 5.62  | -0.01 | 8.28E-02 | 0.78 |
| mir-5p     | hsa-miR-4732-5p        | 3.28  | -0.02 | 8.37E-02 | 0.78 |
| mir-5p3pno | hsa-miR-4488           | 1.35  | -0.04 | 8.42E-02 | 0.78 |
| scRNA      | BC200-L38              | 1.59  | 0.02  | 8.43E-02 | 0.78 |
| rRNA       | LSU-rRNA_Hsa-L93       | 7.67  | -0.01 | 8.46E-02 | 0.78 |
| rRNA       | 5S-L103                | 3.03  | -0.01 | 8.48E-02 | 0.78 |
| tRNA       | chr2.tRNA6-GluTTC      | 4.09  | -0.01 | 8.56E-02 | 0.78 |
| mir-5p3pno | hsa-miR-2110           | 5.17  | -0.01 | 8.58E-02 | 0.78 |
| rRNA       | SSU-rRNA_Hsa-L25       | 4.08  | -0.01 | 8.60E-02 | 0.78 |
| tRNA       | chr1.tRNA128-LysCTT    | 3.24  | -0.02 | 8.80E-02 | 0.78 |
| mir-5p     | hsa-miR-22-5p          | 3.80  | -0.01 | 8.85E-02 | 0.78 |
| tRNA       | chr14.tRNA2-LeuTAG     | 2.26  | -0.03 | 8.94E-02 | 0.78 |
| scRNA      | BC200-L73              | 2.27  | -0.03 | 8.96E-02 | 0.78 |
| rRNA       | LSU-rRNA_Hsa-L389      | 10.71 | -0.01 | 8.99E-02 | 0.78 |
| tRNA       | chr16.tRNA2-ArgCCT     | 3.09  | -0.02 | 9.15E-02 | 0.78 |
| tRF5       | chr8.tRNA12-TyrGTA-tRF | 2.21  | 0.01  | 9.17E-02 | 0.78 |

|            |                         |       |       |          |      |
|------------|-------------------------|-------|-------|----------|------|
| scRNA      | HY1-L273                | 1.90  | -0.02 | 9.18E-02 | 0.78 |
| scRNA      | BC200-L148              | 2.11  | -0.03 | 9.21E-02 | 0.78 |
| snoRNA     | mgU6-77                 | 4.50  | 0.01  | 9.24E-02 | 0.78 |
| mir-3p     | hsa-miR-92a-3p          | 11.39 | 0.00  | 9.26E-02 | 0.78 |
| mir-5p     | hsa-miR-126-5p          | 6.05  | -0.01 | 9.33E-02 | 0.78 |
| rRNA       | 5S-L500                 | 1.78  | -0.03 | 9.33E-02 | 0.78 |
| scRNA      | HY1-L106                | 1.92  | -0.02 | 9.35E-02 | 0.78 |
| scRNA      | HY1-L321                | 4.61  | -0.01 | 9.46E-02 | 0.78 |
| snoRNA     | U18A                    | 6.81  | 0.01  | 0.10     | 0.78 |
| mir-3p     | hsa-miR-150-3p          | 2.88  | -0.02 | 0.10     | 0.78 |
| mir-5p3pno | hsa-miR-5096            | 2.21  | -0.03 | 0.10     | 0.78 |
| mir-5p     | hsa-miR-185-5p          | 8.24  | -0.01 | 0.10     | 0.78 |
| mir-3p     | hsa-miR-197-3p          | 2.69  | 0.01  | 0.10     | 0.78 |
| snRNA      | U5-L3                   | 2.02  | -0.02 | 0.10     | 0.78 |
| snRNA      | U13_-L44                | 1.56  | -0.05 | 0.10     | 0.78 |
| scRNA      | HY4-L127                | 11.00 | 0.00  | 0.10     | 0.78 |
| mir-5p     | hsa-miR-183-5p          | 7.53  | -0.01 | 0.10     | 0.78 |
| scRNA      | HY1-L304                | 3.88  | -0.01 | 0.10     | 0.78 |
| piRNA      | piR-49144               | 7.05  | -0.01 | 0.10     | 0.78 |
| scRNA      | HY3-L82                 | 3.20  | 0.01  | 0.10     | 0.78 |
| tRNA       | chr6.tRNA133-ValCAC     | 2.93  | -0.02 | 0.10     | 0.78 |
| scRNA      | HY4-L49                 | 1.27  | -0.04 | 0.10     | 0.78 |
| snRNA      | U3-L18                  | 6.00  | 0.01  | 0.10     | 0.78 |
| tRNA       | chr17.tRNA2-LysTTT      | 3.04  | -0.02 | 0.10     | 0.78 |
| scRNA      | HY4-L36                 | 2.19  | -0.03 | 0.10     | 0.78 |
| snoRNA     | U49A                    | 7.52  | 0.01  | 0.10     | 0.79 |
| scRNA      | HY3-L208                | 1.34  | -0.03 | 0.10     | 0.79 |
| scRNA      | BC200-L76               | 2.55  | 0.01  | 0.11     | 0.80 |
| rRNA       | LSU-rRNA_Hsa-L164       | 5.97  | -0.01 | 0.11     | 0.80 |
| tRF3       | chr6.tRNA61-MetCAT-tRF3 | 2.23  | -0.04 | 0.11     | 0.80 |
| mir-5p3pno | hsa-miR-215             | 3.83  | -0.01 | 0.11     | 0.80 |
| mir-5p     | hsa-miR-6723-5p         | 4.58  | -0.01 | 0.11     | 0.80 |
| scRNA      | HY3-L120                | 2.34  | 0.01  | 0.11     | 0.80 |
| mir-5p     | hsa-miR-27a-5p          | 4.98  | 0.01  | 0.11     | 0.81 |
| scRNA      | HY3-L140                | 2.64  | -0.02 | 0.11     | 0.81 |
| piRNA      | piR-36743               | 3.67  | -0.01 | 0.11     | 0.82 |
| snRNA      | U1-L17                  | 1.82  | -0.05 | 0.11     | 0.82 |
| scRNA      | BC200-L31               | 1.42  | -0.04 | 0.11     | 0.82 |
| scRNA      | HY1-L28                 | 1.58  | -0.03 | 0.11     | 0.82 |
| tRF5       | chr1.tRNA104-PseudoGT   | 2.69  | 0.01  | 0.11     | 0.82 |
| tRF3       | chr9.tRNA6-AspGTC-tRF3  | 1.45  | -0.03 | 0.11     | 0.82 |
| tRNA       | chr1.tRNA33-Pseudo???   | 3.32  | -0.02 | 0.12     | 0.83 |
| tRF3       | chr1.tRNA55-LysTTT-tRF3 | 2.49  | -0.03 | 0.12     | 0.83 |

|            |                        |       |       |      |      |
|------------|------------------------|-------|-------|------|------|
| tRNA       | chr17.tRNA20-MetCAT    | 1.87  | -0.03 | 0.12 | 0.83 |
| snoRNA     | U61                    | 5.55  | 0.01  | 0.12 | 0.83 |
| scRNA      | HY3-L524               | 1.56  | -0.03 | 0.12 | 0.83 |
| mir-3p     | hsa-miR-570-3p         | 1.85  | -0.02 | 0.12 | 0.83 |
| mir-5p     | hsa-miR-26a-5p-L2      | 10.75 | 0.00  | 0.12 | 0.83 |
| scRNA      | HY4-L89                | 8.76  | -0.01 | 0.12 | 0.83 |
| mir-3p     | hsa-miR-652-3p         | 3.92  | -0.01 | 0.12 | 0.83 |
| mir-5p     | hsa-miR-20b-5p         | 3.49  | -0.02 | 0.12 | 0.83 |
| rRNA       | 5S-L104                | 10.61 | 0.00  | 0.12 | 0.83 |
| snoRNA     | U31                    | 7.96  | 0.01  | 0.12 | 0.83 |
| snoRNA     | U87                    | 1.65  | -0.04 | 0.12 | 0.83 |
| scRNA      | HY5-L21                | 11.03 | -0.01 | 0.13 | 0.84 |
| tRNA       | chr6.tRNA74-LeuCAA     | 2.43  | -0.02 | 0.13 | 0.85 |
| rRNA       | 5S-L303                | 2.33  | -0.03 | 0.13 | 0.85 |
| mir-5p     | hsa-miR-130b-5p        | 4.40  | -0.01 | 0.13 | 0.85 |
| rRNA       | LSU-rRNA_Hsa-L166      | 5.43  | -0.03 | 0.13 | 0.85 |
| tRF5       | chr4.tRNA3-CysGCA-tRF5 | 1.61  | 0.01  | 0.13 | 0.85 |
| rRNA       | 5S-L61                 | 2.67  | -0.02 | 0.13 | 0.85 |
| tRNA       | chr6.tRNA128-GlyGCC    | 4.35  | -0.01 | 0.13 | 0.85 |
| scRNA      | HY5-L9                 | 1.40  | -0.03 | 0.13 | 0.85 |
| tRNA       | chr2.tRNA11-PseudoTTG  | 6.71  | -0.01 | 0.14 | 0.87 |
| mir-5p     | hsa-let-7i-5p          | 12.19 | 0.00  | 0.14 | 0.87 |
| scRNA      | BC200-L139             | 3.27  | 0.01  | 0.14 | 0.87 |
| scRNA      | BC200-L95              | 3.20  | -0.02 | 0.14 | 0.87 |
| rRNA       | 5S-L97                 | 10.24 | 0.00  | 0.14 | 0.87 |
| scRNA      | HY1-L167               | 2.48  | -0.02 | 0.14 | 0.87 |
| mir-5p3pno | hsa-miR-133a           | 1.55  | 0.01  | 0.14 | 0.87 |
| mir-5p     | hsa-miR-191-5p         | 8.87  | 0.00  | 0.14 | 0.87 |
| mir-5p     | hsa-miR-100-5p         | 6.59  | 0.00  | 0.14 | 0.87 |
| tRNA       | chr17.tRNA17-SupTTA    | 2.90  | -0.01 | 0.14 | 0.87 |
| rRNA       | LSU-rRNA_Hsa-L193      | 7.16  | -0.01 | 0.14 | 0.87 |
| snoRNA     | U101                   | 5.22  | 0.01  | 0.14 | 0.87 |
| rRNA       | LSU-rRNA_Hsa-L266      | 3.17  | -0.02 | 0.14 | 0.87 |
| scRNA      | HY5-L7                 | 2.29  | -0.02 | 0.14 | 0.87 |
| mir-5p     | hsa-miR-3606-5p        | 2.63  | 0.01  | 0.15 | 0.87 |
| scRNA      | HY4-L93                | 3.97  | -0.01 | 0.15 | 0.87 |
| snRNA      | U1-L45                 | 6.78  | -0.01 | 0.15 | 0.87 |
| piRNA      | piR-31935              | 4.57  | -0.01 | 0.15 | 0.87 |
| mir-3p     | hsa-miR-3613-3p        | 1.73  | -0.04 | 0.15 | 0.87 |
| snoRNA     | U48                    | 5.72  | 0.01  | 0.15 | 0.87 |
| piRNA      | piR-34535              | 5.56  | -0.01 | 0.15 | 0.87 |
| snRNA      | U2-L981                | 4.06  | -0.01 | 0.15 | 0.87 |
| tRNA       | chr6.tRNA105-AlaAGC    | 1.66  | -0.03 | 0.15 | 0.87 |

|            |                         |       |       |      |      |
|------------|-------------------------|-------|-------|------|------|
| scRNA      | HY3-L239                | 1.81  | -0.02 | 0.15 | 0.87 |
| mir-3p     | hsa-miR-542-3p          | 3.59  | -0.02 | 0.15 | 0.88 |
| scRNA      | HY1-L10                 | 1.55  | -0.02 | 0.15 | 0.88 |
| rRNA       | LSU-rRNA_Hsa-L39        | 7.57  | -0.01 | 0.15 | 0.88 |
| mir-5p     | hsa-miR-146b-5p         | 7.71  | -0.01 | 0.15 | 0.88 |
| scRNA      | BC200-L69               | 1.43  | -0.03 | 0.15 | 0.88 |
| snRNA      | U2-L1074                | 3.33  | -0.01 | 0.15 | 0.88 |
| mir-3p     | hsa-miR-324-3p          | 1.81  | -0.02 | 0.15 | 0.88 |
| mir-5p     | hsa-miR-30a-5p          | 7.14  | 0.00  | 0.16 | 0.88 |
| snRNA      | U2-L342                 | 5.41  | -0.01 | 0.16 | 0.88 |
| mir-5p3pno | hsa-miR-651             | 3.29  | -0.01 | 0.16 | 0.88 |
| rRNA       | LSU-rRNA_Hsa-L19        | 2.10  | -0.02 | 0.16 | 0.88 |
| mir-5p3pno | hsa-miR-548e            | 2.60  | -0.02 | 0.16 | 0.88 |
| scRNA      | HY3-L279                | 5.21  | -0.01 | 0.16 | 0.88 |
| mir-5p     | hsa-miR-200c-5p         | 2.02  | 0.01  | 0.16 | 0.88 |
| tRF3       | chr16.tRNA31-PseudoTG   | 1.95  | 0.01  | 0.16 | 0.88 |
| rRNA       | LSU-rRNA_Hsa-L185       | 2.41  | 0.01  | 0.16 | 0.88 |
| scRNA      | HY3-L45                 | 3.48  | -0.01 | 0.16 | 0.88 |
| piRNA      | piR-60576-L6            | 8.04  | -0.01 | 0.16 | 0.88 |
| scRNA      | HY3-L142                | 1.70  | -0.03 | 0.16 | 0.89 |
| scRNA      | BC200-L37               | 6.33  | 0.00  | 0.16 | 0.89 |
| scRNA      | HY1-L356                | 4.04  | 0.01  | 0.17 | 0.89 |
| mir-3p     | hsa-miR-4732-3p         | 2.44  | -0.03 | 0.17 | 0.89 |
| mir-3p     | hsa-miR-191-3p          | 1.89  | -0.02 | 0.17 | 0.89 |
| tRNA       | chr17.tRNA12-TrpCCA     | 2.18  | -0.02 | 0.17 | 0.89 |
| tRF5       | chr9.tRNA6-AspGTC-tRF5  | 2.90  | -0.01 | 0.17 | 0.89 |
| tRF5       | chr16.tRNA23-LysTTT-tRF | 3.56  | -0.02 | 0.17 | 0.89 |
| mir-5p3pno | hsa-miR-103b-L2         | 3.90  | -0.01 | 0.17 | 0.89 |
| tRNA       | chr6.tRNA78-LeuAAG      | 2.00  | -0.03 | 0.17 | 0.89 |
| tRNA       | chr2.tRNA1-PseudoCCC    | 5.86  | -0.01 | 0.18 | 0.89 |
| mir-5p     | hsa-miR-3158-5p-L2      | 1.49  | 0.01  | 0.18 | 0.89 |
| snRNA      | U1-L38                  | 1.64  | -0.02 | 0.18 | 0.89 |
| scRNA      | HY4-L162                | 1.65  | -0.02 | 0.18 | 0.89 |
| rRNA       | 5S-L126                 | 2.55  | -0.01 | 0.18 | 0.89 |
| mir-3p     | hsa-miR-3605-3p         | 2.12  | -0.02 | 0.18 | 0.89 |
| piRNA      | piR-31925-L8            | 7.36  | -0.01 | 0.18 | 0.89 |
| scRNA      | HY1-L226                | 3.29  | -0.01 | 0.18 | 0.89 |
| mir-5p     | hsa-miR-192-5p          | 8.24  | 0.00  | 0.18 | 0.89 |
| tRNA       | chr1.tRNA102-PseudoTTG  | 6.55  | 0.00  | 0.18 | 0.89 |
| scRNA      | HY4-L28                 | 6.48  | -0.01 | 0.18 | 0.89 |
| tRNA       | chr1.tRNA81-AspGTC      | 4.35  | -0.01 | 0.18 | 0.89 |
| tRF5       | chr19.tRNA5-LysCTT-tRF5 | 4.33  | -0.01 | 0.18 | 0.89 |
| mir-3p     | hsa-miR-3591-3p         | 12.23 | 0.01  | 0.18 | 0.89 |

|            |                         |       |       |      |      |
|------------|-------------------------|-------|-------|------|------|
| piRNA      | piR-33151-L8            | 4.43  | -0.01 | 0.18 | 0.89 |
| snoRNA     | U76                     | 2.36  | 0.01  | 0.18 | 0.89 |
| mir-5p3pno | hsa-miR-203a            | 2.28  | -0.03 | 0.18 | 0.89 |
| snRNA      | U2-L1058                | 6.70  | -0.01 | 0.18 | 0.89 |
| rRNA       | LSU-rRNA_Hsa-L2         | 9.24  | 0.01  | 0.18 | 0.89 |
| scRNA      | HY4-L16                 | 3.92  | -0.01 | 0.18 | 0.89 |
| rRNA       | 5S-L95                  | 1.71  | -0.02 | 0.18 | 0.89 |
| scRNA      | BC200-L147              | 2.25  | 0.01  | 0.18 | 0.89 |
| rRNA       | LSU-rRNA_Hsa-L381       | 2.74  | -0.02 | 0.18 | 0.89 |
| rRNA       | 5S-L113                 | 10.34 | 0.00  | 0.18 | 0.89 |
| piRNA      | piR-36074               | 4.27  | -0.01 | 0.18 | 0.89 |
| mir-3p     | hsa-miR-23b-3p          | 3.55  | -0.01 | 0.19 | 0.89 |
| piRNA      | piR-31986               | 8.37  | -0.01 | 0.19 | 0.89 |
| piRNA      | piR-35548-L4            | 7.22  | -0.01 | 0.19 | 0.89 |
| scRNA      | HY3-L518                | 8.30  | 0.00  | 0.19 | 0.89 |
| snRNA      | U2-L240                 | 3.38  | 0.01  | 0.19 | 0.89 |
| snRNA      | U1-L24                  | 2.67  | -0.01 | 0.19 | 0.89 |
| snRNA      | U2-L386                 | 2.89  | -0.02 | 0.19 | 0.89 |
| tRF5       | chr5.tRNA22-AspGTC-tRF  | 2.30  | -0.02 | 0.19 | 0.89 |
| tRNA       | chr1.tRNA54-LysTTT      | 8.24  | 0.00  | 0.19 | 0.89 |
| rRNA       | LSU-rRNA_Hsa-L203       | 5.91  | 0.00  | 0.19 | 0.89 |
| rRNA       | LSU-rRNA_Hsa-L139       | 14.15 | 0.00  | 0.19 | 0.89 |
| tRF5       | chr17.tRNA31-AsnGTT-tRF | 2.92  | -0.02 | 0.19 | 0.89 |
| rRNA       | LSU-rRNA_Hsa-L252       | 2.99  | 0.01  | 0.19 | 0.89 |
| mir-5p     | hsa-miR-15a-5p          | 3.78  | -0.01 | 0.20 | 0.89 |
| mir-5p3pno | hsa-miR-1246            | 5.82  | -0.01 | 0.20 | 0.89 |
| mir-5p3pno | hsa-let-7c-L2           | 5.48  | 0.00  | 0.20 | 0.89 |
| mir-5p3pno | hsa-miR-618             | 2.72  | -0.02 | 0.20 | 0.89 |
| rRNA       | LSU-rRNA_Hsa-L48        | 1.64  | -0.02 | 0.20 | 0.89 |
| piRNA      | piR-60565-L12           | 10.99 | 0.00  | 0.20 | 0.89 |
| rRNA       | LSU-rRNA_Hsa-L58        | 7.02  | 0.00  | 0.20 | 0.89 |
| rRNA       | LSU-rRNA_Hsa-L375       | 10.09 | 0.00  | 0.20 | 0.89 |
| piRNA      | piR-41209               | 2.58  | 0.01  | 0.20 | 0.89 |
| snoRNA     | SNORD127                | 4.77  | 0.01  | 0.20 | 0.89 |
| piRNA      | piR-62011               | 8.25  | 0.00  | 0.20 | 0.89 |
| rRNA       | 5S-L194                 | 2.89  | -0.01 | 0.20 | 0.89 |
| rRNA       | LSU-rRNA_Hsa-L124       | 2.33  | -0.02 | 0.20 | 0.89 |
| snRNA      | U1-L39                  | 1.74  | -0.02 | 0.20 | 0.89 |
| snoRNA     | HBII-239                | 4.70  | 0.01  | 0.20 | 0.89 |
| snoRNA     | U80                     | 3.36  | -0.02 | 0.21 | 0.89 |
| tRNA       | chr6.tRNA123-SerGCT     | 2.23  | -0.02 | 0.21 | 0.89 |
| scRNA      | HY1-L439                | 2.44  | -0.01 | 0.21 | 0.89 |
| snRNA      | U2-L166                 | 3.45  | -0.02 | 0.21 | 0.89 |

|            |                       |       |       |      |      |
|------------|-----------------------|-------|-------|------|------|
| piRNA      | piR-33468             | 1.61  | -0.03 | 0.21 | 0.89 |
| rRNA       | SSU-rRNA_Hsa-L26      | 3.24  | -0.01 | 0.21 | 0.89 |
| mir-5p     | hsa-miR-629-5p        | 7.76  | 0.00  | 0.21 | 0.89 |
| tRNA       | chr1.tRNA60-PseudoTAA | 3.73  | -0.01 | 0.21 | 0.89 |
| piRNA      | piR-38502             | 3.33  | -0.01 | 0.21 | 0.89 |
| tRNA       | chr14.tRNA3-ProTGG    | 3.97  | 0.01  | 0.21 | 0.89 |
| scRNA      | HY4-L50               | 1.52  | -0.03 | 0.21 | 0.89 |
| mir-3p     | hsa-miR-486-3p        | 10.93 | 0.00  | 0.21 | 0.89 |
| tRNA       | chr1.tRNA79-GlyTCC    | 1.87  | -0.03 | 0.21 | 0.89 |
| scRNA      | BC200-L159            | 1.51  | -0.03 | 0.21 | 0.89 |
| tRNA       | chr5.tRNA22-AspGTC    | 1.97  | -0.03 | 0.21 | 0.89 |
| scRNA      | HY4-L39               | 3.89  | 0.01  | 0.21 | 0.89 |
| scRNA      | HY1-L324              | 1.92  | 0.01  | 0.22 | 0.89 |
| mir-5p3pno | hsa-miR-6073          | 1.46  | 0.01  | 0.22 | 0.89 |
| tRNA       | chr2.tRNA27-GlyCCC    | 8.80  | -0.01 | 0.22 | 0.89 |
| scRNA      | HY1-L247              | 1.49  | -0.02 | 0.22 | 0.89 |
| snoRNA     | HBI-115               | 2.00  | 0.01  | 0.22 | 0.89 |
| mir-5p     | hsa-miR-382-5p        | 5.88  | -0.01 | 0.22 | 0.89 |
| mir-5p     | hsa-miR-16-5p-L2      | 8.44  | -0.01 | 0.22 | 0.89 |
| snoRNA     | U42A                  | 4.44  | 0.01  | 0.22 | 0.89 |
| tRNA       | chr6.tRNA100-LeuCAA   | 3.49  | -0.01 | 0.22 | 0.89 |
| tRNA       | chr6.tRNA66-AlaTGC    | 1.95  | -0.02 | 0.22 | 0.89 |
| rRNA       | LSU-rRNA_Hsa-L309     | 8.19  | 0.00  | 0.22 | 0.89 |
| mir-5p     | hsa-miR-92b-5p        | 2.28  | -0.01 | 0.22 | 0.89 |
| tRNA       | chr1.tRNA2-GlyCCC     | 5.38  | -0.01 | 0.22 | 0.89 |
| snoRNA     | U55                   | 5.84  | 0.01  | 0.22 | 0.89 |
| scRNA      | HY1-L137              | 4.44  | 0.00  | 0.22 | 0.89 |
| rRNA       | LSU-rRNA_Hsa-L67      | 3.16  | -0.01 | 0.22 | 0.89 |
| tRNA       | chr6.tRNA166-AlaAGC   | 1.77  | -0.02 | 0.23 | 0.89 |
| tRNA       | chr6.tRNA129-MetCAT   | 5.33  | -0.01 | 0.23 | 0.89 |
| rRNA       | 5S-L101               | 9.06  | 0.00  | 0.23 | 0.89 |
| rRNA       | SSU-rRNA_Hsa-L24      | 9.30  | 0.00  | 0.23 | 0.89 |
| scRNA      | HY1-L300              | 2.19  | -0.01 | 0.23 | 0.89 |
| mir-5p     | hsa-miR-1307-5p       | 1.42  | -0.03 | 0.23 | 0.89 |
| snoRNA     | HBII-420              | 4.25  | 0.01  | 0.23 | 0.89 |
| piRNA      | piR-33082             | 7.18  | 0.00  | 0.23 | 0.89 |
| mir-3p     | hsa-miR-130b-3p       | 2.46  | -0.01 | 0.23 | 0.89 |
| rRNA       | 5S-L829               | 2.65  | -0.01 | 0.23 | 0.89 |
| scRNA      | HY4-L129              | 3.45  | -0.01 | 0.23 | 0.89 |
| mir-5p     | hsa-miR-342-5p        | 6.55  | 0.00  | 0.23 | 0.89 |
| scRNA      | BC200-L129            | 2.19  | 0.01  | 0.23 | 0.89 |
| mir-5p     | hsa-miR-450a-5p       | 3.31  | 0.01  | 0.23 | 0.89 |
| mir-3p     | hsa-miR-382-3p        | 2.29  | 0.01  | 0.23 | 0.89 |

|            |                     |       |       |      |      |
|------------|---------------------|-------|-------|------|------|
| scRNA      | HY1-L124            | 1.84  | -0.02 | 0.23 | 0.89 |
| piRNA      | piR-33382           | 8.69  | -0.01 | 0.23 | 0.89 |
| scRNA      | HY4-L100            | 3.24  | -0.01 | 0.23 | 0.89 |
| piRNA      | piR-43325-L2        | 2.34  | -0.02 | 0.23 | 0.89 |
| scRNA      | BC200-L120          | 1.92  | 0.01  | 0.23 | 0.89 |
| mir-3p     | hsa-miR-409-3p      | 5.71  | -0.01 | 0.23 | 0.89 |
| tRNA       | chr14.tRNA19-TyrGTA | 2.52  | -0.02 | 0.23 | 0.89 |
| scRNA      | BC200-L100          | 1.69  | -0.03 | 0.24 | 0.89 |
| piRNA      | piR-33151-L12       | 2.94  | -0.01 | 0.24 | 0.89 |
| scRNA      | HY4-L41             | 1.86  | -0.02 | 0.24 | 0.89 |
| mir-3p     | hsa-miR-29a-3p      | 5.96  | 0.00  | 0.24 | 0.89 |
| scRNA      | HY1-L3              | 3.10  | -0.01 | 0.24 | 0.89 |
| scRNA      | HY4-L69             | 9.89  | 0.00  | 0.24 | 0.89 |
| rRNA       | SSU-rRNA_Hsa-L74    | 6.51  | 0.00  | 0.24 | 0.89 |
| tRNA       | chr6.tRNA84-GlnTTG  | 1.52  | -0.02 | 0.24 | 0.89 |
| rRNA       | SSU-rRNA_Hsa-L3     | 1.28  | -0.02 | 0.24 | 0.89 |
| scRNA      | HY3-L497            | 2.14  | -0.01 | 0.24 | 0.89 |
| mir-3p     | hsa-miR-139-3p      | 3.31  | -0.01 | 0.24 | 0.89 |
| rRNA       | 5S-L1075            | 3.11  | -0.01 | 0.24 | 0.89 |
| tRNA       | chr1.tRNA15-GlnCTG  | 2.98  | -0.01 | 0.24 | 0.89 |
| mir-3p     | hsa-miR-24-3p       | 8.44  | 0.00  | 0.24 | 0.89 |
| rRNA       | LSU-rRNA_Hsa-L198   | 7.74  | 0.00  | 0.25 | 0.89 |
| snRNA      | U2-L1001            | 2.25  | -0.01 | 0.25 | 0.89 |
| piRNA      | piR-47305           | 9.66  | 0.00  | 0.25 | 0.89 |
| mir-5p     | hsa-miR-574-5p      | 4.85  | 0.00  | 0.25 | 0.89 |
| mir-3p     | hsa-miR-21-3p       | 1.95  | -0.02 | 0.25 | 0.89 |
| mir-5p     | hsa-miR-330-5p      | 1.63  | -0.02 | 0.25 | 0.89 |
| mir-3p     | hsa-miR-330-3p      | 3.77  | -0.01 | 0.25 | 0.89 |
| mir-5p     | hsa-miR-150-5p      | 5.10  | -0.01 | 0.25 | 0.89 |
| scRNA      | HY1-L37             | 6.31  | 0.00  | 0.25 | 0.89 |
| mir-5p3pno | hsa-miR-95          | 2.72  | -0.01 | 0.25 | 0.89 |
| tRNA       | chr19.tRNA8-SeCTCA  | 5.86  | 0.00  | 0.25 | 0.89 |
| rRNA       | 5S-L1144            | 1.38  | -0.02 | 0.25 | 0.89 |
| snoRNA     | U59A                | 6.70  | 0.01  | 0.25 | 0.89 |
| piRNA      | piR-35411-L4        | 2.53  | 0.01  | 0.25 | 0.89 |
| scRNA      | HY1-L418            | 1.64  | -0.02 | 0.25 | 0.89 |
| piRNA      | piR-41209-L2        | 3.72  | -0.01 | 0.26 | 0.89 |
| mir-5p3pno | hsa-miR-598         | 1.77  | -0.02 | 0.26 | 0.89 |
| mir-5p     | hsa-miR-486-5p      | 13.44 | 0.00  | 0.26 | 0.89 |
| scRNA      | HY1-L419            | 3.95  | -0.01 | 0.26 | 0.89 |
| piRNA      | piR-36323-L3        | 2.88  | -0.01 | 0.26 | 0.89 |
| mir-5p3pno | hsa-miR-378g        | 2.04  | 0.01  | 0.26 | 0.89 |
| mir-5p     | hsa-miR-3613-5p     | 4.64  | 0.00  | 0.26 | 0.89 |

|            |                        |       |       |      |      |
|------------|------------------------|-------|-------|------|------|
| snoRNA     | U74                    | 5.78  | -0.01 | 0.26 | 0.89 |
| rRNA       | 5S-L356                | 5.32  | -0.01 | 0.26 | 0.89 |
| rRNA       | 5S-L688                | 4.43  | 0.00  | 0.26 | 0.89 |
| tRNA       | chr17.tRNA18-ArgCCT    | 1.72  | 0.01  | 0.26 | 0.89 |
| tRNA       | chr1.tRNA131-GlyCCC    | 7.00  | -0.01 | 0.26 | 0.89 |
| scRNA      | BC200-L10              | 2.65  | -0.02 | 0.26 | 0.89 |
| mir-3p     | hsa-miR-103a-3p-L2     | 3.33  | -0.01 | 0.26 | 0.89 |
| snoRNA     | U94                    | 3.12  | 0.01  | 0.26 | 0.89 |
| rRNA       | 5S-L627                | 1.59  | -0.02 | 0.26 | 0.89 |
| rRNA       | 5S-L1217               | 1.70  | -0.02 | 0.26 | 0.90 |
| mir-5p     | hsa-miR-584-5p         | 7.31  | 0.00  | 0.27 | 0.90 |
| scRNA      | HY4-L142               | 3.10  | 0.01  | 0.27 | 0.90 |
| rRNA       | LSU-rRNA_Hsa-L42       | 1.88  | -0.01 | 0.27 | 0.90 |
| rRNA       | LSU-rRNA_Hsa-L13       | 12.04 | 0.00  | 0.27 | 0.90 |
| snoRNA     | U83A                   | 3.52  | -0.01 | 0.27 | 0.90 |
| tRNA       | chr17.tRNA41-SerCGA    | 2.38  | 0.02  | 0.27 | 0.90 |
| mir-3p     | hsa-miR-500a-3p        | 3.32  | -0.01 | 0.27 | 0.90 |
| scRNA      | HY3-L272               | 1.38  | -0.02 | 0.27 | 0.90 |
| piRNA      | piR-38354              | 2.15  | -0.01 | 0.27 | 0.90 |
| tRF3       | chr20.tRNA4-PseudoTAA  | 4.75  | -0.01 | 0.27 | 0.90 |
| tRNA       | chr1.tRNA110-PseudoTTC | 1.44  | -0.02 | 0.27 | 0.90 |
| rRNA       | SSU-rRNA_Hsa-L80       | 6.73  | 0.00  | 0.27 | 0.90 |
| rRNA       | 5S-L191                | 4.70  | -0.01 | 0.27 | 0.90 |
| rRNA       | LSU-rRNA_Hsa-L378      | 2.46  | -0.02 | 0.27 | 0.90 |
| mir-5p3pno | hsa-miR-1284           | 1.70  | -0.02 | 0.27 | 0.90 |
| rRNA       | LSU-rRNA_Hsa-L403      | 9.95  | 0.00  | 0.27 | 0.90 |
| rRNA       | 5S-L99                 | 8.58  | 0.00  | 0.27 | 0.90 |
| mir-5p3pno | hsa-miR-378c           | 5.35  | -0.01 | 0.28 | 0.90 |
| snoRNA     | U36A                   | 1.72  | 0.02  | 0.28 | 0.90 |
| snoRNA     | U33                    | 4.23  | 0.01  | 0.28 | 0.90 |
| rRNA       | 5S-L930                | 1.75  | 0.01  | 0.28 | 0.90 |
| tRNA       | chr17.tRNA31-AsnGTT    | 2.61  | -0.01 | 0.28 | 0.90 |
| scRNA      | HY4-L61                | 5.54  | 0.00  | 0.28 | 0.90 |
| rRNA       | LSU-rRNA_Hsa-L283      | 2.10  | -0.02 | 0.28 | 0.90 |
| rRNA       | LSU-rRNA_Hsa-L130      | 4.63  | -0.01 | 0.28 | 0.90 |
| scRNA      | HY1-L103               | 2.46  | -0.01 | 0.28 | 0.90 |
| rRNA       | LSU-rRNA_Hsa-L384      | 14.09 | 0.00  | 0.28 | 0.90 |
| scRNA      | HY5                    | 1.57  | -0.02 | 0.28 | 0.90 |
| tRF5       | chr6.tRNA130-GlnTTG-tR | 1.89  | -0.02 | 0.28 | 0.90 |
| rRNA       | LSU-rRNA_Hsa-L308      | 1.76  | -0.02 | 0.28 | 0.90 |
| snoRNA     | U73a                   | 1.79  | -0.02 | 0.28 | 0.90 |
| scRNA      | HY4-L152               | 7.32  | 0.00  | 0.28 | 0.90 |
| piRNA      | piR-36376              | 2.64  | -0.01 | 0.28 | 0.90 |



|            |                       |       |       |      |      |
|------------|-----------------------|-------|-------|------|------|
| rRNA       | 5S-L112               | 10.83 | 0.00  | 0.29 | 0.90 |
| tRNA       | chr1.tRNA119-LysCTT   | 7.12  | 0.00  | 0.29 | 0.90 |
| rRNA       | 5S-L586               | 2.14  | -0.01 | 0.29 | 0.90 |
| scRNA      | HY4-L56               | 1.82  | -0.01 | 0.29 | 0.90 |
| snoRNA     | ACA34                 | 4.14  | 0.01  | 0.29 | 0.90 |
| tRNA       | chr6.tRNA37-ValAAC    | 9.05  | 0.00  | 0.29 | 0.90 |
| scRNA      | BC200-L156            | 2.60  | 0.01  | 0.29 | 0.90 |
| mir-3p     | hsa-miR-25-3p         | 12.18 | 0.00  | 0.29 | 0.90 |
| piRNA      | piR-61648-L7          | 4.08  | -0.01 | 0.29 | 0.90 |
| rRNA       | 5S-L1196              | 2.22  | -0.01 | 0.29 | 0.90 |
| rRNA       | LSU-rRNA_Hsa-L365     | 1.60  | -0.02 | 0.29 | 0.90 |
| mir-3p     | hsa-miR-29b-3p        | 2.25  | -0.01 | 0.29 | 0.90 |
| scRNA      | HY3-L512              | 2.05  | -0.02 | 0.29 | 0.90 |
| piRNA      | piR-60565-L4          | 12.26 | 0.00  | 0.29 | 0.91 |
| mir-3p     | hsa-miR-10b-3p        | 1.70  | 0.01  | 0.29 | 0.91 |
| scRNA      | HY1-L279              | 4.02  | 0.00  | 0.30 | 0.91 |
| scRNA      | HY4-L68               | 4.03  | -0.01 | 0.30 | 0.91 |
| snRNA      | U5-L22                | 1.98  | -0.02 | 0.30 | 0.91 |
| snoRNA     | U51                   | 2.71  | -0.02 | 0.30 | 0.91 |
| mir-3p     | hsa-miR-125a-3p       | 3.83  | 0.01  | 0.30 | 0.91 |
| scRNA      | HY1-L397              | 3.27  | -0.01 | 0.30 | 0.91 |
| mir-5p3pno | hsa-miR-433           | 3.46  | -0.01 | 0.30 | 0.91 |
| scRNA      | BC200-L68             | 2.33  | -0.02 | 0.30 | 0.91 |
| rRNA       | LSU-rRNA_Hsa-L208     | 7.16  | 0.00  | 0.30 | 0.91 |
| tRNA       | chr1.tRNA117-GlyTCC   | 2.71  | -0.01 | 0.30 | 0.91 |
| tRNA       | chr2.tRNA14-TyrATA    | 3.30  | -0.01 | 0.30 | 0.91 |
| scRNA      | BC200-L29             | 2.92  | -0.01 | 0.30 | 0.91 |
| scRNA      | HY4-L57               | 2.80  | 0.00  | 0.30 | 0.91 |
| scRNA      | BC200-L128            | 2.65  | -0.01 | 0.31 | 0.91 |
| scRNA      | HY4-L116              | 3.88  | 0.00  | 0.31 | 0.91 |
| piRNA      | piR-60577-L3          | 7.08  | 0.00  | 0.31 | 0.91 |
| tRNA       | chr14.tRNA4-ThrTGT    | 1.44  | -0.02 | 0.31 | 0.91 |
| tRNA       | chr17.tRNA10-GlyTCC   | 1.81  | -0.02 | 0.31 | 0.91 |
| piRNA      | piR-30112             | 2.68  | -0.02 | 0.31 | 0.91 |
| scRNA      | BC200-L126            | 3.33  | 0.00  | 0.31 | 0.91 |
| tRNA       | chr2.tRNA25-PseudoCTC | 8.69  | 0.00  | 0.31 | 0.91 |
| rRNA       | LSU-rRNA_Hsa-L387     | 9.35  | 0.00  | 0.31 | 0.91 |
| scRNA      | HY1-L192              | 5.99  | 0.00  | 0.31 | 0.92 |
| mir-5p     | hsa-miR-28-5p         | 5.11  | 0.00  | 0.31 | 0.92 |
| mir-3p     | hsa-miR-15b-3p        | 3.61  | -0.01 | 0.31 | 0.92 |
| rRNA       | 5S-L1067              | 2.57  | -0.01 | 0.31 | 0.92 |
| piRNA      | piR-35548-L3          | 2.78  | -0.01 | 0.31 | 0.92 |
| scRNA      | HY1-L277              | 3.60  | 0.00  | 0.32 | 0.92 |

|            |                        |       |       |      |      |
|------------|------------------------|-------|-------|------|------|
| scRNA      | HY4-L58                | 3.81  | -0.01 | 0.32 | 0.92 |
| tRNA       | chr13.tRNA5-GluTTC     | 8.98  | 0.00  | 0.32 | 0.92 |
| rRNA       | 5S-L98                 | 9.83  | 0.00  | 0.32 | 0.92 |
| tRF3       | chr3.tRNA2-ValAAC-tRF3 | 4.15  | 0.01  | 0.32 | 0.92 |
| mir-3p     | hsa-miR-548o-3p-L2     | 3.14  | 0.01  | 0.32 | 0.92 |
| mir-5p     | hsa-miR-93-5p          | 7.11  | 0.00  | 0.32 | 0.92 |
| scRNA      | HY4-L35                | 7.15  | 0.00  | 0.32 | 0.92 |
| tRNA       | chr14.tRNA12-PseudoTT  | 1.56  | -0.02 | 0.32 | 0.92 |
| mir-5p     | hsa-miR-340-5p         | 6.42  | 0.00  | 0.32 | 0.92 |
| rRNA       | LSU-rRNA_Hsa-L221      | 2.74  | -0.01 | 0.33 | 0.92 |
| mir-3p     | hsa-miR-19b-3p         | 4.04  | -0.01 | 0.33 | 0.92 |
| mir-5p     | hsa-miR-338-5p         | 4.39  | -0.01 | 0.33 | 0.92 |
| mir-3p     | hsa-miR-625-3p         | 4.68  | 0.00  | 0.33 | 0.92 |
| scRNA      | HY4-L107               | 9.96  | 0.00  | 0.33 | 0.92 |
| scRNA      | BC200-L8               | 2.74  | -0.01 | 0.33 | 0.92 |
| piRNA      | piR-50811              | 3.42  | 0.00  | 0.33 | 0.92 |
| mir-5p     | hsa-miR-30c-5p         | 6.46  | 0.00  | 0.33 | 0.92 |
| rRNA       | 5S-L344                | 2.37  | -0.01 | 0.33 | 0.92 |
| snoRNA     | HBII-316               | 2.02  | 0.01  | 0.33 | 0.92 |
| rRNA       | 5S-L107                | 10.07 | 0.00  | 0.33 | 0.92 |
| scRNA      | HY4-L6                 | 3.98  | -0.01 | 0.33 | 0.92 |
| snoRNA     | U106                   | 1.86  | 0.01  | 0.33 | 0.92 |
| snRNA      | U2-L887                | 6.32  | 0.00  | 0.33 | 0.92 |
| tRNA       | chr9.tRNA4-ArgTCT      | 1.63  | -0.02 | 0.33 | 0.92 |
| piRNA      | piR-61174              | 1.23  | -0.02 | 0.34 | 0.92 |
| snoRNA     | ACA53                  | 3.01  | -0.02 | 0.34 | 0.92 |
| rRNA       | 5S-L1129               | 1.90  | 0.01  | 0.34 | 0.92 |
| scRNA      | BC200-L60              | 2.38  | 0.01  | 0.34 | 0.92 |
| scRNA      | HY1-L260               | 4.88  | 0.00  | 0.34 | 0.92 |
| rRNA       | SSU-rRNA_Hsa-L46       | 6.10  | -0.01 | 0.34 | 0.92 |
| piRNA      | piR-31038              | 9.22  | 0.00  | 0.34 | 0.92 |
| rRNA       | LSU-rRNA_Hsa-L295      | 3.46  | 0.00  | 0.34 | 0.92 |
| mir-5p3pno | hsa-miR-548j           | 1.80  | -0.02 | 0.34 | 0.92 |
| scRNA      | BC200-L23              | 3.06  | 0.01  | 0.34 | 0.92 |
| scRNA      | HY4-L37                | 4.00  | -0.01 | 0.34 | 0.92 |
| snRNA      | U3-L78                 | 4.40  | 0.00  | 0.34 | 0.92 |
| mir-3p     | hsa-miR-142-3p         | 5.68  | 0.00  | 0.34 | 0.92 |
| mir-5p     | hsa-miR-1234-5p        | 14.77 | 0.00  | 0.34 | 0.92 |
| rRNA       | 5S-L819                | 2.01  | -0.01 | 0.35 | 0.92 |
| rRNA       | LSU-rRNA_Hsa-L165      | 7.53  | 0.00  | 0.35 | 0.92 |
| scRNA      | HY4-L52                | 2.37  | -0.01 | 0.35 | 0.92 |
| piRNA      | piR-53129              | 1.55  | -0.02 | 0.35 | 0.92 |
| mir-3p     | hsa-miR-3177-3p        | 1.68  | -0.01 | 0.35 | 0.92 |

|            |                       |       |       |      |      |
|------------|-----------------------|-------|-------|------|------|
| snoRNA     | U27                   | 4.90  | -0.01 | 0.35 | 0.92 |
| mir-3p     | hsa-let-7f-2-3p       | 1.55  | 0.01  | 0.35 | 0.92 |
| tRNA       | chr1.tRNA88-PseudoCCT | 6.19  | -0.01 | 0.35 | 0.92 |
| mir-5p     | hsa-miR-374a-5p       | 2.91  | -0.01 | 0.35 | 0.92 |
| rRNA       | LSU-rRNA_Hsa-L43      | 1.53  | -0.01 | 0.35 | 0.92 |
| rRNA       | 5S-L78                | 2.70  | -0.01 | 0.35 | 0.92 |
| scRNA      | BC200-L101            | 1.85  | -0.02 | 0.35 | 0.92 |
| mir-3p     | hsa-miR-450a-3p       | 1.53  | 0.01  | 0.35 | 0.92 |
| piRNA      | piR-33082-L2          | 1.78  | -0.02 | 0.35 | 0.92 |
| snRNA      | U2-L550               | 2.12  | -0.01 | 0.35 | 0.92 |
| tRF3       | chr7.tRNA26-PseudoTTG | 2.24  | -0.01 | 0.35 | 0.92 |
| snoRNA     | ACA9                  | 1.70  | -0.02 | 0.35 | 0.92 |
| tRNA       | chr1.tRNA85-ValCAC    | 3.44  | -0.01 | 0.35 | 0.92 |
| snRNA      | U6-L9                 | 4.67  | 0.00  | 0.35 | 0.92 |
| scRNA      | HY4-L146              | 1.61  | -0.02 | 0.36 | 0.92 |
| tRNA       | chr6.tRNA87-GluCTC    | 15.82 | 0.00  | 0.36 | 0.92 |
| scRNA      | HY4-L46               | 9.09  | 0.00  | 0.36 | 0.92 |
| mir-5p3pno | hsa-miR-320b          | 4.99  | 0.00  | 0.36 | 0.92 |
| scRNA      | HY4-L70               | 9.07  | 0.00  | 0.36 | 0.92 |
| mir-3p     | hsa-miR-181a-3p       | 2.62  | 0.01  | 0.36 | 0.92 |
| snRNA      | U5-L2                 | 6.33  | 0.00  | 0.36 | 0.92 |
| rRNA       | LSU-rRNA_Hsa-L297     | 1.90  | -0.02 | 0.36 | 0.92 |
| scRNA      | HY3-L196              | 1.85  | -0.01 | 0.36 | 0.92 |
| mir-3p     | hsa-miR-1285-3p       | 3.54  | -0.01 | 0.36 | 0.92 |
| rRNA       | LSU-rRNA_Hsa-L144     | 1.61  | 0.01  | 0.36 | 0.92 |
| snRNA      | U1-L43                | 1.93  | -0.01 | 0.36 | 0.92 |
| scRNA      | HY3-L35               | 2.20  | -0.01 | 0.36 | 0.92 |
| tRNA       | chr6.tRNA152-ValCAC   | 8.52  | 0.00  | 0.36 | 0.92 |
| scRNA      | HY1-L178              | 4.26  | -0.01 | 0.36 | 0.92 |
| piRNA      | piR-44716             | 4.74  | -0.04 | 0.36 | 0.92 |
| rRNA       | LSU-rRNA_Hsa-L348     | 1.92  | -0.02 | 0.36 | 0.92 |
| rRNA       | LSU-rRNA_Hsa-L323     | 8.20  | 0.00  | 0.36 | 0.92 |
| tRNA       | chr1.tRNA58-LeuCAA    | 3.40  | 0.00  | 0.37 | 0.92 |
| scRNA      | HY4-L66               | 7.15  | 0.00  | 0.37 | 0.92 |
| tRNA       | chr1.tRNA64-GluTTC    | 7.89  | 0.00  | 0.37 | 0.92 |
| mir-5p     | hsa-miR-550a-5p-L2    | 3.39  | -0.01 | 0.37 | 0.92 |
| tRNA       | chr1.tRNA134-GluTTC   | 7.45  | 0.00  | 0.37 | 0.92 |
| scRNA      | HY3-L177              | 1.55  | -0.01 | 0.37 | 0.92 |
| rRNA       | 5S-L111               | 10.31 | 0.00  | 0.37 | 0.92 |
| snoRNA     | HBI-61                | 3.49  | -0.01 | 0.37 | 0.92 |
| scRNA      | HY4-L30               | 3.53  | 0.00  | 0.37 | 0.92 |
| tRNA       | chr16.tRNA34-GlyCCC   | 4.00  | -0.01 | 0.37 | 0.92 |
| snoRNA     | U83                   | 2.97  | 0.01  | 0.37 | 0.92 |

|            |                     |       |       |      |      |
|------------|---------------------|-------|-------|------|------|
| mir-5p3pno | hsa-miR-487b        | 1.50  | 0.01  | 0.37 | 0.92 |
| scRNA      | HY1-L261            | 1.76  | -0.02 | 0.37 | 0.92 |
| mir-5p     | hsa-miR-4787-5p     | 1.33  | -0.02 | 0.37 | 0.92 |
| tRNA       | chr1.tRNA52-ProCGG  | 2.13  | -0.01 | 0.37 | 0.92 |
| mir-5p     | hsa-miR-32-5p       | 3.62  | 0.00  | 0.37 | 0.92 |
| mir-5p3pno | hsa-miR-152         | 5.59  | 0.00  | 0.37 | 0.92 |
| rRNA       | LSU-rRNA_Hsa-L304   | 2.50  | -0.01 | 0.37 | 0.92 |
| snoRNA     | ACA21               | 2.76  | 0.01  | 0.38 | 0.92 |
| snRNA      | U1-L11              | 3.90  | -0.01 | 0.38 | 0.92 |
| mir-3p     | hsa-miR-628-3p      | 3.76  | -0.01 | 0.38 | 0.92 |
| rRNA       | 5S-L935             | 2.94  | -0.01 | 0.38 | 0.92 |
| scRNA      | HY4-L32             | 3.65  | -0.01 | 0.38 | 0.92 |
| piRNA      | piR-31068-L3        | 3.12  | -0.01 | 0.38 | 0.92 |
| tRNA       | chr5.tRNA4-ValAAC   | 2.29  | 0.01  | 0.38 | 0.92 |
| mir-3p     | hsa-miR-145-3p      | 4.84  | 0.00  | 0.38 | 0.92 |
| rRNA       | LSU-rRNA_Hsa-L230   | 3.37  | 0.00  | 0.38 | 0.92 |
| snRNA      | U2-L537             | 2.76  | -0.01 | 0.38 | 0.92 |
| rRNA       | 5S-L1070            | 1.47  | -0.01 | 0.38 | 0.92 |
| snRNA      | U6-L1561            | 2.12  | -0.02 | 0.38 | 0.92 |
| rRNA       | LSU-rRNA_Hsa-L382   | 13.70 | 0.00  | 0.38 | 0.92 |
| snRNA      | U2-L63              | 2.16  | -0.01 | 0.39 | 0.92 |
| scRNA      | HY3-L478            | 8.12  | 0.00  | 0.39 | 0.92 |
| mir-5p     | hsa-miR-4433-5p     | 5.15  | 0.00  | 0.39 | 0.92 |
| snoRNA     | mgh28S-2411         | 6.56  | 0.00  | 0.39 | 0.92 |
| mir-5p     | hsa-miR-1228-5p     | 2.00  | -0.01 | 0.39 | 0.92 |
| rRNA       | LSU-rRNA_Hsa-L350   | 10.47 | 0.00  | 0.39 | 0.92 |
| rRNA       | LSU-rRNA_Hsa-L31    | 7.70  | 0.00  | 0.39 | 0.92 |
| scRNA      | HY4-L109            | 2.11  | 0.01  | 0.39 | 0.92 |
| mir-5p3pno | hsa-miR-548k        | 1.89  | -0.01 | 0.39 | 0.92 |
| rRNA       | LSU-rRNA_Hsa-L214   | 2.13  | 0.01  | 0.39 | 0.92 |
| scRNA      | BC200-L16           | 1.59  | -0.02 | 0.39 | 0.92 |
| rRNA       | 5S-L746             | 2.21  | 0.00  | 0.39 | 0.92 |
| snoRNA     | E3                  | 2.66  | 0.01  | 0.39 | 0.92 |
| scRNA      | BC200-L151          | 2.08  | 0.01  | 0.39 | 0.92 |
| rRNA       | 5S-L1091            | 1.37  | -0.02 | 0.39 | 0.92 |
| scRNA      | BC200-L90           | 2.60  | -0.01 | 0.39 | 0.92 |
| mir-3p     | hsa-miR-101-3p      | 10.61 | 0.00  | 0.39 | 0.92 |
| mir-5p     | hsa-miR-106a-5p     | 2.83  | -0.01 | 0.40 | 0.92 |
| mir-3p     | hsa-let-7f-1-3p     | 1.61  | 0.01  | 0.40 | 0.92 |
| snoRNA     | U57                 | 4.69  | 0.00  | 0.40 | 0.92 |
| piRNA      | piR-36494           | 2.00  | -0.02 | 0.40 | 0.92 |
| mir-3p     | hsa-miR-495-3p      | 2.88  | -0.01 | 0.40 | 0.92 |
| tRNA       | chr14.tRNA10-IleAAT | 1.41  | 0.01  | 0.40 | 0.92 |

|            |                    |       |       |      |      |
|------------|--------------------|-------|-------|------|------|
| scRNA      | HY5-L19            | 2.11  | -0.01 | 0.40 | 0.92 |
| rRNA       | LSU-rRNA_Hsa-L202  | 3.79  | 0.00  | 0.40 | 0.92 |
| piRNA      | piR-43325-L7       | 3.82  | -0.01 | 0.40 | 0.92 |
| snRNA      | U2-L1061           | 11.07 | 0.00  | 0.40 | 0.92 |
| rRNA       | LSU-rRNA_Hsa-L212  | 3.25  | -0.01 | 0.40 | 0.92 |
| rRNA       | LSU-rRNA_Hsa-L360  | 1.84  | -0.01 | 0.40 | 0.92 |
| mir-3p     | hsa-miR-381-3p     | 4.43  | -0.01 | 0.40 | 0.92 |
| snRNA      | U17                | 1.81  | -0.01 | 0.40 | 0.92 |
| snoRNA     | U59B               | 7.06  | 0.01  | 0.41 | 0.92 |
| rRNA       | 5S-L489            | 5.18  | -0.01 | 0.41 | 0.92 |
| scRNA      | HY4-L10            | 10.20 | 0.00  | 0.41 | 0.92 |
| mir-5p3pno | hsa-miR-4473       | 1.40  | -0.01 | 0.41 | 0.92 |
| rRNA       | 5S-L108            | 11.53 | 0.00  | 0.41 | 0.92 |
| tRNA       | chr6.tRNA63-IleTAT | 1.53  | -0.02 | 0.41 | 0.92 |
| tRNA       | chr7.tRNA3-ArgCCT  | 5.38  | 0.00  | 0.41 | 0.92 |
| scRNA      | HY3-L359           | 1.91  | -0.02 | 0.41 | 0.92 |
| mir-5p     | hsa-miR-409-5p     | 1.55  | 0.01  | 0.41 | 0.92 |
| scRNA      | BC200-L146         | 2.61  | -0.01 | 0.41 | 0.92 |
| piRNA      | piR-51119          | 2.10  | -0.01 | 0.41 | 0.92 |
| mir-5p     | hsa-miR-139-5p     | 6.03  | 0.00  | 0.41 | 0.92 |
| scRNA      | BC200-L140         | 7.01  | 0.00  | 0.41 | 0.92 |
| snoRNA     | ACA16              | 2.80  | -0.01 | 0.41 | 0.92 |
| scRNA      | HY4-L12            | 5.27  | 0.00  | 0.41 | 0.92 |
| mir-5p     | hsa-miR-10b-5p     | 10.26 | 0.00  | 0.41 | 0.92 |
| scRNA      | HY4-L120           | 9.92  | 0.00  | 0.41 | 0.92 |
| rRNA       | SSU-rRNA_Hsa-L16   | 6.78  | 0.00  | 0.41 | 0.92 |
| mir-5p3pno | hsa-miR-1287       | 1.87  | -0.01 | 0.41 | 0.92 |
| tRNA       | chr13.tRNA3-GluTTC | 10.17 | 0.00  | 0.41 | 0.92 |
| scRNA      | BC200-L62          | 2.72  | -0.01 | 0.42 | 0.92 |
| snRNA      | U2-L288            | 2.57  | -0.01 | 0.42 | 0.92 |
| tRNA       | chr6.tRNA30-ProCGG | 10.88 | 0.00  | 0.42 | 0.92 |
| snoRNA     | HBII-135           | 5.06  | 0.01  | 0.42 | 0.92 |
| tRNA       | chr7.tRNA7-CysGCA  | 7.06  | 0.00  | 0.42 | 0.92 |
| snRNA      | U2-L75             | 4.87  | -0.01 | 0.42 | 0.92 |
| mir-3p     | hsa-miR-26b-3p     | 2.34  | -0.01 | 0.42 | 0.92 |
| mir-3p     | hsa-miR-22-3p      | 10.18 | 0.00  | 0.42 | 0.92 |
| scRNA      | HY5-L8             | 3.89  | -0.01 | 0.42 | 0.92 |
| scRNA      | BC200-L108         | 2.02  | 0.01  | 0.42 | 0.92 |
| scRNA      | HY1-L342           | 1.37  | -0.01 | 0.42 | 0.92 |
| tRNA       | chr5.tRNA6-ValCAC  | 10.69 | 0.00  | 0.42 | 0.92 |
| snoRNA     | U25                | 5.19  | -0.01 | 0.42 | 0.92 |
| snRNA      | U1-L63             | 2.53  | -0.01 | 0.43 | 0.92 |
| rRNA       | 5S-L1009           | 2.50  | -0.01 | 0.43 | 0.92 |

|            |                        |      |       |      |      |
|------------|------------------------|------|-------|------|------|
| scRNA      | HY4-L159               | 4.46 | 0.00  | 0.43 | 0.92 |
| snRNA      | U1-L7                  | 6.15 | 0.00  | 0.43 | 0.92 |
| tRF5       | chr1.tRNA90-ValCAC-tRF | 2.14 | 0.01  | 0.43 | 0.92 |
| mir-5p3pno | hsa-miR-1976           | 1.89 | -0.01 | 0.43 | 0.92 |
| mir-5p     | hsa-miR-24-2-5p        | 4.12 | 0.00  | 0.43 | 0.92 |
| scRNA      | BC200-L54              | 4.73 | -0.01 | 0.43 | 0.92 |
| snoRNA     | HBII-180A              | 2.03 | 0.01  | 0.43 | 0.92 |
| scRNA      | HY1-L239               | 4.37 | 0.00  | 0.43 | 0.92 |
| scRNA      | BC200-L32              | 2.06 | 0.01  | 0.43 | 0.92 |
| mir-5p     | hsa-miR-199b-5p        | 2.97 | -0.01 | 0.43 | 0.92 |
| rRNA       | LSU-rRNA_Hsa-L339      | 2.35 | -0.01 | 0.43 | 0.92 |
| rRNA       | 5S-L357                | 2.11 | -0.01 | 0.43 | 0.92 |
| tRNA       | chr15.tRNA2-LysCTT     | 6.59 | 0.00  | 0.43 | 0.92 |
| scRNA      | HY4-L114               | 2.44 | -0.01 | 0.44 | 0.92 |
| mir-5p3pno | hsa-miR-3138           | 1.71 | 0.01  | 0.44 | 0.92 |
| piRNA      | piR-48772-L2           | 1.95 | -0.01 | 0.44 | 0.92 |
| tRNA       | chr12.tRNA4-AspGTC     | 4.64 | -0.01 | 0.44 | 0.92 |
| mir-5p     | hsa-let-7d-5p          | 8.11 | 0.00  | 0.44 | 0.92 |
| mir-3p     | hsa-miR-200a-3p        | 2.22 | -0.01 | 0.44 | 0.92 |
| snoRNA     | ACA54                  | 1.59 | -0.01 | 0.44 | 0.92 |
| tRNA       | chr16.tRNA31-PseudoTG  | 3.01 | -0.01 | 0.44 | 0.92 |
| mir-5p     | hsa-miR-345-5p         | 2.70 | -0.01 | 0.44 | 0.92 |
| piRNA      | piR-32950              | 6.31 | 0.00  | 0.44 | 0.92 |
| scRNA      | BC200-L93              | 1.59 | -0.01 | 0.44 | 0.92 |
| rRNA       | LSU-rRNA_Hsa-L51       | 4.19 | -0.01 | 0.44 | 0.92 |
| piRNA      | piR-35952-L5           | 2.44 | -0.01 | 0.44 | 0.92 |
| snRNA      | U5-L108                | 2.23 | -0.02 | 0.44 | 0.92 |
| snoRNA     | U85                    | 3.06 | -0.01 | 0.44 | 0.92 |
| scRNA      | HY4-L97                | 8.74 | 0.00  | 0.44 | 0.92 |
| snRNA      | U3-L79                 | 3.27 | -0.01 | 0.44 | 0.93 |
| scRNA      | HY3-L84                | 6.39 | 0.00  | 0.45 | 0.93 |
| piRNA      | piR-35284              | 8.07 | 0.00  | 0.45 | 0.93 |
| mir-3p     | hsa-miR-425-3p         | 4.14 | 0.00  | 0.45 | 0.93 |
| scRNA      | BC200-L49              | 4.36 | -0.01 | 0.45 | 0.93 |
| scRNA      | BC200-L43              | 3.28 | 0.00  | 0.45 | 0.93 |
| tRNA       | chr1.tRNA99-ValCAC     | 8.58 | 0.00  | 0.45 | 0.93 |
| scRNA      | HY3-L62                | 1.84 | -0.01 | 0.45 | 0.93 |
| rRNA       | LSU-rRNA_Hsa-L275      | 5.54 | 0.00  | 0.45 | 0.93 |
| scRNA      | HY4-L42                | 1.44 | -0.01 | 0.45 | 0.93 |
| mir-5p     | hsa-miR-625-5p         | 2.07 | -0.01 | 0.45 | 0.93 |
| rRNA       | 5S-L471                | 2.19 | 0.00  | 0.46 | 0.93 |
| rRNA       | 5S-L1214               | 1.33 | 0.01  | 0.46 | 0.93 |
| scRNA      | HY4-L110               | 1.99 | -0.01 | 0.46 | 0.93 |

|            |                     |       |       |      |      |
|------------|---------------------|-------|-------|------|------|
| snRNA      | U2-L765             | 2.07  | -0.02 | 0.46 | 0.93 |
| tRNA       | chr16.tRNA32-LysCTT | 2.11  | -0.01 | 0.46 | 0.93 |
| scRNA      | HY1-L434            | 6.45  | 0.00  | 0.46 | 0.93 |
| tRNA       | chr16.tRNA16-LeuAAG | 3.29  | -0.01 | 0.46 | 0.93 |
| piRNA      | piR-36412           | 2.36  | -0.01 | 0.46 | 0.93 |
| scRNA      | HY4-L17             | 10.67 | 0.00  | 0.46 | 0.93 |
| mir-5p3pno | hsa-miR-3909        | 1.71  | 0.01  | 0.46 | 0.93 |
| mir-5p     | hsa-miR-145-5p      | 1.79  | 0.01  | 0.46 | 0.93 |
| mir-5p     | hsa-miR-30d-5p      | 10.84 | 0.00  | 0.46 | 0.93 |
| tRNA       | chr11.tRNA11-LysTTT | 7.37  | 0.00  | 0.46 | 0.93 |
| rRNA       | LSU-rRNA_Hsa-L211   | 1.63  | -0.01 | 0.46 | 0.93 |
| tRNA       | chr1.tRNA9-ArgTCT   | 2.50  | -0.01 | 0.46 | 0.93 |
| mir-5p3pno | hsa-miR-1301        | 4.06  | 0.00  | 0.46 | 0.93 |
| scRNA      | HY4-L150            | 3.26  | -0.01 | 0.46 | 0.93 |
| mir-3p     | hsa-miR-2355-3p     | 1.86  | 0.01  | 0.46 | 0.93 |
| snoRNA     | HBII-166            | 3.05  | -0.01 | 0.47 | 0.93 |
| mir-5p3pno | hsa-miR-942         | 3.31  | -0.01 | 0.47 | 0.93 |
| mir-5p     | hsa-miR-766-5p      | 1.81  | -0.01 | 0.47 | 0.93 |
| mir-3p     | hsa-miR-374b-3p     | 2.49  | -0.01 | 0.47 | 0.93 |
| mir-5p3pno | hsa-miR-1294        | 1.62  | -0.01 | 0.47 | 0.93 |
| rRNA       | 5S-L790             | 4.09  | 0.00  | 0.47 | 0.93 |
| rRNA       | 5S-L676             | 1.34  | -0.01 | 0.47 | 0.93 |
| rRNA       | 5S-L526             | 1.32  | -0.01 | 0.47 | 0.93 |
| tRNA       | chr1.tRNA43-GlyGCC  | 6.87  | 0.00  | 0.47 | 0.93 |
| snRNA      | U2-L782             | 2.99  | -0.01 | 0.47 | 0.93 |
| tRNA       | chr5.tRNA8-AlaTGC   | 3.15  | -0.01 | 0.47 | 0.93 |
| scRNA      | HY4-L126            | 3.61  | -0.01 | 0.47 | 0.93 |
| snoRNA     | ACA3                | 2.48  | -0.01 | 0.47 | 0.93 |
| scRNA      | HY1-L13             | 2.51  | 0.00  | 0.47 | 0.93 |
| rRNA       | 5S-L389             | 1.35  | -0.02 | 0.47 | 0.93 |
| rRNA       | LSU-rRNA_Hsa-L366   | 4.93  | 0.00  | 0.47 | 0.93 |
| snRNA      | U4-L40              | 2.99  | 0.00  | 0.47 | 0.93 |
| mir-3p     | hsa-miR-126-3p      | 11.12 | 0.00  | 0.47 | 0.93 |
| mir-3p     | hsa-miR-99b-3p      | 3.53  | -0.01 | 0.47 | 0.93 |
| mir-3p     | hsa-miR-378a-3p     | 8.57  | 0.00  | 0.48 | 0.93 |
| mir-5p     | hsa-miR-151a-5p     | 6.40  | 0.00  | 0.48 | 0.93 |
| piRNA      | piR-58356           | 5.40  | 0.00  | 0.48 | 0.93 |
| scRNA      | HY1-L389            | 2.66  | 0.00  | 0.48 | 0.93 |
| mir-3p     | hsa-miR-424-3p      | 4.70  | 0.00  | 0.48 | 0.93 |
| rRNA       | 5S-L297             | 1.59  | -0.01 | 0.48 | 0.93 |
| scRNA      | BC200-L20           | 1.94  | -0.01 | 0.48 | 0.93 |
| piRNA      | piR-30890           | 3.30  | -0.01 | 0.48 | 0.93 |
| mir-3p     | hsa-miR-4446-3p     | 3.56  | 0.00  | 0.48 | 0.93 |

|            |                        |       |       |      |      |
|------------|------------------------|-------|-------|------|------|
| piRNA      | piR-61647-L4           | 3.62  | 0.00  | 0.48 | 0.93 |
| snRNA      | U6-L1308               | 2.67  | -0.01 | 0.48 | 0.93 |
| scRNA      | BC200-L161             | 1.53  | -0.01 | 0.48 | 0.93 |
| snRNA      | U5-L66                 | 6.99  | 0.00  | 0.48 | 0.93 |
| snRNA      | U1-L33                 | 2.56  | -0.01 | 0.49 | 0.93 |
| mir-5p     | hsa-miR-532-5p         | 7.72  | 0.00  | 0.49 | 0.93 |
| rRNA       | LSU-rRNA_Hsa-L53       | 2.22  | -0.01 | 0.49 | 0.93 |
| rRNA       | LSU-rRNA_Hsa-L257      | 4.58  | 0.00  | 0.49 | 0.93 |
| tRF3       | chr3.tRNA6-CysGCA-tRF3 | 2.19  | -0.01 | 0.49 | 0.93 |
| scRNA      | HY4-L130               | 14.43 | 0.00  | 0.49 | 0.93 |
| snRNA      | U2-L481                | 1.44  | -0.01 | 0.49 | 0.93 |
| tRF5       | chr11.tRNA16-ValTAC-tR | 1.57  | 0.01  | 0.49 | 0.93 |
| snRNA      | U7-L212                | 2.30  | -0.01 | 0.49 | 0.93 |
| snoRNA     | U38B                   | 2.95  | -0.01 | 0.49 | 0.93 |
| mir-3p     | hsa-miR-148a-3p        | 13.46 | 0.00  | 0.49 | 0.93 |
| snoRNA     | U49B                   | 1.62  | 0.01  | 0.49 | 0.93 |
| snoRNA     | U50B                   | 4.34  | 0.01  | 0.49 | 0.93 |
| rRNA       | LSU-rRNA_Hsa-L163      | 9.10  | 0.00  | 0.49 | 0.93 |
| snoRNA     | U93                    | 1.72  | -0.01 | 0.49 | 0.93 |
| snoRNA     | HBII-210               | 5.46  | 0.00  | 0.49 | 0.93 |
| tRNA       | chr11.tRNA12-ProTGG    | 8.16  | 0.00  | 0.50 | 0.93 |
| piRNA      | piR-35982              | 15.63 | 0.00  | 0.50 | 0.93 |
| rRNA       | LSU-rRNA_Hsa-L132      | 10.51 | 0.00  | 0.50 | 0.93 |
| snRNA      | U3-L74                 | 2.45  | -0.01 | 0.50 | 0.93 |
| rRNA       | SSU-rRNA_Hsa-L30       | 11.12 | 0.00  | 0.50 | 0.93 |
| tRNA       | chr6.tRNA28-IleAAT     | 3.35  | 0.00  | 0.50 | 0.93 |
| mir-5p     | hsa-let-7f-5p-L2       | 6.10  | 0.00  | 0.50 | 0.93 |
| tRF5       | chr6.tRNA56-PheGAA-tR  | 1.38  | -0.02 | 0.50 | 0.93 |
| mir-5p3pno | hsa-miR-320d-L2        | 3.63  | 0.00  | 0.50 | 0.93 |
| mir-5p     | hsa-miR-199a-5p        | 6.35  | 0.00  | 0.50 | 0.93 |
| mir-5p3pno | hsa-miR-378e           | 1.49  | 0.01  | 0.50 | 0.93 |
| mir-5p3pno | hsa-miR-210            | 2.15  | -0.01 | 0.50 | 0.93 |
| mir-5p     | hsa-miR-194-5p         | 4.46  | 0.00  | 0.51 | 0.93 |
| rRNA       | LSU-rRNA_Hsa-L161      | 1.84  | -0.01 | 0.51 | 0.93 |
| scRNA      | HY4-L83                | 4.19  | 0.00  | 0.51 | 0.93 |
| scRNA      | HY1-L292               | 5.48  | 0.00  | 0.51 | 0.93 |
| scRNA      | HY3-L287               | 1.40  | -0.01 | 0.51 | 0.93 |
| snRNA      | U2-L285                | 2.96  | -0.01 | 0.51 | 0.93 |
| snRNA      | U2-L709                | 3.25  | -0.01 | 0.51 | 0.93 |
| mir-3p     | hsa-miR-342-3p         | 3.63  | -0.01 | 0.51 | 0.93 |
| snoRNA     | SNORD126               | 2.74  | 0.01  | 0.51 | 0.93 |
| tRF5       | chr18.tRNA3-PseudoTCC  | 1.35  | -0.02 | 0.51 | 0.93 |
| rRNA       | 5S-L102                | 7.36  | 0.00  | 0.51 | 0.93 |



|            |                        |       |       |      |      |
|------------|------------------------|-------|-------|------|------|
| rRNA       | LSU-rRNA_Hsa-L333      | 4.08  | 0.00  | 0.51 | 0.93 |
| mir-3p     | hsa-miR-1185-1-3p      | 2.25  | 0.01  | 0.51 | 0.93 |
| rRNA       | LSU-rRNA_Hsa-L102      | 3.17  | 0.00  | 0.51 | 0.93 |
| tRNA       | chr6.tRNA147-SerAGA    | 8.22  | 0.00  | 0.52 | 0.93 |
| snRNA      | U1-L142                | 4.24  | 0.00  | 0.52 | 0.93 |
| snoRNA     | U53                    | 2.70  | -0.01 | 0.52 | 0.93 |
| rRNA       | 5S-L990                | 3.08  | 0.00  | 0.52 | 0.93 |
| mir-5p3pno | hsa-miR-4461           | 2.06  | -0.01 | 0.52 | 0.93 |
| mir-5p     | hsa-miR-148b-5p        | 2.86  | -0.01 | 0.52 | 0.93 |
| tRF5       | chr17.tRNA21-ArgCCT-tR | 1.46  | -0.01 | 0.52 | 0.93 |
| piRNA      | piR-44984-L3           | 2.62  | -0.01 | 0.52 | 0.93 |
| rRNA       | 5S-L1068               | 2.39  | -0.01 | 0.52 | 0.93 |
| snoRNA     | ACA11                  | 2.12  | 0.01  | 0.52 | 0.93 |
| piRNA      | piR-34804              | 4.98  | 0.00  | 0.52 | 0.93 |
| snRNA      | U1-L29                 | 2.02  | -0.01 | 0.52 | 0.93 |
| rRNA       | 5S-L109                | 9.56  | 0.00  | 0.52 | 0.93 |
| piRNA      | piR-33151-L9           | 3.44  | 0.00  | 0.52 | 0.93 |
| mir-5p3pno | hsa-miR-421            | 2.77  | 0.00  | 0.52 | 0.93 |
| snoRNA     | ACA61                  | 2.02  | -0.01 | 0.52 | 0.93 |
| mir-3p     | hsa-miR-423-3p         | 8.89  | 0.00  | 0.53 | 0.93 |
| tRF3       | chr17.tRNA13-GlyCCC-tR | 5.22  | 0.00  | 0.53 | 0.93 |
| snRNA      | U2-L615                | 13.00 | 0.00  | 0.53 | 0.93 |
| scRNA      | HY1-L179               | 6.39  | 0.00  | 0.53 | 0.93 |
| rRNA       | 5S-L1014               | 1.63  | -0.01 | 0.53 | 0.93 |
| mir-5p     | hsa-miR-1292-5p        | 1.70  | -0.01 | 0.53 | 0.93 |
| mir-5p     | hsa-miR-424-5p         | 2.86  | -0.01 | 0.53 | 0.93 |
| tRNA       | chr2.tRNA2-TyrGTA      | 1.69  | -0.01 | 0.53 | 0.93 |
| mir-5p3pno | hsa-miR-1290           | 2.05  | -0.01 | 0.53 | 0.93 |
| mir-5p     | hsa-miR-379-5p         | 5.35  | 0.00  | 0.53 | 0.93 |
| scRNA      | HY4-L38                | 4.19  | 0.00  | 0.53 | 0.93 |
| mir-3p     | hsa-miR-127-3p         | 5.06  | 0.00  | 0.53 | 0.93 |
| rRNA       | 5S-L1262               | 1.38  | -0.01 | 0.53 | 0.93 |
| tRNA       | chr17.tRNA13-GlyCCC    | 5.81  | 0.00  | 0.53 | 0.93 |
| scRNA      | HY3-L382               | 1.28  | -0.01 | 0.53 | 0.93 |
| tRNA       | chr6.tRNA88-PseudoGAA  | 8.20  | 0.00  | 0.53 | 0.93 |
| tRNA       | chr1.tRNA18-PseudoCCT  | 1.66  | -0.01 | 0.54 | 0.93 |
| tRF5       | chr16.tRNA8-ProTGG-tRF | 2.11  | 0.00  | 0.54 | 0.93 |
| snoRNA     | U37                    | 1.76  | -0.01 | 0.54 | 0.93 |
| mir-5p3pno | hsa-miR-378d-L2        | 1.37  | -0.01 | 0.54 | 0.93 |
| rRNA       | 5S-L136                | 1.53  | -0.01 | 0.54 | 0.93 |
| mir-5p     | hsa-miR-5010-5p        | 1.44  | -0.01 | 0.54 | 0.93 |
| snRNA      | U2-L161                | 12.39 | 0.00  | 0.54 | 0.93 |
| piRNA      | piR-60565-L9           | 1.87  | -0.01 | 0.54 | 0.93 |

|            |                    |       |       |      |      |
|------------|--------------------|-------|-------|------|------|
| scRNA      | HY1-L143           | 2.32  | 0.00  | 0.54 | 0.93 |
| piRNA      | piR-33160          | 1.68  | -0.01 | 0.54 | 0.93 |
| scRNA      | BC200-L134         | 1.43  | -0.01 | 0.54 | 0.93 |
| scRNA      | HY4-L135           | 18.67 | 0.00  | 0.54 | 0.93 |
| piRNA      | piR-32377          | 6.91  | 0.00  | 0.54 | 0.94 |
| scRNA      | HY4-L15            | 7.92  | 0.00  | 0.54 | 0.94 |
| tRNA       | chr6.tRNA40-ValTAC | 2.73  | 0.00  | 0.54 | 0.94 |
| mir-5p     | hsa-miR-1304-5p    | 1.47  | -0.01 | 0.54 | 0.94 |
| rRNA       | 5S-L106            | 12.29 | 0.00  | 0.54 | 0.94 |
| scRNA      | BC200-L19          | 1.37  | -0.01 | 0.55 | 0.94 |
| mir-5p3pno | hsa-miR-320e       | 1.85  | -0.01 | 0.55 | 0.94 |
| snoRNA     | U18B               | 2.75  | -0.01 | 0.55 | 0.94 |
| mir-3p     | hsa-miR-181a-2-3p  | 4.18  | 0.00  | 0.55 | 0.94 |
| rRNA       | 5S-L397            | 1.55  | -0.01 | 0.55 | 0.94 |
| piRNA      | piR-43995-L4       | 6.52  | 0.00  | 0.55 | 0.94 |
| snoRNA     | ACA47              | 3.23  | 0.00  | 0.55 | 0.94 |
| piRNA      | piR-34536          | 5.56  | 0.00  | 0.55 | 0.94 |
| scRNA      | HY3-L492           | 1.45  | -0.01 | 0.56 | 0.95 |
| scRNA      | HY4-L54            | 6.72  | 0.00  | 0.56 | 0.95 |
| mir-5p3pno | hsa-miR-451a       | 12.70 | 0.00  | 0.56 | 0.95 |
| tRNA       | chr13.tRNA4-GluCTC | 2.04  | -0.01 | 0.56 | 0.95 |
| rRNA       | SSU-rRNA_Hsa-L67   | 3.08  | 0.00  | 0.56 | 0.95 |
| snRNA      | U3-L4              | 1.56  | -0.01 | 0.56 | 0.95 |
| snoRNA     | U62B               | 3.71  | 0.00  | 0.56 | 0.95 |
| mir-5p3pno | hsa-miR-370        | 4.87  | 0.00  | 0.56 | 0.95 |
| mir-5p     | hsa-miR-106b-5p    | 3.53  | 0.00  | 0.56 | 0.95 |
| tRNA       | chr8.tRNA5-TyrGTA  | 1.91  | -0.01 | 0.56 | 0.95 |
| mir-3p     | hsa-miR-140-3p     | 9.02  | 0.00  | 0.56 | 0.95 |
| snoRNA     | U102               | 7.38  | 0.00  | 0.57 | 0.95 |
| scRNA      | HY4-L139           | 10.83 | 0.00  | 0.57 | 0.95 |
| scRNA      | BC200-L91          | 1.97  | 0.01  | 0.57 | 0.95 |
| rRNA       | 5S-L1071           | 1.54  | -0.01 | 0.57 | 0.95 |
| scRNA      | HY1-L393           | 1.73  | -0.01 | 0.57 | 0.95 |
| rRNA       | 5S-L515            | 2.06  | -0.01 | 0.57 | 0.95 |
| mir-5p     | hsa-miR-3679-5p    | 2.94  | 0.00  | 0.57 | 0.95 |
| piRNA      | piR-52041          | 1.91  | 0.01  | 0.57 | 0.95 |
| tRNA       | chr6.tRNA14-TyrGTA | 1.90  | -0.01 | 0.57 | 0.95 |
| mir-5p     | hsa-miR-361-5p     | 3.48  | 0.00  | 0.57 | 0.95 |
| mir-3p     | hsa-miR-3184-3p    | 11.60 | 0.00  | 0.57 | 0.95 |
| scRNA      | HY4-L132           | 2.50  | -0.01 | 0.57 | 0.95 |
| scRNA      | BC200-L138         | 4.89  | 0.00  | 0.57 | 0.95 |
| tRNA       | chr5.tRNA14-ProTGG | 4.85  | 0.00  | 0.57 | 0.95 |
| mir-3p     | hsa-miR-4433-3p    | 2.78  | 0.00  | 0.58 | 0.95 |

|            |                       |       |       |      |      |
|------------|-----------------------|-------|-------|------|------|
| rRNA       | LSU-rRNA_Hsa-L143     | 5.07  | 0.00  | 0.58 | 0.95 |
| scRNA      | HY1-L67               | 6.00  | 0.00  | 0.58 | 0.95 |
| piRNA      | piR-33065             | 4.52  | 0.00  | 0.58 | 0.95 |
| snoRNA     | ACA36                 | 1.89  | 0.01  | 0.58 | 0.95 |
| scRNA      | HY4-L3                | 2.42  | -0.01 | 0.58 | 0.95 |
| snoRNA     | U3-4                  | 7.31  | 0.00  | 0.58 | 0.95 |
| snoRNA     | U3-3                  | 2.20  | -0.01 | 0.58 | 0.95 |
| snoRNA     | U95                   | 6.95  | 0.00  | 0.58 | 0.95 |
| mir-3p     | hsa-miR-92b-3p        | 4.74  | 0.00  | 0.58 | 0.95 |
| rRNA       | LSU-rRNA_Hsa-L278     | 2.72  | 0.00  | 0.58 | 0.95 |
| snRNA      | U17-L2                | 2.12  | 0.01  | 0.58 | 0.95 |
| tRNA       | chr14.tRNA7-ArgACG    | 1.75  | -0.01 | 0.58 | 0.95 |
| tRF3       | chr10.tRNA5-PseudoCTG | 1.70  | -0.01 | 0.59 | 0.95 |
| mir-3p     | hsa-miR-493-3p        | 3.21  | 0.00  | 0.59 | 0.95 |
| rRNA       | SSU-rRNA_Hsa-L73      | 14.22 | 0.00  | 0.59 | 0.95 |
| snRNA      | U3-L75                | 3.12  | -0.01 | 0.59 | 0.95 |
| mir-5p     | hsa-miR-125b-5p-L2    | 3.27  | 0.00  | 0.59 | 0.95 |
| snoRNA     | HBI-43                | 3.60  | 0.00  | 0.59 | 0.95 |
| snoRNA     | HBI-100               | 4.44  | 0.00  | 0.59 | 0.95 |
| scRNA      | HY3-L282              | 3.75  | 0.00  | 0.59 | 0.95 |
| mir-5p3pno | hsa-miR-410           | 1.74  | 0.01  | 0.59 | 0.95 |
| tRNA       | chr6.tRNA86-PseudoTAC | 2.07  | -0.01 | 0.59 | 0.95 |
| tRNA       | chr16.tRNA33-PseudoAG | 3.64  | 0.00  | 0.59 | 0.95 |
| piRNA      | piR-33404             | 6.30  | 0.00  | 0.59 | 0.95 |
| mir-3p     | hsa-miR-548g-3p       | 2.14  | -0.01 | 0.59 | 0.95 |
| snoRNA     | U38A                  | 4.22  | -0.01 | 0.59 | 0.95 |
| snoRNA     | HBII-13               | 3.91  | -0.01 | 0.60 | 0.95 |
| snoRNA     | U26                   | 8.56  | 0.00  | 0.60 | 0.95 |
| snRNA      | U4-L41                | 2.29  | 0.00  | 0.60 | 0.95 |
| mir-5p3pno | hsa-miR-3168          | 2.09  | -0.01 | 0.60 | 0.95 |
| snoRNA     | U63                   | 5.92  | 0.00  | 0.60 | 0.95 |
| mir-3p     | hsa-miR-143-3p        | 9.70  | 0.00  | 0.60 | 0.95 |
| mir-5p     | hsa-miR-423-5p        | 3.96  | 0.00  | 0.60 | 0.95 |
| scRNA      | HY4-L71               | 5.97  | 0.00  | 0.60 | 0.95 |
| rRNA       | 5S-L105               | 5.89  | 0.00  | 0.60 | 0.95 |
| rRNA       | 5S-L247               | 1.54  | -0.01 | 0.60 | 0.95 |
| piRNA      | piR-43771-L6          | 2.90  | -0.01 | 0.60 | 0.95 |
| tRNA       | chr6.tRNA31-SerGCT    | 3.19  | 0.01  | 0.60 | 0.95 |
| mir-5p     | hsa-miR-493-5p        | 4.61  | 0.00  | 0.60 | 0.95 |
| snRNA      | U2-L250               | 12.48 | 0.00  | 0.61 | 0.95 |
| mir-5p     | hsa-miR-411-5p        | 2.70  | -0.01 | 0.61 | 0.95 |
| snoRNA     | snR38C                | 2.03  | 0.01  | 0.61 | 0.95 |
| snRNA      | U6-L1696              | 1.91  | 0.01  | 0.61 | 0.95 |

|            |                        |       |       |      |      |
|------------|------------------------|-------|-------|------|------|
| tRNA       | chr1.tRNA96-PseudoCCT  | 8.20  | 0.00  | 0.61 | 0.95 |
| tRNA       | chr6.tRNA11-IleAAT     | 8.31  | 0.00  | 0.61 | 0.95 |
| tRF5       | chr1.tRNA98-ValCAC-tRF | 2.65  | 0.00  | 0.61 | 0.95 |
| tRF3       | chr6.tRNA36-ArgACG-tRF | 4.47  | 0.00  | 0.61 | 0.95 |
| scRNA      | HY1-L287               | 6.16  | 0.00  | 0.61 | 0.95 |
| mir-3p     | hsa-miR-502-3p         | 2.26  | 0.00  | 0.61 | 0.95 |
| scRNA      | HY4-L77                | 2.15  | -0.01 | 0.61 | 0.95 |
| rRNA       | SSU-rRNA_Hsa-L72       | 14.26 | 0.00  | 0.61 | 0.95 |
| tRNA       | chr15.tRNA4-ArgTCG     | 2.60  | 0.00  | 0.61 | 0.95 |
| scRNA      | HY1-L435               | 3.49  | 0.00  | 0.61 | 0.95 |
| rRNA       | SSU-rRNA_Hsa-L33       | 12.79 | 0.00  | 0.61 | 0.95 |
| tRNA       | chr16.tRNA13-PseudoCT  | 4.70  | 0.00  | 0.62 | 0.95 |
| rRNA       | LSU-rRNA_Hsa-L60       | 12.44 | 0.00  | 0.62 | 0.95 |
| rRNA       | 5S-L550                | 2.32  | 0.00  | 0.62 | 0.95 |
| mir-5p     | hsa-miR-99b-5p         | 6.89  | 0.00  | 0.62 | 0.95 |
| mir-5p     | hsa-miR-193b-5p        | 2.08  | -0.01 | 0.62 | 0.95 |
| piRNA      | piR-31925-L9           | 13.82 | 0.00  | 0.62 | 0.95 |
| tRNA       | chr16.tRNA19-GlyGCC    | 1.88  | -0.01 | 0.62 | 0.95 |
| snRNA      | U7-L52                 | 6.85  | 0.00  | 0.62 | 0.95 |
| tRF5       | chr6.tRNA129-MetCAT-tf | 2.01  | 0.00  | 0.62 | 0.95 |
| rRNA       | LSU-rRNA_Hsa-L346      | 1.67  | -0.01 | 0.62 | 0.95 |
| mir-5p3pno | hsa-miR-1250           | 1.50  | 0.01  | 0.62 | 0.95 |
| mir-5p     | hsa-miR-99a-5p         | 7.41  | 0.00  | 0.62 | 0.95 |
| scRNA      | HY4-L98                | 9.97  | 0.00  | 0.62 | 0.95 |
| snoRNA     | ACA51                  | 2.15  | 0.00  | 0.62 | 0.95 |
| rRNA       | LSU-rRNA_Hsa-L18       | 5.98  | 0.00  | 0.62 | 0.95 |
| snoRNA     | E2                     | 2.14  | 0.01  | 0.62 | 0.95 |
| rRNA       | 5S-L957                | 1.43  | -0.01 | 0.63 | 0.95 |
| mir-5p     | hsa-miR-15b-5p         | 2.72  | 0.00  | 0.63 | 0.95 |
| snoRNA     | HBII-85-15             | 1.65  | 0.01  | 0.63 | 0.95 |
| snoRNA     | U18C                   | 1.82  | -0.01 | 0.63 | 0.95 |
| scRNA      | HY4-L138               | 8.42  | 0.00  | 0.63 | 0.95 |
| tRF5       | chr1.tRNA118-HisGTG-tR | 1.83  | -0.01 | 0.63 | 0.95 |
| tRNA       | chr6.tRNA82-GlyGCC     | 5.27  | 0.00  | 0.63 | 0.95 |
| scRNA      | HY1-L276               | 3.15  | 0.00  | 0.63 | 0.95 |
| tRNA       | chr2.tRNA3-AlaAGC      | 3.59  | 0.00  | 0.63 | 0.95 |
| tRF5       | chr3.tRNA5-LeuAAG-tRF5 | 3.59  | 0.00  | 0.63 | 0.95 |
| mir-5p3pno | hsa-miR-4485           | 4.29  | 0.00  | 0.63 | 0.95 |
| piRNA      | piR-37525              | 1.54  | -0.01 | 0.63 | 0.95 |
| piRNA      | piR-31638-L3           | 7.00  | 0.00  | 0.63 | 0.95 |
| mir-3p     | hsa-miR-222-3p         | 8.33  | 0.00  | 0.63 | 0.95 |
| scRNA      | HY4-L112               | 3.97  | 0.00  | 0.63 | 0.95 |
| scRNA      | HY1-L191               | 3.51  | 0.00  | 0.64 | 0.95 |

|        |                        |      |       |      |      |
|--------|------------------------|------|-------|------|------|
| scRNA  | HY4-L20                | 3.35 | 0.00  | 0.64 | 0.95 |
| tRF5   | chrX.tRNA1-PseudoTTG-t | 2.77 | 0.00  | 0.64 | 0.95 |
| scRNA  | HY1-L374               | 8.15 | 0.00  | 0.64 | 0.95 |
| snoRNA | U66                    | 1.79 | 0.00  | 0.64 | 0.95 |
| scRNA  | BC200-L46              | 1.64 | -0.01 | 0.64 | 0.95 |
| scRNA  | HY4-L18                | 1.43 | -0.01 | 0.64 | 0.95 |
| snRNA  | U2-L218                | 1.62 | -0.01 | 0.64 | 0.95 |
| scRNA  | HY1-L114               | 3.94 | 0.00  | 0.64 | 0.95 |
| rRNA   | LSU-rRNA_Hsa-L341      | 1.93 | -0.01 | 0.64 | 0.95 |
| rRNA   | 5S-L115                | 1.96 | 0.00  | 0.64 | 0.95 |
| piRNA  | piR-43772-L2           | 6.19 | 0.00  | 0.64 | 0.95 |
| snoRNA | U52                    | 2.73 | 0.00  | 0.65 | 0.95 |
| piRNA  | piR-31987              | 6.33 | 0.00  | 0.65 | 0.95 |
| tRF5   | chr20.tRNA7-PseudoCTC- | 1.40 | -0.01 | 0.65 | 0.95 |
| tRNA   | chr22.tRNA1-SeCTCA     | 2.22 | 0.00  | 0.65 | 0.95 |
| scRNA  | HY4-L99                | 1.47 | -0.01 | 0.65 | 0.95 |
| scRNA  | BC200-L114             | 2.21 | 0.00  | 0.65 | 0.95 |
| tRF5   | chr1.tRNA109-PseudoGT  | 1.70 | 0.00  | 0.65 | 0.95 |
| rRNA   | LSU-rRNA_Hsa-L385      | 8.75 | 0.00  | 0.65 | 0.95 |
| mir-5p | hsa-miR-503-5p         | 3.20 | 0.00  | 0.65 | 0.95 |
| snRNA  | U2-L205                | 1.72 | -0.01 | 0.65 | 0.95 |
| mir-5p | hsa-miR-548ay-5p       | 2.18 | -0.01 | 0.65 | 0.95 |
| mir-5p | hsa-miR-193a-5p        | 5.17 | 0.00  | 0.65 | 0.95 |
| piRNA  | piR-61648              | 2.28 | 0.00  | 0.65 | 0.95 |
| tRF3   | chr17.tRNA33-PseudoTTC | 4.41 | 0.00  | 0.65 | 0.95 |
| tRNA   | chr11.tRNA16-ValTAC    | 4.20 | 0.00  | 0.65 | 0.95 |
| mir-3p | hsa-miR-4742-3p        | 1.43 | 0.01  | 0.65 | 0.95 |
| mir-3p | hsa-miR-654-3p         | 3.75 | 0.00  | 0.65 | 0.95 |
| rRNA   | 5S-L804                | 4.97 | 0.00  | 0.65 | 0.95 |
| tRNA   | chr2.tRNA23-GlnTTG     | 3.06 | 0.00  | 0.65 | 0.95 |
| mir-5p | hsa-miR-301a-5p        | 1.39 | -0.01 | 0.66 | 0.95 |
| snoRNA | U103B                  | 3.29 | 0.00  | 0.66 | 0.95 |
| mir-3p | hsa-miR-199b-3p        | 7.58 | 0.00  | 0.66 | 0.95 |
| piRNA  | piR-35982-L6           | 1.98 | -0.01 | 0.66 | 0.95 |
| scRNA  | HY3-L199               | 1.72 | 0.00  | 0.66 | 0.95 |
| mir-3p | hsa-miR-3913-3p        | 1.59 | 0.01  | 0.66 | 0.95 |
| rRNA   | 5S-L803                | 7.74 | 0.00  | 0.66 | 0.95 |
| scRNA  | HY4-L87                | 9.96 | 0.00  | 0.66 | 0.95 |
| mir-5p | hsa-miR-23a-5p         | 1.78 | 0.00  | 0.66 | 0.95 |
| snoRNA | mgh18S-121             | 1.93 | -0.01 | 0.66 | 0.95 |
| snoRNA | U22                    | 3.81 | 0.00  | 0.66 | 0.95 |
| snoRNA | U83B                   | 2.68 | 0.00  | 0.66 | 0.95 |
| mir-5p | hsa-miR-454-5p         | 2.36 | 0.00  | 0.66 | 0.95 |

|            |                        |       |       |      |      |
|------------|------------------------|-------|-------|------|------|
| tRNA       | chr6.tRNA130-GlnTTG    | 3.35  | 0.00  | 0.66 | 0.95 |
| mir-5p     | hsa-miR-21-5p          | 13.59 | 0.00  | 0.66 | 0.95 |
| scRNA      | HY4-L59                | 4.56  | 0.00  | 0.67 | 0.95 |
| scRNA      | HY1-L263               | 2.72  | 0.00  | 0.67 | 0.95 |
| tRNA       | chr2.tRNA17-PseudoTTC  | 7.07  | 0.00  | 0.67 | 0.95 |
| snoRNA     | mgU6-47                | 1.72  | 0.00  | 0.67 | 0.95 |
| mir-3p     | hsa-miR-148b-3p        | 8.62  | 0.00  | 0.67 | 0.95 |
| mir-5p     | hsa-miR-660-5p         | 3.50  | 0.00  | 0.67 | 0.95 |
| mir-3p     | hsa-miR-1307-3p        | 7.96  | 0.00  | 0.67 | 0.95 |
| tRNA       | chr16.tRNA24-GlyGCC    | 15.82 | 0.00  | 0.67 | 0.95 |
| snoRNA     | U82                    | 5.05  | 0.00  | 0.67 | 0.95 |
| scRNA      | HY1-L174               | 1.36  | 0.00  | 0.67 | 0.95 |
| mir-5p     | hsa-miR-4665-5p        | 1.60  | -0.01 | 0.67 | 0.95 |
| rRNA       | LSU-rRNA_Hsa-L200      | 2.74  | 0.00  | 0.67 | 0.95 |
| mir-3p     | hsa-miR-27a-3p         | 10.82 | 0.00  | 0.67 | 0.95 |
| scRNA      | HY4-L102               | 8.16  | 0.00  | 0.67 | 0.95 |
| tRNA       | chr10.tRNA6-ValTAC     | 1.49  | 0.00  | 0.67 | 0.95 |
| tRNA       | chr1.tRNA72-AspGTC     | 7.23  | 0.00  | 0.67 | 0.95 |
| rRNA       | LSU-rRNA_Hsa-L73       | 2.19  | 0.00  | 0.67 | 0.95 |
| scRNA      | BC200-L154             | 1.41  | -0.01 | 0.67 | 0.95 |
| mir-5p     | hsa-let-7e-5p          | 5.52  | 0.00  | 0.67 | 0.95 |
| piRNA      | piR-36741              | 6.41  | 0.00  | 0.67 | 0.95 |
| rRNA       | 5S-L995                | 3.46  | 0.00  | 0.67 | 0.95 |
| tRNA       | chr6.tRNA157-ValCAC    | 1.40  | -0.01 | 0.67 | 0.95 |
| snoRNA     | ACA66                  | 2.24  | 0.00  | 0.67 | 0.95 |
| mir-5p     | hsa-miR-30e-5p         | 8.13  | 0.00  | 0.68 | 0.95 |
| snRNA      | U2-L603                | 6.16  | 0.00  | 0.68 | 0.95 |
| scRNA      | HY1-L100               | 8.91  | 0.00  | 0.68 | 0.95 |
| mir-5p     | hsa-miR-642b-5p        | 1.56  | -0.01 | 0.68 | 0.95 |
| mir-5p     | hsa-miR-3074-5p        | 9.31  | 0.00  | 0.68 | 0.95 |
| mir-3p     | hsa-let-7i-3p          | 1.50  | -0.01 | 0.68 | 0.95 |
| scRNA      | HY4-L136               | 2.51  | 0.00  | 0.68 | 0.95 |
| mir-5p     | hsa-miR-122-5p         | 9.88  | 0.00  | 0.68 | 0.95 |
| scRNA      | HY4-L154               | 1.53  | 0.00  | 0.68 | 0.95 |
| mir-5p     | hsa-miR-3184-5p        | 7.99  | 0.00  | 0.68 | 0.95 |
| scRNA      | HY1-L302               | 2.49  | 0.00  | 0.68 | 0.95 |
| rRNA       | 5S-L573                | 3.03  | 0.00  | 0.68 | 0.95 |
| tRF3       | chr18.tRNA1-GluCTC-tRF | 2.27  | 0.00  | 0.68 | 0.95 |
| mir-5p3pno | hsa-miR-1-L2           | 4.82  | 0.00  | 0.68 | 0.95 |
| piRNA      | piR-33151-L4           | 4.06  | 0.00  | 0.68 | 0.95 |
| piRNA      | piR-36741-L2           | 1.62  | -0.01 | 0.69 | 0.95 |
| scRNA      | HY3-L479               | 2.10  | -0.01 | 0.69 | 0.95 |
| mir-5p3pno | hsa-miR-4326           | 1.51  | -0.01 | 0.69 | 0.95 |

|            |                     |       |       |      |      |
|------------|---------------------|-------|-------|------|------|
| snRNA      | U14-L5              | 4.24  | 0.00  | 0.69 | 0.95 |
| scRNA      | BC200-L27           | 2.97  | 0.00  | 0.69 | 0.95 |
| snoRNA     | U20                 | 6.66  | 0.00  | 0.69 | 0.95 |
| mir-5p     | hsa-miR-96-5p       | 2.19  | 0.00  | 0.69 | 0.95 |
| snoRNA     | HBII-85-3           | 2.57  | -0.01 | 0.69 | 0.95 |
| scRNA      | HY3-L190            | 2.20  | 0.00  | 0.69 | 0.95 |
| mir-5p     | hsa-miR-146a-5p     | 9.39  | 0.00  | 0.69 | 0.95 |
| mir-3p     | hsa-miR-195-3p      | 1.91  | 0.00  | 0.69 | 0.95 |
| mir-3p     | hsa-miR-3529-3p     | 7.65  | 0.00  | 0.69 | 0.95 |
| scRNA      | HY1-L69             | 4.11  | 0.00  | 0.69 | 0.95 |
| mir-5p     | hsa-miR-483-5p      | 4.02  | 0.00  | 0.70 | 0.95 |
| rRNA       | 5S-L815             | 2.57  | 0.00  | 0.70 | 0.95 |
| piRNA      | piR-31925           | 11.30 | 0.00  | 0.70 | 0.95 |
| mir-5p     | hsa-miR-23b-5p      | 1.51  | -0.01 | 0.70 | 0.95 |
| mir-3p     | hsa-miR-576-3p      | 4.04  | 0.00  | 0.70 | 0.95 |
| piRNA      | piR-61646-L2        | 8.65  | 0.00  | 0.70 | 0.95 |
| piRNA      | piR-44984-L6        | 2.42  | 0.00  | 0.70 | 0.96 |
| mir-5p     | hsa-miR-181b-5p-L2  | 6.05  | 0.00  | 0.70 | 0.96 |
| scRNA      | BC200-L88           | 1.65  | -0.01 | 0.70 | 0.96 |
| rRNA       | LSU-rRNA_Hsa-L41    | 1.50  | -0.01 | 0.70 | 0.96 |
| scRNA      | HY4-L134            | 2.51  | 0.00  | 0.70 | 0.96 |
| mir-5p3pno | hsa-miR-206         | 2.36  | -0.01 | 0.70 | 0.96 |
| rRNA       | 5S-L1115            | 1.30  | -0.01 | 0.70 | 0.96 |
| mir-3p     | hsa-miR-671-3p      | 4.05  | 0.00  | 0.70 | 0.96 |
| tRNA       | chr16.tRNA27-LeuTAG | 2.11  | 0.00  | 0.70 | 0.96 |
| snoRNA     | U84                 | 2.09  | 0.00  | 0.71 | 0.96 |
| rRNA       | 5S-L578             | 2.37  | 0.00  | 0.71 | 0.96 |
| scRNA      | BC200-L135          | 2.24  | 0.00  | 0.71 | 0.96 |
| rRNA       | 5S-L233             | 2.20  | 0.00  | 0.71 | 0.96 |
| mir-3p     | hsa-miR-181c-3p     | 1.57  | 0.00  | 0.71 | 0.96 |
| mir-3p     | hsa-miR-106b-3p     | 7.66  | 0.00  | 0.71 | 0.96 |
| piRNA      | piR-39361           | 2.73  | -0.01 | 0.71 | 0.96 |
| snoRNA     | HBII-251            | 3.81  | 0.00  | 0.71 | 0.96 |
| snoRNA     | ACA44               | 2.30  | 0.00  | 0.71 | 0.96 |
| mir-5p3pno | hsa-miR-320a        | 11.48 | 0.00  | 0.71 | 0.96 |
| snoRNA     | ACA45               | 6.69  | 0.00  | 0.71 | 0.96 |
| mir-3p     | hsa-let-7d-3p       | 6.61  | 0.00  | 0.71 | 0.96 |
| snRNA      | U4-L24              | 1.61  | 0.00  | 0.71 | 0.96 |
| scRNA      | HY4-L81             | 3.17  | 0.00  | 0.72 | 0.96 |
| scRNA      | BC200-L9            | 2.83  | 0.00  | 0.72 | 0.96 |
| piRNA      | piR-37213           | 1.60  | 0.00  | 0.72 | 0.96 |
| tRNA       | chr16.tRNA17-LeuCAG | 3.37  | 0.00  | 0.72 | 0.96 |
| piRNA      | piR-31115-L2        | 6.67  | 0.00  | 0.72 | 0.96 |

|            |                        |       |       |      |      |
|------------|------------------------|-------|-------|------|------|
| rRNA       | LSU-rRNA_Hsa-L151      | 3.12  | 0.00  | 0.72 | 0.96 |
| tRNA       | chr1.tRNA5-GluTTC      | 5.89  | 0.00  | 0.72 | 0.96 |
| scRNA      | HY1-L430               | 1.34  | 0.00  | 0.72 | 0.96 |
| snRNA      | U2-L128                | 7.39  | 0.00  | 0.72 | 0.96 |
| mir-5p     | hsa-miR-550a-3-5p      | 1.55  | 0.00  | 0.72 | 0.96 |
| snRNA      | U1-L4                  | 8.27  | 0.00  | 0.72 | 0.96 |
| mir-5p3pno | hsa-miR-4447           | 1.30  | 0.00  | 0.72 | 0.96 |
| tRNA       | chr1.tRNA16-HisGTG     | 11.64 | 0.00  | 0.72 | 0.96 |
| mir-3p     | hsa-miR-3158-3p        | 3.71  | 0.00  | 0.72 | 0.96 |
| tRF5       | chr14.tRNA4-ThrTGT-tRF | 2.23  | 0.00  | 0.72 | 0.96 |
| scRNA      | HY3-L203               | 1.78  | 0.00  | 0.73 | 0.96 |
| mir-3p     | hsa-miR-369-3p         | 1.38  | -0.01 | 0.73 | 0.96 |
| mir-5p     | hsa-miR-4746-5p        | 1.73  | 0.00  | 0.73 | 0.96 |
| rRNA       | 5S-L731                | 1.51  | 0.00  | 0.73 | 0.96 |
| rRNA       | LSU-rRNA_Hsa-L380      | 13.98 | 0.00  | 0.73 | 0.96 |
| rRNA       | 5S-L762                | 4.86  | 0.00  | 0.73 | 0.96 |
| snoRNA     | HBII-85-8              | 2.21  | -0.01 | 0.73 | 0.96 |
| mir-5p3pno | hsa-miR-760            | 2.38  | 0.00  | 0.73 | 0.96 |
| tRNA       | chr6.tRNA122-PseudoTG  | 2.61  | 0.00  | 0.74 | 0.97 |
| scRNA      | HY1-L223               | 6.19  | 0.00  | 0.74 | 0.97 |
| tRNA       | chr1.tRNA39-GlyGCC     | 11.35 | 0.00  | 0.74 | 0.97 |
| rRNA       | LSU-rRNA_Hsa-L162      | 2.42  | 0.00  | 0.74 | 0.97 |
| rRNA       | LSU-rRNA_Hsa-L355      | 3.31  | 0.00  | 0.74 | 0.97 |
| mir-5p     | hsa-miR-335-5p         | 3.57  | 0.00  | 0.74 | 0.97 |
| snoRNA     | U13-L162               | 2.03  | 0.00  | 0.74 | 0.97 |
| rRNA       | 5S-L1164               | 2.08  | 0.00  | 0.74 | 0.97 |
| tRNA       | chr13.tRNA2-PseudoCTC  | 4.77  | 0.00  | 0.74 | 0.97 |
| tRNA       | chr16.tRNA4-ProAGG     | 2.50  | 0.00  | 0.74 | 0.97 |
| snRNA      | U14-L2                 | 1.79  | 0.00  | 0.74 | 0.97 |
| rRNA       | LSU-rRNA_Hsa-L66       | 1.87  | 0.00  | 0.75 | 0.97 |
| tRNA       | chr6.tRNA6-ArgACG      | 2.65  | 0.00  | 0.75 | 0.97 |
| tRNA       | chr6.tRNA83-LeuTAA     | 2.22  | 0.00  | 0.75 | 0.97 |
| scRNA      | BC200-L166             | 2.95  | 0.00  | 0.75 | 0.97 |
| piRNA      | piR-36444              | 2.53  | 0.00  | 0.75 | 0.97 |
| snoRNA     | U58C                   | 3.37  | 0.00  | 0.75 | 0.97 |
| rRNA       | 5S-L1270               | 1.27  | 0.00  | 0.75 | 0.97 |
| tRNA       | chr6.tRNA4-ArgTCG      | 2.79  | 0.00  | 0.75 | 0.97 |
| snoRNA     | mgh28S-2409            | 3.15  | 0.00  | 0.75 | 0.97 |
| snoRNA     | U42B                   | 4.22  | 0.00  | 0.75 | 0.97 |
| scRNA      | BC200-L72              | 1.58  | 0.00  | 0.75 | 0.97 |
| mir-5p     | hsa-miR-769-5p         | 3.02  | 0.00  | 0.75 | 0.97 |
| rRNA       | SSU-rRNA_Hsa-L10       | 11.45 | 0.00  | 0.75 | 0.97 |
| piRNA      | piR-51810-L2           | 8.21  | 0.00  | 0.75 | 0.97 |



|            |                         |       |       |      |      |
|------------|-------------------------|-------|-------|------|------|
| tRNA       | chr17.tRNA14-ThrCGT     | 1.87  | 0.00  | 0.75 | 0.97 |
| scRNA      | HY1-L326                | 1.43  | 0.01  | 0.75 | 0.97 |
| rRNA       | LSU-rRNA_Hsa-L15        | 6.48  | 0.00  | 0.75 | 0.97 |
| scRNA      | HY1-L295                | 4.37  | 0.00  | 0.76 | 0.97 |
| snRNA      | U2-L479                 | 1.54  | 0.00  | 0.76 | 0.97 |
| snoRNA     | HBII-336                | 2.07  | 0.00  | 0.76 | 0.97 |
| mir-5p3pno | hsa-miR-3609            | 2.87  | 0.00  | 0.76 | 0.97 |
| mir-5p3pno | hsa-miR-511-L2          | 3.90  | 0.00  | 0.76 | 0.97 |
| snoRNA     | U15B                    | 2.19  | 0.00  | 0.76 | 0.97 |
| scRNA      | BC200-L18               | 3.08  | 0.00  | 0.76 | 0.97 |
| mir-5p3pno | hsa-miR-1299            | 2.07  | -0.01 | 0.76 | 0.97 |
| mir-3p     | hsa-miR-574-3p          | 1.66  | 0.00  | 0.76 | 0.97 |
| mir-5p3pno | hsa-miR-1468            | 2.31  | 0.00  | 0.76 | 0.97 |
| mir-3p     | hsa-let-7a-3p-L2        | 3.02  | 0.00  | 0.77 | 0.97 |
| scRNA      | HY1-L442                | 1.33  | 0.00  | 0.77 | 0.97 |
| scRNA      | HY4-L21                 | 2.22  | 0.00  | 0.77 | 0.97 |
| tRF3       | chr14.tRNA10-IleAAT-tRF | 2.47  | 0.00  | 0.77 | 0.97 |
| scRNA      | HY4-L111                | 9.50  | 0.00  | 0.77 | 0.97 |
| mir-3p     | hsa-miR-3187-3p         | 1.63  | 0.00  | 0.77 | 0.97 |
| scRNA      | HY4-L72                 | 7.28  | 0.00  | 0.77 | 0.97 |
| rRNA       | 5S-L254                 | 2.29  | 0.00  | 0.77 | 0.97 |
| mir-5p     | hsa-miR-9-5p-L3         | 3.09  | 0.00  | 0.77 | 0.97 |
| mir-5p     | hsa-miR-181a-5p-L2      | 8.55  | 0.00  | 0.77 | 0.97 |
| rRNA       | 5S-L137                 | 1.95  | 0.00  | 0.77 | 0.97 |
| mir-5p     | hsa-let-7b-5p           | 12.45 | 0.00  | 0.77 | 0.97 |
| mir-5p     | hsa-miR-1255b-5p-L2     | 1.62  | 0.00  | 0.77 | 0.97 |
| tRF3       | chr15.tRNA6-PseudoCTT-  | 2.01  | 0.00  | 0.77 | 0.97 |
| rRNA       | LSU-rRNA_Hsa-L84        | 2.85  | 0.00  | 0.77 | 0.97 |
| rRNA       | 5S-L1178                | 1.51  | 0.00  | 0.77 | 0.97 |
| tRNA       | chr2.tRNA13-AlaCGC      | 6.52  | 0.00  | 0.77 | 0.97 |
| rRNA       | 5S-L253                 | 3.20  | 0.00  | 0.77 | 0.97 |
| piRNA      | piR-31447               | 1.47  | 0.00  | 0.77 | 0.97 |
| scRNA      | HY1-L133                | 2.77  | 0.00  | 0.77 | 0.97 |
| piRNA      | piR-52416-L2            | 2.28  | 0.00  | 0.78 | 0.97 |
| piRNA      | piR-31638               | 1.74  | 0.00  | 0.78 | 0.97 |
| scRNA      | HY4-L43                 | 2.22  | 0.00  | 0.78 | 0.97 |
| snoRNA     | ACA36B                  | 3.83  | 0.00  | 0.78 | 0.97 |
| mir-5p     | hsa-miR-132-5p          | 2.49  | 0.00  | 0.78 | 0.97 |
| snoRNA     | ACA20                   | 2.30  | 0.00  | 0.78 | 0.97 |
| piRNA      | piR-45195-L2            | 1.33  | -0.01 | 0.78 | 0.97 |
| snoRNA     | U45A                    | 4.15  | 0.00  | 0.78 | 0.97 |
| rRNA       | 5S-L986                 | 1.69  | 0.00  | 0.78 | 0.97 |
| mir-3p     | hsa-miR-27b-3p          | 8.94  | 0.00  | 0.78 | 0.97 |

|            |                        |       |       |      |      |
|------------|------------------------|-------|-------|------|------|
| rRNA       | 5S-L877                | 2.33  | 0.00  | 0.78 | 0.97 |
| snoRNA     | U15A                   | 2.08  | 0.00  | 0.79 | 0.97 |
| snoRNA     | ACA3-2                 | 2.59  | 0.00  | 0.79 | 0.97 |
| scRNA      | BC200-L36              | 2.68  | 0.00  | 0.79 | 0.97 |
| tRF5       | chr20.tRNA6-LeuAAG-tRF | 3.01  | 0.00  | 0.79 | 0.97 |
| tRF3       | chr17.tRNA1-Pseudo???  | 2.09  | 0.00  | 0.79 | 0.97 |
| tRNA       | chr1.tRNA137-Pseudo??? | 6.02  | 0.00  | 0.79 | 0.97 |
| mir-3p     | hsa-miR-30c-2-3p       | 1.38  | 0.00  | 0.79 | 0.97 |
| scRNA      | HY4                    | 10.16 | 0.00  | 0.80 | 0.97 |
| scRNA      | HY4-L151               | 2.39  | 0.00  | 0.80 | 0.97 |
| mir-3p     | hsa-miR-505-3p         | 2.00  | 0.00  | 0.80 | 0.97 |
| mir-5p3pno | hsa-miR-107            | 1.72  | 0.00  | 0.80 | 0.97 |
| scRNA      | HY1-L78                | 1.39  | 0.00  | 0.80 | 0.97 |
| tRF5       | chr1.tRNA130-ValCAC-tR | 2.38  | 0.00  | 0.80 | 0.97 |
| snRNA      | U1-L71                 | 5.05  | 0.00  | 0.80 | 0.97 |
| mir-3p     | hsa-miR-374c-3p        | 2.90  | 0.00  | 0.80 | 0.97 |
| scRNA      | HY1-L111               | 1.94  | 0.00  | 0.80 | 0.97 |
| mir-3p     | hsa-miR-151a-3p        | 11.62 | 0.00  | 0.80 | 0.97 |
| snoRNA     | HBII-82B               | 2.38  | 0.00  | 0.80 | 0.97 |
| snoRNA     | HBII-289               | 7.18  | 0.00  | 0.80 | 0.97 |
| snoRNA     | snR38B                 | 3.26  | 0.00  | 0.80 | 0.97 |
| tRNA       | chrX.tRNA2-LeuTAA      | 1.38  | 0.00  | 0.80 | 0.97 |
| rRNA       | 5S-L100                | 2.88  | 0.00  | 0.80 | 0.97 |
| mir-5p     | hsa-miR-129-5p-L2      | 1.82  | 0.00  | 0.80 | 0.98 |
| tRNA       | chr11.tRNA8-SerGCT     | 4.09  | 0.00  | 0.81 | 0.98 |
| piRNA      | piR-57824              | 1.45  | 0.00  | 0.81 | 0.98 |
| snoRNA     | U21                    | 4.60  | 0.00  | 0.81 | 0.98 |
| tRNA       | chr1.tRNA106-HisGTG    | 3.36  | 0.00  | 0.81 | 0.98 |
| mir-3p     | hsa-miR-539-3p         | 1.61  | -0.01 | 0.81 | 0.98 |
| mir-5p     | hsa-miR-2115-5p        | 1.27  | 0.00  | 0.81 | 0.98 |
| snRNA      | U2-L388                | 3.41  | 0.00  | 0.81 | 0.98 |
| snoRNA     | HBII-202               | 6.44  | 0.00  | 0.81 | 0.98 |
| tRF5       | chr14.tRNA8-CysGCA-tRF | 2.18  | 0.00  | 0.81 | 0.98 |
| rRNA       | LSU-rRNA_Hsa-L189      | 4.24  | 0.00  | 0.81 | 0.98 |
| mir-3p     | hsa-miR-411-3p         | 1.75  | 0.00  | 0.81 | 0.98 |
| scRNA      | HY4-L153               | 8.62  | 0.00  | 0.81 | 0.98 |
| mir-3p     | hsa-miR-146b-3p        | 2.42  | 0.00  | 0.81 | 0.98 |
| snoRNA     | HBII-276               | 3.49  | 0.00  | 0.81 | 0.98 |
| snoRNA     | ACA7                   | 2.30  | 0.00  | 0.81 | 0.98 |
| tRF3       | chr18.tRNA2-PseudoTCC- | 3.09  | 0.00  | 0.82 | 0.98 |
| snoRNA     | HBII-82                | 2.14  | 0.00  | 0.82 | 0.98 |
| mir-3p     | hsa-let-7b-3p          | 3.86  | 0.00  | 0.82 | 0.98 |
| tRNA       | chr17.tRNA3-GlnCTG     | 6.70  | 0.00  | 0.82 | 0.98 |

|            |                        |       |      |      |      |
|------------|------------------------|-------|------|------|------|
| tRNA       | chr6.tRNA98-LeuAAG     | 2.93  | 0.00 | 0.82 | 0.98 |
| mir-3p     | hsa-miR-323b-3p        | 3.62  | 0.00 | 0.82 | 0.98 |
| piRNA      | piR-36707              | 5.03  | 0.00 | 0.82 | 0.98 |
| snoRNA     | U45B                   | 2.57  | 0.00 | 0.82 | 0.98 |
| tRF3       | chr12.tRNA7-AspGTC-tRF | 1.65  | 0.00 | 0.82 | 0.98 |
| mir-3p     | hsa-miR-30d-3p         | 1.67  | 0.00 | 0.82 | 0.98 |
| mir-5p3pno | hsa-miR-378f           | 1.69  | 0.00 | 0.82 | 0.98 |
| piRNA      | piR-38600              | 3.94  | 0.00 | 0.82 | 0.98 |
| tRNA       | chr5.tRNA15-ValAAC     | 4.70  | 0.00 | 0.83 | 0.98 |
| piRNA      | piR-41588              | 1.60  | 0.00 | 0.83 | 0.98 |
| mir-5p     | hsa-miR-485-5p         | 4.20  | 0.00 | 0.83 | 0.98 |
| mir-5p     | hsa-miR-30b-5p         | 2.47  | 0.00 | 0.83 | 0.98 |
| scRNA      | HY1-L155               | 2.69  | 0.00 | 0.83 | 0.98 |
| tRF3       | chr6.tRNA37-ValAAC-tRF | 12.93 | 0.00 | 0.83 | 0.98 |
| piRNA      | piR-35469              | 1.70  | 0.00 | 0.83 | 0.98 |
| snoRNA     | U64                    | 2.08  | 0.00 | 0.83 | 0.98 |
| tRNA       | chr6.tRNA15-TyrGTA     | 5.52  | 0.00 | 0.83 | 0.98 |
| snoRNA     | U96a                   | 3.47  | 0.00 | 0.83 | 0.98 |
| rRNA       | 5S-L189                | 2.24  | 0.00 | 0.83 | 0.98 |
| piRNA      | piR-49145              | 2.41  | 0.00 | 0.84 | 0.98 |
| mir-5p     | hsa-miR-369-5p         | 1.73  | 0.00 | 0.84 | 0.98 |
| mir-3p     | hsa-miR-18a-3p         | 2.18  | 0.00 | 0.84 | 0.98 |
| mir-5p     | hsa-miR-142-5p         | 5.73  | 0.00 | 0.84 | 0.98 |
| mir-3p     | hsa-miR-582-3p         | 4.81  | 0.00 | 0.84 | 0.98 |
| scRNA      | HY1-L443               | 7.16  | 0.00 | 0.84 | 0.98 |
| snRNA      | U14-L3                 | 1.49  | 0.00 | 0.84 | 0.98 |
| snRNA      | U5-L133                | 2.25  | 0.00 | 0.84 | 0.98 |
| piRNA      | piR-33650              | 3.04  | 0.00 | 0.84 | 0.98 |
| rRNA       | LSU-rRNA_Hsa-L249      | 7.95  | 0.00 | 0.84 | 0.98 |
| rRNA       | LSU-rRNA_Hsa-L4        | 8.09  | 0.00 | 0.84 | 0.98 |
| mir-5p     | hsa-miR-3173-5p        | 2.41  | 0.00 | 0.84 | 0.98 |
| snoRNA     | U91                    | 2.24  | 0.00 | 0.84 | 0.98 |
| mir-3p     | hsa-miR-323a-3p        | 3.26  | 0.00 | 0.84 | 0.98 |
| mir-5p3pno | hsa-miR-1908           | 3.10  | 0.00 | 0.84 | 0.98 |
| mir-5p     | hsa-miR-450b-5p        | 5.25  | 0.00 | 0.84 | 0.98 |
| mir-5p3pno | hsa-miR-3672           | 1.53  | 0.00 | 0.84 | 0.98 |
| scRNA      | BC200-L28              | 2.06  | 0.00 | 0.84 | 0.98 |
| snoRNA     | U50                    | 5.82  | 0.00 | 0.84 | 0.98 |
| tRF3       | chr2.tRNA21-SerTGA-tRF | 2.33  | 0.00 | 0.84 | 0.98 |
| rRNA       | 5S-L955                | 1.52  | 0.00 | 0.84 | 0.98 |
| snoRNA     | HBII-142               | 3.42  | 0.00 | 0.85 | 0.98 |
| tRNA       | chr2.tRNA22-PseudoTTG  | 3.03  | 0.00 | 0.85 | 0.98 |
| snoRNA     | HBII-295               | 3.05  | 0.00 | 0.85 | 0.98 |

|            |                        |       |      |      |      |
|------------|------------------------|-------|------|------|------|
| scRNA      | HY1-L243               | 6.54  | 0.00 | 0.85 | 0.98 |
| mir-3p     | hsa-miR-10a-3p         | 1.82  | 0.00 | 0.85 | 0.98 |
| mir-3p     | hsa-miR-30e-3p         | 8.45  | 0.00 | 0.85 | 0.98 |
| scRNA      | HY1-L190               | 2.42  | 0.00 | 0.85 | 0.98 |
| snoRNA     | HBII-85-10             | 1.77  | 0.00 | 0.85 | 0.98 |
| piRNA      | piR-59299              | 1.72  | 0.00 | 0.85 | 0.98 |
| snoRNA     | U79                    | 1.72  | 0.00 | 0.85 | 0.98 |
| mir-5p     | hsa-let-7a-5p          | 2.02  | 0.00 | 0.85 | 0.98 |
| tRF3       | chr3.tRNA10-PseudoCTC  | 1.55  | 0.00 | 0.85 | 0.98 |
| piRNA      | piR-52416              | 1.72  | 0.00 | 0.85 | 0.98 |
| scRNA      | HY4-L14                | 8.83  | 0.00 | 0.86 | 0.98 |
| mir-5p     | hsa-miR-148a-5p        | 4.17  | 0.00 | 0.86 | 0.98 |
| scRNA      | BC200-L116             | 2.42  | 0.00 | 0.86 | 0.98 |
| snoRNA     | ACA46                  | 2.20  | 0.00 | 0.86 | 0.98 |
| scRNA      | HY1-L212               | 2.69  | 0.00 | 0.86 | 0.98 |
| scRNA      | HY1-L227               | 1.30  | 0.00 | 0.86 | 0.98 |
| mir-5p     | hsa-miR-339-5p         | 1.85  | 0.00 | 0.86 | 0.98 |
| mir-3p     | hsa-miR-185-3p         | 2.98  | 0.00 | 0.86 | 0.98 |
| snoRNA     | U92                    | 2.16  | 0.00 | 0.86 | 0.98 |
| rRNA       | LSU-rRNA_Hsa-L29       | 2.54  | 0.00 | 0.86 | 0.98 |
| mir-5p     | hsa-miR-331-5p         | 1.28  | 0.00 | 0.86 | 0.98 |
| mir-5p3pno | hsa-miR-1244-L2        | 1.66  | 0.00 | 0.86 | 0.98 |
| tRNA       | chr6.tRNA131-GlnCTG    | 1.62  | 0.00 | 0.86 | 0.98 |
| tRF3       | chrX.tRNA2-LeuTAA-tRF3 | 1.82  | 0.00 | 0.86 | 0.98 |
| snoRNA     | U32A                   | 4.08  | 0.00 | 0.86 | 0.98 |
| scRNA      | HY4-L53                | 3.75  | 0.00 | 0.86 | 0.98 |
| snoRNA     | SNORD119               | 5.61  | 0.00 | 0.86 | 0.98 |
| scRNA      | HY1-L414               | 1.30  | 0.00 | 0.86 | 0.98 |
| scRNA      | HY1-L409               | 2.73  | 0.00 | 0.87 | 0.98 |
| snRNA      | U2-L825                | 3.19  | 0.00 | 0.87 | 0.98 |
| rRNA       | 5S-L1234               | 5.10  | 0.00 | 0.87 | 0.98 |
| snoRNA     | ACA58                  | 1.85  | 0.00 | 0.87 | 0.98 |
| rRNA       | LSU-rRNA_Hsa-L251      | 7.46  | 0.00 | 0.87 | 0.98 |
| scRNA      | HY4-L122               | 7.82  | 0.00 | 0.87 | 0.98 |
| tRNA       | chr16.tRNA18-GlyGCC    | 1.78  | 0.00 | 0.87 | 0.98 |
| tRNA       | chr17.tRNA15-CysGCA    | 6.11  | 0.00 | 0.87 | 0.98 |
| mir-5p     | hsa-miR-877-5p         | 2.35  | 0.00 | 0.88 | 0.98 |
| scRNA      | HY1-L391               | 14.88 | 0.00 | 0.88 | 0.98 |
| scRNA      | BC200-L149             | 1.76  | 0.00 | 0.88 | 0.98 |
| snoRNA     | U105                   | 2.35  | 0.00 | 0.88 | 0.98 |
| mir-5p3pno | hsa-miR-375            | 6.00  | 0.00 | 0.88 | 0.98 |
| rRNA       | SSU-rRNA_Hsa-L34       | 5.52  | 0.00 | 0.88 | 0.98 |
| rRNA       | 5S-L602                | 5.12  | 0.00 | 0.88 | 0.98 |

|            |                         |       |       |      |      |
|------------|-------------------------|-------|-------|------|------|
| mir-5p3pno | hsa-miR-451b            | 2.85  | 0.00  | 0.88 | 0.98 |
| mir-3p     | hsa-miR-130a-3p         | 3.58  | 0.00  | 0.88 | 0.98 |
| mir-5p     | hsa-miR-224-5p          | 6.88  | 0.00  | 0.88 | 0.98 |
| tRNA       | chr6.tRNA85-PseudoTTC   | 4.59  | 0.00  | 0.88 | 0.98 |
| scRNA      | HY1-L45                 | 1.90  | 0.00  | 0.88 | 0.98 |
| mir-3p     | hsa-miR-223-3p          | 7.30  | 0.00  | 0.88 | 0.98 |
| piRNA      | piR-31068-L10           | 2.13  | 0.00  | 0.88 | 0.98 |
| piRNA      | piR-35982-L11           | 1.95  | 0.00  | 0.88 | 0.98 |
| snoRNA     | U35A                    | 1.80  | 0.00  | 0.88 | 0.98 |
| mir-3p     | hsa-miR-361-3p          | 7.04  | 0.00  | 0.88 | 0.98 |
| snRNA      | U2-L302                 | 4.05  | 0.00  | 0.88 | 0.98 |
| piRNA      | piR-53659               | 2.18  | -0.01 | 0.88 | 0.98 |
| piRNA      | piR-34041               | 4.17  | 0.00  | 0.89 | 0.98 |
| snoRNA     | U41                     | 2.48  | 0.00  | 0.89 | 0.98 |
| rRNA       | LSU-rRNA_Hsa-L300       | 7.63  | 0.00  | 0.89 | 0.98 |
| scRNA      | HY1-L171                | 1.68  | 0.00  | 0.89 | 0.98 |
| tRF3       | chr16.tRNA11-ProAGG-tF  | 1.79  | 0.00  | 0.89 | 0.98 |
| mir-3p     | hsa-miR-132-3p          | 1.92  | 0.00  | 0.89 | 0.98 |
| snRNA      | U2-L405                 | 3.55  | 0.00  | 0.89 | 0.98 |
| scRNA      | BC200-L67               | 4.18  | 0.00  | 0.89 | 0.98 |
| mir-3p     | hsa-miR-19a-3p          | 4.16  | 0.00  | 0.89 | 0.98 |
| mir-5p     | hsa-miR-452-5p          | 1.74  | 0.00  | 0.89 | 0.98 |
| mir-3p     | hsa-miR-1306-3p         | 2.00  | 0.00  | 0.89 | 0.98 |
| rRNA       | LSU-rRNA_Hsa-L109       | 1.47  | 0.00  | 0.89 | 0.98 |
| snoRNA     | U56                     | 2.63  | 0.00  | 0.89 | 0.98 |
| piRNA      | piR-36742               | 5.15  | 0.00  | 0.89 | 0.98 |
| snoRNA     | U99                     | 3.13  | 0.00  | 0.89 | 0.98 |
| tRNA       | chr3.tRNA10-PseudoCTC   | 7.60  | 0.00  | 0.89 | 0.98 |
| tRF5       | chr6.tRNA109-PheGAA-tF  | 2.26  | 0.00  | 0.90 | 0.98 |
| tRF5       | chr3.tRNA9-PseudoTTG-tF | 1.99  | 0.00  | 0.90 | 0.98 |
| mir-5p     | hsa-miR-223-5p          | 8.71  | 0.00  | 0.90 | 0.98 |
| tRNA       | chr12.tRNA6-TrpCCA      | 2.86  | 0.00  | 0.90 | 0.98 |
| scRNA      | BC200-L7                | 2.61  | 0.00  | 0.90 | 0.98 |
| tRNA       | chr18.tRNA4-LysCTT      | 6.31  | 0.00  | 0.90 | 0.98 |
| mir-5p3pno | hsa-miR-128             | 8.32  | 0.00  | 0.90 | 0.98 |
| rRNA       | 5S-L282                 | 1.46  | 0.00  | 0.90 | 0.98 |
| mir-3p     | hsa-miR-2115-3p         | 1.61  | 0.00  | 0.90 | 0.98 |
| snRNA      | U2-L532                 | 3.08  | 0.00  | 0.91 | 0.98 |
| snoRNA     | HBII-382                | 2.17  | 0.00  | 0.91 | 0.98 |
| rRNA       | SSU-rRNA_Hsa-L50        | 4.47  | 0.00  | 0.91 | 0.98 |
| snoRNA     | U100                    | 1.54  | 0.00  | 0.91 | 0.98 |
| piRNA      | piR-32678-L3            | 10.98 | 0.00  | 0.91 | 0.98 |
| tRNA       | chr3.tRNA7-CysGCA       | 1.80  | 0.00  | 0.91 | 0.98 |

|            |                        |       |      |      |      |
|------------|------------------------|-------|------|------|------|
| snoRNA     | HBII-429               | 4.20  | 0.00 | 0.91 | 0.98 |
| mir-5p     | hsa-miR-432-5p         | 5.13  | 0.00 | 0.91 | 0.98 |
| mir-5p3pno | hsa-miR-181d           | 3.90  | 0.00 | 0.91 | 0.98 |
| piRNA      | piR-35413-L2           | 1.56  | 0.00 | 0.91 | 0.98 |
| scRNA      | HY1-L208               | 3.29  | 0.00 | 0.91 | 0.98 |
| scRNA      | HY1-L183               | 2.44  | 0.00 | 0.91 | 0.98 |
| mir-5p     | hsa-miR-27b-5p         | 1.72  | 0.00 | 0.91 | 0.98 |
| rRNA       | LSU-rRNA_Hsa-L64       | 1.52  | 0.00 | 0.91 | 0.98 |
| snoRNA     | U97                    | 1.93  | 0.00 | 0.91 | 0.98 |
| mir-3p     | hsa-miR-1273g-3p       | 5.83  | 0.00 | 0.91 | 0.98 |
| tRF3       | chr16.tRNA28-ProTGG-tR | 1.99  | 0.00 | 0.91 | 0.98 |
| mir-5p     | hsa-miR-7-5p-L3        | 1.44  | 0.00 | 0.91 | 0.98 |
| snoRNA     | U47                    | 3.87  | 0.00 | 0.91 | 0.98 |
| scRNA      | HY1-L269               | 1.88  | 0.00 | 0.92 | 0.98 |
| mir-5p     | hsa-miR-10a-5p         | 8.93  | 0.00 | 0.92 | 0.98 |
| tRNA       | chr7.tRNA21-CysGCA     | 1.68  | 0.00 | 0.92 | 0.98 |
| rRNA       | 5S-L367                | 1.90  | 0.00 | 0.92 | 0.98 |
| rRNA       | LSU-rRNA_Hsa-L178      | 3.24  | 0.00 | 0.92 | 0.98 |
| scRNA      | HY4-L96                | 3.68  | 0.00 | 0.92 | 0.98 |
| snRNA      | U6-L440                | 1.97  | 0.00 | 0.92 | 0.98 |
| tRF5       | chr17.tRNA33-PseudoTTC | 5.92  | 0.00 | 0.92 | 0.98 |
| snoRNA     | U36B                   | 1.73  | 0.00 | 0.92 | 0.98 |
| mir-5p     | hsa-miR-505-5p         | 1.81  | 0.00 | 0.92 | 0.98 |
| mir-3p     | hsa-miR-17-3p          | 1.53  | 0.00 | 0.92 | 0.98 |
| mir-5p3pno | hsa-miR-941            | 6.39  | 0.00 | 0.92 | 0.98 |
| rRNA       | 5S-L612                | 2.86  | 0.00 | 0.92 | 0.98 |
| mir-5p3pno | hsa-miR-484            | 6.24  | 0.00 | 0.92 | 0.98 |
| rRNA       | LSU-rRNA_Hsa-L383      | 14.16 | 0.00 | 0.92 | 0.98 |
| snRNA      | U1-L174                | 1.76  | 0.00 | 0.92 | 0.98 |
| scRNA      | HY3-L432               | 1.48  | 0.00 | 0.92 | 0.98 |
| tRF5       | chr1.tRNA125-PseudoGT  | 1.49  | 0.00 | 0.92 | 0.98 |
| scRNA      | HY1-L149               | 3.78  | 0.00 | 0.93 | 0.98 |
| piRNA      | piR-35952-L4           | 3.22  | 0.00 | 0.93 | 0.98 |
| scRNA      | HY1-L352               | 1.78  | 0.00 | 0.93 | 0.98 |
| snoRNA     | U81                    | 6.27  | 0.00 | 0.93 | 0.98 |
| snoRNA     | U60                    | 4.21  | 0.00 | 0.93 | 0.98 |
| rRNA       | LSU-rRNA_Hsa-L220      | 4.41  | 0.00 | 0.93 | 0.98 |
| snRNA      | U6-L503                | 1.31  | 0.00 | 0.93 | 0.98 |
| snoRNA     | SNORD125               | 1.68  | 0.00 | 0.93 | 0.98 |
| tRF5       | chr6.tRNA114-ArgCCG-tR | 1.61  | 0.00 | 0.93 | 0.98 |
| snoRNA     | U23                    | 1.46  | 0.00 | 0.93 | 0.98 |
| mir-5p3pno | hsa-miR-3615           | 7.34  | 0.00 | 0.93 | 0.98 |
| tRF5       | chr1.tRNA132-PseudoCA  | 2.10  | 0.00 | 0.94 | 0.98 |

|            |                         |       |      |      |      |
|------------|-------------------------|-------|------|------|------|
| mir-3p     | hsa-miR-30a-3p          | 5.31  | 0.00 | 0.94 | 0.98 |
| mir-5p     | hsa-miR-25-5p           | 2.07  | 0.00 | 0.94 | 0.98 |
| tRNA       | chr1.tRNA4-GlyCCC       | 5.56  | 0.00 | 0.94 | 0.98 |
| tRNA       | chr6.tRNA75-MetCAT      | 1.36  | 0.00 | 0.94 | 0.98 |
| rRNA       | 5S-L317                 | 1.26  | 0.00 | 0.94 | 0.99 |
| snoRNA     | HBII-55                 | 4.50  | 0.00 | 0.94 | 0.99 |
| piRNA      | piR-36170               | 2.57  | 0.00 | 0.94 | 0.99 |
| mir-3p     | hsa-miR-136-3p          | 2.62  | 0.00 | 0.94 | 0.99 |
| rRNA       | 5S-L983                 | 1.77  | 0.00 | 0.95 | 0.99 |
| rRNA       | 5S-L558                 | 7.28  | 0.00 | 0.95 | 0.99 |
| mir-5p3pno | hsa-miR-1278            | 1.56  | 0.00 | 0.95 | 0.99 |
| scRNA      | BC200-L11               | 1.53  | 0.00 | 0.95 | 0.99 |
| tRF3       | chr22.tRNA1-SeCTCA-tRF  | 4.56  | 0.00 | 0.95 | 0.99 |
| scRNA      | BC200-L117              | 1.83  | 0.00 | 0.95 | 0.99 |
| scRNA      | HY3-L159                | 3.19  | 0.00 | 0.95 | 0.99 |
| piRNA      | piR-32678               | 6.09  | 0.00 | 0.95 | 0.99 |
| tRNA       | chr19.tRNA2-GlyTCC      | 4.14  | 0.00 | 0.95 | 0.99 |
| snRNA      | U7-L159                 | 1.62  | 0.00 | 0.95 | 0.99 |
| scRNA      | HY1                     | 6.00  | 0.00 | 0.95 | 0.99 |
| snoRNA     | U105B                   | 4.75  | 0.00 | 0.95 | 0.99 |
| rRNA       | 5S-L997                 | 1.97  | 0.00 | 0.95 | 0.99 |
| tRNA       | chr20.tRNA3-PseudoCAC   | 1.30  | 0.00 | 0.95 | 0.99 |
| mir-5p3pno | hsa-miR-889             | 2.82  | 0.00 | 0.96 | 0.99 |
| rRNA       | 5S-L1152                | 1.59  | 0.00 | 0.96 | 0.99 |
| mir-5p     | hsa-miR-654-5p          | 3.09  | 0.00 | 0.96 | 0.99 |
| piRNA      | piR-36041               | 7.32  | 0.00 | 0.96 | 0.99 |
| mir-5p3pno | hsa-miR-326             | 1.98  | 0.00 | 0.96 | 0.99 |
| rRNA       | LSU-rRNA_Hsa-L388       | 10.79 | 0.00 | 0.96 | 0.99 |
| snoRNA     | U45C                    | 2.62  | 0.00 | 0.97 | 0.99 |
| snRNA      | U1-L138                 | 3.38  | 0.00 | 0.97 | 0.99 |
| snoRNA     | HBII-234                | 2.39  | 0.00 | 0.97 | 0.99 |
| rRNA       | 5S-L1255                | 1.70  | 0.00 | 0.97 | 0.99 |
| mir-5p     | hsa-miR-221-5p          | 3.85  | 0.00 | 0.97 | 0.99 |
| mir-3p     | hsa-miR-23a-3p          | 6.59  | 0.00 | 0.97 | 0.99 |
| snRNA      | U1-L78                  | 1.40  | 0.00 | 0.97 | 0.99 |
| tRF3       | chr10.tRNA2-SerTGA-tRF  | 2.00  | 0.00 | 0.97 | 0.99 |
| mir-5p3pno | hsa-miR-543             | 5.86  | 0.00 | 0.97 | 0.99 |
| mir-3p     | hsa-miR-3150b-3p        | 1.47  | 0.00 | 0.97 | 0.99 |
| tRNA       | chr12.tRNA5-AspGTC      | 4.66  | 0.00 | 0.97 | 0.99 |
| rRNA       | 5S-L21                  | 2.71  | 0.00 | 0.97 | 0.99 |
| scRNA      | HY4-L47                 | 2.67  | 0.00 | 0.97 | 0.99 |
| scRNA      | HY1-L184                | 3.77  | 0.00 | 0.97 | 0.99 |
| tRF5       | chr17.tRNA26-CysGCA-tRF | 5.39  | 0.00 | 0.97 | 0.99 |

|            |                        |      |      |      |      |
|------------|------------------------|------|------|------|------|
| piRNA      | piR-61298              | 1.91 | 0.00 | 0.98 | 1.00 |
| mir-5p3pno | hsa-miR-134            | 6.74 | 0.00 | 0.98 | 1.00 |
| scRNA      | HY1-L26                | 2.97 | 0.00 | 0.98 | 1.00 |
| scRNA      | HY4-L160               | 7.28 | 0.00 | 0.98 | 1.00 |
| mir-3p     | hsa-miR-501-3p         | 4.83 | 0.00 | 0.98 | 1.00 |
| rRNA       | 5S-L363                | 1.50 | 0.00 | 0.98 | 1.00 |
| snoRNA     | ACA8                   | 2.21 | 0.00 | 0.98 | 1.00 |
| snRNA      | U5-L67                 | 7.03 | 0.00 | 0.98 | 1.00 |
| snoRNA     | HBII-99B               | 1.87 | 0.00 | 0.99 | 1.00 |
| mir-5p     | hsa-miR-3614-5p        | 1.91 | 0.00 | 0.99 | 1.00 |
| scRNA      | HY3-L525               | 1.38 | 0.00 | 0.99 | 1.00 |
| rRNA       | 5S-L758                | 2.59 | 0.00 | 0.99 | 1.00 |
| rRNA       | 5S-L1143               | 1.64 | 0.00 | 0.99 | 1.00 |
| tRF3       | chr14.tRNA14-GluTTC-tR | 2.02 | 0.00 | 0.99 | 1.00 |
| scRNA      | HY4-L34                | 1.71 | 0.00 | 0.99 | 1.00 |
| scRNA      | HY1-L259               | 5.48 | 0.00 | 0.99 | 1.00 |
| mir-5p3pno | hsa-miR-3928           | 1.51 | 0.00 | 0.99 | 1.00 |
| scRNA      | HY1-L121               | 2.72 | 0.00 | 0.99 | 1.00 |
| snRNA      | U1-L47                 | 1.98 | 0.00 | 0.99 | 1.00 |
| mir-5p3pno | hsa-miR-1180           | 4.05 | 0.00 | 0.99 | 1.00 |
| tRNA       | chr6.tRNA136-ValAAC    | 2.04 | 0.00 | 0.99 | 1.00 |
| tRNA       | chr14.tRNA23-ProAGG    | 2.14 | 0.00 | 0.99 | 1.00 |
| mir-5p     | hsa-miR-214-5p         | 1.57 | 0.00 | 0.99 | 1.00 |
| tRNA       | chr16.tRNA10-LysCTT    | 4.96 | 0.00 | 0.99 | 1.00 |
| mir-3p     | hsa-miR-28-3p          | 7.13 | 0.00 | 0.99 | 1.00 |
| rRNA       | LSU-rRNA_Hsa-L150      | 3.40 | 0.00 | 1.00 | 1.00 |
| piRNA      | piR-36716              | 2.87 | 0.00 | 1.00 | 1.00 |
| snoRNA     | ACA18                  | 2.07 | 0.00 | 1.00 | 1.00 |
| mir-5p3pno | hsa-miR-494            | 1.75 | 0.00 | 1.00 | 1.00 |
